# Supplementary material for: Suppressors of Break-Induced Replication in Human Cells
Source: MDPI journal article supplement (doi:10.3390/genes14020398), 2023-02-03
Supplement: s1 [file s1]

Supplementary Figure S1: COPS2 Western blot, sequence alignments

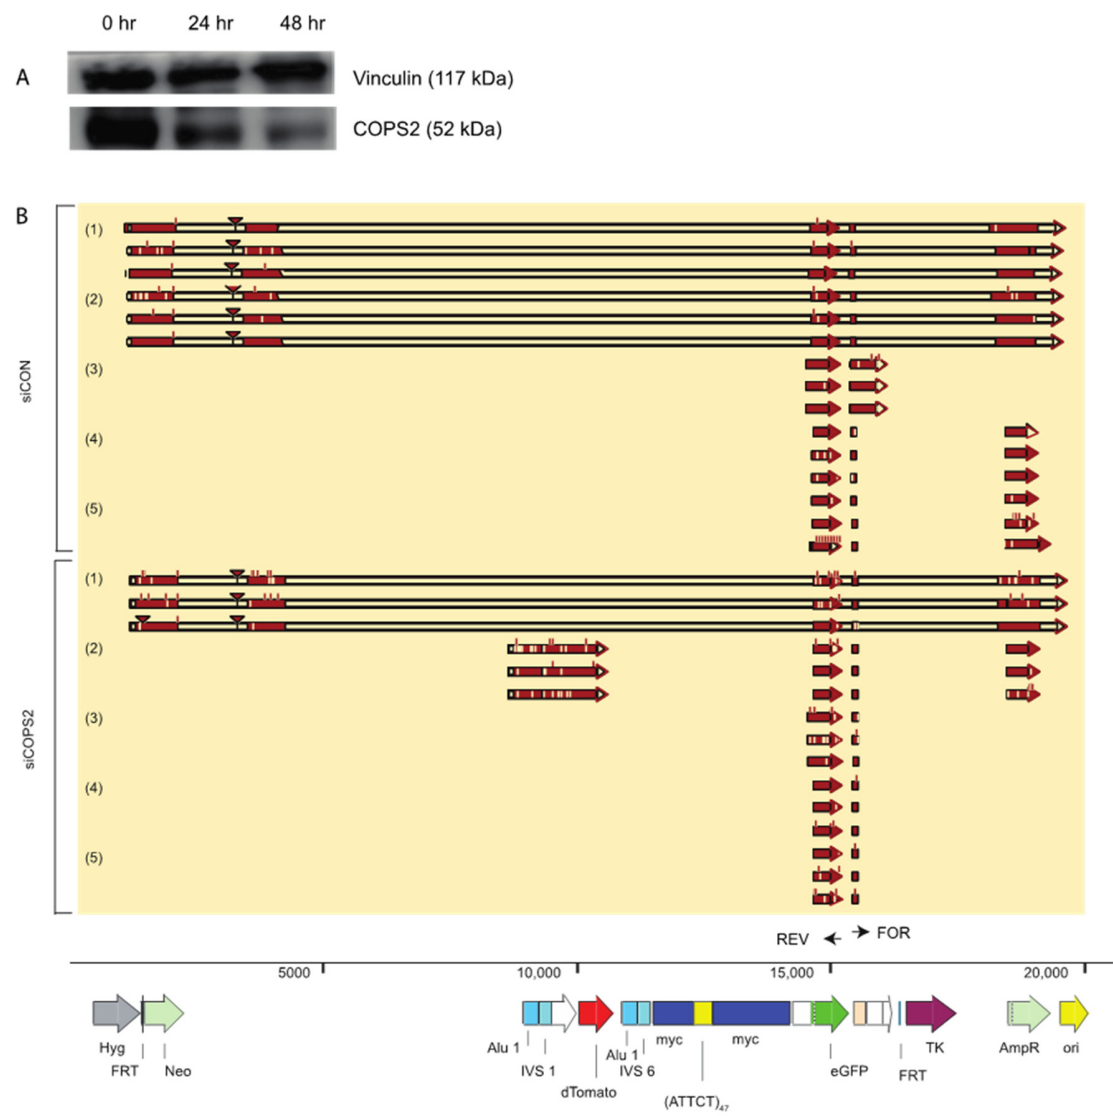



Supplementary Figure S2: Mutation quantitation maps.

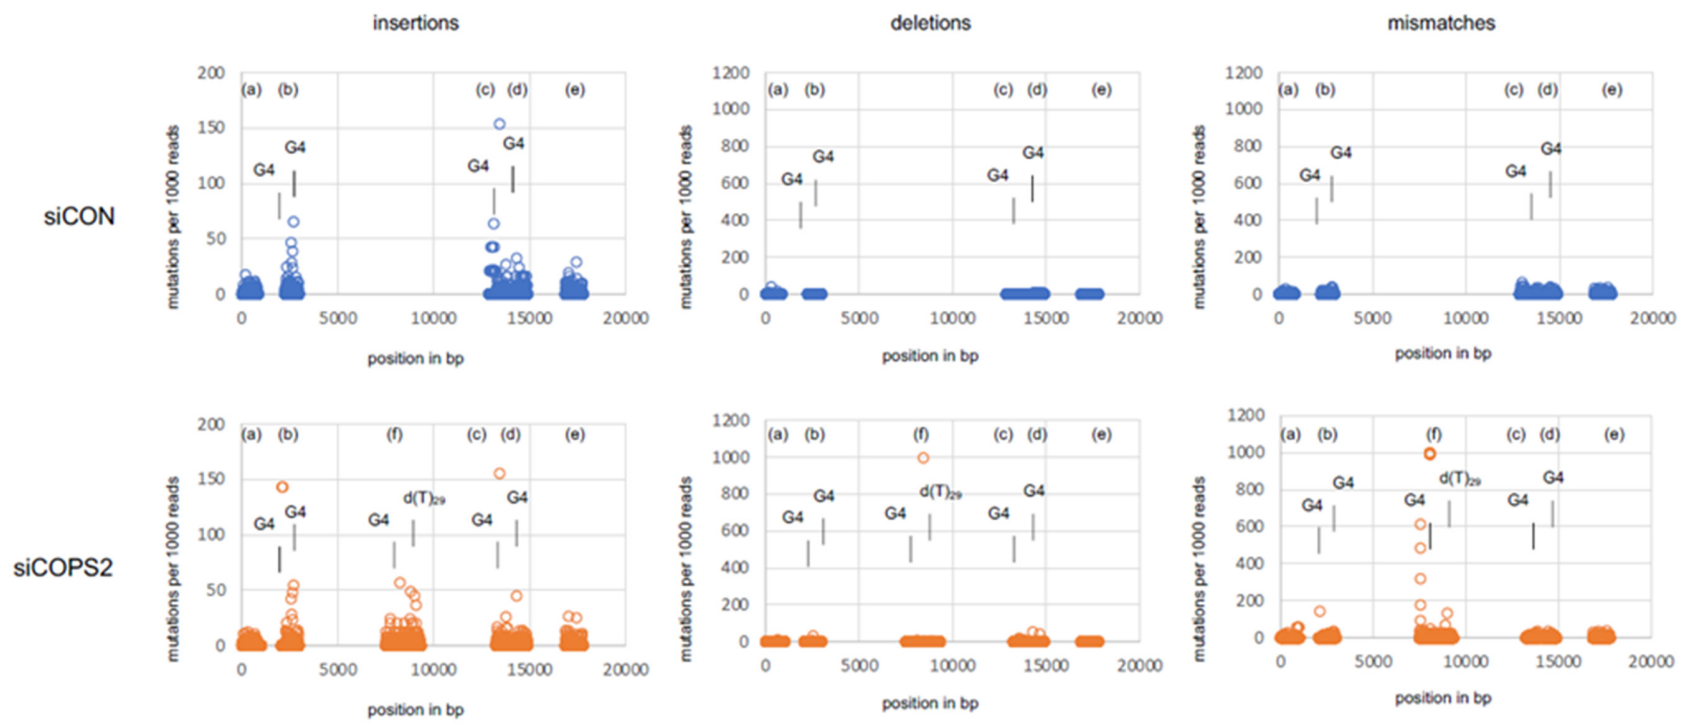

Supplementary Figure S3: Schematics of rearrangements.

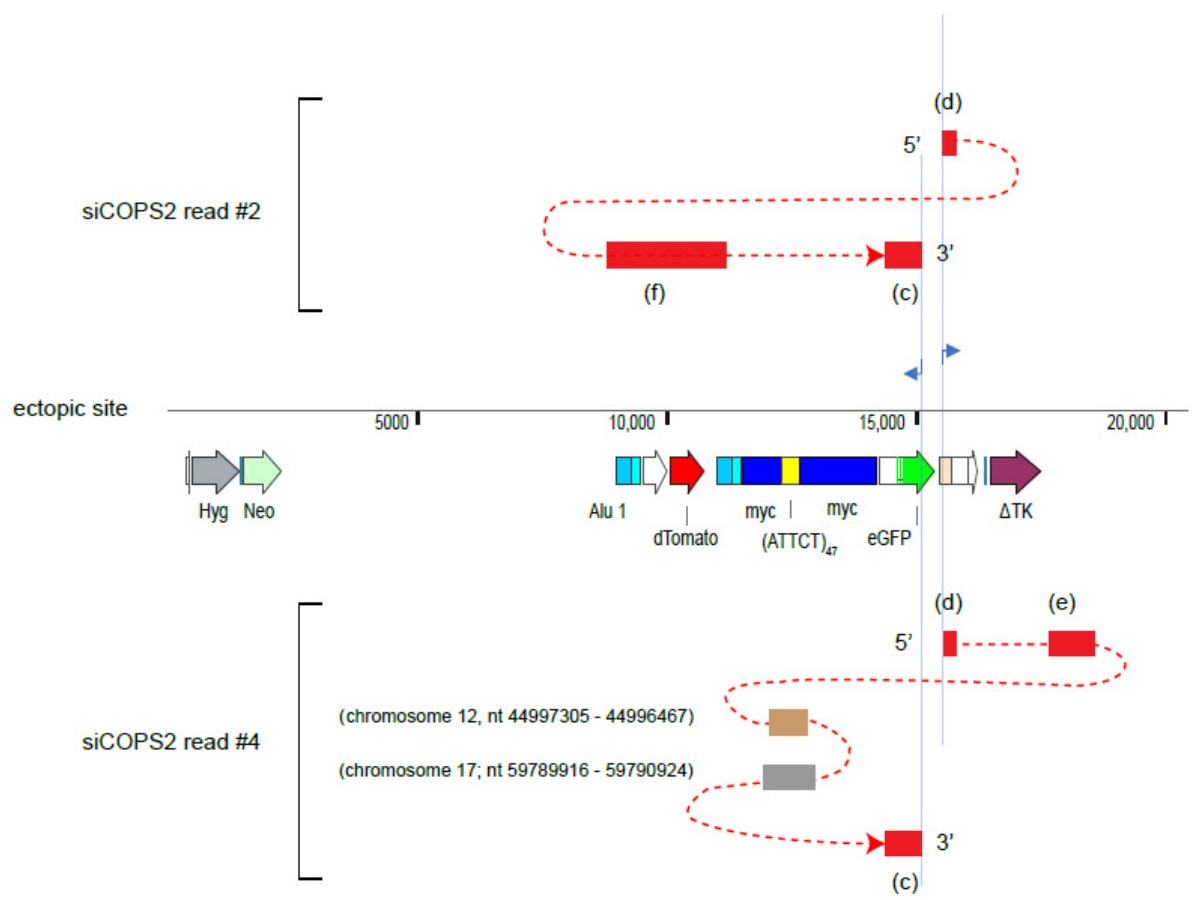

Supplementary Figure S4: Mutation signatures. Analysis of transitions and transversions from cells treated with siCON or siCOPS2 are indicated. Error bars indicate SD. *p* values were derived using Student's t-test tailed.

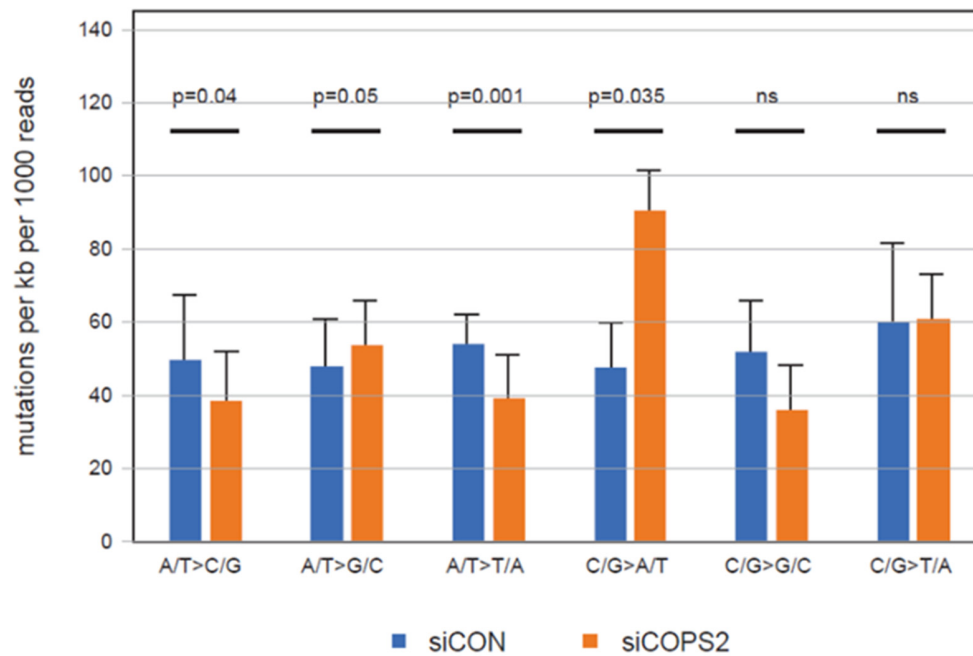

Supplementary Table S1: siRNAs

**siRNAs re- Figure 10**

| Locus      | siRNA   | Provider | Sequence               |
|------------|---------|----------|------------------------|
| COPS2      | s17803  | Ambion   | CGAUUAUACUGCACUAGAUATT |
| KIAA1244   | s32912  | Ambion   | CCAGGUCUUUGCUAAUGCATT  |
| DNAJA3     | s17346  | Ambion   | GAAAGCCUAUUAUCAGCUUTT  |
| EIF3H      | s16508  | Ambion   | GAGGAAUACUAGUAAACAATT  |
| H3F3B      | s6424   | Ambion   | GACUGCACUUGUUCUCAUATT  |
| RAD9A      | a11721  | Ambion   | GACAUUGACUCUACAUGATT   |
| PYGL       | s534288 | Ambion   | GGUACGAGGCAAAAGAAUATT  |
| PHF16      | s18860  | Ambion   | GGUCAAUGUAUAGGAUCATT   |
| NXN        | s34657  | Ambion   | CAACAUUCCAUCACUAAUATT  |
| DHX40      | s36047  | Ambion   | GAACUAAUCAGGAAGCUUATT  |
| Rad50      | s792    | Ambion   | GGAAUAGACUUAGAUCGAATT  |
| control #1 | 4398043 | Ambion   | (undisclosed)          |

Supplementary Table S2: Candidate p values

|                   |              | Benjamini-Hochberg FDR = 0.001<br>Adjusted p-value cut-offs |           |            |           |  |                          |              |              |              |
|-------------------|--------------|-------------------------------------------------------------|-----------|------------|-----------|--|--------------------------|--------------|--------------|--------------|
|                   |              | Control                                                     | HU        | Dox        | HU+Dox    |  |                          |              |              |              |
|                   |              | 7.972E-04                                                   | 7.619E-04 | 8.124E-04  | 5.624E-04 |  |                          |              |              |              |
|                   |              | adjusted p values                                           |           |            |           |  | shRNA candidates p < FDR |              |              |              |
| Clone ID          | Gene ID      | Control                                                     | HU        | Dox        | HU+Dox    |  | Control                  | HU           | Dox          | HU+Dox       |
| V3SVHSHC_9290615  | COPS2        | 6.050E-88                                                   | 5.015E-54 | 2.387E-91  | 3.412E-73 |  | COPS2                    | COPS2        | COPS2        | COPS2        |
| V3SVHSHC_9153236  | LOC100130357 | 9.336E-60                                                   | 8.387E-53 | 5.484E-38  | 8.807E-30 |  | LOC100130357             | LOC100130357 | LOC100130357 | LOC100130357 |
| V3SVHSHC_10728788 | OR4M2        | 2.000E-57                                                   |           |            |           |  | OR4M2                    |              |              |              |
| V3SVHSHC_4664345  | DCUN1D2      | 5.163E-52                                                   |           | 1.261E-13  |           |  | DCUN1D2                  |              | DCUN1D2      |              |
| V3SVHSHC_5641277  | NLRP2        | 5.583E-50                                                   |           |            |           |  | NLRP2                    |              |              |              |
| V3SVHSHC_6017675  | SRSF8        | 7.426E-49                                                   | 1.189E-36 | 2.120E-57  | 8.409E-49 |  | SRSF8                    | SRSF8        | SRSF8        | SRSF8        |
| V3SVHSHC_5416877  | G0S2         | 2.128E-47                                                   | 8.097E-34 | 2.845E-111 | 5.503E-86 |  | G0S2                     | G0S2         | G0S2         | G0S2         |
| V3SVHSHC_9074597  | DALRD3       | 9.136E-47                                                   |           |            |           |  | DALRD3                   |              |              |              |
| V3SVHSHC_7846700  | RPUSD1       | 3.133E-42                                                   |           |            |           |  | RPUSD1                   |              |              |              |
| V3SVHSHC_9595172  | FOXG1        | 3.576E-41                                                   |           |            |           |  | FOXG1                    |              |              |              |
| V3SVHSHC_8315234  | MROH5        | 5.446E-41                                                   |           |            |           |  | MROH5                    |              |              |              |
| V3SVHSHC_5401961  | SMC2         | 1.172E-37                                                   |           |            |           |  | SMC2                     |              |              |              |
| V3SVHSHC_6748823  | ZNF418       | 2.457E-37                                                   |           |            |           |  | ZNF418                   |              |              |              |
| V3SVHSHC_9494588  | FAT3         | 1.027E-36                                                   |           |            |           |  | FAT3                     |              |              |              |
| V3SVHSHC_4804892  | LOC101927859 | 2.902E-36                                                   |           |            |           |  | LOC101927859             |              |              |              |
| V3SVHSHC_6205709  | MTNR1B       | 5.678E-36                                                   |           |            |           |  | MTNR1B                   |              |              |              |
| V3SVHSHC_10036910 | LCP2         | 1.713E-35                                                   |           |            |           |  | LCP2                     |              |              |              |
| V3SVHSHC_8882504  | AQP11        | 5.627E-35                                                   |           |            |           |  | AQP11                    |              |              |              |
| V3SVHSHC_5471657  | PIGY         | 8.546E-34                                                   |           |            |           |  | PIGY                     |              |              |              |
| V3SVHSHC_7556234  | DND1         | 1.837E-33                                                   |           |            |           |  | DND1                     |              |              |              |
| V3SVHSHC_10661006 | SMARCD2      | 4.078E-33                                                   |           |            |           |  | SMARCD2                  |              |              |              |
| V3SVHSHC_9611969  | RHOF         | 7.252E-33                                                   |           |            |           |  | RHOF                     |              |              |              |
| V3SVHSHC_10773371 | ANGPTL4      | 2.134E-32                                                   |           |            |           |  | ANGPTL4                  |              |              |              |
| V3SVHSHC_7307810  | C1QL3        | 2.512E-32                                                   |           |            |           |  | C1QL3                    |              |              |              |
| V3SVHSHC_9720176  | MAGEB1       | 3.678E-32                                                   |           |            |           |  | MAGEB1                   |              |              |              |
| V3SVHSHC_8914448  | CCL14        | 9.762E-32                                                   |           |            |           |  | CCL14                    |              |              |              |
| V3SVHSHC_7638899  | GLTSCR1L     | 1.763E-31                                                   |           | 3.358E-07  |           |  | GLTSCR1L                 |              | GLTSCR1L     |              |
| V3SVHSHC_5420639  | KCNE2        | 2.051E-31                                                   |           |            |           |  | KCNE2                    |              |              |              |
| V3SVHSHC_5428757  | CCDC64       | 3.210E-31                                                   |           |            |           |  | CCDC64                   |              |              |              |
| V3SVHSHC_5567852  | HYPK         | 4.191E-31                                                   |           |            |           |  | HYPK                     |              |              |              |
| V3SVHSHC_8724698  | KIAA1244     | 6.857E-31                                                   | 1.266E-32 | 2.106E-40  | 2.197E-50 |  | KIAA1244                 | KIAA1244     | KIAA1244     | KIAA1244     |
| V3SVHSHC_6011372  | PCYT1A       | 8.094E-31                                                   |           |            |           |  | PCYT1A                   |              |              |              |
| V3SVHSHC_6506372  | CBR1         | 1.080E-30                                                   |           |            |           |  | CBR1                     |              |              |              |
| V3SVHSHC_10706018 | BDH2         | 1.105E-30                                                   |           |            |           |  | BDH2                     |              |              |              |
| V3SVHSHC_8309459  | LRP4         | 2.061E-30                                                   |           |            |           |  | LRP4                     |              |              |              |
| V3SVHSHC_6582041  | LOC101930355 | 3.102E-30                                                   |           |            |           |  | LOC101930355             |              |              |              |
| V3SVHSHC_5116709  | LOC101928268 | 4.366E-30                                                   |           |            |           |  | LOC101928268             |              |              |              |
| V3SVHSHC_10463171 | CCL25        | 5.689E-30                                                   |           |            |           |  | CCL25                    |              |              |              |
| V3SVHSHC_8269628  | PIK3C3       | 1.083E-29                                                   |           |            |           |  | PIK3C3                   |              |              |              |
| V3SVHSHC_6909401  | FAM71E2      | 1.385E-29                                                   |           |            |           |  | FAM71E2                  |              |              |              |

|                   |           |           |           |           |           |  |           |           |        |       |
|-------------------|-----------|-----------|-----------|-----------|-----------|--|-----------|-----------|--------|-------|
| V3SVHSHC_7076447  | CCDC64    | 1.542E-29 | 2.053E-20 |           |           |  | CCDC64    | CCDC64    |        |       |
| V3SVHSHC_6979394  | LOC389831 | 1.604E-29 |           |           |           |  | LOC389831 |           |        |       |
| V3SVHSHC_10138649 | FDCSP     | 1.670E-29 |           |           |           |  | FDCSP     |           |        |       |
| V3SVHSHC_6381236  | Ms4a15    | 2.116E-29 |           |           |           |  | Ms4a15    |           |        |       |
| V3SVHSHC_9167921  | IQGAP2    | 3.255E-29 |           |           |           |  | IQGAP2    |           |        |       |
| V3SVHSHC_7326983  | PMM1      | 3.326E-29 |           |           |           |  | PMM1      |           |        |       |
| V3SVHSHC_9562139  | EIF3H     | 4.219E-29 | 3.468E-20 | 9.411E-43 | 8.537E-23 |  | EIF3H     | EIF3H     | EIF3H  | EIF3H |
| V3SVHSHC_9081725  | ZNF300    | 6.133E-29 |           |           |           |  | ZNF300    |           |        |       |
| V3SVHSHC_6237356  | VPS11     | 6.357E-29 |           |           |           |  | VPS11     |           |        |       |
| V3SVHSHC_10124063 | LCN12     | 6.393E-29 |           |           |           |  | LCN12     |           |        |       |
| V3SVHSHC_5580194  | ETFDH     | 1.129E-28 |           |           |           |  | ETFDH     |           |        |       |
| V3SVHSHC_9383543  | SGCB      | 1.577E-28 |           |           |           |  | SGCB      |           |        |       |
| V3SVHSHC_8800664  | ZNF202    | 1.662E-28 |           |           |           |  | ZNF202    |           |        |       |
| V3SVHSHC_7877720  | ZNF468    | 2.586E-28 |           |           |           |  | ZNF468    |           |        |       |
| V3SVHSHC_10702025 | MTRNR2L10 | 7.468E-28 |           |           |           |  | MTRNR2L10 |           |        |       |
| V3SVHSHC_8433638  | FAM24A    | 8.702E-28 |           |           |           |  | FAM24A    |           |        |       |
| V3SVHSHC_5984873  | RAP1GDS1  | 9.620E-28 |           |           |           |  | RAP1GDS1  |           |        |       |
| V3SVHSHC_7504028  | C20ORF166 | 1.581E-27 | 7.678E-10 |           |           |  | C20ORF166 | C20ORF166 |        |       |
| V3SVHSHC_9773405  | PAGE2B    | 1.823E-27 |           |           |           |  | PAGE2B    |           |        |       |
| V3SVHSHC_7670018  | OR9Q2     | 1.845E-27 |           |           |           |  | OR9Q2     |           |        |       |
| V3SVHSHC_6376022  | TBC1D26   | 2.663E-27 |           |           |           |  | TBC1D26   |           |        |       |
| V3SVHSHC_10666781 | CALCOCO1  | 2.717E-27 |           |           |           |  | CALCOCO1  |           |        |       |
| V3SVHSHC_4728035  | NNAT      | 2.778E-27 |           |           |           |  | NNAT      |           |        |       |
| V3SVHSHC_10637147 | C12orf49  | 2.989E-27 |           |           |           |  | C12orf49  |           |        |       |
| V3SVHSHC_6060806  | WDR96     | 3.488E-27 |           |           |           |  | WDR96     |           |        |       |
| V3SVHSHC_7725260  | FGF18     | 4.012E-27 |           |           |           |  | FGF18     |           |        |       |
| V3SVHSHC_8109908  | CCDC86    | 5.503E-27 |           |           |           |  | CCDC86    |           |        |       |
| V3SVHSHC_7974311  | ANKRD13D  | 6.211E-27 |           |           |           |  | ANKRD13D  |           |        |       |
| V3SVHSHC_6251612  | C15orf60  | 2.750E-26 |           |           |           |  | C15orf60  |           |        |       |
| V3SVHSHC_6459875  | DCAF15    | 2.859E-26 |           |           |           |  | DCAF15    |           |        |       |
| V3SVHSHC_10733573 | PALLD     | 3.416E-26 |           |           |           |  | PALLD     |           |        |       |
| V3SVHSHC_9550391  | CORO2B    | 3.897E-26 |           | 7.181E-07 |           |  | CORO2B    |           | CORO2B |       |
| V3SVHSHC_6818222  | PSMG2     | 4.101E-26 |           |           |           |  | PSMG2     |           |        |       |
| V3SVHSHC_9555605  | GOLGB1    | 4.554E-26 |           |           |           |  | GOLGB1    |           |        |       |
| V3SVHSHC_9096740  | GOT2      | 7.409E-26 |           |           |           |  | GOT2      |           |        |       |
| V3SVHSHC_4645766  | SPTSSA    | 7.864E-26 |           |           |           |  | SPTSSA    |           |        |       |
| V3SVHSHC_9589496  | NTF3      | 9.968E-26 |           |           |           |  | NTF3      |           |        |       |
| V3SVHSHC_6508385  | RHBDL2    | 1.136E-25 |           |           |           |  | RHBDL2    |           |        |       |
| V3SVHSHC_9812609  | SUOX      | 1.147E-25 |           |           |           |  | SUOX      |           |        |       |
| V3SVHSHC_8691830  | FGF19     | 1.260E-25 |           |           |           |  | FGF19     |           |        |       |
| V3SVHSHC_7132085  | JADE1     | 1.541E-25 |           |           |           |  | JADE1     |           |        |       |
| V3SVHSHC_6580589  | LIPI      | 2.149E-25 |           |           |           |  | LIPI      |           |        |       |
| V3SVHSHC_10254941 | CXCR4     | 2.295E-25 |           |           | 2.875E-06 |  | CXCR4     |           |        | CXCR4 |
| V3SVHSHC_4859705  | SERPINB5  | 4.941E-25 |           |           |           |  | SERPINB5  |           |        |       |
| V3SVHSHC_9673448  | RTL1      | 5.068E-25 |           | 1.969E-01 |           |  | RTL1      |           |        |       |
| V3SVHSHC_7867655  | ZBTB46    | 5.113E-25 |           |           |           |  | ZBTB46    |           |        |       |
| V3SVHSHC_8283620  | KLF9      | 5.528E-25 |           |           |           |  | KLF9      |           |        |       |
| V3SVHSHC_10164290 | PCCB      | 6.694E-25 |           |           |           |  | PCCB      |           |        |       |
| V3SVHSHC_4915673  | HIPK2     | 6.965E-25 |           |           |           |  | HIPK2     |           |        |       |
| V3SVHSHC_6983420  | SRCIN1    | 7.995E-25 |           |           |           |  | SRCIN1    |           |        |       |
| V3SVHSHC_5656688  | ADAMTS2   | 8.939E-25 |           |           |           |  | ADAMTS2   |           |        |       |
| V3SVHSHC_10725125 | GABBR1    | 1.024E-24 |           |           |           |  | GABBR1    |           |        |       |
| V3SVHSHC_5962004  | F3        | 1.180E-24 |           |           |           |  | F3        |           |        |       |
| V3SVHSHC_6928376  | TNFRSF13C | 1.409E-24 |           |           |           |  | TNFRSF13C |           |        |       |



|                   |              |           |           |           |           |  |              |        |        |        |
|-------------------|--------------|-----------|-----------|-----------|-----------|--|--------------|--------|--------|--------|
| V3SVHSHC_10430831 | IL36A        | 1.598E-24 |           |           |           |  | IL36A        |        |        |        |
| V3SVHSHC_5799050  | IMPAD1       | 1.890E-24 | 1.667E-09 | 2.701E-53 | 3.227E-16 |  | IMPAD1       | IMPAD1 | IMPAD1 | IMPAD1 |
| V3SVHSHC_9866300  | NUSAP1       | 2.999E-24 |           |           |           |  | NUSAP1       |        |        |        |
| V3SVHSHC_4971443  | SOX8         | 3.481E-24 |           |           |           |  | SOX8         |        |        |        |
| V3SVHSHC_8428160  | GIP          | 4.121E-24 |           |           |           |  | GIP          |        |        |        |
| V3SVHSHC_10098653 | SUGCT        | 5.851E-24 |           |           |           |  | SUGCT        |        |        |        |
| V3SVHSHC_6910424  | CDR2L        | 6.474E-24 |           |           |           |  | CDR2L        |        |        |        |
| V3SVHSHC_10101656 | CST7         | 6.812E-24 |           |           |           |  | CST7         |        |        |        |
| V3SVHSHC_4751696  | SDAD1        | 8.710E-24 |           |           |           |  | SDAD1        |        |        |        |
| V3SVHSHC_10679057 | MAP4K3       | 1.115E-23 |           |           |           |  | MAP4K3       |        |        |        |
| V3SVHSHC_7958273  | FIS1         | 1.327E-23 |           |           |           |  | FIS1         |        |        |        |
| V3SVHSHC_9656783  | EXT2         | 1.429E-23 |           |           |           |  | EXT2         |        |        |        |
| V3SVHSHC_8003252  | SH3BP2       | 1.438E-23 |           |           |           |  | SH3BP2       |        |        |        |
| V3SVHSHC_6505877  | SOX13        | 1.496E-23 |           |           |           |  | SOX13        |        |        |        |
| V3SVHSHC_8235242  | SOX8         | 1.790E-23 |           |           |           |  | SOX8         |        |        |        |
| V3SVHSHC_7263524  | LDLR         | 1.950E-23 |           |           |           |  | LDLR         |        |        |        |
| V3SVHSHC_9647378  | IDUA         | 2.053E-23 |           |           |           |  | IDUA         |        |        |        |
| V3SVHSHC_5493965  | DSC1         | 2.343E-23 |           |           |           |  | DSC1         |        |        |        |
| V3SVHSHC_6514952  | LRRC48       | 2.393E-23 |           |           |           |  | LRRC48       |        |        |        |
| V3SVHSHC_9010148  | ELAVL1       | 2.451E-23 |           |           |           |  | ELAVL1       |        |        |        |
| V3SVHSHC_8292761  | TRAF6        | 2.469E-23 |           |           |           |  | TRAF6        |        |        |        |
| V3SVHSHC_9855146  | EPHA3        | 3.016E-23 |           |           |           |  | EPHA3        |        |        |        |
| V3SVHSHC_10788221 | C1RL         | 3.671E-23 |           | 5.017E-06 |           |  | C1RL         |        | C1RL   |        |
| V3SVHSHC_5452550  | KIAA1279     | 4.166E-23 |           |           |           |  | KIAA1279     |        |        |        |
| V3SVHSHC_5306195  | KLF17        | 4.831E-23 |           |           |           |  | KLF17        |        |        |        |
| V3SVHSHC_10169339 | HYPK         | 5.265E-23 |           |           |           |  | HYPK         |        |        |        |
| V3SVHSHC_8100272  | ACCSL        | 5.331E-23 |           |           |           |  | ACCSL        |        |        |        |
| V3SVHSHC_9821651  | C3orf36      | 8.486E-23 |           |           |           |  | C3orf36      |        |        |        |
| V3SVHSHC_6923195  | CX3CR1       | 9.195E-23 |           |           |           |  | CX3CR1       |        |        |        |
| V3SVHSHC_10663580 | PPM1J        | 9.288E-23 |           |           |           |  | PPM1J        |        |        |        |
| V3SVHSHC_6034703  | SDF2         | 9.358E-23 |           |           |           |  | SDF2         |        |        |        |
| V3SVHSHC_7188548  | GDPD1        | 1.246E-22 |           |           |           |  | GDPD1        |        |        |        |
| V3SVHSHC_5017841  | EGFR         | 1.322E-22 |           |           |           |  | EGFR         |        |        |        |
| V3SVHSHC_8152280  | SARS2        | 1.322E-22 |           |           |           |  | SARS2        |        |        |        |
| V3SVHSHC_5059256  | CRAT         | 1.335E-22 |           |           |           |  | CRAT         |        |        |        |
| V3SVHSHC_10263389 | NECAP2       | 1.437E-22 |           |           |           |  | NECAP2       |        |        |        |
| V3SVHSHC_7238840  | AK8          | 2.482E-22 |           |           |           |  | AK8          |        |        |        |
| V3SVHSHC_9561182  | EBPL         | 2.550E-22 |           |           | 5.303E-03 |  | EBPL         |        |        |        |
| V3SVHSHC_6356024  | IDUA         | 2.560E-22 |           |           |           |  | IDUA         |        |        |        |
| V3SVHSHC_9403706  | RAB12        | 2.617E-22 |           |           |           |  | RAB12        |        |        |        |
| V3SVHSHC_7718726  | ANXA2R       | 3.002E-22 |           |           |           |  | ANXA2R       |        |        |        |
| V3SVHSHC_5044439  | PIP5K1C      | 3.144E-22 |           |           |           |  | PIP5K1C      |        |        |        |
| V3SVHSHC_5801525  | AMMECR1L     | 3.321E-22 |           |           |           |  | AMMECR1L     |        |        |        |
| V3SVHSHC_6717440  | FXYP6        | 3.467E-22 |           |           |           |  | FXYP6        |        |        |        |
| V3SVHSHC_5611082  | UBE2R2       | 3.589E-22 |           |           |           |  | UBE2R2       |        |        |        |
| V3SVHSHC_8284808  | MBD3         | 3.711E-22 |           |           |           |  | MBD3         |        |        |        |
| V3SVHSHC_9026681  | OR6F1        | 3.905E-22 |           |           |           |  | OR6F1        |        |        |        |
| V3SVHSHC_5219801  | CNIH1        | 4.142E-22 |           |           |           |  | CNIH1        |        |        |        |
| V3SVHSHC_10619987 | C5orf24      | 6.307E-22 |           |           |           |  | C5orf24      |        |        |        |
| V3SVHSHC_7573262  | ISL1         | 7.091E-22 |           |           |           |  | ISL1         |        |        |        |
| V3SVHSHC_5092619  | CXorf57      | 7.110E-22 |           |           |           |  | CXorf57      |        |        |        |
| V3SVHSHC_6307217  | LOC101928764 | 7.841E-22 |           |           |           |  | LOC101928764 |        |        |        |
| V3SVHSHC_7073708  | KCTD14       | 7.956E-22 |           |           |           |  | KCTD14       |        |        |        |
| V3SVHSHC_6335399  | CBWD7        | 7.962E-22 |           |           |           |  | CBWD7        |        |        |        |

|                   |              |           |           |           |           |  |              |       |       |         |
|-------------------|--------------|-----------|-----------|-----------|-----------|--|--------------|-------|-------|---------|
| V3SVHSHC_7398791  | RNF8         | 8.106E-22 |           |           |           |  | RNF8         |       |       |         |
| V3SVHSHC_9645497  | Ernm         | 9.458E-22 |           |           | 4.241E-18 |  | Ernm         |       |       | Ernm    |
| V3SVHSHC_9713642  | SPATS2L      | 9.608E-22 |           |           |           |  | SPATS2L      |       |       |         |
| V3SVHSHC_5893199  | CYB5D2       | 9.914E-22 |           |           |           |  | CYB5D2       |       |       |         |
| V3SVHSHC_6174227  | NADK2        | 1.066E-21 |           |           |           |  | NADK2        |       |       |         |
| V3SVHSHC_10230125 | TRIM45       | 1.147E-21 |           |           |           |  | TRIM45       |       |       |         |
| V3SVHSHC_10541282 | TPD52L3      | 1.262E-21 |           |           |           |  | TPD52L3      |       |       |         |
| V3SVHSHC_5095721  | HERPUD1      | 1.462E-21 |           |           |           |  | HERPUD1      |       |       |         |
| V3SVHSHC_5179178  | WDR55        | 1.515E-21 |           |           |           |  | WDR55        |       |       |         |
| V3SVHSHC_6361370  | TP73         | 1.518E-21 |           |           |           |  | TP73         |       |       |         |
| V3SVHSHC_4754303  | ARPC5L       | 1.664E-21 |           |           |           |  | ARPC5L       |       |       |         |
| V3SVHSHC_6407669  | TMED3        | 1.787E-21 |           |           |           |  | TMED3        |       |       |         |
| V3SVHSHC_6044900  | PRAME        | 2.071E-21 |           |           |           |  | PRAME        |       |       |         |
| V3SVHSHC_7277549  | CDC20B       | 2.138E-21 |           |           |           |  | CDC20B       |       |       |         |
| V3SVHSHC_5383910  | OR2F2        | 2.163E-21 | 2.380E-12 | 2.185E-71 | 2.320E-26 |  | OR2F2        | OR2F2 | OR2F2 | OR2F2   |
| V3SVHSHC_7417634  | SRRD         | 2.294E-21 |           |           |           |  | SRRD         |       |       |         |
| V3SVHSHC_7272500  | MAP1B        | 2.512E-21 |           |           |           |  | MAP1B        |       |       |         |
| V3SVHSHC_8619989  | RABL2A       | 2.661E-21 |           |           |           |  | RABL2A       |       |       |         |
| V3SVHSHC_8974277  | LETMD1       | 2.901E-21 |           |           |           |  | LETMD1       |       |       |         |
| V3SVHSHC_4662167  | GEMIN8       | 3.369E-21 |           |           |           |  | GEMIN8       |       |       |         |
| V3SVHSHC_10063937 | FTMT         | 3.438E-21 |           |           |           |  | FTMT         |       |       |         |
| V3SVHSHC_9169472  | IMPA1        | 3.492E-21 |           |           |           |  | IMPA1        |       |       |         |
| V3SVHSHC_7011965  | ORC5         | 3.904E-21 |           |           |           |  | ORC5         |       |       |         |
| V3SVHSHC_7049057  | COL26A1      | 4.510E-21 |           |           | 8.510E-14 |  | COL26A1      |       |       | COL26A1 |
| V3SVHSHC_9169802  | OR7A5        | 4.641E-21 |           |           |           |  | OR7A5        |       |       |         |
| V3SVHSHC_9502574  | SLC7A3       | 6.125E-21 |           |           |           |  | SLC7A3       |       |       |         |
| V3SVHSHC_6715988  | REP15        | 6.360E-21 |           |           |           |  | REP15        |       |       |         |
| V3SVHSHC_9706118  | OR2W1        | 9.664E-21 |           |           |           |  | OR2W1        |       |       |         |
| V3SVHSHC_9042422  | ZNF132       | 1.031E-20 |           |           | 1.082E-01 |  | ZNF132       |       |       |         |
| V3SVHSHC_7113242  | MACF1        | 1.414E-20 |           |           |           |  | MACF1        |       |       |         |
| V3SVHSHC_5049356  | ARHGEF19     | 1.488E-20 |           |           |           |  | ARHGEF19     |       |       |         |
| V3SVHSHC_6654278  | HK2          | 1.692E-20 |           |           |           |  | HK2          |       |       |         |
| V3SVHSHC_5516471  | PARP3        | 2.073E-20 |           |           |           |  | PARP3        |       |       |         |
| V3SVHSHC_5168321  | VPS39        | 2.165E-20 |           |           |           |  | VPS39        |       |       |         |
| V3SVHSHC_10112513 | Ubash3b      | 2.187E-20 |           |           |           |  | Ubash3b      |       |       |         |
| V3SVHSHC_8927912  | ROR2         | 2.323E-20 |           |           |           |  | ROR2         |       |       |         |
| V3SVHSHC_7731728  | NRIP2        | 2.526E-20 |           |           |           |  | NRIP2        |       |       |         |
| V3SVHSHC_5456906  | EHBP1L1      | 3.013E-20 |           |           |           |  | EHBP1L1      |       |       |         |
| V3SVHSHC_6807761  | RXFP1        | 3.258E-20 |           |           |           |  | RXFP1        |       |       |         |
| V3SVHSHC_9074894  | EVA1B        | 3.272E-20 |           |           |           |  | EVA1B        |       |       |         |
| V3SVHSHC_5606363  | RNASE1       | 3.404E-20 |           |           |           |  | RNASE1       |       |       |         |
| V3SVHSHC_9045524  | ZDHHC3       | 3.427E-20 |           |           |           |  | ZDHHC3       |       |       |         |
| V3SVHSHC_8182178  | TAB2         | 3.716E-20 |           |           |           |  | TAB2         |       |       |         |
| V3SVHSHC_8819903  | PARS2        | 3.983E-20 |           |           |           |  | PARS2        |       |       |         |
| V3SVHSHC_9925238  | NKAIN3       | 4.090E-20 |           |           |           |  | NKAIN3       |       |       |         |
| V3SVHSHC_4883564  | SFRP1        | 4.432E-20 |           |           |           |  | SFRP1        |       |       |         |
| V3SVHSHC_7366088  | ZNF20        | 5.196E-20 |           |           |           |  | ZNF20        |       |       |         |
| V3SVHSHC_5520959  | SYPL1        | 5.285E-20 |           |           |           |  | SYPL1        |       |       |         |
| V3SVHSHC_7395260  | RILPL1       | 5.608E-20 |           |           |           |  | RILPL1       |       |       |         |
| V3SVHSHC_6705989  | TRIM28       | 5.655E-20 |           |           |           |  | TRIM28       |       |       |         |
| V3SVHSHC_9417830  | LARP1B       | 5.835E-20 |           |           |           |  | LARP1B       |       |       |         |
| V3SVHSHC_8485679  | LOC101929070 | 6.012E-20 |           |           |           |  | LOC101929070 |       |       |         |
| V3SVHSHC_8054798  | IL36G        | 7.665E-20 |           |           | 3.919E-01 |  | IL36G        |       |       |         |
| V3SVHSHC_5133275  | LOC101059915 | 7.812E-20 |           |           |           |  | LOC101059915 |       |       |         |

|                   |              |           |           |           |           |  |              |       |        |       |
|-------------------|--------------|-----------|-----------|-----------|-----------|--|--------------|-------|--------|-------|
| V3SVHSHC_9356417  | NXP3         | 7.854E-20 |           |           |           |  | NXP3         |       |        |       |
| V3SVHSHC_6698861  | HS2ST1       | 7.879E-20 |           | 9.048E-17 |           |  | HS2ST1       |       | HS2ST1 |       |
| V3SVHSHC_5704340  | PRAMEF25     | 9.774E-20 |           |           |           |  | PRAMEF25     |       |        |       |
| V3SVHSHC_5496836  | TMPRSS12     | 1.071E-19 |           |           |           |  | TMPRSS12     |       |        |       |
| V3SVHSHC_9840461  | GAGE4        | 1.102E-19 |           |           |           |  | GAGE4        |       |        |       |
| V3SVHSHC_5665466  | C1orf105     | 1.107E-19 |           |           |           |  | C1orf105     |       |        |       |
| V3SVHSHC_6438062  | SDC4         | 1.114E-19 |           |           |           |  | SDC4         |       |        |       |
| V3SVHSHC_6189176  | MTUS1        | 1.120E-19 |           |           |           |  | MTUS1        |       |        |       |
| V3SVHSHC_4938872  | EFHB         | 1.125E-19 |           |           |           |  | EFHB         |       |        |       |
| V3SVHSHC_4927850  | MYBL1        | 1.297E-19 |           |           |           |  | MYBL1        |       |        |       |
| V3SVHSHC_5972069  | NR1H4        | 1.584E-19 |           |           |           |  | NR1H4        |       |        |       |
| V3SVHSHC_9049484  | KDM6B        | 1.726E-19 |           |           |           |  | KDM6B        |       |        |       |
| V3SVHSHC_5626955  | THEMIS       | 2.138E-19 |           |           |           |  | THEMIS       |       |        |       |
| V3SVHSHC_7846502  | FAM177A1     | 2.464E-19 |           |           |           |  | FAM177A1     |       |        |       |
| V3SVHSHC_8193431  | PDE1A        | 2.482E-19 |           |           |           |  | PDE1A        |       |        |       |
| V3SVHSHC_6230426  | IL17B        | 2.572E-19 |           |           |           |  | IL17B        |       |        |       |
| V3SVHSHC_8904713  | ACTN2        | 3.229E-19 |           |           |           |  | ACTN2        |       |        |       |
| V3SVHSHC_9546563  | SUDS3        | 3.414E-19 | 5.247E-13 | 7.036E-27 | 8.122E-05 |  | SUDS3        | SUDS3 | SUDS3  | SUDS3 |
| V3SVHSHC_10111061 | RASSF4       | 4.038E-19 |           |           |           |  | RASSF4       |       |        |       |
| V3SVHSHC_8521352  | IFNL4        | 4.165E-19 |           |           |           |  | IFNL4        |       |        |       |
| V3SVHSHC_6729815  | NUDT12       | 4.536E-19 |           |           |           |  | NUDT12       |       |        |       |
| V3SVHSHC_7605338  | TMEM150B     | 4.627E-19 |           |           |           |  | TMEM150B     |       |        |       |
| V3SVHSHC_4990979  | AGPAT9       | 5.047E-19 |           |           |           |  | AGPAT9       |       |        |       |
| V3SVHSHC_9260321  | C5orf55      | 5.065E-19 |           |           |           |  | C5orf55      |       |        |       |
| V3SVHSHC_6794594  | TMEM165      | 5.146E-19 |           |           |           |  | TMEM165      |       |        |       |
| V3SVHSHC_8453471  | SPERT        | 5.197E-19 |           |           |           |  | SPERT        |       |        |       |
| V3SVHSHC_8482115  | HSF4         | 5.202E-19 |           |           |           |  | HSF4         |       |        |       |
| V3SVHSHC_9866003  | STX1A        | 5.439E-19 |           |           |           |  | STX1A        |       |        |       |
| V3SVHSHC_9077897  | GPR113       | 5.615E-19 |           |           |           |  | GPR113       |       |        |       |
| V3SVHSHC_7488749  | KCNK16       | 5.622E-19 |           |           |           |  | KCNK16       |       |        |       |
| V3SVHSHC_9731693  | ZNF20        | 5.639E-19 |           |           |           |  | ZNF20        |       |        |       |
| V3SVHSHC_8033909  | ETV4         | 6.401E-19 |           |           |           |  | ETV4         |       |        |       |
| V3SVHSHC_5459348  | LOC101930637 | 6.627E-19 |           |           |           |  | LOC101930637 |       |        |       |
| V3SVHSHC_10853990 | SLC25A53     | 6.918E-19 |           |           |           |  | SLC25A53     |       |        |       |
| V3SVHSHC_6746117  | ANKRD66      | 7.336E-19 |           |           |           |  | ANKRD66      |       |        |       |
| V3SVHSHC_5123936  | GIP          | 8.101E-19 |           |           |           |  | GIP          |       |        |       |
| V3SVHSHC_5083115  | FHL2         | 8.317E-19 |           |           |           |  | FHL2         |       |        |       |
| V3SVHSHC_9932960  | SGCE         | 8.862E-19 |           |           |           |  | SGCE         |       |        |       |
| V3SVHSHC_8076776  | PIWIL4       | 9.663E-19 |           |           |           |  | PIWIL4       |       |        |       |
| V3SVHSHC_8989457  | STK19        | 9.670E-19 |           |           |           |  | STK19        |       |        |       |
| V3SVHSHC_9381464  | RABEP2       | 9.921E-19 |           |           |           |  | RABEP2       |       |        |       |
| V3SVHSHC_9776342  | VPS11        | 1.003E-18 |           |           |           |  | VPS11        |       |        |       |
| V3SVHSHC_5551451  | OR1G1        | 1.015E-18 |           |           |           |  | OR1G1        |       |        |       |
| V3SVHSHC_5337710  | ASPDH        | 1.048E-18 |           |           |           |  | ASPDH        |       |        |       |
| V3SVHSHC_5169311  | ACTN1        | 1.060E-18 |           | 1.149E-27 |           |  | ACTN1        |       | ACTN1  |       |
| V3SVHSHC_5061995  | KCNS2        | 1.109E-18 |           |           |           |  | KCNS2        |       |        |       |
| V3SVHSHC_6949034  | WDR64        | 1.110E-18 |           |           |           |  | WDR64        |       |        |       |
| V3SVHSHC_9481883  | CRLF3        | 1.280E-18 |           |           |           |  | CRLF3        |       |        |       |
| V3SVHSHC_7891217  | C1orf194     | 1.290E-18 |           |           |           |  | C1orf194     |       |        |       |
| V3SVHSHC_9988235  | PLXNA1       | 1.295E-18 |           |           |           |  | PLXNA1       |       |        |       |
| V3SVHSHC_9404927  | PDHB         | 1.308E-18 |           |           |           |  | PDHB         |       |        |       |
| V3SVHSHC_8183201  | ADORA2A      | 1.315E-18 |           |           |           |  | ADORA2A      |       |        |       |
| V3SVHSHC_9142148  | UBE2V2       | 1.344E-18 |           |           |           |  | UBE2V2       |       |        |       |
| V3SVHSHC_9732353  | ATP7A        | 1.467E-18 |           |           |           |  | ATP7A        |       |        |       |

|                   |              |           |  |           |  |  |              |  |       |  |
|-------------------|--------------|-----------|--|-----------|--|--|--------------|--|-------|--|
| V3SVHSHC_5567588  | FLAD1        | 1.676E-18 |  | 3.044E-35 |  |  | FLAD1        |  | FLAD1 |  |
| V3SVHSHC_9751295  | NBPF19       | 1.830E-18 |  |           |  |  | NBPF19       |  |       |  |
| V3SVHSHC_10539269 | NRTN         | 1.894E-18 |  |           |  |  | NRTN         |  |       |  |
| V3SVHSHC_6554915  | TFDP3        | 1.912E-18 |  | 2.888E-15 |  |  | TFDP3        |  | TFDP3 |  |
| V3SVHSHC_7977083  | GNA12        | 1.955E-18 |  |           |  |  | GNA12        |  |       |  |
| V3SVHSHC_6849506  | DNAJA3       | 1.998E-18 |  |           |  |  | DNAJA3       |  |       |  |
| V3SVHSHC_5423312  | CLDN10       | 2.038E-18 |  |           |  |  | CLDN10       |  |       |  |
| V3SVHSHC_9123767  | HTR3B        | 2.080E-18 |  |           |  |  | HTR3B        |  |       |  |
| V3SVHSHC_4714604  | ZNF740       | 2.401E-18 |  |           |  |  | ZNF740       |  |       |  |
| V3SVHSHC_10832573 | PSMG3        | 2.403E-18 |  |           |  |  | PSMG3        |  |       |  |
| V3SVHSHC_5964446  | PAQR3        | 2.500E-18 |  |           |  |  | PAQR3        |  |       |  |
| V3SVHSHC_5857856  | UBQLN2       | 2.861E-18 |  |           |  |  | UBQLN2       |  |       |  |
| V3SVHSHC_8986949  | MSANTD1      | 2.916E-18 |  |           |  |  | MSANTD1      |  |       |  |
| V3SVHSHC_8112020  | BPIFA2       | 3.065E-18 |  |           |  |  | BPIFA2       |  |       |  |
| V3SVHSHC_4913363  | ROBO4        | 3.494E-18 |  |           |  |  | ROBO4        |  |       |  |
| V3SVHSHC_7137893  | SYT12        | 3.566E-18 |  |           |  |  | SYT12        |  |       |  |
| V3SVHSHC_8780138  | SSBP2        | 3.583E-18 |  |           |  |  | SSBP2        |  |       |  |
| V3SVHSHC_9705821  | ORM2         | 3.677E-18 |  |           |  |  | ORM2         |  |       |  |
| V3SVHSHC_5887226  | SEPT1        | 3.816E-18 |  |           |  |  | SEPT1        |  |       |  |
| V3SVHSHC_7854125  | ZSCAN31      | 4.009E-18 |  |           |  |  | ZSCAN31      |  |       |  |
| V3SVHSHC_9892997  | SLC1A3       | 4.148E-18 |  |           |  |  | SLC1A3       |  |       |  |
| V3SVHSHC_10092350 | GDF2         | 4.289E-18 |  |           |  |  | GDF2         |  |       |  |
| V3SVHSHC_5577653  | SYNPR        | 4.347E-18 |  |           |  |  | SYNPR        |  |       |  |
| V3SVHSHC_7370147  | THBS2        | 4.599E-18 |  |           |  |  | THBS2        |  |       |  |
| V3SVHSHC_9507689  | SNX14        | 4.635E-18 |  |           |  |  | SNX14        |  |       |  |
| V3SVHSHC_5158388  | CD69         | 4.792E-18 |  |           |  |  | CD69         |  |       |  |
| V3SVHSHC_5523236  | IDH3G        | 4.815E-18 |  |           |  |  | IDH3G        |  |       |  |
| V3SVHSHC_6889469  | ATP2B2       | 4.924E-18 |  |           |  |  | ATP2B2       |  |       |  |
| V3SVHSHC_4653356  | CAV1         | 4.935E-18 |  |           |  |  | CAV1         |  |       |  |
| V3SVHSHC_8256593  | EPS8L3       | 5.015E-18 |  |           |  |  | EPS8L3       |  |       |  |
| V3SVHSHC_7956095  | KCTD21       | 5.362E-18 |  |           |  |  | KCTD21       |  |       |  |
| V3SVHSHC_7963421  | PLEKHG7      | 5.620E-18 |  |           |  |  | PLEKHG7      |  |       |  |
| V3SVHSHC_7835414  | CHMP3        | 5.680E-18 |  |           |  |  | CHMP3        |  |       |  |
| V3SVHSHC_9202604  | NSG1         | 5.730E-18 |  |           |  |  | NSG1         |  |       |  |
| V3SVHSHC_8908607  | DERA         | 6.385E-18 |  |           |  |  | DERA         |  |       |  |
| V3SVHSHC_7768160  | ARMC5        | 6.452E-18 |  |           |  |  | ARMC5        |  |       |  |
| V3SVHSHC_7022162  | LOC101928380 | 6.814E-18 |  |           |  |  | LOC101928380 |  |       |  |
| V3SVHSHC_6567488  | MAS1         | 7.067E-18 |  |           |  |  | MAS1         |  |       |  |
| V3SVHSHC_8046053  | ATPAF1       | 7.967E-18 |  |           |  |  | ATPAF1       |  |       |  |
| V3SVHSHC_4792946  | MLLT1        | 8.615E-18 |  |           |  |  | MLLT1        |  |       |  |
| V3SVHSHC_7450766  | RPS12        | 8.711E-18 |  |           |  |  | RPS12        |  |       |  |
| V3SVHSHC_6355496  | SLAMF6       | 9.824E-18 |  |           |  |  | SLAMF6       |  |       |  |
| V3SVHSHC_4661210  | SERPINA6     | 1.038E-17 |  |           |  |  | SERPINA6     |  |       |  |
| V3SVHSHC_5785553  | KLHL13       | 1.137E-17 |  |           |  |  | KLHL13       |  |       |  |
| V3SVHSHC_7400474  | LOC101930512 | 1.138E-17 |  |           |  |  | LOC101930512 |  |       |  |
| V3SVHSHC_6148421  | PLA2G4F      | 1.177E-17 |  |           |  |  | PLA2G4F      |  |       |  |
| V3SVHSHC_7429646  | Slc22a20     | 1.178E-17 |  |           |  |  | Slc22a20     |  |       |  |
| V3SVHSHC_5187692  | COL28A1      | 1.180E-17 |  |           |  |  | COL28A1      |  |       |  |
| V3SVHSHC_9512540  | HTR3D        | 1.199E-17 |  |           |  |  | HTR3D        |  |       |  |
| V3SVHSHC_7957481  | OR6K2        | 1.248E-17 |  |           |  |  | OR6K2        |  |       |  |
| V3SVHSHC_6895013  | OAT          | 1.279E-17 |  |           |  |  | OAT          |  |       |  |
| V3SVHSHC_8744630  | OR2C1        | 1.302E-17 |  |           |  |  | OR2C1        |  |       |  |
| V3SVHSHC_10817492 | TRIM54       | 1.353E-17 |  |           |  |  | TRIM54       |  |       |  |
| V3SVHSHC_9366119  | RPL3L        | 1.493E-17 |  |           |  |  | RPL3L        |  |       |  |

|                   |              |           |           |  |           |  |              |  |  |       |
|-------------------|--------------|-----------|-----------|--|-----------|--|--------------|--|--|-------|
| V3SVHSHC_8297843  | ADRA2C       | 1.535E-17 |           |  |           |  | ADRA2C       |  |  |       |
| V3SVHSHC_9491585  | AMELY        | 1.645E-17 |           |  |           |  | AMELY        |  |  |       |
| V3SVHSHC_7408625  | OR4K13       | 1.671E-17 |           |  |           |  | OR4K13       |  |  |       |
| V3SVHSHC_9209303  | ATE1         | 1.672E-17 |           |  |           |  | ATE1         |  |  |       |
| V3SVHSHC_5054834  | HOXD11       | 1.870E-17 |           |  |           |  | HOXD11       |  |  |       |
| V3SVHSHC_5545412  | INF2         | 1.972E-17 | 4.969E-01 |  |           |  | INF2         |  |  |       |
| V3SVHSHC_9610154  | AP5S1        | 2.025E-17 |           |  |           |  | AP5S1        |  |  |       |
| V3SVHSHC_6069056  | KIDINS220    | 2.084E-17 |           |  |           |  | KIDINS220    |  |  |       |
| V3SVHSHC_9916064  | DBH          | 2.120E-17 |           |  |           |  | DBH          |  |  |       |
| V3SVHSHC_9625367  | HSPB7        | 2.182E-17 |           |  |           |  | HSPB7        |  |  |       |
| V3SVHSHC_9074498  | TRPS1        | 2.287E-17 |           |  |           |  | TRPS1        |  |  |       |
| V3SVHSHC_6844688  | PSMD9        | 2.310E-17 |           |  |           |  | PSMD9        |  |  |       |
| V3SVHSHC_7085390  | ACTR1B       | 2.406E-17 |           |  |           |  | ACTR1B       |  |  |       |
| V3SVHSHC_7746974  | LOC101930546 | 2.435E-17 |           |  |           |  | LOC101930546 |  |  |       |
| V3SVHSHC_5418329  | TIMM9        | 2.444E-17 |           |  |           |  | TIMM9        |  |  |       |
| V3SVHSHC_5689358  | TBCE         | 2.493E-17 |           |  |           |  | TBCE         |  |  |       |
| V3SVHSHC_9786011  | CLIP1        | 2.680E-17 |           |  | 1.929E-09 |  | CLIP1        |  |  | CLIP1 |
| V3SVHSHC_8511617  | NKAIN2       | 2.699E-17 |           |  |           |  | NKAIN2       |  |  |       |
| V3SVHSHC_6307085  | DQX1         | 2.807E-17 |           |  |           |  | DQX1         |  |  |       |
| V3SVHSHC_9788321  | ZNF215       | 3.204E-17 |           |  |           |  | ZNF215       |  |  |       |
| V3SVHSHC_5293754  | KRTAP13-3    | 3.211E-17 |           |  |           |  | KRTAP13-3    |  |  |       |
| V3SVHSHC_7881713  | HSPA1A       | 3.330E-17 |           |  |           |  | HSPA1A       |  |  |       |
| V3SVHSHC_10729085 | EIF1         | 3.355E-17 |           |  |           |  | EIF1         |  |  |       |
| V3SVHSHC_9112217  | PRPF4        | 3.562E-17 |           |  |           |  | PRPF4        |  |  |       |
| V3SVHSHC_5113541  | GPR31        | 3.563E-17 | 2.703E-02 |  | 3.467E-01 |  | GPR31        |  |  |       |
| V3SVHSHC_5109416  | FAM72A       | 3.609E-17 |           |  |           |  | FAM72A       |  |  |       |
| V3SVHSHC_5936198  | PPM1G        | 3.627E-17 |           |  |           |  | PPM1G        |  |  |       |
| V3SVHSHC_10575140 | CASZ1        | 3.974E-17 |           |  |           |  | CASZ1        |  |  |       |
| V3SVHSHC_9638600  | C6orf7       | 4.185E-17 |           |  |           |  | C6orf7       |  |  |       |
| V3SVHSHC_6925967  | VSTM2L       | 4.325E-17 |           |  |           |  | VSTM2L       |  |  |       |
| V3SVHSHC_9956159  | ZNF747       | 4.417E-17 |           |  |           |  | ZNF747       |  |  |       |
| V3SVHSHC_6330185  | C10orf113    | 4.471E-17 |           |  |           |  | C10orf113    |  |  |       |
| V3SVHSHC_10257416 | Camsap3      | 4.582E-17 |           |  |           |  | Camsap3      |  |  |       |
| V3SVHSHC_6314873  | SHCBP1       | 4.707E-17 |           |  |           |  | SHCBP1       |  |  |       |
| V3SVHSHC_7933886  | TMEM98       | 4.750E-17 |           |  |           |  | TMEM98       |  |  |       |
| V3SVHSHC_5955932  | CPE          | 4.783E-17 |           |  |           |  | CPE          |  |  |       |
| V3SVHSHC_7550228  | HRH1         | 5.156E-17 |           |  |           |  | HRH1         |  |  |       |
| V3SVHSHC_6176108  | PATE3        | 5.184E-17 |           |  |           |  | PATE3        |  |  |       |
| V3SVHSHC_6272402  | RAB15        | 5.359E-17 |           |  |           |  | RAB15        |  |  |       |
| V3SVHSHC_10047074 | LIMA1        | 5.428E-17 |           |  |           |  | LIMA1        |  |  |       |
| V3SVHSHC_4801922  | FAM8A1       | 5.951E-17 |           |  |           |  | FAM8A1       |  |  |       |
| V3SVHSHC_8308931  | CLCN2        | 6.033E-17 |           |  |           |  | CLCN2        |  |  |       |
| V3SVHSHC_5181158  | RASA2        | 6.196E-17 |           |  |           |  | RASA2        |  |  |       |
| V3SVHSHC_5574848  | CASP7        | 6.225E-17 |           |  |           |  | CASP7        |  |  |       |
| V3SVHSHC_6844523  | TRADD        | 6.371E-17 |           |  |           |  | TRADD        |  |  |       |
| V3SVHSHC_6076877  | PNKP         | 6.946E-17 |           |  |           |  | PNKP         |  |  |       |
| V3SVHSHC_9045689  | MAPK3        | 7.915E-17 |           |  |           |  | MAPK3        |  |  |       |
| V3SVHSHC_9665891  | UQCRC1       | 9.004E-17 |           |  |           |  | UQCRC1       |  |  |       |
| V3SVHSHC_6432650  | TMOD2        | 9.473E-17 |           |  |           |  | TMOD2        |  |  |       |
| V3SVHSHC_5312960  | NAA11        | 1.008E-16 |           |  |           |  | NAA11        |  |  |       |
| V3SVHSHC_6791723  | ARL11        | 1.090E-16 |           |  |           |  | ARL11        |  |  |       |
| V3SVHSHC_6390113  | TRPM2        | 1.112E-16 |           |  |           |  | TRPM2        |  |  |       |
| V3SVHSHC_5429087  | MOGAT2       | 1.189E-16 |           |  |           |  | MOGAT2       |  |  |       |
| V3SVHSHC_10834058 | PRSS57       | 1.262E-16 |           |  |           |  | PRSS57       |  |  |       |

|                   |              |           |           |           |           |  |              |       |       |       |
|-------------------|--------------|-----------|-----------|-----------|-----------|--|--------------|-------|-------|-------|
| V3SVHSHC_7504061  | AQP8         | 1.370E-16 |           |           |           |  | AQP8         |       |       |       |
| V3SVHSHC_9724895  | CAMK2N1      | 1.407E-16 |           |           |           |  | CAMK2N1      |       |       |       |
| V3SVHSHC_6063314  | ANKFN1       | 1.467E-16 |           |           |           |  | ANKFN1       |       |       |       |
| V3SVHSHC_6278408  | KIAA1033     | 1.507E-16 |           |           |           |  | KIAA1033     |       |       |       |
| V3SVHSHC_5148422  | C17orf112    | 1.521E-16 |           |           |           |  | C17orf112    |       |       |       |
| V3SVHSHC_7688102  | SEC13        | 1.591E-16 |           |           |           |  | SEC13        |       |       |       |
| V3SVHSHC_5297747  | METRNL       | 1.594E-16 |           |           |           |  | METRNL       |       |       |       |
| V3SVHSHC_10432184 | GLRA3        | 1.600E-16 |           |           |           |  | GLRA3        |       |       |       |
| V3SVHSHC_5279168  | CNNM1        | 1.681E-16 |           |           |           |  | CNNM1        |       |       |       |
| V3SVHSHC_8721596  | H2AFJ        | 1.754E-16 |           |           |           |  | H2AFJ        |       |       |       |
| V3SVHSHC_9416972  | ATF6         | 1.757E-16 |           |           |           |  | ATF6         |       |       |       |
| V3SVHSHC_7365164  | SYCE1        | 1.767E-16 |           |           |           |  | SYCE1        |       |       |       |
| V3SVHSHC_9828185  | WNT10B       | 1.835E-16 |           |           |           |  | WNT10B       |       |       |       |
| V3SVHSHC_9455054  | TP53TG3D     | 1.972E-16 |           |           |           |  | TP53TG3D     |       |       |       |
| V3SVHSHC_7437467  | SLC26A5      | 2.010E-16 |           |           |           |  | SLC26A5      |       |       |       |
| V3SVHSHC_10008926 | LOC101930318 | 2.062E-16 |           |           |           |  | LOC101930318 |       |       |       |
| V3SVHSHC_9647708  | SLC34A2      | 2.108E-16 |           | 3.898E-03 |           |  | SLC34A2      |       |       |       |
| V3SVHSHC_9377702  | ZNF569       | 2.193E-16 |           |           |           |  | ZNF569       |       |       |       |
| V3SVHSHC_4644875  | CCL5         | 2.238E-16 |           |           |           |  | CCL5         |       |       |       |
| V3SVHSHC_4980584  | NR2C2        | 2.411E-16 |           |           |           |  | NR2C2        |       |       |       |
| V3SVHSHC_6420143  | KLHL6        | 2.559E-16 | 1.479E-14 | 6.762E-15 | 7.291E-24 |  | KLHL6        | KLHL6 | KLHL6 | KLHL6 |
| V3SVHSHC_4977515  | VAMP8        | 2.787E-16 | 1.910E-06 |           |           |  | VAMP8        | VAMP8 |       |       |
| V3SVHSHC_6791624  | PATE1        | 2.837E-16 |           |           |           |  | PATE1        |       |       |       |
| V3SVHSHC_9969392  | OR7A5        | 2.881E-16 |           |           |           |  | OR7A5        |       |       |       |
| V3SVHSHC_8324540  | MAPK15       | 2.906E-16 |           |           |           |  | MAPK15       |       |       |       |
| V3SVHSHC_9512903  | LAGE3        | 3.009E-16 |           |           |           |  | LAGE3        |       |       |       |
| V3SVHSHC_10001963 | MSH6         | 3.161E-16 |           |           |           |  | MSH6         |       |       |       |
| V3SVHSHC_10348826 | PPP2R2B      | 3.278E-16 |           |           |           |  | PPP2R2B      |       |       |       |
| V3SVHSHC_4976723  | IQCC         | 3.285E-16 |           |           |           |  | IQCC         |       |       |       |
| V3SVHSHC_6296855  | SNAP23       | 3.317E-16 |           |           |           |  | SNAP23       |       |       |       |
| V3SVHSHC_9794426  | HLA-DRA      | 3.540E-16 |           |           |           |  | HLA-DRA      |       |       |       |
| V3SVHSHC_5397407  | NRG3         | 3.605E-16 |           |           |           |  | NRG3         |       |       |       |
| V3SVHSHC_7857194  | TRIM38       | 3.606E-16 |           |           |           |  | TRIM38       |       |       |       |
| V3SVHSHC_10354073 | LIN28B       | 3.650E-16 |           |           |           |  | LIN28B       |       |       |       |
| V3SVHSHC_8590850  | CCL20        | 3.748E-16 |           |           |           |  | CCL20        |       |       |       |
| V3SVHSHC_4829609  | TPRKB        | 3.956E-16 |           |           |           |  | TPRKB        |       |       |       |
| V3SVHSHC_9097565  | NDFIP2       | 4.307E-16 |           |           |           |  | NDFIP2       |       |       |       |
| V3SVHSHC_8843366  | RASSF1       | 4.612E-16 |           |           |           |  | RASSF1       |       |       |       |
| V3SVHSHC_5142284  | TMEM173      | 4.622E-16 |           |           |           |  | TMEM173      |       |       |       |
| V3SVHSHC_6878282  | ACOT1        | 4.916E-16 |           |           |           |  | ACOT1        |       |       |       |
| V3SVHSHC_9581807  | SCAF11       | 5.488E-16 |           |           |           |  | SCAF11       |       |       |       |
| V3SVHSHC_9920189  | CRADD        | 5.515E-16 |           |           |           |  | CRADD        |       |       |       |
| V3SVHSHC_9571808  | LOC100144595 | 5.646E-16 |           |           |           |  | LOC100144595 |       |       |       |
| V3SVHSHC_9416543  | SLC7A11      | 5.655E-16 |           |           |           |  | SLC7A11      |       |       |       |
| V3SVHSHC_8873264  | ARHGDIG      | 5.735E-16 |           |           |           |  | ARHGDIG      |       |       |       |
| V3SVHSHC_6300089  | SPIN1        | 6.166E-16 |           |           |           |  | SPIN1        |       |       |       |
| V3SVHSHC_9199040  | PNLIPRP2     | 6.349E-16 |           |           |           |  | PNLIPRP2     |       |       |       |
| V3SVHSHC_7951145  | MFAP2        | 6.425E-16 |           |           |           |  | MFAP2        |       |       |       |
| V3SVHSHC_9920321  | OR51B5       | 6.726E-16 |           |           |           |  | OR51B5       |       |       |       |
| V3SVHSHC_8548973  | GARS         | 6.787E-16 |           |           |           |  | GARS         |       |       |       |
| V3SVHSHC_6577982  | EEF1G        | 6.799E-16 |           |           |           |  | EEF1G        |       |       |       |
| V3SVHSHC_10411625 | THAP3        | 6.880E-16 |           |           |           |  | THAP3        |       |       |       |
| V3SVHSHC_5879669  | GFRAL        | 6.917E-16 |           |           |           |  | GFRAL        |       |       |       |
| V3SVHSHC_9656057  | Izumo2       | 7.186E-16 |           |           |           |  | Izumo2       |       |       |       |

|                   |              |           |  |           |  |  |              |  |       |  |
|-------------------|--------------|-----------|--|-----------|--|--|--------------|--|-------|--|
| V3SVHSHC_6961772  | B3GNT6       | 7.188E-16 |  |           |  |  | B3GNT6       |  |       |  |
| V3SVHSHC_8447927  | TLX2         | 7.848E-16 |  |           |  |  | TLX2         |  |       |  |
| V3SVHSHC_6386186  | TXNDC15      | 7.930E-16 |  |           |  |  | TXNDC15      |  |       |  |
| V3SVHSHC_5703284  | SLC38A10     | 8.059E-16 |  |           |  |  | SLC38A10     |  |       |  |
| V3SVHSHC_7765718  | NKX2-2       | 8.339E-16 |  |           |  |  | NKX2-2       |  |       |  |
| V3SVHSHC_9646586  | LDLR         | 8.424E-16 |  |           |  |  | LDLR         |  |       |  |
| V3SVHSHC_9665627  | ARL4D        | 8.539E-16 |  |           |  |  | ARL4D        |  |       |  |
| V3SVHSHC_9862571  | TSPAN5       | 8.731E-16 |  |           |  |  | TSPAN5       |  |       |  |
| V3SVHSHC_8975630  | FADS2        | 9.013E-16 |  |           |  |  | FADS2        |  |       |  |
| V3SVHSHC_9734465  | C8orf82      | 9.218E-16 |  |           |  |  | C8orf82      |  |       |  |
| V3SVHSHC_8633321  | LOC101929072 | 1.002E-15 |  |           |  |  | LOC101929072 |  |       |  |
| V3SVHSHC_7233692  | IPO4         | 1.028E-15 |  |           |  |  | IPO4         |  |       |  |
| V3SVHSHC_8362391  | C12ORF5      | 1.040E-15 |  |           |  |  | C12ORF5      |  |       |  |
| V3SVHSHC_7172972  | GYG1         | 1.048E-15 |  |           |  |  | GYG1         |  |       |  |
| V3SVHSHC_8056217  | ZMIZ2        | 1.106E-15 |  |           |  |  | ZMIZ2        |  |       |  |
| V3SVHSHC_8108357  | RAG1         | 1.113E-15 |  |           |  |  | RAG1         |  |       |  |
| V3SVHSHC_8917286  | LIN7A        | 1.162E-15 |  |           |  |  | LIN7A        |  |       |  |
| V3SVHSHC_9704930  | TLX3         | 1.227E-15 |  |           |  |  | TLX3         |  |       |  |
| V3SVHSHC_8746082  | SIK2         | 1.284E-15 |  |           |  |  | SIK2         |  |       |  |
| V3SVHSHC_10419875 | PIK3C2B      | 1.305E-15 |  |           |  |  | PIK3C2B      |  |       |  |
| V3SVHSHC_10337837 | CPLX3        | 1.361E-15 |  |           |  |  | CPLX3        |  |       |  |
| V3SVHSHC_6885377  | LOC100996758 | 1.372E-15 |  |           |  |  | LOC100996758 |  |       |  |
| V3SVHSHC_8539469  | FAF2         | 1.476E-15 |  |           |  |  | FAF2         |  |       |  |
| V3SVHSHC_7887818  | SLC8A1       | 1.488E-15 |  |           |  |  | SLC8A1       |  |       |  |
| V3SVHSHC_7448126  | DEFB118      | 1.533E-15 |  |           |  |  | DEFB118      |  |       |  |
| V3SVHSHC_10577549 | PLEKH01      | 1.569E-15 |  | 2.426E-02 |  |  | PLEKH01      |  |       |  |
| V3SVHSHC_5101067  | SLC6A1       | 1.602E-15 |  |           |  |  | SLC6A1       |  |       |  |
| V3SVHSHC_7673516  | EHMT2        | 1.613E-15 |  |           |  |  | EHMT2        |  |       |  |
| V3SVHSHC_9445880  | GNAT1        | 1.692E-15 |  |           |  |  | GNAT1        |  |       |  |
| V3SVHSHC_8429777  | KCNAB3       | 1.728E-15 |  |           |  |  | KCNAB3       |  |       |  |
| V3SVHSHC_8390243  | SLC13A5      | 1.729E-15 |  |           |  |  | SLC13A5      |  |       |  |
| V3SVHSHC_6493271  | OR7G1        | 1.768E-15 |  |           |  |  | OR7G1        |  |       |  |
| V3SVHSHC_5174723  | STXBP6       | 1.792E-15 |  |           |  |  | STXBP6       |  |       |  |
| V3SVHSHC_7417997  | POP1         | 1.811E-15 |  |           |  |  | POP1         |  |       |  |
| V3SVHSHC_4749287  | ELAVL3       | 1.827E-15 |  |           |  |  | ELAVL3       |  |       |  |
| V3SVHSHC_9094133  | FOSL1        | 1.859E-15 |  |           |  |  | FOSL1        |  |       |  |
| V3SVHSHC_8893493  | RYR1         | 1.898E-15 |  |           |  |  | RYR1         |  |       |  |
| V3SVHSHC_9343613  | SALL1        | 1.898E-15 |  |           |  |  | SALL1        |  |       |  |
| V3SVHSHC_8227223  | CRELD2       | 1.935E-15 |  |           |  |  | CRELD2       |  |       |  |
| V3SVHSHC_9627809  | GAGE8        | 1.960E-15 |  |           |  |  | GAGE8        |  |       |  |
| V3SVHSHC_9277877  | PDCD4        | 1.994E-15 |  | 4.809E-18 |  |  | PDCD4        |  | PDCD4 |  |
| V3SVHSHC_6846734  | DEFB128      | 2.132E-15 |  |           |  |  | DEFB128      |  |       |  |
| V3SVHSHC_4814924  | LOC100505549 | 2.225E-15 |  |           |  |  | LOC100505549 |  |       |  |
| V3SVHSHC_5697773  | ECI1         | 2.250E-15 |  |           |  |  | ECI1         |  |       |  |
| V3SVHSHC_6559172  | KIFC1        | 2.280E-15 |  |           |  |  | KIFC1        |  |       |  |
| V3SVHSHC_10669223 | STAT5B       | 2.410E-15 |  |           |  |  | STAT5B       |  |       |  |
| V3SVHSHC_6640253  | OTOF         | 2.555E-15 |  |           |  |  | OTOF         |  |       |  |
| V3SVHSHC_6078857  | GPR83        | 2.627E-15 |  |           |  |  | GPR83        |  |       |  |
| V3SVHSHC_5699423  | MTR          | 2.663E-15 |  |           |  |  | MTR          |  |       |  |
| V3SVHSHC_9017540  | PPIL4        | 2.690E-15 |  |           |  |  | PPIL4        |  |       |  |
| V3SVHSHC_10727864 | EXD1         | 2.862E-15 |  |           |  |  | EXD1         |  |       |  |
| V3SVHSHC_9667277  | SPINK7       | 2.878E-15 |  |           |  |  | SPINK7       |  |       |  |
| V3SVHSHC_7435157  | CCDC87       | 2.895E-15 |  |           |  |  | CCDC87       |  |       |  |
| V3SVHSHC_7581149  | PPP2R3C      | 3.035E-15 |  |           |  |  | PPP2R3C      |  |       |  |

|                   |           |           |           |  |           |  |           |      |  |  |
|-------------------|-----------|-----------|-----------|--|-----------|--|-----------|------|--|--|
| V3SVHSHC_6949496  | CCK       | 3.161E-15 |           |  |           |  | CCK       |      |  |  |
| V3SVHSHC_10620284 | LRRRC58   | 3.260E-15 |           |  |           |  | LRRRC58   |      |  |  |
| V3SVHSHC_9182045  | Wdr38     | 3.355E-15 |           |  |           |  | Wdr38     |      |  |  |
| V3SVHSHC_7027244  | RAB26     | 3.377E-15 |           |  |           |  | RAB26     |      |  |  |
| V3SVHSHC_6329129  | SNAI1     | 3.484E-15 |           |  |           |  | SNAI1     |      |  |  |
| V3SVHSHC_8397899  | PFDN6     | 3.503E-15 |           |  |           |  | PFDN6     |      |  |  |
| V3SVHSHC_8513663  | C2orf54   | 4.024E-15 |           |  |           |  | C2orf54   |      |  |  |
| V3SVHSHC_6286262  | AGBL2     | 4.313E-15 |           |  |           |  | AGBL2     |      |  |  |
| V3SVHSHC_8532506  | IL2RB     | 4.380E-15 |           |  |           |  | IL2RB     |      |  |  |
| V3SVHSHC_5468753  | VPS4B     | 4.589E-15 |           |  | 3.492E-01 |  | VPS4B     |      |  |  |
| V3SVHSHC_8937020  | MYL6      | 4.758E-15 |           |  |           |  | MYL6      |      |  |  |
| V3SVHSHC_5713349  | OR4C6     | 4.799E-15 |           |  |           |  | OR4C6     |      |  |  |
| V3SVHSHC_9325067  | MYL7      | 4.907E-15 | 3.627E-05 |  |           |  | MYL7      | MYL7 |  |  |
| V3SVHSHC_7270355  | GABARAPL1 | 4.920E-15 |           |  |           |  | GABARAPL1 |      |  |  |
| V3SVHSHC_10558541 | RAD23A    | 5.041E-15 |           |  |           |  | RAD23A    |      |  |  |
| V3SVHSHC_10227089 | P4HTM     | 5.089E-15 |           |  |           |  | P4HTM     |      |  |  |
| V3SVHSHC_7307843  | DMTN      | 5.091E-15 |           |  |           |  | DMTN      |      |  |  |
| V3SVHSHC_6361832  | JAG2      | 5.408E-15 |           |  |           |  | JAG2      |      |  |  |
| V3SVHSHC_4673288  | CAPN9     | 5.642E-15 |           |  |           |  | CAPN9     |      |  |  |
| V3SVHSHC_7567190  | APOA1BP   | 6.071E-15 |           |  |           |  | APOA1BP   |      |  |  |
| V3SVHSHC_9527555  | PRAP1     | 6.343E-15 |           |  |           |  | PRAP1     |      |  |  |
| V3SVHSHC_7933820  | NDUFV3    | 6.429E-15 |           |  |           |  | NDUFV3    |      |  |  |
| V3SVHSHC_8270057  | TAS2R13   | 6.932E-15 |           |  |           |  | TAS2R13   |      |  |  |
| V3SVHSHC_9863231  | RAD9A     | 7.023E-15 |           |  |           |  | RAD9A     |      |  |  |
| V3SVHSHC_5066351  | PLEKHA3   | 7.030E-15 |           |  |           |  | PLEKHA3   |      |  |  |
| V3SVHSHC_9312659  | PARK2     | 7.137E-15 |           |  |           |  | PARK2     |      |  |  |
| V3SVHSHC_7576727  | FCF1      | 7.316E-15 |           |  |           |  | FCF1      |      |  |  |
| V3SVHSHC_7460171  | Ankle1    | 7.392E-15 |           |  |           |  | Ankle1    |      |  |  |
| V3SVHSHC_9053774  | COL28A1   | 7.438E-15 |           |  |           |  | COL28A1   |      |  |  |
| V3SVHSHC_10463831 | EFCAB4B   | 7.592E-15 |           |  |           |  | EFCAB4B   |      |  |  |
| V3SVHSHC_9527984  | FREM3     | 7.963E-15 |           |  |           |  | FREM3     |      |  |  |
| V3SVHSHC_7039454  | PHLPP1    | 8.058E-15 |           |  |           |  | PHLPP1    |      |  |  |
| V3SVHSHC_7034900  | NRF1      | 8.416E-15 |           |  |           |  | NRF1      |      |  |  |
| V3SVHSHC_9823004  | OR6C75    | 8.487E-15 |           |  |           |  | OR6C75    |      |  |  |
| V3SVHSHC_8147099  | NAT16     | 8.512E-15 |           |  |           |  | NAT16     |      |  |  |
| V3SVHSHC_5733017  | C12orf45  | 8.879E-15 |           |  |           |  | C12orf45  |      |  |  |
| V3SVHSHC_10743605 | DSCC1     | 9.044E-15 |           |  |           |  | DSCC1     |      |  |  |
| V3SVHSHC_5724272  | ANP32C    | 9.089E-15 |           |  |           |  | ANP32C    |      |  |  |
| V3SVHSHC_6028367  | MECOM     | 9.452E-15 |           |  |           |  | MECOM     |      |  |  |
| V3SVHSHC_5823569  | PLA2G1B   | 9.692E-15 |           |  |           |  | PLA2G1B   |      |  |  |
| V3SVHSHC_6159872  | ANKRD7    | 9.760E-15 |           |  |           |  | ANKRD7    |      |  |  |
| V3SVHSHC_5264516  | OR52B4    | 1.084E-14 |           |  |           |  | OR52B4    |      |  |  |
| V3SVHSHC_9952958  | OR1Q1     | 1.106E-14 |           |  |           |  | OR1Q1     |      |  |  |
| V3SVHSHC_7040774  | OR5M1     | 1.133E-14 |           |  |           |  | OR5M1     |      |  |  |
| V3SVHSHC_9176732  | LILRA2    | 1.138E-14 |           |  |           |  | LILRA2    |      |  |  |
| V3SVHSHC_7509671  | SRP72     | 1.139E-14 |           |  |           |  | SRP72     |      |  |  |
| V3SVHSHC_8751164  | OR5B12    | 1.144E-14 |           |  |           |  | OR5B12    |      |  |  |
| V3SVHSHC_10446902 | NEK4      | 1.145E-14 |           |  |           |  | NEK4      |      |  |  |
| V3SVHSHC_8427797  | TRAF3IP2  | 1.166E-14 |           |  |           |  | TRAF3IP2  |      |  |  |
| V3SVHSHC_5824724  | USF2      | 1.184E-14 |           |  |           |  | USF2      |      |  |  |
| V3SVHSHC_5723084  | GTF2H3    | 1.184E-14 |           |  |           |  | GTF2H3    |      |  |  |
| V3SVHSHC_7750472  | Pabpc1l2b | 1.186E-14 |           |  |           |  | Pabpc1l2b |      |  |  |
| V3SVHSHC_5163008  | TMEM241   | 1.198E-14 |           |  |           |  | TMEM241   |      |  |  |
| V3SVHSHC_8654243  | REXO1L1P  | 1.218E-14 |           |  |           |  | REXO1L1P  |      |  |  |
| V3SVHSHC_9805382  | NCALD     | 1.242E-14 |           |  |           |  | NCALD     |      |  |  |



|                   |              |           |           |           |  |  |              |        |        |  |
|-------------------|--------------|-----------|-----------|-----------|--|--|--------------|--------|--------|--|
| V3SVHSHC_8744069  | GCM1         | 1.270E-14 |           |           |  |  | GCM1         |        |        |  |
| V3SVHSHC_9272201  | AQP4         | 1.273E-14 |           | 1.452E-08 |  |  | AQP4         |        | AQP4   |  |
| V3SVHSHC_10109675 | NPTX1        | 1.273E-14 |           |           |  |  | NPTX1        |        |        |  |
| V3SVHSHC_6925307  | SPIB         | 1.290E-14 |           |           |  |  | SPIB         |        |        |  |
| V3SVHSHC_9086246  | ACTRT3       | 1.308E-14 |           |           |  |  | ACTRT3       |        |        |  |
| V3SVHSHC_7632233  | CST6         | 1.315E-14 |           |           |  |  | CST6         |        |        |  |
| V3SVHSHC_6619925  | ARF3         | 1.320E-14 |           |           |  |  | ARF3         |        |        |  |
| V3SVHSHC_8927450  | CD302        | 1.340E-14 |           |           |  |  | CD302        |        |        |  |
| V3SVHSHC_9659423  | EED          | 1.355E-14 |           |           |  |  | EED          |        |        |  |
| V3SVHSHC_5111066  | GPR171       | 1.386E-14 |           |           |  |  | GPR171       |        |        |  |
| V3SVHSHC_9389054  | SND1         | 1.406E-14 |           |           |  |  | SND1         |        |        |  |
| V3SVHSHC_4978076  | GABRG2       | 1.734E-14 |           |           |  |  | GABRG2       |        |        |  |
| V3SVHSHC_9864452  | C1orf234     | 1.742E-14 |           |           |  |  | C1orf234     |        |        |  |
| V3SVHSHC_10516631 | PDZRN3       | 1.767E-14 |           |           |  |  | PDZRN3       |        |        |  |
| V3SVHSHC_5116775  | RGL2         | 1.773E-14 |           |           |  |  | RGL2         |        |        |  |
| V3SVHSHC_10810793 | EEF1E1       | 1.907E-14 |           |           |  |  | EEF1E1       |        |        |  |
| V3SVHSHC_4793276  | FAM65A       | 1.929E-14 |           |           |  |  | FAM65A       |        |        |  |
| V3SVHSHC_8260355  | PDSS2        | 1.945E-14 |           |           |  |  | PDSS2        |        |        |  |
| V3SVHSHC_9650381  | LRRC39       | 1.951E-14 |           | 3.904E-12 |  |  | LRRC39       |        | LRRC39 |  |
| V3SVHSHC_6067868  | CEP250       | 1.990E-14 |           |           |  |  | CEP250       |        |        |  |
| V3SVHSHC_4791395  | PEG10        | 2.018E-14 |           |           |  |  | PEG10        |        |        |  |
| V3SVHSHC_5904848  | RHOV         | 2.043E-14 |           |           |  |  | RHOV         |        |        |  |
| V3SVHSHC_7410836  | GPR126       | 2.218E-14 | 8.403E-17 |           |  |  | GPR126       | GPR126 |        |  |
| V3SVHSHC_7169771  | SLC30A9      | 2.245E-14 |           |           |  |  | SLC30A9      |        |        |  |
| V3SVHSHC_10172111 | REM2         | 2.256E-14 |           |           |  |  | REM2         |        |        |  |
| V3SVHSHC_5720015  | SP2          | 2.313E-14 |           |           |  |  | SP2          |        |        |  |
| V3SVHSHC_5855909  | DGUOK        | 2.496E-14 |           |           |  |  | DGUOK        |        |        |  |
| V3SVHSHC_10422944 | LRFN1        | 2.517E-14 |           |           |  |  | LRFN1        |        |        |  |
| V3SVHSHC_7294709  | FOXN1        | 2.588E-14 |           |           |  |  | FOXN1        |        |        |  |
| V3SVHSHC_9430106  | TMEM63C      | 2.669E-14 |           |           |  |  | TMEM63C      |        |        |  |
| V3SVHSHC_4794134  | RMND5A       | 2.743E-14 |           |           |  |  | RMND5A       |        |        |  |
| V3SVHSHC_8270288  | C9orf163     | 2.752E-14 |           |           |  |  | C9orf163     |        |        |  |
| V3SVHSHC_5674607  | POLE4        | 2.836E-14 |           |           |  |  | POLE4        |        |        |  |
| V3SVHSHC_5228612  | SYTL2        | 2.860E-14 |           |           |  |  | SYTL2        |        |        |  |
| V3SVHSHC_9221282  | AGBL1        | 2.984E-14 |           |           |  |  | AGBL1        |        |        |  |
| V3SVHSHC_4887260  | Bend3        | 3.059E-14 |           |           |  |  | Bend3        |        |        |  |
| V3SVHSHC_8759678  | RXRA         | 3.081E-14 |           |           |  |  | RXRA         |        |        |  |
| V3SVHSHC_10503794 | ATE1         | 3.131E-14 |           |           |  |  | ATE1         |        |        |  |
| V3SVHSHC_7678169  | TFE3         | 3.219E-14 |           |           |  |  | TFE3         |        |        |  |
| V3SVHSHC_9312263  | GS1-259H13.2 | 3.297E-14 |           |           |  |  | GS1-259H13.2 |        |        |  |
| V3SVHSHC_7994705  | ALX3         | 3.345E-14 |           |           |  |  | ALX3         |        |        |  |
| V3SVHSHC_6706451  | MX1          | 3.345E-14 |           |           |  |  | MX1          |        |        |  |
| V3SVHSHC_6308108  | ALDH6A1      | 3.431E-14 |           |           |  |  | ALDH6A1      |        |        |  |
| V3SVHSHC_9751394  | ESM1         | 3.462E-14 |           |           |  |  | ESM1         |        |        |  |
| V3SVHSHC_6218546  | LCE2B        | 3.539E-14 |           |           |  |  | LCE2B        |        |        |  |
| V3SVHSHC_5623952  | CA1          | 3.544E-14 |           |           |  |  | CA1          |        |        |  |
| V3SVHSHC_5115455  | PDZRN3       | 3.912E-14 |           |           |  |  | PDZRN3       |        |        |  |
| V3SVHSHC_9106178  | Pabpc1l      | 4.259E-14 |           |           |  |  | Pabpc1l      |        |        |  |
| V3SVHSHC_9309392  | VPS72        | 4.419E-14 |           |           |  |  | VPS72        |        |        |  |
| V3SVHSHC_7787366  | FAM19A3      | 4.458E-14 |           |           |  |  | FAM19A3      |        |        |  |
| V3SVHSHC_9419084  | OR6C1        | 4.814E-14 |           |           |  |  | OR6C1        |        |        |  |
| V3SVHSHC_6742025  | NELFE        | 4.927E-14 |           |           |  |  | NELFE        |        |        |  |
| V3SVHSHC_8941211  | AKR1C1       | 5.089E-14 |           |           |  |  | AKR1C1       |        |        |  |
| V3SVHSHC_9226364  | ARL8B        | 5.119E-14 |           |           |  |  | ARL8B        |        |        |  |
| V3SVHSHC_8575241  | CTAG1B       | 5.344E-14 |           |           |  |  | CTAG1B       |        |        |  |

|                   |              |           |           |           |           |  |              |        |      |      |
|-------------------|--------------|-----------|-----------|-----------|-----------|--|--------------|--------|------|------|
| V3SVHSHC_9456374  | TRIM32       | 5.351E-14 | 9.425E-17 |           |           |  | TRIM32       | TRIM32 |      |      |
| V3SVHSHC_6824492  | CTNNA2       | 5.378E-14 |           |           |           |  | CTNNA2       |        |      |      |
| V3SVHSHC_9911807  | RAPGEF5      | 6.058E-14 |           |           |           |  | RAPGEF5      |        |      |      |
| V3SVHSHC_4921250  | CHD6         | 6.099E-14 |           |           |           |  | CHD6         |        |      |      |
| V3SVHSHC_10814786 | CCDC79       | 6.183E-14 |           |           |           |  | CCDC79       |        |      |      |
| V3SVHSHC_9819143  | IRAK1        | 6.370E-14 |           |           |           |  | IRAK1        |        |      |      |
| V3SVHSHC_9786341  | SHD          | 6.553E-14 |           |           |           |  | SHD          |        |      |      |
| V3SVHSHC_5688401  | RFESD        | 6.614E-14 |           |           |           |  | RFESD        |        |      |      |
| V3SVHSHC_8192738  | PAM          | 6.784E-14 |           |           |           |  | PAM          |        |      |      |
| V3SVHSHC_7157528  | MRPS26       | 7.024E-14 |           |           |           |  | MRPS26       |        |      |      |
| V3SVHSHC_4776380  | TOR3A        | 7.270E-14 |           |           |           |  | TOR3A        |        |      |      |
| V3SVHSHC_6195380  | CSNK1G2      | 7.482E-14 |           |           |           |  | CSNK1G2      |        |      |      |
| V3SVHSHC_7301540  | GJA4         | 7.503E-14 |           |           |           |  | GJA4         |        |      |      |
| V3SVHSHC_5723810  | DRD5         | 7.521E-14 |           |           |           |  | DRD5         |        |      |      |
| V3SVHSHC_5517791  | HSF1         | 7.820E-14 |           |           |           |  | HSF1         |        |      |      |
| V3SVHSHC_9656618  | CRCP         | 7.864E-14 |           |           |           |  | CRCP         |        |      |      |
| V3SVHSHC_6615206  | NPY2R        | 7.866E-14 |           |           |           |  | NPY2R        |        |      |      |
| V3SVHSHC_9138056  | ADCK1        | 7.919E-14 |           |           |           |  | ADCK1        |        |      |      |
| V3SVHSHC_7204157  | UBE3C        | 8.034E-14 |           |           |           |  | UBE3C        |        |      |      |
| V3SVHSHC_7685627  | RCN2         | 8.552E-14 |           | 2.846E-50 | 1.571E-10 |  | RCN2         |        | RCN2 | RCN2 |
| V3SVHSHC_5049950  | PRTN3        | 8.615E-14 |           |           |           |  | PRTN3        |        |      |      |
| V3SVHSHC_5834954  | AIFM2        | 9.151E-14 |           |           |           |  | AIFM2        |        |      |      |
| V3SVHSHC_5412257  | DSCAML1      | 9.335E-14 |           |           |           |  | DSCAML1      |        |      |      |
| V3SVHSHC_8814425  | ACSM2A       | 9.807E-14 |           |           |           |  | ACSM2A       |        |      |      |
| V3SVHSHC_9492410  | NOB1         | 9.967E-14 |           |           |           |  | NOB1         |        |      |      |
| V3SVHSHC_7038266  | SBF2         | 1.026E-13 |           |           |           |  | SBF2         |        |      |      |
| V3SVHSHC_9101987  | ACVR2B       | 1.069E-13 |           |           |           |  | ACVR2B       |        |      |      |
| V3SVHSHC_5425688  | C6ORF15      | 1.072E-13 |           |           |           |  | C6ORF15      |        |      |      |
| V3SVHSHC_9863726  | GNS          | 1.073E-13 |           |           |           |  | GNS          |        |      |      |
| V3SVHSHC_5843897  | DARS         | 1.076E-13 |           |           |           |  | DARS         |        |      |      |
| V3SVHSHC_6897752  | OR10V1       | 1.090E-13 |           |           |           |  | OR10V1       |        |      |      |
| V3SVHSHC_6280322  | USP1         | 1.133E-13 |           |           |           |  | USP1         |        |      |      |
| V3SVHSHC_8481323  | ATPAF1       | 1.135E-13 |           |           |           |  | ATPAF1       |        |      |      |
| V3SVHSHC_5377013  | F3           | 1.177E-13 |           |           |           |  | F3           |        |      |      |
| V3SVHSHC_5128193  | C19ORF12     | 1.191E-13 |           |           |           |  | C19ORF12     |        |      |      |
| V3SVHSHC_7149740  | Cui9         | 1.202E-13 |           |           |           |  | Cui9         |        |      |      |
| V3SVHSHC_9328928  | NVL          | 1.230E-13 |           |           |           |  | NVL          |        |      |      |
| V3SVHSHC_10779575 | PKLR         | 1.261E-13 |           |           |           |  | PKLR         |        |      |      |
| V3SVHSHC_8689025  | TMEM191B     | 1.266E-13 |           |           |           |  | TMEM191B     |        |      |      |
| V3SVHSHC_10695128 | NCEH1        | 1.312E-13 |           |           |           |  | NCEH1        |        |      |      |
| V3SVHSHC_6225806  | UBQLNL       | 1.339E-13 |           |           |           |  | UBQLNL       |        |      |      |
| V3SVHSHC_6244451  | LOC101927562 | 1.399E-13 |           |           |           |  | LOC101927562 |        |      |      |
| V3SVHSHC_7454693  | SCN1B        | 1.420E-13 |           |           |           |  | SCN1B        |        |      |      |
| V3SVHSHC_6567719  | MYH10        | 1.469E-13 |           |           |           |  | MYH10        |        |      |      |
| V3SVHSHC_5841554  | LINC00684    | 1.475E-13 |           |           |           |  | LINC00684    |        |      |      |
| V3SVHSHC_9000446  | RICTOR       | 1.510E-13 |           |           |           |  | RICTOR       |        |      |      |
| V3SVHSHC_10637345 | INSR         | 1.555E-13 |           |           |           |  | INSR         |        |      |      |
| V3SVHSHC_10330841 | CDR2         | 1.667E-13 | 9.296E-12 |           |           |  | CDR2         | CDR2   |      |      |
| V3SVHSHC_4822151  | APOC4        | 1.697E-13 |           |           |           |  | APOC4        |        |      |      |
| V3SVHSHC_8846303  | MAL2         | 1.699E-13 |           |           |           |  | MAL2         |        |      |      |
| V3SVHSHC_4801031  | CAPN1        | 1.751E-13 |           |           |           |  | CAPN1        |        |      |      |
| V3SVHSHC_10230917 | CHML         | 1.761E-13 |           |           |           |  | CHML         |        |      |      |
| V3SVHSHC_8881844  | CYB561D1     | 1.776E-13 |           |           |           |  | CYB561D1     |        |      |      |
| V3SVHSHC_7417436  | FNDC9        | 1.813E-13 |           |           |           |  | FNDC9        |        |      |      |

|                   |              |           |           |           |  |  |              |          |         |  |
|-------------------|--------------|-----------|-----------|-----------|--|--|--------------|----------|---------|--|
| V3SVHSHC_9233657  | OR4C16       | 1.830E-13 |           |           |  |  | OR4C16       |          |         |  |
| V3SVHSHC_5732126  | NR5A1        | 1.881E-13 |           |           |  |  | NR5A1        |          |         |  |
| V3SVHSHC_8851979  | WFIKKN2      | 1.898E-13 |           |           |  |  | WFIKKN2      |          |         |  |
| V3SVHSHC_5765720  | GSS          | 1.972E-13 |           |           |  |  | GSS          |          |         |  |
| V3SVHSHC_6134891  | ITGAD        | 2.017E-13 |           |           |  |  | ITGAD        |          |         |  |
| V3SVHSHC_7586561  | SLC22A2      | 2.038E-13 |           |           |  |  | SLC22A2      |          |         |  |
| V3SVHSHC_9484457  | UBE2N        | 2.113E-13 |           |           |  |  | UBE2N        |          |         |  |
| V3SVHSHC_8451062  | SPDL1        | 2.131E-13 |           |           |  |  | SPDL1        |          |         |  |
| V3SVHSHC_10038560 | SPATA22      | 2.133E-13 |           |           |  |  | SPATA22      |          |         |  |
| V3SVHSHC_8167031  | CFDP1        | 2.159E-13 |           |           |  |  | CFDP1        |          |         |  |
| V3SVHSHC_6824294  | NDUFS3       | 2.162E-13 |           |           |  |  | NDUFS3       |          |         |  |
| V3SVHSHC_10734332 | PDHB         | 2.174E-13 |           |           |  |  | PDHB         |          |         |  |
| V3SVHSHC_8538380  | LGSN         | 2.184E-13 |           |           |  |  | LGSN         |          |         |  |
| V3SVHSHC_10850294 | TSPAN2       | 2.235E-13 |           | 1.184E-29 |  |  | TSPAN2       |          | TSPAN2  |  |
| V3SVHSHC_6178187  | SCAF11       | 2.252E-13 |           |           |  |  | SCAF11       |          |         |  |
| V3SVHSHC_6470666  | NAGS         | 2.333E-13 |           |           |  |  | NAGS         |          |         |  |
| V3SVHSHC_5993123  | DENND6B      | 2.391E-13 |           |           |  |  | DENND6B      |          |         |  |
| V3SVHSHC_8120897  | DLX3         | 2.432E-13 |           |           |  |  | DLX3         |          |         |  |
| V3SVHSHC_9420998  | PPP1R7       | 2.761E-13 |           |           |  |  | PPP1R7       |          |         |  |
| V3SVHSHC_4745294  | SMIM15       | 2.771E-13 |           |           |  |  | SMIM15       |          |         |  |
| V3SVHSHC_5457995  | FKBP14       | 2.813E-13 |           |           |  |  | FKBP14       |          |         |  |
| V3SVHSHC_7952234  | OR10H1       | 2.837E-13 |           |           |  |  | OR10H1       |          |         |  |
| V3SVHSHC_6026882  | SLC37A2      | 3.014E-13 |           | 3.565E-11 |  |  | SLC37A2      |          | SLC37A2 |  |
| V3SVHSHC_8835116  | NDUFA4L2     | 3.111E-13 | 1.679E-09 |           |  |  | NDUFA4L2     | NDUFA4L2 |         |  |
| V3SVHSHC_9556727  | FOXR2        | 3.149E-13 |           |           |  |  | FOXR2        |          |         |  |
| V3SVHSHC_6166967  | SLC7A14      | 3.236E-13 |           |           |  |  | SLC7A14      |          |         |  |
| V3SVHSHC_8423870  | IVL          | 3.364E-13 |           |           |  |  | IVL          |          |         |  |
| V3SVHSHC_9391265  | LOC100996707 | 3.453E-13 |           |           |  |  | LOC100996707 |          |         |  |
| V3SVHSHC_5991044  | HMGN2        | 3.599E-13 |           |           |  |  | HMGN2        |          |         |  |
| V3SVHSHC_5504987  | CCL24        | 3.727E-13 |           |           |  |  | CCL24        |          |         |  |
| V3SVHSHC_7197161  | PTPN3        | 3.738E-13 |           |           |  |  | PTPN3        |          |         |  |
| V3SVHSHC_10590716 | HIST1H1C     | 3.824E-13 |           |           |  |  | HIST1H1C     |          |         |  |
| V3SVHSHC_5465915  | NDST2        | 4.043E-13 |           |           |  |  | NDST2        |          |         |  |
| V3SVHSHC_10804226 | AMN1         | 4.547E-13 |           |           |  |  | AMN1         |          |         |  |
| V3SVHSHC_4783508  | LYZ          | 4.633E-13 |           |           |  |  | LYZ          |          |         |  |
| V3SVHSHC_7780007  | BMP6         | 4.832E-13 |           |           |  |  | BMP6         |          |         |  |
| V3SVHSHC_4929632  | EPHX3        | 4.880E-13 |           |           |  |  | EPHX3        |          |         |  |
| V3SVHSHC_10512242 | PMP22        | 4.924E-13 |           |           |  |  | PMP22        |          |         |  |
| V3SVHSHC_6742784  | AXDND1       | 5.041E-13 |           |           |  |  | AXDND1       |          |         |  |
| V3SVHSHC_7634015  | ABCG2        | 5.112E-13 |           |           |  |  | ABCG2        |          |         |  |
| V3SVHSHC_10587383 | FOXO3        | 5.172E-13 |           |           |  |  | FOXO3        |          |         |  |
| V3SVHSHC_7832246  | KCNAB3       | 5.174E-13 |           |           |  |  | KCNAB3       |          |         |  |
| V3SVHSHC_7228280  | GRIA4        | 5.219E-13 |           | 2.529E-29 |  |  | GRIA4        |          | GRIA4   |  |
| V3SVHSHC_7904087  | DEFB104A     | 5.233E-13 |           |           |  |  | DEFB104A     |          |         |  |
| V3SVHSHC_8362853  | MCOLN2       | 5.249E-13 |           |           |  |  | MCOLN2       |          |         |  |
| V3SVHSHC_8267384  | DDX47        | 5.252E-13 |           |           |  |  | DDX47        |          |         |  |
| V3SVHSHC_8972264  | VPS41        | 5.281E-13 |           |           |  |  | VPS41        |          |         |  |
| V3SVHSHC_7014902  | ARHGAP15     | 5.292E-13 |           |           |  |  | ARHGAP15     |          |         |  |
| V3SVHSHC_7075061  | ING1         | 5.482E-13 |           |           |  |  | ING1         |          |         |  |
| V3SVHSHC_6496571  | TOMM6        | 5.754E-13 |           |           |  |  | TOMM6        |          |         |  |
| V3SVHSHC_9270584  | OMA1         | 5.791E-13 |           |           |  |  | OMA1         |          |         |  |
| V3SVHSHC_9081263  | CCDC92       | 5.815E-13 |           |           |  |  | CCDC92       |          |         |  |
| V3SVHSHC_9011864  | CCNG2        | 5.949E-13 |           |           |  |  | CCNG2        |          |         |  |
| V3SVHSHC_9101591  | DIAPH3       | 6.007E-13 |           |           |  |  | DIAPH3       |          |         |  |

|                   |          |           |           |           |           |  |          |      |        |       |
|-------------------|----------|-----------|-----------|-----------|-----------|--|----------|------|--------|-------|
| V3SVHSHC_9452711  | CHRFAM7A | 6.062E-13 |           |           |           |  | CHRFAM7A |      |        |       |
| V3SVHSHC_9482246  | KIR3DL1  | 6.144E-13 |           |           |           |  | KIR3DL1  |      |        |       |
| V3SVHSHC_9605072  | B4GALT1  | 6.326E-13 |           |           |           |  | B4GALT1  |      |        |       |
| V3SVHSHC_6965138  | ZNF555   | 6.390E-13 |           | 1.043E-10 |           |  | ZNF555   |      | ZNF555 |       |
| V3SVHSHC_5820335  | AP2B1    | 6.589E-13 |           |           |           |  | AP2B1    |      |        |       |
| V3SVHSHC_6143075  | FITM1    | 6.598E-13 |           |           |           |  | FITM1    |      |        |       |
| V3SVHSHC_10722848 | SPATA33  | 6.702E-13 |           |           |           |  | SPATA33  |      |        |       |
| V3SVHSHC_9620285  | BAZ1B    | 6.710E-13 |           |           |           |  | BAZ1B    |      |        |       |
| V3SVHSHC_7420175  | PTPN13   | 6.717E-13 |           |           |           |  | PTPN13   |      |        |       |
| V3SVHSHC_8606789  | NPAS1    | 6.735E-13 |           |           |           |  | NPAS1    |      |        |       |
| V3SVHSHC_6895046  | MCM5     | 6.828E-13 |           |           | 2.141E-04 |  | MCM5     |      |        | MCM5  |
| V3SVHSHC_5959463  | GRIN3A   | 7.045E-13 |           |           |           |  | GRIN3A   |      |        |       |
| V3SVHSHC_7471688  | ARF5     | 7.384E-13 |           |           |           |  | ARF5     |      |        |       |
| V3SVHSHC_9932894  | FAM69C   | 7.464E-13 |           |           |           |  | FAM69C   |      |        |       |
| V3SVHSHC_7823006  | Tti2     | 7.476E-13 | 1.561E-12 |           |           |  | Tti2     | Tti2 |        |       |
| V3SVHSHC_8643221  | OSCP1    | 7.802E-13 |           |           |           |  | OSCP1    |      |        |       |
| V3SVHSHC_7551119  | HTR1D    | 7.842E-13 |           |           |           |  | HTR1D    |      |        |       |
| V3SVHSHC_10263884 | OR8G2    | 7.884E-13 |           |           |           |  | OR8G2    |      |        |       |
| V3SVHSHC_9701267  | IL34     | 8.127E-13 |           |           |           |  | IL34     |      |        |       |
| V3SVHSHC_6090077  | GABPB1   | 8.144E-13 |           |           |           |  | GABPB1   |      |        |       |
| V3SVHSHC_5154164  | PDE10A   | 8.246E-13 |           |           |           |  | PDE10A   |      |        |       |
| V3SVHSHC_7852772  | MCMBP    | 8.570E-13 |           |           |           |  | MCMBP    |      |        |       |
| V3SVHSHC_4650188  | ATP1B4   | 9.191E-13 |           |           |           |  | ATP1B4   |      |        |       |
| V3SVHSHC_9054929  | ASTN2    | 9.286E-13 |           |           |           |  | ASTN2    |      |        |       |
| V3SVHSHC_6163964  | CYP2A7   | 9.608E-13 |           |           |           |  | CYP2A7   |      |        |       |
| V3SVHSHC_8570093  | MYLPF    | 9.667E-13 |           |           |           |  | MYLPF    |      |        |       |
| V3SVHSHC_6938474  | PITPNB   | 9.769E-13 |           |           |           |  | PITPNB   |      |        |       |
| V3SVHSHC_6331307  | HCN1     | 1.004E-12 |           |           |           |  | HCN1     |      |        |       |
| V3SVHSHC_7594118  | CCNB2    | 1.009E-12 |           |           |           |  | CCNB2    |      |        |       |
| V3SVHSHC_10688528 | LAMC3    | 1.012E-12 |           |           |           |  | LAMC3    |      |        |       |
| V3SVHSHC_4940654  | ZNF517   | 1.026E-12 |           |           |           |  | ZNF517   |      |        |       |
| V3SVHSHC_10526366 | AGMAT    | 1.040E-12 |           |           |           |  | AGMAT    |      |        |       |
| V3SVHSHC_7905935  | ZNF585B  | 1.054E-12 |           |           |           |  | ZNF585B  |      |        |       |
| V3SVHSHC_7015793  | RCN2     | 1.091E-12 |           |           |           |  | RCN2     |      |        |       |
| V3SVHSHC_7361435  | PRDM15   | 1.102E-12 |           |           |           |  | PRDM15   |      |        |       |
| V3SVHSHC_5511323  | ZBTB20   | 1.110E-12 |           | 5.343E-23 |           |  | ZBTB20   |      | ZBTB20 |       |
| V3SVHSHC_10004405 | ESYT3    | 1.222E-12 |           |           | 3.485E-07 |  | ESYT3    |      |        | ESYT3 |
| V3SVHSHC_8726084  | ZNF607   | 1.301E-12 |           |           |           |  | ZNF607   |      |        |       |
| V3SVHSHC_5808323  | OR9G1    | 1.326E-12 |           |           |           |  | OR9G1    |      |        |       |
| V3SVHSHC_7337378  | CT45A2   | 1.338E-12 |           |           |           |  | CT45A2   |      |        |       |
| V3SVHSHC_9128024  | AIG1     | 1.380E-12 |           |           |           |  | AIG1     |      |        |       |
| V3SVHSHC_6743081  | FNIP2    | 1.407E-12 |           |           |           |  | FNIP2    |      |        |       |
| V3SVHSHC_10390967 | FCAMR    | 1.420E-12 |           |           |           |  | FCAMR    |      |        |       |
| V3SVHSHC_7054337  | RFPL2    | 1.454E-12 |           |           |           |  | RFPL2    |      |        |       |
| V3SVHSHC_8138981  | NOXA1    | 1.463E-12 |           |           |           |  | NOXA1    |      |        |       |
| V3SVHSHC_5415656  | NCCRP1   | 1.473E-12 |           |           |           |  | NCCRP1   |      |        |       |
| V3SVHSHC_9105353  | DYNLRB2  | 1.528E-12 |           |           |           |  | DYNLRB2  |      |        |       |
| V3SVHSHC_10160858 | PVRL2    | 1.558E-12 |           |           |           |  | PVRL2    |      |        |       |
| V3SVHSHC_7796210  | PDE1A    | 1.560E-12 |           |           |           |  | PDE1A    |      |        |       |
| V3SVHSHC_6263129  | CYB5R4   | 1.622E-12 |           |           |           |  | CYB5R4   |      |        |       |
| V3SVHSHC_9792974  | TAS2R60  | 1.625E-12 |           |           |           |  | TAS2R60  |      |        |       |
| V3SVHSHC_9792314  | KRTAP5-6 | 1.670E-12 |           |           |           |  | KRTAP5-6 |      |        |       |
| V3SVHSHC_6788489  | DEFB4B   | 1.692E-12 |           |           |           |  | DEFB4B   |      |        |       |
| V3SVHSHC_6382589  | ACBD4    | 1.721E-12 |           |           |           |  | ACBD4    |      |        |       |
| V3SVHSHC_5439119  | WBP2     | 1.746E-12 |           |           |           |  | WBP2     |      |        |       |

|                   |              |           |           |           |           |  |              |        |        |        |
|-------------------|--------------|-----------|-----------|-----------|-----------|--|--------------|--------|--------|--------|
| V3SVHSHC_9381398  | PCDH19       | 1.746E-12 | 1.043E-04 | 5.146E-12 | 3.454E-02 |  | PCDH19       | PCDH19 | PCDH19 |        |
| V3SVHSHC_6420242  | KIAA0408     | 1.751E-12 |           |           |           |  | KIAA0408     |        |        |        |
| V3SVHSHC_8480267  | SLC37A3      | 1.764E-12 |           |           |           |  | SLC37A3      |        |        |        |
| V3SVHSHC_9885902  | PLA2G1B      | 1.784E-12 |           |           |           |  | PLA2G1B      |        |        |        |
| V3SVHSHC_8723312  | TAC1         | 1.802E-12 |           |           |           |  | TAC1         |        |        |        |
| V3SVHSHC_8853167  | SLC9B1       | 1.849E-12 |           |           |           |  | SLC9B1       |        |        |        |
| V3SVHSHC_5934614  | STK17B       | 1.864E-12 | 1.729E-11 | 3.915E-36 | 1.344E-22 |  | STK17B       | STK17B | STK17B | STK17B |
| V3SVHSHC_6744500  | DIP2B        | 1.897E-12 |           |           |           |  | DIP2B        |        |        |        |
| V3SVHSHC_4735658  | CDK11A       | 1.903E-12 |           |           |           |  | CDK11A       |        |        |        |
| V3SVHSHC_4829675  | ZNF230       | 1.962E-12 |           |           |           |  | ZNF230       |        |        |        |
| V3SVHSHC_8529107  | DCDC5        | 2.045E-12 |           |           |           |  | DCDC5        |        |        |        |
| V3SVHSHC_6834788  | DCPS         | 2.059E-12 |           |           |           |  | DCPS         |        |        |        |
| V3SVHSHC_9931211  | LOC100294033 | 2.060E-12 |           |           |           |  | LOC100294033 |        |        |        |
| V3SVHSHC_8359553  | PEX11G       | 2.073E-12 | 9.856E-17 |           |           |  | PEX11G       | PEX11G |        |        |
| V3SVHSHC_8864882  | Dpy30        | 2.097E-12 |           |           |           |  | Dpy30        |        |        |        |
| V3SVHSHC_8724467  | TGM3         | 2.100E-12 |           | 2.420E-41 | 1.309E-01 |  | TGM3         |        | TGM3   |        |
| V3SVHSHC_10206464 | TMCO2        | 2.107E-12 |           |           |           |  | TMCO2        |        |        |        |
| V3SVHSHC_7949198  | HJURP        | 2.226E-12 |           |           |           |  | HJURP        |        |        |        |
| V3SVHSHC_4943690  | CDK2         | 2.313E-12 |           |           |           |  | CDK2         |        |        |        |
| V3SVHSHC_9168119  | ADH4         | 2.343E-12 |           |           |           |  | ADH4         |        |        |        |
| V3SVHSHC_9759809  | NAA38        | 2.410E-12 |           |           |           |  | NAA38        |        |        |        |
| V3SVHSHC_9185609  | TRIM10       | 2.458E-12 | 2.999E-03 |           |           |  | TRIM10       |        |        |        |
| V3SVHSHC_6272336  | FAM26E       | 2.516E-12 |           |           | 4.630E-01 |  | FAM26E       |        |        |        |
| V3SVHSHC_5590325  | EPHB6        | 2.577E-12 |           |           |           |  | EPHB6        |        |        |        |
| V3SVHSHC_5118722  | NECAB2       | 2.667E-12 | 4.263E-13 |           |           |  | NECAB2       | NECAB2 |        |        |
| V3SVHSHC_8164622  | ATP1B4       | 2.669E-12 |           |           |           |  | ATP1B4       |        |        |        |
| V3SVHSHC_7308206  | ZNF583       | 2.694E-12 |           |           |           |  | ZNF583       |        |        |        |
| V3SVHSHC_7856072  | LOC100133128 | 2.741E-12 |           |           |           |  | LOC100133128 |        |        |        |
| V3SVHSHC_8717768  | CCL24        | 2.764E-12 |           |           |           |  | CCL24        |        |        |        |
| V3SVHSHC_8758556  | SPACA4       | 2.806E-12 |           |           |           |  | SPACA4       |        |        |        |
| V3SVHSHC_6337247  | LRRN2        | 2.822E-12 |           |           |           |  | LRRN2        |        |        |        |
| V3SVHSHC_8599529  | MECOM        | 2.886E-12 |           |           |           |  | MECOM        |        |        |        |
| V3SVHSHC_10824488 | IL31RA       | 2.992E-12 |           |           |           |  | IL31RA       |        |        |        |
| V3SVHSHC_9254348  | LBP          | 3.027E-12 |           | 1.699E-02 |           |  | LBP          |        |        |        |
| V3SVHSHC_6236201  | AGA          | 3.116E-12 |           |           |           |  | AGA          |        |        |        |
| V3SVHSHC_7268045  | ZCCHC10      | 3.127E-12 |           |           |           |  | ZCCHC10      |        |        |        |
| V3SVHSHC_6897521  | CRCP         | 3.216E-12 |           |           |           |  | CRCP         |        |        |        |
| V3SVHSHC_10570685 | C9orf92      | 3.285E-12 |           |           |           |  | C9orf92      |        |        |        |
| V3SVHSHC_8516006  | OR4K5        | 3.454E-12 |           |           |           |  | OR4K5        |        |        |        |
| V3SVHSHC_7056911  | TRIB1        | 3.558E-12 |           |           |           |  | TRIB1        |        |        |        |
| V3SVHSHC_8747963  | PBX1         | 3.574E-12 |           |           |           |  | PBX1         |        |        |        |
| V3SVHSHC_8325101  | SQLE         | 3.645E-12 |           |           |           |  | SQLE         |        |        |        |
| V3SVHSHC_10161815 | PPM1J        | 3.648E-12 |           |           | 3.676E-01 |  | PPM1J        |        |        |        |
| V3SVHSHC_8068955  | GMEB2        | 3.664E-12 |           | 4.702E-05 |           |  | GMEB2        |        | GMEB2  |        |
| V3SVHSHC_8913029  | GRXCR2       | 3.740E-12 |           |           |           |  | GRXCR2       |        |        |        |
| V3SVHSHC_9795350  | PROZ         | 3.802E-12 |           |           |           |  | PROZ         |        |        |        |
| V3SVHSHC_4993190  | CA3          | 4.069E-12 |           |           |           |  | CA3          |        |        |        |
| V3SVHSHC_8564912  | MBLAC2       | 4.185E-12 |           | 5.780E-09 |           |  | MBLAC2       |        | MBLAC2 |        |
| V3SVHSHC_9327905  | SCML1        | 4.249E-12 |           |           |           |  | SCML1        |        |        |        |
| V3SVHSHC_8457299  | LGI2         | 4.496E-12 |           |           |           |  | LGI2         |        |        |        |
| V3SVHSHC_4845119  | FRS3         | 4.514E-12 |           |           |           |  | FRS3         |        |        |        |
| V3SVHSHC_5204390  | PI16         | 4.532E-12 |           |           |           |  | PI16         |        |        |        |
| V3SVHSHC_4833206  | PLA2G2E      | 4.797E-12 |           |           |           |  | PLA2G2E      |        |        |        |
| V3SVHSHC_10541183 | SSMEM1       | 4.804E-12 |           |           |           |  | SSMEM1       |        |        |        |

|                   |              |           |           |           |           |  |              |        |  |  |
|-------------------|--------------|-----------|-----------|-----------|-----------|--|--------------|--------|--|--|
| V3SVHSHC_5919104  | SLC38A11     | 4.876E-12 |           |           |           |  | SLC38A11     |        |  |  |
| V3SVHSHC_8619593  | PPARA        | 4.894E-12 |           |           |           |  | PPARA        |        |  |  |
| V3SVHSHC_7812842  | CHIC2        | 4.997E-12 |           |           |           |  | CHIC2        |        |  |  |
| V3SVHSHC_5363978  | NFATC2IP     | 5.318E-12 |           |           |           |  | NFATC2IP     |        |  |  |
| V3SVHSHC_10168481 | ZNF727P      | 5.319E-12 |           |           |           |  | ZNF727P      |        |  |  |
| V3SVHSHC_5017148  | MCEE         | 5.567E-12 |           |           |           |  | MCEE         |        |  |  |
| V3SVHSHC_9601541  | DIABLO       | 5.617E-12 |           |           |           |  | DIABLO       |        |  |  |
| V3SVHSHC_8165282  | LOC101929578 | 5.672E-12 |           |           |           |  | LOC101929578 |        |  |  |
| V3SVHSHC_5141525  | SPAG17       | 5.935E-12 |           |           |           |  | SPAG17       |        |  |  |
| V3SVHSHC_7837592  | HOXC13       | 6.245E-12 |           |           |           |  | HOXC13       |        |  |  |
| V3SVHSHC_9388526  | CLTA         | 6.250E-12 |           |           |           |  | CLTA         |        |  |  |
| V3SVHSHC_9505907  | FOXK1        | 6.477E-12 |           |           |           |  | FOXK1        |        |  |  |
| V3SVHSHC_9218774  | ELF1         | 6.567E-12 |           |           |           |  | ELF1         |        |  |  |
| V3SVHSHC_8698496  | TLR6         | 6.574E-12 | 4.312E-08 |           |           |  | TLR6         | TLR6   |  |  |
| V3SVHSHC_10006550 | TLR5         | 6.783E-12 |           |           |           |  | TLR5         |        |  |  |
| V3SVHSHC_7661636  | UQCC2        | 7.020E-12 |           |           |           |  | UQCC2        |        |  |  |
| V3SVHSHC_6600587  | FMO5         | 7.258E-12 |           |           |           |  | FMO5         |        |  |  |
| V3SVHSHC_6920489  | MUTYH        | 7.441E-12 |           |           |           |  | MUTYH        |        |  |  |
| V3SVHSHC_7429217  | MICA         | 7.781E-12 |           |           |           |  | MICA         |        |  |  |
| V3SVHSHC_8104100  | UBTFL1       | 7.797E-12 |           |           |           |  | UBTFL1       |        |  |  |
| V3SVHSHC_9150926  | ADAM15       | 8.119E-12 |           |           |           |  | ADAM15       |        |  |  |
| V3SVHSHC_5116643  | TSHZ3        | 8.122E-12 |           |           |           |  | TSHZ3        |        |  |  |
| V3SVHSHC_6721070  | CYB5D2       | 8.345E-12 |           |           |           |  | CYB5D2       |        |  |  |
| V3SVHSHC_8508713  | DIS3L2       | 8.537E-12 |           |           |           |  | DIS3L2       |        |  |  |
| V3SVHSHC_8614676  | PEX7         | 8.812E-12 |           |           |           |  | PEX7         |        |  |  |
| V3SVHSHC_5184788  | NYNRIN       | 9.357E-12 |           |           |           |  | NYNRIN       |        |  |  |
| V3SVHSHC_9933257  | BMP2         | 9.917E-12 |           |           |           |  | BMP2         |        |  |  |
| V3SVHSHC_9105089  | CIRBP        | 9.998E-12 |           |           |           |  | CIRBP        |        |  |  |
| V3SVHSHC_10368494 | MTNR1B       | 1.038E-11 | 4.312E-14 |           |           |  | MTNR1B       | MTNR1B |  |  |
| V3SVHSHC_10524353 | FAT2         | 1.040E-11 |           |           |           |  | FAT2         |        |  |  |
| V3SVHSHC_7194224  | GBP2         | 1.051E-11 |           |           |           |  | GBP2         |        |  |  |
| V3SVHSHC_5169707  | TMTC3        | 1.074E-11 |           |           |           |  | TMTC3        |        |  |  |
| V3SVHSHC_7313420  | OR5D18       | 1.082E-11 |           |           |           |  | OR5D18       |        |  |  |
| V3SVHSHC_9042455  | ERO1LB       | 1.155E-11 |           |           |           |  | ERO1LB       |        |  |  |
| V3SVHSHC_5341340  | NCBP2        | 1.170E-11 |           |           |           |  | NCBP2        |        |  |  |
| V3SVHSHC_6649790  | MYH9         | 1.191E-11 |           |           |           |  | MYH9         |        |  |  |
| V3SVHSHC_9653714  | ATP10A       | 1.211E-11 |           |           |           |  | ATP10A       |        |  |  |
| V3SVHSHC_10400537 | ERCC5        | 1.222E-11 |           |           |           |  | ERCC5        |        |  |  |
| V3SVHSHC_5644841  | WAS          | 1.232E-11 |           |           |           |  | WAS          |        |  |  |
| V3SVHSHC_10641437 | CSF1         | 1.270E-11 |           | 2.265E-01 | 3.802E-01 |  | CSF1         |        |  |  |
| V3SVHSHC_8439644  | PTPN20B      | 1.296E-11 |           |           |           |  | PTPN20B      |        |  |  |
| V3SVHSHC_8486174  | PAFAH2       | 1.309E-11 |           |           |           |  | PAFAH2       |        |  |  |
| V3SVHSHC_8882075  | SNED1        | 1.349E-11 |           |           |           |  | SNED1        |        |  |  |
| V3SVHSHC_9066116  | ZNF19        | 1.386E-11 |           |           |           |  | ZNF19        |        |  |  |
| V3SVHSHC_5663387  | ACTC1        | 1.435E-11 |           |           |           |  | ACTC1        |        |  |  |
| V3SVHSHC_10208939 | DGKI         | 1.464E-11 |           | 3.824E-12 |           |  | DGKI         | DGKI   |  |  |
| V3SVHSHC_9805547  | PAK4         | 1.477E-11 |           |           |           |  | PAK4         |        |  |  |
| V3SVHSHC_7213925  | Pbrm1        | 1.508E-11 |           |           |           |  | Pbrm1        |        |  |  |
| V3SVHSHC_5632763  | Iqcf5        | 1.514E-11 |           |           |           |  | Iqcf5        |        |  |  |
| V3SVHSHC_8253227  | TMED7        | 1.548E-11 |           |           |           |  | TMED7        |        |  |  |
| V3SVHSHC_8648072  | LACTB        | 1.580E-11 |           |           |           |  | LACTB        |        |  |  |
| V3SVHSHC_7444397  | LTK          | 1.631E-11 |           |           |           |  | LTK          |        |  |  |
| V3SVHSHC_5785223  | OASL         | 1.641E-11 |           |           |           |  | OASL         |        |  |  |

|                   |              |           |           |  |  |  |              |              |  |  |
|-------------------|--------------|-----------|-----------|--|--|--|--------------|--------------|--|--|
| V3SVHSHC_5226104  | LOC101928291 | 1.692E-11 | 9.056E-05 |  |  |  | LOC101928291 | LOC101928291 |  |  |
| V3SVHSHC_7038992  | ISL2         | 1.697E-11 |           |  |  |  | ISL2         |              |  |  |
| V3SVHSHC_9498977  | SLC10A4      | 1.715E-11 |           |  |  |  | SLC10A4      |              |  |  |
| V3SVHSHC_5865446  | FAM101B      | 1.740E-11 |           |  |  |  | FAM101B      |              |  |  |
| V3SVHSHC_7733510  | WDR78        | 1.747E-11 |           |  |  |  | WDR78        |              |  |  |
| V3SVHSHC_8722388  | POMGNT1      | 1.784E-11 |           |  |  |  | POMGNT1      |              |  |  |
| V3SVHSHC_7945403  | CLDN6        | 1.816E-11 |           |  |  |  | CLDN6        |              |  |  |
| V3SVHSHC_9981470  | ZNF565       | 1.951E-11 |           |  |  |  | ZNF565       |              |  |  |
| V3SVHSHC_5122583  | PLEKHH2      | 2.024E-11 |           |  |  |  | PLEKHH2      |              |  |  |
| V3SVHSHC_5104565  | ZFYVE20      | 2.030E-11 |           |  |  |  | ZFYVE20      |              |  |  |
| V3SVHSHC_8323121  | SLC35B3      | 2.090E-11 |           |  |  |  | SLC35B3      |              |  |  |
| V3SVHSHC_5828024  | FAM175A      | 2.177E-11 |           |  |  |  | FAM175A      |              |  |  |
| V3SVHSHC_8952365  | HEATR5B      | 2.272E-11 |           |  |  |  | HEATR5B      |              |  |  |
| V3SVHSHC_7036682  | PRDM8        | 2.369E-11 |           |  |  |  | PRDM8        |              |  |  |
| V3SVHSHC_4987019  | PRR11        | 2.375E-11 |           |  |  |  | PRR11        |              |  |  |
| V3SVHSHC_6399650  | KCNH3        | 2.497E-11 |           |  |  |  | KCNH3        |              |  |  |
| V3SVHSHC_7440074  | TRABD2B      | 2.592E-11 |           |  |  |  | TRABD2B      |              |  |  |
| V3SVHSHC_8087072  | ZNF436       | 2.597E-11 |           |  |  |  | ZNF436       |              |  |  |
| V3SVHSHC_8581049  | P2RY14       | 2.628E-11 |           |  |  |  | P2RY14       |              |  |  |
| V3SVHSHC_10703378 | GOLGA5       | 2.648E-11 |           |  |  |  | GOLGA5       |              |  |  |
| V3SVHSHC_7578740  | LDHA         | 2.650E-11 |           |  |  |  | LDHA         |              |  |  |
| V3SVHSHC_7937351  | EDDM3B       | 2.718E-11 |           |  |  |  | EDDM3B       |              |  |  |
| V3SVHSHC_5537327  | ADRBK1       | 2.810E-11 |           |  |  |  | ADRBK1       |              |  |  |
| V3SVHSHC_9493961  | RGAG1        | 2.828E-11 |           |  |  |  | RGAG1        |              |  |  |
| V3SVHSHC_6355265  | INHBB        | 2.880E-11 |           |  |  |  | INHBB        |              |  |  |
| V3SVHSHC_7322462  | ARHGAP44     | 2.910E-11 |           |  |  |  | ARHGAP44     |              |  |  |
| V3SVHSHC_9211052  | RFPL4AL1     | 2.962E-11 | 6.879E-02 |  |  |  | RFPL4AL1     |              |  |  |
| V3SVHSHC_6944612  | CCL13        | 2.975E-11 |           |  |  |  | CCL13        |              |  |  |
| V3SVHSHC_7373777  | SMCO4        | 2.981E-11 |           |  |  |  | SMCO4        |              |  |  |
| V3SVHSHC_8477891  | OR10A6       | 2.996E-11 |           |  |  |  | OR10A6       |              |  |  |
| V3SVHSHC_4923659  | SHANK1       | 3.166E-11 |           |  |  |  | SHANK1       |              |  |  |
| V3SVHSHC_9183926  | FBXO31       | 3.169E-11 |           |  |  |  | FBXO31       |              |  |  |
| V3SVHSHC_8444660  | KIAA0947     | 3.283E-11 |           |  |  |  | KIAA0947     |              |  |  |
| V3SVHSHC_10756607 | PANX1        | 3.340E-11 |           |  |  |  | PANX1        |              |  |  |
| V3SVHSHC_4923758  | LRRC4        | 3.366E-11 |           |  |  |  | LRRC4        |              |  |  |
| V3SVHSHC_5833733  | TNK1         | 3.441E-11 |           |  |  |  | TNK1         |              |  |  |
| V3SVHSHC_7738658  | SUN2         | 3.541E-11 |           |  |  |  | SUN2         |              |  |  |
| V3SVHSHC_9154853  | AURKC        | 3.644E-11 |           |  |  |  | AURKC        |              |  |  |
| V3SVHSHC_10284113 | NGDN         | 3.652E-11 |           |  |  |  | NGDN         |              |  |  |
| V3SVHSHC_7816934  | TIMM44       | 3.655E-11 |           |  |  |  | TIMM44       |              |  |  |
| V3SVHSHC_5102651  | HK3          | 3.761E-11 |           |  |  |  | HK3          |              |  |  |
| V3SVHSHC_7328996  | ZNF445       | 3.871E-11 |           |  |  |  | ZNF445       |              |  |  |
| V3SVHSHC_6375230  | VPREB1       | 3.932E-11 |           |  |  |  | VPREB1       |              |  |  |
| V3SVHSHC_7355066  | LTBP2        | 3.936E-11 |           |  |  |  | LTBP2        |              |  |  |
| V3SVHSHC_8499737  | ING5         | 3.972E-11 |           |  |  |  | ING5         |              |  |  |
| V3SVHSHC_8015759  | OR10H1       | 4.011E-11 |           |  |  |  | OR10H1       |              |  |  |
| V3SVHSHC_6824261  | CSRNP3       | 4.065E-11 |           |  |  |  | CSRNP3       |              |  |  |
| V3SVHSHC_5642036  | HTN3         | 4.089E-11 |           |  |  |  | HTN3         |              |  |  |
| V3SVHSHC_7354637  | BRINP1       | 4.162E-11 |           |  |  |  | BRINP1       |              |  |  |
| V3SVHSHC_5062622  | PFKFB1       | 4.207E-11 |           |  |  |  | PFKFB1       |              |  |  |
| V3SVHSHC_6331274  | FAM50B       | 4.346E-11 |           |  |  |  | FAM50B       |              |  |  |
| V3SVHSHC_6011702  | MS4A5        | 4.494E-11 |           |  |  |  | MS4A5        |              |  |  |
| V3SVHSHC_6501653  | SLTM         | 4.537E-11 |           |  |  |  | SLTM         |              |  |  |
| V3SVHSHC_5979956  | GPT2         | 4.571E-11 |           |  |  |  | GPT2         |              |  |  |

|                   |                |           |  |           |           |  |                |  |              |      |
|-------------------|----------------|-----------|--|-----------|-----------|--|----------------|--|--------------|------|
| V3SVHSHC_9223592  | UNC119         | 4.592E-11 |  |           |           |  | UNC119         |  |              |      |
| V3SVHSHC_5982629  | C15orf48       | 4.610E-11 |  |           |           |  | C15orf48       |  |              |      |
| V3SVHSHC_9117365  | CCK            | 4.611E-11 |  |           |           |  | CCK            |  |              |      |
| V3SVHSHC_10017077 | MDK            | 5.022E-11 |  |           |           |  | MDK            |  |              |      |
| V3SVHSHC_7721069  | TSFM           | 5.036E-11 |  |           | 7.268E-20 |  | TSFM           |  |              | TSFM |
| V3SVHSHC_9312824  | C14ORF166      | 5.117E-11 |  |           |           |  | C14ORF166      |  |              |      |
| V3SVHSHC_7170398  | PREX1          | 5.282E-11 |  |           |           |  | PREX1          |  |              |      |
| V3SVHSHC_7738097  | SNX1           | 5.584E-11 |  |           |           |  | SNX1           |  |              |      |
| V3SVHSHC_5209043  | HEY2           | 5.644E-11 |  |           |           |  | HEY2           |  |              |      |
| V3SVHSHC_5845679  | FAM90A1        | 5.667E-11 |  |           |           |  | FAM90A1        |  |              |      |
| V3SVHSHC_8009093  | TRIQK          | 5.671E-11 |  |           |           |  | TRIQK          |  |              |      |
| V3SVHSHC_6492215  | NSL1           | 5.749E-11 |  |           |           |  | NSL1           |  |              |      |
| V3SVHSHC_8536499  | PI15           | 5.865E-11 |  |           |           |  | PI15           |  |              |      |
| V3SVHSHC_8126408  | TRIM60         | 5.924E-11 |  |           |           |  | TRIM60         |  |              |      |
| V3SVHSHC_5335664  | MACC1          | 6.374E-11 |  |           |           |  | MACC1          |  |              |      |
| V3SVHSHC_6726614  | Tti2           | 6.398E-11 |  |           |           |  | Tti2           |  |              |      |
| V3SVHSHC_6680480  | C1orf123       | 6.399E-11 |  |           |           |  | C1orf123       |  |              |      |
| V3SVHSHC_10298930 | DIO3           | 6.454E-11 |  |           |           |  | DIO3           |  |              |      |
| V3SVHSHC_8480333  | NPBWR2         | 6.580E-11 |  |           |           |  | NPBWR2         |  |              |      |
| V3SVHSHC_6078923  | AHSG           | 6.633E-11 |  |           |           |  | AHSG           |  |              |      |
| V3SVHSHC_8450369  | PTPN22         | 6.657E-11 |  |           |           |  | PTPN22         |  |              |      |
| V3SVHSHC_5769581  | MYO1B          | 6.714E-11 |  |           |           |  | MYO1B          |  |              |      |
| V3SVHSHC_6955469  | FSD2           | 7.087E-11 |  |           |           |  | FSD2           |  |              |      |
| V3SVHSHC_7873199  | KRT5           | 7.131E-11 |  |           |           |  | KRT5           |  |              |      |
| V3SVHSHC_5192873  | LOC646862      | 7.550E-11 |  |           |           |  | LOC646862      |  |              |      |
| V3SVHSHC_9842672  | DZANK1         | 7.579E-11 |  |           |           |  | DZANK1         |  |              |      |
| V3SVHSHC_4968605  | NPAS1          | 7.633E-11 |  |           | 3.166E-01 |  | NPAS1          |  |              |      |
| V3SVHSHC_9656552  | NEU1           | 7.782E-11 |  |           |           |  | NEU1           |  |              |      |
| V3SVHSHC_7424828  | COX19          | 8.584E-11 |  |           |           |  | COX19          |  |              |      |
| V3SVHSHC_10441490 | ACAT1          | 8.591E-11 |  |           | 1.167E-01 |  | ACAT1          |  |              |      |
| V3SVHSHC_4738859  | FERD3L         | 8.801E-11 |  |           |           |  | FERD3L         |  |              |      |
| V3SVHSHC_9805349  | KLHL33         | 8.854E-11 |  |           |           |  | KLHL33         |  |              |      |
| V3SVHSHC_5195909  | ACOT9          | 8.914E-11 |  |           |           |  | ACOT9          |  |              |      |
| V3SVHSHC_6938045  | LOC100129083   | 9.039E-11 |  | 1.226E-14 |           |  | LOC100129083   |  | LOC100129083 |      |
| V3SVHSHC_7572437  | OR4F17         | 9.169E-11 |  |           |           |  | OR4F17         |  |              |      |
| V3SVHSHC_8757302  | C20ORF85       | 9.198E-11 |  |           |           |  | C20ORF85       |  |              |      |
| V3SVHSHC_9827459  | VGf            | 9.486E-11 |  |           |           |  | VGf            |  |              |      |
| V3SVHSHC_9593093  | LEMD1          | 9.647E-11 |  |           |           |  | LEMD1          |  |              |      |
| V3SVHSHC_7429679  | VSTM2B         | 9.761E-11 |  |           |           |  | VSTM2B         |  |              |      |
| V3SVHSHC_5579138  | RTKN           | 9.763E-11 |  |           |           |  | RTKN           |  |              |      |
| V3SVHSHC_10462511 | CALCOCO2       | 9.880E-11 |  |           |           |  | CALCOCO2       |  |              |      |
| V3SVHSHC_9007970  | DDX58          | 1.096E-10 |  |           |           |  | DDX58          |  |              |      |
| V3SVHSHC_5334014  | PI4K2B         | 1.102E-10 |  |           |           |  | PI4K2B         |  |              |      |
| V3SVHSHC_5646392  | GPRIN1         | 1.113E-10 |  |           |           |  | GPRIN1         |  |              |      |
| V3SVHSHC_7199438  | RPL36A-HNRNPH2 | 1.147E-10 |  |           |           |  | RPL36A-HNRNPH2 |  |              |      |
| V3SVHSHC_4796543  | DNAJB1         | 1.171E-10 |  | 2.842E-19 |           |  | DNAJB1         |  | DNAJB1       |      |
| V3SVHSHC_6113540  | POLE3          | 1.171E-10 |  |           |           |  | POLE3          |  |              |      |
| V3SVHSHC_9623024  | ZNF233         | 1.240E-10 |  |           |           |  | ZNF233         |  |              |      |
| V3SVHSHC_6437666  | Trappc10       | 1.244E-10 |  |           |           |  | Trappc10       |  |              |      |
| V3SVHSHC_9079316  | HIRIP3         | 1.281E-10 |  |           |           |  | HIRIP3         |  |              |      |
| V3SVHSHC_10354337 | IL22RA2        | 1.287E-10 |  |           |           |  | IL22RA2        |  |              |      |
| V3SVHSHC_10503167 | CAMK2N2        | 1.293E-10 |  |           |           |  | CAMK2N2        |  |              |      |
| V3SVHSHC_5192081  | SLCO5A1        | 1.347E-10 |  |           |           |  | SLCO5A1        |  |              |      |



|                   |          |           |  |           |           |  |          |  |  |  |
|-------------------|----------|-----------|--|-----------|-----------|--|----------|--|--|--|
| V3SVHSHC_6802613  | ZNF551   | 1.425E-10 |  |           |           |  | ZNF551   |  |  |  |
| V3SVHSHC_5729321  | QRICH2   | 1.469E-10 |  |           |           |  | QRICH2   |  |  |  |
| V3SVHSHC_7685297  | TMEM240  | 1.473E-10 |  |           |           |  | TMEM240  |  |  |  |
| V3SVHSHC_9008432  | HCAR2    | 1.495E-10 |  |           |           |  | HCAR2    |  |  |  |
| V3SVHSHC_6995927  | ZYX      | 1.549E-10 |  |           |           |  | ZYX      |  |  |  |
| V3SVHSHC_7435124  | TFEC     | 1.563E-10 |  |           |           |  | TFEC     |  |  |  |
| V3SVHSHC_9213131  | RTFDC1   | 1.598E-10 |  |           |           |  | RTFDC1   |  |  |  |
| V3SVHSHC_10558739 | SMIM13   | 1.672E-10 |  |           |           |  | SMIM13   |  |  |  |
| V3SVHSHC_5478059  | CATIP    | 1.676E-10 |  |           | 1.570E-01 |  | CATIP    |  |  |  |
| V3SVHSHC_7039586  | CACNG3   | 1.759E-10 |  |           |           |  | CACNG3   |  |  |  |
| V3SVHSHC_9821057  | TSTA3    | 1.802E-10 |  |           |           |  | TSTA3    |  |  |  |
| V3SVHSHC_10463567 | CNTNAP4  | 1.873E-10 |  |           |           |  | CNTNAP4  |  |  |  |
| V3SVHSHC_8517227  | OR6K3    | 1.906E-10 |  |           |           |  | OR6K3    |  |  |  |
| V3SVHSHC_7900523  | DTWD2    | 1.958E-10 |  |           |           |  | DTWD2    |  |  |  |
| V3SVHSHC_9225275  | PAPL     | 1.991E-10 |  |           |           |  | PAPL     |  |  |  |
| V3SVHSHC_9378923  | LGALSL   | 2.024E-10 |  |           |           |  | LGALSL   |  |  |  |
| V3SVHSHC_7350413  | ZNF263   | 2.081E-10 |  |           |           |  | ZNF263   |  |  |  |
| V3SVHSHC_7486736  | ACTG1    | 2.115E-10 |  |           |           |  | ACTG1    |  |  |  |
| V3SVHSHC_8606261  | ARID2    | 2.194E-10 |  |           |           |  | ARID2    |  |  |  |
| V3SVHSHC_8722586  | SPTBN1   | 2.290E-10 |  |           |           |  | SPTBN1   |  |  |  |
| V3SVHSHC_10298897 | CSNK2A2  | 2.315E-10 |  |           |           |  | CSNK2A2  |  |  |  |
| V3SVHSHC_5488223  | CCDC104  | 2.411E-10 |  |           |           |  | CCDC104  |  |  |  |
| V3SVHSHC_5012396  | CPNE8    | 2.444E-10 |  |           |           |  | CPNE8    |  |  |  |
| V3SVHSHC_5210891  | HAS1     | 2.480E-10 |  |           |           |  | HAS1     |  |  |  |
| V3SVHSHC_9216134  | WDR17    | 2.567E-10 |  |           |           |  | WDR17    |  |  |  |
| V3SVHSHC_6753410  | PCDHA13  | 2.599E-10 |  |           | 2.894E-03 |  | PCDHA13  |  |  |  |
| V3SVHSHC_6606758  | MAGEC3   | 2.768E-10 |  |           |           |  | MAGEC3   |  |  |  |
| V3SVHSHC_6339425  | MS4A6E   | 2.804E-10 |  |           |           |  | MS4A6E   |  |  |  |
| V3SVHSHC_5490038  | LITAF    | 2.866E-10 |  |           |           |  | LITAF    |  |  |  |
| V3SVHSHC_9330776  | NLK      | 2.871E-10 |  |           |           |  | NLK      |  |  |  |
| V3SVHSHC_9974243  | CT47A9   | 2.887E-10 |  |           |           |  | CT47A9   |  |  |  |
| V3SVHSHC_8070011  | B4GALT7  | 2.888E-10 |  |           |           |  | B4GALT7  |  |  |  |
| V3SVHSHC_9749018  | NDUFB5   | 2.955E-10 |  |           |           |  | NDUFB5   |  |  |  |
| V3SVHSHC_10652459 | PJA2     | 3.004E-10 |  |           |           |  | PJA2     |  |  |  |
| V3SVHSHC_6513764  | AMTN     | 3.131E-10 |  |           |           |  | AMTN     |  |  |  |
| V3SVHSHC_7776014  | SERPINB3 | 3.185E-10 |  |           |           |  | SERPINB3 |  |  |  |
| V3SVHSHC_5881748  | ORM2     | 3.312E-10 |  |           |           |  | ORM2     |  |  |  |
| V3SVHSHC_6192872  | POLA2    | 3.314E-10 |  |           |           |  | POLA2    |  |  |  |
| V3SVHSHC_7206434  | PERP     | 3.318E-10 |  |           |           |  | PERP     |  |  |  |
| V3SVHSHC_9861086  | MBOAT4   | 3.396E-10 |  |           |           |  | MBOAT4   |  |  |  |
| V3SVHSHC_7110965  | TTC18    | 3.437E-10 |  |           |           |  | TTC18    |  |  |  |
| V3SVHSHC_8380772  | Tarm1    | 3.447E-10 |  | 2.263E-03 |           |  | Tarm1    |  |  |  |
| V3SVHSHC_8219963  | NEMF     | 3.477E-10 |  |           |           |  | NEMF     |  |  |  |
| V3SVHSHC_9073937  | KIAA1045 | 3.511E-10 |  |           |           |  | KIAA1045 |  |  |  |
| V3SVHSHC_5809676  | DISP1    | 3.560E-10 |  |           |           |  | DISP1    |  |  |  |
| V3SVHSHC_9077468  | NEK9     | 3.576E-10 |  |           |           |  | NEK9     |  |  |  |
| V3SVHSHC_5075228  | MCM2     | 3.618E-10 |  |           |           |  | MCM2     |  |  |  |
| V3SVHSHC_9521318  | PEX11B   | 3.775E-10 |  |           |           |  | PEX11B   |  |  |  |
| V3SVHSHC_10332722 | VPS37C   | 3.880E-10 |  |           |           |  | VPS37C   |  |  |  |
| V3SVHSHC_5334839  | ACTN4    | 4.101E-10 |  |           |           |  | ACTN4    |  |  |  |
| V3SVHSHC_7788125  | GMNN     | 4.170E-10 |  |           |           |  | GMNN     |  |  |  |
| V3SVHSHC_6270554  | PLCB4    | 4.188E-10 |  |           |           |  | PLCB4    |  |  |  |
| V3SVHSHC_10092713 | GPBP1    | 4.213E-10 |  |           |           |  | GPBP1    |  |  |  |
| V3SVHSHC_9651932  | TRHDE    | 4.354E-10 |  |           |           |  | TRHDE    |  |  |  |
| V3SVHSHC_7671833  | PALMD    | 4.382E-10 |  |           |           |  | PALMD    |  |  |  |

|                   |              |           |  |  |           |  |              |  |  |       |
|-------------------|--------------|-----------|--|--|-----------|--|--------------|--|--|-------|
| V3SVHSHC_8557454  | DDX51        | 4.390E-10 |  |  |           |  | DDX51        |  |  |       |
| V3SVHSHC_8546663  | RORA         | 4.616E-10 |  |  |           |  | RORA         |  |  |       |
| V3SVHSHC_7356551  | PKD1L2       | 5.073E-10 |  |  |           |  | PKD1L2       |  |  |       |
| V3SVHSHC_5844458  | LOC101929702 | 5.109E-10 |  |  |           |  | LOC101929702 |  |  |       |
| V3SVHSHC_9346055  | ZC3H3        | 5.294E-10 |  |  |           |  | ZC3H3        |  |  |       |
| V3SVHSHC_6237686  | Dcaf17       | 5.737E-10 |  |  |           |  | Dcaf17       |  |  |       |
| V3SVHSHC_8443868  | MAP7         | 6.498E-10 |  |  |           |  | MAP7         |  |  |       |
| V3SVHSHC_9438488  | CCDC149      | 6.546E-10 |  |  |           |  | CCDC149      |  |  |       |
| V3SVHSHC_5979692  | SEPT14       | 6.549E-10 |  |  |           |  | SEPT14       |  |  |       |
| V3SVHSHC_8784824  | NNAT         | 6.809E-10 |  |  |           |  | NNAT         |  |  |       |
| V3SVHSHC_7336817  | FUT5         | 6.817E-10 |  |  |           |  | FUT5         |  |  |       |
| V3SVHSHC_9291044  | LOC100294341 | 6.826E-10 |  |  |           |  | LOC100294341 |  |  |       |
| V3SVHSHC_9387371  | MAMDC2       | 7.112E-10 |  |  |           |  | MAMDC2       |  |  |       |
| V3SVHSHC_7219634  | LSG1         | 7.486E-10 |  |  |           |  | LSG1         |  |  |       |
| V3SVHSHC_10764362 | ELP2         | 7.590E-10 |  |  |           |  | ELP2         |  |  |       |
| V3SVHSHC_7745984  | HAVCR1       | 7.612E-10 |  |  |           |  | HAVCR1       |  |  |       |
| V3SVHSHC_5877458  | AQP7         | 7.803E-10 |  |  |           |  | AQP7         |  |  |       |
| V3SVHSHC_8352359  | OR52W1       | 7.844E-10 |  |  |           |  | OR52W1       |  |  |       |
| V3SVHSHC_9624047  | KIAA0922     | 8.367E-10 |  |  |           |  | KIAA0922     |  |  |       |
| V3SVHSHC_9691037  | GPR83        | 8.442E-10 |  |  |           |  | GPR83        |  |  |       |
| V3SVHSHC_10049516 | GYS1         | 8.701E-10 |  |  |           |  | GYS1         |  |  |       |
| V3SVHSHC_5526800  | CBFB         | 8.811E-10 |  |  |           |  | CBFB         |  |  |       |
| V3SVHSHC_9198875  | PPM1N        | 8.855E-10 |  |  |           |  | PPM1N        |  |  |       |
| V3SVHSHC_9264710  | CCR9         | 9.027E-10 |  |  |           |  | CCR9         |  |  |       |
| V3SVHSHC_9354635  | MAMDC4       | 9.087E-10 |  |  |           |  | MAMDC4       |  |  |       |
| V3SVHSHC_10825775 | NRXN2        | 9.494E-10 |  |  |           |  | NRXN2        |  |  |       |
| V3SVHSHC_6798719  | TAAR9        | 9.879E-10 |  |  |           |  | TAAR9        |  |  |       |
| V3SVHSHC_10223855 | C1orf229     | 1.004E-09 |  |  |           |  | C1orf229     |  |  |       |
| V3SVHSHC_4731434  | SLC30A1      | 1.043E-09 |  |  |           |  | SLC30A1      |  |  |       |
| V3SVHSHC_7656719  | DBR1         | 1.049E-09 |  |  |           |  | DBR1         |  |  |       |
| V3SVHSHC_4788458  | RAB11FIP3    | 1.073E-09 |  |  |           |  | RAB11FIP3    |  |  |       |
| V3SVHSHC_9298403  | LYVE1        | 1.136E-09 |  |  |           |  | LYVE1        |  |  |       |
| V3SVHSHC_4654709  | TYW1         | 1.140E-09 |  |  |           |  | TYW1         |  |  |       |
| V3SVHSHC_6737999  | NUMB         | 1.143E-09 |  |  |           |  | NUMB         |  |  |       |
| V3SVHSHC_7303751  | LOC101060521 | 1.168E-09 |  |  |           |  | LOC101060521 |  |  |       |
| V3SVHSHC_9477131  | LZTS1        | 1.176E-09 |  |  |           |  | LZTS1        |  |  |       |
| V3SVHSHC_7712720  | LILRB5       | 1.179E-09 |  |  |           |  | LILRB5       |  |  |       |
| V3SVHSHC_9955532  | TPD52        | 1.184E-09 |  |  |           |  | TPD52        |  |  |       |
| V3SVHSHC_6806375  | SCRT2        | 1.197E-09 |  |  |           |  | SCRT2        |  |  |       |
| V3SVHSHC_5315303  | ADH1A        | 1.211E-09 |  |  |           |  | ADH1A        |  |  |       |
| V3SVHSHC_4710248  | BTF3         | 1.235E-09 |  |  |           |  | BTF3         |  |  |       |
| V3SVHSHC_6129149  | SDHB         | 1.249E-09 |  |  |           |  | SDHB         |  |  |       |
| V3SVHSHC_10019981 | MRPS30       | 1.262E-09 |  |  |           |  | MRPS30       |  |  |       |
| V3SVHSHC_7946789  | TEX30        | 1.281E-09 |  |  |           |  | TEX30        |  |  |       |
| V3SVHSHC_10296818 | SYN1         | 1.341E-09 |  |  |           |  | SYN1         |  |  |       |
| V3SVHSHC_6875213  | STRADA       | 1.345E-09 |  |  |           |  | STRADA       |  |  |       |
| V3SVHSHC_10306058 | MMRN2        | 1.369E-09 |  |  |           |  | MMRN2        |  |  |       |
| V3SVHSHC_4791329  | FYN          | 1.402E-09 |  |  |           |  | FYN          |  |  |       |
| V3SVHSHC_6445982  | ANKRD54      | 1.415E-09 |  |  |           |  | ANKRD54      |  |  |       |
| V3SVHSHC_6942203  | ACAA2        | 1.446E-09 |  |  |           |  | ACAA2        |  |  |       |
| V3SVHSHC_7616591  | AKAP14       | 1.486E-09 |  |  |           |  | AKAP14       |  |  |       |
| V3SVHSHC_5724734  | FRS3         | 1.509E-09 |  |  |           |  | FRS3         |  |  |       |
| V3SVHSHC_10301504 | FAAH2        | 1.520E-09 |  |  | 2.864E-10 |  | FAAH2        |  |  | FAAH2 |
| V3SVHSHC_5955041  | SEPT8        | 1.522E-09 |  |  |           |  | SEPT8        |  |  |       |

|                   |              |           |  |           |           |  |              |  |         |      |
|-------------------|--------------|-----------|--|-----------|-----------|--|--------------|--|---------|------|
| V3SVHSHC_5633291  | AQP4         | 1.562E-09 |  |           |           |  | AQP4         |  |         |      |
| V3SVHSHC_6062720  | WBP4         | 1.639E-09 |  |           |           |  | WBP4         |  |         |      |
| V3SVHSHC_6956921  | NAPRT1       | 1.679E-09 |  |           |           |  | NAPRT1       |  |         |      |
| V3SVHSHC_9977873  | LRRC8D       | 1.770E-09 |  |           |           |  | LRRC8D       |  |         |      |
| V3SVHSHC_7636754  | NWD1         | 1.823E-09 |  |           |           |  | NWD1         |  |         |      |
| V3SVHSHC_9919595  | MYH3         | 1.842E-09 |  |           |           |  | MYH3         |  |         |      |
| V3SVHSHC_6622730  | CLPP         | 1.885E-09 |  |           |           |  | CLPP         |  |         |      |
| V3SVHSHC_7506470  | TTC7A        | 1.901E-09 |  |           |           |  | TTC7A        |  |         |      |
| V3SVHSHC_7955567  | OR7A10       | 1.936E-09 |  |           |           |  | OR7A10       |  |         |      |
| V3SVHSHC_9638501  | GNL3L        | 2.026E-09 |  |           |           |  | GNL3L        |  |         |      |
| V3SVHSHC_9617018  | LYG1         | 2.052E-09 |  |           |           |  | LYG1         |  |         |      |
| V3SVHSHC_9675560  | LOC101929065 | 2.069E-09 |  |           |           |  | LOC101929065 |  |         |      |
| V3SVHSHC_5048630  | SES2         | 2.146E-09 |  |           |           |  | SES2         |  |         |      |
| V3SVHSHC_5216930  | C21ORF62     | 2.156E-09 |  |           |           |  | C21ORF62     |  |         |      |
| V3SVHSHC_10763801 | TM7SF2       | 2.170E-09 |  |           |           |  | TM7SF2       |  |         |      |
| V3SVHSHC_6918245  | EML2         | 2.183E-09 |  |           |           |  | EML2         |  |         |      |
| V3SVHSHC_8160860  | GYPC         | 2.249E-09 |  |           |           |  | GYPC         |  |         |      |
| V3SVHSHC_9077501  | IDO2         | 2.254E-09 |  |           |           |  | IDO2         |  |         |      |
| V3SVHSHC_8916791  | BAD          | 2.276E-09 |  |           |           |  | BAD          |  |         |      |
| V3SVHSHC_9004868  | OR52B6       | 2.348E-09 |  |           |           |  | OR52B6       |  |         |      |
| V3SVHSHC_5275010  | KCNH5        | 2.402E-09 |  |           |           |  | KCNH5        |  |         |      |
| V3SVHSHC_8789081  | CAMK2B       | 2.515E-09 |  |           |           |  | CAMK2B       |  |         |      |
| V3SVHSHC_8998466  | OCM          | 2.606E-09 |  | 5.737E-52 | 1.058E-03 |  | OCM          |  | OCM     |      |
| V3SVHSHC_9652493  | LIF          | 2.798E-09 |  |           |           |  | LIF          |  |         |      |
| V3SVHSHC_9389318  | PDCD6IP      | 2.842E-09 |  |           |           |  | PDCD6IP      |  |         |      |
| V3SVHSHC_5982827  | TRUB2        | 2.887E-09 |  |           |           |  | TRUB2        |  |         |      |
| V3SVHSHC_5978867  | ZMPSTE24     | 2.901E-09 |  |           |           |  | ZMPSTE24     |  |         |      |
| V3SVHSHC_9609494  | SDHC         | 2.978E-09 |  |           |           |  | SDHC         |  |         |      |
| V3SVHSHC_10297874 | WBSCR28      | 3.035E-09 |  | 1.413E-10 |           |  | WBSCR28      |  | WBSCR28 |      |
| V3SVHSHC_6734006  | SMPX         | 3.088E-09 |  |           |           |  | SMPX         |  |         |      |
| V3SVHSHC_9058691  | ICAM1        | 3.195E-09 |  |           |           |  | ICAM1        |  |         |      |
| V3SVHSHC_7529372  | PI3          | 3.249E-09 |  |           |           |  | PI3          |  |         |      |
| V3SVHSHC_10783733 | ANKRD55      | 3.266E-09 |  |           |           |  | ANKRD55      |  |         |      |
| V3SVHSHC_8316983  | BRSK2        | 3.380E-09 |  |           |           |  | BRSK2        |  |         |      |
| V3SVHSHC_8046152  | KCNB2        | 3.493E-09 |  |           |           |  | KCNB2        |  |         |      |
| V3SVHSHC_9414794  | PEX5L        | 3.501E-09 |  |           |           |  | PEX5L        |  |         |      |
| V3SVHSHC_10136867 | KIAA1211     | 3.518E-09 |  |           |           |  | KIAA1211     |  |         |      |
| V3SVHSHC_6474098  | CDH26        | 3.553E-09 |  |           |           |  | CDH26        |  |         |      |
| V3SVHSHC_7504919  | CCDC30       | 3.560E-09 |  |           |           |  | CCDC30       |  |         |      |
| V3SVHSHC_10792808 | ACTR8        | 3.618E-09 |  |           |           |  | ACTR8        |  |         |      |
| V3SVHSHC_5356982  | PIGW         | 3.626E-09 |  |           | 3.581E-10 |  | PIGW         |  |         | PIGW |
| V3SVHSHC_5847824  | KCNJ9        | 3.645E-09 |  |           |           |  | KCNJ9        |  |         |      |
| V3SVHSHC_8808155  | FOXJ1        | 3.663E-09 |  |           |           |  | FOXJ1        |  |         |      |
| V3SVHSHC_10546430 | LST1         | 4.095E-09 |  |           |           |  | LST1         |  |         |      |
| V3SVHSHC_10655330 | ZNF606       | 4.117E-09 |  |           |           |  | ZNF606       |  |         |      |
| V3SVHSHC_7115321  | S100A7       | 4.118E-09 |  |           |           |  | S100A7       |  |         |      |
| V3SVHSHC_6162380  | ZNF311       | 4.122E-09 |  |           |           |  | ZNF311       |  |         |      |
| V3SVHSHC_5639891  | FABP2        | 4.323E-09 |  |           |           |  | FABP2        |  |         |      |
| V3SVHSHC_6956789  | RIPK2        | 4.498E-09 |  |           |           |  | RIPK2        |  |         |      |
| V3SVHSHC_10831550 | PGC          | 4.516E-09 |  |           |           |  | PGC          |  |         |      |
| V3SVHSHC_5491127  | ANKRD34B     | 4.588E-09 |  |           |           |  | ANKRD34B     |  |         |      |
| V3SVHSHC_7770173  | PKN3         | 4.899E-09 |  |           |           |  | PKN3         |  |         |      |
| V3SVHSHC_7251116  | ALG12        | 5.035E-09 |  |           |           |  | ALG12        |  |         |      |
| V3SVHSHC_9758918  | GCFC2        | 5.488E-09 |  |           |           |  | GCFC2        |  |         |      |

|                   |              |           |  |           |           |  |              |  |        |  |
|-------------------|--------------|-----------|--|-----------|-----------|--|--------------|--|--------|--|
| V3SVHSHC_10587185 | FAM118B      | 5.596E-09 |  |           |           |  | FAM118B      |  |        |  |
| V3SVHSHC_8346254  | ALG14        | 5.614E-09 |  |           |           |  | ALG14        |  |        |  |
| V3SVHSHC_7671602  | TP53BP2      | 5.789E-09 |  |           |           |  | TP53BP2      |  |        |  |
| V3SVHSHC_9554021  | AIM1L        | 6.135E-09 |  |           |           |  | AIM1L        |  |        |  |
| V3SVHSHC_10644407 | FCHSD2       | 6.210E-09 |  |           |           |  | FCHSD2       |  |        |  |
| V3SVHSHC_5058992  | APOL5        | 6.265E-09 |  |           |           |  | APOL5        |  |        |  |
| V3SVHSHC_10652426 | GALC         | 6.424E-09 |  |           |           |  | GALC         |  |        |  |
| V3SVHSHC_7462547  | ATP6V1A      | 6.527E-09 |  |           |           |  | ATP6V1A      |  |        |  |
| V3SVHSHC_9769709  | SIRT1        | 6.731E-09 |  |           |           |  | SIRT1        |  |        |  |
| V3SVHSHC_7948505  | ERGIC2       | 6.755E-09 |  |           |           |  | ERGIC2       |  |        |  |
| V3SVHSHC_6872243  | HOMER1       | 6.977E-09 |  |           |           |  | HOMER1       |  |        |  |
| V3SVHSHC_9588341  | LCN12        | 7.013E-09 |  |           |           |  | LCN12        |  |        |  |
| V3SVHSHC_6469181  | EPS15L1      | 7.060E-09 |  |           |           |  | EPS15L1      |  |        |  |
| V3SVHSHC_5847296  | FAM109A      | 7.325E-09 |  |           |           |  | FAM109A      |  |        |  |
| V3SVHSHC_10290482 | RLTPR        | 7.335E-09 |  |           |           |  | RLTPR        |  |        |  |
| V3SVHSHC_8922302  | Phax         | 7.855E-09 |  |           |           |  | Phax         |  |        |  |
| V3SVHSHC_9961637  | ZDHHC15      | 8.337E-09 |  |           |           |  | ZDHHC15      |  |        |  |
| V3SVHSHC_5768393  | CD70         | 8.358E-09 |  |           |           |  | CD70         |  |        |  |
| V3SVHSHC_8391563  | GRXCR1       | 8.492E-09 |  |           |           |  | GRXCR1       |  |        |  |
| V3SVHSHC_8189174  | PIH1D1       | 9.049E-09 |  |           |           |  | PIH1D1       |  |        |  |
| V3SVHSHC_5019623  | NPPB         | 9.077E-09 |  |           |           |  | NPPB         |  |        |  |
| V3SVHSHC_5715065  | ZNF554       | 9.081E-09 |  |           |           |  | ZNF554       |  |        |  |
| V3SVHSHC_6304841  | CRTAP        | 9.446E-09 |  |           |           |  | CRTAP        |  |        |  |
| V3SVHSHC_6924350  | EBI3         | 1.022E-08 |  |           |           |  | EBI3         |  |        |  |
| V3SVHSHC_8494325  | CD83         | 1.027E-08 |  |           |           |  | CD83         |  |        |  |
| V3SVHSHC_8206862  | UPRT         | 1.046E-08 |  |           |           |  | UPRT         |  |        |  |
| V3SVHSHC_8349950  | GRK4         | 1.066E-08 |  |           |           |  | GRK4         |  |        |  |
| V3SVHSHC_8399747  | SCAMP3       | 1.175E-08 |  |           |           |  | SCAMP3       |  |        |  |
| V3SVHSHC_7697870  | OR52K2       | 1.206E-08 |  | 1.082E-18 |           |  | OR52K2       |  | OR52K2 |  |
| V3SVHSHC_8089877  | PDLIM2       | 1.223E-08 |  |           |           |  | PDLIM2       |  |        |  |
| V3SVHSHC_9550226  | ETFA         | 1.237E-08 |  |           |           |  | ETFA         |  |        |  |
| V3SVHSHC_6758393  | RNFT2        | 1.256E-08 |  |           |           |  | RNFT2        |  |        |  |
| V3SVHSHC_5286560  | MRPS6        | 1.307E-08 |  |           |           |  | MRPS6        |  |        |  |
| V3SVHSHC_7938044  | HEATR2       | 1.376E-08 |  |           |           |  | HEATR2       |  |        |  |
| V3SVHSHC_5128721  | BAAT         | 1.379E-08 |  |           |           |  | BAAT         |  |        |  |
| V3SVHSHC_8128421  | WBP11        | 1.396E-08 |  |           |           |  | WBP11        |  |        |  |
| V3SVHSHC_6943919  | PRKCD        | 1.478E-08 |  |           |           |  | PRKCD        |  |        |  |
| V3SVHSHC_7411496  | TMEM243      | 1.618E-08 |  |           |           |  | TMEM243      |  |        |  |
| V3SVHSHC_7896332  | PAPOLB       | 1.657E-08 |  |           |           |  | PAPOLB       |  |        |  |
| V3SVHSHC_6426248  | PHKA1        | 1.713E-08 |  |           |           |  | PHKA1        |  |        |  |
| V3SVHSHC_9541481  | ZMYM2        | 1.755E-08 |  |           |           |  | ZMYM2        |  |        |  |
| V3SVHSHC_4874489  | SETDB2       | 1.774E-08 |  |           |           |  | SETDB2       |  |        |  |
| V3SVHSHC_8459048  | ZNF555       | 1.776E-08 |  |           | 4.878E-01 |  | ZNF555       |  |        |  |
| V3SVHSHC_7253030  | C1orf127     | 1.789E-08 |  |           |           |  | C1orf127     |  |        |  |
| V3SVHSHC_10538180 | EDF1         | 1.819E-08 |  |           |           |  | EDF1         |  |        |  |
| V3SVHSHC_6808157  | LOC101929264 | 1.908E-08 |  |           |           |  | LOC101929264 |  |        |  |
| V3SVHSHC_8284907  | LOC100996713 | 1.979E-08 |  |           |           |  | LOC100996713 |  |        |  |
| V3SVHSHC_10061033 | NUP62CL      | 1.995E-08 |  |           |           |  | NUP62CL      |  |        |  |
| V3SVHSHC_6856898  | YBX3         | 2.081E-08 |  |           |           |  | YBX3         |  |        |  |
| V3SVHSHC_10706744 | COX6B2       | 2.085E-08 |  |           |           |  | COX6B2       |  |        |  |
| V3SVHSHC_10283948 | DAGLB        | 2.229E-08 |  |           |           |  | DAGLB        |  |        |  |
| V3SVHSHC_9418358  | SAA4         | 2.232E-08 |  |           | 7.352E-03 |  | SAA4         |  |        |  |
| V3SVHSHC_9048560  | CASP12       | 2.251E-08 |  |           |           |  | CASP12       |  |        |  |
| V3SVHSHC_9366317  | FOSB         | 2.451E-08 |  |           |           |  | FOSB         |  |        |  |

|                   |              |           |  |           |           |  |              |  |           |        |
|-------------------|--------------|-----------|--|-----------|-----------|--|--------------|--|-----------|--------|
| V3SVHSHC_6852740  | MTCP1        | 2.474E-08 |  |           |           |  | MTCP1        |  |           |        |
| V3SVHSHC_7169573  | SBK1         | 2.512E-08 |  |           |           |  | SBK1         |  |           |        |
| V3SVHSHC_9302726  | NPAP1        | 2.547E-08 |  |           |           |  | NPAP1        |  |           |        |
| V3SVHSHC_10466009 | CTBP1        | 2.694E-08 |  |           |           |  | CTBP1        |  |           |        |
| V3SVHSHC_5652596  | STPG1        | 2.707E-08 |  |           |           |  | STPG1        |  |           |        |
| V3SVHSHC_4638869  | CACNA1C      | 2.777E-08 |  |           |           |  | CACNA1C      |  |           |        |
| V3SVHSHC_6762056  | CLEC16A      | 2.863E-08 |  |           |           |  | CLEC16A      |  |           |        |
| V3SVHSHC_9825875  | FAM20C       | 2.863E-08 |  |           | 4.429E-13 |  | FAM20C       |  |           | FAM20C |
| V3SVHSHC_6088988  | OR4F15       | 2.868E-08 |  |           |           |  | OR4F15       |  |           |        |
| V3SVHSHC_10242236 | Gpank1       | 2.884E-08 |  |           |           |  | Gpank1       |  |           |        |
| V3SVHSHC_9601112  | Pstk         | 2.973E-08 |  |           |           |  | Pstk         |  |           |        |
| V3SVHSHC_6334079  | C9ORF9       | 3.076E-08 |  |           |           |  | C9ORF9       |  |           |        |
| V3SVHSHC_8169968  | SH2D1B       | 3.240E-08 |  |           |           |  | SH2D1B       |  |           |        |
| V3SVHSHC_10759907 | LOC646862    | 3.354E-08 |  | 4.990E-17 |           |  | LOC646862    |  | LOC646862 |        |
| V3SVHSHC_5898545  | S100B        | 3.416E-08 |  |           |           |  | S100B        |  |           |        |
| V3SVHSHC_9455582  | TMEM91       | 3.513E-08 |  |           |           |  | TMEM91       |  |           |        |
| V3SVHSHC_8178020  | SYS1         | 3.556E-08 |  |           | 3.420E-01 |  | SYS1         |  |           |        |
| V3SVHSHC_9644111  | LOC101929936 | 3.596E-08 |  |           |           |  | LOC101929936 |  |           |        |
| V3SVHSHC_9820496  | CRIP2        | 3.635E-08 |  |           |           |  | CRIP2        |  |           |        |
| V3SVHSHC_7017938  | CCDC127      | 3.672E-08 |  |           |           |  | CCDC127      |  |           |        |
| V3SVHSHC_6160763  | ZNF786       | 3.749E-08 |  |           |           |  | ZNF786       |  |           |        |
| V3SVHSHC_5792747  | ARHGAP44     | 3.836E-08 |  |           |           |  | ARHGAP44     |  |           |        |
| V3SVHSHC_6953291  | IL11         | 4.127E-08 |  |           |           |  | IL11         |  |           |        |
| V3SVHSHC_4748297  | IQCD         | 4.384E-08 |  |           |           |  | IQCD         |  |           |        |
| V3SVHSHC_9571214  | PDCD7        | 4.426E-08 |  |           |           |  | PDCD7        |  |           |        |
| V3SVHSHC_6685958  | NLGN3        | 4.461E-08 |  |           |           |  | NLGN3        |  |           |        |
| V3SVHSHC_5187164  | PKP1         | 4.642E-08 |  |           |           |  | PKP1         |  |           |        |
| V3SVHSHC_9338795  | APLN         | 4.765E-08 |  |           |           |  | APLN         |  |           |        |
| V3SVHSHC_10507226 | NAT8B        | 4.852E-08 |  |           |           |  | NAT8B        |  |           |        |
| V3SVHSHC_8122085  | LOC101927375 | 5.152E-08 |  |           |           |  | LOC101927375 |  |           |        |
| V3SVHSHC_5949299  | PPP1R17      | 5.432E-08 |  |           |           |  | PPP1R17      |  |           |        |
| V3SVHSHC_7007642  | RBBP5        | 5.469E-08 |  |           |           |  | RBBP5        |  |           |        |
| V3SVHSHC_9911048  | CD81         | 5.490E-08 |  |           |           |  | CD81         |  |           |        |
| V3SVHSHC_7449545  | OR10A3       | 5.673E-08 |  |           |           |  | OR10A3       |  |           |        |
| V3SVHSHC_10024898 | NUPL1        | 5.736E-08 |  |           |           |  | NUPL1        |  |           |        |
| V3SVHSHC_8369255  | Aspg         | 5.766E-08 |  |           |           |  | Aspg         |  |           |        |
| V3SVHSHC_10520888 | FSCN1        | 5.798E-08 |  |           |           |  | FSCN1        |  |           |        |
| V3SVHSHC_5461526  | SERINC4      | 6.094E-08 |  |           |           |  | SERINC4      |  |           |        |
| V3SVHSHC_5931380  | AFF1         | 6.258E-08 |  |           |           |  | AFF1         |  |           |        |
| V3SVHSHC_7760900  | BCL6         | 6.429E-08 |  |           |           |  | BCL6         |  |           |        |
| V3SVHSHC_8131193  | DIAPH2       | 6.917E-08 |  |           |           |  | DIAPH2       |  |           |        |
| V3SVHSHC_7543232  | VPS51        | 7.133E-08 |  |           |           |  | VPS51        |  |           |        |
| V3SVHSHC_9188942  | DSP          | 7.288E-08 |  | 1.059E-12 |           |  | DSP          |  | DSP       |        |
| V3SVHSHC_6954017  | OR4K14       | 8.370E-08 |  |           |           |  | OR4K14       |  |           |        |
| V3SVHSHC_7871054  | TMED10       | 8.543E-08 |  |           |           |  | TMED10       |  |           |        |
| V3SVHSHC_8940881  | CREB3L2      | 8.543E-08 |  |           |           |  | CREB3L2      |  |           |        |
| V3SVHSHC_5538020  | SRP68        | 8.745E-08 |  |           |           |  | SRP68        |  |           |        |
| V3SVHSHC_9161354  | PLAGL2       | 8.851E-08 |  |           |           |  | PLAGL2       |  |           |        |
| V3SVHSHC_10442843 | RUFY3        | 9.107E-08 |  |           |           |  | RUFY3        |  |           |        |
| V3SVHSHC_10713707 | NIN          | 9.362E-08 |  |           |           |  | NIN          |  |           |        |
| V3SVHSHC_8203067  | SLC35G3      | 9.424E-08 |  |           |           |  | SLC35G3      |  |           |        |
| V3SVHSHC_10606655 | PRRG4        | 9.954E-08 |  |           |           |  | PRRG4        |  |           |        |
| V3SVHSHC_7288307  | Erc6l        | 1.001E-07 |  |           |           |  | Erc6l        |  |           |        |

|                   |              |           |  |           |           |  |              |  |          |  |
|-------------------|--------------|-----------|--|-----------|-----------|--|--------------|--|----------|--|
| V3SVHSHC_8224682  | RHOA         | 1.023E-07 |  |           |           |  | RHOA         |  |          |  |
| V3SVHSHC_4672298  | VIMP         | 1.069E-07 |  |           |           |  | VIMP         |  |          |  |
| V3SVHSHC_9496832  | LDB1         | 1.080E-07 |  |           |           |  | LDB1         |  |          |  |
| V3SVHSHC_6088823  | NLRP7        | 1.093E-07 |  |           |           |  | NLRP7        |  |          |  |
| V3SVHSHC_8036714  | MINK1        | 1.153E-07 |  |           |           |  | MINK1        |  |          |  |
| V3SVHSHC_9672524  | ZCCHC10      | 1.166E-07 |  |           |           |  | ZCCHC10      |  |          |  |
| V3SVHSHC_7452779  | TEP1         | 1.209E-07 |  |           |           |  | TEP1         |  |          |  |
| V3SVHSHC_4661177  | GABRP        | 1.225E-07 |  |           |           |  | GABRP        |  |          |  |
| V3SVHSHC_6874718  | CNTROB       | 1.263E-07 |  |           |           |  | CNTROB       |  |          |  |
| V3SVHSHC_7780502  | MME          | 1.342E-07 |  |           |           |  | MME          |  |          |  |
| V3SVHSHC_7895408  | POLR3G       | 1.402E-07 |  |           |           |  | POLR3G       |  |          |  |
| V3SVHSHC_9652691  | LIN28B       | 1.468E-07 |  |           |           |  | LIN28B       |  |          |  |
| V3SVHSHC_10670345 | SLC25A46     | 1.470E-07 |  | 3.887E-19 |           |  | SLC25A46     |  | SLC25A46 |  |
| V3SVHSHC_8239532  | LY6E         | 1.588E-07 |  |           |           |  | LY6E         |  |          |  |
| V3SVHSHC_10555274 | Tmco5a       | 1.597E-07 |  |           |           |  | Tmco5a       |  |          |  |
| V3SVHSHC_4896698  | IGSF5        | 1.622E-07 |  |           |           |  | IGSF5        |  |          |  |
| V3SVHSHC_5995565  | ZNF682       | 1.631E-07 |  |           |           |  | ZNF682       |  |          |  |
| V3SVHSHC_8445617  | ESRP2        | 1.673E-07 |  |           |           |  | ESRP2        |  |          |  |
| V3SVHSHC_6294479  | SPCS3        | 1.692E-07 |  |           |           |  | SPCS3        |  |          |  |
| V3SVHSHC_9305861  | SPARCL1      | 1.699E-07 |  |           |           |  | SPARCL1      |  |          |  |
| V3SVHSHC_5269334  | IFNA2        | 1.704E-07 |  | 1.590E-22 |           |  | IFNA2        |  | IFNA2    |  |
| V3SVHSHC_6747536  | TMX4         | 1.734E-07 |  |           |           |  | TMX4         |  |          |  |
| V3SVHSHC_10344866 | PITX1        | 1.802E-07 |  |           |           |  | PITX1        |  |          |  |
| V3SVHSHC_10371233 | LOC441239    | 1.850E-07 |  |           |           |  | LOC441239    |  |          |  |
| V3SVHSHC_8281706  | EBF4         | 1.980E-07 |  |           |           |  | EBF4         |  |          |  |
| V3SVHSHC_6935174  | RBP4         | 1.995E-07 |  |           | 3.276E-02 |  | RBP4         |  |          |  |
| V3SVHSHC_8579762  | AAAS         | 2.068E-07 |  |           |           |  | AAAS         |  |          |  |
| V3SVHSHC_7921247  | PDP1         | 2.072E-07 |  |           |           |  | PDP1         |  |          |  |
| V3SVHSHC_8295995  | EARS2        | 2.096E-07 |  |           |           |  | EARS2        |  |          |  |
| V3SVHSHC_9067568  | NHLRC4       | 2.127E-07 |  |           |           |  | NHLRC4       |  |          |  |
| V3SVHSHC_7417304  | ANXA8L1      | 2.159E-07 |  |           |           |  | ANXA8L1      |  |          |  |
| V3SVHSHC_9388097  | CST3         | 2.199E-07 |  |           |           |  | CST3         |  |          |  |
| V3SVHSHC_5037212  | LOC101928058 | 2.229E-07 |  |           |           |  | LOC101928058 |  |          |  |
| V3SVHSHC_8741957  | PTRH1        | 2.242E-07 |  |           |           |  | PTRH1        |  |          |  |
| V3SVHSHC_8100041  | APOL6        | 2.312E-07 |  |           |           |  | APOL6        |  |          |  |
| V3SVHSHC_8366054  | POTEA        | 2.408E-07 |  |           |           |  | POTEA        |  |          |  |
| V3SVHSHC_8825975  | RBM34        | 2.471E-07 |  |           |           |  | RBM34        |  |          |  |
| V3SVHSHC_10447133 | RNF169       | 2.495E-07 |  |           |           |  | RNF169       |  |          |  |
| V3SVHSHC_6472118  | SULT1E1      | 2.505E-07 |  |           |           |  | SULT1E1      |  |          |  |
| V3SVHSHC_8921048  | IGF1         | 2.511E-07 |  |           |           |  | IGF1         |  |          |  |
| V3SVHSHC_9014075  | NOL7         | 2.532E-07 |  |           |           |  | NOL7         |  |          |  |
| V3SVHSHC_5593031  | RNF219       | 2.533E-07 |  |           |           |  | RNF219       |  |          |  |
| V3SVHSHC_8790368  | MRPL39       | 2.557E-07 |  |           |           |  | MRPL39       |  |          |  |
| V3SVHSHC_8304905  | NPM3         | 2.626E-07 |  |           |           |  | NPM3         |  |          |  |
| V3SVHSHC_9996386  | C3orf27      | 2.634E-07 |  |           |           |  | C3orf27      |  |          |  |
| V3SVHSHC_9560324  | SOX30        | 2.653E-07 |  |           |           |  | SOX30        |  |          |  |
| V3SVHSHC_9026120  | OXSRI        | 2.749E-07 |  |           |           |  | OXSRI        |  |          |  |
| V3SVHSHC_9600848  | AREL1        | 2.755E-07 |  | 2.134E-07 |           |  | AREL1        |  | AREL1    |  |
| V3SVHSHC_8953388  | PABPC4L      | 2.830E-07 |  |           |           |  | PABPC4L      |  |          |  |
| V3SVHSHC_6525776  | RNF133       | 2.869E-07 |  |           |           |  | RNF133       |  |          |  |
| V3SVHSHC_8916395  | ATG16L2      | 3.129E-07 |  |           |           |  | ATG16L2      |  |          |  |
| V3SVHSHC_5441693  | ALLC         | 3.321E-07 |  |           |           |  | ALLC         |  |          |  |
| V3SVHSHC_7423112  | PPP1R2       | 3.475E-07 |  |           |           |  | PPP1R2       |  |          |  |
| V3SVHSHC_7340645  | DIRC2        | 3.550E-07 |  |           |           |  | DIRC2        |  |          |  |

|                   |              |           |           |           |           |  |              |        |         |      |
|-------------------|--------------|-----------|-----------|-----------|-----------|--|--------------|--------|---------|------|
| V3SVHSHC_10269362 | DNAJB12      | 3.665E-07 |           |           |           |  | DNAJB12      |        |         |      |
| V3SVHSHC_4774268  | MRPS36       | 3.743E-07 |           |           |           |  | MRPS36       |        |         |      |
| V3SVHSHC_10769906 | PPP1R12A     | 3.822E-07 |           |           |           |  | PPP1R12A     |        |         |      |
| V3SVHSHC_4821392  | GPR137B      | 3.844E-07 |           |           |           |  | GPR137B      |        |         |      |
| V3SVHSHC_6621542  | POU5F2       | 3.927E-07 |           |           |           |  | POU5F2       |        |         |      |
| V3SVHSHC_8885111  | PRR32        | 4.036E-07 |           |           |           |  | PRR32        |        |         |      |
| V3SVHSHC_8572172  | HMGB3        | 4.142E-07 |           |           |           |  | HMGB3        |        |         |      |
| V3SVHSHC_9085355  | LOC101928291 | 4.398E-07 |           |           |           |  | LOC101928291 |        |         |      |
| V3SVHSHC_9433769  | UQCRQ        | 4.476E-07 |           |           |           |  | UQCRQ        |        |         |      |
| V3SVHSHC_10047470 | SLC39A8      | 4.575E-07 |           | 3.454E-13 |           |  | SLC39A8      |        | SLC39A8 |      |
| V3SVHSHC_8891942  | ARMCX5       | 4.646E-07 | 3.231E-11 |           |           |  | ARMCX5       | ARMCX5 |         |      |
| V3SVHSHC_7324046  | RSRC1        | 4.739E-07 |           | 1.573E-17 |           |  | RSRC1        |        | RSRC1   |      |
| V3SVHSHC_4688138  | ZNF550       | 4.962E-07 |           |           | 4.316E-01 |  | ZNF550       |        |         |      |
| V3SVHSHC_6449150  | KCNG4        | 5.126E-07 |           |           |           |  | KCNG4        |        |         |      |
| V3SVHSHC_5836967  | MYT1         | 5.282E-07 |           |           | 3.354E-08 |  | MYT1         |        |         | MYT1 |
| V3SVHSHC_9972131  | DEFB115      | 5.957E-07 |           |           |           |  | DEFB115      |        |         |      |
| V3SVHSHC_6253031  | BPIFB2       | 5.981E-07 |           |           |           |  | BPIFB2       |        |         |      |
| V3SVHSHC_9179042  | MEGF10       | 6.066E-07 |           |           |           |  | MEGF10       |        |         |      |
| V3SVHSHC_10815446 | EDDM3A       | 6.084E-07 |           |           |           |  | EDDM3A       |        |         |      |
| V3SVHSHC_5779448  | FBLN2        | 6.090E-07 |           |           |           |  | FBLN2        |        |         |      |
| V3SVHSHC_9768950  | RAB33A       | 6.148E-07 |           |           |           |  | RAB33A       |        |         |      |
| V3SVHSHC_8717966  | ADAMTS19     | 6.365E-07 |           |           |           |  | ADAMTS19     |        |         |      |
| V3SVHSHC_5894585  | ZNF701       | 6.919E-07 |           |           |           |  | ZNF701       |        |         |      |
| V3SVHSHC_9458255  | MTRF1L       | 6.991E-07 |           |           |           |  | MTRF1L       |        |         |      |
| V3SVHSHC_8927978  | PRG4         | 7.009E-07 |           |           |           |  | PRG4         |        |         |      |
| V3SVHSHC_8416808  | POLL         | 7.024E-07 |           |           |           |  | POLL         |        |         |      |
| V3SVHSHC_7748162  | JAM3         | 7.037E-07 |           | 7.948E-08 |           |  | JAM3         |        | JAM3    |      |
| V3SVHSHC_4784300  | SMG9         | 7.081E-07 |           |           |           |  | SMG9         |        |         |      |
| V3SVHSHC_9879137  | SHBG         | 7.356E-07 |           |           | 9.545E-03 |  | SHBG         |        |         |      |
| V3SVHSHC_9736313  | OR4N2        | 7.367E-07 |           |           |           |  | OR4N2        |        |         |      |
| V3SVHSHC_10384070 | RUFY3        | 8.069E-07 |           |           | 3.848E-01 |  | RUFY3        |        |         |      |
| V3SVHSHC_5266034  | PAGE1        | 8.293E-07 |           |           |           |  | PAGE1        |        |         |      |
| V3SVHSHC_6556598  | TRIM34       | 8.787E-07 |           |           |           |  | TRIM34       |        |         |      |
| V3SVHSHC_4862411  | DSG2         | 8.833E-07 |           |           |           |  | DSG2         |        |         |      |
| V3SVHSHC_7916462  | LPL          | 9.422E-07 |           |           |           |  | LPL          |        |         |      |
| V3SVHSHC_8350049  | CHRD12       | 9.795E-07 |           | 1.536E-12 |           |  | CHRD12       |        | CHRD12  |      |
| V3SVHSHC_7490498  | ZNF665       | 9.796E-07 |           |           |           |  | ZNF665       |        |         |      |
| V3SVHSHC_7187426  | WDR72        | 9.797E-07 |           |           |           |  | WDR72        |        |         |      |
| V3SVHSHC_9752681  | FAM47A       | 1.079E-06 |           |           |           |  | FAM47A       |        |         |      |
| V3SVHSHC_6415688  | CDH19        | 1.142E-06 |           |           |           |  | CDH19        |        |         |      |
| V3SVHSHC_5502512  | HLA-F        | 1.254E-06 |           |           |           |  | HLA-F        |        |         |      |
| V3SVHSHC_7377572  | SLC38A9      | 1.256E-06 |           |           |           |  | SLC38A9      |        |         |      |
| V3SVHSHC_9364634  | CLK4         | 1.295E-06 |           |           |           |  | CLK4         |        |         |      |
| V3SVHSHC_7715393  | TMEM17       | 1.324E-06 |           |           |           |  | TMEM17       |        |         |      |
| V3SVHSHC_5047871  | GSTM5        | 1.387E-06 |           |           |           |  | GSTM5        |        |         |      |
| V3SVHSHC_6700577  | SKIV2L2      | 1.401E-06 |           |           |           |  | SKIV2L2      |        |         |      |
| V3SVHSHC_6312134  | ZNF572       | 1.405E-06 |           |           |           |  | ZNF572       |        |         |      |
| V3SVHSHC_10044038 | CNNM3        | 1.419E-06 |           |           |           |  | CNNM3        |        |         |      |
| V3SVHSHC_10450103 | MIR205HG     | 1.420E-06 |           |           |           |  | MIR205HG     |        |         |      |
| V3SVHSHC_5391104  | TROAP        | 1.505E-06 |           |           |           |  | TROAP        |        |         |      |
| V3SVHSHC_5244749  | SGSH         | 1.514E-06 |           |           |           |  | SGSH         |        |         |      |
| V3SVHSHC_8626292  | ZCCHC10      | 1.537E-06 |           |           |           |  | ZCCHC10      |        |         |      |
| V3SVHSHC_8544518  | MF12         | 1.651E-06 | 2.232E-23 |           |           |  | MF12         | MF12   |         |      |
| V3SVHSHC_10458551 | ZNF615       | 1.698E-06 |           |           |           |  | ZNF615       |        |         |      |

|                   |              |           |           |           |           |  |              |       |        |       |
|-------------------|--------------|-----------|-----------|-----------|-----------|--|--------------|-------|--------|-------|
| V3SVHSHC_10079909 | ING1         | 1.706E-06 |           |           |           |  | ING1         |       |        |       |
| V3SVHSHC_5010020  | CNOT11       | 1.834E-06 |           |           |           |  | CNOT11       |       |        |       |
| V3SVHSHC_9989192  | PVALB        | 1.994E-06 |           |           |           |  | PVALB        |       |        |       |
| V3SVHSHC_9152840  | Snmp70       | 2.065E-06 |           |           |           |  | Snmp70       |       |        |       |
| V3SVHSHC_5906399  | GPRC5B       | 2.111E-06 |           |           |           |  | GPRC5B       |       |        |       |
| V3SVHSHC_7416446  | MTHFD2L      | 2.162E-06 |           |           |           |  | MTHFD2L      |       |        |       |
| V3SVHSHC_5269301  | PLBD1        | 2.200E-06 |           |           |           |  | PLBD1        |       |        |       |
| V3SVHSHC_6703151  | PIGT         | 2.219E-06 |           |           |           |  | PIGT         |       |        |       |
| V3SVHSHC_5228183  | CXCL1        | 2.238E-06 |           |           |           |  | CXCL1        |       |        |       |
| V3SVHSHC_7835249  | OR5AS1       | 2.259E-06 |           |           |           |  | OR5AS1       |       |        |       |
| V3SVHSHC_10160099 | SMAD1        | 2.322E-06 |           |           |           |  | SMAD1        |       |        |       |
| V3SVHSHC_4713614  | CDC37        | 2.367E-06 |           |           |           |  | CDC37        |       |        |       |
| V3SVHSHC_10646618 | P4HB         | 2.452E-06 |           |           |           |  | P4HB         |       |        |       |
| V3SVHSHC_6600389  | LGI1         | 2.456E-06 |           |           |           |  | LGI1         |       |        |       |
| V3SVHSHC_9082352  | NOMO2        | 2.511E-06 |           |           |           |  | NOMO2        |       |        |       |
| V3SVHSHC_5909105  | NDUFB11      | 2.597E-06 |           |           |           |  | NDUFB11      |       |        |       |
| V3SVHSHC_6587420  | RASSF10      | 2.673E-06 |           |           |           |  | RASSF10      |       |        |       |
| V3SVHSHC_9860459  | MNDA         | 2.703E-06 |           |           |           |  | MNDA         |       |        |       |
| V3SVHSHC_5647844  | RHPN1        | 2.780E-06 |           |           |           |  | RHPN1        |       |        |       |
| V3SVHSHC_9540128  | PRMT9        | 2.950E-06 |           |           | 5.828E-19 |  | PRMT9        |       |        | PRMT9 |
| V3SVHSHC_8705129  | SGSH         | 2.962E-06 |           |           |           |  | SGSH         |       |        |       |
| V3SVHSHC_9736280  | LRR8E        | 3.040E-06 |           |           |           |  | LRR8E        |       |        |       |
| V3SVHSHC_5187428  | SHANK1       | 3.049E-06 |           |           |           |  | SHANK1       |       |        |       |
| V3SVHSHC_9962990  | PPP1R14D     | 3.125E-06 |           |           |           |  | PPP1R14D     |       |        |       |
| V3SVHSHC_4702328  | LCN2         | 3.164E-06 |           |           |           |  | LCN2         |       |        |       |
| V3SVHSHC_5259467  | MAFG         | 3.184E-06 |           |           |           |  | MAFG         |       |        |       |
| V3SVHSHC_6472184  | LRP10        | 3.237E-06 |           |           |           |  | LRP10        |       |        |       |
| V3SVHSHC_9966026  | RNF150       | 3.542E-06 |           |           |           |  | RNF150       |       |        |       |
| V3SVHSHC_6072587  | MILR1        | 3.584E-06 |           |           |           |  | MILR1        |       |        |       |
| V3SVHSHC_8976125  | IRX5         | 3.668E-06 |           |           |           |  | IRX5         |       |        |       |
| V3SVHSHC_7144262  | HIST2H2AA4   | 3.822E-06 |           |           |           |  | HIST2H2AA4   |       |        |       |
| V3SVHSHC_10432778 | PALMD        | 3.902E-06 | 2.370E-04 |           |           |  | PALMD        | PALMD |        |       |
| V3SVHSHC_5902901  | SYT13        | 3.909E-06 |           |           |           |  | SYT13        |       |        |       |
| V3SVHSHC_7629560  | COL3A1       | 4.001E-06 |           | 2.279E-06 |           |  | COL3A1       |       | COL3A1 |       |
| V3SVHSHC_9163136  | USP51        | 4.116E-06 |           |           |           |  | USP51        |       |        |       |
| V3SVHSHC_10427432 | LACE1        | 4.201E-06 |           |           |           |  | LACE1        |       |        |       |
| V3SVHSHC_8489078  | UCHL5        | 4.241E-06 |           |           |           |  | UCHL5        |       |        |       |
| V3SVHSHC_9740999  | DAXX         | 4.378E-06 |           |           |           |  | DAXX         |       |        |       |
| V3SVHSHC_5506340  | ADD3         | 4.437E-06 |           |           |           |  | ADD3         |       |        |       |
| V3SVHSHC_9435881  | WDR62        | 4.788E-06 |           |           |           |  | WDR62        |       |        |       |
| V3SVHSHC_8327279  | PSMD12       | 5.380E-06 |           |           |           |  | PSMD12       |       |        |       |
| V3SVHSHC_6035132  | FGF13        | 5.521E-06 |           |           |           |  | FGF13        |       |        |       |
| V3SVHSHC_8300351  | NPPB         | 5.579E-06 |           |           |           |  | NPPB         |       |        |       |
| V3SVHSHC_7828649  | C17orf67     | 5.673E-06 |           |           |           |  | C17orf67     |       |        |       |
| V3SVHSHC_10592696 | ODAM         | 5.938E-06 |           |           |           |  | ODAM         |       |        |       |
| V3SVHSHC_4978241  | FAM96B       | 6.135E-06 |           |           |           |  | FAM96B       |       |        |       |
| V3SVHSHC_9820859  | POLR2K       | 6.373E-06 |           |           |           |  | POLR2K       |       |        |       |
| V3SVHSHC_9001370  | LOC101929748 | 6.410E-06 |           |           |           |  | LOC101929748 |       |        |       |
| V3SVHSHC_6244187  | SRRM4        | 6.674E-06 |           |           |           |  | SRRM4        |       |        |       |
| V3SVHSHC_5156606  | Ccdc39       | 6.800E-06 |           |           |           |  | Ccdc39       |       |        |       |
| V3SVHSHC_9083243  | GABRA6       | 6.821E-06 |           |           |           |  | GABRA6       |       |        |       |
| V3SVHSHC_7112483  | IFNA10       | 7.073E-06 |           |           |           |  | IFNA10       |       |        |       |
| V3SVHSHC_6799346  | ABR          | 7.504E-06 |           |           |           |  | ABR          |       |        |       |
| V3SVHSHC_7818782  | NAP1L1       | 7.607E-06 |           |           |           |  | NAP1L1       |       |        |       |



|                   |              |           |           |           |           |  |              |              |      |              |
|-------------------|--------------|-----------|-----------|-----------|-----------|--|--------------|--------------|------|--------------|
| V3SVHSHC_9996155  | LSM5         | 7.696E-06 |           |           |           |  | LSM5         |              |      |              |
| V3SVHSHC_5732456  | AKTIP        | 7.754E-06 |           |           |           |  | AKTIP        |              |      |              |
| V3SVHSHC_7495811  | C12orf57     | 8.011E-06 |           |           |           |  | C12orf57     |              |      |              |
| V3SVHSHC_9036944  | TBC1D4       | 8.196E-06 |           |           |           |  | TBC1D4       |              |      |              |
| V3SVHSHC_5406614  | IGLL5        | 8.287E-06 |           |           |           |  | IGLL5        |              |      |              |
| V3SVHSHC_5159807  | SPOCD1       | 9.107E-06 |           |           |           |  | SPOCD1       |              |      |              |
| V3SVHSHC_10681268 | CHST5        | 1.010E-05 |           |           |           |  | CHST5        |              |      |              |
| V3SVHSHC_6538712  | ZSCAN32      | 1.049E-05 |           |           |           |  | ZSCAN32      |              |      |              |
| V3SVHSHC_7117136  | CD160        | 1.117E-05 |           |           |           |  | CD160        |              |      |              |
| V3SVHSHC_6492743  | LOC101927989 | 1.123E-05 |           |           |           |  | LOC101927989 |              |      |              |
| V3SVHSHC_6433178  | SLC10A2      | 1.165E-05 |           |           |           |  | SLC10A2      |              |      |              |
| V3SVHSHC_7712291  | MANSC1       | 1.199E-05 |           |           |           |  | MANSC1       |              |      |              |
| V3SVHSHC_6261182  | DYNAP        | 1.209E-05 |           |           |           |  | DYNAP        |              |      |              |
| V3SVHSHC_6094070  | GYG1         | 1.276E-05 |           |           |           |  | GYG1         |              |      |              |
| V3SVHSHC_9078887  | TBPL2        | 1.278E-05 |           |           |           |  | TBPL2        |              |      |              |
| V3SVHSHC_10422416 | SLC12A1      | 1.299E-05 |           |           |           |  | SLC12A1      |              |      |              |
| V3SVHSHC_7600454  | CCDC178      | 1.323E-05 |           |           |           |  | CCDC178      |              |      |              |
| V3SVHSHC_5602172  | BSND         | 1.336E-05 |           |           |           |  | BSND         |              |      |              |
| V3SVHSHC_9629657  | FKBP3        | 1.391E-05 |           |           |           |  | FKBP3        |              |      |              |
| V3SVHSHC_9211250  | CCDC140      | 1.437E-05 |           |           |           |  | CCDC140      |              |      |              |
| V3SVHSHC_10085354 | IRF2         | 1.522E-05 |           |           |           |  | IRF2         |              |      |              |
| V3SVHSHC_6677477  | PFAS         | 1.535E-05 |           |           |           |  | PFAS         |              |      |              |
| V3SVHSHC_5855480  | GABRP        | 1.573E-05 |           |           |           |  | GABRP        |              |      |              |
| V3SVHSHC_10388129 | MANEA        | 1.636E-05 |           |           |           |  | MANEA        |              |      |              |
| V3SVHSHC_5109746  | F8A3         | 1.677E-05 |           |           |           |  | F8A3         |              |      |              |
| V3SVHSHC_8932235  | VWA5B1       | 1.857E-05 |           |           |           |  | VWA5B1       |              |      |              |
| V3SVHSHC_6260159  | HRASLS5      | 1.960E-05 |           |           |           |  | HRASLS5      |              |      |              |
| V3SVHSHC_9006617  | LOC101060604 | 2.021E-05 |           |           |           |  | LOC101060604 |              |      |              |
| V3SVHSHC_10785779 | GPR132       | 2.061E-05 |           |           |           |  | GPR132       |              |      |              |
| V3SVHSHC_8259794  | GJC1         | 2.075E-05 |           |           |           |  | GJC1         |              |      |              |
| V3SVHSHC_8112977  | TWF2         | 2.093E-05 |           |           |           |  | TWF2         |              |      |              |
| V3SVHSHC_8100767  | Llph         | 2.109E-05 |           |           |           |  | Llph         |              |      |              |
| V3SVHSHC_9291473  | DCTN2        | 2.325E-05 |           |           |           |  | DCTN2        |              |      |              |
| V3SVHSHC_10091096 | DNM3         | 2.427E-05 |           |           |           |  | DNM3         |              |      |              |
| V3SVHSHC_4756910  | CDH18        | 2.438E-05 |           |           |           |  | CDH18        |              |      |              |
| V3SVHSHC_5480171  | USP37        | 2.438E-05 |           |           |           |  | USP37        |              |      |              |
| V3SVHSHC_9119708  | BSN          | 2.468E-05 |           |           |           |  | BSN          |              |      |              |
| V3SVHSHC_4953128  | LOC101929725 | 2.499E-05 | 2.356E-10 |           | 6.488E-07 |  | LOC101929725 | LOC101929725 |      | LOC101929725 |
| V3SVHSHC_10590650 | Efcab9       | 2.655E-05 |           |           |           |  | Efcab9       |              |      |              |
| V3SVHSHC_5126840  | ETNK1        | 2.701E-05 |           |           |           |  | ETNK1        |              |      |              |
| V3SVHSHC_10328729 | TRAPPC9      | 2.917E-05 |           |           |           |  | TRAPPC9      |              |      |              |
| V3SVHSHC_5897984  | C17orf62     | 3.019E-05 |           |           |           |  | C17orf62     |              |      |              |
| V3SVHSHC_9770831  | KIAA1755     | 3.056E-05 |           |           |           |  | KIAA1755     |              |      |              |
| V3SVHSHC_9500825  | OR2M3        | 3.459E-05 |           |           |           |  | OR2M3        |              |      |              |
| V3SVHSHC_10374368 | ZNF8         | 3.582E-05 |           | 6.330E-06 |           |  | ZNF8         |              | ZNF8 |              |
| V3SVHSHC_9568871  | PPARD        | 3.596E-05 |           |           |           |  | PPARD        |              |      |              |
| V3SVHSHC_7839110  | TULP4        | 3.600E-05 | 4.828E-06 |           |           |  | TULP4        | TULP4        |      |              |
| V3SVHSHC_10774097 | HRH3         | 3.704E-05 |           |           |           |  | HRH3         |              |      |              |
| V3SVHSHC_10164917 | ZDHHC2       | 3.801E-05 |           |           |           |  | ZDHHC2       |              |      |              |
| V3SVHSHC_5227259  | SNX8         | 3.875E-05 |           |           |           |  | SNX8         |              |      |              |
| V3SVHSHC_9845048  | PLP1         | 4.223E-05 |           |           |           |  | PLP1         |              |      |              |
| V3SVHSHC_5466179  | MTG2         | 4.229E-05 |           |           |           |  | MTG2         |              |      |              |
| V3SVHSHC_10238210 | OR52L1       | 4.406E-05 |           |           |           |  | OR52L1       |              |      |              |

|                   |                 |           |           |           |           |  |                 |       |       |  |
|-------------------|-----------------|-----------|-----------|-----------|-----------|--|-----------------|-------|-------|--|
| V3SVHSHC_5609102  | SMARCD3         | 4.412E-05 |           |           |           |  | SMARCD3         |       |       |  |
| V3SVHSHC_8333153  | C19orf38        | 4.439E-05 |           |           |           |  | C19orf38        |       |       |  |
| V3SVHSHC_5733182  | NCR3            | 4.512E-05 |           |           |           |  | NCR3            |       |       |  |
| V3SVHSHC_8368859  | MAGEA1          | 4.544E-05 |           |           |           |  | MAGEA1          |       |       |  |
| V3SVHSHC_9261047  | DMD             | 4.685E-05 |           |           |           |  | DMD             |       |       |  |
| V3SVHSHC_4662827  | SLC2A11         | 5.118E-05 |           |           |           |  | SLC2A11         |       |       |  |
| V3SVHSHC_10619096 | S100A7          | 5.322E-05 |           |           |           |  | S100A7          |       |       |  |
| V3SVHSHC_9939329  | FGFBP2          | 5.334E-05 |           |           |           |  | FGFBP2          |       |       |  |
| V3SVHSHC_4698104  | KCNAB3          | 5.403E-05 |           |           |           |  | KCNAB3          |       |       |  |
| V3SVHSHC_6923492  | RPL6            | 5.644E-05 |           |           |           |  | RPL6            |       |       |  |
| V3SVHSHC_4863896  | LOC101060341    | 5.682E-05 |           |           |           |  | LOC101060341    |       |       |  |
| V3SVHSHC_10376282 | PODXL           | 5.715E-05 |           |           |           |  | PODXL           |       |       |  |
| V3SVHSHC_5362295  | ZGRF1           | 6.140E-05 |           |           |           |  | ZGRF1           |       |       |  |
| V3SVHSHC_9736643  | Apobr           | 6.228E-05 |           |           |           |  | Apobr           |       |       |  |
| V3SVHSHC_9775517  | ZMAT2           | 6.311E-05 |           |           |           |  | ZMAT2           |       |       |  |
| V3SVHSHC_6866039  | SCML2           | 6.784E-05 |           |           |           |  | SCML2           |       |       |  |
| V3SVHSHC_7299263  | GDF6            | 6.904E-05 |           |           |           |  | GDF6            |       |       |  |
| V3SVHSHC_5230955  | PSMD10          | 6.978E-05 |           |           |           |  | PSMD10          |       |       |  |
| V3SVHSHC_8836007  | RNF182          | 7.041E-05 |           |           |           |  | RNF182          |       |       |  |
| V3SVHSHC_10041134 | GRIN2B          | 7.097E-05 |           |           |           |  | GRIN2B          |       |       |  |
| V3SVHSHC_6641012  | TNFAIP8L2-SCNM1 | 7.599E-05 |           |           |           |  | TNFAIP8L2-SCNM1 |       |       |  |
| V3SVHSHC_5996852  | ZBED3           | 7.819E-05 |           | 9.356E-15 |           |  | ZBED3           |       | ZBED3 |  |
| V3SVHSHC_9693677  | DAGLA           | 7.831E-05 |           |           |           |  | DAGLA           |       |       |  |
| V3SVHSHC_9209666  | C1orf198        | 8.072E-05 |           |           |           |  | C1orf198        |       |       |  |
| V3SVHSHC_9663614  | FNDC3A          | 8.200E-05 |           |           |           |  | FNDC3A          |       |       |  |
| V3SVHSHC_9554681  | IL23A           | 8.208E-05 | 3.676E-07 |           |           |  | IL23A           | IL23A |       |  |
| V3SVHSHC_5578115  | OAS1            | 8.230E-05 |           |           |           |  | OAS1            |       |       |  |
| V3SVHSHC_7386284  | MPO             | 9.330E-05 | 1.204E-06 |           |           |  | MPO             | MPO   |       |  |
| V3SVHSHC_6855809  | APMAP           | 9.605E-05 |           |           |           |  | APMAP           |       |       |  |
| V3SVHSHC_10763636 | C17orf112       | 9.774E-05 |           |           |           |  | C17orf112       |       |       |  |
| V3SVHSHC_6261776  | SPATA31D1       | 9.846E-05 |           |           | 4.018E-01 |  | SPATA31D1       |       |       |  |
| V3SVHSHC_5126213  | GRB10           | 1.013E-04 |           |           |           |  | GRB10           |       |       |  |
| V3SVHSHC_9609131  | PIGC            | 1.020E-04 |           |           |           |  | PIGC            |       |       |  |
| V3SVHSHC_5091233  | APBB1           | 1.048E-04 |           |           |           |  | APBB1           |       |       |  |
| V3SVHSHC_6617285  | FIGNL1          | 1.094E-04 |           |           |           |  | FIGNL1          |       |       |  |
| V3SVHSHC_10820891 | LCE5A           | 1.167E-04 |           |           |           |  | LCE5A           |       |       |  |
| V3SVHSHC_9192242  | C22orf24        | 1.226E-04 |           |           |           |  | C22orf24        |       |       |  |
| V3SVHSHC_9486932  | LOC100288966    | 1.256E-04 |           |           |           |  | LOC100288966    |       |       |  |
| V3SVHSHC_7091891  | C1QTNF4         | 1.293E-04 |           |           |           |  | C1QTNF4         |       |       |  |
| V3SVHSHC_8585999  | PTGES3L         | 1.294E-04 |           |           |           |  | PTGES3L         |       |       |  |
| V3SVHSHC_5044241  | SAFB            | 1.327E-04 |           |           |           |  | SAFB            |       |       |  |
| V3SVHSHC_10634507 | Spns1           | 1.415E-04 |           |           |           |  | Spns1           |       |       |  |
| V3SVHSHC_10405751 | TIMM17B         | 1.461E-04 |           |           |           |  | TIMM17B         |       |       |  |
| V3SVHSHC_7144592  | NR1H4           | 1.497E-04 |           |           |           |  | NR1H4           |       |       |  |
| V3SVHSHC_5925869  | FOXA1           | 1.501E-04 |           |           |           |  | FOXA1           |       |       |  |
| V3SVHSHC_7157924  | KDR             | 1.543E-04 |           |           |           |  | KDR             |       |       |  |
| V3SVHSHC_8914646  | TMCO4           | 1.640E-04 |           |           |           |  | TMCO4           |       |       |  |
| V3SVHSHC_8668301  | MIEN1           | 1.675E-04 |           |           |           |  | MIEN1           |       |       |  |
| V3SVHSHC_10382981 | CNTNAP4         | 1.766E-04 |           |           |           |  | CNTNAP4         |       |       |  |
| V3SVHSHC_7806044  | SUN3            | 1.789E-04 |           |           |           |  | SUN3            |       |       |  |
| V3SVHSHC_8195279  | OR4D9           | 1.894E-04 |           |           |           |  | OR4D9           |       |       |  |
| V3SVHSHC_7776245  | ADAMTS3         | 1.906E-04 |           |           |           |  | ADAMTS3         |       |       |  |
| V3SVHSHC_9482642  | NBPF14          | 1.912E-04 |           |           |           |  | NBPF14          |       |       |  |

|                   |           |           |           |           |           |  |           |       |          |  |
|-------------------|-----------|-----------|-----------|-----------|-----------|--|-----------|-------|----------|--|
| V3SVHSHC_10582334 | LCAT      | 1.960E-04 |           |           |           |  | LCAT      |       |          |  |
| V3SVHSHC_9760964  | GSG1      | 1.974E-04 |           |           |           |  | GSG1      |       |          |  |
| V3SVHSHC_10333151 | ATIC      | 1.978E-04 |           |           |           |  | ATIC      |       |          |  |
| V3SVHSHC_10232600 | FREM1     | 2.028E-04 |           |           |           |  | FREM1     |       |          |  |
| V3SVHSHC_5996654  | CD68      | 2.143E-04 |           |           |           |  | CD68      |       |          |  |
| V3SVHSHC_10060373 | TMEM147   | 2.157E-04 |           |           |           |  | TMEM147   |       |          |  |
| V3SVHSHC_7306028  | FABP5     | 2.310E-04 |           |           |           |  | FABP5     |       |          |  |
| V3SVHSHC_6490697  | ZBTB7A    | 2.512E-04 |           |           |           |  | ZBTB7A    |       |          |  |
| V3SVHSHC_6507659  | HIST1H2BA | 2.579E-04 |           |           |           |  | HIST1H2BA |       |          |  |
| V3SVHSHC_10276787 | PLCB4     | 2.753E-04 |           |           |           |  | PLCB4     |       |          |  |
| V3SVHSHC_5156375  | PPIP5K2   | 2.851E-04 |           |           |           |  | PPIP5K2   |       |          |  |
| V3SVHSHC_10375094 | TP53I11   | 2.909E-04 |           |           |           |  | TP53I11   |       |          |  |
| V3SVHSHC_6396548  | TSEN34    | 2.964E-04 |           |           |           |  | TSEN34    |       |          |  |
| V3SVHSHC_8950946  | SLC22A24  | 2.979E-04 |           |           |           |  | SLC22A24  |       |          |  |
| V3SVHSHC_10708163 | ADSS      | 3.007E-04 |           |           |           |  | ADSS      |       |          |  |
| V3SVHSHC_5069354  | Hrct1     | 3.051E-04 |           |           |           |  | Hrct1     |       |          |  |
| V3SVHSHC_9433076  | REG1A     | 3.333E-04 |           |           |           |  | REG1A     |       |          |  |
| V3SVHSHC_9871283  | ANAPC2    | 3.435E-04 |           |           |           |  | ANAPC2    |       |          |  |
| V3SVHSHC_5496605  | DOPEY1    | 3.481E-04 |           |           |           |  | DOPEY1    |       |          |  |
| V3SVHSHC_8493401  | BRINP2    | 3.517E-04 |           |           | 2.301E-01 |  | BRINP2    |       |          |  |
| V3SVHSHC_7055393  | COA6      | 3.585E-04 |           |           |           |  | COA6      |       |          |  |
| V3SVHSHC_6218909  | PSME4     | 3.694E-04 |           |           |           |  | PSME4     |       |          |  |
| V3SVHSHC_10451819 | IFNA1     | 3.739E-04 |           |           |           |  | IFNA1     |       |          |  |
| V3SVHSHC_10528511 | GNL3      | 3.794E-04 |           |           |           |  | GNL3      |       |          |  |
| V3SVHSHC_5164196  | OR5AP2    | 3.859E-04 |           |           |           |  | OR5AP2    |       |          |  |
| V3SVHSHC_8456969  | GUCA1B    | 3.863E-04 |           |           |           |  | GUCA1B    |       |          |  |
| V3SVHSHC_8005100  | EMD       | 3.952E-04 |           |           |           |  | EMD       |       |          |  |
| V3SVHSHC_4772552  | OR2AG2    | 4.210E-04 |           |           |           |  | OR2AG2    |       |          |  |
| V3SVHSHC_6115190  | MTERFD1   | 4.272E-04 |           | 2.036E-16 |           |  | MTERFD1   |       | MTERFD1  |  |
| V3SVHSHC_9418259  | KIAA0513  | 4.302E-04 |           |           |           |  | KIAA0513  |       |          |  |
| V3SVHSHC_4634018  | OR52L1    | 4.448E-04 |           |           |           |  | OR52L1    |       |          |  |
| V3SVHSHC_7599959  | CD37      | 4.536E-04 |           |           |           |  | CD37      |       |          |  |
| V3SVHSHC_10217717 | MXRA8     | 4.642E-04 |           |           |           |  | MXRA8     |       |          |  |
| V3SVHSHC_4728827  | FST       | 5.169E-04 |           |           |           |  | FST       |       |          |  |
| V3SVHSHC_7332758  | PPP3CB    | 5.313E-04 |           |           |           |  | PPP3CB    |       |          |  |
| V3SVHSHC_9087137  | XRCC4     | 5.996E-04 |           |           |           |  | XRCC4     |       |          |  |
| V3SVHSHC_9402551  | GPATCH2L  | 6.008E-04 |           | 4.958E-11 |           |  | GPATCH2L  |       | GPATCH2L |  |
| V3SVHSHC_7872176  | F7        | 6.191E-04 |           |           | 2.945E-01 |  | F7        |       |          |  |
| V3SVHSHC_6823271  | BRINP1    | 6.291E-04 |           |           |           |  | BRINP1    |       |          |  |
| V3SVHSHC_10091591 | WFDC8     | 6.482E-04 |           |           |           |  | WFDC8     |       |          |  |
| V3SVHSHC_6035396  | MTERFD2   | 6.505E-04 |           |           |           |  | MTERFD2   |       |          |  |
| V3SVHSHC_8443934  | ZNF658    | 6.535E-04 |           |           |           |  | ZNF658    |       |          |  |
| V3SVHSHC_4801658  | CECR2     | 6.600E-04 | 9.594E-12 |           |           |  | CECR2     | CECR2 |          |  |
| V3SVHSHC_9989159  | LIPT2     | 6.624E-04 |           |           |           |  | LIPT2     |       |          |  |
| V3SVHSHC_9761591  | ZSCAN16   | 6.749E-04 |           |           |           |  | ZSCAN16   |       |          |  |
| V3SVHSHC_8257682  | KIF2B     | 6.946E-04 |           |           |           |  | KIF2B     |       |          |  |
| V3SVHSHC_8605601  | STRIP2    | 7.069E-04 |           | 3.175E-03 | 1.680E-02 |  | STRIP2    |       |          |  |
| V3SVHSHC_6847097  | STARD6    | 7.223E-04 |           |           |           |  | STARD6    |       |          |  |
| V3SVHSHC_5012495  | SRPK3     | 7.241E-04 |           |           |           |  | SRPK3     |       |          |  |
| V3SVHSHC_8759480  | TOR3A     | 7.490E-04 |           |           |           |  | TOR3A     |       |          |  |
| V3SVHSHC_8112152  | ADAL      | 7.677E-04 |           |           |           |  | ADAL      |       |          |  |
| V3SVHSHC_10636949 | RPL39L    | 7.753E-04 |           |           |           |  | RPL39L    |       |          |  |
| V3SVHSHC_10260386 | TWF1      | 7.757E-04 |           |           |           |  | TWF1      |       |          |  |
| V3SVHSHC_7457267  | F2        | 7.869E-04 |           | 1.162E-10 | 4.604E-01 |  | F2        |       | F2       |  |

|                   |              |           |           |           |           |  |      |          |        |  |
|-------------------|--------------|-----------|-----------|-----------|-----------|--|------|----------|--------|--|
| V3SVHSHC_5156177  | BRDT         | 7.972E-04 |           |           |           |  | BRDT |          |        |  |
| V3SVHSHC_10242401 | RIN3         | 8.028E-04 |           |           |           |  |      |          |        |  |
| V3SVHSHC_8209205  | CD276        | 8.113E-04 |           |           |           |  |      |          |        |  |
| V3SVHSHC_9584150  | PDGFRB       | 8.208E-04 |           |           |           |  |      |          |        |  |
| V3SVHSHC_6103607  | TMEM30B      | 8.650E-04 |           |           | 1.501E-01 |  |      |          |        |  |
| V3SVHSHC_7521947  | SEC63        | 8.884E-04 |           |           |           |  |      |          |        |  |
| V3SVHSHC_8811818  | NCAM1        | 9.209E-04 |           |           |           |  |      |          |        |  |
| V3SVHSHC_8678960  | MYCBP2       | 9.318E-04 |           |           |           |  |      |          |        |  |
| V3SVHSHC_6082388  | ASB15        | 9.339E-04 |           |           |           |  |      |          |        |  |
| V3SVHSHC_10717502 | OLFML2A      | 9.380E-04 |           |           |           |  |      |          |        |  |
| V3SVHSHC_6704801  | TBC1D10C     | 1.032E-03 | 1.446E-06 |           |           |  |      | TBC1D10C |        |  |
| V3SVHSHC_8275997  | PAOX         | 1.037E-03 |           |           |           |  |      |          |        |  |
| V3SVHSHC_4761596  | APOOL        | 1.061E-03 |           |           |           |  |      |          |        |  |
| V3SVHSHC_9805613  | ESX1         | 1.080E-03 |           |           |           |  |      |          |        |  |
| V3SVHSHC_7053842  | DEFB123      | 1.083E-03 |           |           |           |  |      |          |        |  |
| V3SVHSHC_8767796  | KHK          | 1.120E-03 | 2.499E-01 | 2.305E-15 | 7.973E-02 |  |      |          | KHK    |  |
| V3SVHSHC_4691867  | RPS3         | 1.138E-03 |           |           |           |  |      |          |        |  |
| V3SVHSHC_5848781  | LOC100996634 | 1.233E-03 |           |           |           |  |      |          |        |  |
| V3SVHSHC_10696085 | ZNF304       | 1.249E-03 |           | 4.339E-07 |           |  |      |          | ZNF304 |  |
| V3SVHSHC_9770666  | LOC100653225 | 1.281E-03 |           |           |           |  |      |          |        |  |
| V3SVHSHC_4871585  | C16ORF3      | 1.355E-03 |           |           |           |  |      |          |        |  |
| V3SVHSHC_8064467  | ZNF34        | 1.360E-03 |           |           |           |  |      |          |        |  |
| V3SVHSHC_4964447  | ZBTB9        | 1.387E-03 |           |           |           |  |      |          |        |  |
| V3SVHSHC_5624348  | KRT27        | 1.458E-03 |           |           |           |  |      |          |        |  |
| V3SVHSHC_9197654  | SHE          | 1.486E-03 |           |           |           |  |      |          |        |  |
| V3SVHSHC_8320646  | DCLK2        | 1.502E-03 |           |           |           |  |      |          |        |  |
| V3SVHSHC_5578973  | LIPA         | 1.507E-03 |           |           |           |  |      |          |        |  |
| V3SVHSHC_9044435  | CD22         | 1.625E-03 |           |           |           |  |      |          |        |  |
| V3SVHSHC_5417768  | CAMK2D       | 1.642E-03 |           |           |           |  |      |          |        |  |
| V3SVHSHC_6741266  | ACSM2A       | 1.648E-03 |           |           |           |  |      |          |        |  |
| V3SVHSHC_10550324 | CD1E         | 1.657E-03 |           |           |           |  |      |          |        |  |
| V3SVHSHC_7261709  | RPL10A       | 1.665E-03 |           |           |           |  |      |          |        |  |
| V3SVHSHC_8937581  | USP9X        | 1.708E-03 |           |           |           |  |      |          |        |  |
| V3SVHSHC_10021037 | OR7D4        | 1.727E-03 |           |           |           |  |      |          |        |  |
| V3SVHSHC_9060803  | MORN4        | 1.748E-03 |           |           |           |  |      |          |        |  |
| V3SVHSHC_7584713  | TMEM181      | 1.772E-03 |           |           |           |  |      |          |        |  |
| V3SVHSHC_5099285  | SLITRK5      | 1.819E-03 |           |           |           |  |      |          |        |  |
| V3SVHSHC_5452121  | SLC2A9       | 1.835E-03 |           |           |           |  |      |          |        |  |
| V3SVHSHC_9613982  | FAM76B       | 1.839E-03 |           |           |           |  |      |          |        |  |
| V3SVHSHC_10637675 | STK11        | 1.843E-03 |           |           |           |  |      |          |        |  |
| V3SVHSHC_7358663  | OVOS         | 1.976E-03 |           |           |           |  |      |          |        |  |
| V3SVHSHC_7429514  | TSPAN12      | 1.999E-03 |           |           |           |  |      |          |        |  |
| V3SVHSHC_8474855  | DERL2        | 2.006E-03 |           | 2.433E-10 |           |  |      |          | DERL2  |  |
| V3SVHSHC_7983485  | TIMM21       | 2.105E-03 |           |           |           |  |      |          |        |  |
| V3SVHSHC_7154756  | GRPEL2       | 2.135E-03 |           |           |           |  |      |          |        |  |
| V3SVHSHC_9351236  | STOM         | 2.165E-03 |           |           |           |  |      |          |        |  |
| V3SVHSHC_6770999  | OR9Q2        | 2.173E-03 |           |           |           |  |      |          |        |  |
| V3SVHSHC_9026450  | LOC101928282 | 2.174E-03 |           |           |           |  |      |          |        |  |
| V3SVHSHC_9191846  | USP17L15     | 2.282E-03 | 1.141E-04 |           |           |  |      | USP17L15 |        |  |
| V3SVHSHC_5603459  | IGFL4        | 2.292E-03 |           |           |           |  |      |          |        |  |
| V3SVHSHC_9460070  | NUDCD3       | 2.318E-03 |           |           |           |  |      |          |        |  |
| V3SVHSHC_10113767 | TFAP2B       | 2.334E-03 |           |           |           |  |      |          |        |  |
| V3SVHSHC_4837001  | SLC25A34     | 2.386E-03 |           |           |           |  |      |          |        |  |
| V3SVHSHC_6228578  | ALG14        | 2.412E-03 |           |           |           |  |      |          |        |  |

|                   |              |           |           |           |           |  |  |          |          |  |
|-------------------|--------------|-----------|-----------|-----------|-----------|--|--|----------|----------|--|
| V3SVHSHC_6029753  | MST1L        | 2.439E-03 |           |           |           |  |  |          |          |  |
| V3SVHSHC_6449942  | ADAMTS8      | 2.482E-03 |           |           |           |  |  |          |          |  |
| V3SVHSHC_9342458  | OR52A5       | 2.537E-03 |           |           |           |  |  |          |          |  |
| V3SVHSHC_10836731 | RRP15        | 2.550E-03 |           |           |           |  |  |          |          |  |
| V3SVHSHC_8262368  | CCR9         | 2.610E-03 |           |           |           |  |  |          |          |  |
| V3SVHSHC_10724993 | DYM          | 2.632E-03 |           |           |           |  |  |          |          |  |
| V3SVHSHC_10512044 | CCDC121      | 2.693E-03 |           |           |           |  |  |          |          |  |
| V3SVHSHC_6033086  | LYSMD1       | 2.809E-03 |           |           |           |  |  |          |          |  |
| V3SVHSHC_5179970  | CENPO        | 2.937E-03 |           |           |           |  |  |          |          |  |
| V3SVHSHC_7498979  | PAPLN        | 2.937E-03 |           | 2.690E-01 |           |  |  |          |          |  |
| V3SVHSHC_7955006  | TRAIP        | 2.976E-03 |           |           | 2.812E-01 |  |  |          |          |  |
| V3SVHSHC_6419252  | SS18         | 3.037E-03 |           |           |           |  |  |          |          |  |
| V3SVHSHC_6278837  | ZNF322       | 3.071E-03 |           |           |           |  |  |          |          |  |
| V3SVHSHC_10322360 | RNF212       | 3.123E-03 |           |           |           |  |  |          |          |  |
| V3SVHSHC_4920458  | AURKA        | 3.135E-03 |           | 3.853E-01 |           |  |  |          |          |  |
| V3SVHSHC_7039520  | TOMM20       | 3.179E-03 |           |           |           |  |  |          |          |  |
| V3SVHSHC_9391595  | CHKB         | 3.222E-03 |           |           |           |  |  |          |          |  |
| V3SVHSHC_8212604  | AKR1E2       | 3.284E-03 |           |           |           |  |  |          |          |  |
| V3SVHSHC_9164456  | MRPL53       | 3.320E-03 |           |           |           |  |  |          |          |  |
| V3SVHSHC_5591777  | DUSP21       | 3.508E-03 |           |           |           |  |  |          |          |  |
| V3SVHSHC_6563990  | SERPINA6     | 3.554E-03 |           | 2.380E-13 | 5.139E-06 |  |  | SERPINA6 | SERPINA6 |  |
| V3SVHSHC_10475018 | EEF1G        | 3.682E-03 |           |           |           |  |  |          |          |  |
| V3SVHSHC_10551710 | SLC30A1      | 3.718E-03 |           |           |           |  |  |          |          |  |
| V3SVHSHC_6352064  | ULBP3        | 3.776E-03 |           |           |           |  |  |          |          |  |
| V3SVHSHC_6148652  | GPR20        | 3.883E-03 |           |           |           |  |  |          |          |  |
| V3SVHSHC_7675133  | TUBG2        | 3.887E-03 |           |           |           |  |  |          |          |  |
| V3SVHSHC_5824196  | PCBP4        | 3.933E-03 |           |           |           |  |  |          |          |  |
| V3SVHSHC_7597946  | NXF5         | 4.090E-03 |           |           |           |  |  |          |          |  |
| V3SVHSHC_6954644  | PHLPP1       | 4.176E-03 |           |           |           |  |  |          |          |  |
| V3SVHSHC_5485847  | REL          | 4.315E-03 |           |           |           |  |  |          |          |  |
| V3SVHSHC_6832874  | OR4S2        | 4.448E-03 |           |           |           |  |  |          |          |  |
| V3SVHSHC_10249628 | KCNJ9        | 4.679E-03 |           |           |           |  |  |          |          |  |
| V3SVHSHC_7120700  | PRG2         | 4.832E-03 | 4.481E-01 |           |           |  |  |          |          |  |
| V3SVHSHC_6367607  | SNX22        | 5.046E-03 |           |           |           |  |  |          |          |  |
| V3SVHSHC_4889537  | NCOA5        | 5.121E-03 |           |           |           |  |  |          |          |  |
| V3SVHSHC_7699685  | NCAM1        | 5.270E-03 |           |           |           |  |  |          |          |  |
| V3SVHSHC_8699552  | SST          | 5.354E-03 |           |           | 3.068E-18 |  |  |          | SST      |  |
| V3SVHSHC_6929036  | Phax         | 5.633E-03 |           |           |           |  |  |          |          |  |
| V3SVHSHC_6291674  | MPP6         | 5.726E-03 |           |           |           |  |  |          |          |  |
| V3SVHSHC_10716446 | RNASE12      | 5.952E-03 |           |           |           |  |  |          |          |  |
| V3SVHSHC_5693582  | ZNF132       | 6.224E-03 |           |           |           |  |  |          |          |  |
| V3SVHSHC_7764794  | GUCY1A3      | 6.256E-03 |           |           |           |  |  |          |          |  |
| V3SVHSHC_7567751  | ZNF709       | 6.488E-03 |           |           |           |  |  |          |          |  |
| V3SVHSHC_10767068 | PIBF1        | 6.746E-03 |           |           |           |  |  |          |          |  |
| V3SVHSHC_6167594  | WDR83        | 6.762E-03 |           |           |           |  |  |          |          |  |
| V3SVHSHC_10353908 | THAP10       | 6.932E-03 |           |           |           |  |  |          |          |  |
| V3SVHSHC_8749943  | IRGC         | 7.117E-03 |           |           |           |  |  |          |          |  |
| V3SVHSHC_6458489  | FAM153A      | 7.164E-03 |           |           |           |  |  |          |          |  |
| V3SVHSHC_7373645  | VAMP4        | 7.171E-03 |           |           |           |  |  |          |          |  |
| V3SVHSHC_4813901  | PDGFD        | 7.461E-03 |           |           |           |  |  |          |          |  |
| V3SVHSHC_4819082  | NPR1         | 7.646E-03 |           |           |           |  |  |          |          |  |
| V3SVHSHC_5252669  | LOC100130357 | 7.884E-03 |           |           |           |  |  |          |          |  |
| V3SVHSHC_10325594 | C9ORF40      | 7.964E-03 |           |           |           |  |  |          |          |  |
| V3SVHSHC_8589860  | CDX1         | 8.150E-03 |           |           |           |  |  |          |          |  |
| V3SVHSHC_6307811  | Vsig10       | 8.171E-03 |           |           |           |  |  |          |          |  |

|                   |           |           |           |           |           |  |  |  |         |      |
|-------------------|-----------|-----------|-----------|-----------|-----------|--|--|--|---------|------|
| V3SVHSHC_9247418  | OR4Q3     | 8.231E-03 |           |           |           |  |  |  |         |      |
| V3SVHSHC_6872078  | TFF3      | 8.659E-03 |           |           |           |  |  |  |         |      |
| V3SVHSHC_4847330  | RCC1      | 8.670E-03 | 7.947E-02 |           |           |  |  |  |         |      |
| V3SVHSHC_5435720  | PRKAG3    | 8.864E-03 |           |           |           |  |  |  |         |      |
| V3SVHSHC_4992530  | CSMD3     | 9.357E-03 |           |           |           |  |  |  |         |      |
| V3SVHSHC_9685262  | SCUBE1    | 9.664E-03 |           |           |           |  |  |  |         |      |
| V3SVHSHC_4748759  | THSD7B    | 9.966E-03 |           | 2.889E-22 |           |  |  |  | THSD7B  |      |
| V3SVHSHC_10679783 | SMR3B     | 1.006E-02 |           |           |           |  |  |  |         |      |
| V3SVHSHC_10416245 | ATF1      | 1.012E-02 |           |           |           |  |  |  |         |      |
| V3SVHSHC_6872837  | FCGR1B    | 1.019E-02 |           |           |           |  |  |  |         |      |
| V3SVHSHC_8614082  | TBPL1     | 1.027E-02 |           |           |           |  |  |  |         |      |
| V3SVHSHC_5442716  | ZNF473    | 1.035E-02 |           |           |           |  |  |  |         |      |
| V3SVHSHC_8656586  | SUV39H1   | 1.090E-02 |           |           |           |  |  |  |         |      |
| V3SVHSHC_10751855 | PRTN3     | 1.092E-02 |           |           |           |  |  |  |         |      |
| V3SVHSHC_8767070  | OR52N4    | 1.094E-02 |           |           |           |  |  |  |         |      |
| V3SVHSHC_7803305  | C1QTNF9   | 1.100E-02 |           |           |           |  |  |  |         |      |
| V3SVHSHC_9359057  | ZXDA      | 1.139E-02 |           |           |           |  |  |  |         |      |
| V3SVHSHC_8871350  | UTRN      | 1.141E-02 |           |           | 2.608E-04 |  |  |  |         | UTRN |
| V3SVHSHC_8055458  | VPS36     | 1.173E-02 |           |           |           |  |  |  |         |      |
| V3SVHSHC_7350314  | FGFR1     | 1.189E-02 |           |           |           |  |  |  |         |      |
| V3SVHSHC_8777267  | TMEM132B  | 1.315E-02 |           |           |           |  |  |  |         |      |
| V3SVHSHC_6965831  | ETNK1     | 1.326E-02 |           |           |           |  |  |  |         |      |
| V3SVHSHC_7409747  | ODF1      | 1.344E-02 |           |           |           |  |  |  |         |      |
| V3SVHSHC_7370939  | C1orf54   | 1.361E-02 |           |           |           |  |  |  |         |      |
| V3SVHSHC_5026223  | ZBTB14    | 1.407E-02 |           |           |           |  |  |  |         |      |
| V3SVHSHC_6156473  | ZNF711    | 1.410E-02 |           |           |           |  |  |  |         |      |
| V3SVHSHC_9796802  | FGFR1     | 1.477E-02 |           |           |           |  |  |  |         |      |
| V3SVHSHC_7389749  | OR6C75    | 1.504E-02 |           |           |           |  |  |  |         |      |
| V3SVHSHC_9443372  | MYSM1     | 1.506E-02 |           |           |           |  |  |  |         |      |
| V3SVHSHC_7607879  | YTHDF2    | 1.508E-02 |           |           |           |  |  |  |         |      |
| V3SVHSHC_6214652  | C10orf54  | 1.532E-02 |           |           |           |  |  |  |         |      |
| V3SVHSHC_6585143  | LAMP5     | 1.538E-02 |           | 7.521E-36 |           |  |  |  | LAMP5   |      |
| V3SVHSHC_7460501  | NOS2      | 1.541E-02 |           |           |           |  |  |  |         |      |
| V3SVHSHC_7558973  | GRIN3A    | 1.574E-02 |           |           |           |  |  |  |         |      |
| V3SVHSHC_5696222  | ZNF398    | 1.592E-02 |           |           |           |  |  |  |         |      |
| V3SVHSHC_9532769  | TMEM182   | 1.606E-02 |           |           |           |  |  |  |         |      |
| V3SVHSHC_7036979  | PMCH      | 1.634E-02 |           |           |           |  |  |  |         |      |
| V3SVHSHC_8130302  | CT45A6    | 1.689E-02 |           |           |           |  |  |  |         |      |
| V3SVHSHC_5210231  | PTCHD3    | 1.692E-02 |           |           |           |  |  |  |         |      |
| V3SVHSHC_10572599 | FAM195A   | 1.708E-02 |           |           |           |  |  |  |         |      |
| V3SVHSHC_8600585  | TMPRSS6   | 1.785E-02 | 4.777E-17 |           |           |  |  |  | TMPRSS6 |      |
| V3SVHSHC_4967747  | PLXNA4    | 1.816E-02 |           |           |           |  |  |  |         |      |
| V3SVHSHC_8408162  | TMEM101   | 1.820E-02 |           |           |           |  |  |  |         |      |
| V3SVHSHC_6372260  | FBXW4     | 1.855E-02 |           |           |           |  |  |  |         |      |
| V3SVHSHC_9189305  | C20orf202 | 1.855E-02 |           |           |           |  |  |  |         |      |
| V3SVHSHC_6708101  | PROSER2   | 1.858E-02 |           |           |           |  |  |  |         |      |
| V3SVHSHC_6894188  | HSPA12B   | 1.895E-02 |           |           |           |  |  |  |         |      |
| V3SVHSHC_9832904  | C1QB      | 1.933E-02 |           |           |           |  |  |  |         |      |
| V3SVHSHC_5325830  | SERPINB1  | 1.993E-02 |           |           |           |  |  |  |         |      |
| V3SVHSHC_5662991  | ZFP82     | 2.010E-02 |           |           |           |  |  |  |         |      |
| V3SVHSHC_5792417  | ABR       | 2.029E-02 |           |           |           |  |  |  |         |      |
| V3SVHSHC_6867359  | GSTA2     | 2.174E-02 |           |           |           |  |  |  |         |      |
| V3SVHSHC_5882672  | SLC23A2   | 2.244E-02 |           |           |           |  |  |  |         |      |
| V3SVHSHC_6521453  | SDAD1     | 2.279E-02 |           |           |           |  |  |  |         |      |
| V3SVHSHC_7372754  | CCDC37    | 2.313E-02 |           |           |           |  |  |  |         |      |

|                   |          |           |           |           |           |  |  |         |      |
|-------------------|----------|-----------|-----------|-----------|-----------|--|--|---------|------|
| V3SVHSHC_4824461  | MARVELD2 | 2.383E-02 |           |           |           |  |  |         |      |
| V3SVHSHC_6895739  | RNASE7   | 2.419E-02 |           |           |           |  |  |         |      |
| V3SVHSHC_6869108  | C16orf47 | 2.514E-02 |           |           |           |  |  |         |      |
| V3SVHSHC_10087697 | DDX46    | 2.530E-02 |           |           |           |  |  |         |      |
| V3SVHSHC_5460107  | RESP18   | 2.608E-02 |           |           |           |  |  |         |      |
| V3SVHSHC_7355231  | CPB1     | 2.631E-02 |           |           |           |  |  |         |      |
| V3SVHSHC_10829405 | FAM43B   | 2.758E-02 |           |           |           |  |  |         |      |
| V3SVHSHC_8508746  | OR14J1   | 2.769E-02 |           |           |           |  |  |         |      |
| V3SVHSHC_9010874  | FEZ2     | 2.892E-02 |           |           |           |  |  |         |      |
| V3SVHSHC_10038164 | DCDC2    | 2.903E-02 |           |           |           |  |  |         |      |
| V3SVHSHC_8032985  | OCIAD1   | 3.043E-02 |           |           |           |  |  |         |      |
| V3SVHSHC_7512245  | SPRYD4   | 3.117E-02 |           |           |           |  |  |         |      |
| V3SVHSHC_6417371  | INSM2    | 3.157E-02 |           |           |           |  |  |         |      |
| V3SVHSHC_7600355  | ARHGAP15 | 3.159E-02 |           |           |           |  |  |         |      |
| V3SVHSHC_4952798  | OR5P2    | 3.281E-02 |           |           |           |  |  |         |      |
| V3SVHSHC_9498317  | TG       | 3.523E-02 |           |           |           |  |  |         |      |
| V3SVHSHC_10025756 | ZSWIM7   | 3.695E-02 |           |           |           |  |  |         |      |
| V3SVHSHC_9978368  | SLC25A25 | 3.747E-02 |           |           |           |  |  |         |      |
| V3SVHSHC_6368267  | SLC35G1  | 3.867E-02 |           |           |           |  |  |         |      |
| V3SVHSHC_9319589  | XAGE1B   | 4.139E-02 |           |           |           |  |  |         |      |
| V3SVHSHC_7728494  | ACOXL    | 4.177E-02 |           |           |           |  |  |         |      |
| V3SVHSHC_8872967  | NCOA3    | 4.180E-02 |           |           |           |  |  |         |      |
| V3SVHSHC_5028995  | LAMP5    | 4.238E-02 |           |           |           |  |  |         |      |
| V3SVHSHC_8194685  | MCC      | 4.460E-02 |           |           |           |  |  |         |      |
| V3SVHSHC_8555705  | PSG11    | 4.598E-02 |           |           |           |  |  |         |      |
| V3SVHSHC_6056054  | TMEM216  | 4.683E-02 | 4.302E-04 |           |           |  |  | TMEM216 |      |
| V3SVHSHC_5696783  | ZC3H3    | 4.786E-02 |           |           |           |  |  |         |      |
| V3SVHSHC_4939301  | ZIC5     | 4.802E-02 |           |           |           |  |  |         |      |
| V3SVHSHC_9982130  | PIBF1    | 4.809E-02 |           |           |           |  |  |         |      |
| V3SVHSHC_4773245  | CFB      | 5.269E-02 |           |           |           |  |  |         |      |
| V3SVHSHC_6902174  | PF4V1    | 5.297E-02 |           |           |           |  |  |         |      |
| V3SVHSHC_5141459  | NUAK1    | 5.323E-02 |           |           |           |  |  |         |      |
| V3SVHSHC_9635762  | VMO1     | 5.379E-02 |           |           |           |  |  |         |      |
| V3SVHSHC_10022489 | TMEM218  | 5.453E-02 |           |           |           |  |  |         |      |
| V3SVHSHC_5517131  | SYCE3    | 5.466E-02 |           |           |           |  |  |         |      |
| V3SVHSHC_4912439  | DMC1     | 5.530E-02 |           |           |           |  |  |         |      |
| V3SVHSHC_5614316  | TSHZ2    | 5.591E-02 |           |           |           |  |  |         |      |
| V3SVHSHC_5071763  | PPM1D    | 5.592E-02 |           |           |           |  |  |         |      |
| V3SVHSHC_4793738  | TRIM54   | 5.610E-02 | 3.535E-14 |           |           |  |  | TRIM54  |      |
| V3SVHSHC_8022953  | MFAP3L   | 5.737E-02 |           |           |           |  |  |         |      |
| V3SVHSHC_5544356  | TMEM81   | 5.826E-02 |           |           |           |  |  |         |      |
| V3SVHSHC_10247417 | ZNF561   | 5.885E-02 |           |           |           |  |  |         |      |
| V3SVHSHC_10676813 | NSUN6    | 5.927E-02 |           |           |           |  |  |         |      |
| V3SVHSHC_5526404  | STK3     | 6.069E-02 |           |           |           |  |  |         |      |
| V3SVHSHC_6583196  | RBM44    | 6.268E-02 |           |           |           |  |  |         |      |
| V3SVHSHC_9575999  | USP6     | 6.508E-02 |           |           | 2.938E-08 |  |  |         | USP6 |
| V3SVHSHC_7877489  | CLCN1    | 6.617E-02 |           |           |           |  |  |         |      |
| V3SVHSHC_9865211  | SLC6A18  | 6.623E-02 | 4.547E-01 |           | 3.909E-01 |  |  |         |      |
| V3SVHSHC_5386814  | TOMM70A  | 6.761E-02 |           |           |           |  |  |         |      |
| V3SVHSHC_6777599  | HIST1H4F | 7.016E-02 |           |           |           |  |  |         |      |
| V3SVHSHC_9445418  | C11orf94 | 7.018E-02 |           |           | 3.567E-01 |  |  |         |      |
| V3SVHSHC_9257582  | ADCY3    | 7.197E-02 |           |           |           |  |  |         |      |
| V3SVHSHC_7525577  | NDUFA12  | 7.281E-02 |           |           |           |  |  |         |      |
| V3SVHSHC_5302202  | SIT1     | 7.336E-02 |           | 4.957E-23 |           |  |  | SIT1    |      |
| V3SVHSHC_10127792 | CLEC2L   | 7.376E-02 |           |           |           |  |  |         |      |

|                   |          |           |           |           |           |  |  |  |         |       |
|-------------------|----------|-----------|-----------|-----------|-----------|--|--|--|---------|-------|
| V3SVHSHC_6740936  | CD33     | 7.816E-02 |           |           |           |  |  |  |         |       |
| V3SVHSHC_8082419  | ALPK3    | 7.834E-02 |           |           |           |  |  |  |         |       |
| V3SVHSHC_9639557  | FOLR1    | 7.854E-02 |           |           |           |  |  |  |         |       |
| V3SVHSHC_10567352 | AIG1     | 8.093E-02 |           | 3.781E-24 |           |  |  |  | AIG1    |       |
| V3SVHSHC_8940287  | PPIAL4C  | 8.096E-02 |           |           |           |  |  |  |         |       |
| V3SVHSHC_7578146  | DNAH7    | 8.218E-02 |           |           |           |  |  |  |         |       |
| V3SVHSHC_10394366 | ANP32A   | 8.425E-02 |           |           |           |  |  |  |         |       |
| V3SVHSHC_9522440  | PSEN2    | 8.464E-02 |           |           |           |  |  |  |         |       |
| V3SVHSHC_6387605  | PPAN     | 8.688E-02 |           | 1.637E-01 |           |  |  |  |         |       |
| V3SVHSHC_10207190 | HSPB2    | 8.726E-02 |           |           |           |  |  |  |         |       |
| V3SVHSHC_4685894  | OSGIN2   | 9.232E-02 |           | 7.185E-03 |           |  |  |  |         |       |
| V3SVHSHC_8060177  | VPS16    | 9.360E-02 |           |           |           |  |  |  |         |       |
| V3SVHSHC_9314474  | FFAR1    | 9.381E-02 |           |           |           |  |  |  |         |       |
| V3SVHSHC_8961803  | CCDC59   | 9.447E-02 |           |           |           |  |  |  |         |       |
| V3SVHSHC_7012922  | CTNNA1   | 9.522E-02 |           |           |           |  |  |  |         |       |
| V3SVHSHC_9900554  | DNAJB13  | 9.570E-02 |           |           |           |  |  |  |         |       |
| V3SVHSHC_4762718  | MTX2     | 9.695E-02 |           |           |           |  |  |  |         |       |
| V3SVHSHC_8072915  | FOXRED2  | 9.759E-02 |           |           |           |  |  |  |         |       |
| V3SVHSHC_4935506  | KHDRBS2  | 9.812E-02 |           |           |           |  |  |  |         |       |
| V3SVHSHC_9317576  | ABHD17C  | 9.916E-02 |           |           |           |  |  |  |         |       |
| V3SVHSHC_6145451  | B9D2     | 9.951E-02 |           |           |           |  |  |  |         |       |
| V3SVHSHC_4732127  | CDK1     | 1.032E-01 |           |           |           |  |  |  |         |       |
| V3SVHSHC_5440934  | SCEL     | 1.033E-01 |           |           |           |  |  |  |         |       |
| V3SVHSHC_6050312  | DYNC1H1  | 1.036E-01 |           | 1.465E-01 | 2.915E-01 |  |  |  |         |       |
| V3SVHSHC_7246463  | Gramd1b  | 1.043E-01 |           |           |           |  |  |  |         |       |
| V3SVHSHC_8186402  | CEP250   | 1.049E-01 |           |           |           |  |  |  |         |       |
| V3SVHSHC_7931972  | FAM65B   | 1.052E-01 |           |           |           |  |  |  |         |       |
| V3SVHSHC_4841555  | TRAF1    | 1.056E-01 |           |           |           |  |  |  |         |       |
| V3SVHSHC_7144130  | ART5     | 1.082E-01 |           |           |           |  |  |  |         |       |
| V3SVHSHC_10117232 | RBM47    | 1.110E-01 |           |           |           |  |  |  |         |       |
| V3SVHSHC_7401926  | SEC24B   | 1.116E-01 |           |           |           |  |  |  |         |       |
| V3SVHSHC_5154857  | DHX57    | 1.140E-01 |           |           |           |  |  |  |         |       |
| V3SVHSHC_9644342  | GAGE7    | 1.150E-01 |           | 9.931E-07 |           |  |  |  | GAGE7   |       |
| V3SVHSHC_9132776  | APOL5    | 1.171E-01 |           |           |           |  |  |  |         |       |
| V3SVHSHC_5862443  | CARD14   | 1.218E-01 |           |           |           |  |  |  |         |       |
| V3SVHSHC_9333482  | CDK1     | 1.228E-01 |           |           |           |  |  |  |         |       |
| V3SVHSHC_8570984  | IL18     | 1.238E-01 |           |           |           |  |  |  |         |       |
| V3SVHSHC_10140563 | NUP62CL  | 1.283E-01 | 2.673E-13 |           | 4.734E-01 |  |  |  | NUP62CL |       |
| V3SVHSHC_8670248  | YAP1     | 1.308E-01 |           | 2.086E-01 |           |  |  |  |         |       |
| V3SVHSHC_7713380  | PPP2R1A  | 1.309E-01 |           |           |           |  |  |  |         |       |
| V3SVHSHC_9360311  | OR2L3    | 1.339E-01 |           |           |           |  |  |  |         |       |
| V3SVHSHC_6685859  | GNAT1    | 1.342E-01 |           |           |           |  |  |  |         |       |
| V3SVHSHC_5739584  | Ntn5     | 1.345E-01 |           |           |           |  |  |  |         |       |
| V3SVHSHC_5445158  | OLAH     | 1.363E-01 |           |           |           |  |  |  |         |       |
| V3SVHSHC_8819408  | CAPNS1   | 1.373E-01 |           |           |           |  |  |  |         |       |
| V3SVHSHC_8034701  | SPRR2G   | 1.381E-01 |           |           |           |  |  |  |         |       |
| V3SVHSHC_8526533  | AUNIP    | 1.386E-01 |           |           |           |  |  |  |         |       |
| V3SVHSHC_8143205  | SMS      | 1.399E-01 |           |           |           |  |  |  |         |       |
| V3SVHSHC_7849901  | ICA1L    | 1.435E-01 |           |           |           |  |  |  |         |       |
| V3SVHSHC_7080704  | C2orf44  | 1.488E-01 |           |           |           |  |  |  |         |       |
| V3SVHSHC_6770570  | ZBTB20   | 1.508E-01 |           |           |           |  |  |  |         |       |
| V3SVHSHC_5388464  | TNFRSF17 | 1.560E-01 |           |           |           |  |  |  |         |       |
| V3SVHSHC_7750703  | ACTB     | 1.598E-01 |           |           | 4.459E-01 |  |  |  |         |       |
| V3SVHSHC_8670875  | PSMD6    | 1.599E-01 |           |           |           |  |  |  |         |       |
| V3SVHSHC_4803572  | GPR65    | 1.606E-01 |           |           | 7.456E-06 |  |  |  |         | GPR65 |



|                   |              |           |           |           |           |           |  |        |          |        |
|-------------------|--------------|-----------|-----------|-----------|-----------|-----------|--|--------|----------|--------|
| V3SVHSHC_5615075  | ZNF703       | 1.635E-01 |           |           |           |           |  |        |          |        |
| V3SVHSHC_7182113  | NLRP9        | 1.635E-01 |           |           |           |           |  |        |          |        |
| V3SVHSHC_9483038  | Sycp2l       | 1.671E-01 |           |           |           |           |  |        |          |        |
| V3SVHSHC_7530527  | GRXCR2       | 1.679E-01 |           |           |           |           |  |        |          |        |
| V3SVHSHC_7395788  | IFNL3        | 1.727E-01 |           |           |           |           |  |        |          |        |
| V3SVHSHC_5404634  | TOMM34       | 1.743E-01 |           |           |           |           |  |        |          |        |
| V3SVHSHC_8327609  | MFSD6        | 1.748E-01 |           |           |           |           |  |        |          |        |
| V3SVHSHC_5946725  | COPB2        | 1.752E-01 |           |           |           |           |  |        |          |        |
| V3SVHSHC_9873758  | FUT5         | 1.770E-01 |           |           |           |           |  |        |          |        |
| V3SVHSHC_6482579  | SCRIB        | 1.788E-01 |           |           |           |           |  |        |          |        |
| V3SVHSHC_8044436  | KIT          | 1.811E-01 |           |           |           |           |  |        |          |        |
| V3SVHSHC_9543758  | KLRF1        | 1.835E-01 |           | 1.919E-54 |           |           |  |        | KLRF1    |        |
| V3SVHSHC_6750341  | KCNB1        | 1.844E-01 |           |           |           |           |  |        |          |        |
| V3SVHSHC_10322690 | APOB         | 1.845E-01 |           |           |           |           |  |        |          |        |
| V3SVHSHC_6771989  | PFDN5        | 1.865E-01 |           |           |           |           |  |        |          |        |
| V3SVHSHC_6422123  | C12orf60     | 1.916E-01 |           |           |           |           |  |        |          |        |
| V3SVHSHC_8213495  | TMEM192      | 1.919E-01 |           |           |           |           |  |        |          |        |
| V3SVHSHC_9824522  | NUDT5        | 2.019E-01 |           |           |           |           |  |        |          |        |
| V3SVHSHC_6772286  | LAMB1        | 2.046E-01 |           |           |           |           |  |        |          |        |
| V3SVHSHC_8541020  | CHST14       | 2.172E-01 |           |           |           |           |  |        |          |        |
| V3SVHSHC_9745487  | CYP24A1      | 2.181E-01 |           |           |           |           |  |        |          |        |
| V3SVHSHC_8113538  | CASC1        | 2.192E-01 |           |           |           |           |  |        |          |        |
| V3SVHSHC_8811422  | LOC101929849 | 2.210E-01 |           |           |           |           |  |        |          |        |
| V3SVHSHC_9088853  | DIRAS2       | 2.249E-01 |           |           |           | 1.254E-33 |  |        |          | DIRAS2 |
| V3SVHSHC_5624777  | POLR1A       | 2.307E-01 | 4.617E-01 |           |           | 2.303E-01 |  |        |          |        |
| V3SVHSHC_7414004  | TGFBR3L      | 2.322E-01 |           |           |           |           |  |        |          |        |
| V3SVHSHC_9315662  | SRMS         | 2.386E-01 |           |           |           |           |  |        |          |        |
| V3SVHSHC_7542143  | BLOC1S1      | 2.462E-01 |           |           |           |           |  |        |          |        |
| V3SVHSHC_7343912  | AURKA        | 2.488E-01 |           |           |           |           |  |        |          |        |
| V3SVHSHC_8777564  | HPS4         | 2.499E-01 |           |           |           |           |  |        |          |        |
| V3SVHSHC_10021103 | EPHX1        | 2.499E-01 |           |           |           |           |  |        |          |        |
| V3SVHSHC_5751662  | EPN2         | 2.581E-01 |           |           |           |           |  |        |          |        |
| V3SVHSHC_7233098  | DGCR2        | 2.595E-01 |           |           |           |           |  |        |          |        |
| V3SVHSHC_9143534  | GPATCH8      | 2.604E-01 |           |           |           | 3.886E-01 |  |        |          |        |
| V3SVHSHC_4833734  | HSD17B11     | 2.662E-01 |           |           |           |           |  |        |          |        |
| V3SVHSHC_7873298  | PIIB         | 2.695E-01 |           |           |           | 2.377E-01 |  |        |          |        |
| V3SVHSHC_8632661  | C19orf80     | 2.733E-01 |           |           |           |           |  |        |          |        |
| V3SVHSHC_7594646  | ACTB         | 2.757E-01 |           |           |           |           |  |        |          |        |
| V3SVHSHC_9694898  | RNF123       | 2.757E-01 | 8.542E-06 |           |           |           |  | RNF123 |          |        |
| V3SVHSHC_8117267  | OST4         | 2.774E-01 |           |           |           |           |  |        |          |        |
| V3SVHSHC_5416217  | CUL4A        | 2.778E-01 | 5.554E-02 | 2.288E-02 | 2.925E-15 |           |  |        |          | CUL4A  |
| V3SVHSHC_9448190  | APLF         | 2.824E-01 |           |           |           |           |  |        |          |        |
| V3SVHSHC_8265404  | PKD2L1       | 2.835E-01 |           |           |           |           |  |        |          |        |
| V3SVHSHC_5837759  | Apobr        | 2.843E-01 |           |           |           |           |  |        |          |        |
| V3SVHSHC_7795121  | SLC10A3      | 2.866E-01 |           |           |           |           |  |        |          |        |
| V3SVHSHC_5776247  | ZFAND4       | 2.873E-01 |           |           |           |           |  |        |          |        |
| V3SVHSHC_7424432  | TOMM34       | 2.891E-01 | 4.541E-01 | 1.201E-01 | 3.206E-01 |           |  |        |          |        |
| V3SVHSHC_10142180 | DAK          | 2.932E-01 |           |           |           |           |  |        |          |        |
| V3SVHSHC_9800729  | RPN2         | 2.963E-01 |           |           |           |           |  |        |          |        |
| V3SVHSHC_9853529  | SBSPON       | 2.978E-01 |           |           |           |           |  |        |          |        |
| V3SVHSHC_6304973  | C15orf56     | 3.001E-01 |           | 1.437E-06 |           |           |  |        | C15orf56 |        |
| V3SVHSHC_7690181  | PTPRT        | 3.043E-01 |           |           |           |           |  |        |          |        |
| V3SVHSHC_9811355  | ZNF396       | 3.090E-01 |           |           |           |           |  |        |          |        |
| V3SVHSHC_9962264  | TCERG1L      | 3.150E-01 |           |           |           |           |  |        |          |        |
| V3SVHSHC_8439281  | PTPRN        | 3.227E-01 |           |           |           |           |  |        |          |        |

|                   |              |           |           |           |           |  |  |  |        |          |
|-------------------|--------------|-----------|-----------|-----------|-----------|--|--|--|--------|----------|
| V3SVHSHC_7803008  | DTX3         | 3.232E-01 |           |           |           |  |  |  |        |          |
| V3SVHSHC_5529209  | H3F3B        | 3.236E-01 |           |           | 3.954E-01 |  |  |  |        |          |
| V3SVHSHC_9368330  | IL1RAPL2     | 3.240E-01 |           |           |           |  |  |  |        |          |
| V3SVHSHC_10068854 | NOTUM        | 3.351E-01 |           |           |           |  |  |  |        |          |
| V3SVHSHC_6790139  | ACACB        | 3.352E-01 |           |           |           |  |  |  |        |          |
| V3SVHSHC_5498288  | HSF1         | 3.398E-01 |           |           |           |  |  |  |        |          |
| V3SVHSHC_10635332 | SERTAD3      | 3.432E-01 |           |           |           |  |  |  |        |          |
| V3SVHSHC_7112582  | BAG4         | 3.435E-01 |           |           |           |  |  |  |        |          |
| V3SVHSHC_8860130  | OCM          | 3.454E-01 |           |           |           |  |  |  |        |          |
| V3SVHSHC_10134722 | SLITRK6      | 3.470E-01 |           |           |           |  |  |  |        |          |
| V3SVHSHC_8219435  | NOVA2        | 3.495E-01 |           |           |           |  |  |  |        |          |
| V3SVHSHC_5975534  | DIRAS1       | 3.556E-01 |           |           |           |  |  |  |        |          |
| V3SVHSHC_5009063  | SUPT20HL2    | 3.583E-01 |           |           |           |  |  |  |        |          |
| V3SVHSHC_8622926  | C3orf67      | 3.589E-01 | 2.892E-01 |           |           |  |  |  |        |          |
| V3SVHSHC_7203959  | LOC101929051 | 3.652E-01 |           |           |           |  |  |  |        |          |
| V3SVHSHC_7420076  | TMEM55A      | 3.685E-01 |           |           |           |  |  |  |        |          |
| V3SVHSHC_6190958  | SNX31        | 3.693E-01 |           |           |           |  |  |  |        |          |
| V3SVHSHC_9617843  | PRKCG        | 3.697E-01 |           |           |           |  |  |  |        |          |
| V3SVHSHC_6443276  | GPBP1L1      | 3.725E-01 |           |           |           |  |  |  |        |          |
| V3SVHSHC_7534190  | PLK1         | 3.735E-01 |           |           |           |  |  |  |        |          |
| V3SVHSHC_8815778  | SLC29A2      | 3.855E-01 |           |           |           |  |  |  |        |          |
| V3SVHSHC_7874453  | TTLL12       | 3.892E-01 |           |           |           |  |  |  |        |          |
| V3SVHSHC_6601973  | LOC101060301 | 3.897E-01 |           |           |           |  |  |  |        |          |
| V3SVHSHC_4868846  | DSC1         | 3.903E-01 |           |           |           |  |  |  |        |          |
| V3SVHSHC_7902833  | NIP7         | 3.971E-01 |           |           | 2.943E-01 |  |  |  |        |          |
| V3SVHSHC_7101692  | CDC42EP3     | 4.028E-01 |           |           |           |  |  |  |        |          |
| V3SVHSHC_10143962 | WWTR1        | 4.042E-01 |           |           |           |  |  |  |        |          |
| V3SVHSHC_6437105  | SLC35E2B     | 4.090E-01 |           |           | 2.836E-08 |  |  |  |        | SLC35E2B |
| V3SVHSHC_6942368  | TMBIM6       | 4.115E-01 |           |           |           |  |  |  |        |          |
| V3SVHSHC_9362423  | UBB          | 4.126E-01 |           |           |           |  |  |  |        |          |
| V3SVHSHC_10693412 | ZNF19        | 4.143E-01 |           |           |           |  |  |  |        |          |
| V3SVHSHC_6641441  | TNFRSF17     | 4.172E-01 |           |           |           |  |  |  |        |          |
| V3SVHSHC_6887126  | ACTB         | 4.229E-01 |           |           |           |  |  |  |        |          |
| V3SVHSHC_4662893  | ACVR1C       | 4.249E-01 |           |           |           |  |  |  |        |          |
| V3SVHSHC_5138489  | SSPN         | 4.256E-01 |           |           |           |  |  |  |        |          |
| V3SVHSHC_7840199  | UTS2B        | 4.310E-01 |           |           |           |  |  |  |        |          |
| V3SVHSHC_7966325  | PDF          | 4.355E-01 |           |           |           |  |  |  |        |          |
| V3SVHSHC_7543199  | RHBDD1       | 4.356E-01 |           |           |           |  |  |  |        |          |
| V3SVHSHC_4676324  | DENR         | 4.407E-01 |           |           |           |  |  |  |        |          |
| V3SVHSHC_8953190  | ZFP28        | 4.423E-01 |           |           |           |  |  |  |        |          |
| V3SVHSHC_6356222  | HSBP1L1      | 4.438E-01 |           |           | 4.010E-01 |  |  |  |        |          |
| V3SVHSHC_7700543  | GRHL2        | 4.466E-01 |           |           |           |  |  |  |        |          |
| V3SVHSHC_6237092  | DCAF15       | 4.489E-01 |           |           |           |  |  |  |        |          |
| V3SVHSHC_10133534 | FCGRT        | 4.611E-01 |           |           |           |  |  |  |        |          |
| V3SVHSHC_5435951  | TBC1D22A     | 4.628E-01 |           |           |           |  |  |  |        |          |
| V3SVHSHC_5605439  | FGFR1        | 4.659E-01 |           | 1.133E-01 |           |  |  |  |        |          |
| V3SVHSHC_8335562  | PABPC4       | 4.705E-01 |           | 1.374E-08 |           |  |  |  | PABPC4 |          |
| V3SVHSHC_9742847  | BAI2         | 4.712E-01 |           |           | 5.282E-16 |  |  |  |        | BAI2     |
| V3SVHSHC_8058164  | TPP1         | 4.734E-01 |           |           |           |  |  |  |        |          |
| V3SVHSHC_8420999  | TRIM16L      | 4.756E-01 |           |           |           |  |  |  |        |          |
| V3SVHSHC_10092581 | FAM163A      | 4.785E-01 |           |           |           |  |  |  |        |          |
| V3SVHSHC_10202108 | PNLIPRP1     | 4.826E-01 |           | 1.599E-01 |           |  |  |  |        |          |
| V3SVHSHC_7367342  | SPTBN2       | 4.926E-01 |           |           |           |  |  |  |        |          |
| V3SVHSHC_8494358  | CALN1        | 4.969E-01 |           |           |           |  |  |  |        |          |
| V3SVHSHC_8746676  | IL18RAP      | 4.980E-01 |           |           |           |  |  |  |        |          |

|                   |               |           |           |  |           |  |  |               |           |
|-------------------|---------------|-----------|-----------|--|-----------|--|--|---------------|-----------|
| V3SVHSHC_4744931  | SAP130        | 4.994E-01 |           |  |           |  |  |               |           |
| V3SVHSHC_9258506  | CD8B          |           | 3.666E-42 |  |           |  |  | CD8B          |           |
| V3SVHSHC_5619629  | SET           |           | 2.128E-36 |  |           |  |  | SET           |           |
| V3SVHSHC_7442285  | COX6B1        |           | 5.857E-36 |  |           |  |  | COX6B1        |           |
| V3SVHSHC_9148418  | GABARAPL1     |           | 6.733E-36 |  |           |  |  | GABARAPL1     |           |
| V3SVHSHC_10183727 | TJP2          |           | 5.144E-35 |  |           |  |  | TJP2          |           |
| V3SVHSHC_6484658  | TMEM170A      |           | 2.310E-33 |  |           |  |  | TMEM170A      |           |
| V3SVHSHC_8377835  | C1QL4         |           | 6.105E-32 |  |           |  |  | C1QL4         |           |
| V3SVHSHC_7726448  | HIST1H1T      |           | 1.866E-29 |  |           |  |  | HIST1H1T      |           |
| V3SVHSHC_10345163 | SMIM23        |           | 3.728E-29 |  |           |  |  | SMIM23        |           |
| V3SVHSHC_8197952  | Chpf2         |           | 2.674E-27 |  |           |  |  | Chpf2         |           |
| V3SVHSHC_5177825  | PRODH         |           | 3.686E-27 |  |           |  |  | PRODH         |           |
| V3SVHSHC_6457796  | GALNT8        |           | 1.427E-26 |  |           |  |  | GALNT8        |           |
| V3SVHSHC_7710938  | GOLPH3        |           | 2.424E-26 |  |           |  |  | GOLPH3        |           |
| V3SVHSHC_10142213 | FAM69C        |           | 7.109E-26 |  |           |  |  | FAM69C        |           |
| V3SVHSHC_5006291  | SIRT5         |           | 8.241E-26 |  |           |  |  | SIRT5         |           |
| V3SVHSHC_10712684 | ATXN2L        |           | 1.102E-25 |  |           |  |  | ATXN2L        |           |
| V3SVHSHC_10310810 | CLUL1         |           | 1.472E-25 |  |           |  |  | CLUL1         |           |
| V3SVHSHC_8798552  | IFNL3         |           | 3.392E-25 |  |           |  |  | IFNL3         |           |
| V3SVHSHC_6929927  | PTRH2         |           | 8.596E-25 |  |           |  |  | PTRH2         |           |
| V3SVHSHC_10543955 | JADE3 (PHF16) |           | 8.771E-25 |  |           |  |  | JADE3 (PHF16) |           |
| V3SVHSHC_7754696  | SIGLEC8       |           | 1.217E-24 |  |           |  |  | SIGLEC8       |           |
| V3SVHSHC_5588708  | ABCA13        |           | 1.415E-24 |  |           |  |  | ABCA13        |           |
| V3SVHSHC_7615469  | SNAP25        |           | 3.678E-24 |  |           |  |  | SNAP25        |           |
| V3SVHSHC_9120962  | TMPRSS11F     |           | 4.086E-24 |  | 7.203E-16 |  |  | TMPRSS11F     | TMPRSS11F |
| V3SVHSHC_4655072  | GRPEL2        |           | 1.945E-23 |  |           |  |  | GRPEL2        |           |
| V3SVHSHC_10419809 | EGFR          |           | 3.271E-23 |  |           |  |  | EGFR          |           |
| V3SVHSHC_9749810  | GM2A          |           | 4.526E-23 |  |           |  |  | GM2A          |           |
| V3SVHSHC_10825412 | ANGPTL4       |           | 4.907E-23 |  |           |  |  | ANGPTL4       |           |
| V3SVHSHC_5900228  | PNPLA5        |           | 8.111E-23 |  |           |  |  | PNPLA5        |           |
| V3SVHSHC_10297181 | Greb1l        |           | 1.894E-22 |  |           |  |  | Greb1l        |           |
| V3SVHSHC_5757800  | PKHD1         |           | 2.060E-22 |  |           |  |  | PKHD1         |           |
| V3SVHSHC_5136311  | TAF1L         |           | 3.053E-22 |  |           |  |  | TAF1L         |           |
| V3SVHSHC_7378034  | ISX           |           | 3.999E-22 |  |           |  |  | ISX           |           |
| V3SVHSHC_6924218  | GSTM3         |           | 7.221E-22 |  |           |  |  | GSTM3         |           |
| V3SVHSHC_6785552  | RNF26         |           | 3.363E-21 |  |           |  |  | RNF26         |           |
| V3SVHSHC_7754663  | FAM127A       |           | 4.270E-21 |  |           |  |  | FAM127A       |           |
| V3SVHSHC_8921411  | OGG1          |           | 4.899E-21 |  |           |  |  | OGG1          |           |
| V3SVHSHC_8211416  | PLIN1         |           | 5.020E-21 |  |           |  |  | PLIN1         |           |
| V3SVHSHC_5786444  | LDB1          |           | 6.608E-21 |  |           |  |  | LDB1          |           |
| V3SVHSHC_8513366  | TRIM39-RPP21  |           | 7.407E-21 |  |           |  |  | TRIM39-RPP21  |           |
| V3SVHSHC_5100935  | RHPN2         |           | 7.527E-21 |  |           |  |  | RHPN2         |           |
| V3SVHSHC_9284807  | KLHL13        |           | 7.531E-21 |  |           |  |  | KLHL13        |           |
| V3SVHSHC_8837591  | OR5K4         |           | 9.238E-21 |  |           |  |  | OR5K4         |           |
| V3SVHSHC_10633286 | SUB1          |           | 2.164E-20 |  |           |  |  | SUB1          |           |
| V3SVHSHC_8363777  | CLEC6A        |           | 2.468E-20 |  |           |  |  | CLEC6A        |           |
| V3SVHSHC_10017374 | DENND3        |           | 3.218E-20 |  |           |  |  | DENND3        |           |
| V3SVHSHC_5037344  | SC5D          |           | 3.300E-20 |  |           |  |  | SC5D          |           |
| V3SVHSHC_4808027  | SLC34A1       |           | 3.460E-20 |  |           |  |  | SLC34A1       |           |
| V3SVHSHC_9741362  | GSPT1         |           | 3.609E-20 |  | 1.394E-05 |  |  | GSPT1         | GSPT1     |

|                   |           |  |           |  |  |  |           |  |  |
|-------------------|-----------|--|-----------|--|--|--|-----------|--|--|
| V3SVHSHC_6438656  | USP20     |  | 4.665E-20 |  |  |  | USP20     |  |  |
| V3SVHSHC_10689848 | PTDSS1    |  | 9.862E-20 |  |  |  | PTDSS1    |  |  |
| V3SVHSHC_5433641  | TAF9B     |  | 1.016E-19 |  |  |  | TAF9B     |  |  |
| V3SVHSHC_5101232  | ROM1      |  | 1.245E-19 |  |  |  | ROM1      |  |  |
| V3SVHSHC_7216796  | CELSR2    |  | 1.437E-19 |  |  |  | CELSR2    |  |  |
| V3SVHSHC_6392423  | AFP       |  | 1.478E-19 |  |  |  | AFP       |  |  |
| V3SVHSHC_7463075  | TGIF2LY   |  | 2.214E-19 |  |  |  | TGIF2LY   |  |  |
| V3SVHSHC_10478351 | CHIC2     |  | 2.247E-19 |  |  |  | CHIC2     |  |  |
| V3SVHSHC_9348662  | SLC12A4   |  | 2.656E-19 |  |  |  | SLC12A4   |  |  |
| V3SVHSHC_7256231  | KLF12     |  | 2.673E-19 |  |  |  | KLF12     |  |  |
| V3SVHSHC_5884784  | GABBR1    |  | 3.624E-19 |  |  |  | GABBR1    |  |  |
| V3SVHSHC_10758422 | CCDC17    |  | 3.650E-19 |  |  |  | CCDC17    |  |  |
| V3SVHSHC_4830368  | STXBP6    |  | 3.809E-19 |  |  |  | STXBP6    |  |  |
| V3SVHSHC_8541449  | IL5       |  | 3.944E-19 |  |  |  | IL5       |  |  |
| V3SVHSHC_6734831  | GNG13     |  | 4.006E-19 |  |  |  | GNG13     |  |  |
| V3SVHSHC_6870494  | VCAM1     |  | 4.905E-19 |  |  |  | VCAM1     |  |  |
| V3SVHSHC_6732653  | HTN1      |  | 5.121E-19 |  |  |  | HTN1      |  |  |
| V3SVHSHC_8599199  | HIBCH     |  | 5.223E-19 |  |  |  | HIBCH     |  |  |
| V3SVHSHC_8833664  | ATP13A4   |  | 5.601E-19 |  |  |  | ATP13A4   |  |  |
| V3SVHSHC_10203461 | C2orf61   |  | 5.635E-19 |  |  |  | C2orf61   |  |  |
| V3SVHSHC_8686220  | ELAVL4    |  | 5.883E-19 |  |  |  | ELAVL4    |  |  |
| V3SVHSHC_8270024  | SYK       |  | 5.984E-19 |  |  |  | SYK       |  |  |
| V3SVHSHC_5392787  | KRTAP4-11 |  | 7.011E-19 |  |  |  | KRTAP4-11 |  |  |
| V3SVHSHC_9947744  | MRPL48    |  | 8.339E-19 |  |  |  | MRPL48    |  |  |
| V3SVHSHC_9054467  | SHROOM3   |  | 8.365E-19 |  |  |  | SHROOM3   |  |  |
| V3SVHSHC_5602832  | Prss53    |  | 8.460E-19 |  |  |  | Prss53    |  |  |
| V3SVHSHC_8881250  | SPINK9    |  | 8.954E-19 |  |  |  | SPINK9    |  |  |
| V3SVHSHC_5435192  | FCRL4     |  | 9.171E-19 |  |  |  | FCRL4     |  |  |
| V3SVHSHC_5242868  | EBAG9     |  | 9.399E-19 |  |  |  | EBAG9     |  |  |
| V3SVHSHC_6975137  | CCND2     |  | 9.883E-19 |  |  |  | CCND2     |  |  |
| V3SVHSHC_10749974 | CEP164    |  | 1.001E-18 |  |  |  | CEP164    |  |  |
| V3SVHSHC_8985167  | CXCL6     |  | 1.038E-18 |  |  |  | CXCL6     |  |  |
| V3SVHSHC_6806771  | Sycp2l    |  | 1.073E-18 |  |  |  | Sycp2l    |  |  |
| V3SVHSHC_9449444  | C3AR1     |  | 1.225E-18 |  |  |  | C3AR1     |  |  |
| V3SVHSHC_10609526 | IGF2BP3   |  | 1.250E-18 |  |  |  | IGF2BP3   |  |  |
| V3SVHSHC_6906431  | DNAJB7    |  | 1.250E-18 |  |  |  | DNAJB7    |  |  |
| V3SVHSHC_7281047  | ULBP1     |  | 1.258E-18 |  |  |  | ULBP1     |  |  |
| V3SVHSHC_10854254 | C10orf62  |  | 1.377E-18 |  |  |  | C10orf62  |  |  |
| V3SVHSHC_5827463  | C17orf98  |  | 1.419E-18 |  |  |  | C17orf98  |  |  |
| V3SVHSHC_7595240  | BGLAP     |  | 1.493E-18 |  |  |  | BGLAP     |  |  |
| V3SVHSHC_5104400  | POM121L2  |  | 1.617E-18 |  |  |  | POM121L2  |  |  |
| V3SVHSHC_10173860 | VAMP3     |  | 1.712E-18 |  |  |  | VAMP3     |  |  |
| V3SVHSHC_10356977 | DDX47     |  | 1.714E-18 |  |  |  | DDX47     |  |  |
| V3SVHSHC_4879505  | STK17A    |  | 1.761E-18 |  |  |  | STK17A    |  |  |
| V3SVHSHC_6204554  | TEX28     |  | 2.014E-18 |  |  |  | TEX28     |  |  |
| V3SVHSHC_10608932 | WDFY1     |  | 2.029E-18 |  |  |  | WDFY1     |  |  |
| V3SVHSHC_4692560  | MRPL10    |  | 2.133E-18 |  |  |  | MRPL10    |  |  |
| V3SVHSHC_7765883  | ADAMTS19  |  | 2.348E-18 |  |  |  | ADAMTS19  |  |  |
| V3SVHSHC_8091131  | SLC39A2   |  | 2.601E-18 |  |  |  | SLC39A2   |  |  |
| V3SVHSHC_10668629 | Dnajc30   |  | 2.908E-18 |  |  |  | Dnajc30   |  |  |
| V3SVHSHC_6047540  | REEP4     |  | 3.183E-18 |  |  |  | REEP4     |  |  |
| V3SVHSHC_8583887  | OR9A4     |  | 3.499E-18 |  |  |  | OR9A4     |  |  |

|                   |                |  |           |           |  |  |                |       |  |
|-------------------|----------------|--|-----------|-----------|--|--|----------------|-------|--|
| V3SVHSHC_6895805  | UBL4B          |  | 3.860E-18 |           |  |  | UBL4B          |       |  |
| V3SVHSHC_6434003  | SHOC2          |  | 4.006E-18 |           |  |  | SHOC2          |       |  |
| V3SVHSHC_9839570  | BTNL2          |  | 5.137E-18 |           |  |  | BTNL2          |       |  |
| V3SVHSHC_7667807  | PRAME          |  | 5.195E-18 | 8.231E-19 |  |  | PRAME          | PRAME |  |
| V3SVHSHC_8542010  | GPR55          |  | 5.695E-18 |           |  |  | GPR55          |       |  |
| V3SVHSHC_5460602  | ARHGEF7        |  | 5.986E-18 |           |  |  | ARHGEF7        |       |  |
| V3SVHSHC_9593720  | KCNA6          |  | 5.990E-18 |           |  |  | KCNA6          |       |  |
| V3SVHSHC_5741564  | TNFAIP1        |  | 6.518E-18 |           |  |  | TNFAIP1        |       |  |
| V3SVHSHC_8673911  | EREG           |  | 7.222E-18 |           |  |  | EREG           |       |  |
| V3SVHSHC_4659230  | NECAB2         |  | 7.265E-18 |           |  |  | NECAB2         |       |  |
| V3SVHSHC_6965501  | CAPN6          |  | 7.784E-18 |           |  |  | CAPN6          |       |  |
| V3SVHSHC_8340347  | AJAP1          |  | 9.312E-18 |           |  |  | AJAP1          |       |  |
| V3SVHSHC_7826141  | THNSL1         |  | 9.319E-18 |           |  |  | THNSL1         |       |  |
| V3SVHSHC_8863562  | POLR2K         |  | 9.394E-18 |           |  |  | POLR2K         |       |  |
| V3SVHSHC_9816767  | UBE2D2         |  | 1.256E-17 |           |  |  | UBE2D2         |       |  |
| V3SVHSHC_10393805 | NFATC1         |  | 1.331E-17 |           |  |  | NFATC1         |       |  |
| V3SVHSHC_8275667  | SCFD2          |  | 1.406E-17 |           |  |  | SCFD2          |       |  |
| V3SVHSHC_7830827  | APOBEC3F       |  | 1.433E-17 |           |  |  | APOBEC3F       |       |  |
| V3SVHSHC_7260290  | SOC57          |  | 1.457E-17 |           |  |  | SOC57          |       |  |
| V3SVHSHC_10601012 | FEZF2          |  | 1.476E-17 |           |  |  | FEZF2          |       |  |
| V3SVHSHC_5195315  | GRB7           |  | 1.582E-17 | 5.394E-05 |  |  | GRB7           | GRB7  |  |
| V3SVHSHC_6375065  | GJA5           |  | 1.620E-17 |           |  |  | GJA5           |       |  |
| V3SVHSHC_7049453  | CTTNBP2NL      |  | 1.696E-17 |           |  |  | CTTNBP2NL      |       |  |
| V3SVHSHC_9014471  | C10ORF53       |  | 1.891E-17 |           |  |  | C10ORF53       |       |  |
| V3SVHSHC_8437004  | BLZF1          |  | 1.950E-17 |           |  |  | BLZF1          |       |  |
| V3SVHSHC_10828316 | CRY1           |  | 2.160E-17 |           |  |  | CRY1           |       |  |
| V3SVHSHC_10647872 | PLEKHF2        |  | 2.302E-17 |           |  |  | PLEKHF2        |       |  |
| V3SVHSHC_8565011  | SDPR           |  | 2.476E-17 |           |  |  | SDPR           |       |  |
| V3SVHSHC_9184487  | SUSD1          |  | 2.561E-17 |           |  |  | SUSD1          |       |  |
| V3SVHSHC_7568477  | KRTAP9-1       |  | 2.646E-17 |           |  |  | KRTAP9-1       |       |  |
| V3SVHSHC_7771922  | PTP4A2         |  | 2.679E-17 |           |  |  | PTP4A2         |       |  |
| V3SVHSHC_7262336  | AMIGO2         |  | 3.092E-17 |           |  |  | AMIGO2         |       |  |
| V3SVHSHC_5656424  | DNASE1L1       |  | 3.428E-17 |           |  |  | DNASE1L1       |       |  |
| V3SVHSHC_8980448  | RBM45          |  | 3.438E-17 |           |  |  | RBM45          |       |  |
| V3SVHSHC_8801522  | KDELC1         |  | 3.475E-17 |           |  |  | KDELC1         |       |  |
| V3SVHSHC_8934083  | PKD1           |  | 3.694E-17 |           |  |  | PKD1           |       |  |
| V3SVHSHC_10287446 | KIFAP3         |  | 3.839E-17 |           |  |  | KIFAP3         |       |  |
| V3SVHSHC_7702259  | FOX11          |  | 4.053E-17 |           |  |  | FOX11          |       |  |
| V3SVHSHC_7089581  | OR4C6          |  | 4.136E-17 |           |  |  | OR4C6          |       |  |
| V3SVHSHC_7842311  | MTMR9          |  | 4.562E-17 |           |  |  | MTMR9          |       |  |
| V3SVHSHC_6826208  | ZNF816-ZNF321P |  | 4.571E-17 |           |  |  | ZNF816-ZNF321P |       |  |
| V3SVHSHC_7111460  | LOC101059976   |  | 4.595E-17 |           |  |  | LOC101059976   |       |  |
| V3SVHSHC_6264383  | GPR20          |  | 4.914E-17 |           |  |  | GPR20          |       |  |
| V3SVHSHC_8226827  | STARD13        |  | 5.048E-17 |           |  |  | STARD13        |       |  |
| V3SVHSHC_5385098  | GPR137         |  | 5.408E-17 |           |  |  | GPR137         |       |  |
| V3SVHSHC_7189241  | TOP1           |  | 5.677E-17 |           |  |  | TOP1           |       |  |
| V3SVHSHC_7391828  | HOXD8          |  | 6.033E-17 |           |  |  | HOXD8          |       |  |
| V3SVHSHC_5341406  | ANKRD18A       |  | 6.048E-17 |           |  |  | ANKRD18A       |       |  |
| V3SVHSHC_5489873  | FAM83D         |  | 6.105E-17 |           |  |  | FAM83D         |       |  |

|                   |              |  |           |           |           |  |              |          |        |
|-------------------|--------------|--|-----------|-----------|-----------|--|--------------|----------|--------|
| V3SVHSHC_6516503  | OR6B2        |  | 6.370E-17 |           |           |  | OR6B2        |          |        |
| V3SVHSHC_7309526  | CGB1         |  | 6.534E-17 |           |           |  | CGB1         |          |        |
| V3SVHSHC_7738922  | CDH6         |  | 6.546E-17 |           |           |  | CDH6         |          |        |
| V3SVHSHC_10845707 | PCGF2        |  | 6.963E-17 |           |           |  | PCGF2        |          |        |
| V3SVHSHC_8681666  | AIM2         |  | 7.067E-17 |           |           |  | AIM2         |          |        |
| V3SVHSHC_6923261  | NUP37        |  | 7.152E-17 |           |           |  | NUP37        |          |        |
| V3SVHSHC_8511122  | SLC43A2      |  | 7.699E-17 |           |           |  | SLC43A2      |          |        |
| V3SVHSHC_9521945  | SLC2A14      |  | 8.138E-17 |           |           |  | SLC2A14      |          |        |
| V3SVHSHC_7325927  | Mst4         |  | 8.215E-17 | 5.813E-06 |           |  | Mst4         | Mst4     |        |
| V3SVHSHC_8987378  | LCMT2        |  | 8.378E-17 |           |           |  | LCMT2        |          |        |
| V3SVHSHC_10011137 | OR4E2        |  | 8.979E-17 |           |           |  | OR4E2        |          |        |
| V3SVHSHC_9934874  | CITED2       |  | 9.147E-17 |           |           |  | CITED2       |          |        |
| V3SVHSHC_10568507 | FKBP15       |  | 9.309E-17 |           | 4.428E-21 |  | FKBP15       |          | FKBP15 |
| V3SVHSHC_4772453  | MS4A12       |  | 9.384E-17 |           |           |  | MS4A12       |          |        |
| V3SVHSHC_6470567  | DEFB131      |  | 9.721E-17 |           |           |  | DEFB131      |          |        |
| V3SVHSHC_4905212  | LOC101930085 |  | 9.830E-17 |           |           |  | LOC101930085 |          |        |
| V3SVHSHC_10599494 | PDP1         |  | 9.993E-17 | 3.726E-03 |           |  | PDP1         |          |        |
| V3SVHSHC_5364473  | SIK3         |  | 1.101E-16 |           |           |  | SIK3         |          |        |
| V3SVHSHC_6226697  | SP110        |  | 1.169E-16 |           |           |  | SP110        |          |        |
| V3SVHSHC_8529866  | TMEM165      |  | 1.257E-16 | 2.931E-13 |           |  | TMEM165      | TMEM165  |        |
| V3SVHSHC_6293324  | ZNF665       |  | 1.275E-16 |           |           |  | ZNF665       |          |        |
| V3SVHSHC_10034303 | TRAM1        |  | 1.398E-16 |           |           |  | TRAM1        |          |        |
| V3SVHSHC_9449279  | LOXL1        |  | 1.451E-16 | 2.568E-10 |           |  | LOXL1        | LOXL1    |        |
| V3SVHSHC_8652956  | SLC12A7      |  | 1.494E-16 |           |           |  | SLC12A7      |          |        |
| V3SVHSHC_6095357  | TRAFD1       |  | 1.494E-16 |           |           |  | TRAFD1       |          |        |
| V3SVHSHC_6707738  | NGRN         |  | 1.504E-16 |           |           |  | NGRN         |          |        |
| V3SVHSHC_9114692  | CCNC         |  | 1.542E-16 |           |           |  | CCNC         |          |        |
| V3SVHSHC_6078494  | PRIMA1       |  | 1.578E-16 |           |           |  | PRIMA1       |          |        |
| V3SVHSHC_9627677  | SH3PXD2B     |  | 1.620E-16 |           |           |  | SH3PXD2B     |          |        |
| V3SVHSHC_7859669  | SFN          |  | 1.688E-16 |           |           |  | SFN          |          |        |
| V3SVHSHC_8440700  | ZNF500       |  | 1.880E-16 |           |           |  | ZNF500       |          |        |
| V3SVHSHC_8482841  | C9orf169     |  | 2.000E-16 | 2.881E-17 |           |  | C9orf169     | C9orf169 |        |
| V3SVHSHC_7229435  | EPT1         |  | 2.099E-16 |           |           |  | EPT1         |          |        |
| V3SVHSHC_10054202 | GLI3         |  | 2.166E-16 |           |           |  | GLI3         |          |        |
| V3SVHSHC_10661534 | FAM65A       |  | 2.242E-16 |           |           |  | FAM65A       |          |        |
| V3SVHSHC_10197224 | PKN1         |  | 2.332E-16 |           |           |  | PKN1         |          |        |
| V3SVHSHC_8451260  | GCA          |  | 2.557E-16 |           |           |  | GCA          |          |        |
| V3SVHSHC_8852705  | SIN3A        |  | 2.559E-16 |           |           |  | SIN3A        |          |        |
| V3SVHSHC_9980744  | MTBP         |  | 2.570E-16 |           |           |  | MTBP         |          |        |
| V3SVHSHC_10028693 | ASMTL        |  | 2.631E-16 |           |           |  | ASMTL        |          |        |
| V3SVHSHC_7826405  | ZNF433       |  | 2.948E-16 |           |           |  | ZNF433       |          |        |
| V3SVHSHC_6127928  | TRPT1        |  | 3.113E-16 |           |           |  | TRPT1        |          |        |
| V3SVHSHC_7245308  | COQ7         |  | 3.180E-16 |           |           |  | COQ7         |          |        |
| V3SVHSHC_6177032  | HSPB8        |  | 3.245E-16 |           |           |  | HSPB8        |          |        |
| V3SVHSHC_5608046  | Lrit1        |  | 3.264E-16 |           |           |  | Lrit1        |          |        |
| V3SVHSHC_5353055  | CRYBA4       |  | 3.325E-16 |           |           |  | CRYBA4       |          |        |
| V3SVHSHC_7399517  | C15orf57     |  | 3.367E-16 |           |           |  | C15orf57     |          |        |
| V3SVHSHC_9728690  | SMAD3        |  | 3.675E-16 |           |           |  | SMAD3        |          |        |
| V3SVHSHC_5803142  | Ly6g6f       |  | 3.868E-16 |           |           |  | Ly6g6f       |          |        |
| V3SVHSHC_6933656  | CD79B        |  | 4.078E-16 |           |           |  | CD79B        |          |        |
| V3SVHSHC_10220060 | Tbck         |  | 4.144E-16 |           |           |  | Tbck         |          |        |
| V3SVHSHC_8543891  | SYCE1L       |  | 4.259E-16 |           |           |  | SYCE1L       |          |        |
| V3SVHSHC_6732521  | NFKB2        |  | 4.561E-16 |           |           |  | NFKB2        |          |        |

|                   |              |  |           |           |           |  |              |        |  |
|-------------------|--------------|--|-----------|-----------|-----------|--|--------------|--------|--|
| V3SVHSHC_6402488  | FRMD8        |  | 4.627E-16 |           |           |  | FRMD8        |        |  |
| V3SVHSHC_6455948  | LHCGR        |  | 4.802E-16 |           |           |  | LHCGR        |        |  |
| V3SVHSHC_4931249  | AKAP3        |  | 4.944E-16 |           |           |  | AKAP3        |        |  |
| V3SVHSHC_4849013  | PTP4A1       |  | 5.151E-16 |           |           |  | PTP4A1       |        |  |
| V3SVHSHC_9942035  | SOCS1        |  | 5.228E-16 |           |           |  | SOCS1        |        |  |
| V3SVHSHC_8322362  | DHTKD1       |  | 5.819E-16 |           |           |  | DHTKD1       |        |  |
| V3SVHSHC_7642232  | LAMB4        |  | 5.842E-16 |           |           |  | LAMB4        |        |  |
| V3SVHSHC_7477100  | PAM          |  | 6.021E-16 |           |           |  | PAM          |        |  |
| V3SVHSHC_6728693  | Syce2        |  | 6.159E-16 |           |           |  | Syce2        |        |  |
| V3SVHSHC_7714568  | TMEM56       |  | 6.188E-16 |           |           |  | TMEM56       |        |  |
| V3SVHSHC_9345593  | PHF2         |  | 6.756E-16 |           |           |  | PHF2         |        |  |
| V3SVHSHC_8930948  | ST20-MTHFS   |  | 6.810E-16 |           |           |  | ST20-MTHFS   |        |  |
| V3SVHSHC_7742651  | C15orf32     |  | 7.123E-16 |           |           |  | C15orf32     |        |  |
| V3SVHSHC_6723644  | HSD17B4      |  | 7.547E-16 |           |           |  | HSD17B4      |        |  |
| V3SVHSHC_6723908  | CMTM6        |  | 7.778E-16 |           |           |  | CMTM6        |        |  |
| V3SVHSHC_4647779  | GSPT2        |  | 8.061E-16 |           | 4.201E-01 |  | GSPT2        |        |  |
| V3SVHSHC_6417140  | C6ORF89      |  | 8.419E-16 |           |           |  | C6ORF89      |        |  |
| V3SVHSHC_4936595  | PVRL2        |  | 8.546E-16 |           |           |  | PVRL2        |        |  |
| V3SVHSHC_8811092  | Tctex1d2     |  | 9.044E-16 |           |           |  | Tctex1d2     |        |  |
| V3SVHSHC_7496702  | RABGGTB      |  | 9.049E-16 |           |           |  | RABGGTB      |        |  |
| V3SVHSHC_4909436  | JPH3         |  | 9.225E-16 |           |           |  | JPH3         |        |  |
| V3SVHSHC_10245866 | CACNB3       |  | 9.307E-16 |           |           |  | CACNB3       |        |  |
| V3SVHSHC_9904547  | PALM         |  | 9.890E-16 |           |           |  | PALM         |        |  |
| V3SVHSHC_9605930  | CYP7B1       |  | 1.017E-15 |           |           |  | CYP7B1       |        |  |
| V3SVHSHC_10783700 | DHX40        |  | 1.023E-15 |           |           |  | DHX40        |        |  |
| V3SVHSHC_5624909  | KCTD10       |  | 1.070E-15 |           |           |  | KCTD10       |        |  |
| V3SVHSHC_7543067  | VIPR2        |  | 1.089E-15 |           |           |  | VIPR2        |        |  |
| V3SVHSHC_7168781  | GPR133       |  | 1.173E-15 |           |           |  | GPR133       |        |  |
| V3SVHSHC_10792280 | CLEC6A       |  | 1.193E-15 |           |           |  | CLEC6A       |        |  |
| V3SVHSHC_9542603  | SIX6         |  | 1.226E-15 |           |           |  | SIX6         |        |  |
| V3SVHSHC_9951407  | VWA8         |  | 1.253E-15 |           |           |  | VWA8         |        |  |
| V3SVHSHC_7844126  | CLCNKA       |  | 1.263E-15 |           |           |  | CLCNKA       |        |  |
| V3SVHSHC_6978272  | CASP8        |  | 1.287E-15 |           |           |  | CASP8        |        |  |
| V3SVHSHC_7757336  | TNKS2        |  | 1.316E-15 |           |           |  | TNKS2        |        |  |
| V3SVHSHC_6363977  | DNALI1       |  | 1.331E-15 |           |           |  | DNALI1       |        |  |
| V3SVHSHC_5663288  | KIAA1683     |  | 1.342E-15 |           |           |  | KIAA1683     |        |  |
| V3SVHSHC_8258606  | ZNF131       |  | 1.350E-15 |           |           |  | ZNF131       |        |  |
| V3SVHSHC_5945240  | CSNK2A3      |  | 1.446E-15 |           |           |  | CSNK2A3      |        |  |
| V3SVHSHC_10580288 | ZWINT        |  | 1.520E-15 |           |           |  | ZWINT        |        |  |
| V3SVHSHC_8521781  | PIP5KL1      |  | 1.549E-15 |           |           |  | PIP5KL1      |        |  |
| V3SVHSHC_7408856  | CYB5RL       |  | 1.644E-15 |           |           |  | CYB5RL       |        |  |
| V3SVHSHC_4942700  | SYNJ2        |  | 1.705E-15 |           |           |  | SYNJ2        |        |  |
| V3SVHSHC_8082683  | KLRC4-KLRK1  |  | 1.740E-15 |           |           |  | KLRC4-KLRK1  |        |  |
| V3SVHSHC_7764926  | C8orf88      |  | 1.813E-15 |           |           |  | C8orf88      |        |  |
| V3SVHSHC_6445586  | Nprl2        |  | 1.820E-15 |           |           |  | Nprl2        |        |  |
| V3SVHSHC_7021568  | CDC25C       |  | 1.892E-15 |           |           |  | CDC25C       |        |  |
| V3SVHSHC_10755155 | FAM86C1      |  | 1.916E-15 |           |           |  | FAM86C1      |        |  |
| V3SVHSHC_10376447 | ANKLE2       |  | 1.970E-15 | 1.114E-16 |           |  | ANKLE2       | ANKLE2 |  |
| V3SVHSHC_9715391  | C11orf95     |  | 2.052E-15 |           |           |  | C11orf95     |        |  |
| V3SVHSHC_8639096  | DET1         |  | 2.120E-15 |           |           |  | DET1         |        |  |
| V3SVHSHC_9532175  | LOC100996720 |  | 2.142E-15 |           |           |  | LOC100996720 |        |  |

|                   |              |  |           |           |  |  |              |          |         |
|-------------------|--------------|--|-----------|-----------|--|--|--------------|----------|---------|
| V3SVHSHC_8893790  | LRRC14B      |  | 2.208E-15 |           |  |  | LRRC14B      |          |         |
| V3SVHSHC_5052920  | CD86         |  | 2.265E-15 |           |  |  | CD86         |          |         |
| V3SVHSHC_4941149  | ERBB2IP      |  | 2.367E-15 |           |  |  | ERBB2IP      |          |         |
| V3SVHSHC_6286229  | FEM1C        |  | 2.511E-15 |           |  |  | FEM1C        |          |         |
| V3SVHSHC_7961837  | PLEKHA4      |  | 2.544E-15 | 1.578E-04 |  |  | PLEKHA4      |          | PLEKHA4 |
| V3SVHSHC_6185546  | KCMF1        |  | 2.553E-15 |           |  |  | KCMF1        |          |         |
| V3SVHSHC_7545014  | EML3         |  | 2.710E-15 |           |  |  | EML3         |          |         |
| V3SVHSHC_10116044 | OR1J2        |  | 2.720E-15 |           |  |  | OR1J2        |          |         |
| V3SVHSHC_7560986  | OR4F6        |  | 2.783E-15 |           |  |  | OR4F6        |          |         |
| V3SVHSHC_9439874  | OTP          |  | 2.799E-15 |           |  |  | OTP          |          |         |
| V3SVHSHC_7272434  | RERE         |  | 2.807E-15 |           |  |  | RERE         |          |         |
| V3SVHSHC_6692294  | KLRG2        |  | 3.027E-15 |           |  |  | KLRG2        |          |         |
| V3SVHSHC_4850498  | ZNF80        |  | 3.092E-15 |           |  |  | ZNF80        |          |         |
| V3SVHSHC_10218443 | CADM3        |  | 3.166E-15 |           |  |  | CADM3        |          |         |
| V3SVHSHC_8927681  | KRAS         |  | 3.342E-15 |           |  |  | KRAS         |          |         |
| V3SVHSHC_8417105  | VNN1         |  | 3.350E-15 |           |  |  | VNN1         |          |         |
| V3SVHSHC_7480829  | OR6C70       |  | 3.484E-15 |           |  |  | OR6C70       |          |         |
| V3SVHSHC_6490895  | MAD1L1       |  | 3.652E-15 |           |  |  | MAD1L1       |          |         |
| V3SVHSHC_5724074  | LOC101929829 |  | 3.769E-15 |           |  |  | LOC101929829 |          |         |
| V3SVHSHC_9848810  | SLC9A5       |  | 3.820E-15 |           |  |  | SLC9A5       |          |         |
| V3SVHSHC_8423441  | RSPH10B      |  | 3.871E-15 |           |  |  | RSPH10B      |          |         |
| V3SVHSHC_8319689  | DDA1         |  | 3.937E-15 |           |  |  | DDA1         |          |         |
| V3SVHSHC_9523958  | OR11H12      |  | 4.278E-15 |           |  |  | OR11H12      |          |         |
| V3SVHSHC_5643752  | KANSL1L      |  | 4.313E-15 |           |  |  | KANSL1L      |          |         |
| V3SVHSHC_6294248  | PLCB4        |  | 4.362E-15 |           |  |  | PLCB4        |          |         |
| V3SVHSHC_9328532  | PML          |  | 4.479E-15 |           |  |  | PML          |          |         |
| V3SVHSHC_9000479  | KLRD1        |  | 4.495E-15 |           |  |  | KLRD1        |          |         |
| V3SVHSHC_9666782  | MMP16        |  | 4.513E-15 |           |  |  | MMP16        |          |         |
| V3SVHSHC_4775060  | TEX26        |  | 4.625E-15 |           |  |  | TEX26        |          |         |
| V3SVHSHC_10470695 | PQBP1        |  | 4.988E-15 |           |  |  | PQBP1        |          |         |
| V3SVHSHC_9421625  | CACNG1       |  | 5.192E-15 |           |  |  | CACNG1       |          |         |
| V3SVHSHC_9403112  | FAM127A      |  | 5.196E-15 |           |  |  | FAM127A      |          |         |
| V3SVHSHC_9842441  | LOC101060861 |  | 5.220E-15 |           |  |  | LOC101060861 |          |         |
| V3SVHSHC_7695890  | ZNF185       |  | 5.231E-15 |           |  |  | ZNF185       |          |         |
| V3SVHSHC_7984673  | PPFIA2       |  | 5.383E-15 |           |  |  | PPFIA2       |          |         |
| V3SVHSHC_9082781  | ENTPD8       |  | 5.590E-15 |           |  |  | ENTPD8       |          |         |
| V3SVHSHC_7592666  | TTC34        |  | 6.213E-15 |           |  |  | TTC34        |          |         |
| V3SVHSHC_5399354  | DAGLA        |  | 6.343E-15 |           |  |  | DAGLA        |          |         |
| V3SVHSHC_9040145  | CCDC107      |  | 6.422E-15 |           |  |  | CCDC107      |          |         |
| V3SVHSHC_4809446  | ATP6V0E1     |  | 7.285E-15 | 1.719E-18 |  |  | ATP6V0E1     | ATP6V0E1 |         |
| V3SVHSHC_6086711  | OPTC         |  | 7.487E-15 |           |  |  | OPTC         |          |         |
| V3SVHSHC_6564320  | RALGPS1      |  | 7.841E-15 |           |  |  | RALGPS1      |          |         |
| V3SVHSHC_5432585  | C2cd4a       |  | 8.267E-15 |           |  |  | C2cd4a       |          |         |
| V3SVHSHC_9921641  | UPP2         |  | 8.328E-15 |           |  |  | UPP2         |          |         |
| V3SVHSHC_9517160  | TMEM51       |  | 8.599E-15 |           |  |  | TMEM51       |          |         |
| V3SVHSHC_9426146  | REM1         |  | 9.101E-15 |           |  |  | REM1         |          |         |
| V3SVHSHC_5438591  | EHD1         |  | 1.068E-14 |           |  |  | EHD1         |          |         |
| V3SVHSHC_6429119  | IRX5         |  | 1.077E-14 |           |  |  | IRX5         |          |         |
| V3SVHSHC_10672622 | PCTP         |  | 1.123E-14 |           |  |  | PCTP         |          |         |
| V3SVHSHC_4872311  | KRTAP2-2     |  | 1.129E-14 |           |  |  | KRTAP2-2     |          |         |
| V3SVHSHC_4960256  | LYPD4        |  | 1.217E-14 |           |  |  | LYPD4        |          |         |
| V3SVHSHC_5376188  | SAG          |  | 1.225E-14 |           |  |  | SAG          |          |         |
| V3SVHSHC_5534423  | Tmem237      |  | 1.245E-14 |           |  |  | Tmem237      |          |         |



|                   |              |           |  |              |
|-------------------|--------------|-----------|--|--------------|
| V3SVHSHC_10655363 | KCNK1        | 1.279E-14 |  | KCNK1        |
| V3SVHSHC_9966356  | ZNF148       | 1.346E-14 |  | ZNF148       |
| V3SVHSHC_10767431 | ARHGAP40     | 1.354E-14 |  | ARHGAP40     |
| V3SVHSHC_8435882  | H2BFM        | 1.369E-14 |  | H2BFM        |
| V3SVHSHC_7124627  | RFPL4AL1     | 1.384E-14 |  | RFPL4AL1     |
| V3SVHSHC_9726578  | FBXL12       | 1.528E-14 |  | FBXL12       |
| V3SVHSHC_7559798  | ATP11AUN     | 1.573E-14 |  | ATP11AUN     |
| V3SVHSHC_10178909 | GATSL3       | 1.701E-14 |  | GATSL3       |
| V3SVHSHC_5480765  | GF11         | 1.751E-14 |  | GF11         |
| V3SVHSHC_6851750  | LRRTM3       | 1.766E-14 |  | LRRTM3       |
| V3SVHSHC_5855942  | KCNH2        | 1.785E-14 |  | KCNH2        |
| V3SVHSHC_9895010  | LTB4R2       | 1.788E-14 |  | LTB4R2       |
| V3SVHSHC_8439380  | HCAR1        | 1.789E-14 |  | HCAR1        |
| V3SVHSHC_9620021  | CCL19        | 1.807E-14 |  | CCL19        |
| V3SVHSHC_6475484  | ZEB2         | 1.819E-14 |  | ZEB2         |
| V3SVHSHC_9469838  | TLK2         | 1.886E-14 |  | TLK2         |
| V3SVHSHC_6718958  | PPP1R16B     | 1.891E-14 |  | PPP1R16B     |
| V3SVHSHC_7273721  | CNOT7        | 1.993E-14 |  | CNOT7        |
| V3SVHSHC_8920454  | SYT14        | 2.065E-14 |  | SYT14        |
| V3SVHSHC_6428195  | PTPN18       | 2.074E-14 |  | PTPN18       |
| V3SVHSHC_5009228  | APPBP2       | 2.121E-14 |  | APPBP2       |
| V3SVHSHC_5173007  | TMEM198      | 2.178E-14 |  | TMEM198      |
| V3SVHSHC_6626525  | ASB9         | 2.194E-14 |  | ASB9         |
| V3SVHSHC_9597185  | KRTAP5-5     | 2.379E-14 |  | KRTAP5-5     |
| V3SVHSHC_7747931  | C4ORF6       | 2.448E-14 |  | C4ORF6       |
| V3SVHSHC_5976557  | DLG1         | 2.451E-14 |  | DLG1         |
| V3SVHSHC_6053777  | GPS2         | 2.471E-14 |  | GPS2         |
| V3SVHSHC_9542141  | TNFRSF13C    | 2.485E-14 |  | TNFRSF13C    |
| V3SVHSHC_7008104  | PRSS21       | 2.619E-14 |  | PRSS21       |
| V3SVHSHC_6583922  | COL9A2       | 2.629E-14 |  | COL9A2       |
| V3SVHSHC_7796441  | KLHL1        | 2.731E-14 |  | KLHL1        |
| V3SVHSHC_5000747  | OR7C2        | 2.740E-14 |  | OR7C2        |
| V3SVHSHC_5501753  | KDSR         | 2.743E-14 |  | KDSR         |
| V3SVHSHC_7175315  | CTRC         | 2.850E-14 |  | CTRC         |
| V3SVHSHC_10535276 | GFPT2        | 2.901E-14 |  | GFPT2        |
| V3SVHSHC_6365759  | DGKG         | 2.976E-14 |  | DGKG         |
| V3SVHSHC_5646029  | SFXN3        | 3.082E-14 |  | SFXN3        |
| V3SVHSHC_8371400  | PSAPL1       | 3.135E-14 |  | PSAPL1       |
| V3SVHSHC_5081828  | LMO2         | 3.176E-14 |  | LMO2         |
| V3SVHSHC_9761063  | LOC101929451 | 3.333E-14 |  | LOC101929451 |
| V3SVHSHC_5645435  | PPRC1        | 3.481E-14 |  | PPRC1        |
| V3SVHSHC_10838513 | S100A4       | 3.535E-14 |  | S100A4       |
| V3SVHSHC_7766840  | FUT6         | 3.555E-14 |  | FUT6         |
| V3SVHSHC_7419218  | CCDC129      | 3.646E-14 |  | CCDC129      |
| V3SVHSHC_8204453  | RNF125       | 3.949E-14 |  | RNF125       |
| V3SVHSHC_8610617  | OR13C3       | 3.983E-14 |  | OR13C3       |
| V3SVHSHC_7016255  | NUS1         | 4.006E-14 |  | NUS1         |
| V3SVHSHC_7653089  | TCN2         | 4.033E-14 |  | TCN2         |
| V3SVHSHC_7763375  | TMTC1        | 4.214E-14 |  | TMTC1        |
| V3SVHSHC_7391300  | VRK3         | 4.332E-14 |  | VRK3         |
| V3SVHSHC_8329523  | CDPF1        | 4.380E-14 |  | CDPF1        |

|                   |           |  |           |           |  |  |           |      |       |
|-------------------|-----------|--|-----------|-----------|--|--|-----------|------|-------|
| V3SVHSHC_4685267  | BPIFB3    |  | 4.523E-14 |           |  |  | BPIFB3    |      |       |
| V3SVHSHC_5546930  | VSTM2B    |  | 4.719E-14 |           |  |  | VSTM2B    |      |       |
| V3SVHSHC_6980714  | MYO5B     |  | 4.911E-14 |           |  |  | MYO5B     |      |       |
| V3SVHSHC_7020908  | SLC27A3   |  | 5.012E-14 |           |  |  | SLC27A3   |      |       |
| V3SVHSHC_9296654  | RPUSD1    |  | 5.074E-14 |           |  |  | RPUSD1    |      |       |
| V3SVHSHC_7053083  | FHL5      |  | 5.165E-14 |           |  |  | FHL5      |      |       |
| V3SVHSHC_8180264  | SLMAP     |  | 5.683E-14 |           |  |  | SLMAP     |      |       |
| V3SVHSHC_10313384 | CXorf57   |  | 5.783E-14 |           |  |  | CXorf57   |      |       |
| V3SVHSHC_10610351 | DUT       |  | 5.803E-14 |           |  |  | DUT       |      |       |
| V3SVHSHC_5537525  | LOC645202 |  | 5.973E-14 |           |  |  | LOC645202 |      |       |
| V3SVHSHC_5040941  | ADD1      |  | 6.111E-14 | 3.168E-09 |  |  | ADD1      | ADD1 |       |
| V3SVHSHC_6861419  | RIPK1     |  | 6.138E-14 |           |  |  | RIPK1     |      |       |
| V3SVHSHC_6279431  | EHD4      |  | 6.194E-14 |           |  |  | EHD4      |      |       |
| V3SVHSHC_10752812 | C1orf56   |  | 6.215E-14 |           |  |  | C1orf56   |      |       |
| V3SVHSHC_10209566 | RANBP17   |  | 6.229E-14 |           |  |  | RANBP17   |      |       |
| V3SVHSHC_6122351  | LRCH4     |  | 6.282E-14 |           |  |  | LRCH4     |      |       |
| V3SVHSHC_9724367  | ANAPC7    |  | 6.411E-14 |           |  |  | ANAPC7    |      |       |
| V3SVHSHC_6586067  | RSPH4A    |  | 6.496E-14 |           |  |  | RSPH4A    |      |       |
| V3SVHSHC_8719517  | HS3ST6    |  | 6.770E-14 |           |  |  | HS3ST6    |      |       |
| V3SVHSHC_6033284  | STK38     |  | 6.845E-14 | 2.018E-06 |  |  | STK38     |      | STK38 |
| V3SVHSHC_7002593  | CCDC80    |  | 6.906E-14 |           |  |  | CCDC80    |      |       |
| V3SVHSHC_8198744  | GCA       |  | 7.106E-14 |           |  |  | GCA       |      |       |
| V3SVHSHC_9608867  | PAN2      |  | 7.291E-14 |           |  |  | PAN2      |      |       |
| V3SVHSHC_5906597  | LURAP1L   |  | 7.431E-14 |           |  |  | LURAP1L   |      |       |
| V3SVHSHC_8204618  | RBMY1J    |  | 7.637E-14 |           |  |  | RBMY1J    |      |       |
| V3SVHSHC_10350179 | MOSPD1    |  | 7.732E-14 |           |  |  | MOSPD1    |      |       |
| V3SVHSHC_7216763  | CABLES1   |  | 7.908E-14 |           |  |  | CABLES1   |      |       |
| V3SVHSHC_8390738  | DPCR1     |  | 8.664E-14 |           |  |  | DPCR1     |      |       |
| V3SVHSHC_7801358  | HNRNPD    |  | 8.752E-14 |           |  |  | HNRNPD    |      |       |
| V3SVHSHC_7144856  | IDH3G     |  | 9.281E-14 |           |  |  | IDH3G     |      |       |
| V3SVHSHC_10030310 | LHPP      |  | 9.510E-14 |           |  |  | LHPP      |      |       |
| V3SVHSHC_6090176  | UXT       |  | 1.013E-13 |           |  |  | UXT       |      |       |
| V3SVHSHC_5958572  | LRRC10B   |  | 1.023E-13 |           |  |  | LRRC10B   |      |       |
| V3SVHSHC_10224152 | OR56B4    |  | 1.069E-13 |           |  |  | OR56B4    |      |       |
| V3SVHSHC_8224781  | OR12D3    |  | 1.103E-13 |           |  |  | OR12D3    |      |       |
| V3SVHSHC_9809243  | SEPT8     |  | 1.145E-13 |           |  |  | SEPT8     |      |       |
| V3SVHSHC_8008598  | PMM2      |  | 1.157E-13 |           |  |  | PMM2      |      |       |
| V3SVHSHC_6696452  | EPS15     |  | 1.163E-13 |           |  |  | EPS15     |      |       |
| V3SVHSHC_5914451  | SENP2     |  | 1.173E-13 |           |  |  | SENP2     |      |       |
| V3SVHSHC_6197855  | NETO2     |  | 1.302E-13 |           |  |  | NETO2     |      |       |
| V3SVHSHC_10112579 | NTSR2     |  | 1.317E-13 |           |  |  | NTSR2     |      |       |
| V3SVHSHC_6162710  | ZNF500    |  | 1.448E-13 |           |  |  | ZNF500    |      |       |
| V3SVHSHC_5633126  | ZNF267    |  | 1.570E-13 |           |  |  | ZNF267    |      |       |
| V3SVHSHC_9147131  | TMEM30A   |  | 1.600E-13 |           |  |  | TMEM30A   |      |       |
| V3SVHSHC_10688627 | SYTL1     |  | 1.638E-13 |           |  |  | SYTL1     |      |       |
| V3SVHSHC_7262897  | ADAM8     |  | 1.673E-13 |           |  |  | ADAM8     |      |       |
| V3SVHSHC_8753078  | COL25A1   |  | 1.740E-13 |           |  |  | COL25A1   |      |       |
| V3SVHSHC_7857722  | MLLT3     |  | 1.799E-13 |           |  |  | MLLT3     |      |       |
| V3SVHSHC_4870100  | MARS2     |  | 1.842E-13 |           |  |  | MARS2     |      |       |
| V3SVHSHC_9068822  | PADI1     |  | 1.947E-13 | 7.765E-12 |  |  | PADI1     |      | PADI1 |
| V3SVHSHC_10765913 | HPGDS     |  | 1.949E-13 |           |  |  | HPGDS     |      |       |
| V3SVHSHC_8334011  | LHFPL3    |  | 1.998E-13 |           |  |  | LHFPL3    |      |       |
| V3SVHSHC_5326424  | ADPRHL2   |  | 2.001E-13 |           |  |  | ADPRHL2   |      |       |
| V3SVHSHC_4916069  | BIRC7     |  | 2.049E-13 |           |  |  | BIRC7     |      |       |

|                   |           |  |           |  |           |  |           |  |  |
|-------------------|-----------|--|-----------|--|-----------|--|-----------|--|--|
| V3SVHSHC_5284415  | GAL3ST1   |  | 2.069E-13 |  |           |  | GAL3ST1   |  |  |
| V3SVHSHC_6310913  | ANXA8L1   |  | 2.130E-13 |  |           |  | ANXA8L1   |  |  |
| V3SVHSHC_10764395 | GJA4      |  | 2.183E-13 |  |           |  | GJA4      |  |  |
| V3SVHSHC_9555374  | TCTEX1D1  |  | 2.234E-13 |  |           |  | TCTEX1D1  |  |  |
| V3SVHSHC_5636624  | ACTC1     |  | 2.330E-13 |  |           |  | ACTC1     |  |  |
| V3SVHSHC_7832114  | PDE4A     |  | 2.356E-13 |  |           |  | PDE4A     |  |  |
| V3SVHSHC_5117732  | CCNJ      |  | 2.357E-13 |  |           |  | CCNJ      |  |  |
| V3SVHSHC_7690148  | WTAP      |  | 2.363E-13 |  |           |  | WTAP      |  |  |
| V3SVHSHC_4719686  | TRAM1     |  | 2.430E-13 |  |           |  | TRAM1     |  |  |
| V3SVHSHC_6607220  | SERPINB10 |  | 2.460E-13 |  |           |  | SERPINB10 |  |  |
| V3SVHSHC_8516699  | TMC6      |  | 2.675E-13 |  |           |  | TMC6      |  |  |
| V3SVHSHC_6500333  | THBS4     |  | 2.731E-13 |  |           |  | THBS4     |  |  |
| V3SVHSHC_10206134 | BRF2      |  | 2.793E-13 |  |           |  | BRF2      |  |  |
| V3SVHSHC_9658598  | IL3       |  | 2.824E-13 |  |           |  | IL3       |  |  |
| V3SVHSHC_10091492 | GALNT1    |  | 2.903E-13 |  |           |  | GALNT1    |  |  |
| V3SVHSHC_8251148  | ATP5G2    |  | 2.934E-13 |  |           |  | ATP5G2    |  |  |
| V3SVHSHC_5531684  | TEAD1     |  | 2.945E-13 |  |           |  | TEAD1     |  |  |
| V3SVHSHC_10012325 | MCTP1     |  | 3.011E-13 |  |           |  | MCTP1     |  |  |
| V3SVHSHC_6961343  | TP53TG3D  |  | 3.019E-13 |  |           |  | TP53TG3D  |  |  |
| V3SVHSHC_9803798  | DEFA4     |  | 3.032E-13 |  |           |  | DEFA4     |  |  |
| V3SVHSHC_7073378  | ACTR3     |  | 3.079E-13 |  |           |  | ACTR3     |  |  |
| V3SVHSHC_8777828  | ALOXE3    |  | 3.383E-13 |  |           |  | ALOXE3    |  |  |
| V3SVHSHC_7976885  | MCC       |  | 3.444E-13 |  |           |  | MCC       |  |  |
| V3SVHSHC_9746642  | SCAMP5    |  | 3.492E-13 |  |           |  | SCAMP5    |  |  |
| V3SVHSHC_8418326  | PCDHGA11  |  | 3.533E-13 |  |           |  | PCDHGA11  |  |  |
| V3SVHSHC_9006419  | PRSS56    |  | 3.545E-13 |  |           |  | PRSS56    |  |  |
| V3SVHSHC_7314179  | C5orf66   |  | 3.584E-13 |  |           |  | C5orf66   |  |  |
| V3SVHSHC_6083741  | NLRP3     |  | 3.691E-13 |  |           |  | NLRP3     |  |  |
| V3SVHSHC_4962071  | C9orf16   |  | 3.856E-13 |  |           |  | C9orf16   |  |  |
| V3SVHSHC_10037075 | Haus8     |  | 4.094E-13 |  |           |  | Haus8     |  |  |
| V3SVHSHC_7652660  | PARP6     |  | 4.231E-13 |  |           |  | PARP6     |  |  |
| V3SVHSHC_8037176  | OR4M2     |  | 4.359E-13 |  |           |  | OR4M2     |  |  |
| V3SVHSHC_9390572  | RAET1E    |  | 4.576E-13 |  | 5.242E-03 |  | RAET1E    |  |  |
| V3SVHSHC_6459809  | FAM134B   |  | 4.754E-13 |  |           |  | FAM134B   |  |  |
| V3SVHSHC_8380904  | KBTBD6    |  | 4.856E-13 |  |           |  | KBTBD6    |  |  |
| V3SVHSHC_6840497  | ACSL5     |  | 4.949E-13 |  |           |  | ACSL5     |  |  |
| V3SVHSHC_4923461  | POFUT1    |  | 5.229E-13 |  |           |  | POFUT1    |  |  |
| V3SVHSHC_8670050  | SLC2A12   |  | 5.252E-13 |  |           |  | SLC2A12   |  |  |
| V3SVHSHC_10478978 | AEBP1     |  | 5.365E-13 |  |           |  | AEBP1     |  |  |
| V3SVHSHC_7065458  | RGS4      |  | 5.566E-13 |  |           |  | RGS4      |  |  |
| V3SVHSHC_10152410 | TPI1      |  | 5.707E-13 |  |           |  | TPI1      |  |  |
| V3SVHSHC_8390606  | LAMC2     |  | 5.725E-13 |  |           |  | LAMC2     |  |  |
| V3SVHSHC_6797894  | KIAA1377  |  | 5.832E-13 |  |           |  | KIAA1377  |  |  |
| V3SVHSHC_10214747 | ANKS1A    |  | 6.280E-13 |  |           |  | ANKS1A    |  |  |
| V3SVHSHC_8172344  | PRNP      |  | 6.345E-13 |  |           |  | PRNP      |  |  |
| V3SVHSHC_10814588 | FOXC1     |  | 6.394E-13 |  |           |  | FOXC1     |  |  |
| V3SVHSHC_10777298 | TCEA3     |  | 6.441E-13 |  |           |  | TCEA3     |  |  |
| V3SVHSHC_7308800  | FILIP1L   |  | 6.496E-13 |  |           |  | FILIP1L   |  |  |
| V3SVHSHC_9000314  | KLHDC2    |  | 6.784E-13 |  |           |  | KLHDC2    |  |  |
| V3SVHSHC_9818747  | ADPRHL1   |  | 7.401E-13 |  |           |  | ADPRHL1   |  |  |
| V3SVHSHC_8762450  | CD300C    |  | 7.803E-13 |  |           |  | CD300C    |  |  |

|                   |              |  |           |           |  |  |              |           |  |
|-------------------|--------------|--|-----------|-----------|--|--|--------------|-----------|--|
| V3SVHSHC_10482971 | ELP5         |  | 8.192E-13 |           |  |  | ELP5         |           |  |
| V3SVHSHC_8702027  | FAM198B      |  | 8.390E-13 |           |  |  | FAM198B      |           |  |
| V3SVHSHC_8690576  | PKD1L2       |  | 8.411E-13 |           |  |  | PKD1L2       |           |  |
| V3SVHSHC_5452616  | SFXN4        |  | 8.731E-13 |           |  |  | SFXN4        |           |  |
| V3SVHSHC_5359589  | RAD51        |  | 8.860E-13 |           |  |  | RAD51        |           |  |
| V3SVHSHC_8302463  | SUCLA2       |  | 8.910E-13 |           |  |  | SUCLA2       |           |  |
| V3SVHSHC_10271903 | KIAA1324L    |  | 8.944E-13 |           |  |  | KIAA1324L    |           |  |
| V3SVHSHC_5324147  | ARSA         |  | 9.040E-13 |           |  |  | ARSA         |           |  |
| V3SVHSHC_9607184  | ARSF         |  | 9.437E-13 |           |  |  | ARSF         |           |  |
| V3SVHSHC_8642924  | PDE1A        |  | 9.554E-13 |           |  |  | PDE1A        |           |  |
| V3SVHSHC_10663217 | SIDT1        |  | 9.559E-13 |           |  |  | SIDT1        |           |  |
| V3SVHSHC_8766641  | NEUROG2      |  | 9.775E-13 |           |  |  | NEUROG2      |           |  |
| V3SVHSHC_5321738  | MYO7B        |  | 1.056E-12 | 6.683E-14 |  |  | MYO7B        | MYO7B     |  |
| V3SVHSHC_6789083  | AICDA        |  | 1.067E-12 |           |  |  | AICDA        |           |  |
| V3SVHSHC_5782253  | LOC101927989 |  | 1.108E-12 |           |  |  | LOC101927989 |           |  |
| V3SVHSHC_9367406  | LOC730159    |  | 1.169E-12 |           |  |  | LOC730159    |           |  |
| V3SVHSHC_5472614  | TMEM151B     |  | 1.189E-12 |           |  |  | TMEM151B     |           |  |
| V3SVHSHC_9960845  | SHPRH        |  | 1.265E-12 |           |  |  | SHPRH        |           |  |
| V3SVHSHC_5943425  | WISP3        |  | 1.285E-12 |           |  |  | WISP3        |           |  |
| V3SVHSHC_9185774  | USF1         |  | 1.287E-12 |           |  |  | USF1         |           |  |
| V3SVHSHC_6602072  | PCDHGB4      |  | 1.311E-12 |           |  |  | PCDHGB4      |           |  |
| V3SVHSHC_9394565  | HNRNPU       |  | 1.322E-12 |           |  |  | HNRNPU       |           |  |
| V3SVHSHC_7883231  | PMM2         |  | 1.345E-12 |           |  |  | PMM2         |           |  |
| V3SVHSHC_6605372  | KAT6A        |  | 1.364E-12 |           |  |  | KAT6A        |           |  |
| V3SVHSHC_7586198  | ZNF273       |  | 1.396E-12 |           |  |  | ZNF273       |           |  |
| V3SVHSHC_7427171  | GSPT2        |  | 1.478E-12 |           |  |  | GSPT2        |           |  |
| V3SVHSHC_7883858  | C6ORF165     |  | 1.537E-12 |           |  |  | C6ORF165     |           |  |
| V3SVHSHC_7165811  | LOC101930300 |  | 1.609E-12 |           |  |  | LOC101930300 |           |  |
| V3SVHSHC_6582965  | KRTAP5-9     |  | 1.687E-12 |           |  |  | KRTAP5-9     |           |  |
| V3SVHSHC_8145515  | LOC100288562 |  | 1.777E-12 |           |  |  | LOC100288562 |           |  |
| V3SVHSHC_8279561  | CTSG         |  | 1.790E-12 |           |  |  | CTSG         |           |  |
| V3SVHSHC_7569566  | PPP2R5D      |  | 1.800E-12 |           |  |  | PPP2R5D      |           |  |
| V3SVHSHC_7027310  | PTGR2        |  | 1.850E-12 |           |  |  | PTGR2        |           |  |
| V3SVHSHC_6363482  | GRP          |  | 1.866E-12 |           |  |  | GRP          |           |  |
| V3SVHSHC_9867455  | PTGES3       |  | 2.169E-12 |           |  |  | PTGES3       |           |  |
| V3SVHSHC_7124033  | TAOK1        |  | 2.190E-12 |           |  |  | TAOK1        |           |  |
| V3SVHSHC_10246592 | RRM2B        |  | 2.220E-12 |           |  |  | RRM2B        |           |  |
| V3SVHSHC_8387438  | SPRN         |  | 2.260E-12 |           |  |  | SPRN         |           |  |
| V3SVHSHC_8158913  | LOC651959    |  | 2.333E-12 |           |  |  | LOC651959    |           |  |
| V3SVHSHC_6465683  | SFRP5        |  | 2.461E-12 |           |  |  | SFRP5        |           |  |
| V3SVHSHC_6534686  | SHFM1        |  | 2.492E-12 |           |  |  | SHFM1        |           |  |
| V3SVHSHC_7907783  | KRTAP10-7    |  | 2.550E-12 | 5.157E-04 |  |  | KRTAP10-7    | KRTAP10-7 |  |
| V3SVHSHC_9265304  | OLFML1       |  | 2.781E-12 |           |  |  | OLFML1       |           |  |
| V3SVHSHC_4855514  | EZH1         |  | 2.868E-12 |           |  |  | EZH1         |           |  |
| V3SVHSHC_5104103  | CALY         |  | 2.912E-12 |           |  |  | CALY         |           |  |
| V3SVHSHC_10644737 | TCERG1L      |  | 2.929E-12 |           |  |  | TCERG1L      |           |  |
| V3SVHSHC_10277843 | SFTPC        |  | 3.004E-12 |           |  |  | SFTPC        |           |  |
| V3SVHSHC_8796836  | LMOD3        |  | 3.021E-12 | 1.256E-30 |  |  | LMOD3        | LMOD3     |  |

|                   |              |  |           |           |           |  |  |              |              |      |
|-------------------|--------------|--|-----------|-----------|-----------|--|--|--------------|--------------|------|
| V3SVHSHC_8985563  | HES2         |  | 3.173E-12 |           |           |  |  | HES2         |              |      |
| V3SVHSHC_9574052  | KDM5C        |  | 3.290E-12 |           |           |  |  | KDM5C        |              |      |
| V3SVHSHC_8126936  | NHEJ1        |  | 3.318E-12 |           |           |  |  | NHEJ1        |              |      |
| V3SVHSHC_7369091  | SMYD5        |  | 3.354E-12 |           |           |  |  | SMYD5        |              |      |
| V3SVHSHC_9555407  | RGS21        |  | 3.625E-12 |           |           |  |  | RGS21        |              |      |
| V3SVHSHC_5774663  | TVP23B       |  | 3.646E-12 |           |           |  |  | TVP23B       |              |      |
| V3SVHSHC_9758324  | TRPM4        |  | 3.647E-12 |           |           |  |  | TRPM4        |              |      |
| V3SVHSHC_6525413  | VAC14        |  | 3.847E-12 |           |           |  |  | VAC14        |              |      |
| V3SVHSHC_10202174 | PAQR6        |  | 4.076E-12 | 9.916E-28 |           |  |  | PAQR6        | PAQR6        |      |
| V3SVHSHC_7043909  | EBI3         |  | 4.181E-12 |           |           |  |  | EBI3         |              |      |
| V3SVHSHC_10561412 | ZNF92        |  | 4.312E-12 |           |           |  |  | ZNF92        |              |      |
| V3SVHSHC_8697176  | KRTAP7-1     |  | 4.349E-12 |           |           |  |  | KRTAP7-1     |              |      |
| V3SVHSHC_9695657  | NMUR1        |  | 4.374E-12 |           |           |  |  | NMUR1        |              |      |
| V3SVHSHC_7793966  | GRXCR1       |  | 4.418E-12 |           |           |  |  | GRXCR1       |              |      |
| V3SVHSHC_7070573  | GLIS2        |  | 4.473E-12 |           |           |  |  | GLIS2        |              |      |
| V3SVHSHC_8653550  | GSTT2B       |  | 4.484E-12 |           |           |  |  | GSTT2B       |              |      |
| V3SVHSHC_6478751  | ZNF737       |  | 4.546E-12 |           |           |  |  | ZNF737       |              |      |
| V3SVHSHC_7122548  | ZNF284       |  | 4.556E-12 |           |           |  |  | ZNF284       |              |      |
| V3SVHSHC_10708691 | LSMEM1       |  | 4.562E-12 |           |           |  |  | LSMEM1       |              |      |
| V3SVHSHC_6426710  | ZNF177       |  | 4.597E-12 |           |           |  |  | ZNF177       |              |      |
| V3SVHSHC_6160829  | PCDHA1       |  | 4.655E-12 |           |           |  |  | PCDHA1       |              |      |
| V3SVHSHC_5901350  | TOMM7        |  | 4.680E-12 | 5.960E-22 |           |  |  | TOMM7        | TOMM7        |      |
| V3SVHSHC_5925902  | SLC6A5       |  | 4.722E-12 |           |           |  |  | SLC6A5       |              |      |
| V3SVHSHC_9480035  | Fam181b      |  | 4.726E-12 |           |           |  |  | Fam181b      |              |      |
| V3SVHSHC_7029290  | TRPC5OS      |  | 5.141E-12 |           |           |  |  | TRPC5OS      |              |      |
| V3SVHSHC_5722688  | TENM3        |  | 5.236E-12 |           |           |  |  | TENM3        |              |      |
| V3SVHSHC_5467367  | PRC1         |  | 5.674E-12 |           | 5.081E-12 |  |  | PRC1         |              | PRC1 |
| V3SVHSHC_6752420  | AMER2        |  | 5.690E-12 |           |           |  |  | AMER2        |              |      |
| V3SVHSHC_4727012  | EXOC1        |  | 5.817E-12 |           |           |  |  | EXOC1        |              |      |
| V3SVHSHC_6664277  | SNAP23       |  | 5.877E-12 |           |           |  |  | SNAP23       |              |      |
| V3SVHSHC_7268936  | FOSL2        |  | 5.900E-12 |           |           |  |  | FOSL2        |              |      |
| V3SVHSHC_4990484  | MYO1C        |  | 6.301E-12 |           |           |  |  | MYO1C        |              |      |
| V3SVHSHC_8004572  | PAK1IP1      |  | 6.419E-12 |           |           |  |  | PAK1IP1      |              |      |
| V3SVHSHC_5705462  | GGT6         |  | 6.610E-12 |           |           |  |  | GGT6         |              |      |
| V3SVHSHC_6086942  | NXN          |  | 6.759E-12 |           |           |  |  | NXN          |              |      |
| V3SVHSHC_9465779  | BANF1        |  | 7.328E-12 |           |           |  |  | BANF1        |              |      |
| V3SVHSHC_8132282  | Mob1b        |  | 7.647E-12 |           |           |  |  | Mob1b        |              |      |
| V3SVHSHC_7987874  | UGT2B17      |  | 8.088E-12 |           |           |  |  | UGT2B17      |              |      |
| V3SVHSHC_9618338  | DEFB107A     |  | 8.096E-12 |           |           |  |  | DEFB107A     |              |      |
| V3SVHSHC_7033250  | SMARCA2      |  | 8.694E-12 |           |           |  |  | SMARCA2      |              |      |
| V3SVHSHC_6055130  | RRAS         |  | 8.975E-12 |           |           |  |  | RRAS         |              |      |
| V3SVHSHC_7260323  | KIAA1377     |  | 9.643E-12 |           |           |  |  | KIAA1377     |              |      |
| V3SVHSHC_4842644  | CARM1        |  | 1.002E-11 |           |           |  |  | CARM1        |              |      |
| V3SVHSHC_5592767  | CPNE4        |  | 1.028E-11 |           |           |  |  | CPNE4        |              |      |
| V3SVHSHC_5584979  | HELLS        |  | 1.039E-11 |           |           |  |  | HELLS        |              |      |
| V3SVHSHC_9145382  | LRRC43       |  | 1.046E-11 |           |           |  |  | LRRC43       |              |      |
| V3SVHSHC_7213232  | XPNPEP1      |  | 1.065E-11 |           |           |  |  | XPNPEP1      |              |      |
| V3SVHSHC_10371563 | TMEM216      |  | 1.102E-11 |           |           |  |  | TMEM216      |              |      |
| V3SVHSHC_6894683  | VAMP1        |  | 1.172E-11 |           |           |  |  | VAMP1        |              |      |
| V3SVHSHC_6945503  | GATS         |  | 1.201E-11 |           |           |  |  | GATS         |              |      |
| V3SVHSHC_5649791  | SMTNL1       |  | 1.261E-11 |           |           |  |  | SMTNL1       |              |      |
| V3SVHSHC_5898149  | FAM160B2     |  | 1.318E-11 |           |           |  |  | FAM160B2     |              |      |
| V3SVHSHC_5751233  | ARHGAP9      |  | 1.323E-11 |           |           |  |  | ARHGAP9      |              |      |
| V3SVHSHC_9398657  | LOC100132731 |  | 1.344E-11 | 1.342E-07 |           |  |  | LOC100132731 | LOC100132731 |      |

|                   |              |  |           |           |           |  |              |       |      |
|-------------------|--------------|--|-----------|-----------|-----------|--|--------------|-------|------|
| V3SVHSHC_9387107  | POLR2K       |  | 1.368E-11 |           |           |  | POLR2K       |       |      |
| V3SVHSHC_6629660  | DNM3         |  | 1.369E-11 |           |           |  | DNM3         |       |      |
| V3SVHSHC_7510661  | PARP16       |  | 1.377E-11 |           |           |  | PARP16       |       |      |
| V3SVHSHC_10131653 | CDKL3        |  | 1.395E-11 |           |           |  | CDKL3        |       |      |
| V3SVHSHC_6212111  | LAT2         |  | 1.551E-11 |           | 1.643E-15 |  | LAT2         |       | LAT2 |
| V3SVHSHC_7209569  | TCP11L1      |  | 1.566E-11 |           |           |  | TCP11L1      |       |      |
| V3SVHSHC_8656157  | ASPH         |  | 1.569E-11 |           |           |  | ASPH         |       |      |
| V3SVHSHC_10746707 | TMEM206      |  | 1.576E-11 |           |           |  | TMEM206      |       |      |
| V3SVHSHC_6279233  | ZNF155       |  | 1.594E-11 |           |           |  | ZNF155       |       |      |
| V3SVHSHC_10657904 | VPS37B       |  | 1.628E-11 |           |           |  | VPS37B       |       |      |
| V3SVHSHC_8107730  | PQBP1        |  | 1.733E-11 |           |           |  | PQBP1        |       |      |
| V3SVHSHC_7943324  | HIAT1        |  | 1.801E-11 |           |           |  | HIAT1        |       |      |
| V3SVHSHC_4996820  | PHIP         |  | 1.874E-11 |           |           |  | PHIP         |       |      |
| V3SVHSHC_9099446  | SOS2         |  | 1.903E-11 |           |           |  | SOS2         |       |      |
| V3SVHSHC_9656189  | GAGE12J      |  | 2.030E-11 |           |           |  | GAGE12J      |       |      |
| V3SVHSHC_10785977 | OTUD6B       |  | 2.113E-11 |           |           |  | OTUD6B       |       |      |
| V3SVHSHC_7479707  | RAB3GAP2     |  | 2.141E-11 |           |           |  | RAB3GAP2     |       |      |
| V3SVHSHC_4654148  | Krt222       |  | 2.154E-11 |           |           |  | Krt222       |       |      |
| V3SVHSHC_5616362  | IL1RL1       |  | 2.181E-11 |           |           |  | IL1RL1       |       |      |
| V3SVHSHC_5215115  | PDCD1        |  | 2.338E-11 | 1.936E-10 |           |  | PDCD1        | PDCD1 |      |
| V3SVHSHC_9940979  | PAQR6        |  | 2.371E-11 |           |           |  | PAQR6        |       |      |
| V3SVHSHC_8431295  | C1orf68      |  | 2.414E-11 |           |           |  | C1orf68      |       |      |
| V3SVHSHC_6534257  | C8orf33      |  | 2.444E-11 |           |           |  | C8orf33      |       |      |
| V3SVHSHC_5632565  | KRT35        |  | 2.476E-11 |           |           |  | KRT35        |       |      |
| V3SVHSHC_6307943  | SLC16A4      |  | 2.583E-11 |           |           |  | SLC16A4      |       |      |
| V3SVHSHC_10126736 | FOS          |  | 2.648E-11 |           |           |  | FOS          |       |      |
| V3SVHSHC_7188515  | OR6C74       |  | 2.680E-11 |           |           |  | OR6C74       |       |      |
| V3SVHSHC_6068396  | C1orf162     |  | 2.708E-11 |           |           |  | C1orf162     |       |      |
| V3SVHSHC_6054833  | ATAD5        |  | 2.753E-11 |           |           |  | ATAD5        |       |      |
| V3SVHSHC_9005528  | SLC25A40     |  | 2.840E-11 |           |           |  | SLC25A40     |       |      |
| V3SVHSHC_8554616  | C5orf38      |  | 2.912E-11 |           |           |  | C5orf38      |       |      |
| V3SVHSHC_8765915  | KIT          |  | 2.940E-11 |           |           |  | KIT          |       |      |
| V3SVHSHC_10557518 | ISM2         |  | 2.947E-11 |           |           |  | ISM2         |       |      |
| V3SVHSHC_9280583  | ITPR2        |  | 3.067E-11 |           |           |  | ITPR2        |       |      |
| V3SVHSHC_4647680  | OR2L8        |  | 3.145E-11 |           |           |  | OR2L8        |       |      |
| V3SVHSHC_10094957 | SFTA2        |  | 3.226E-11 |           |           |  | SFTA2        |       |      |
| V3SVHSHC_6771593  | RAD54L2      |  | 3.516E-11 |           |           |  | RAD54L2      |       |      |
| V3SVHSHC_6370445  | SETD7        |  | 3.623E-11 |           |           |  | SETD7        |       |      |
| V3SVHSHC_5615141  | N6AMT1       |  | 3.632E-11 |           |           |  | N6AMT1       |       |      |
| V3SVHSHC_4788293  | KIAA1024L    |  | 3.780E-11 |           |           |  | KIAA1024L    |       |      |
| V3SVHSHC_9310646  | NFKBIB       |  | 3.879E-11 |           |           |  | NFKBIB       |       |      |
| V3SVHSHC_6420605  | LOC100652807 |  | 3.943E-11 |           |           |  | LOC100652807 |       |      |
| V3SVHSHC_10185905 | SLC22A24     |  | 3.987E-11 |           |           |  | SLC22A24     |       |      |
| V3SVHSHC_9036713  | AARSD1       |  | 4.047E-11 |           |           |  | AARSD1       |       |      |
| V3SVHSHC_6368795  | SEC31B       |  | 4.166E-11 |           |           |  | SEC31B       |       |      |
| V3SVHSHC_10195310 | SLC35B1      |  | 4.290E-11 |           |           |  | SLC35B1      |       |      |
| V3SVHSHC_9751064  | CGB8         |  | 4.644E-11 |           |           |  | CGB8         |       |      |
| V3SVHSHC_8118158  | TCF12        |  | 4.736E-11 |           |           |  | TCF12        |       |      |
| V3SVHSHC_6057341  | RAP2B        |  | 4.746E-11 |           |           |  | RAP2B        |       |      |
| V3SVHSHC_8465912  | TPSD1        |  | 4.773E-11 |           |           |  | TPSD1        |       |      |
| V3SVHSHC_9613586  | C9orf163     |  | 4.939E-11 |           |           |  | C9orf163     |       |      |
| V3SVHSHC_10330478 | TACC2        |  | 5.176E-11 |           |           |  | TACC2        |       |      |

|                   |              |  |           |           |           |  |              |      |  |
|-------------------|--------------|--|-----------|-----------|-----------|--|--------------|------|--|
| V3SVHSHC_9358100  | GAPDHS       |  | 5.196E-11 |           |           |  | GAPDHS       |      |  |
| V3SVHSHC_8444462  | ZCCHC4       |  | 5.339E-11 |           |           |  | ZCCHC4       |      |  |
| V3SVHSHC_9170759  | C19orf48     |  | 5.358E-11 |           |           |  | C19orf48     |      |  |
| V3SVHSHC_8697011  | SES2         |  | 5.428E-11 |           |           |  | SES2         |      |  |
| V3SVHSHC_10762844 | RNF7         |  | 5.556E-11 |           |           |  | RNF7         |      |  |
| V3SVHSHC_4846736  | Snmp25       |  | 5.955E-11 |           | 3.774E-03 |  | Snmp25       |      |  |
| V3SVHSHC_6536600  | GIN1         |  | 5.995E-11 |           |           |  | GIN1         |      |  |
| V3SVHSHC_10109345 | TNFRSF6B     |  | 6.316E-11 |           |           |  | TNFRSF6B     |      |  |
| V3SVHSHC_9065951  | AQP1         |  | 6.367E-11 |           |           |  | AQP1         |      |  |
| V3SVHSHC_6793406  | DLX1         |  | 6.520E-11 | 8.107E-38 |           |  | DLX1         | DLX1 |  |
| V3SVHSHC_9441557  | CD74         |  | 6.520E-11 |           |           |  | CD74         |      |  |
| V3SVHSHC_6906530  | PDHA1        |  | 6.530E-11 |           |           |  | PDHA1        |      |  |
| V3SVHSHC_5582207  | FABP5        |  | 6.590E-11 |           |           |  | FABP5        |      |  |
| V3SVHSHC_8291243  | NDUFA11      |  | 6.728E-11 |           |           |  | NDUFA11      |      |  |
| V3SVHSHC_6156440  | TTC4         |  | 7.733E-11 |           |           |  | TTC4         |      |  |
| V3SVHSHC_4771793  | VBP1         |  | 7.759E-11 |           |           |  | VBP1         |      |  |
| V3SVHSHC_4838024  | SCARA5       |  | 7.784E-11 |           |           |  | SCARA5       |      |  |
| V3SVHSHC_7727207  | GIF          |  | 8.179E-11 |           |           |  | GIF          |      |  |
| V3SVHSHC_10719812 | DCDC2C       |  | 8.242E-11 |           |           |  | DCDC2C       |      |  |
| V3SVHSHC_10597118 | LOC101928951 |  | 8.326E-11 |           |           |  | LOC101928951 |      |  |
| V3SVHSHC_10389515 | EEF2         |  | 8.367E-11 |           |           |  | EEF2         |      |  |
| V3SVHSHC_7829804  | MSC          |  | 9.020E-11 |           |           |  | MSC          |      |  |
| V3SVHSHC_7213364  | KDR          |  | 9.642E-11 |           |           |  | KDR          |      |  |
| V3SVHSHC_8691302  | FUCA1        |  | 9.968E-11 |           |           |  | FUCA1        |      |  |
| V3SVHSHC_8232074  | ZNF518B      |  | 1.003E-10 |           |           |  | ZNF518B      |      |  |
| V3SVHSHC_9555440  | CELSR1       |  | 1.092E-10 |           |           |  | CELSR1       |      |  |
| V3SVHSHC_6901118  | OR13D1       |  | 1.160E-10 |           |           |  | OR13D1       |      |  |
| V3SVHSHC_9975233  | PCDHGA1      |  | 1.219E-10 |           |           |  | PCDHGA1      |      |  |
| V3SVHSHC_9379781  | TRIM42       |  | 1.252E-10 |           |           |  | TRIM42       |      |  |
| V3SVHSHC_7330646  | EPN2         |  | 1.264E-10 |           |           |  | EPN2         |      |  |
| V3SVHSHC_9497756  | PCDHGB4      |  | 1.309E-10 |           |           |  | PCDHGB4      |      |  |
| V3SVHSHC_10601507 | TYMP         |  | 1.310E-10 |           |           |  | TYMP         |      |  |
| V3SVHSHC_6522938  | FAM151A      |  | 1.326E-10 |           |           |  | FAM151A      |      |  |
| V3SVHSHC_10610714 | PAOX         |  | 1.398E-10 |           |           |  | PAOX         |      |  |
| V3SVHSHC_5705990  | Slc46a2      |  | 1.422E-10 |           |           |  | Slc46a2      |      |  |
| V3SVHSHC_8435750  | DZANK1       |  | 1.449E-10 |           |           |  | DZANK1       |      |  |
| V3SVHSHC_7640450  | EDN3         |  | 1.563E-10 |           |           |  | EDN3         |      |  |
| V3SVHSHC_10756937 | MTRNR2L4     |  | 1.587E-10 |           |           |  | MTRNR2L4     |      |  |
| V3SVHSHC_7864322  | SH2B3        |  | 1.649E-10 |           |           |  | SH2B3        |      |  |
| V3SVHSHC_8505050  | PADI1        |  | 1.718E-10 |           |           |  | PADI1        |      |  |
| V3SVHSHC_8994209  | NAMPT        |  | 1.725E-10 |           | 3.123E-01 |  | NAMPT        |      |  |
| V3SVHSHC_5580755  | ZSCAN23      |  | 1.761E-10 |           |           |  | ZSCAN23      |      |  |
| V3SVHSHC_9677507  | CCL11        |  | 1.841E-10 |           |           |  | CCL11        |      |  |
| V3SVHSHC_10663547 | MYO3A        |  | 1.881E-10 |           |           |  | MYO3A        |      |  |
| V3SVHSHC_8817230  | TMEM9        |  | 1.901E-10 |           |           |  | TMEM9        |      |  |
| V3SVHSHC_5820038  | TRIM62       |  | 1.957E-10 |           |           |  | TRIM62       |      |  |
| V3SVHSHC_7497857  | KLRK1        |  | 2.006E-10 |           |           |  | KLRK1        |      |  |
| V3SVHSHC_4721171  | C2ORF16      |  | 2.120E-10 |           |           |  | C2ORF16      |      |  |
| V3SVHSHC_6693416  | KRT75        |  | 2.199E-10 |           |           |  | KRT75        |      |  |
| V3SVHSHC_6281114  | RASGRP3      |  | 2.249E-10 |           |           |  | RASGRP3      |      |  |
| V3SVHSHC_8996024  | PCDHGC4      |  | 2.350E-10 |           |           |  | PCDHGC4      |      |  |

|                   |              |  |           |           |           |  |  |              |              |              |
|-------------------|--------------|--|-----------|-----------|-----------|--|--|--------------|--------------|--------------|
| V3SVHSHC_8209271  | LOC101929950 |  | 2.484E-10 |           |           |  |  | LOC101929950 |              |              |
| V3SVHSHC_6799280  | NXPE2        |  | 2.571E-10 |           |           |  |  | NXPE2        |              |              |
| V3SVHSHC_8907782  | OR52N2       |  | 2.694E-10 | 1.773E-25 |           |  |  | OR52N2       | OR52N2       |              |
| V3SVHSHC_8979227  | TMEM67       |  | 2.840E-10 |           |           |  |  | TMEM67       |              |              |
| V3SVHSHC_7188878  | ZBTB8B       |  | 2.856E-10 |           |           |  |  | ZBTB8B       |              |              |
| V3SVHSHC_9008795  | BACE2        |  | 2.921E-10 |           |           |  |  | BACE2        |              |              |
| V3SVHSHC_8405984  | C22orf46     |  | 2.921E-10 |           |           |  |  | C22orf46     |              |              |
| V3SVHSHC_10252004 | SHISA4       |  | 3.046E-10 |           |           |  |  | SHISA4       |              |              |
| V3SVHSHC_6927650  | WHSC1L1      |  | 3.095E-10 |           |           |  |  | WHSC1L1      |              |              |
| V3SVHSHC_7443308  | LSM11        |  | 3.097E-10 |           |           |  |  | LSM11        |              |              |
| V3SVHSHC_6986423  | SMAD2        |  | 3.362E-10 |           |           |  |  | SMAD2        |              |              |
| V3SVHSHC_7433837  | DUSP26       |  | 3.460E-10 |           |           |  |  | DUSP26       |              |              |
| V3SVHSHC_6313652  | FXYP4        |  | 3.569E-10 |           |           |  |  | FXYP4        |              |              |
| V3SVHSHC_10794293 | CPO          |  | 3.707E-10 | 1.277E-10 |           |  |  | CPO          | CPO          |              |
| V3SVHSHC_6737570  | Krtdap       |  | 3.751E-10 |           |           |  |  | Krtdap       |              |              |
| V3SVHSHC_8994011  | TMEM165      |  | 3.828E-10 |           | 2.560E-04 |  |  | TMEM165      |              | TMEM165      |
| V3SVHSHC_5206337  | FAM107B      |  | 3.975E-10 |           |           |  |  | FAM107B      |              |              |
| V3SVHSHC_7812248  | OR11H4       |  | 4.043E-10 |           |           |  |  | OR11H4       |              |              |
| V3SVHSHC_9705953  | B3GAT2       |  | 4.158E-10 |           |           |  |  | B3GAT2       |              |              |
| V3SVHSHC_10734068 | INPP5D       |  | 4.173E-10 |           |           |  |  | INPP5D       |              |              |
| V3SVHSHC_5137994  | TRPV1        |  | 4.323E-10 |           |           |  |  | TRPV1        |              |              |
| V3SVHSHC_9934247  | ZNF845       |  | 5.070E-10 |           |           |  |  | ZNF845       |              |              |
| V3SVHSHC_8576330  | NAB1         |  | 5.075E-10 |           | 1.153E-14 |  |  | NAB1         |              | NAB1         |
| V3SVHSHC_9830660  | VN1R2        |  | 5.123E-10 |           |           |  |  | VN1R2        |              |              |
| V3SVHSHC_9236198  | ABCC4        |  | 5.178E-10 |           |           |  |  | ABCC4        |              |              |
| V3SVHSHC_7874882  | SLC10A5      |  | 5.237E-10 |           |           |  |  | SLC10A5      |              |              |
| V3SVHSHC_5612501  | LOC100996906 |  | 5.237E-10 |           |           |  |  | LOC100996906 |              |              |
| V3SVHSHC_8547851  | GRPEL2       |  | 5.345E-10 |           |           |  |  | GRPEL2       |              |              |
| V3SVHSHC_5123639  | BNIP2        |  | 5.519E-10 |           |           |  |  | BNIP2        |              |              |
| V3SVHSHC_5253857  | SCAMP2       |  | 5.633E-10 |           |           |  |  | SCAMP2       |              |              |
| V3SVHSHC_6123803  | FAM195B      |  | 6.021E-10 | 4.889E-28 |           |  |  | FAM195B      | FAM195B      |              |
| V3SVHSHC_5821523  | CHRNA9       |  | 6.023E-10 |           |           |  |  | CHRNA9       |              |              |
| V3SVHSHC_8328500  | ZNF793       |  | 6.157E-10 |           |           |  |  | ZNF793       |              |              |
| V3SVHSHC_8278208  | SLC2A2       |  | 6.349E-10 |           |           |  |  | SLC2A2       |              |              |
| V3SVHSHC_10138979 | SECISBP2     |  | 6.357E-10 |           |           |  |  | SECISBP2     |              |              |
| V3SVHSHC_9188084  | GNA14        |  | 6.527E-10 |           |           |  |  | GNA14        |              |              |
| V3SVHSHC_10406741 | CHAF1A       |  | 6.548E-10 |           |           |  |  | CHAF1A       |              |              |
| V3SVHSHC_9432515  | Haus7        |  | 6.782E-10 |           |           |  |  | Haus7        |              |              |
| V3SVHSHC_4654247  | LOC101928892 |  | 6.824E-10 | 7.027E-18 |           |  |  | LOC101928892 | LOC101928892 |              |
| V3SVHSHC_4896500  | CTNNB1       |  | 6.827E-10 |           |           |  |  | CTNNB1       |              |              |
| V3SVHSHC_5336819  | GK           |  | 6.920E-10 |           |           |  |  | GK           |              |              |
| V3SVHSHC_7317644  | CDK19        |  | 6.945E-10 |           |           |  |  | CDK19        |              |              |
| V3SVHSHC_10668398 | RFT1         |  | 7.196E-10 |           |           |  |  | RFT1         |              |              |
| V3SVHSHC_8954345  | SLC9B1       |  | 7.271E-10 |           |           |  |  | SLC9B1       |              |              |
| V3SVHSHC_5266991  | C21ORF33     |  | 7.404E-10 |           |           |  |  | C21ORF33     |              |              |
| V3SVHSHC_8434430  | SLC10A1      |  | 7.462E-10 |           |           |  |  | SLC10A1      |              |              |
| V3SVHSHC_4941710  | S1PR5        |  | 7.905E-10 |           |           |  |  | S1PR5        |              |              |
| V3SVHSHC_10798550 | MUC3B        |  | 7.952E-10 |           |           |  |  | MUC3B        |              |              |
| V3SVHSHC_6451328  | PARP10       |  | 8.037E-10 |           |           |  |  | PARP10       |              |              |
| V3SVHSHC_6093938  | ROPN1L       |  | 8.412E-10 |           |           |  |  | ROPN1L       |              |              |
| V3SVHSHC_8707703  | LOC101930400 |  | 8.790E-10 |           | 3.100E-16 |  |  | LOC101930400 |              | LOC101930400 |



|                   |              |  |           |           |  |  |              |  |      |
|-------------------|--------------|--|-----------|-----------|--|--|--------------|--|------|
| V3SVHSHC_10162376 | NLRP14       |  | 8.954E-10 |           |  |  | NLRP14       |  |      |
| V3SVHSHC_9393311  | BCKDHA       |  | 9.182E-10 |           |  |  | BCKDHA       |  |      |
| V3SVHSHC_7682657  | ASB4         |  | 9.713E-10 |           |  |  | ASB4         |  |      |
| V3SVHSHC_9391067  | TEDDM1       |  | 9.784E-10 |           |  |  | TEDDM1       |  |      |
| V3SVHSHC_8649194  | LOC101930432 |  | 1.010E-09 |           |  |  | LOC101930432 |  |      |
| V3SVHSHC_7574549  | HLA-DOB      |  | 1.026E-09 |           |  |  | HLA-DOB      |  |      |
| V3SVHSHC_9518381  | LOC729458    |  | 1.035E-09 |           |  |  | LOC729458    |  |      |
| V3SVHSHC_8273456  | FASTKD5      |  | 1.053E-09 |           |  |  | FASTKD5      |  |      |
| V3SVHSHC_10527950 | KLHL26       |  | 1.119E-09 |           |  |  | KLHL26       |  |      |
| V3SVHSHC_8400506  | C6orf183     |  | 1.120E-09 |           |  |  | C6orf183     |  |      |
| V3SVHSHC_10474787 | CASK         |  | 1.205E-09 |           |  |  | CASK         |  |      |
| V3SVHSHC_8131985  | SMARCD1      |  | 1.205E-09 |           |  |  | SMARCD1      |  |      |
| V3SVHSHC_6242339  | ZSCAN12      |  | 1.329E-09 |           |  |  | ZSCAN12      |  |      |
| V3SVHSHC_5327249  | C19orf68     |  | 1.333E-09 |           |  |  | C19orf68     |  |      |
| V3SVHSHC_7604579  | CAMK2N1      |  | 1.352E-09 |           |  |  | CAMK2N1      |  |      |
| V3SVHSHC_8996717  | C1orf194     |  | 1.380E-09 |           |  |  | C1orf194     |  |      |
| V3SVHSHC_7112747  | PPM1J        |  | 1.478E-09 |           |  |  | PPM1J        |  |      |
| V3SVHSHC_10686053 | LEMD3        |  | 1.539E-09 |           |  |  | LEMD3        |  |      |
| V3SVHSHC_10687241 | SLIT2        |  | 1.552E-09 |           |  |  | SLIT2        |  |      |
| V3SVHSHC_4917059  | IGFALS       |  | 1.553E-09 |           |  |  | IGFALS       |  |      |
| V3SVHSHC_9632495  | DYDC1        |  | 1.618E-09 |           |  |  | DYDC1        |  |      |
| V3SVHSHC_10011896 | RANBP17      |  | 1.643E-09 |           |  |  | RANBP17      |  |      |
| V3SVHSHC_7131656  | FAM189A2     |  | 1.652E-09 |           |  |  | FAM189A2     |  |      |
| V3SVHSHC_6182180  | Hm13         |  | 1.685E-09 |           |  |  | Hm13         |  |      |
| V3SVHSHC_9920783  | DEFB104A     |  | 1.730E-09 |           |  |  | DEFB104A     |  |      |
| V3SVHSHC_6629627  | TRPM2        |  | 1.739E-09 |           |  |  | TRPM2        |  |      |
| V3SVHSHC_8241941  | DGKK         |  | 1.882E-09 | 3.172E-04 |  |  | DGKK         |  | DGKK |
| V3SVHSHC_8130401  | FAM189B      |  | 1.890E-09 |           |  |  | FAM189B      |  |      |
| V3SVHSHC_8183663  | PTGES3L      |  | 1.896E-09 |           |  |  | PTGES3L      |  |      |
| V3SVHSHC_9131093  | SLC36A3      |  | 2.084E-09 |           |  |  | SLC36A3      |  |      |
| V3SVHSHC_6445883  | WDR45B       |  | 2.116E-09 |           |  |  | WDR45B       |  |      |
| V3SVHSHC_5357246  | BFSP1        |  | 2.123E-09 |           |  |  | BFSP1        |  |      |
| V3SVHSHC_4836242  | FAM166A      |  | 2.204E-09 |           |  |  | FAM166A      |  |      |
| V3SVHSHC_10564712 | LRRC37B      |  | 2.236E-09 |           |  |  | LRRC37B      |  |      |
| V3SVHSHC_7101461  | ZNF282       |  | 2.244E-09 |           |  |  | ZNF282       |  |      |
| V3SVHSHC_5131427  | CT83         |  | 2.343E-09 |           |  |  | CT83         |  |      |
| V3SVHSHC_8419811  | S100A14      |  | 2.364E-09 |           |  |  | S100A14      |  |      |
| V3SVHSHC_5110736  | TRIO         |  | 2.395E-09 |           |  |  | TRIO         |  |      |
| V3SVHSHC_6109151  | RESP18       |  | 2.400E-09 |           |  |  | RESP18       |  |      |
| V3SVHSHC_9562502  | VCY          |  | 2.442E-09 |           |  |  | VCY          |  |      |
| V3SVHSHC_6993815  | FRRS1L       |  | 2.596E-09 |           |  |  | FRRS1L       |  |      |
| V3SVHSHC_9731858  | TSN          |  | 2.785E-09 | 6.810E-20 |  |  | TSN          |  | TSN  |
| V3SVHSHC_7029719  | CLPTM1L      |  | 2.877E-09 |           |  |  | CLPTM1L      |  |      |
| V3SVHSHC_7344770  | HOXA7        |  | 2.939E-09 |           |  |  | HOXA7        |  |      |
| V3SVHSHC_8326586  | AIFM2        |  | 3.085E-09 | 2.093E-01 |  |  | AIFM2        |  |      |
| V3SVHSHC_9753407  | GAS7         |  | 3.254E-09 |           |  |  | GAS7         |  |      |
| V3SVHSHC_10014074 | GPR137B      |  | 3.292E-09 |           |  |  | GPR137B      |  |      |
| V3SVHSHC_8370080  | AGBL4        |  | 3.360E-09 |           |  |  | AGBL4        |  |      |
| V3SVHSHC_10751030 | GPR68        |  | 3.386E-09 |           |  |  | GPR68        |  |      |
| V3SVHSHC_9945368  | ALPI         |  | 3.411E-09 |           |  |  | ALPI         |  |      |
| V3SVHSHC_5489972  | LOC101060588 |  | 3.487E-09 |           |  |  | LOC101060588 |  |      |
| V3SVHSHC_7998302  | CNOT7        |  | 3.670E-09 |           |  |  | CNOT7        |  |      |

|                   |          |  |           |           |           |  |  |          |       |       |
|-------------------|----------|--|-----------|-----------|-----------|--|--|----------|-------|-------|
| V3SVHSHC_6968900  | ASB7     |  | 3.733E-09 |           |           |  |  | ASB7     |       |       |
| V3SVHSHC_7626821  | SPI1     |  | 4.285E-09 |           |           |  |  | SPI1     |       |       |
| V3SVHSHC_5107403  | BRD8     |  | 4.353E-09 |           |           |  |  | BRD8     |       |       |
| V3SVHSHC_10334900 | SDC3     |  | 4.416E-09 |           |           |  |  | SDC3     |       |       |
| V3SVHSHC_10279097 | OR10Z1   |  | 4.524E-09 |           |           |  |  | OR10Z1   |       |       |
| V3SVHSHC_6238940  | Zdbf2    |  | 4.862E-09 |           |           |  |  | Zdbf2    |       |       |
| V3SVHSHC_5305172  | OBSCN    |  | 4.965E-09 |           |           |  |  | OBSCN    |       |       |
| V3SVHSHC_7245275  | NFE2L1   |  | 5.039E-09 |           |           |  |  | NFE2L1   |       |       |
| V3SVHSHC_9629327  | TRIML1   |  | 5.107E-09 |           |           |  |  | TRIML1   |       |       |
| V3SVHSHC_8634641  | FAM46A   |  | 5.601E-09 |           |           |  |  | FAM46A   |       |       |
| V3SVHSHC_7686254  | PLK2     |  | 5.665E-09 |           |           |  |  | PLK2     |       |       |
| V3SVHSHC_6165812  | TCP11X1  |  | 5.853E-09 |           |           |  |  | TCP11X1  |       |       |
| V3SVHSHC_5851586  | POC5     |  | 5.924E-09 |           |           |  |  | POC5     |       |       |
| V3SVHSHC_7406480  | ACTRT1   |  | 6.208E-09 |           |           |  |  | ACTRT1   |       |       |
| V3SVHSHC_9241181  | VPS4A    |  | 6.464E-09 |           |           |  |  | VPS4A    |       |       |
| V3SVHSHC_7722653  | CLIP1    |  | 6.553E-09 |           | 2.745E-16 |  |  | CLIP1    |       | CLIP1 |
| V3SVHSHC_5207063  | HEATR3   |  | 6.554E-09 |           |           |  |  | HEATR3   |       |       |
| V3SVHSHC_10335527 | KRTAP2-3 |  | 6.606E-09 |           |           |  |  | KRTAP2-3 |       |       |
| V3SVHSHC_7235969  | ARFIP1   |  | 7.598E-09 |           |           |  |  | ARFIP1   |       |       |
| V3SVHSHC_7564748  | NUDT6    |  | 7.812E-09 |           |           |  |  | NUDT6    |       |       |
| V3SVHSHC_8760404  | MEAF6    |  | 7.898E-09 |           | 3.328E-08 |  |  | MEAF6    |       | MEAF6 |
| V3SVHSHC_7498649  | PJA1     |  | 8.405E-09 |           |           |  |  | PJA1     |       |       |
| V3SVHSHC_9698660  | ZNF200   |  | 8.480E-09 |           | 9.248E-03 |  |  | ZNF200   |       |       |
| V3SVHSHC_6111362  | SRRD     |  | 8.581E-09 |           |           |  |  | SRRD     |       |       |
| V3SVHSHC_10245437 | HPDL     |  | 8.888E-09 |           |           |  |  | HPDL     |       |       |
| V3SVHSHC_4859639  | BOLA2B   |  | 8.923E-09 |           |           |  |  | BOLA2B   |       |       |
| V3SVHSHC_4643588  | CNTF     |  | 9.113E-09 |           |           |  |  | CNTF     |       |       |
| V3SVHSHC_8178977  | SLC39A12 |  | 9.209E-09 |           |           |  |  | SLC39A12 |       |       |
| V3SVHSHC_5916134  | PCDH1    |  | 9.521E-09 |           |           |  |  | PCDH1    |       |       |
| V3SVHSHC_8499671  | PHKA1    |  | 9.585E-09 |           |           |  |  | PHKA1    |       |       |
| V3SVHSHC_10461851 | ZFP36    |  | 1.006E-08 |           |           |  |  | ZFP36    |       |       |
| V3SVHSHC_5452187  | FOXL1    |  | 1.055E-08 |           |           |  |  | FOXL1    |       |       |
| V3SVHSHC_4672397  | PNMA1    |  | 1.102E-08 | 1.289E-20 |           |  |  | PNMA1    | PNMA1 |       |
| V3SVHSHC_6654971  | UBA52    |  | 1.109E-08 |           |           |  |  | UBA52    |       |       |
| V3SVHSHC_8492015  | LGALS7   |  | 1.112E-08 |           |           |  |  | LGALS7   |       |       |
| V3SVHSHC_10291835 | EFCAB13  |  | 1.130E-08 |           |           |  |  | EFCAB13  |       |       |
| V3SVHSHC_6951311  | NPFF     |  | 1.165E-08 |           |           |  |  | NPFF     |       |       |
| V3SVHSHC_5583593  | FKBP14   |  | 1.198E-08 |           |           |  |  | FKBP14   |       |       |
| V3SVHSHC_10543328 | GJC2     |  | 1.211E-08 |           |           |  |  | GJC2     |       |       |
| V3SVHSHC_6500102  | PPP1R14D |  | 1.268E-08 |           |           |  |  | PPP1R14D |       |       |
| V3SVHSHC_7456112  | SLC7A13  |  | 1.284E-08 |           |           |  |  | SLC7A13  |       |       |
| V3SVHSHC_10245800 | SPATA5   |  | 1.295E-08 |           |           |  |  | SPATA5   |       |       |
| V3SVHSHC_9502607  | KLHL6    |  | 1.298E-08 |           |           |  |  | KLHL6    |       |       |
| V3SVHSHC_7528382  | MANSC1   |  | 1.326E-08 |           |           |  |  | MANSC1   |       |       |
| V3SVHSHC_5221979  | CNDP2    |  | 1.418E-08 |           |           |  |  | CNDP2    |       |       |
| V3SVHSHC_6576827  | WDR53    |  | 1.491E-08 | 4.845E-12 |           |  |  | WDR53    | WDR53 |       |
| V3SVHSHC_6285305  | IL17D    |  | 1.507E-08 |           |           |  |  | IL17D    |       |       |
| V3SVHSHC_8986883  | KCNRG    |  | 1.548E-08 |           |           |  |  | KCNRG    |       |       |
| V3SVHSHC_8816966  | EIF3F    |  | 1.580E-08 |           |           |  |  | EIF3F    |       |       |
| V3SVHSHC_7609430  | TUBGCP5  |  | 1.616E-08 |           |           |  |  | TUBGCP5  |       |       |
| V3SVHSHC_5506472  | ZNF732   |  | 1.620E-08 |           | 4.891E-01 |  |  | ZNF732   |       |       |
| V3SVHSHC_6130733  | WAC      |  | 1.649E-08 |           |           |  |  | WAC      |       |       |
| V3SVHSHC_5919302  | TBX19    |  | 1.741E-08 |           |           |  |  | TBX19    |       |       |
| V3SVHSHC_5810831  | PLA2G4E  |  | 1.800E-08 |           |           |  |  | PLA2G4E  |       |       |

|                   |           |  |           |           |           |  |           |      |         |
|-------------------|-----------|--|-----------|-----------|-----------|--|-----------|------|---------|
| V3SVHSHC_7881482  | TOR1B     |  | 1.854E-08 |           |           |  | TOR1B     |      |         |
| V3SVHSHC_8403410  | DUOXA2    |  | 1.905E-08 |           |           |  | DUOXA2    |      |         |
| V3SVHSHC_5562440  | KIAA1462  |  | 1.961E-08 |           |           |  | KIAA1462  |      |         |
| V3SVHSHC_9121391  | TLR2      |  | 2.003E-08 |           |           |  | TLR2      |      |         |
| V3SVHSHC_8338928  | FRAT2     |  | 2.005E-08 |           | 4.877E-01 |  | FRAT2     |      |         |
| V3SVHSHC_9511913  | Tlc39a    |  | 2.057E-08 |           |           |  | Tlc39a    |      |         |
| V3SVHSHC_7201154  | LOC645177 |  | 2.220E-08 |           |           |  | LOC645177 |      |         |
| V3SVHSHC_10734266 | SIKE1     |  | 2.227E-08 |           |           |  | SIKE1     |      |         |
| V3SVHSHC_9883163  | STOML1    |  | 2.247E-08 |           |           |  | STOML1    |      |         |
| V3SVHSHC_10175741 | ACE       |  | 2.329E-08 |           |           |  | ACE       |      |         |
| V3SVHSHC_7065590  | NANOS1    |  | 2.357E-08 |           |           |  | NANOS1    |      |         |
| V3SVHSHC_7659491  | SPDL1     |  | 2.370E-08 |           |           |  | SPDL1     |      |         |
| V3SVHSHC_10150727 | SGPP1     |  | 2.443E-08 |           |           |  | SGPP1     |      |         |
| V3SVHSHC_7899467  | PTGIS     |  | 2.498E-08 |           | 4.463E-23 |  | PTGIS     |      | PTGIS   |
| V3SVHSHC_4642598  | MCCD1     |  | 2.536E-08 |           |           |  | MCCD1     |      |         |
| V3SVHSHC_6211022  | RNF219    |  | 2.604E-08 |           |           |  | RNF219    |      |         |
| V3SVHSHC_7687475  | YBEY      |  | 2.746E-08 |           |           |  | YBEY      |      |         |
| V3SVHSHC_6261380  | PTPRZ1    |  | 2.803E-08 |           |           |  | PTPRZ1    |      |         |
| V3SVHSHC_9711959  | Tlc39a    |  | 2.834E-08 |           |           |  | Tlc39a    |      |         |
| V3SVHSHC_7071167  | NDUFA13   |  | 2.923E-08 |           |           |  | NDUFA13   |      |         |
| V3SVHSHC_4632302  | HOMER1    |  | 3.024E-08 |           |           |  | HOMER1    |      |         |
| V3SVHSHC_10046216 | MAP4K1    |  | 3.052E-08 |           |           |  | MAP4K1    |      |         |
| V3SVHSHC_8830793  | FAM217A   |  | 3.068E-08 |           | 1.959E-10 |  | FAM217A   |      | FAM217A |
| V3SVHSHC_8943983  | TSR3      |  | 3.102E-08 |           |           |  | TSR3      |      |         |
| V3SVHSHC_6837395  | NDUFA11   |  | 3.102E-08 |           |           |  | NDUFA11   |      |         |
| V3SVHSHC_7317512  | SKI       |  | 3.150E-08 |           |           |  | SKI       |      |         |
| V3SVHSHC_10556495 | NEUROG2   |  | 3.159E-08 |           |           |  | NEUROG2   |      |         |
| V3SVHSHC_7900721  | MYH10     |  | 3.231E-08 |           |           |  | MYH10     |      |         |
| V3SVHSHC_10820033 | DDA1      |  | 3.365E-08 |           |           |  | DDA1      |      |         |
| V3SVHSHC_9959162  | FBLN7     |  | 3.699E-08 |           |           |  | FBLN7     |      |         |
| V3SVHSHC_8352656  | ZNF606    |  | 3.807E-08 |           |           |  | ZNF606    |      |         |
| V3SVHSHC_8182640  | RPUSD4    |  | 3.861E-08 |           |           |  | RPUSD4    |      |         |
| V3SVHSHC_9242963  | HELLS     |  | 3.982E-08 |           |           |  | HELLS     |      |         |
| V3SVHSHC_9735158  | UNCX      |  | 4.083E-08 | 1.668E-07 |           |  | UNCX      | UNCX |         |
| V3SVHSHC_7681172  | WRB       |  | 4.154E-08 | 1.370E-09 |           |  | WRB       | WRB  |         |
| V3SVHSHC_10022588 | OPCML     |  | 4.550E-08 |           |           |  | OPCML     |      |         |
| V3SVHSHC_6370544  | TNIP1     |  | 4.924E-08 |           |           |  | TNIP1     |      |         |
| V3SVHSHC_5083445  | GPN2      |  | 5.089E-08 |           |           |  | GPN2      |      |         |
| V3SVHSHC_5920853  | SLC22A7   |  | 5.151E-08 |           |           |  | SLC22A7   |      |         |
| V3SVHSHC_6452912  | IKZF4     |  | 5.172E-08 | 6.119E-03 |           |  | IKZF4     |      |         |
| V3SVHSHC_9541052  | KATNAL2   |  | 5.372E-08 |           |           |  | KATNAL2   |      |         |
| V3SVHSHC_8488022  | CuI9      |  | 5.729E-08 |           |           |  | CuI9      |      |         |
| V3SVHSHC_7515710  | FLNC      |  | 5.843E-08 |           |           |  | FLNC      |      |         |
| V3SVHSHC_9360212  | C12orf49  |  | 5.916E-08 |           |           |  | C12orf49  |      |         |
| V3SVHSHC_5055857  | PTGR2     |  | 6.064E-08 |           |           |  | PTGR2     |      |         |
| V3SVHSHC_6042557  | SLC2A14   |  | 6.078E-08 |           |           |  | SLC2A14   |      |         |
| V3SVHSHC_10489505 | SLC25A51  |  | 6.136E-08 |           |           |  | SLC25A51  |      |         |
| V3SVHSHC_9938768  | RSPH10B2  |  | 6.147E-08 |           |           |  | RSPH10B2  |      |         |
| V3SVHSHC_6579698  | ST5       |  | 6.318E-08 |           |           |  | ST5       |      |         |
| V3SVHSHC_10279130 | ANKRD37   |  | 6.512E-08 |           |           |  | ANKRD37   |      |         |
| V3SVHSHC_8624411  | PHKG1     |  | 6.758E-08 |           |           |  | PHKG1     |      |         |
| V3SVHSHC_9880325  | CLCN6     |  | 7.457E-08 |           |           |  | CLCN6     |      |         |
| V3SVHSHC_6210593  | BUB1      |  | 7.636E-08 |           |           |  | BUB1      |      |         |

|                   |              |  |           |           |           |  |              |        |         |
|-------------------|--------------|--|-----------|-----------|-----------|--|--------------|--------|---------|
| V3SVHSHC_6898346  | ZNF705D      |  | 7.824E-08 |           |           |  | ZNF705D      |        |         |
| V3SVHSHC_10818878 | DEFB123      |  | 7.824E-08 |           |           |  | DEFB123      |        |         |
| V3SVHSHC_8864684  | CLEC9A       |  | 7.885E-08 |           |           |  | CLEC9A       |        |         |
| V3SVHSHC_5807795  | NKAPL        |  | 7.965E-08 |           |           |  | NKAPL        |        |         |
| V3SVHSHC_10139111 | LRP2         |  | 8.058E-08 |           |           |  | LRP2         |        |         |
| V3SVHSHC_9619889  | MPC1         |  | 8.229E-08 |           |           |  | MPC1         |        |         |
| V3SVHSHC_8360477  | OR4B1        |  | 8.325E-08 |           |           |  | OR4B1        |        |         |
| V3SVHSHC_6432782  | ESR2         |  | 8.462E-08 |           |           |  | ESR2         |        |         |
| V3SVHSHC_8847689  | HIF1AN       |  | 8.511E-08 | 4.278E-09 |           |  | HIF1AN       | HIF1AN |         |
| V3SVHSHC_5229041  | H2AFY        |  | 8.786E-08 |           |           |  | H2AFY        |        |         |
| V3SVHSHC_10023611 | BEST4        |  | 8.924E-08 |           |           |  | BEST4        |        |         |
| V3SVHSHC_10473467 | PTPN12       |  | 9.375E-08 |           |           |  | PTPN12       |        |         |
| V3SVHSHC_5649857  | RARA         |  | 9.601E-08 |           |           |  | RARA         |        |         |
| V3SVHSHC_6082487  | SLC29A1      |  | 9.624E-08 |           |           |  | SLC29A1      |        |         |
| V3SVHSHC_5653322  | OR1L6        |  | 9.922E-08 |           |           |  | OR1L6        |        |         |
| V3SVHSHC_7381070  | CUEDC2       |  | 1.011E-07 |           |           |  | CUEDC2       |        |         |
| V3SVHSHC_9897584  | CACNG8       |  | 1.065E-07 |           |           |  | CACNG8       |        |         |
| V3SVHSHC_7642265  | Mex3b        |  | 1.076E-07 |           |           |  | Mex3b        |        |         |
| V3SVHSHC_8046317  | COL25A1      |  | 1.123E-07 |           | 6.608E-06 |  | COL25A1      |        | COL25A1 |
| V3SVHSHC_7291112  | FGR          |  | 1.146E-07 |           |           |  | FGR          |        |         |
| V3SVHSHC_10599395 | SEPW1        |  | 1.197E-07 |           |           |  | SEPW1        |        |         |
| V3SVHSHC_7935107  | RAVER1       |  | 1.269E-07 |           |           |  | RAVER1       |        |         |
| V3SVHSHC_8028827  | TNFSF9       |  | 1.334E-07 | 2.757E-03 |           |  | TNFSF9       |        |         |
| V3SVHSHC_6780569  | PALM2-AKAP2  |  | 1.339E-07 |           |           |  | PALM2-AKAP2  |        |         |
| V3SVHSHC_7892339  | ISPD         |  | 1.368E-07 |           |           |  | ISPD         |        |         |
| V3SVHSHC_5217887  | PSAP         |  | 1.371E-07 |           |           |  | PSAP         |        |         |
| V3SVHSHC_7154690  | PBK          |  | 1.380E-07 |           |           |  | PBK          |        |         |
| V3SVHSHC_10021169 | SELPLG       |  | 1.431E-07 |           |           |  | SELPLG       |        |         |
| V3SVHSHC_7376714  | TEKT5        |  | 1.455E-07 |           | 4.243E-01 |  | TEKT5        |        |         |
| V3SVHSHC_6127763  | CLN6         |  | 1.576E-07 |           |           |  | CLN6         |        |         |
| V3SVHSHC_10689320 | PNOC         |  | 1.607E-07 |           |           |  | PNOC         |        |         |
| V3SVHSHC_8420603  | ASPA         |  | 1.614E-07 |           |           |  | ASPA         |        |         |
| V3SVHSHC_6559997  | MRPL36       |  | 1.639E-07 |           |           |  | MRPL36       |        |         |
| V3SVHSHC_6584516  | MUC13        |  | 1.774E-07 |           |           |  | MUC13        |        |         |
| V3SVHSHC_8737865  | FBXW9        |  | 1.779E-07 |           |           |  | FBXW9        |        |         |
| V3SVHSHC_6197525  | ZNF488       |  | 1.784E-07 | 8.688E-05 |           |  | ZNF488       | ZNF488 |         |
| V3SVHSHC_7376912  | TTC17        |  | 1.806E-07 |           |           |  | TTC17        |        |         |
| V3SVHSHC_8911676  | TARSL2       |  | 1.832E-07 |           | 2.168E-21 |  | TARSL2       |        | TARSL2  |
| V3SVHSHC_5499410  | TTLL11       |  | 1.856E-07 |           |           |  | TTLL11       |        |         |
| V3SVHSHC_8086940  | GDI2         |  | 2.048E-07 |           |           |  | GDI2         |        |         |
| V3SVHSHC_7460435  | CYP2C9       |  | 2.085E-07 |           |           |  | CYP2C9       |        |         |
| V3SVHSHC_7963289  | RUNX1T1      |  | 2.125E-07 |           |           |  | RUNX1T1      |        |         |
| V3SVHSHC_7620518  | GLIPR1L1     |  | 2.152E-07 |           |           |  | GLIPR1L1     |        |         |
| V3SVHSHC_8946392  | NDUFV2       |  | 2.157E-07 |           |           |  | NDUFV2       |        |         |
| V3SVHSHC_10529072 | ZNF727P      |  | 2.166E-07 |           |           |  | ZNF727P      |        |         |
| V3SVHSHC_8549930  | LOC101930592 |  | 2.268E-07 |           |           |  | LOC101930592 |        |         |
| V3SVHSHC_9721496  | KIAA0408     |  | 2.404E-07 |           |           |  | KIAA0408     |        |         |
| V3SVHSHC_7468586  | CEP57L1      |  | 2.481E-07 |           |           |  | CEP57L1      |        |         |
| V3SVHSHC_5857229  | BTG3         |  | 2.535E-07 |           |           |  | BTG3         |        |         |
| V3SVHSHC_8782547  | C1orf106     |  | 2.599E-07 |           |           |  | C1orf106     |        |         |
| V3SVHSHC_5964083  | HNRNPH1      |  | 2.636E-07 |           |           |  | HNRNPH1      |        |         |
| V3SVHSHC_7563263  | PCDH1        |  | 2.740E-07 |           | 1.283E-09 |  | PCDH1        |        | PCDH1   |
| V3SVHSHC_10063838 | SCN7A        |  | 2.776E-07 |           |           |  | SCN7A        |        |         |

|                   |              |  |           |           |  |  |              |        |  |
|-------------------|--------------|--|-----------|-----------|--|--|--------------|--------|--|
| V3SVHSHC_6619793  | PRDM15       |  | 2.885E-07 |           |  |  | PRDM15       |        |  |
| V3SVHSHC_10009685 | SDHC         |  | 3.092E-07 |           |  |  | SDHC         |        |  |
| V3SVHSHC_8393312  | CYP2D6       |  | 3.210E-07 |           |  |  | CYP2D6       |        |  |
| V3SVHSHC_9399614  | PITPNB       |  | 3.243E-07 |           |  |  | PITPNB       |        |  |
| V3SVHSHC_8090933  | TCEAL1       |  | 3.415E-07 |           |  |  | TCEAL1       |        |  |
| V3SVHSHC_7810004  | FBXL5        |  | 3.492E-07 |           |  |  | FBXL5        |        |  |
| V3SVHSHC_8500793  | ZNF80        |  | 3.634E-07 |           |  |  | ZNF80        |        |  |
| V3SVHSHC_6101330  | TRIM46       |  | 3.679E-07 |           |  |  | TRIM46       |        |  |
| V3SVHSHC_8959031  | GOSR1        |  | 3.773E-07 | 1.345E-03 |  |  | GOSR1        |        |  |
| V3SVHSHC_6999161  | MAPK8IP2     |  | 4.313E-07 |           |  |  | MAPK8IP2     |        |  |
| V3SVHSHC_7211417  | F2RL1        |  | 4.445E-07 |           |  |  | F2RL1        |        |  |
| V3SVHSHC_5348369  | AGXT         |  | 4.544E-07 |           |  |  | AGXT         |        |  |
| V3SVHSHC_10038362 | TET2         |  | 4.578E-07 |           |  |  | TET2         |        |  |
| V3SVHSHC_9443273  | UBASH3A      |  | 4.692E-07 |           |  |  | UBASH3A      |        |  |
| V3SVHSHC_8310350  | ARHGAP9      |  | 4.849E-07 |           |  |  | ARHGAP9      |        |  |
| V3SVHSHC_5706716  | TRIM67       |  | 5.367E-07 |           |  |  | TRIM67       |        |  |
| V3SVHSHC_9014966  | MAP1A        |  | 5.654E-07 |           |  |  | MAP1A        |        |  |
| V3SVHSHC_7566167  | VPS26A       |  | 5.679E-07 |           |  |  | VPS26A       |        |  |
| V3SVHSHC_9856136  | CT47A8       |  | 5.759E-07 | 2.257E-29 |  |  | CT47A8       | CT47A8 |  |
| V3SVHSHC_5880956  | ZNF408       |  | 5.959E-07 |           |  |  | ZNF408       |        |  |
| V3SVHSHC_9064598  | METTL9       |  | 6.190E-07 |           |  |  | METTL9       |        |  |
| V3SVHSHC_7466375  | PPIAL4D      |  | 6.288E-07 |           |  |  | PPIAL4D      |        |  |
| V3SVHSHC_9692159  | RBP1         |  | 6.401E-07 |           |  |  | RBP1         |        |  |
| V3SVHSHC_4859738  | KCNS2        |  | 6.580E-07 |           |  |  | KCNS2        |        |  |
| V3SVHSHC_5511356  | CHD9         |  | 6.790E-07 |           |  |  | CHD9         |        |  |
| V3SVHSHC_6183533  | AURKAIP1     |  | 6.823E-07 |           |  |  | AURKAIP1     |        |  |
| V3SVHSHC_8206961  | ABCB6        |  | 7.184E-07 |           |  |  | ABCB6        |        |  |
| V3SVHSHC_10486865 | IRS4         |  | 7.245E-07 |           |  |  | IRS4         |        |  |
| V3SVHSHC_7372292  | MAFF         |  | 7.257E-07 |           |  |  | MAFF         |        |  |
| V3SVHSHC_5534489  | MMS19        |  | 7.269E-07 |           |  |  | MMS19        |        |  |
| V3SVHSHC_4703945  | TOP2A        |  | 7.506E-07 |           |  |  | TOP2A        |        |  |
| V3SVHSHC_7980581  | ASIP         |  | 7.539E-07 |           |  |  | ASIP         |        |  |
| V3SVHSHC_6898907  | SH3BGRL2     |  | 7.568E-07 |           |  |  | SH3BGRL2     |        |  |
| V3SVHSHC_6073247  | PRSS45       |  | 8.701E-07 |           |  |  | PRSS45       |        |  |
| V3SVHSHC_10832342 | C1orf194     |  | 8.992E-07 |           |  |  | C1orf194     |        |  |
| V3SVHSHC_5832776  | MLST8        |  | 9.075E-07 |           |  |  | MLST8        |        |  |
| V3SVHSHC_9263159  | ADRBK2       |  | 9.095E-07 |           |  |  | ADRBK2       |        |  |
| V3SVHSHC_7830497  | ZNF302       |  | 9.189E-07 |           |  |  | ZNF302       |        |  |
| V3SVHSHC_4889207  | Fam150a      |  | 9.543E-07 |           |  |  | Fam150a      |        |  |
| V3SVHSHC_10249364 | NT5C1A       |  | 9.944E-07 |           |  |  | NT5C1A       |        |  |
| V3SVHSHC_7756379  | NCAPG        |  | 1.031E-06 |           |  |  | NCAPG        |        |  |
| V3SVHSHC_6113837  | DAPK1        |  | 1.074E-06 |           |  |  | DAPK1        |        |  |
| V3SVHSHC_6892010  | LOC101930553 |  | 1.163E-06 |           |  |  | LOC101930553 |        |  |
| V3SVHSHC_6952565  | MTX2         |  | 1.171E-06 | 2.274E-08 |  |  | MTX2         | MTX2   |  |
| V3SVHSHC_6082817  | PDXDC1       |  | 1.230E-06 |           |  |  | PDXDC1       |        |  |
| V3SVHSHC_5021801  | ZNF727P      |  | 1.236E-06 |           |  |  | ZNF727P      |        |  |
| V3SVHSHC_7051400  | RNF180       |  | 1.340E-06 |           |  |  | RNF180       |        |  |
| V3SVHSHC_4910426  | HIST2H2BE    |  | 1.356E-06 |           |  |  | HIST2H2BE    |        |  |
| V3SVHSHC_10115582 | KRT71        |  | 1.390E-06 |           |  |  | KRT71        |        |  |
| V3SVHSHC_10522637 | TARSL2       |  | 1.406E-06 |           |  |  | TARSL2       |        |  |
| V3SVHSHC_8604776  | MAN2B2       |  | 1.449E-06 |           |  |  | MAN2B2       |        |  |
| V3SVHSHC_9164258  | INF2         |  | 1.453E-06 |           |  |  | INF2         |        |  |

|                   |              |  |           |           |  |  |  |              |      |  |
|-------------------|--------------|--|-----------|-----------|--|--|--|--------------|------|--|
| V3SVHSHC_7672427  | FGG          |  | 1.538E-06 |           |  |  |  | FGG          |      |  |
| V3SVHSHC_9891908  | ARRDC1       |  | 1.594E-06 |           |  |  |  | ARRDC1       |      |  |
| V3SVHSHC_6392555  | Aknad1       |  | 1.692E-06 |           |  |  |  | Aknad1       |      |  |
| V3SVHSHC_8222735  | FCRL6        |  | 1.792E-06 |           |  |  |  | FCRL6        |      |  |
| V3SVHSHC_4846934  | SLC4A7       |  | 1.819E-06 |           |  |  |  | SLC4A7       |      |  |
| V3SVHSHC_10628666 | TM2D2        |  | 1.848E-06 |           |  |  |  | TM2D2        |      |  |
| V3SVHSHC_7041929  | STX10        |  | 1.872E-06 |           |  |  |  | STX10        |      |  |
| V3SVHSHC_5119052  | CCDC17       |  | 1.908E-06 |           |  |  |  | CCDC17       |      |  |
| V3SVHSHC_7068494  | C18ORF25     |  | 2.036E-06 |           |  |  |  | C18ORF25     |      |  |
| V3SVHSHC_9762317  | ZAR1         |  | 2.106E-06 |           |  |  |  | ZAR1         |      |  |
| V3SVHSHC_8329985  | EML3         |  | 2.158E-06 |           |  |  |  | EML3         |      |  |
| V3SVHSHC_9609296  | EQTN         |  | 2.178E-06 |           |  |  |  | EQTN         |      |  |
| V3SVHSHC_6738362  | CACNA2D1     |  | 2.265E-06 |           |  |  |  | CACNA2D1     |      |  |
| V3SVHSHC_5752223  | BRSK1        |  | 2.280E-06 |           |  |  |  | BRSK1        |      |  |
| V3SVHSHC_6896003  | MSLN         |  | 2.455E-06 |           |  |  |  | MSLN         |      |  |
| V3SVHSHC_8043677  | LACTB2       |  | 2.514E-06 |           |  |  |  | LACTB2       |      |  |
| V3SVHSHC_7987115  | HCFC2        |  | 2.576E-06 |           |  |  |  | HCFC2        |      |  |
| V3SVHSHC_6943886  | DVL2         |  | 2.810E-06 | 1.529E-04 |  |  |  | DVL2         | DVL2 |  |
| V3SVHSHC_9548246  | TNFRSF11B    |  | 2.987E-06 |           |  |  |  | TNFRSF11B    |      |  |
| V3SVHSHC_7802876  | RHOC         |  | 3.005E-06 |           |  |  |  | RHOC         |      |  |
| V3SVHSHC_8083970  | SEC24A       |  | 3.310E-06 |           |  |  |  | SEC24A       |      |  |
| V3SVHSHC_8658005  | ZNF814       |  | 3.324E-06 |           |  |  |  | ZNF814       |      |  |
| V3SVHSHC_6288737  | ANP32A       |  | 3.325E-06 |           |  |  |  | ANP32A       |      |  |
| V3SVHSHC_5253461  | GTPBP6       |  | 3.435E-06 |           |  |  |  | GTPBP6       |      |  |
| V3SVHSHC_9482213  | C4orf33      |  | 3.487E-06 |           |  |  |  | C4orf33      |      |  |
| V3SVHSHC_9645992  | CSNK1G3      |  | 3.627E-06 |           |  |  |  | CSNK1G3      |      |  |
| V3SVHSHC_9936920  | GPX8         |  | 3.696E-06 |           |  |  |  | GPX8         |      |  |
| V3SVHSHC_7506338  | CASP9        |  | 3.986E-06 |           |  |  |  | CASP9        |      |  |
| V3SVHSHC_7949495  | OR2Z1        |  | 4.016E-06 |           |  |  |  | OR2Z1        |      |  |
| V3SVHSHC_5865677  | Ntpr         |  | 4.079E-06 |           |  |  |  | Ntpr         |      |  |
| V3SVHSHC_5699225  | USP41        |  | 4.762E-06 | 1.695E-01 |  |  |  | USP41        |      |  |
| V3SVHSHC_10240685 | FGFBP1       |  | 4.869E-06 |           |  |  |  | FGFBP1       |      |  |
| V3SVHSHC_8453339  | NPAS2        |  | 4.886E-06 |           |  |  |  | NPAS2        |      |  |
| V3SVHSHC_8486933  | SCO1         |  | 5.008E-06 |           |  |  |  | SCO1         |      |  |
| V3SVHSHC_10324175 | CEMIP        |  | 5.095E-06 |           |  |  |  | CEMIP        |      |  |
| V3SVHSHC_10155050 | MTRNR2L10    |  | 5.115E-06 |           |  |  |  | MTRNR2L10    |      |  |
| V3SVHSHC_10079150 | BRD2         |  | 5.217E-06 |           |  |  |  | BRD2         |      |  |
| V3SVHSHC_9581510  | TOM1L2       |  | 5.260E-06 |           |  |  |  | TOM1L2       |      |  |
| V3SVHSHC_6646424  | OSER1        |  | 5.279E-06 |           |  |  |  | OSER1        |      |  |
| V3SVHSHC_6446411  | OR13G1       |  | 5.317E-06 |           |  |  |  | OR13G1       |      |  |
| V3SVHSHC_7498352  | CXCL9        |  | 5.505E-06 |           |  |  |  | CXCL9        |      |  |
| V3SVHSHC_9106541  | GPR182       |  | 5.588E-06 |           |  |  |  | GPR182       |      |  |
| V3SVHSHC_8201747  | NUTM2A       |  | 5.663E-06 |           |  |  |  | NUTM2A       |      |  |
| V3SVHSHC_9443009  | CTIF         |  | 6.236E-06 |           |  |  |  | CTIF         |      |  |
| V3SVHSHC_5213498  | LRRC52       |  | 6.298E-06 |           |  |  |  | LRRC52       |      |  |
| V3SVHSHC_9244481  | PLCB2        |  | 6.603E-06 |           |  |  |  | PLCB2        |      |  |
| V3SVHSHC_8821289  | PPP2R2A      |  | 7.661E-06 |           |  |  |  | PPP2R2A      |      |  |
| V3SVHSHC_9349619  | TYROBP       |  | 8.066E-06 |           |  |  |  | TYROBP       |      |  |
| V3SVHSHC_6557984  | KRT25        |  | 8.125E-06 |           |  |  |  | KRT25        |      |  |
| V3SVHSHC_7903394  | RANBP1       |  | 8.155E-06 |           |  |  |  | RANBP1       |      |  |
| V3SVHSHC_9204287  | LOC101929264 |  | 8.209E-06 |           |  |  |  | LOC101929264 |      |  |

|                   |              |  |              |           |           |  |  |              |          |         |
|-------------------|--------------|--|--------------|-----------|-----------|--|--|--------------|----------|---------|
| V3SVHSHC_6325202  | GAPT         |  | 8.643E-06    |           |           |  |  | GAPT         |          |         |
| V3SVHSHC_9784262  | ALDH3A1      |  | 8.708E-06    |           |           |  |  | ALDH3A1      |          |         |
| V3SVHSHC_8191319  | AGAP5        |  | 8.788E-06    |           |           |  |  | AGAP5        |          |         |
| V3SVHSHC_5466014  | RNF39        |  | 9.483E-06    |           |           |  |  | RNF39        |          |         |
| V3SVHSHC_5048168  | SLC6A8       |  | 9.816960E-06 |           |           |  |  | SLC6A8       |          |         |
| V3SVHSHC_8912468  | KRTAP4-2     |  | 1.040E-05    |           |           |  |  | KRTAP4-2     |          |         |
| V3SVHSHC_9108884  | BEX5         |  | 1.055E-05    |           |           |  |  | BEX5         |          |         |
| V3SVHSHC_9665858  | OPN1LW       |  | 1.086E-05    |           |           |  |  | OPN1LW       |          |         |
| V3SVHSHC_9074300  | URI1         |  | 1.099E-05    |           |           |  |  | URI1         |          |         |
| V3SVHSHC_9091394  | UQCRC2       |  | 1.118E-05    |           |           |  |  | UQCRC2       |          |         |
| V3SVHSHC_9683645  | SAC3D1       |  | 1.164E-05    |           |           |  |  | SAC3D1       |          |         |
| V3SVHSHC_6419318  | SMPDL3A      |  | 1.259E-05    |           | 2.211E-13 |  |  | SMPDL3A      |          | SMPDL3A |
| V3SVHSHC_7408922  | HSPG2        |  | 1.341E-05    |           |           |  |  | HSPG2        |          |         |
| V3SVHSHC_7157990  | CDC42EP3     |  | 1.350E-05    |           |           |  |  | CDC42EP3     |          |         |
| V3SVHSHC_5533796  | FBXO21       |  | 1.376E-05    |           |           |  |  | FBXO21       |          |         |
| V3SVHSHC_5263691  | SIDT1        |  | 1.408E-05    |           |           |  |  | SIDT1        |          |         |
| V3SVHSHC_6594152  | SMARCD2      |  | 1.460E-05    |           |           |  |  | SMARCD2      |          |         |
| V3SVHSHC_6692558  | CDC34        |  | 1.547E-05    |           |           |  |  | CDC34        |          |         |
| V3SVHSHC_9158615  | S100A11      |  | 1.787E-05    |           |           |  |  | S100A11      |          |         |
| V3SVHSHC_7465088  | MAK          |  | 1.799E-05    |           |           |  |  | MAK          |          |         |
| V3SVHSHC_5059454  | RAD54L       |  | 1.925E-05    |           |           |  |  | RAD54L       |          |         |
| V3SVHSHC_7628042  | PRR15        |  | 1.939E-05    |           |           |  |  | PRR15        |          |         |
| V3SVHSHC_5669624  | HAPLN1       |  | 2.031E-05    |           |           |  |  | HAPLN1       |          |         |
| V3SVHSHC_5625371  | TAS2R16      |  | 2.210E-05    |           |           |  |  | TAS2R16      |          |         |
| V3SVHSHC_4799810  | DNAJB4       |  | 2.417E-05    |           |           |  |  | DNAJB4       |          |         |
| V3SVHSHC_6084896  | OR11L1       |  | 2.571E-05    |           |           |  |  | OR11L1       |          |         |
| V3SVHSHC_5296394  | OR4D11       |  | 2.596E-05    |           |           |  |  | OR4D11       |          |         |
| V3SVHSHC_7763540  | SNUPN        |  | 2.602E-05    |           |           |  |  | SNUPN        |          |         |
| V3SVHSHC_7374371  | DOCK1        |  | 2.634E-05    |           |           |  |  | DOCK1        |          |         |
| V3SVHSHC_10112678 | KIAA1147     |  | 2.635E-05    |           |           |  |  | KIAA1147     |          |         |
| V3SVHSHC_10403309 | SLPI         |  | 2.650E-05    |           |           |  |  | SLPI         |          |         |
| V3SVHSHC_10212998 | RAB23        |  | 2.739E-05    |           |           |  |  | RAB23        |          |         |
| V3SVHSHC_6505250  | TMEM255A     |  | 2.817E-05    |           |           |  |  | TMEM255A     |          |         |
| V3SVHSHC_7656290  | SLC17A1      |  | 2.852E-05    |           |           |  |  | SLC17A1      |          |         |
| V3SVHSHC_6497165  | SNTG2        |  | 2.989E-05    |           |           |  |  | SNTG2        |          |         |
| V3SVHSHC_7200065  | CLEC2L       |  | 3.251E-05    |           |           |  |  | CLEC2L       |          |         |
| V3SVHSHC_8263523  | B4GALNT4     |  | 3.305E-05    | 1.207E-27 |           |  |  | B4GALNT4     | B4GALNT4 |         |
| V3SVHSHC_8515742  | INPP4A       |  | 3.314E-05    |           |           |  |  | INPP4A       |          |         |
| V3SVHSHC_6566399  | DHCR24       |  | 3.380E-05    |           |           |  |  | DHCR24       |          |         |
| V3SVHSHC_8795417  | TMEM177      |  | 3.582E-05    |           |           |  |  | TMEM177      |          |         |
| V3SVHSHC_6897389  | LOC100130705 |  | 3.609E-05    |           |           |  |  | LOC100130705 |          |         |
| V3SVHSHC_7949231  | CREBZF       |  | 3.807E-05    |           |           |  |  | CREBZF       |          |         |
| V3SVHSHC_5426051  | CSTF2T       |  | 3.976E-05    |           |           |  |  | CSTF2T       |          |         |
| V3SVHSHC_8418161  | PXK          |  | 4.268E-05    |           |           |  |  | PXK          |          |         |
| V3SVHSHC_7730243  | MCTP1        |  | 4.393E-05    |           |           |  |  | MCTP1        |          |         |
| V3SVHSHC_7426643  | ACVR1B       |  | 4.563E-05    |           |           |  |  | ACVR1B       |          |         |
| V3SVHSHC_6701336  | COL13A1      |  | 4.603E-05    |           |           |  |  | COL13A1      |          |         |
| V3SVHSHC_10031894 | PCDHGA1      |  | 4.620E-05    |           |           |  |  | PCDHGA1      |          |         |
| V3SVHSHC_10191053 | COX7A2L      |  | 4.658E-05    |           |           |  |  | COX7A2L      |          |         |
| V3SVHSHC_9646190  | IL22         |  | 4.963E-05    |           |           |  |  | IL22         |          |         |
| V3SVHSHC_4830698  | ST14         |  | 5.034E-05    |           |           |  |  | ST14         |          |         |

|                   |              |  |           |           |  |  |              |  |  |
|-------------------|--------------|--|-----------|-----------|--|--|--------------|--|--|
| V3SVHSHC_5061698  | HBG1         |  | 5.063E-05 |           |  |  | HBG1         |  |  |
| V3SVHSHC_9583754  | TSPY3        |  | 5.264E-05 |           |  |  | TSPY3        |  |  |
| V3SVHSHC_10789376 | RNMTL1       |  | 5.783E-05 |           |  |  | RNMTL1       |  |  |
| V3SVHSHC_9374600  | CSTF1        |  | 6.713E-05 |           |  |  | CSTF1        |  |  |
| V3SVHSHC_8725127  | TIMP3        |  | 6.801E-05 |           |  |  | TIMP3        |  |  |
| V3SVHSHC_10478648 | PSMA5        |  | 6.802E-05 |           |  |  | PSMA5        |  |  |
| V3SVHSHC_10262564 | SMC3         |  | 6.999E-05 |           |  |  | SMC3         |  |  |
| V3SVHSHC_9643715  | SPTLC3       |  | 7.399E-05 |           |  |  | SPTLC3       |  |  |
| V3SVHSHC_6653684  | PTRHD1       |  | 8.163E-05 |           |  |  | PTRHD1       |  |  |
| V3SVHSHC_9691235  | CAPZB        |  | 9.680E-05 |           |  |  | CAPZB        |  |  |
| V3SVHSHC_10785680 | LPL          |  | 1.011E-04 |           |  |  | LPL          |  |  |
| V3SVHSHC_9274511  | ZNF282       |  | 1.016E-04 |           |  |  | ZNF282       |  |  |
| V3SVHSHC_8015396  | ENDOG        |  | 1.020E-04 |           |  |  | ENDOG        |  |  |
| V3SVHSHC_6521288  | ZNF880       |  | 1.083E-04 |           |  |  | ZNF880       |  |  |
| V3SVHSHC_7494689  | RANBP6       |  | 1.089E-04 |           |  |  | RANBP6       |  |  |
| V3SVHSHC_9435353  | MRE11A       |  | 1.105E-04 |           |  |  | MRE11A       |  |  |
| V3SVHSHC_5206370  | Ms4a15       |  | 1.106E-04 |           |  |  | Ms4a15       |  |  |
| V3SVHSHC_6557687  | GNLY         |  | 1.156E-04 |           |  |  | GNLY         |  |  |
| V3SVHSHC_4818521  | LOC101060588 |  | 1.204E-04 |           |  |  | LOC101060588 |  |  |
| V3SVHSHC_7926461  | PREPL        |  | 1.227E-04 |           |  |  | PREPL        |  |  |
| V3SVHSHC_10477361 | C1orf109     |  | 1.274E-04 |           |  |  | C1orf109     |  |  |
| V3SVHSHC_8885936  | KLHL4        |  | 1.286E-04 |           |  |  | KLHL4        |  |  |
| V3SVHSHC_10085420 | GCHFR        |  | 1.293E-04 |           |  |  | GCHFR        |  |  |
| V3SVHSHC_9834521  | C5orf52      |  | 1.297E-04 |           |  |  | C5orf52      |  |  |
| V3SVHSHC_5537096  | KLHDC7A      |  | 1.327E-04 |           |  |  | KLHDC7A      |  |  |
| V3SVHSHC_7072619  | UBQLN4       |  | 1.365E-04 |           |  |  | UBQLN4       |  |  |
| V3SVHSHC_4861388  | GBE1         |  | 1.376E-04 |           |  |  | GBE1         |  |  |
| V3SVHSHC_8507888  | TDGF1        |  | 1.439E-04 |           |  |  | TDGF1        |  |  |
| V3SVHSHC_10375061 | TAC4         |  | 1.545E-04 |           |  |  | TAC4         |  |  |
| V3SVHSHC_9212306  | KIF27        |  | 1.585E-04 |           |  |  | KIF27        |  |  |
| V3SVHSHC_9585833  | CRYGA        |  | 1.653E-04 |           |  |  | CRYGA        |  |  |
| V3SVHSHC_7501553  | CDHR1        |  | 1.656E-04 |           |  |  | CDHR1        |  |  |
| V3SVHSHC_10578803 | NOM1         |  | 1.710E-04 |           |  |  | NOM1         |  |  |
| V3SVHSHC_10248968 | SUMO4        |  | 1.730E-04 |           |  |  | SUMO4        |  |  |
| V3SVHSHC_6064667  | SPX          |  | 1.746E-04 |           |  |  | SPX          |  |  |
| V3SVHSHC_7428194  | FKTN         |  | 1.868E-04 |           |  |  | FKTN         |  |  |
| V3SVHSHC_8559863  | RABGGTB      |  | 1.909E-04 |           |  |  | RABGGTB      |  |  |
| V3SVHSHC_4996391  | KLHL29       |  | 1.928E-04 |           |  |  | KLHL29       |  |  |
| V3SVHSHC_9093770  | ZNF324       |  | 1.976E-04 |           |  |  | ZNF324       |  |  |
| V3SVHSHC_6268706  | ZSCAN4       |  | 2.010E-04 |           |  |  | ZSCAN4       |  |  |
| V3SVHSHC_9350675  | KCNB2        |  | 2.041E-04 |           |  |  | KCNB2        |  |  |
| V3SVHSHC_9476900  | TVP23C       |  | 2.162E-04 |           |  |  | TVP23C       |  |  |
| V3SVHSHC_6321242  | ZNF688       |  | 2.898E-04 | 2.000E-02 |  |  | ZNF688       |  |  |
| V3SVHSHC_6864884  | TMPRSS2      |  | 3.029E-04 |           |  |  | TMPRSS2      |  |  |
| V3SVHSHC_6514457  | MESP2        |  | 3.059E-04 |           |  |  | MESP2        |  |  |
| V3SVHSHC_6774629  | MX2          |  | 3.071E-04 |           |  |  | MX2          |  |  |
| V3SVHSHC_8029124  | CLEC2A       |  | 3.083E-04 |           |  |  | CLEC2A       |  |  |
| V3SVHSHC_4640288  | BAG5         |  | 3.170E-04 |           |  |  | BAG5         |  |  |
| V3SVHSHC_10854320 | HERPUD1      |  | 3.321E-04 |           |  |  | HERPUD1      |  |  |
| V3SVHSHC_9197390  | REST         |  | 3.383E-04 |           |  |  | REST         |  |  |
| V3SVHSHC_8114495  | ZNRF2        |  | 3.509E-04 |           |  |  | ZNRF2        |  |  |
| V3SVHSHC_6976886  | CIB3         |  | 3.756E-04 |           |  |  | CIB3         |  |  |
| V3SVHSHC_6239006  | ERICH2       |  | 3.794E-04 |           |  |  | ERICH2       |  |  |



|                   |              |  |           |  |           |  |  |              |  |         |
|-------------------|--------------|--|-----------|--|-----------|--|--|--------------|--|---------|
| V3SVHSHC_7006553  | LOC100505478 |  | 4.626E-04 |  |           |  |  | LOC100505478 |  |         |
| V3SVHSHC_8131622  | RAB3IL1      |  | 4.800E-04 |  |           |  |  | RAB3IL1      |  |         |
| V3SVHSHC_9051365  | KIAA1432     |  | 4.965E-04 |  |           |  |  | KIAA1432     |  |         |
| V3SVHSHC_6209339  | ODF3L1       |  | 4.998E-04 |  |           |  |  | ODF3L1       |  |         |
| V3SVHSHC_10428620 | TNFAIP6      |  | 5.165E-04 |  |           |  |  | TNFAIP6      |  |         |
| V3SVHSHC_6710807  | VWA2         |  | 5.248E-04 |  |           |  |  | VWA2         |  |         |
| V3SVHSHC_7607780  | RAPSN        |  | 5.263E-04 |  |           |  |  | RAPSN        |  |         |
| V3SVHSHC_9747929  | PNLDC1       |  | 5.685E-04 |  |           |  |  | PNLDC1       |  |         |
| V3SVHSHC_6091496  | MPHOSPH8     |  | 6.031E-04 |  |           |  |  | MPHOSP<br>H8 |  |         |
| V3SVHSHC_4974281  | ALDH3B1      |  | 6.061E-04 |  |           |  |  | ALDH3B1      |  |         |
| V3SVHSHC_7193036  | KIF11        |  | 6.163E-04 |  |           |  |  | KIF11        |  |         |
| V3SVHSHC_6558116  | MLPH         |  | 6.567E-04 |  |           |  |  | MLPH         |  |         |
| V3SVHSHC_5021141  | BAIAP2       |  | 6.708E-04 |  |           |  |  | BAIAP2       |  |         |
| V3SVHSHC_10140662 | OR8K3        |  | 7.004E-04 |  |           |  |  | OR8K3        |  |         |
| V3SVHSHC_10307411 | ROBO3        |  | 7.012E-04 |  |           |  |  | ROBO3        |  |         |
| V3SVHSHC_8684108  | LEKR1        |  | 7.091E-04 |  |           |  |  | LEKR1        |  |         |
| V3SVHSHC_7015859  | PCDHGA1      |  | 7.176E-04 |  |           |  |  | PCDHGA1      |  |         |
| V3SVHSHC_9838283  | Ptpmt1       |  | 7.477E-04 |  |           |  |  | Ptpmt1       |  |         |
| V3SVHSHC_4866932  | KCNE4        |  | 7.619E-04 |  |           |  |  | KCNE4        |  |         |
| V3SVHSHC_6640517  | CHRN2        |  | 7.839E-04 |  |           |  |  |              |  |         |
| V3SVHSHC_8429513  | GPR64        |  | 8.642E-04 |  |           |  |  |              |  |         |
| V3SVHSHC_7930157  | KLHL20       |  | 9.416E-04 |  |           |  |  |              |  |         |
| V3SVHSHC_8178152  | TCEA3        |  | 9.647E-04 |  |           |  |  |              |  |         |
| V3SVHSHC_5200529  | ATP2A2       |  | 9.989E-04 |  |           |  |  |              |  |         |
| V3SVHSHC_10125680 | TSPAN11      |  | 1.108E-03 |  |           |  |  |              |  |         |
| V3SVHSHC_9235142  | ZNF678       |  | 1.151E-03 |  |           |  |  |              |  |         |
| V3SVHSHC_6680150  | HSF2         |  | 1.197E-03 |  |           |  |  |              |  |         |
| V3SVHSHC_8084696  | RBPM5        |  | 1.264E-03 |  |           |  |  |              |  |         |
| V3SVHSHC_7122977  | CNGA3        |  | 1.273E-03 |  |           |  |  |              |  |         |
| V3SVHSHC_7969658  | HIF3A        |  | 1.280E-03 |  |           |  |  |              |  |         |
| V3SVHSHC_7029917  | ZNF300       |  | 1.298E-03 |  |           |  |  |              |  |         |
| V3SVHSHC_7354736  | CCL18        |  | 1.312E-03 |  |           |  |  |              |  |         |
| V3SVHSHC_7445618  | PTGS2        |  | 1.322E-03 |  |           |  |  |              |  |         |
| V3SVHSHC_9250025  | MEGF8        |  | 1.344E-03 |  |           |  |  |              |  |         |
| V3SVHSHC_6500993  | INTS1        |  | 1.382E-03 |  |           |  |  |              |  |         |
| V3SVHSHC_5971574  | POLR2L       |  | 1.417E-03 |  |           |  |  |              |  |         |
| V3SVHSHC_10369715 | C2ORF16      |  | 1.419E-03 |  |           |  |  |              |  |         |
| V3SVHSHC_9217586  | FMO2         |  | 1.421E-03 |  |           |  |  |              |  |         |
| V3SVHSHC_5305403  | MRGPRX4      |  | 1.428E-03 |  | 2.198E-06 |  |  |              |  | MRGPRX4 |
| V3SVHSHC_6081629  | EVX2         |  | 1.437E-03 |  |           |  |  |              |  |         |
| V3SVHSHC_8297942  | TATDN2       |  | 1.468E-03 |  |           |  |  |              |  |         |
| V3SVHSHC_9484391  | DDR1         |  | 1.606E-03 |  |           |  |  |              |  |         |
| V3SVHSHC_7287152  | EFHC1        |  | 1.631E-03 |  |           |  |  |              |  |         |
| V3SVHSHC_7824854  | ZBTB24       |  | 1.634E-03 |  |           |  |  |              |  |         |
| V3SVHSHC_6077669  | RAD18        |  | 1.667E-03 |  |           |  |  |              |  |         |
| V3SVHSHC_8336123  | UQCRHL       |  | 1.692E-03 |  |           |  |  |              |  |         |
| V3SVHSHC_8398427  | MED20        |  | 1.745E-03 |  |           |  |  |              |  |         |
| V3SVHSHC_7908707  | FCN1         |  | 1.841E-03 |  |           |  |  |              |  |         |
| V3SVHSHC_7873892  | KLRC4        |  | 1.861E-03 |  |           |  |  |              |  |         |
| V3SVHSHC_5926265  | LOC101929564 |  | 1.987E-03 |  |           |  |  |              |  |         |
| V3SVHSHC_10796207 | BMP1         |  | 2.077E-03 |  |           |  |  |              |  |         |
| V3SVHSHC_8425817  | EBP          |  | 2.180E-03 |  |           |  |  |              |  |         |
| V3SVHSHC_9478748  | PRSS36       |  | 2.185E-03 |  |           |  |  |              |  |         |

|                   |                |  |           |           |           |  |  |  |       |
|-------------------|----------------|--|-----------|-----------|-----------|--|--|--|-------|
| V3SVHSHC_4660352  | NLRP6          |  | 2.214E-03 |           |           |  |  |  |       |
| V3SVHSHC_9090701  | NAA30          |  | 2.256E-03 |           |           |  |  |  |       |
| V3SVHSHC_8989721  | MMGT1          |  | 2.275E-03 |           |           |  |  |  |       |
| V3SVHSHC_8351963  | ANKRD61        |  | 2.349E-03 |           |           |  |  |  |       |
| V3SVHSHC_10377272 | ACCS           |  | 2.394E-03 |           |           |  |  |  |       |
| V3SVHSHC_7556894  | CDC14B         |  | 2.453E-03 |           |           |  |  |  |       |
| V3SVHSHC_9454130  | PRAMEF20       |  | 2.495E-03 |           |           |  |  |  |       |
| V3SVHSHC_6962927  | HEPH           |  | 2.502E-03 |           |           |  |  |  |       |
| V3SVHSHC_8748161  | LOC100132174   |  | 2.591E-03 |           |           |  |  |  |       |
| V3SVHSHC_9468749  | C1orf159       |  | 2.620E-03 | 4.463E-01 |           |  |  |  |       |
| V3SVHSHC_6649328  | PCDHA4         |  | 2.740E-03 |           |           |  |  |  |       |
| V3SVHSHC_9424034  | CACNA2D2       |  | 2.767E-03 |           |           |  |  |  |       |
| V3SVHSHC_7240919  | DUSP2          |  | 2.847E-03 |           | 3.558E-10 |  |  |  | DUSP2 |
| V3SVHSHC_4816739  | DFNA5          |  | 2.962E-03 |           |           |  |  |  |       |
| V3SVHSHC_7492280  | NONO           |  | 2.980E-03 |           |           |  |  |  |       |
| V3SVHSHC_8198876  | SLC5A7         |  | 3.020E-03 |           |           |  |  |  |       |
| V3SVHSHC_6038399  | LOC100653225   |  | 3.114E-03 |           |           |  |  |  |       |
| V3SVHSHC_8922566  | TMEM110-MUSTN1 |  | 3.128E-03 |           |           |  |  |  |       |
| V3SVHSHC_9216464  | MARCH1         |  | 3.164E-03 |           |           |  |  |  |       |
| V3SVHSHC_4853435  | EPC1           |  | 3.279E-03 |           |           |  |  |  |       |
| V3SVHSHC_5385197  | TVP23B         |  | 3.401E-03 |           |           |  |  |  |       |
| V3SVHSHC_7096478  | STAB1          |  | 3.410E-03 |           |           |  |  |  |       |
| V3SVHSHC_6149741  | Cul9           |  | 3.516E-03 |           |           |  |  |  |       |
| V3SVHSHC_7882010  | UNC5CL         |  | 3.598E-03 |           |           |  |  |  |       |
| V3SVHSHC_7857689  | TRH            |  | 3.690E-03 |           |           |  |  |  |       |
| V3SVHSHC_5641607  | UVRAG          |  | 3.764E-03 |           |           |  |  |  |       |
| V3SVHSHC_8018531  | ANAPC10        |  | 3.766E-03 |           |           |  |  |  |       |
| V3SVHSHC_10556858 | TWISTNB        |  | 3.776E-03 |           |           |  |  |  |       |
| V3SVHSHC_7311506  | ZNF687         |  | 3.964E-03 |           |           |  |  |  |       |
| V3SVHSHC_9685493  | MRPS18C        |  | 4.014E-03 |           |           |  |  |  |       |
| V3SVHSHC_10025690 | FGD5           |  | 4.126E-03 |           |           |  |  |  |       |
| V3SVHSHC_6790271  | ATG9A          |  | 4.138E-03 |           |           |  |  |  |       |
| V3SVHSHC_9380408  | MTFMT          |  | 4.153E-03 |           |           |  |  |  |       |
| V3SVHSHC_7400573  | FANCL          |  | 4.202E-03 |           |           |  |  |  |       |
| V3SVHSHC_9989027  | C1QTNF6        |  | 4.241E-03 |           |           |  |  |  |       |
| V3SVHSHC_10794788 | ABHD17C        |  | 4.445E-03 |           |           |  |  |  |       |
| V3SVHSHC_9627578  | MMRN2          |  | 4.478E-03 |           |           |  |  |  |       |
| V3SVHSHC_7984046  | STRBP          |  | 4.490E-03 |           |           |  |  |  |       |
| V3SVHSHC_7208810  | OR56A1         |  | 4.770E-03 |           |           |  |  |  |       |
| V3SVHSHC_10220555 | ARMC8          |  | 5.143E-03 |           |           |  |  |  |       |
| V3SVHSHC_10237055 | HHLA2          |  | 5.176E-03 |           |           |  |  |  |       |
| V3SVHSHC_5855051  | IMPG2          |  | 5.580E-03 |           |           |  |  |  |       |
| V3SVHSHC_10678892 | RDH13          |  | 6.049E-03 |           |           |  |  |  |       |
| V3SVHSHC_7829375  | SLAMF8         |  | 6.071E-03 |           |           |  |  |  |       |
| V3SVHSHC_9820958  | SERINC3        |  | 6.178E-03 |           |           |  |  |  |       |
| V3SVHSHC_6284381  | SRSF12         |  | 6.491E-03 |           |           |  |  |  |       |
| V3SVHSHC_6237323  | COPS4          |  | 6.513E-03 |           |           |  |  |  |       |
| V3SVHSHC_7040477  | BPIFA3         |  | 6.731E-03 |           |           |  |  |  |       |
| V3SVHSHC_5315468  | PLEKHB1        |  | 7.166E-03 |           |           |  |  |  |       |
| V3SVHSHC_5511092  | DCUN1D1        |  | 7.613E-03 |           |           |  |  |  |       |
| V3SVHSHC_10686548 | FAM129A        |  | 7.697E-03 |           |           |  |  |  |       |
| V3SVHSHC_4637912  | LOC642131      |  | 7.818E-03 |           |           |  |  |  |       |
| V3SVHSHC_8613224  | APBA2          |  | 8.203E-03 |           |           |  |  |  |       |
| V3SVHSHC_8565077  | HCN3           |  | 8.532E-03 |           |           |  |  |  |       |
| V3SVHSHC_6888941  | C3orf72        |  | 8.640E-03 |           |           |  |  |  |       |

|                   |              |  |           |           |           |  |  |           |       |
|-------------------|--------------|--|-----------|-----------|-----------|--|--|-----------|-------|
| V3SVHSHC_6233693  | C9ORF117     |  | 8.906E-03 |           |           |  |  |           |       |
| V3SVHSHC_10566989 | PPIB         |  | 9.039E-03 |           |           |  |  |           |       |
| V3SVHSHC_9392684  | ZNF502       |  | 9.080E-03 |           |           |  |  |           |       |
| V3SVHSHC_10854386 | LOC100287651 |  | 9.419E-03 |           |           |  |  |           |       |
| V3SVHSHC_8812775  | OR8B12       |  | 9.469E-03 |           |           |  |  |           |       |
| V3SVHSHC_9274445  | RPS16        |  | 1.045E-02 |           |           |  |  |           |       |
| V3SVHSHC_9530888  | PPIB         |  | 1.053E-02 |           |           |  |  |           |       |
| V3SVHSHC_8033216  | TRPM5        |  | 1.157E-02 |           |           |  |  |           |       |
| V3SVHSHC_10202768 | HHIPL2       |  | 1.157E-02 |           |           |  |  |           |       |
| V3SVHSHC_7932830  | Eif6         |  | 1.177E-02 | 1.851E-01 |           |  |  |           |       |
| V3SVHSHC_8233031  | CORO1B       |  | 1.197E-02 |           |           |  |  |           |       |
| V3SVHSHC_8255504  | TMEM115      |  | 1.223E-02 |           |           |  |  |           |       |
| V3SVHSHC_5285009  | MLH3         |  | 1.268E-02 |           |           |  |  |           |       |
| V3SVHSHC_10197653 | ZNF747       |  | 1.270E-02 |           |           |  |  |           |       |
| V3SVHSHC_8729351  | TTC7A        |  | 1.286E-02 |           |           |  |  |           |       |
| V3SVHSHC_10210490 | SESN1        |  | 1.305E-02 |           |           |  |  |           |       |
| V3SVHSHC_7779743  | C10ORF129    |  | 1.315E-02 |           |           |  |  |           |       |
| V3SVHSHC_9244976  | EMR1         |  | 1.406E-02 |           |           |  |  |           |       |
| V3SVHSHC_8420867  | TOMM5        |  | 1.441E-02 |           |           |  |  |           |       |
| V3SVHSHC_9807197  | SEPHS1       |  | 1.452E-02 |           |           |  |  |           |       |
| V3SVHSHC_8039816  | GAL3ST1      |  | 1.555E-02 |           |           |  |  |           |       |
| V3SVHSHC_6213959  | SNX13        |  | 1.563E-02 |           |           |  |  |           |       |
| V3SVHSHC_8714006  | TM4SF19      |  | 1.591E-02 |           |           |  |  |           |       |
| V3SVHSHC_5766281  | CLRN3        |  | 1.617E-02 |           |           |  |  |           |       |
| V3SVHSHC_4720577  | RBM11        |  | 1.630E-02 |           |           |  |  |           |       |
| V3SVHSHC_5789513  | PRRT1        |  | 1.643E-02 |           |           |  |  |           |       |
| V3SVHSHC_9260849  | SPATA31A5    |  | 1.654E-02 |           |           |  |  |           |       |
| V3SVHSHC_5380181  | FANCB        |  | 1.687E-02 |           |           |  |  |           |       |
| V3SVHSHC_6742190  | SERPINA5     |  | 1.712E-02 |           |           |  |  |           |       |
| V3SVHSHC_8879765  | AKR7A2       |  | 1.726E-02 |           |           |  |  |           |       |
| V3SVHSHC_9982526  | TYW3         |  | 1.799E-02 |           |           |  |  |           |       |
| V3SVHSHC_9987245  | SEMA3A       |  | 1.896E-02 |           |           |  |  |           |       |
| V3SVHSHC_4665632  | HIST1H2AG    |  | 1.948E-02 | 1.088E-11 |           |  |  | HIST1H2AG |       |
| V3SVHSHC_4682132  | KRT72        |  | 2.016E-02 |           | 5.760E-05 |  |  |           | KRT72 |
| V3SVHSHC_7137299  | TTBK1        |  | 2.059E-02 |           | 2.610E-03 |  |  |           |       |
| V3SVHSHC_10674536 | SLC12A1      |  | 2.119E-02 |           |           |  |  |           |       |
| V3SVHSHC_8931476  | AMDHD2       |  | 2.137E-02 |           |           |  |  |           |       |
| V3SVHSHC_8839967  | SLCO6A1      |  | 2.162E-02 |           |           |  |  |           |       |
| V3SVHSHC_10220951 | ESPN         |  | 2.250E-02 |           |           |  |  |           |       |
| V3SVHSHC_6573923  | C3orf35      |  | 2.255E-02 |           |           |  |  |           |       |
| V3SVHSHC_7145483  | NF2          |  | 2.272E-02 |           |           |  |  |           |       |
| V3SVHSHC_9698858  | SH3TC1       |  | 2.312E-02 |           |           |  |  |           |       |
| V3SVHSHC_5407736  | PRR18        |  | 2.316E-02 |           |           |  |  |           |       |
| V3SVHSHC_5477663  | NID2         |  | 2.333E-02 |           |           |  |  |           |       |
| V3SVHSHC_5286164  | RTP3         |  | 2.342E-02 |           |           |  |  |           |       |
| V3SVHSHC_7165580  | PIAS3        |  | 2.478E-02 |           |           |  |  |           |       |
| V3SVHSHC_10091525 | MAPRE3       |  | 2.486E-02 |           |           |  |  |           |       |
| V3SVHSHC_8120237  | NARS         |  | 2.493E-02 |           |           |  |  |           |       |
| V3SVHSHC_4875941  | SLC6A18      |  | 2.542E-02 |           |           |  |  |           |       |
| V3SVHSHC_9266360  | SLC39A10     |  | 2.593E-02 |           |           |  |  |           |       |
| V3SVHSHC_8489177  | NTF4         |  | 2.619E-02 |           |           |  |  |           |       |
| V3SVHSHC_10352588 | DOK7         |  | 2.635E-02 |           |           |  |  |           |       |
| V3SVHSHC_8567981  | ZNF483       |  | 2.644E-02 |           |           |  |  |           |       |
| V3SVHSHC_5118689  | GEMIN7       |  | 2.679E-02 |           |           |  |  |           |       |

|                   |              |  |           |           |           |  |  |       |       |
|-------------------|--------------|--|-----------|-----------|-----------|--|--|-------|-------|
| V3SVHSHC_8023547  | NUP93        |  | 2.760E-02 |           |           |  |  |       |       |
| V3SVHSHC_6467663  | ESR1         |  | 2.800E-02 |           |           |  |  |       |       |
| V3SVHSHC_8965433  | FCN1         |  | 2.897E-02 |           |           |  |  |       |       |
| V3SVHSHC_7503566  | PRSS1        |  | 3.002E-02 |           |           |  |  |       |       |
| V3SVHSHC_7513961  | UTP23        |  | 3.061E-02 |           | 5.913E-11 |  |  |       | UTP23 |
| V3SVHSHC_9534452  | PRPF40B      |  | 3.143E-02 |           |           |  |  |       |       |
| V3SVHSHC_9992096  | GRHL2        |  | 3.280E-02 |           |           |  |  |       |       |
| V3SVHSHC_9296357  | PNPLA8       |  | 3.329E-02 |           |           |  |  |       |       |
| V3SVHSHC_9019124  | PNLIPRP2     |  | 3.329E-02 |           |           |  |  |       |       |
| V3SVHSHC_7369817  | ETHE1        |  | 3.456E-02 |           |           |  |  |       |       |
| V3SVHSHC_9660347  | UGT1A1       |  | 3.505E-02 |           |           |  |  |       |       |
| V3SVHSHC_5535182  | BANF2        |  | 3.528E-02 |           |           |  |  |       |       |
| V3SVHSHC_8313980  | ICOSLG       |  | 3.554E-02 |           |           |  |  |       |       |
| V3SVHSHC_6178286  | Haus4        |  | 3.585E-02 |           |           |  |  |       |       |
| V3SVHSHC_9575108  | NDUFV2       |  | 4.102E-02 |           |           |  |  |       |       |
| V3SVHSHC_4667876  | SYNJ2        |  | 4.148E-02 |           |           |  |  |       |       |
| V3SVHSHC_9284510  | NANOGB       |  | 4.272E-02 |           |           |  |  |       |       |
| V3SVHSHC_7027640  | KRTAP10-7    |  | 4.325E-02 |           |           |  |  |       |       |
| V3SVHSHC_9341468  | STARD3NL     |  | 4.329E-02 |           |           |  |  |       |       |
| V3SVHSHC_9211745  | Tmem89       |  | 4.335E-02 |           |           |  |  |       |       |
| V3SVHSHC_5159114  | NUDT15       |  | 4.419E-02 |           |           |  |  |       |       |
| V3SVHSHC_5918972  | UQCRH        |  | 4.562E-02 |           |           |  |  |       |       |
| V3SVHSHC_5647646  | TTC39B       |  | 4.898E-02 |           |           |  |  |       |       |
| V3SVHSHC_8344967  | OXCT1        |  | 5.049E-02 |           |           |  |  |       |       |
| V3SVHSHC_7736513  | SNAPC4       |  | 5.149E-02 |           |           |  |  |       |       |
| V3SVHSHC_5065922  | TSPYL5       |  | 5.276E-02 |           |           |  |  |       |       |
| V3SVHSHC_5004641  | SLC2A12      |  | 5.814E-02 |           |           |  |  |       |       |
| V3SVHSHC_9220424  | CCL3L3       |  | 5.820E-02 |           |           |  |  |       |       |
| V3SVHSHC_4823108  | DRD5         |  | 5.848E-02 |           |           |  |  |       |       |
| V3SVHSHC_8387735  | URB1         |  | 6.046E-02 |           |           |  |  |       |       |
| V3SVHSHC_6818882  | PREPL        |  | 6.154E-02 |           |           |  |  |       |       |
| V3SVHSHC_6708662  | LOC100505498 |  | 6.186E-02 |           |           |  |  |       |       |
| V3SVHSHC_6718628  | DCTPP1       |  | 6.190E-02 |           |           |  |  |       |       |
| V3SVHSHC_5578016  | CTNNA1       |  | 6.389E-02 |           | 2.361E-01 |  |  |       |       |
| V3SVHSHC_9499439  | HSPB8        |  | 6.942E-02 |           |           |  |  |       |       |
| V3SVHSHC_7115024  | MCMBP        |  | 6.944E-02 |           |           |  |  |       |       |
| V3SVHSHC_5554619  | Adat3        |  | 7.148E-02 |           |           |  |  |       |       |
| V3SVHSHC_8736875  | PRR3         |  | 7.461E-02 |           |           |  |  |       |       |
| V3SVHSHC_7032293  | SCG2         |  | 7.604E-02 |           |           |  |  |       |       |
| V3SVHSHC_9745091  | NOX5         |  | 7.766E-02 |           |           |  |  |       |       |
| V3SVHSHC_8424761  | TRIP6        |  | 7.911E-02 |           |           |  |  |       |       |
| V3SVHSHC_6219239  | TK2          |  | 8.005E-02 |           |           |  |  |       |       |
| V3SVHSHC_6820268  | LMBR1        |  | 8.028E-02 | 5.928E-09 |           |  |  | LMBR1 |       |
| V3SVHSHC_6000647  | TRIM51       |  | 8.040E-02 |           |           |  |  |       |       |
| V3SVHSHC_6688862  | SARDH        |  | 8.118E-02 |           |           |  |  |       |       |
| V3SVHSHC_8868809  | TICRR        |  | 8.462E-02 |           |           |  |  |       |       |
| V3SVHSHC_6114332  | KCNIP1       |  | 8.653E-02 |           |           |  |  |       |       |
| V3SVHSHC_9886166  | MALT1        |  | 8.828E-02 |           |           |  |  |       |       |
| V3SVHSHC_9152642  | FXDY5        |  | 8.864E-02 |           |           |  |  |       |       |
| V3SVHSHC_6352790  | DFFA         |  | 8.980E-02 |           |           |  |  |       |       |
| V3SVHSHC_6310121  | LOC646862    |  | 9.010E-02 |           |           |  |  |       |       |
| V3SVHSHC_10200359 | LINS         |  | 9.202E-02 |           |           |  |  |       |       |
| V3SVHSHC_5092190  | KLF9         |  | 9.519E-02 |           |           |  |  |       |       |
| V3SVHSHC_8354207  | EEF2         |  | 9.560E-02 | 5.414E-02 |           |  |  |       |       |
| V3SVHSHC_4894916  | PAEP         |  | 9.660E-02 |           |           |  |  |       |       |

|                   |              |  |           |           |           |  |  |  |         |
|-------------------|--------------|--|-----------|-----------|-----------|--|--|--|---------|
| V3SVHSHC_5416184  | NDUFS3       |  | 9.662E-02 |           |           |  |  |  |         |
| V3SVHSHC_7080011  | ZNF407       |  | 9.888E-02 |           |           |  |  |  |         |
| V3SVHSHC_8587913  | CRIP3        |  | 9.894E-02 |           |           |  |  |  |         |
| V3SVHSHC_7340876  | GPBP1        |  | 1.027E-01 |           | 1.282E-02 |  |  |  |         |
| V3SVHSHC_5794133  | PLGRKT       |  | 1.029E-01 |           |           |  |  |  |         |
| V3SVHSHC_5879735  | CD244        |  | 1.037E-01 |           |           |  |  |  |         |
| V3SVHSHC_9844421  | NAGPA        |  | 1.067E-01 |           |           |  |  |  |         |
| V3SVHSHC_5536865  | POU6F1       |  | 1.087E-01 |           |           |  |  |  |         |
| V3SVHSHC_9062090  | FHDC1        |  | 1.124E-01 |           |           |  |  |  |         |
| V3SVHSHC_6249302  | MYH10        |  | 1.129E-01 |           |           |  |  |  |         |
| V3SVHSHC_8143370  | FOLR2        |  | 1.154E-01 |           |           |  |  |  |         |
| V3SVHSHC_7175414  | STAMPB       |  | 1.207E-01 |           |           |  |  |  |         |
| V3SVHSHC_10605401 | LOC100506571 |  | 1.221E-01 |           |           |  |  |  |         |
| V3SVHSHC_7140665  | HIST1H3J     |  | 1.224E-01 |           |           |  |  |  |         |
| V3SVHSHC_10510427 | IL7          |  | 1.269E-01 |           |           |  |  |  |         |
| V3SVHSHC_8812841  | LOC101927085 |  | 1.318E-01 |           |           |  |  |  |         |
| V3SVHSHC_5208680  | MYB          |  | 1.319E-01 |           |           |  |  |  |         |
| V3SVHSHC_7345364  | GAPT         |  | 1.344E-01 |           |           |  |  |  |         |
| V3SVHSHC_10551875 | ZNF280C      |  | 1.370E-01 |           |           |  |  |  |         |
| V3SVHSHC_7022789  | TXLNB        |  | 1.381E-01 |           |           |  |  |  |         |
| V3SVHSHC_10618502 | RECQL        |  | 1.409E-01 |           |           |  |  |  |         |
| V3SVHSHC_6246134  | SH3PXD2A     |  | 1.410E-01 |           |           |  |  |  |         |
| V3SVHSHC_9464261  | DPY19L2      |  | 1.433E-01 |           | 2.042E-04 |  |  |  | DPY19L2 |
| V3SVHSHC_7020050  | PDZD2        |  | 1.446E-01 |           |           |  |  |  |         |
| V3SVHSHC_8804888  | MECR         |  | 1.480E-01 |           |           |  |  |  |         |
| V3SVHSHC_5376287  | ZNF605       |  | 1.480E-01 |           |           |  |  |  |         |
| V3SVHSHC_5648240  | AP2M1        |  | 1.485E-01 |           |           |  |  |  |         |
| V3SVHSHC_5106842  | TIMM17A      |  | 1.504E-01 |           |           |  |  |  |         |
| V3SVHSHC_5622698  | PCDH18       |  | 1.516E-01 |           |           |  |  |  |         |
| V3SVHSHC_8466011  | PFDN4        |  | 1.583E-01 |           | 2.575E-01 |  |  |  |         |
| V3SVHSHC_9242237  | HLA-DRB4     |  | 1.607E-01 |           |           |  |  |  |         |
| V3SVHSHC_6707672  | ATP11C       |  | 1.639E-01 |           |           |  |  |  |         |
| V3SVHSHC_9739085  | EBP          |  | 1.671E-01 |           |           |  |  |  |         |
| V3SVHSHC_6436907  | COL4A1       |  | 1.722E-01 |           |           |  |  |  |         |
| V3SVHSHC_6528746  | PATL1        |  | 1.736E-01 |           |           |  |  |  |         |
| V3SVHSHC_5295074  | PPM1H        |  | 1.737E-01 |           |           |  |  |  |         |
| V3SVHSHC_7539338  | YEATS4       |  | 1.749E-01 |           |           |  |  |  |         |
| V3SVHSHC_8795186  | TMEM106C     |  | 1.755E-01 |           |           |  |  |  |         |
| V3SVHSHC_9483434  | FAM185A      |  | 1.767E-01 |           | 2.624E-01 |  |  |  |         |
| V3SVHSHC_7586594  | STON1        |  | 1.805E-01 |           |           |  |  |  |         |
| V3SVHSHC_6498782  | ZNF234       |  | 1.818E-01 |           |           |  |  |  |         |
| V3SVHSHC_5057606  | ZNF532       |  | 1.876E-01 |           |           |  |  |  |         |
| V3SVHSHC_10847918 | TTLL10       |  | 1.896E-01 |           |           |  |  |  |         |
| V3SVHSHC_9033908  | ZCCHC6       |  | 1.896E-01 |           |           |  |  |  |         |
| V3SVHSHC_8294246  | PCDHA6       |  | 1.940E-01 | 9.291E-05 |           |  |  |  | PCDHA6  |
| V3SVHSHC_5160137  | YAP1         |  | 1.999E-01 |           |           |  |  |  |         |
| V3SVHSHC_9449147  | DDX31        |  | 2.033E-01 |           |           |  |  |  |         |
| V3SVHSHC_7547060  | PPP2R1A      |  | 2.107E-01 | 1.111E-01 |           |  |  |  |         |
| V3SVHSHC_7922336  | NCMAP        |  | 2.129E-01 |           |           |  |  |  |         |
| V3SVHSHC_7507097  | DNAJB12      |  | 2.157E-01 |           |           |  |  |  |         |
| V3SVHSHC_9600089  | PDLIM2       |  | 2.170E-01 |           |           |  |  |  |         |
| V3SVHSHC_9334142  | JTB          |  | 2.178E-01 | 2.786E-02 |           |  |  |  |         |
| V3SVHSHC_6029885  | FGFR1        |  | 2.235E-01 | 2.840E-01 |           |  |  |  |         |
| V3SVHSHC_8099447  | WDFY3        |  | 2.239E-01 |           |           |  |  |  |         |
| V3SVHSHC_7210955  | MRPS26       |  | 2.286E-01 |           |           |  |  |  |         |

|                   |              |  |           |           |           |  |  |  |  |       |
|-------------------|--------------|--|-----------|-----------|-----------|--|--|--|--|-------|
| V3SVHSHC_6844886  | PPIB         |  | 2.351E-01 | 1.251E-01 | 4.269E-01 |  |  |  |  |       |
| V3SVHSHC_7863893  | GZMM         |  | 2.365E-01 |           |           |  |  |  |  |       |
| V3SVHSHC_5892869  | AURKA        |  | 2.366E-01 |           |           |  |  |  |  |       |
| V3SVHSHC_7816901  | CENPE        |  | 2.399E-01 | 4.091E-02 |           |  |  |  |  |       |
| V3SVHSHC_9617084  | RPL11        |  | 2.482E-01 |           |           |  |  |  |  |       |
| V3SVHSHC_7285139  | OGFRL1       |  | 2.522E-01 |           |           |  |  |  |  |       |
| V3SVHSHC_9552965  | WDR54        |  | 2.549E-01 |           |           |  |  |  |  |       |
| V3SVHSHC_8130830  | TLR4         |  | 2.550E-01 |           |           |  |  |  |  |       |
| V3SVHSHC_10010246 | PPARD        |  | 2.560E-01 |           |           |  |  |  |  |       |
| V3SVHSHC_6577124  | NDUFA3       |  | 2.565E-01 |           |           |  |  |  |  |       |
| V3SVHSHC_10148681 | ZNF625       |  | 2.627E-01 |           |           |  |  |  |  |       |
| V3SVHSHC_5193599  | RAE1         |  | 2.764E-01 |           | 2.115E-01 |  |  |  |  |       |
| V3SVHSHC_9630614  | CTSS         |  | 2.780E-01 |           |           |  |  |  |  |       |
| V3SVHSHC_4845350  | ABCG5        |  | 2.790E-01 |           | 5.888E-16 |  |  |  |  | ABCG5 |
| V3SVHSHC_5377310  | NIP7         |  | 2.818E-01 | 9.163E-02 |           |  |  |  |  |       |
| V3SVHSHC_9243260  | WDR62        |  | 2.829E-01 |           |           |  |  |  |  |       |
| V3SVHSHC_8861945  | NKX2-6       |  | 2.840E-01 |           |           |  |  |  |  |       |
| V3SVHSHC_6796706  | IKZF4        |  | 2.845E-01 |           |           |  |  |  |  |       |
| V3SVHSHC_8893097  | SCAP         |  | 2.886E-01 |           |           |  |  |  |  |       |
| V3SVHSHC_10743737 | ADAM10       |  | 2.888E-01 |           |           |  |  |  |  |       |
| V3SVHSHC_6618341  | GINS3        |  | 2.917E-01 |           |           |  |  |  |  |       |
| V3SVHSHC_9100634  | LOC101928049 |  | 3.040E-01 |           |           |  |  |  |  |       |
| V3SVHSHC_6336125  | FUZ          |  | 3.048E-01 |           |           |  |  |  |  |       |
| V3SVHSHC_5318273  | C11orf44     |  | 3.051E-01 |           |           |  |  |  |  |       |
| V3SVHSHC_10254446 | ITPK1        |  | 3.064E-01 |           |           |  |  |  |  |       |
| V3SVHSHC_7328765  | GTSE1        |  | 3.095E-01 |           |           |  |  |  |  |       |
| V3SVHSHC_7689059  | LRRC3C       |  | 3.114E-01 |           |           |  |  |  |  |       |
| V3SVHSHC_9450731  | Eif6         |  | 3.140E-01 |           |           |  |  |  |  |       |
| V3SVHSHC_8417996  | OR2AG2       |  | 3.168E-01 |           | 4.776E-01 |  |  |  |  |       |
| V3SVHSHC_10843760 | H3F3B        |  | 3.271E-01 |           |           |  |  |  |  |       |
| V3SVHSHC_5236334  | PAK3         |  | 3.279E-01 |           |           |  |  |  |  |       |
| V3SVHSHC_8069582  | PDE6G        |  | 3.309E-01 |           |           |  |  |  |  |       |
| V3SVHSHC_10634804 | ACTB         |  | 3.340E-01 |           | 4.800E-01 |  |  |  |  |       |
| V3SVHSHC_8688695  | POLG2        |  | 3.357E-01 |           |           |  |  |  |  |       |
| V3SVHSHC_10072385 | TERF1        |  | 3.370E-01 |           |           |  |  |  |  |       |
| V3SVHSHC_10634474 | Unc119b      |  | 3.433E-01 |           |           |  |  |  |  |       |
| V3SVHSHC_5006654  | OCM          |  | 3.514E-01 | 2.533E-01 | 2.461E-01 |  |  |  |  |       |
| V3SVHSHC_6906233  | NECAB1       |  | 3.528E-01 | 3.931E-01 |           |  |  |  |  |       |
| V3SVHSHC_5551814  | YEATS4       |  | 3.551E-01 |           |           |  |  |  |  |       |
| V3SVHSHC_9505841  | CSDE1        |  | 3.566E-01 |           |           |  |  |  |  |       |
| V3SVHSHC_8679422  | OR2K2        |  | 3.574E-01 |           |           |  |  |  |  |       |
| V3SVHSHC_10457693 | CCDC50       |  | 3.578E-01 |           |           |  |  |  |  |       |
| V3SVHSHC_6857987  | RNASEH2C     |  | 3.601E-01 |           |           |  |  |  |  |       |
| V3SVHSHC_7409846  | C2orf69      |  | 3.628E-01 |           |           |  |  |  |  |       |
| V3SVHSHC_9648170  | SETD1A       |  | 3.629E-01 |           |           |  |  |  |  |       |
| V3SVHSHC_10042091 | EIF2S2       |  | 3.637E-01 |           |           |  |  |  |  |       |
| V3SVHSHC_8807000  | LEPR         |  | 3.652E-01 |           |           |  |  |  |  |       |
| V3SVHSHC_9730538  | MEIG1        |  | 3.712E-01 |           | 2.125E-19 |  |  |  |  | MEIG1 |
| V3SVHSHC_9767498  | ACTB         |  | 3.714E-01 |           |           |  |  |  |  |       |
| V3SVHSHC_8863925  | CHRND        |  | 3.746E-01 |           |           |  |  |  |  |       |
| V3SVHSHC_8965961  | PFDN4        |  | 3.788E-01 | 4.931E-01 | 4.668E-01 |  |  |  |  |       |
| V3SVHSHC_7798025  | KIF3C        |  | 3.862E-01 |           |           |  |  |  |  |       |
| V3SVHSHC_6268640  | MNAT1        |  | 3.869E-01 |           |           |  |  |  |  |       |
| V3SVHSHC_6726284  | SOWAHC       |  | 3.874E-01 |           |           |  |  |  |  |       |
| V3SVHSHC_7693877  | DPP3         |  | 3.884E-01 |           |           |  |  |  |  |       |

|                   |              |  |           |           |           |  |  |              |         |
|-------------------|--------------|--|-----------|-----------|-----------|--|--|--------------|---------|
| V3SVHSHC_8155778  | SPAG17       |  | 3.896E-01 |           |           |  |  |              |         |
| V3SVHSHC_4830764  | SLC2A11      |  | 4.060E-01 |           | 1.030E-25 |  |  |              | SLC2A11 |
| V3SVHSHC_7766345  | LOC101927645 |  | 4.067E-01 |           |           |  |  |              |         |
| V3SVHSHC_9327113  | SNAI1        |  | 4.102E-01 | 1.675E-03 |           |  |  |              |         |
| V3SVHSHC_6538613  | ATRN         |  | 4.168E-01 |           |           |  |  |              |         |
| V3SVHSHC_8215838  | Minos1       |  | 4.203E-01 |           |           |  |  |              |         |
| V3SVHSHC_7335761  | RHOBTB3      |  | 4.213E-01 |           | 4.822E-07 |  |  |              | RHOBTB3 |
| V3SVHSHC_9422417  | STPG2        |  | 4.280E-01 |           |           |  |  |              |         |
| V3SVHSHC_6910721  | FANCD2       |  | 4.389E-01 |           |           |  |  |              |         |
| V3SVHSHC_7343516  | PTPN3        |  | 4.410E-01 |           |           |  |  |              |         |
| V3SVHSHC_6347213  | KLHL12       |  | 4.563E-01 |           |           |  |  |              |         |
| V3SVHSHC_9512441  | ZNF146       |  | 4.589E-01 |           |           |  |  |              |         |
| V3SVHSHC_9726743  | ARMS2        |  | 4.673E-01 |           |           |  |  |              |         |
| V3SVHSHC_5086349  | MAPK8IP1     |  | 4.742E-01 |           |           |  |  |              |         |
| V3SVHSHC_8473766  | SLC45A3      |  | 4.846E-01 |           |           |  |  |              |         |
| V3SVHSHC_10551380 | SIRPG        |  | 4.888E-01 |           |           |  |  |              |         |
| V3SVHSHC_7245539  | MANSC4       |  |           | 2.785E-57 |           |  |  | MANSC4       |         |
| V3SVHSHC_5739254  | KCNN2        |  |           | 5.522E-57 |           |  |  | KCNN2        |         |
| V3SVHSHC_8937911  | TRMT6        |  |           | 3.680E-54 | 1.633E-13 |  |  | TRMT6        | TRMT6   |
| V3SVHSHC_5999987  | SRSF3        |  |           | 5.686E-54 |           |  |  | SRSF3        |         |
| V3SVHSHC_8095355  | FLT4         |  |           | 1.031E-53 |           |  |  | FLT4         |         |
| V3SVHSHC_9536333  | KCNG3        |  |           | 7.867E-53 |           |  |  | KCNG3        |         |
| V3SVHSHC_9804128  | CRYAB        |  |           | 1.144E-52 |           |  |  | CRYAB        |         |
| V3SVHSHC_9585635  | ENPP3        |  |           | 8.805E-52 |           |  |  | ENPP3        |         |
| V3SVHSHC_9611771  | DERL1        |  |           | 1.699E-51 |           |  |  | DERL1        |         |
| V3SVHSHC_6791360  | LOC101928356 |  |           | 4.827E-51 |           |  |  | LOC101928356 |         |
| V3SVHSHC_8386316  | OR2M7        |  |           | 1.814E-50 |           |  |  | OR2M7        |         |
| V3SVHSHC_10553459 | RPS4X        |  |           | 9.087E-50 |           |  |  | RPS4X        |         |
| V3SVHSHC_9147428  | STOML2       |  |           | 1.104E-48 |           |  |  | STOML2       |         |
| V3SVHSHC_9123932  | TOMM70A      |  |           | 2.172E-48 |           |  |  | TOMM70A      |         |
| V3SVHSHC_7613852  | STMN3        |  |           | 2.306E-47 |           |  |  | STMN3        |         |
| V3SVHSHC_7377242  | DNAJB8       |  |           | 3.164E-47 |           |  |  | DNAJB8       |         |
| V3SVHSHC_9359024  | GCSH         |  |           | 1.037E-46 |           |  |  | GCSH         |         |
| V3SVHSHC_10305035 | DMBT1        |  |           | 1.472E-46 |           |  |  | DMBT1        |         |
| V3SVHSHC_5236598  | FCGR3B       |  |           | 4.973E-46 |           |  |  | FCGR3B       |         |
| V3SVHSHC_10539005 | SLC25A16     |  |           | 5.537E-46 |           |  |  | SLC25A16     |         |
| V3SVHSHC_5846405  | LMAN2L       |  |           | 8.118E-46 |           |  |  | LMAN2L       |         |
| V3SVHSHC_5661242  | ENPP3        |  |           | 1.323E-45 |           |  |  | ENPP3        |         |
| V3SVHSHC_10209302 | LSM1         |  |           | 9.369E-45 |           |  |  | LSM1         |         |
| V3SVHSHC_8365361  | BIRC7        |  |           | 2.681E-43 |           |  |  | BIRC7        |         |
| V3SVHSHC_9610583  | AMIGO1       |  |           | 3.055E-43 |           |  |  | AMIGO1       |         |
| V3SVHSHC_9542108  | MED18        |  |           | 3.772E-43 |           |  |  | MED18        |         |
| V3SVHSHC_9240455  | LRRC42       |  |           | 4.031E-43 |           |  |  | LRRC42       |         |
| V3SVHSHC_7561811  | TGIF1        |  |           | 4.929E-43 |           |  |  | TGIF1        |         |
| V3SVHSHC_6720278  | ARHGAP23     |  |           | 5.278E-43 |           |  |  | ARHGAP23     |         |
| V3SVHSHC_9967676  | OR2F2        |  |           | 1.836E-42 |           |  |  | OR2F2        |         |
| V3SVHSHC_9945962  | PEX3         |  |           | 1.199E-41 |           |  |  | PEX3         |         |
| V3SVHSHC_10401362 | LDHD         |  |           | 5.150E-41 |           |  |  | LDHD         |         |
| V3SVHSHC_6240194  | THEMIS       |  |           | 5.406E-41 |           |  |  | THEMIS       |         |
| V3SVHSHC_6744632  | FBXO46       |  |           | 7.104E-41 |           |  |  | FBXO46       |         |
| V3SVHSHC_7774595  | STARD4       |  |           | 2.356E-40 |           |  |  | STARD4       |         |
| V3SVHSHC_6134627  | SLC25A12     |  |           | 2.595E-40 |           |  |  | SLC25A12     |         |
| V3SVHSHC_6515447  | C14ORF1      |  |           | 5.184E-40 |           |  |  | C14ORF1      |         |

|                   |                |  |  |           |  |  |  |                |  |
|-------------------|----------------|--|--|-----------|--|--|--|----------------|--|
| V3SVHSHC_7116179  | SFTPC          |  |  | 9.381E-40 |  |  |  | SFTPC          |  |
| V3SVHSHC_10769180 | BIRC6          |  |  | 1.782E-39 |  |  |  | BIRC6          |  |
| V3SVHSHC_6259301  | LDB1           |  |  | 1.920E-39 |  |  |  | LDB1           |  |
| V3SVHSHC_7231976  | ZNF248         |  |  | 2.533E-39 |  |  |  | ZNF248         |  |
| V3SVHSHC_8362358  | CEACAM19       |  |  | 4.870E-39 |  |  |  | CEACAM19       |  |
| V3SVHSHC_5596298  | BBS10          |  |  | 8.981E-39 |  |  |  | BBS10          |  |
| V3SVHSHC_9210788  | SRPR           |  |  | 9.489E-39 |  |  |  | SRPR           |  |
| V3SVHSHC_6579830  | HNRNPA3        |  |  | 1.300E-38 |  |  |  | HNRNPA3        |  |
| V3SVHSHC_7427468  | DYNLT3         |  |  | 1.391E-38 |  |  |  | DYNLT3         |  |
| V3SVHSHC_8150564  | DPF1           |  |  | 8.075E-38 |  |  |  | DPF1           |  |
| V3SVHSHC_7016519  | CYB561D2       |  |  | 1.412E-37 |  |  |  | CYB561D2       |  |
| V3SVHSHC_8665727  | FEV            |  |  | 1.741E-37 |  |  |  | FEV            |  |
| V3SVHSHC_7895243  | IL32           |  |  | 4.867E-37 |  |  |  | IL32           |  |
| V3SVHSHC_10483664 | SHOX           |  |  | 5.890E-37 |  |  |  | SHOX           |  |
| V3SVHSHC_7196930  | MEGF11         |  |  | 7.240E-37 |  |  |  | MEGF11         |  |
| V3SVHSHC_5480138  | KIAA1429       |  |  | 8.414E-37 |  |  |  | KIAA1429       |  |
| V3SVHSHC_6246728  | DNMT3L         |  |  | 1.376E-36 |  |  |  | DNMT3L         |  |
| V3SVHSHC_6525578  | LCE2B          |  |  | 1.940E-36 |  |  |  | LCE2B          |  |
| V3SVHSHC_9696713  | PATE3          |  |  | 2.100E-36 |  |  |  | PATE3          |  |
| V3SVHSHC_4778426  | TOB1           |  |  | 5.776E-36 |  |  |  | TOB1           |  |
| V3SVHSHC_7775453  | ARID5B         |  |  | 6.039E-36 |  |  |  | ARID5B         |  |
| V3SVHSHC_9827492  | OTOP2          |  |  | 6.385E-36 |  |  |  | OTOP2          |  |
| V3SVHSHC_9832112  | KCNC3          |  |  | 7.680E-36 |  |  |  | KCNC3          |  |
| V3SVHSHC_10363709 | IKZF1          |  |  | 1.317E-35 |  |  |  | IKZF1          |  |
| V3SVHSHC_9175214  | ZNF174         |  |  | 1.507E-35 |  |  |  | ZNF174         |  |
| V3SVHSHC_9736379  | SIN3B          |  |  | 1.944E-35 |  |  |  | SIN3B          |  |
| V3SVHSHC_9044600  | BCL9           |  |  | 2.222E-35 |  |  |  | BCL9           |  |
| V3SVHSHC_9824258  | LYZL1          |  |  | 2.346E-35 |  |  |  | LYZL1          |  |
| V3SVHSHC_9506699  | UGT1A1         |  |  | 2.569E-35 |  |  |  | UGT1A1         |  |
| V3SVHSHC_5580689  | GALNT16        |  |  | 5.974E-35 |  |  |  | GALNT16        |  |
| V3SVHSHC_6044834  | KRT8           |  |  | 8.623E-35 |  |  |  | KRT8           |  |
| V3SVHSHC_6222176  | UBOX5          |  |  | 9.918E-35 |  |  |  | UBOX5          |  |
| V3SVHSHC_7295072  | UBE2V2         |  |  | 1.085E-34 |  |  |  | UBE2V2         |  |
| V3SVHSHC_4648538  | DCLRE1B        |  |  | 3.170E-34 |  |  |  | DCLRE1B        |  |
| V3SVHSHC_7606427  | CARD16         |  |  | 3.241E-34 |  |  |  | CARD16         |  |
| V3SVHSHC_8649623  | NFKB2          |  |  | 3.580E-34 |  |  |  | NFKB2          |  |
| V3SVHSHC_5307581  | SYT2           |  |  | 3.888E-34 |  |  |  | SYT2           |  |
| V3SVHSHC_8997608  | RASGEF1A       |  |  | 8.485E-34 |  |  |  | RASGEF1A       |  |
| V3SVHSHC_7072520  | IFI27L1        |  |  | 8.634E-34 |  |  |  | IFI27L1        |  |
| V3SVHSHC_7193333  | NACC2          |  |  | 2.187E-33 |  |  |  | NACC2          |  |
| V3SVHSHC_8105750  | MYO5C          |  |  | 2.784E-33 |  |  |  | MYO5C          |  |
| V3SVHSHC_6849539  | TIAF1          |  |  | 2.948E-33 |  |  |  | TIAF1          |  |
| V3SVHSHC_8624939  | TMEM189-UBE2V1 |  |  | 3.037E-33 |  |  |  | TMEM189-UBE2V1 |  |
| V3SVHSHC_8374007  | S100A12        |  |  | 4.978E-33 |  |  |  | S100A12        |  |
| V3SVHSHC_6757667  | ZNF19          |  |  | 6.340E-33 |  |  |  | ZNF19          |  |
| V3SVHSHC_9983384  | MRPL51         |  |  | 6.561E-33 |  |  |  | MRPL51         |  |
| V3SVHSHC_5497826  | ATP2B4         |  |  | 7.880E-33 |  |  |  | ATP2B4         |  |
| V3SVHSHC_5693846  | NPM3           |  |  | 1.135E-32 |  |  |  | NPM3           |  |
| V3SVHSHC_4938971  | Izumo2         |  |  | 1.144E-32 |  |  |  | Izumo2         |  |
| V3SVHSHC_6133406  | Carkd          |  |  | 1.473E-32 |  |  |  | Carkd          |  |
| V3SVHSHC_9952133  | SKI            |  |  | 1.681E-32 |  |  |  | SKI            |  |
| V3SVHSHC_9062552  | CTBP2          |  |  | 2.306E-32 |  |  |  | CTBP2          |  |



|                   |              |  |  |           |           |  |  |              |  |
|-------------------|--------------|--|--|-----------|-----------|--|--|--------------|--|
| V3SVHSHC_6345068  | GOLGA2       |  |  | 2.756E-32 |           |  |  | GOLGA2       |  |
| V3SVHSHC_10096277 | LOC101060399 |  |  | 3.135E-32 |           |  |  | LOC101060399 |  |
| V3SVHSHC_8039585  | MS4A6A       |  |  | 3.386E-32 |           |  |  | MS4A6A       |  |
| V3SVHSHC_6653552  | FERMT1       |  |  | 3.719E-32 |           |  |  | FERMT1       |  |
| V3SVHSHC_6124397  | ZNF93        |  |  | 4.590E-32 | 1.948E-03 |  |  | ZNF93        |  |
| V3SVHSHC_9898871  | CHST12       |  |  | 5.263E-32 |           |  |  | CHST12       |  |
| V3SVHSHC_9466010  | ATP4A        |  |  | 6.484E-32 |           |  |  | ATP4A        |  |
| V3SVHSHC_5955866  | ZNF396       |  |  | 7.082E-32 |           |  |  | ZNF396       |  |
| V3SVHSHC_6630980  | SLC11A1      |  |  | 1.116E-31 | 4.239E-01 |  |  | SLC11A1      |  |
| V3SVHSHC_5603393  | MIA3         |  |  | 1.315E-31 |           |  |  | MIA3         |  |
| V3SVHSHC_8003450  | PILRB        |  |  | 1.457E-31 |           |  |  | PILRB        |  |
| V3SVHSHC_9816503  | PI16         |  |  | 1.755E-31 |           |  |  | PI16         |  |
| V3SVHSHC_5689655  | AGPAT6       |  |  | 3.505E-31 |           |  |  | AGPAT6       |  |
| V3SVHSHC_6842675  | Cisd2        |  |  | 4.349E-31 |           |  |  | Cisd2        |  |
| V3SVHSHC_5770736  | OR11G2       |  |  | 4.508E-31 |           |  |  | OR11G2       |  |
| V3SVHSHC_5981672  | ZSCAN30      |  |  | 4.966E-31 |           |  |  | ZSCAN30      |  |
| V3SVHSHC_8150267  | BRSK1        |  |  | 5.913E-31 |           |  |  | BRSK1        |  |
| V3SVHSHC_5995136  | LMF2         |  |  | 7.111E-31 |           |  |  | LMF2         |  |
| V3SVHSHC_9354998  | ACSS1        |  |  | 7.485E-31 |           |  |  | ACSS1        |  |
| V3SVHSHC_10734959 | SLAMF6       |  |  | 8.494E-31 |           |  |  | SLAMF6       |  |
| V3SVHSHC_10798451 | DUS4L        |  |  | 1.065E-30 |           |  |  | DUS4L        |  |
| V3SVHSHC_6746876  | RBKS         |  |  | 1.227E-30 |           |  |  | RBKS         |  |
| V3SVHSHC_9743243  | FAM200B      |  |  | 1.289E-30 |           |  |  | FAM200B      |  |
| V3SVHSHC_10784426 | ETNK2        |  |  | 1.514E-30 |           |  |  | ETNK2        |  |
| V3SVHSHC_8017178  | CRTC2        |  |  | 1.543E-30 |           |  |  | CRTC2        |  |
| V3SVHSHC_7808717  | KCNA5        |  |  | 1.635E-30 |           |  |  | KCNA5        |  |
| V3SVHSHC_9415322  | LIMCH1       |  |  | 1.681E-30 |           |  |  | LIMCH1       |  |
| V3SVHSHC_5822579  | AKAP8        |  |  | 2.022E-30 |           |  |  | AKAP8        |  |
| V3SVHSHC_7002923  | GYS1         |  |  | 2.146E-30 |           |  |  | GYS1         |  |
| V3SVHSHC_5976260  | OR51A7       |  |  | 3.077E-30 |           |  |  | OR51A7       |  |
| V3SVHSHC_6765092  | MSH5         |  |  | 3.609E-30 |           |  |  | MSH5         |  |
| V3SVHSHC_6453143  | DACT1        |  |  | 3.615E-30 |           |  |  | DACT1        |  |
| V3SVHSHC_9286292  | AMELX        |  |  | 3.755E-30 |           |  |  | AMELX        |  |
| V3SVHSHC_8173961  | ST6GALNAC6   |  |  | 3.866E-30 |           |  |  | ST6GALNAC6   |  |
| V3SVHSHC_8475482  | MARK4        |  |  | 4.087E-30 |           |  |  | MARK4        |  |
| V3SVHSHC_5908907  | ZNF761       |  |  | 4.173E-30 |           |  |  | ZNF761       |  |
| V3SVHSHC_5627153  | ZNF746       |  |  | 4.366E-30 |           |  |  | ZNF746       |  |
| V3SVHSHC_10678595 | PRDM5        |  |  | 5.672E-30 |           |  |  | PRDM5        |  |
| V3SVHSHC_8925107  | SLC25A26     |  |  | 6.190E-30 |           |  |  | SLC25A26     |  |
| V3SVHSHC_6111725  | C2orf49      |  |  | 7.693E-30 |           |  |  | C2orf49      |  |
| V3SVHSHC_6201353  | DGKE         |  |  | 9.660E-30 |           |  |  | DGKE         |  |
| V3SVHSHC_9277844  | SMARCD2      |  |  | 1.062E-29 |           |  |  | SMARCD2      |  |
| V3SVHSHC_5605406  | PCDHB14      |  |  | 1.340E-29 |           |  |  | PCDHB14      |  |
| V3SVHSHC_4645172  | MEX3D        |  |  | 1.845E-29 |           |  |  | MEX3D        |  |
| V3SVHSHC_6308867  | GMIP         |  |  | 1.996E-29 |           |  |  | GMIP         |  |
| V3SVHSHC_9529832  | ZMPSTE24     |  |  | 2.198E-29 |           |  |  | ZMPSTE24     |  |
| V3SVHSHC_7263326  | PAN2         |  |  | 2.778E-29 |           |  |  | PAN2         |  |
| V3SVHSHC_8766443  | CT45A4       |  |  | 2.825E-29 |           |  |  | CT45A4       |  |
| V3SVHSHC_5232341  | PACSLN2      |  |  | 3.068E-29 |           |  |  | PACSLN2      |  |
| V3SVHSHC_6261050  | HGD          |  |  | 3.779E-29 |           |  |  | HGD          |  |
| V3SVHSHC_7449347  | KIF3B        |  |  | 3.782E-29 |           |  |  | KIF3B        |  |
| V3SVHSHC_7814690  | LAMA1        |  |  | 4.427E-29 |           |  |  | LAMA1        |  |

|                   |              |  |  |           |  |  |  |              |  |
|-------------------|--------------|--|--|-----------|--|--|--|--------------|--|
| V3SVHSHC_7520000  | MRPL48       |  |  | 4.523E-29 |  |  |  | MRPL48       |  |
| V3SVHSHC_6397703  | PPP6R1       |  |  | 4.775E-29 |  |  |  | PPP6R1       |  |
| V3SVHSHC_5527955  | R3HDM2       |  |  | 4.874E-29 |  |  |  | R3HDM2       |  |
| V3SVHSHC_5394899  | FAM196B      |  |  | 4.996E-29 |  |  |  | FAM196B      |  |
| V3SVHSHC_5915672  | DEFB104B     |  |  | 6.005E-29 |  |  |  | DEFB104B     |  |
| V3SVHSHC_4854359  | PCSK5        |  |  | 6.488E-29 |  |  |  | PCSK5        |  |
| V3SVHSHC_9940715  | GOLGA6L1     |  |  | 8.515E-29 |  |  |  | GOLGA6L1     |  |
| V3SVHSHC_10414595 | CDH18        |  |  | 1.677E-28 |  |  |  | CDH18        |  |
| V3SVHSHC_5078495  | CLCNKB       |  |  | 1.834E-28 |  |  |  | CLCNKB       |  |
| V3SVHSHC_9120665  | SULT1A3      |  |  | 1.986E-28 |  |  |  | SULT1A3      |  |
| V3SVHSHC_8008565  | SEC61A2      |  |  | 2.449E-28 |  |  |  | SEC61A2      |  |
| V3SVHSHC_9481487  | C21ORF58     |  |  | 2.715E-28 |  |  |  | C21ORF58     |  |
| V3SVHSHC_8408921  | KLHL4        |  |  | 3.161E-28 |  |  |  | KLHL4        |  |
| V3SVHSHC_9000809  | DESI2        |  |  | 3.746E-28 |  |  |  | DESI2        |  |
| V3SVHSHC_8571644  | OR2T29       |  |  | 3.776E-28 |  |  |  | OR2T29       |  |
| V3SVHSHC_5297021  | CD1B         |  |  | 4.812E-28 |  |  |  | CD1B         |  |
| V3SVHSHC_5196701  | LRP11        |  |  | 5.238E-28 |  |  |  | LRP11        |  |
| V3SVHSHC_6358961  | SSR2         |  |  | 5.347E-28 |  |  |  | SSR2         |  |
| V3SVHSHC_9689519  | CD69         |  |  | 5.372E-28 |  |  |  | CD69         |  |
| V3SVHSHC_9681698  | ARSE         |  |  | 6.453E-28 |  |  |  | ARSE         |  |
| V3SVHSHC_5555675  | MAP3K11      |  |  | 1.020E-27 |  |  |  | MAP3K11      |  |
| V3SVHSHC_8107037  | EYS          |  |  | 1.098E-27 |  |  |  | EYS          |  |
| V3SVHSHC_6786707  | NOL11        |  |  | 1.220E-27 |  |  |  | NOL11        |  |
| V3SVHSHC_5907422  | ATP6AP1      |  |  | 1.221E-27 |  |  |  | ATP6AP1      |  |
| V3SVHSHC_10597712 | MAGEA11      |  |  | 1.268E-27 |  |  |  | MAGEA11      |  |
| V3SVHSHC_5862311  | WIZ          |  |  | 1.327E-27 |  |  |  | WIZ          |  |
| V3SVHSHC_7790963  | PTTG1IP      |  |  | 1.733E-27 |  |  |  | PTTG1IP      |  |
| V3SVHSHC_10363907 | HMGN4        |  |  | 1.768E-27 |  |  |  | HMGN4        |  |
| V3SVHSHC_5971772  | SYNE1        |  |  | 1.777E-27 |  |  |  | SYNE1        |  |
| V3SVHSHC_7012691  | NEUROD6      |  |  | 1.856E-27 |  |  |  | NEUROD6      |  |
| V3SVHSHC_7948769  | SYDE2        |  |  | 2.201E-27 |  |  |  | SYDE2        |  |
| V3SVHSHC_9459410  | LOC101927160 |  |  | 2.234E-27 |  |  |  | LOC101927160 |  |
| V3SVHSHC_7784759  | GPR137C      |  |  | 2.252E-27 |  |  |  | GPR137C      |  |
| V3SVHSHC_6956525  | RAB39B       |  |  | 2.284E-27 |  |  |  | RAB39B       |  |
| V3SVHSHC_7174820  | CYB5B        |  |  | 2.522E-27 |  |  |  | CYB5B        |  |
| V3SVHSHC_8827361  | MYH13        |  |  | 2.554E-27 |  |  |  | MYH13        |  |
| V3SVHSHC_4879043  | RAC2         |  |  | 2.813E-27 |  |  |  | RAC2         |  |
| V3SVHSHC_7190693  | Ripply1      |  |  | 2.827E-27 |  |  |  | Ripply1      |  |
| V3SVHSHC_8550392  | TSPAN4       |  |  | 3.256E-27 |  |  |  | TSPAN4       |  |
| V3SVHSHC_8853695  | INADL        |  |  | 3.427E-27 |  |  |  | INADL        |  |
| V3SVHSHC_8007047  | ULK2         |  |  | 3.447E-27 |  |  |  | ULK2         |  |
| V3SVHSHC_6332066  | ZNF747       |  |  | 3.796E-27 |  |  |  | ZNF747       |  |
| V3SVHSHC_7677179  | ZSCAN16      |  |  | 4.114E-27 |  |  |  | ZSCAN16      |  |
| V3SVHSHC_7843037  | TP63         |  |  | 4.310E-27 |  |  |  | TP63         |  |
| V3SVHSHC_7546631  | PIPOX        |  |  | 4.423E-27 |  |  |  | PIPOX        |  |
| V3SVHSHC_5777402  | PBK          |  |  | 4.526E-27 |  |  |  | PBK          |  |
| V3SVHSHC_10115648 | TCF24        |  |  | 5.502E-27 |  |  |  | TCF24        |  |
| V3SVHSHC_5175680  | CA7          |  |  | 5.645E-27 |  |  |  | CA7          |  |
| V3SVHSHC_7916528  | OR4A15       |  |  | 5.711E-27 |  |  |  | OR4A15       |  |
| V3SVHSHC_7204685  | UXS1         |  |  | 5.862E-27 |  |  |  | UXS1         |  |
| V3SVHSHC_8364371  | EFCAB3       |  |  | 6.188E-27 |  |  |  | EFCAB3       |  |
| V3SVHSHC_6813668  | GIMD1        |  |  | 6.623E-27 |  |  |  | GIMD1        |  |

|                   |              |  |  |           |           |  |  |              |  |
|-------------------|--------------|--|--|-----------|-----------|--|--|--------------|--|
| V3SVHSHC_6151325  | ACAP1        |  |  | 7.012E-27 |           |  |  | ACAP1        |  |
| V3SVHSHC_5117138  | DMTN         |  |  | 7.311E-27 |           |  |  | DMTN         |  |
| V3SVHSHC_7832048  | RPS18        |  |  | 8.308E-27 |           |  |  | RPS18        |  |
| V3SVHSHC_5244188  | M6PR         |  |  | 1.065E-26 |           |  |  | M6PR         |  |
| V3SVHSHC_4808291  | Wfdc2        |  |  | 1.291E-26 |           |  |  | Wfdc2        |  |
| V3SVHSHC_6483635  | TLR5         |  |  | 1.301E-26 |           |  |  | TLR5         |  |
| V3SVHSHC_5141294  | SDR16C5      |  |  | 1.404E-26 |           |  |  | SDR16C5      |  |
| V3SVHSHC_10840493 | TRIML1       |  |  | 1.438E-26 |           |  |  | TRIML1       |  |
| V3SVHSHC_7662956  | XKR6         |  |  | 1.462E-26 |           |  |  | XKR6         |  |
| V3SVHSHC_7804691  | SLC25A12     |  |  | 1.562E-26 |           |  |  | SLC25A12     |  |
| V3SVHSHC_5754863  | ZNF417       |  |  | 1.835E-26 |           |  |  | ZNF417       |  |
| V3SVHSHC_8477264  | IQCF1        |  |  | 1.982E-26 |           |  |  | IQCF1        |  |
| V3SVHSHC_5172248  | ST6GALNAC5   |  |  | 2.071E-26 |           |  |  | ST6GALNAC5   |  |
| V3SVHSHC_7293290  | TSPAN17      |  |  | 2.180E-26 |           |  |  | TSPAN17      |  |
| V3SVHSHC_7983122  | SBF2         |  |  | 2.225E-26 |           |  |  | SBF2         |  |
| V3SVHSHC_5108129  | GGT2         |  |  | 2.335E-26 |           |  |  | GGT2         |  |
| V3SVHSHC_4916762  | IGJ          |  |  | 2.604E-26 |           |  |  | IGJ          |  |
| V3SVHSHC_10273553 | CHI3L2       |  |  | 2.635E-26 |           |  |  | CHI3L2       |  |
| V3SVHSHC_6744038  | MYT1         |  |  | 3.329E-26 |           |  |  | MYT1         |  |
| V3SVHSHC_9038132  | H1FX         |  |  | 3.352E-26 |           |  |  | H1FX         |  |
| V3SVHSHC_5338832  | TMEM247      |  |  | 3.445E-26 |           |  |  | TMEM247      |  |
| V3SVHSHC_5907851  | ADAMTS9      |  |  | 3.528E-26 |           |  |  | ADAMTS9      |  |
| V3SVHSHC_9141059  | KCNMB4       |  |  | 3.627E-26 |           |  |  | KCNMB4       |  |
| V3SVHSHC_5360018  | Spg11        |  |  | 3.775E-26 |           |  |  | Spg11        |  |
| V3SVHSHC_8419382  | PITPNB       |  |  | 3.810E-26 |           |  |  | PITPNB       |  |
| V3SVHSHC_9664043  | MAPK15       |  |  | 5.181E-26 | 3.992E-01 |  |  | MAPK15       |  |
| V3SVHSHC_8809376  | SFI1         |  |  | 5.436E-26 |           |  |  | SFI1         |  |
| V3SVHSHC_6046022  | DHPS         |  |  | 5.613E-26 |           |  |  | DHPS         |  |
| V3SVHSHC_9575306  | PSMA1        |  |  | 6.851E-26 |           |  |  | PSMA1        |  |
| V3SVHSHC_5510366  | AEBP2        |  |  | 8.657E-26 |           |  |  | AEBP2        |  |
| V3SVHSHC_8069516  | LOC101927594 |  |  | 9.084E-26 |           |  |  | LOC101927594 |  |
| V3SVHSHC_6146507  | OR4K5        |  |  | 9.152E-26 |           |  |  | OR4K5        |  |
| V3SVHSHC_9123272  | AGK          |  |  | 1.115E-25 |           |  |  | AGK          |  |
| V3SVHSHC_7902569  | CLSPN        |  |  | 1.117E-25 |           |  |  | CLSPN        |  |
| V3SVHSHC_6697541  | EXOSC3       |  |  | 1.189E-25 |           |  |  | EXOSC3       |  |
| V3SVHSHC_7433705  | CCDC166      |  |  | 1.211E-25 |           |  |  | CCDC166      |  |
| V3SVHSHC_10657871 | EGFL6        |  |  | 1.241E-25 |           |  |  | EGFL6        |  |
| V3SVHSHC_10165478 | C6           |  |  | 1.368E-25 |           |  |  | C6           |  |
| V3SVHSHC_5626526  | RCBTB1       |  |  | 1.572E-25 |           |  |  | RCBTB1       |  |
| V3SVHSHC_9418292  | RBMY1J       |  |  | 1.706E-25 |           |  |  | RBMY1J       |  |
| V3SVHSHC_9554384  | MCFD2        |  |  | 1.948E-25 |           |  |  | MCFD2        |  |
| V3SVHSHC_10368461 | GYPC         |  |  | 1.971E-25 |           |  |  | GYPC         |  |
| V3SVHSHC_9795548  | S100A7       |  |  | 2.427E-25 |           |  |  | S100A7       |  |
| V3SVHSHC_8220920  | KIAA1377     |  |  | 2.471E-25 |           |  |  | KIAA1377     |  |
| V3SVHSHC_4772321  | STAG1        |  |  | 2.573E-25 |           |  |  | STAG1        |  |
| V3SVHSHC_7569830  | ATRX         |  |  | 2.626E-25 |           |  |  | ATRX         |  |
| V3SVHSHC_7547621  | FSCB         |  |  | 2.848E-25 |           |  |  | FSCB         |  |
| V3SVHSHC_8262797  | CCM2L        |  |  | 3.124E-25 |           |  |  | CCM2L        |  |
| V3SVHSHC_10714565 | MFSD6        |  |  | 3.200E-25 |           |  |  | MFSD6        |  |
| V3SVHSHC_6236663  | STK38L       |  |  | 3.286E-25 |           |  |  | STK38L       |  |
| V3SVHSHC_7801424  | FGL2         |  |  | 3.401E-25 |           |  |  | FGL2         |  |
| V3SVHSHC_7393049  | CD1E         |  |  | 3.639E-25 |           |  |  | CD1E         |  |
| V3SVHSHC_8869106  | OR2A5        |  |  | 3.738E-25 |           |  |  | OR2A5        |  |

|                   |              |  |  |           |           |  |  |              |  |
|-------------------|--------------|--|--|-----------|-----------|--|--|--------------|--|
| V3SVHSHC_7098128  | COX20        |  |  | 3.753E-25 |           |  |  | COX20        |  |
| V3SVHSHC_10499603 | HSD11B1      |  |  | 3.942E-25 |           |  |  | HSD11B1      |  |
| V3SVHSHC_8358266  | MLXIP        |  |  | 3.974E-25 |           |  |  | MLXIP        |  |
| V3SVHSHC_8317247  | CSH2         |  |  | 4.171E-25 |           |  |  | CSH2         |  |
| V3SVHSHC_5616296  | SMYD2        |  |  | 4.966E-25 |           |  |  | SMYD2        |  |
| V3SVHSHC_4911647  | MSC          |  |  | 5.007E-25 |           |  |  | MSC          |  |
| V3SVHSHC_8328467  | KDM1B        |  |  | 5.042E-25 |           |  |  | KDM1B        |  |
| V3SVHSHC_6231020  | ORAI3        |  |  | 5.573E-25 |           |  |  | ORAI3        |  |
| V3SVHSHC_7610090  | PPP2R5A      |  |  | 5.642E-25 |           |  |  | PPP2R5A      |  |
| V3SVHSHC_6836372  | AVL9         |  |  | 5.944E-25 |           |  |  | AVL9         |  |
| V3SVHSHC_9612926  | Krtap21-1    |  |  | 6.100E-25 |           |  |  | Krtap21-1    |  |
| V3SVHSHC_5404535  | ELMOD2       |  |  | 7.348E-25 |           |  |  | ELMOD2       |  |
| V3SVHSHC_5266199  | SMARCA5      |  |  | 7.690E-25 |           |  |  | SMARCA5      |  |
| V3SVHSHC_10710737 | POMC         |  |  | 8.583E-25 |           |  |  | POMC         |  |
| V3SVHSHC_8602037  | BAGE         |  |  | 8.766E-25 |           |  |  | BAGE         |  |
| V3SVHSHC_7905572  | GCNT3        |  |  | 8.861E-25 |           |  |  | GCNT3        |  |
| V3SVHSHC_9177194  | LCN8         |  |  | 9.119E-25 |           |  |  | LCN8         |  |
| V3SVHSHC_7394798  | LOC100506922 |  |  | 9.456E-25 |           |  |  | LOC100506922 |  |
| V3SVHSHC_5864819  | Asprv1       |  |  | 9.620E-25 |           |  |  | Asprv1       |  |
| V3SVHSHC_7502576  | SLC25A11     |  |  | 1.065E-24 |           |  |  | SLC25A11     |  |
| V3SVHSHC_9621308  | GPATCH11     |  |  | 1.127E-24 |           |  |  | GPATCH11     |  |
| V3SVHSHC_10467527 | ADCY4        |  |  | 1.164E-24 |           |  |  | ADCY4        |  |
| V3SVHSHC_9932498  | CYP26A1      |  |  | 1.250E-24 |           |  |  | CYP26A1      |  |
| V3SVHSHC_8642165  | LINGO4       |  |  | 1.321E-24 |           |  |  | LINGO4       |  |
| V3SVHSHC_10600946 | ARF4         |  |  | 1.375E-24 |           |  |  | ARF4         |  |
| V3SVHSHC_8214320  | PCDH11Y      |  |  | 1.392E-24 |           |  |  | PCDH11Y      |  |
| V3SVHSHC_7177823  | ZNF461       |  |  | 1.461E-24 |           |  |  | ZNF461       |  |
| V3SVHSHC_7540955  | CARD18       |  |  | 1.536E-24 |           |  |  | CARD18       |  |
| V3SVHSHC_9427202  | C5orf51      |  |  | 1.608E-24 |           |  |  | C5orf51      |  |
| V3SVHSHC_4812977  | ICOSLG       |  |  | 1.616E-24 |           |  |  | ICOSLG       |  |
| V3SVHSHC_10437860 | HK2          |  |  | 1.916E-24 |           |  |  | HK2          |  |
| V3SVHSHC_5875808  | Rnf217       |  |  | 2.006E-24 |           |  |  | Rnf217       |  |
| V3SVHSHC_8919695  | PRAMEF19     |  |  | 2.210E-24 |           |  |  | PRAMEF19     |  |
| V3SVHSHC_10712915 | SERPINB13    |  |  | 2.380E-24 |           |  |  | SERPINB13    |  |
| V3SVHSHC_7799411  | TESK2        |  |  | 2.440E-24 |           |  |  | TESK2        |  |
| V3SVHSHC_8122481  | DERA         |  |  | 2.483E-24 |           |  |  | DERA         |  |
| V3SVHSHC_7534685  | HADHA        |  |  | 2.714E-24 |           |  |  | HADHA        |  |
| V3SVHSHC_8307842  | Tmem237      |  |  | 2.900E-24 |           |  |  | Tmem237      |  |
| V3SVHSHC_5231978  | LYRM9        |  |  | 3.096E-24 |           |  |  | LYRM9        |  |
| V3SVHSHC_9075653  | PBXIP1       |  |  | 3.264E-24 |           |  |  | PBXIP1       |  |
| V3SVHSHC_6796772  | SLC2A14      |  |  | 4.074E-24 |           |  |  | SLC2A14      |  |
| V3SVHSHC_9153566  | MISP         |  |  | 4.583E-24 |           |  |  | MISP         |  |
| V3SVHSHC_4915244  | DAPK2        |  |  | 4.605E-24 |           |  |  | DAPK2        |  |
| V3SVHSHC_8563988  | TCF7L2       |  |  | 4.635E-24 |           |  |  | TCF7L2       |  |
| V3SVHSHC_10711265 | VIPAS39      |  |  | 4.665E-24 |           |  |  | VIPAS39      |  |
| V3SVHSHC_6749285  | SLC17A6      |  |  | 5.140E-24 |           |  |  | SLC17A6      |  |
| V3SVHSHC_8583128  | IL4          |  |  | 5.292E-24 |           |  |  | IL4          |  |
| V3SVHSHC_6986621  | LOC388813    |  |  | 5.461E-24 |           |  |  | LOC388813    |  |
| V3SVHSHC_5257619  | CTBS         |  |  | 6.064E-24 |           |  |  | CTBS         |  |
| V3SVHSHC_6086480  | A4GNT        |  |  | 6.130E-24 | 6.790E-02 |  |  | A4GNT        |  |

|                   |              |  |  |           |           |  |  |              |          |
|-------------------|--------------|--|--|-----------|-----------|--|--|--------------|----------|
| V3SVHSHC_9601409  | EFHC1        |  |  | 6.367E-24 |           |  |  | EFHC1        |          |
| V3SVHSHC_6819509  | MRRF         |  |  | 6.393E-24 |           |  |  | MRRF         |          |
| V3SVHSHC_9290945  | OPLAH        |  |  | 6.600E-24 |           |  |  | OPLAH        |          |
| V3SVHSHC_7123802  | ALDOB        |  |  | 6.645E-24 |           |  |  | ALDOB        |          |
| V3SVHSHC_6298175  | C10ORF11     |  |  | 7.308E-24 |           |  |  | C10ORF11     |          |
| V3SVHSHC_6002924  | GTF2H3       |  |  | 8.207E-24 |           |  |  | GTF2H3       |          |
| V3SVHSHC_9857819  | MAS1         |  |  | 8.356E-24 |           |  |  | MAS1         |          |
| V3SVHSHC_7113011  | BTLA         |  |  | 8.716E-24 |           |  |  | BTLA         |          |
| V3SVHSHC_7644047  | GPR116       |  |  | 9.071E-24 |           |  |  | GPR116       |          |
| V3SVHSHC_5272139  | MADD         |  |  | 9.089E-24 |           |  |  | MADD         |          |
| V3SVHSHC_5379092  | TMEM45B      |  |  | 9.235E-24 |           |  |  | TMEM45B      |          |
| V3SVHSHC_10222040 | PCSK1        |  |  | 9.320E-24 |           |  |  | PCSK1        |          |
| V3SVHSHC_6672626  | GALNT18      |  |  | 9.685E-24 |           |  |  | GALNT18      |          |
| V3SVHSHC_6718661  | CLEC2L       |  |  | 1.026E-23 |           |  |  | CLEC2L       |          |
| V3SVHSHC_8974772  | TIMM9        |  |  | 1.074E-23 |           |  |  | TIMM9        |          |
| V3SVHSHC_7816043  | LOC101929578 |  |  | 1.159E-23 |           |  |  | LOC101929578 |          |
| V3SVHSHC_7794494  | ALKBH5       |  |  | 1.339E-23 |           |  |  | ALKBH5       |          |
| V3SVHSHC_4775819  | STK36        |  |  | 1.367E-23 |           |  |  | STK36        |          |
| V3SVHSHC_10628105 | SLC4A1       |  |  | 1.438E-23 |           |  |  | SLC4A1       |          |
| V3SVHSHC_5572670  | FAT3         |  |  | 1.518E-23 |           |  |  | FAT3         |          |
| V3SVHSHC_9438521  | OR2F2        |  |  | 1.612E-23 |           |  |  | OR2F2        |          |
| V3SVHSHC_10351829 | CIB3         |  |  | 1.736E-23 | 4.221E-01 |  |  | CIB3         |          |
| V3SVHSHC_10613915 | WFIKK1       |  |  | 1.899E-23 |           |  |  | WFIKK1       |          |
| V3SVHSHC_5762189  | RBM43        |  |  | 1.906E-23 |           |  |  | RBM43        |          |
| V3SVHSHC_10686845 | SPSB2        |  |  | 1.959E-23 |           |  |  | SPSB2        |          |
| V3SVHSHC_6672527  | RNF125       |  |  | 2.087E-23 |           |  |  | RNF125       |          |
| V3SVHSHC_5053118  | LAMA5        |  |  | 2.216E-23 |           |  |  | LAMA5        |          |
| V3SVHSHC_8431559  | MAST3        |  |  | 2.227E-23 |           |  |  | MAST3        |          |
| V3SVHSHC_6481985  | ABCC12       |  |  | 2.434E-23 |           |  |  | ABCC12       |          |
| V3SVHSHC_5212739  | ARHGAP19     |  |  | 2.567E-23 |           |  |  | ARHGAP19     |          |
| V3SVHSHC_9703610  | Hbq1         |  |  | 2.609E-23 |           |  |  | Hbq1         |          |
| V3SVHSHC_9565538  | PRIMPOL      |  |  | 2.621E-23 | 7.416E-02 |  |  | PRIMPOL      |          |
| V3SVHSHC_6506471  | CPXM2        |  |  | 2.686E-23 |           |  |  | CPXM2        |          |
| V3SVHSHC_7568708  | AKT2         |  |  | 2.713E-23 |           |  |  | AKT2         |          |
| V3SVHSHC_6114695  | ARHGAP6      |  |  | 2.718E-23 |           |  |  | ARHGAP6      |          |
| V3SVHSHC_6750209  | MTG1         |  |  | 2.774E-23 |           |  |  | MTG1         |          |
| V3SVHSHC_8476208  | KIAA0895     |  |  | 2.909E-23 | 3.242E-17 |  |  | KIAA0895     | KIAA0895 |
| V3SVHSHC_9876134  | CHPT1        |  |  | 2.942E-23 |           |  |  | CHPT1        |          |
| V3SVHSHC_8193134  | NOL10        |  |  | 2.953E-23 | 3.685E-01 |  |  | NOL10        |          |
| V3SVHSHC_9953123  | GSG2         |  |  | 3.528E-23 |           |  |  | GSG2         |          |
| V3SVHSHC_7080968  | INMT         |  |  | 3.567E-23 |           |  |  | INMT         |          |
| V3SVHSHC_6436016  | SUMF1        |  |  | 3.673E-23 |           |  |  | SUMF1        |          |
| V3SVHSHC_5882243  | RPL28        |  |  | 4.128E-23 |           |  |  | RPL28        |          |
| V3SVHSHC_10440500 | NCAM2        |  |  | 4.280E-23 |           |  |  | NCAM2        |          |
| V3SVHSHC_5438525  | SEH1L        |  |  | 4.339E-23 | 1.635E-11 |  |  | SEH1L        | SEH1L    |
| V3SVHSHC_10815578 | ATCAY        |  |  | 4.353E-23 |           |  |  | ATCAY        |          |
| V3SVHSHC_8502113  | SESN2        |  |  | 4.937E-23 |           |  |  | SESN2        |          |
| V3SVHSHC_6374966  | CCDC90B      |  |  | 4.966E-23 |           |  |  | CCDC90B      |          |
| V3SVHSHC_5194490  | CLDND1       |  |  | 5.004E-23 |           |  |  | CLDND1       |          |
| V3SVHSHC_9884054  | ANKRD23      |  |  | 5.028E-23 |           |  |  | ANKRD23      |          |
| V3SVHSHC_7114067  | FADS6        |  |  | 5.101E-23 |           |  |  | FADS6        |          |
| V3SVHSHC_9164357  | AADAC        |  |  | 5.121E-23 |           |  |  | AADAC        |          |

|                   |              |  |  |           |           |  |  |  |              |          |
|-------------------|--------------|--|--|-----------|-----------|--|--|--|--------------|----------|
| V3SVHSHC_5434070  | COG3         |  |  | 5.147E-23 |           |  |  |  | COG3         |          |
| V3SVHSHC_10744298 | ARHGEF25     |  |  | 5.962E-23 |           |  |  |  | ARHGEF25     |          |
| V3SVHSHC_7861550  | OR56A5       |  |  | 6.135E-23 |           |  |  |  | OR56A5       |          |
| V3SVHSHC_6347774  | USP43        |  |  | 6.332E-23 |           |  |  |  | USP43        |          |
| V3SVHSHC_6099185  | SULT4A1      |  |  | 6.875E-23 | 5.202E-20 |  |  |  | SULT4A1      | SULT4A1  |
| V3SVHSHC_7858019  | TFPT         |  |  | 7.032E-23 |           |  |  |  | TFPT         |          |
| V3SVHSHC_10685360 | FGF10        |  |  | 7.072E-23 |           |  |  |  | FGF10        |          |
| V3SVHSHC_7405292  | ARRDC3       |  |  | 7.119E-23 |           |  |  |  | ARRDC3       |          |
| V3SVHSHC_5492084  | FCHSD2       |  |  | 8.179E-23 |           |  |  |  | FCHSD2       |          |
| V3SVHSHC_9132116  | LOC101930479 |  |  | 8.727E-23 |           |  |  |  | LOC101930479 |          |
| V3SVHSHC_6479939  | Ptpmt1       |  |  | 8.935E-23 |           |  |  |  | Ptpmt1       |          |
| V3SVHSHC_5401268  | MTAP         |  |  | 8.960E-23 |           |  |  |  | MTAP         |          |
| V3SVHSHC_8032952  | PECR         |  |  | 9.228E-23 |           |  |  |  | PECR         |          |
| V3SVHSHC_9705623  | SAMSN1       |  |  | 9.710E-23 |           |  |  |  | SAMSN1       |          |
| V3SVHSHC_4797071  | STEAP3       |  |  | 9.994E-23 |           |  |  |  | STEAP3       |          |
| V3SVHSHC_8731760  | LRRTM2       |  |  | 1.079E-22 |           |  |  |  | LRRTM2       |          |
| V3SVHSHC_8399714  | ZNF22        |  |  | 1.090E-22 |           |  |  |  | ZNF22        |          |
| V3SVHSHC_7409549  | NSRP1        |  |  | 1.143E-22 |           |  |  |  | NSRP1        |          |
| V3SVHSHC_6049751  | ZFP36        |  |  | 1.203E-22 |           |  |  |  | ZFP36        |          |
| V3SVHSHC_7812083  | CEBPD        |  |  | 1.260E-22 |           |  |  |  | CEBPD        |          |
| V3SVHSHC_9572765  | ANKRD20A2    |  |  | 1.313E-22 |           |  |  |  | ANKRD20A2    |          |
| V3SVHSHC_5458721  | OR5AN1       |  |  | 1.457E-22 |           |  |  |  | OR5AN1       |          |
| V3SVHSHC_7792712  | C9ORF9       |  |  | 1.533E-22 |           |  |  |  | C9ORF9       |          |
| V3SVHSHC_6442484  | SLC2A3       |  |  | 1.878E-22 |           |  |  |  | SLC2A3       |          |
| V3SVHSHC_8345396  | THBS2        |  |  | 2.105E-22 |           |  |  |  | THBS2        |          |
| V3SVHSHC_9726809  | ASXL3        |  |  | 2.110E-22 |           |  |  |  | ASXL3        |          |
| V3SVHSHC_10416146 | PRDM13       |  |  | 2.181E-22 |           |  |  |  | PRDM13       |          |
| V3SVHSHC_7672229  | GTF3A        |  |  | 2.298E-22 |           |  |  |  | GTF3A        |          |
| V3SVHSHC_6159080  | TRAPPC12     |  |  | 2.309E-22 |           |  |  |  | TRAPPC12     |          |
| V3SVHSHC_4855745  | PIK3R4       |  |  | 2.345E-22 |           |  |  |  | PIK3R4       |          |
| V3SVHSHC_6717341  | FAM53B       |  |  | 2.369E-22 |           |  |  |  | FAM53B       |          |
| V3SVHSHC_5005961  | SH3YL1       |  |  | 2.420E-22 |           |  |  |  | SH3YL1       |          |
| V3SVHSHC_10816106 | AGL          |  |  | 2.596E-22 |           |  |  |  | AGL          |          |
| V3SVHSHC_10387073 | TRIML1       |  |  | 2.611E-22 |           |  |  |  | TRIML1       |          |
| V3SVHSHC_6436280  | FMO5         |  |  | 2.730E-22 |           |  |  |  | FMO5         |          |
| V3SVHSHC_8277713  | C12orf40     |  |  | 2.765E-22 | 1.008E-12 |  |  |  | C12orf40     | C12orf40 |
| V3SVHSHC_6175118  | C15orf61     |  |  | 3.125E-22 |           |  |  |  | C15orf61     |          |
| V3SVHSHC_6460634  | SYF2         |  |  | 3.175E-22 |           |  |  |  | SYF2         |          |
| V3SVHSHC_7135649  | RLN3         |  |  | 3.377E-22 |           |  |  |  | RLN3         |          |
| V3SVHSHC_8400902  | PRPH         |  |  | 3.734E-22 |           |  |  |  | PRPH         |          |
| V3SVHSHC_9789542  | PAGE4        |  |  | 3.903E-22 |           |  |  |  | PAGE4        |          |
| V3SVHSHC_4739024  | MLLT4        |  |  | 3.908E-22 |           |  |  |  | MLLT4        |          |
| V3SVHSHC_8362622  | THG1L        |  |  | 4.186E-22 |           |  |  |  | THG1L        |          |
| V3SVHSHC_8223461  | COA1         |  |  | 4.353E-22 |           |  |  |  | COA1         |          |
| V3SVHSHC_6169277  | GOT1L1       |  |  | 4.353E-22 |           |  |  |  | GOT1L1       |          |
| V3SVHSHC_8129510  | SMG1         |  |  | 4.671E-22 |           |  |  |  | SMG1         |          |
| V3SVHSHC_7550129  | INTS10       |  |  | 5.031E-22 |           |  |  |  | INTS10       |          |
| V3SVHSHC_9232568  | PPP1R9B      |  |  | 5.278E-22 |           |  |  |  | PPP1R9B      |          |
| V3SVHSHC_10125845 | TWF2         |  |  | 5.382E-22 |           |  |  |  | TWF2         |          |
| V3SVHSHC_9102779  | TAF10        |  |  | 5.467E-22 |           |  |  |  | TAF10        |          |
| V3SVHSHC_5692625  | SLC17A8      |  |  | 5.606E-22 |           |  |  |  | SLC17A8      |          |

|                   |              |  |  |           |           |  |  |              |  |
|-------------------|--------------|--|--|-----------|-----------|--|--|--------------|--|
| V3SVHSHC_8551547  | TDG          |  |  | 5.642E-22 |           |  |  | TDG          |  |
| V3SVHSHC_4929434  | ADPRH        |  |  | 5.666E-22 |           |  |  | ADPRH        |  |
| V3SVHSHC_8929001  | COL7A1       |  |  | 5.837E-22 |           |  |  | COL7A1       |  |
| V3SVHSHC_4885808  | RGS13        |  |  | 6.739E-22 |           |  |  | RGS13        |  |
| V3SVHSHC_10035557 | TPPP         |  |  | 6.835E-22 |           |  |  | TPPP         |  |
| V3SVHSHC_10029980 | POTEC        |  |  | 6.835E-22 |           |  |  | POTEC        |  |
| V3SVHSHC_5518418  | NHP2L1       |  |  | 7.186E-22 |           |  |  | NHP2L1       |  |
| V3SVHSHC_5744996  | SULT1C2      |  |  | 7.203E-22 |           |  |  | SULT1C2      |  |
| V3SVHSHC_8148881  | CUL5         |  |  | 7.503E-22 |           |  |  | CUL5         |  |
| V3SVHSHC_9900752  | RTN4RL1      |  |  | 7.621E-22 |           |  |  | RTN4RL1      |  |
| V3SVHSHC_8063147  | CSGALNACT2   |  |  | 7.761E-22 |           |  |  | CSGALNACT2   |  |
| V3SVHSHC_8500100  | FAM156A      |  |  | 8.170E-22 |           |  |  | FAM156A      |  |
| V3SVHSHC_10719713 | CLDN19       |  |  | 9.600E-22 |           |  |  | CLDN19       |  |
| V3SVHSHC_5953721  | METTL21B     |  |  | 9.760E-22 |           |  |  | METTL21B     |  |
| V3SVHSHC_8589662  | CECR1        |  |  | 9.877E-22 |           |  |  | CECR1        |  |
| V3SVHSHC_6724271  | SERPINB2     |  |  | 1.069E-21 |           |  |  | SERPINB2     |  |
| V3SVHSHC_9333350  | PCDHGA10     |  |  | 1.094E-21 |           |  |  | PCDHGA10     |  |
| V3SVHSHC_6748031  | RAB9A        |  |  | 1.142E-21 |           |  |  | RAB9A        |  |
| V3SVHSHC_6453011  | NT5M         |  |  | 1.270E-21 |           |  |  | NT5M         |  |
| V3SVHSHC_9175082  | ZNF19        |  |  | 1.280E-21 |           |  |  | ZNF19        |  |
| V3SVHSHC_8548280  | PRKD3        |  |  | 1.293E-21 |           |  |  | PRKD3        |  |
| V3SVHSHC_10521713 | ZNF410       |  |  | 1.297E-21 |           |  |  | ZNF410       |  |
| V3SVHSHC_10566527 | LOC101927375 |  |  | 1.315E-21 |           |  |  | LOC101927375 |  |
| V3SVHSHC_5470469  | NIPSNAP3A    |  |  | 1.338E-21 | 3.322E-02 |  |  | NIPSNAP3A    |  |
| V3SVHSHC_7374800  | SH3GL3       |  |  | 1.421E-21 |           |  |  | SH3GL3       |  |
| V3SVHSHC_7307777  | ZNF276       |  |  | 1.577E-21 |           |  |  | ZNF276       |  |
| V3SVHSHC_7423739  | SLC38A8      |  |  | 1.677E-21 |           |  |  | SLC38A8      |  |
| V3SVHSHC_6585440  | SYNJ2        |  |  | 1.751E-21 |           |  |  | SYNJ2        |  |
| V3SVHSHC_5375825  | MAPK8IP2     |  |  | 1.809E-21 |           |  |  | MAPK8IP2     |  |
| V3SVHSHC_8332757  | CPA3         |  |  | 2.198E-21 |           |  |  | CPA3         |  |
| V3SVHSHC_7255571  | YIF1A        |  |  | 2.265E-21 |           |  |  | YIF1A        |  |
| V3SVHSHC_9189998  | MAMDC4       |  |  | 2.414E-21 |           |  |  | MAMDC4       |  |
| V3SVHSHC_6369719  | MAPK1        |  |  | 2.507E-21 |           |  |  | MAPK1        |  |
| V3SVHSHC_8182145  | SLC33A1      |  |  | 2.517E-21 |           |  |  | SLC33A1      |  |
| V3SVHSHC_5423510  | Bpifb6       |  |  | 2.719E-21 |           |  |  | Bpifb6       |  |
| V3SVHSHC_6807398  | NMS          |  |  | 2.813E-21 |           |  |  | NMS          |  |
| V3SVHSHC_6737207  | EIF4A1       |  |  | 2.937E-21 |           |  |  | EIF4A1       |  |
| V3SVHSHC_6198878  | CYB5D1       |  |  | 2.947E-21 |           |  |  | CYB5D1       |  |
| V3SVHSHC_6642233  | TEAD2        |  |  | 2.970E-21 |           |  |  | TEAD2        |  |
| V3SVHSHC_5088725  | ZNF250       |  |  | 3.009E-21 |           |  |  | ZNF250       |  |
| V3SVHSHC_5637977  | MRPL53       |  |  | 3.216E-21 |           |  |  | MRPL53       |  |
| V3SVHSHC_6843995  | ACSF3        |  |  | 3.412E-21 |           |  |  | ACSF3        |  |
| V3SVHSHC_8225870  | TIFA         |  |  | 3.420E-21 |           |  |  | TIFA         |  |
| V3SVHSHC_5848484  | TRMT13       |  |  | 3.445E-21 |           |  |  | TRMT13       |  |
| V3SVHSHC_8568806  | ZSWIM8       |  |  | 3.727E-21 |           |  |  | ZSWIM8       |  |
| V3SVHSHC_4780373  | Mageb17      |  |  | 3.740E-21 |           |  |  | Mageb17      |  |
| V3SVHSHC_9490958  | PRKAG2       |  |  | 3.815E-21 |           |  |  | PRKAG2       |  |
| V3SVHSHC_9585206  | HOXA13       |  |  | 4.150E-21 |           |  |  | HOXA13       |  |
| V3SVHSHC_10653152 | POLD3        |  |  | 4.757E-21 |           |  |  | POLD3        |  |
| V3SVHSHC_5618705  | CRNN         |  |  | 4.943E-21 |           |  |  | CRNN         |  |

|                   |           |  |  |           |           |  |  |           |  |
|-------------------|-----------|--|--|-----------|-----------|--|--|-----------|--|
| V3SVHSHC_10010015 | MICAL1    |  |  | 5.146E-21 |           |  |  | MICAL1    |  |
| V3SVHSHC_6769349  | C9ORF84   |  |  | 5.541E-21 |           |  |  | C9ORF84   |  |
| V3SVHSHC_6859439  | CSNK1A1   |  |  | 5.620E-21 |           |  |  | CSNK1A1   |  |
| V3SVHSHC_7836998  | UGT2B10   |  |  | 5.690E-21 |           |  |  | UGT2B10   |  |
| V3SVHSHC_6658370  | GNGT2     |  |  | 6.579E-21 |           |  |  | GNGT2     |  |
| V3SVHSHC_4721831  | TCEB3     |  |  | 6.729E-21 |           |  |  | TCEB3     |  |
| V3SVHSHC_6252866  | C8orf76   |  |  | 6.768E-21 |           |  |  | C8orf76   |  |
| V3SVHSHC_7712918  | VPS53     |  |  | 7.183E-21 |           |  |  | VPS53     |  |
| V3SVHSHC_6432980  | PARVA     |  |  | 7.549E-21 |           |  |  | PARVA     |  |
| V3SVHSHC_9912203  | IQGAP3    |  |  | 7.772E-21 |           |  |  | IQGAP3    |  |
| V3SVHSHC_7254713  | PSMC3     |  |  | 7.893E-21 |           |  |  | PSMC3     |  |
| V3SVHSHC_4908314  | FAM163A   |  |  | 7.927E-21 |           |  |  | FAM163A   |  |
| V3SVHSHC_5526866  | INPP5A    |  |  | 8.298E-21 |           |  |  | INPP5A    |  |
| V3SVHSHC_4799843  | ZAK       |  |  | 8.481E-21 |           |  |  | ZAK       |  |
| V3SVHSHC_7589003  | GHSR      |  |  | 9.183E-21 |           |  |  | GHSR      |  |
| V3SVHSHC_6044504  | DNASE2B   |  |  | 9.258E-21 |           |  |  | DNASE2B   |  |
| V3SVHSHC_6134825  | CFL1      |  |  | 9.537E-21 |           |  |  | CFL1      |  |
| V3SVHSHC_5847362  | DDO       |  |  | 9.546E-21 |           |  |  | DDO       |  |
| V3SVHSHC_10365722 | TMEM144   |  |  | 9.763E-21 |           |  |  | TMEM144   |  |
| V3SVHSHC_9712025  | KIAA1456  |  |  | 1.031E-20 |           |  |  | KIAA1456  |  |
| V3SVHSHC_7074005  | RNASE7    |  |  | 1.068E-20 |           |  |  | RNASE7    |  |
| V3SVHSHC_4637384  | GALNT11   |  |  | 1.082E-20 |           |  |  | GALNT11   |  |
| V3SVHSHC_5273822  | HUS1      |  |  | 1.114E-20 | 7.343E-02 |  |  | HUS1      |  |
| V3SVHSHC_10669751 | IFRD1     |  |  | 1.116E-20 |           |  |  | IFRD1     |  |
| V3SVHSHC_9363116  | SLC36A2   |  |  | 1.148E-20 |           |  |  | SLC36A2   |  |
| V3SVHSHC_5648735  | LPHN1     |  |  | 1.157E-20 |           |  |  | LPHN1     |  |
| V3SVHSHC_5090342  | DGCR14    |  |  | 1.167E-20 |           |  |  | DGCR14    |  |
| V3SVHSHC_4899008  | LRRRC8B   |  |  | 1.176E-20 |           |  |  | LRRRC8B   |  |
| V3SVHSHC_7002527  | SLC5A4    |  |  | 1.203E-20 |           |  |  | SLC5A4    |  |
| V3SVHSHC_10594412 | C17orf98  |  |  | 1.259E-20 |           |  |  | C17orf98  |  |
| V3SVHSHC_7209437  | UBTD1     |  |  | 1.266E-20 |           |  |  | UBTD1     |  |
| V3SVHSHC_5695859  | MKRN3     |  |  | 1.271E-20 |           |  |  | MKRN3     |  |
| V3SVHSHC_7711994  | DEFB127   |  |  | 1.300E-20 |           |  |  | DEFB127   |  |
| V3SVHSHC_7144328  | SLCO1B1   |  |  | 1.429E-20 |           |  |  | SLCO1B1   |  |
| V3SVHSHC_7013054  | RILPL2    |  |  | 1.507E-20 |           |  |  | RILPL2    |  |
| V3SVHSHC_6708827  | AOC3      |  |  | 1.522E-20 |           |  |  | AOC3      |  |
| V3SVHSHC_4663553  | PPM1H     |  |  | 1.646E-20 |           |  |  | PPM1H     |  |
| V3SVHSHC_6429416  | RPL10L    |  |  | 1.688E-20 |           |  |  | RPL10L    |  |
| V3SVHSHC_4989527  | LIN9      |  |  | 1.736E-20 |           |  |  | LIN9      |  |
| V3SVHSHC_5538614  | AGBL4     |  |  | 1.781E-20 |           |  |  | AGBL4     |  |
| V3SVHSHC_6708926  | OR52H1    |  |  | 1.842E-20 |           |  |  | OR52H1    |  |
| V3SVHSHC_7873001  | CYP2C18   |  |  | 2.008E-20 |           |  |  | CYP2C18   |  |
| V3SVHSHC_5524820  | TMPRSS11B |  |  | 2.019E-20 |           |  |  | TMPRSS11B |  |
| V3SVHSHC_10237022 | ASS1      |  |  | 2.028E-20 |           |  |  | ASS1      |  |
| V3SVHSHC_8436872  | ZMYND15   |  |  | 2.037E-20 |           |  |  | ZMYND15   |  |
| V3SVHSHC_9948437  | KRTAP2-3  |  |  | 2.040E-20 |           |  |  | KRTAP2-3  |  |
| V3SVHSHC_10778255 | HSPA1B    |  |  | 2.087E-20 |           |  |  | HSPA1B    |  |
| V3SVHSHC_7470269  | Gen1      |  |  | 2.153E-20 |           |  |  | Gen1      |  |
| V3SVHSHC_4815320  | OR4S2     |  |  | 2.227E-20 |           |  |  | OR4S2     |  |
| V3SVHSHC_8906396  | CASQ1     |  |  | 2.240E-20 |           |  |  | CASQ1     |  |
| V3SVHSHC_4964282  | TMEM79    |  |  | 2.262E-20 |           |  |  | TMEM79    |  |
| V3SVHSHC_8392256  | APH1B     |  |  | 2.332E-20 |           |  |  | APH1B     |  |
| V3SVHSHC_9353843  | STK11     |  |  | 2.369E-20 |           |  |  | STK11     |  |
| V3SVHSHC_7827593  | HMGCL     |  |  | 2.463E-20 |           |  |  | HMGCL     |  |



|                   |           |  |  |           |           |  |  |  |           |       |
|-------------------|-----------|--|--|-----------|-----------|--|--|--|-----------|-------|
| V3SVHSHC_9382190  | Adat3     |  |  | 2.565E-20 |           |  |  |  | Adat3     |       |
| V3SVHSHC_7940783  | LPAR4     |  |  | 2.590E-20 |           |  |  |  | LPAR4     |       |
| V3SVHSHC_7679423  | MS4A1     |  |  | 2.645E-20 |           |  |  |  | MS4A1     |       |
| V3SVHSHC_9662228  | NT5C1B    |  |  | 2.765E-20 |           |  |  |  | NT5C1B    |       |
| V3SVHSHC_8839538  | OR8D1     |  |  | 2.784E-20 | 5.701E-21 |  |  |  | OR8D1     | OR8D1 |
| V3SVHSHC_8970548  | DNASE1L3  |  |  | 2.804E-20 |           |  |  |  | DNASE1L3  |       |
| V3SVHSHC_9246197  | SULT2A1   |  |  | 2.893E-20 |           |  |  |  | SULT2A1   |       |
| V3SVHSHC_9073640  | NTNG2     |  |  | 3.244E-20 |           |  |  |  | NTNG2     |       |
| V3SVHSHC_6699653  | MUC21     |  |  | 3.318E-20 |           |  |  |  | MUC21     |       |
| V3SVHSHC_7808849  | RPS6KC1   |  |  | 3.376E-20 |           |  |  |  | RPS6KC1   |       |
| V3SVHSHC_8437730  | KRTAP12-4 |  |  | 3.633E-20 |           |  |  |  | KRTAP12-4 |       |
| V3SVHSHC_7365329  | ATOH7     |  |  | 3.662E-20 |           |  |  |  | ATOH7     |       |
| V3SVHSHC_9772646  | SETD6     |  |  | 3.684E-20 |           |  |  |  | SETD6     |       |
| V3SVHSHC_10006088 | DAZAP2    |  |  | 3.790E-20 |           |  |  |  | DAZAP2    |       |
| V3SVHSHC_9155744  | BUB1B     |  |  | 3.873E-20 |           |  |  |  | BUB1B     |       |
| V3SVHSHC_7913690  | CTSF      |  |  | 3.935E-20 |           |  |  |  | CTSF      |       |
| V3SVHSHC_8462282  | TARDBP    |  |  | 3.971E-20 |           |  |  |  | TARDBP    |       |
| V3SVHSHC_8971010  | TBX5      |  |  | 4.149E-20 |           |  |  |  | TBX5      |       |
| V3SVHSHC_5100539  | CCDC68    |  |  | 4.264E-20 |           |  |  |  | CCDC68    |       |
| V3SVHSHC_8835248  | CLEC3A    |  |  | 4.360E-20 |           |  |  |  | CLEC3A    |       |
| V3SVHSHC_5204126  | ZNF292    |  |  | 4.487E-20 |           |  |  |  | ZNF292    |       |
| V3SVHSHC_8175677  | GOLGA6L3  |  |  | 4.515E-20 |           |  |  |  | GOLGA6L3  |       |
| V3SVHSHC_7895870  | C1S       |  |  | 4.563E-20 |           |  |  |  | C1S       |       |
| V3SVHSHC_10605368 | LCTL      |  |  | 4.739E-20 |           |  |  |  | LCTL      |       |
| V3SVHSHC_10373807 | OR5B12    |  |  | 4.797E-20 |           |  |  |  | OR5B12    |       |
| V3SVHSHC_8801786  | GUCD1     |  |  | 4.852E-20 |           |  |  |  | GUCD1     |       |
| V3SVHSHC_7365692  | KIF12     |  |  | 5.024E-20 |           |  |  |  | KIF12     |       |
| V3SVHSHC_9141686  | PARD6B    |  |  | 5.073E-20 |           |  |  |  | PARD6B    |       |
| V3SVHSHC_6988469  | SEPT8     |  |  | 5.201E-20 |           |  |  |  | SEPT8     |       |
| V3SVHSHC_10769840 | C11orf21  |  |  | 5.609E-20 |           |  |  |  | C11orf21  |       |
| V3SVHSHC_9208709  | NDUFAF6   |  |  | 5.701E-20 |           |  |  |  | NDUFAF6   |       |
| V3SVHSHC_8918936  | PGBD3     |  |  | 5.721E-20 |           |  |  |  | PGBD3     |       |
| V3SVHSHC_9777497  | PTPRK     |  |  | 6.160E-20 |           |  |  |  | PTPRK     |       |
| V3SVHSHC_9092483  | TRMT2B    |  |  | 6.292E-20 |           |  |  |  | TRMT2B    |       |
| V3SVHSHC_9859964  | FOXO6     |  |  | 6.639E-20 |           |  |  |  | FOXO6     |       |
| V3SVHSHC_10573622 | TTC30A    |  |  | 6.678E-20 |           |  |  |  | TTC30A    |       |
| V3SVHSHC_8825942  | TMEM102   |  |  | 6.688E-20 |           |  |  |  | TMEM102   |       |
| V3SVHSHC_9629195  | TGDS      |  |  | 6.822E-20 |           |  |  |  | TGDS      |       |
| V3SVHSHC_4721534  | TARP      |  |  | 7.138E-20 |           |  |  |  | TARP      |       |
| V3SVHSHC_10164026 | SLC25A23  |  |  | 7.294E-20 |           |  |  |  | SLC25A23  |       |
| V3SVHSHC_10779080 | S100A2    |  |  | 7.622E-20 |           |  |  |  | S100A2    |       |
| V3SVHSHC_4650716  | CD226     |  |  | 7.715E-20 |           |  |  |  | CD226     |       |
| V3SVHSHC_7340744  | NPL       |  |  | 7.926E-20 |           |  |  |  | NPL       |       |
| V3SVHSHC_8487725  | PARD3     |  |  | 8.028E-20 |           |  |  |  | PARD3     |       |
| V3SVHSHC_6811028  | SH2D7     |  |  | 8.176E-20 |           |  |  |  | SH2D7     |       |
| V3SVHSHC_10449344 | ANGPT4    |  |  | 8.578E-20 |           |  |  |  | ANGPT4    |       |
| V3SVHSHC_7446146  | PSMB11    |  |  | 8.734E-20 |           |  |  |  | PSMB11    |       |
| V3SVHSHC_7586396  | OLFML2A   |  |  | 8.774E-20 |           |  |  |  | OLFML2A   |       |
| V3SVHSHC_7291640  | C11orf70  |  |  | 8.899E-20 |           |  |  |  | C11orf70  |       |
| V3SVHSHC_5706452  | CCDC178   |  |  | 9.537E-20 |           |  |  |  | CCDC178   |       |
| V3SVHSHC_8773043  | TRIM68    |  |  | 9.854E-20 |           |  |  |  | TRIM68    |       |
| V3SVHSHC_10047734 | MRPL36    |  |  | 1.003E-19 |           |  |  |  | MRPL36    |       |

|                   |              |  |  |           |  |  |  |              |  |
|-------------------|--------------|--|--|-----------|--|--|--|--------------|--|
| V3SVHSHC_7134824  | RFT1         |  |  | 1.006E-19 |  |  |  | RFT1         |  |
| V3SVHSHC_9840131  | BBOX1        |  |  | 1.043E-19 |  |  |  | BBOX1        |  |
| V3SVHSHC_8574515  | FUT6         |  |  | 1.059E-19 |  |  |  | FUT6         |  |
| V3SVHSHC_8419613  | CLTA         |  |  | 1.069E-19 |  |  |  | CLTA         |  |
| V3SVHSHC_7921907  | GDF5         |  |  | 1.092E-19 |  |  |  | GDF5         |  |
| V3SVHSHC_5624612  | ZBTB32       |  |  | 1.107E-19 |  |  |  | ZBTB32       |  |
| V3SVHSHC_8634905  | AP3B1        |  |  | 1.107E-19 |  |  |  | AP3B1        |  |
| V3SVHSHC_9990347  | BMP4         |  |  | 1.176E-19 |  |  |  | BMP4         |  |
| V3SVHSHC_8626754  | SAA2-SAA4    |  |  | 1.190E-19 |  |  |  | SAA2-SAA4    |  |
| V3SVHSHC_9921971  | LGALS7B      |  |  | 1.192E-19 |  |  |  | LGALS7B      |  |
| V3SVHSHC_10549730 | ANXA13       |  |  | 1.200E-19 |  |  |  | ANXA13       |  |
| V3SVHSHC_6206171  | CASC10       |  |  | 1.240E-19 |  |  |  | CASC10       |  |
| V3SVHSHC_9093968  | LOC101927789 |  |  | 1.268E-19 |  |  |  | LOC101927789 |  |
| V3SVHSHC_8793206  | PTPRN        |  |  | 1.291E-19 |  |  |  | PTPRN        |  |
| V3SVHSHC_5769713  | CCRL2        |  |  | 1.301E-19 |  |  |  | CCRL2        |  |
| V3SVHSHC_6567752  | TRIM31       |  |  | 1.389E-19 |  |  |  | TRIM31       |  |
| V3SVHSHC_8056514  | LMBR1        |  |  | 1.446E-19 |  |  |  | LMBR1        |  |
| V3SVHSHC_7138982  | RPL23A       |  |  | 1.476E-19 |  |  |  | RPL23A       |  |
| V3SVHSHC_7612004  | GSTO1        |  |  | 1.519E-19 |  |  |  | GSTO1        |  |
| V3SVHSHC_5233694  | RELN         |  |  | 1.623E-19 |  |  |  | RELN         |  |
| V3SVHSHC_9880259  | LOC100506127 |  |  | 1.625E-19 |  |  |  | LOC100506127 |  |
| V3SVHSHC_7635764  | CHIA         |  |  | 1.678E-19 |  |  |  | CHIA         |  |
| V3SVHSHC_5102519  | EFCAB13      |  |  | 1.961E-19 |  |  |  | EFCAB13      |  |
| V3SVHSHC_10216430 | CACFD1       |  |  | 1.975E-19 |  |  |  | CACFD1       |  |
| V3SVHSHC_7234682  | TENM3        |  |  | 2.091E-19 |  |  |  | TENM3        |  |
| V3SVHSHC_6377309  | COMP         |  |  | 2.112E-19 |  |  |  | COMP         |  |
| V3SVHSHC_8907419  | MRPL49       |  |  | 2.133E-19 |  |  |  | MRPL49       |  |
| V3SVHSHC_10536365 | TXNRD1       |  |  | 2.153E-19 |  |  |  | TXNRD1       |  |
| V3SVHSHC_5337050  | COX6B1       |  |  | 2.154E-19 |  |  |  | COX6B1       |  |
| V3SVHSHC_9955829  | SPAG5        |  |  | 2.267E-19 |  |  |  | SPAG5        |  |
| V3SVHSHC_5288639  | MTMR4        |  |  | 2.288E-19 |  |  |  | MTMR4        |  |
| V3SVHSHC_8335661  | RERGL        |  |  | 2.291E-19 |  |  |  | RERGL        |  |
| V3SVHSHC_5570030  | NAA25        |  |  | 2.292E-19 |  |  |  | NAA25        |  |
| V3SVHSHC_5916464  | ZNF419       |  |  | 2.342E-19 |  |  |  | ZNF419       |  |
| V3SVHSHC_5403578  | SLC35D3      |  |  | 2.461E-19 |  |  |  | SLC35D3      |  |
| V3SVHSHC_5708828  | FAM9B        |  |  | 2.543E-19 |  |  |  | FAM9B        |  |
| V3SVHSHC_10006352 | CEP57        |  |  | 2.576E-19 |  |  |  | CEP57        |  |
| V3SVHSHC_6357905  | PRIMPOL      |  |  | 2.613E-19 |  |  |  | PRIMPOL      |  |
| V3SVHSHC_6933557  | VCY1B        |  |  | 2.653E-19 |  |  |  | VCY1B        |  |
| V3SVHSHC_7233296  | LYPD5        |  |  | 2.749E-19 |  |  |  | LYPD5        |  |
| V3SVHSHC_9779906  | CNN2         |  |  | 2.759E-19 |  |  |  | CNN2         |  |
| V3SVHSHC_9891776  | ATP6V0A2     |  |  | 2.830E-19 |  |  |  | ATP6V0A2     |  |
| V3SVHSHC_10508117 | HIP1R        |  |  | 2.877E-19 |  |  |  | HIP1R        |  |
| V3SVHSHC_5167430  | SYNGAP1      |  |  | 3.016E-19 |  |  |  | SYNGAP1      |  |
| V3SVHSHC_9722387  | SENPA8       |  |  | 3.067E-19 |  |  |  | SENPA8       |  |
| V3SVHSHC_6858350  | RASL10A      |  |  | 3.078E-19 |  |  |  | RASL10A      |  |
| V3SVHSHC_10362785 | FPGT         |  |  | 3.084E-19 |  |  |  | FPGT         |  |
| V3SVHSHC_9108290  | ARHGAP19     |  |  | 3.095E-19 |  |  |  | ARHGAP19     |  |
| V3SVHSHC_8771426  | CDK5         |  |  | 3.274E-19 |  |  |  | CDK5         |  |
| V3SVHSHC_5840861  | C6ORF195     |  |  | 3.283E-19 |  |  |  | C6ORF195     |  |
| V3SVHSHC_8370443  | WDR31        |  |  | 3.578E-19 |  |  |  | WDR31        |  |

|                   |              |  |  |           |  |  |  |              |  |
|-------------------|--------------|--|--|-----------|--|--|--|--------------|--|
| V3SVHSHC_4669757  | GCNT1        |  |  | 3.674E-19 |  |  |  | GCNT1        |  |
| V3SVHSHC_6025265  | LHX5         |  |  | 3.873E-19 |  |  |  | LHX5         |  |
| V3SVHSHC_7279925  | GLA          |  |  | 3.911E-19 |  |  |  | GLA          |  |
| V3SVHSHC_4808390  | TAF12        |  |  | 4.386E-19 |  |  |  | TAF12        |  |
| V3SVHSHC_8473040  | TMX3         |  |  | 4.404E-19 |  |  |  | TMX3         |  |
| V3SVHSHC_6280784  | CERCAM       |  |  | 4.505E-19 |  |  |  | CERCAM       |  |
| V3SVHSHC_5237093  | SOX11        |  |  | 4.517E-19 |  |  |  | SOX11        |  |
| V3SVHSHC_8556728  | BAGE2        |  |  | 4.582E-19 |  |  |  | BAGE2        |  |
| V3SVHSHC_10307213 | OR5AN1       |  |  | 4.603E-19 |  |  |  | OR5AN1       |  |
| V3SVHSHC_10427927 | FLVCR1       |  |  | 4.634E-19 |  |  |  | FLVCR1       |  |
| V3SVHSHC_10591805 | MTNR1B       |  |  | 4.770E-19 |  |  |  | MTNR1B       |  |
| V3SVHSHC_6060344  | ERICH1       |  |  | 4.912E-19 |  |  |  | ERICH1       |  |
| V3SVHSHC_5182577  | PRPF38B      |  |  | 5.085E-19 |  |  |  | PRPF38B      |  |
| V3SVHSHC_9591080  | METTL9       |  |  | 5.151E-19 |  |  |  | METTL9       |  |
| V3SVHSHC_6054701  | C1orf159     |  |  | 5.324E-19 |  |  |  | C1orf159     |  |
| V3SVHSHC_5400311  | RASGRP1      |  |  | 5.428E-19 |  |  |  | RASGRP1      |  |
| V3SVHSHC_7830431  | LOC100506922 |  |  | 5.497E-19 |  |  |  | LOC100506922 |  |
| V3SVHSHC_9205508  | CMTM3        |  |  | 5.732E-19 |  |  |  | CMTM3        |  |
| V3SVHSHC_10094132 | IPO5         |  |  | 5.836E-19 |  |  |  | IPO5         |  |
| V3SVHSHC_7811390  | NXNL1        |  |  | 5.955E-19 |  |  |  | NXNL1        |  |
| V3SVHSHC_7994672  | PRAMEF5      |  |  | 5.981E-19 |  |  |  | PRAMEF5      |  |
| V3SVHSHC_8541614  | IRF2BPL      |  |  | 6.065E-19 |  |  |  | IRF2BPL      |  |
| V3SVHSHC_9742022  | CYP24A1      |  |  | 6.234E-19 |  |  |  | CYP24A1      |  |
| V3SVHSHC_8989193  | OR8J3        |  |  | 6.380E-19 |  |  |  | OR8J3        |  |
| V3SVHSHC_7914845  | PRKCI        |  |  | 7.074E-19 |  |  |  | PRKCI        |  |
| V3SVHSHC_6870197  | SLC1A1       |  |  | 7.142E-19 |  |  |  | SLC1A1       |  |
| V3SVHSHC_7813964  | RND2         |  |  | 7.301E-19 |  |  |  | RND2         |  |
| V3SVHSHC_10437728 | CDC14B       |  |  | 7.311E-19 |  |  |  | CDC14B       |  |
| V3SVHSHC_4726682  | USP28        |  |  | 7.422E-19 |  |  |  | USP28        |  |
| V3SVHSHC_7684439  | LOC199882    |  |  | 7.659E-19 |  |  |  | LOC199882    |  |
| V3SVHSHC_5498255  | ZNF879       |  |  | 8.155E-19 |  |  |  | ZNF879       |  |
| V3SVHSHC_7028762  | KT112        |  |  | 8.156E-19 |  |  |  | KT112        |  |
| V3SVHSHC_4752983  | HK2          |  |  | 8.244E-19 |  |  |  | HK2          |  |
| V3SVHSHC_6179210  | PTP4A1       |  |  | 8.353E-19 |  |  |  | PTP4A1       |  |
| V3SVHSHC_10671698 | SH3RF3       |  |  | 8.451E-19 |  |  |  | SH3RF3       |  |
| V3SVHSHC_5818190  | ERAL1        |  |  | 8.791E-19 |  |  |  | ERAL1        |  |
| V3SVHSHC_9797099  | TERT         |  |  | 8.806E-19 |  |  |  | TERT         |  |
| V3SVHSHC_9813467  | EEA1         |  |  | 8.836E-19 |  |  |  | EEA1         |  |
| V3SVHSHC_10704929 | CTNNB1       |  |  | 9.191E-19 |  |  |  | CTNNB1       |  |
| V3SVHSHC_4965734  | HOXD9        |  |  | 9.315E-19 |  |  |  | HOXD9        |  |
| V3SVHSHC_6454331  | GNAI1        |  |  | 9.935E-19 |  |  |  | GNAI1        |  |
| V3SVHSHC_5554388  | MFNG         |  |  | 1.008E-18 |  |  |  | MFNG         |  |
| V3SVHSHC_9829406  | KLHL36       |  |  | 1.015E-18 |  |  |  | KLHL36       |  |
| V3SVHSHC_5865710  | AP5B1        |  |  | 1.035E-18 |  |  |  | AP5B1        |  |
| V3SVHSHC_9130796  | PPFIA3       |  |  | 1.066E-18 |  |  |  | PPFIA3       |  |
| V3SVHSHC_5486903  | OR4F17       |  |  | 1.069E-18 |  |  |  | OR4F17       |  |
| V3SVHSHC_8846237  | OTUB1        |  |  | 1.105E-18 |  |  |  | OTUB1        |  |
| V3SVHSHC_5452748  | GUCY2D       |  |  | 1.113E-18 |  |  |  | GUCY2D       |  |
| V3SVHSHC_8658764  | CHAMP1       |  |  | 1.142E-18 |  |  |  | CHAMP1       |  |
| V3SVHSHC_6330746  | LOC101928991 |  |  | 1.163E-18 |  |  |  | LOC101928991 |  |
| V3SVHSHC_8688761  | PLAC1        |  |  | 1.235E-18 |  |  |  | PLAC1        |  |
| V3SVHSHC_6625931  | CGRRF1       |  |  | 1.292E-18 |  |  |  | CGRRF1       |  |

|                   |            |  |  |           |           |  |  |            |        |
|-------------------|------------|--|--|-----------|-----------|--|--|------------|--------|
| V3SVHSHC_6501158  | STAT4      |  |  | 1.293E-18 |           |  |  | STAT4      |        |
| V3SVHSHC_10384532 | SSBP4      |  |  | 1.310E-18 |           |  |  | SSBP4      |        |
| V3SVHSHC_6062654  | MXI1       |  |  | 1.350E-18 |           |  |  | MXI1       |        |
| V3SVHSHC_9928307  | HKDC1      |  |  | 1.370E-18 |           |  |  | HKDC1      |        |
| V3SVHSHC_4852775  | MUC7       |  |  | 1.440E-18 |           |  |  | MUC7       |        |
| V3SVHSHC_10745915 | DNAJB7     |  |  | 1.447E-18 |           |  |  | DNAJB7     |        |
| V3SVHSHC_9293090  | SYN1       |  |  | 1.607E-18 |           |  |  | SYN1       |        |
| V3SVHSHC_5921612  | PTPN14     |  |  | 1.658E-18 |           |  |  | PTPN14     |        |
| V3SVHSHC_10719482 | TMED9      |  |  | 1.803E-18 |           |  |  | TMED9      |        |
| V3SVHSHC_8514686  | THRSP      |  |  | 1.834E-18 |           |  |  | THRSP      |        |
| V3SVHSHC_10041893 | AIF1L      |  |  | 1.843E-18 |           |  |  | AIF1L      |        |
| V3SVHSHC_9330281  | TMEM129    |  |  | 1.913E-18 |           |  |  | TMEM129    |        |
| V3SVHSHC_5288672  | TGM5       |  |  | 1.995E-18 |           |  |  | TGM5       |        |
| V3SVHSHC_7118126  | LCNL1      |  |  | 2.003E-18 |           |  |  | LCNL1      |        |
| V3SVHSHC_8466374  | ARMC8      |  |  | 2.054E-18 |           |  |  | ARMC8      |        |
| V3SVHSHC_8428226  | SLC19A2    |  |  | 2.067E-18 |           |  |  | SLC19A2    |        |
| V3SVHSHC_6237587  | IDS        |  |  | 2.144E-18 |           |  |  | IDS        |        |
| V3SVHSHC_9847061  | CNTNAP3B   |  |  | 2.203E-18 |           |  |  | CNTNAP3B   |        |
| V3SVHSHC_9265205  | PLK3       |  |  | 2.287E-18 |           |  |  | PLK3       |        |
| V3SVHSHC_10276622 | Cers2      |  |  | 2.289E-18 |           |  |  | Cers2      |        |
| V3SVHSHC_5943194  | VCL        |  |  | 2.334E-18 |           |  |  | VCL        |        |
| V3SVHSHC_6236531  | REV3L      |  |  | 2.413E-18 |           |  |  | REV3L      |        |
| V3SVHSHC_7252370  | CUTA       |  |  | 2.428E-18 |           |  |  | CUTA       |        |
| V3SVHSHC_7948934  | TNF        |  |  | 2.467E-18 |           |  |  | TNF        |        |
| V3SVHSHC_10317080 | RHOB       |  |  | 2.607E-18 |           |  |  | RHOB       |        |
| V3SVHSHC_6709454  | F9         |  |  | 2.628E-18 |           |  |  | F9         |        |
| V3SVHSHC_9642626  | FAM151B    |  |  | 2.634E-18 |           |  |  | FAM151B    |        |
| V3SVHSHC_9591740  | TBX18      |  |  | 2.703E-18 |           |  |  | TBX18      |        |
| V3SVHSHC_8828285  | DEFA1B     |  |  | 2.789E-18 |           |  |  | DEFA1B     |        |
| V3SVHSHC_10317245 | ZNF319     |  |  | 2.870E-18 |           |  |  | ZNF319     |        |
| V3SVHSHC_10443965 | C17orf70   |  |  | 2.897E-18 |           |  |  | C17orf70   |        |
| V3SVHSHC_5411201  | LNX2       |  |  | 2.934E-18 |           |  |  | LNX2       |        |
| V3SVHSHC_6730211  | ALDH8A1    |  |  | 3.082E-18 |           |  |  | ALDH8A1    |        |
| V3SVHSHC_4841621  | WDR31      |  |  | 3.082E-18 |           |  |  | WDR31      |        |
| V3SVHSHC_7776212  | TK2        |  |  | 3.132E-18 |           |  |  | TK2        |        |
| V3SVHSHC_9885308  | P2RX4      |  |  | 3.174E-18 |           |  |  | P2RX4      |        |
| V3SVHSHC_8827823  | CBX6       |  |  | 3.190E-18 |           |  |  | CBX6       |        |
| V3SVHSHC_6362987  | ZC3HC1     |  |  | 3.438E-18 |           |  |  | ZC3HC1     |        |
| V3SVHSHC_7006058  | VWF        |  |  | 3.561E-18 |           |  |  | VWF        |        |
| V3SVHSHC_5891648  | TMEM214    |  |  | 3.677E-18 |           |  |  | TMEM214    |        |
| V3SVHSHC_9819440  | GAS6       |  |  | 3.791E-18 |           |  |  | GAS6       |        |
| V3SVHSHC_10084991 | TRIM62     |  |  | 3.946E-18 |           |  |  | TRIM62     |        |
| V3SVHSHC_8334176  | PET117     |  |  | 3.953E-18 | 4.238E-15 |  |  | PET117     | PET117 |
| V3SVHSHC_8487098  | MAP1LC3BP1 |  |  | 4.119E-18 |           |  |  | MAP1LC3BP1 |        |
| V3SVHSHC_6927419  | LEKR1      |  |  | 4.251E-18 |           |  |  | LEKR1      |        |
| V3SVHSHC_8932499  | SMARCC1    |  |  | 4.266E-18 |           |  |  | SMARCC1    |        |
| V3SVHSHC_6161159  | ECHDC2     |  |  | 4.277E-18 |           |  |  | ECHDC2     |        |
| V3SVHSHC_4870727  | Magt1      |  |  | 4.457E-18 |           |  |  | Magt1      |        |
| V3SVHSHC_8414036  | SMCO4      |  |  | 4.458E-18 |           |  |  | SMCO4      |        |
| V3SVHSHC_6744467  | SEMA4F     |  |  | 4.519E-18 |           |  |  | SEMA4F     |        |
| V3SVHSHC_7444892  | GKN2       |  |  | 4.585E-18 |           |  |  | GKN2       |        |
| V3SVHSHC_5082719  | ABCA3      |  |  | 4.637E-18 |           |  |  | ABCA3      |        |
| V3SVHSHC_4727309  | FGFR3      |  |  | 4.652E-18 |           |  |  | FGFR3      |        |

|                   |           |  |  |           |           |  |  |               |         |
|-------------------|-----------|--|--|-----------|-----------|--|--|---------------|---------|
| V3SVHSHC_10543988 | PAGE2B    |  |  | 4.709E-18 |           |  |  | PAGE2B        |         |
| V3SVHSHC_7227356  | ESAM      |  |  | 4.744E-18 |           |  |  | ESAM          |         |
| V3SVHSHC_5138423  | GOLGA4    |  |  | 4.749E-18 |           |  |  | GOLGA4        |         |
| V3SVHSHC_6036254  | TRIM59    |  |  | 4.970E-18 |           |  |  | TRIM59        |         |
| V3SVHSHC_4899206  | PRRC2C    |  |  | 5.233E-18 |           |  |  | PRRC2C        |         |
| V3SVHSHC_7005992  | DDX51     |  |  | 5.726E-18 |           |  |  | DDX51         |         |
| V3SVHSHC_10302923 | PIK3C2A   |  |  | 5.814E-18 | 1.164E-10 |  |  | PIK3C2A       | PIK3C2A |
| V3SVHSHC_9279824  | KIF5C     |  |  | 5.839E-18 |           |  |  | KIF5C         |         |
| V3SVHSHC_5053811  | PCBP2     |  |  | 5.928E-18 |           |  |  | PCBP2         |         |
| V3SVHSHC_9240554  | SPATA31A6 |  |  | 6.048E-18 |           |  |  | SPATA31<br>A6 |         |
| V3SVHSHC_8123768  | NPY4R     |  |  | 6.368E-18 |           |  |  | NPY4R         |         |
| V3SVHSHC_8771756  | RHOH      |  |  | 6.577E-18 |           |  |  | RHOH          |         |
| V3SVHSHC_7046483  | PSMC1     |  |  | 6.632E-18 |           |  |  | PSMC1         |         |
| V3SVHSHC_10420370 | MGAT5     |  |  | 6.736E-18 |           |  |  | MGAT5         |         |
| V3SVHSHC_8940023  | CSF2RB    |  |  | 7.068E-18 |           |  |  | CSF2RB        |         |
| V3SVHSHC_6410903  | MMP28     |  |  | 7.318E-18 |           |  |  | MMP28         |         |
| V3SVHSHC_7012196  | PCDH9     |  |  | 7.759E-18 |           |  |  | PCDH9         |         |
| V3SVHSHC_7028696  | ANPEP     |  |  | 7.824E-18 |           |  |  | ANPEP         |         |
| V3SVHSHC_6754037  | LOC391322 |  |  | 7.916E-18 |           |  |  | LOC39132<br>2 |         |
| V3SVHSHC_10059878 | VAMP8     |  |  | 7.925E-18 |           |  |  | VAMP8         |         |
| V3SVHSHC_8165249  | C11orf95  |  |  | 8.329E-18 |           |  |  | C11orf95      |         |
| V3SVHSHC_8184488  | LMAN2     |  |  | 8.383E-18 |           |  |  | LMAN2         |         |
| V3SVHSHC_5358995  | WNT3A     |  |  | 8.911E-18 |           |  |  | WNT3A         |         |
| V3SVHSHC_9435320  | B2M       |  |  | 9.027E-18 |           |  |  | B2M           |         |
| V3SVHSHC_7758227  | SLC35A2   |  |  | 9.121E-18 |           |  |  | SLC35A2       |         |
| V3SVHSHC_10115318 | MFI2      |  |  | 9.122E-18 |           |  |  | MFI2          |         |
| V3SVHSHC_9779675  | RFX5      |  |  | 9.168E-18 |           |  |  | RFX5          |         |
| V3SVHSHC_9456275  | PRAMEF7   |  |  | 9.725E-18 |           |  |  | PRAMEF7       |         |
| V3SVHSHC_7180133  | HTR2A     |  |  | 9.813E-18 |           |  |  | HTR2A         |         |
| V3SVHSHC_6395492  | LMAN2     |  |  | 9.882E-18 |           |  |  | LMAN2         |         |
| V3SVHSHC_5791757  | MTRNR2L5  |  |  | 1.012E-17 |           |  |  | MTRNR2L<br>5  |         |
| V3SVHSHC_10437464 | MFAP4     |  |  | 1.017E-17 |           |  |  | MFAP4         |         |
| V3SVHSHC_4920524  | MMP10     |  |  | 1.027E-17 |           |  |  | MMP10         |         |
| V3SVHSHC_9822740  | CCDC120   |  |  | 1.036E-17 |           |  |  | CCDC120       |         |
| V3SVHSHC_10278800 | ZSCAN20   |  |  | 1.052E-17 |           |  |  | ZSCAN20       |         |
| V3SVHSHC_9565406  | MIEF1     |  |  | 1.053E-17 | 4.672E-01 |  |  | MIEF1         |         |
| V3SVHSHC_5685233  | Cela1     |  |  | 1.089E-17 |           |  |  | Cela1         |         |
| V3SVHSHC_8043380  | ENKD1     |  |  | 1.099E-17 |           |  |  | ENKD1         |         |
| V3SVHSHC_7121756  | TP53I11   |  |  | 1.105E-17 |           |  |  | TP53I11       |         |
| V3SVHSHC_7776179  | PPP1CB    |  |  | 1.274E-17 |           |  |  | PPP1CB        |         |
| V3SVHSHC_6980615  | CCBE1     |  |  | 1.313E-17 |           |  |  | CCBE1         |         |
| V3SVHSHC_6089912  | SVIL      |  |  | 1.342E-17 |           |  |  | SVIL          |         |
| V3SVHSHC_9595601  | APOBEC3A  |  |  | 1.443E-17 |           |  |  | APOBEC3<br>A  |         |
| V3SVHSHC_5284382  | COL8A1    |  |  | 1.477E-17 |           |  |  | COL8A1        |         |
| V3SVHSHC_9677375  | MYO9B     |  |  | 1.495E-17 |           |  |  | MYO9B         |         |
| V3SVHSHC_9460103  | RNASE6    |  |  | 1.514E-17 |           |  |  | RNASE6        |         |
| V3SVHSHC_7694801  | NKIRAS2   |  |  | 1.526E-17 |           |  |  | NKIRAS2       |         |
| V3SVHSHC_4918148  | ARMC8     |  |  | 1.559E-17 |           |  |  | ARMC8         |         |
| V3SVHSHC_5087570  | CCDC36    |  |  | 1.658E-17 |           |  |  | CCDC36        |         |
| V3SVHSHC_10225208 | GLIPR1L1  |  |  | 1.769E-17 |           |  |  | GLIPR1L1      |         |
| V3SVHSHC_7892669  | CCNF      |  |  | 1.780E-17 |           |  |  | CCNF          |         |

|                   |           |  |  |           |  |  |  |           |  |
|-------------------|-----------|--|--|-----------|--|--|--|-----------|--|
| V3SVHSHC_7025363  | RBM44     |  |  | 1.799E-17 |  |  |  | RBM44     |  |
| V3SVHSHC_6024176  | Rpl18a    |  |  | 1.851E-17 |  |  |  | Rpl18a    |  |
| V3SVHSHC_10813136 | KRTAP12-2 |  |  | 2.122E-17 |  |  |  | KRTAP12-2 |  |
| V3SVHSHC_10471190 | OPN3      |  |  | 2.147E-17 |  |  |  | OPN3      |  |
| V3SVHSHC_6049421  | POTEI     |  |  | 2.228E-17 |  |  |  | POTEI     |  |
| V3SVHSHC_7685990  | STXBP5    |  |  | 2.233E-17 |  |  |  | STXBP5    |  |
| V3SVHSHC_6331043  | CCDC54    |  |  | 2.236E-17 |  |  |  | CCDC54    |  |
| V3SVHSHC_8230589  | KLHL13    |  |  | 2.422E-17 |  |  |  | KLHL13    |  |
| V3SVHSHC_7572239  | IFNW1     |  |  | 2.466E-17 |  |  |  | IFNW1     |  |
| V3SVHSHC_7086215  | DPPA5     |  |  | 2.516E-17 |  |  |  | DPPA5     |  |
| V3SVHSHC_5741828  | FHAD1     |  |  | 2.532E-17 |  |  |  | FHAD1     |  |
| V3SVHSHC_4852907  | NME2      |  |  | 2.533E-17 |  |  |  | NME2      |  |
| V3SVHSHC_6654377  | ZNF32     |  |  | 2.538E-17 |  |  |  | ZNF32     |  |
| V3SVHSHC_9714368  | LPO       |  |  | 2.585E-17 |  |  |  | LPO       |  |
| V3SVHSHC_5674376  | PRR14L    |  |  | 2.633E-17 |  |  |  | PRR14L    |  |
| V3SVHSHC_10723310 | CRYL1     |  |  | 2.646E-17 |  |  |  | CRYL1     |  |
| V3SVHSHC_7803437  | PTPN18    |  |  | 2.702E-17 |  |  |  | PTPN18    |  |
| V3SVHSHC_9249332  | TRIM49D1  |  |  | 2.705E-17 |  |  |  | TRIM49D1  |  |
| V3SVHSHC_8085257  | TMCO4     |  |  | 2.751E-17 |  |  |  | TMCO4     |  |
| V3SVHSHC_9780962  | TSR2      |  |  | 2.758E-17 |  |  |  | TSR2      |  |
| V3SVHSHC_8099018  | SOX11     |  |  | 2.934E-17 |  |  |  | SOX11     |  |
| V3SVHSHC_10846829 | ZNF720    |  |  | 2.970E-17 |  |  |  | ZNF720    |  |
| V3SVHSHC_6318206  | TAS2R46   |  |  | 2.994E-17 |  |  |  | TAS2R46   |  |
| V3SVHSHC_5385296  | Ttc23l    |  |  | 3.008E-17 |  |  |  | Ttc23l    |  |
| V3SVHSHC_5458094  | GOLGA6L9  |  |  | 3.099E-17 |  |  |  | GOLGA6L9  |  |
| V3SVHSHC_5888183  | LMX1B     |  |  | 3.191E-17 |  |  |  | LMX1B     |  |
| V3SVHSHC_7437764  | S100PBP   |  |  | 3.192E-17 |  |  |  | S100PBP   |  |
| V3SVHSHC_4864457  | DNASE2B   |  |  | 3.194E-17 |  |  |  | DNASE2B   |  |
| V3SVHSHC_6739583  | SEPW1     |  |  | 3.199E-17 |  |  |  | SEPW1     |  |
| V3SVHSHC_9741626  | RAD23B    |  |  | 3.414E-17 |  |  |  | RAD23B    |  |
| V3SVHSHC_7013945  | XKRX      |  |  | 3.442E-17 |  |  |  | XKRX      |  |
| V3SVHSHC_8951408  | BMP7      |  |  | 3.445E-17 |  |  |  | BMP7      |  |
| V3SVHSHC_6028004  | GAGE2E    |  |  | 3.477E-17 |  |  |  | GAGE2E    |  |
| V3SVHSHC_9472412  | DNAJB6    |  |  | 3.563E-17 |  |  |  | DNAJB6    |  |
| V3SVHSHC_6152480  | KLF6      |  |  | 3.680E-17 |  |  |  | KLF6      |  |
| V3SVHSHC_9629855  | PBX2      |  |  | 3.708E-17 |  |  |  | PBX2      |  |
| V3SVHSHC_5827496  | NDUFA9    |  |  | 3.999E-17 |  |  |  | NDUFA9    |  |
| V3SVHSHC_8922467  | RAB21     |  |  | 4.023E-17 |  |  |  | RAB21     |  |
| V3SVHSHC_6885014  | OR2M4     |  |  | 4.039E-17 |  |  |  | OR2M4     |  |
| V3SVHSHC_5072984  | ITM2B     |  |  | 4.058E-17 |  |  |  | ITM2B     |  |
| V3SVHSHC_4633259  | KIAA1244  |  |  | 4.149E-17 |  |  |  | KIAA1244  |  |
| V3SVHSHC_5646689  | LDOC1L    |  |  | 4.220E-17 |  |  |  | LDOC1L    |  |
| V3SVHSHC_9770468  | FAM206A   |  |  | 4.716E-17 |  |  |  | FAM206A   |  |
| V3SVHSHC_5903660  | G3BP2     |  |  | 4.777E-17 |  |  |  | G3BP2     |  |
| V3SVHSHC_5401070  | RIPK2     |  |  | 4.779E-17 |  |  |  | RIPK2     |  |
| V3SVHSHC_7725425  | MAP4K5    |  |  | 4.892E-17 |  |  |  | MAP4K5    |  |
| V3SVHSHC_8803898  | PPP4R1    |  |  | 5.118E-17 |  |  |  | PPP4R1    |  |
| V3SVHSHC_9455813  | CARD14    |  |  | 5.613E-17 |  |  |  | CARD14    |  |
| V3SVHSHC_9595931  | OR11H4    |  |  | 5.670E-17 |  |  |  | OR11H4    |  |
| V3SVHSHC_9164192  | RGPD2     |  |  | 5.816E-17 |  |  |  | RGPD2     |  |
| V3SVHSHC_7166504  | Clec18a   |  |  | 5.888E-17 |  |  |  | Clec18a   |  |
| V3SVHSHC_6326819  | CD151     |  |  | 6.077E-17 |  |  |  | CD151     |  |
| V3SVHSHC_9865871  | FAM229A   |  |  | 6.092E-17 |  |  |  | FAM229A   |  |

|                   |              |  |  |           |           |  |  |              |  |
|-------------------|--------------|--|--|-----------|-----------|--|--|--------------|--|
| V3SVHSHC_6464066  | CEACAM16     |  |  | 6.457E-17 |           |  |  | CEACAM16     |  |
| V3SVHSHC_7691633  | SCAI         |  |  | 6.470E-17 |           |  |  | SCAI         |  |
| V3SVHSHC_6581777  | Krtdap       |  |  | 6.660E-17 |           |  |  | Krtdap       |  |
| V3SVHSHC_9504752  | WDR75        |  |  | 6.704E-17 |           |  |  | WDR75        |  |
| V3SVHSHC_8202902  | PKIA         |  |  | 6.861E-17 |           |  |  | PKIA         |  |
| V3SVHSHC_5343254  | MMP17        |  |  | 7.112E-17 |           |  |  | MMP17        |  |
| V3SVHSHC_9150398  | TDRD5        |  |  | 7.228E-17 |           |  |  | TDRD5        |  |
| V3SVHSHC_10022390 | ATF7IP2      |  |  | 7.713E-17 |           |  |  | ATF7IP2      |  |
| V3SVHSHC_6187625  | RPS6KA1      |  |  | 8.151E-17 |           |  |  | RPS6KA1      |  |
| V3SVHSHC_7325168  | DEFB121      |  |  | 8.186E-17 |           |  |  | DEFB121      |  |
| V3SVHSHC_9883724  | SPIDR        |  |  | 8.186E-17 |           |  |  | SPIDR        |  |
| V3SVHSHC_10556363 | KLHDC9       |  |  | 8.222E-17 |           |  |  | KLHDC9       |  |
| V3SVHSHC_4989131  | ZNF165       |  |  | 8.274E-17 |           |  |  | ZNF165       |  |
| V3SVHSHC_4655996  | ZMYND11      |  |  | 8.390E-17 |           |  |  | ZMYND11      |  |
| V3SVHSHC_5995664  | CD207        |  |  | 8.434E-17 |           |  |  | CD207        |  |
| V3SVHSHC_5074469  | CCDC104      |  |  | 8.480E-17 |           |  |  | CCDC104      |  |
| V3SVHSHC_8474657  | SLC46A1      |  |  | 8.505E-17 |           |  |  | SLC46A1      |  |
| V3SVHSHC_4971344  | C4orf27      |  |  | 9.331E-17 | 1.620E-01 |  |  | C4orf27      |  |
| V3SVHSHC_8966390  | PITPNM3      |  |  | 9.412E-17 |           |  |  | PITPNM3      |  |
| V3SVHSHC_7853564  | NFU1         |  |  | 9.671E-17 |           |  |  | NFU1         |  |
| V3SVHSHC_5642366  | LAT2         |  |  | 1.004E-16 |           |  |  | LAT2         |  |
| V3SVHSHC_9076049  | ADAT2        |  |  | 1.024E-16 |           |  |  | ADAT2        |  |
| V3SVHSHC_6663023  | MED20        |  |  | 1.026E-16 |           |  |  | MED20        |  |
| V3SVHSHC_10326056 | PCDH18       |  |  | 1.063E-16 |           |  |  | PCDH18       |  |
| V3SVHSHC_4731203  | TMEM231      |  |  | 1.080E-16 |           |  |  | TMEM231      |  |
| V3SVHSHC_8137232  | BRINP1       |  |  | 1.102E-16 |           |  |  | BRINP1       |  |
| V3SVHSHC_10366415 | TMEM255A     |  |  | 1.121E-16 |           |  |  | TMEM255A     |  |
| V3SVHSHC_9345923  | TMEM107      |  |  | 1.161E-16 |           |  |  | TMEM107      |  |
| V3SVHSHC_5024639  | C12orf65     |  |  | 1.180E-16 |           |  |  | C12orf65     |  |
| V3SVHSHC_6017015  | HRNR         |  |  | 1.194E-16 |           |  |  | HRNR         |  |
| V3SVHSHC_8084168  | RANBP9       |  |  | 1.253E-16 |           |  |  | RANBP9       |  |
| V3SVHSHC_8389781  | B3GNT2       |  |  | 1.263E-16 |           |  |  | B3GNT2       |  |
| V3SVHSHC_7991108  | GLUD2        |  |  | 1.270E-16 |           |  |  | GLUD2        |  |
| V3SVHSHC_9532538  | ASB15        |  |  | 1.299E-16 |           |  |  | ASB15        |  |
| V3SVHSHC_6193268  | C9ORF91      |  |  | 1.313E-16 |           |  |  | C9ORF91      |  |
| V3SVHSHC_7404203  | IL2RA        |  |  | 1.324E-16 |           |  |  | IL2RA        |  |
| V3SVHSHC_5405558  | OAZ1         |  |  | 1.329E-16 |           |  |  | OAZ1         |  |
| V3SVHSHC_9210755  | CCL22        |  |  | 1.340E-16 |           |  |  | CCL22        |  |
| V3SVHSHC_7134032  | TBC1D5       |  |  | 1.344E-16 |           |  |  | TBC1D5       |  |
| V3SVHSHC_5245937  | REEP3        |  |  | 1.393E-16 |           |  |  | REEP3        |  |
| V3SVHSHC_4852346  | FEZ2         |  |  | 1.394E-16 |           |  |  | FEZ2         |  |
| V3SVHSHC_10231841 | CHGA         |  |  | 1.401E-16 |           |  |  | CHGA         |  |
| V3SVHSHC_6964577  | LETM1        |  |  | 1.422E-16 |           |  |  | LETM1        |  |
| V3SVHSHC_8426180  | FAM209B      |  |  | 1.464E-16 |           |  |  | FAM209B      |  |
| V3SVHSHC_9365228  | GPR162       |  |  | 1.472E-16 |           |  |  | GPR162       |  |
| V3SVHSHC_5758031  | CRX          |  |  | 1.593E-16 |           |  |  | CRX          |  |
| V3SVHSHC_5046023  | KRT78        |  |  | 1.678E-16 |           |  |  | KRT78        |  |
| V3SVHSHC_5957153  | C11ORF31     |  |  | 1.689E-16 |           |  |  | C11ORF31     |  |
| V3SVHSHC_8180990  | VIPAS39      |  |  | 1.788E-16 |           |  |  | VIPAS39      |  |
| V3SVHSHC_5686520  | LOC101928558 |  |  | 1.829E-16 |           |  |  | LOC101928558 |  |
| V3SVHSHC_6767798  | FAM65A       |  |  | 1.841E-16 |           |  |  | FAM65A       |  |
| V3SVHSHC_8962595  | VAMP7        |  |  | 1.863E-16 |           |  |  | VAMP7        |  |

|                   |              |  |  |           |  |  |  |  |              |  |
|-------------------|--------------|--|--|-----------|--|--|--|--|--------------|--|
| V3SVHSHC_9465581  | CNDP2        |  |  | 1.908E-16 |  |  |  |  | CNDP2        |  |
| V3SVHSHC_10143500 | BDH2         |  |  | 1.940E-16 |  |  |  |  | BDH2         |  |
| V3SVHSHC_6511784  | RER1         |  |  | 1.975E-16 |  |  |  |  | RER1         |  |
| V3SVHSHC_8316257  | KIAA1244     |  |  | 1.996E-16 |  |  |  |  | KIAA1244     |  |
| V3SVHSHC_5076746  | MTRNR2L3     |  |  | 2.103E-16 |  |  |  |  | MTRNR2L3     |  |
| V3SVHSHC_8633123  | KIF13A       |  |  | 2.117E-16 |  |  |  |  | KIF13A       |  |
| V3SVHSHC_5014838  | SNAI3        |  |  | 2.240E-16 |  |  |  |  | SNAI3        |  |
| V3SVHSHC_7738856  | CCZ1B        |  |  | 2.273E-16 |  |  |  |  | CCZ1B        |  |
| V3SVHSHC_8389319  | CYBA         |  |  | 2.382E-16 |  |  |  |  | CYBA         |  |
| V3SVHSHC_9744035  | PON3         |  |  | 2.400E-16 |  |  |  |  | PON3         |  |
| V3SVHSHC_10195211 | KRT78        |  |  | 2.425E-16 |  |  |  |  | KRT78        |  |
| V3SVHSHC_6839837  | NAGPA        |  |  | 2.433E-16 |  |  |  |  | NAGPA        |  |
| V3SVHSHC_6521090  | C1orf112     |  |  | 2.457E-16 |  |  |  |  | C1orf112     |  |
| V3SVHSHC_8851484  | LPA          |  |  | 2.475E-16 |  |  |  |  | LPA          |  |
| V3SVHSHC_5235278  | SBK3         |  |  | 2.492E-16 |  |  |  |  | SBK3         |  |
| V3SVHSHC_10536893 | KCNAB3       |  |  | 2.681E-16 |  |  |  |  | KCNAB3       |  |
| V3SVHSHC_10630580 | MIB2         |  |  | 2.834E-16 |  |  |  |  | MIB2         |  |
| V3SVHSHC_4825682  | THRAP3       |  |  | 2.896E-16 |  |  |  |  | THRAP3       |  |
| V3SVHSHC_8542373  | CAMP         |  |  | 2.915E-16 |  |  |  |  | CAMP         |  |
| V3SVHSHC_7729385  | TRDN         |  |  | 2.996E-16 |  |  |  |  | TRDN         |  |
| V3SVHSHC_9709880  | PLEKHJ1      |  |  | 3.001E-16 |  |  |  |  | PLEKHJ1      |  |
| V3SVHSHC_6985070  | KLC3         |  |  | 3.036E-16 |  |  |  |  | KLC3         |  |
| V3SVHSHC_8042852  | THSD7B       |  |  | 3.038E-16 |  |  |  |  | THSD7B       |  |
| V3SVHSHC_10568870 | PRDM4        |  |  | 3.175E-16 |  |  |  |  | PRDM4        |  |
| V3SVHSHC_7704338  | LOC101929991 |  |  | 3.231E-16 |  |  |  |  | LOC101929991 |  |
| V3SVHSHC_7354901  | YIPF5        |  |  | 3.430E-16 |  |  |  |  | YIPF5        |  |
| V3SVHSHC_10267646 | TMEM249      |  |  | 3.437E-16 |  |  |  |  | TMEM249      |  |
| V3SVHSHC_7369916  | PKDCC        |  |  | 3.453E-16 |  |  |  |  | PKDCC        |  |
| V3SVHSHC_6944051  | GABRP        |  |  | 3.605E-16 |  |  |  |  | GABRP        |  |
| V3SVHSHC_9066512  | BTAF1        |  |  | 3.779E-16 |  |  |  |  | BTAF1        |  |
| V3SVHSHC_5009426  | CASQ2        |  |  | 3.814E-16 |  |  |  |  | CASQ2        |  |
| V3SVHSHC_8865773  | GLYCTK       |  |  | 3.858E-16 |  |  |  |  | GLYCTK       |  |
| V3SVHSHC_7546961  | KATNA1       |  |  | 3.903E-16 |  |  |  |  | KATNA1       |  |
| V3SVHSHC_4661441  | RCN3         |  |  | 3.929E-16 |  |  |  |  | RCN3         |  |
| V3SVHSHC_5544785  | PTBP3        |  |  | 4.064E-16 |  |  |  |  | PTBP3        |  |
| V3SVHSHC_5431100  | STK10        |  |  | 4.153E-16 |  |  |  |  | STK10        |  |
| V3SVHSHC_8668037  | FLJ22184     |  |  | 4.174E-16 |  |  |  |  | FLJ22184     |  |
| V3SVHSHC_4881584  | MAGEB1       |  |  | 4.193E-16 |  |  |  |  | MAGEB1       |  |
| V3SVHSHC_6504458  | STK4         |  |  | 4.207E-16 |  |  |  |  | STK4         |  |
| V3SVHSHC_6538514  | HOXA1        |  |  | 4.280E-16 |  |  |  |  | HOXA1        |  |
| V3SVHSHC_5114069  | RAC1         |  |  | 4.290E-16 |  |  |  |  | RAC1         |  |
| V3SVHSHC_10164818 | BSX          |  |  | 4.297E-16 |  |  |  |  | BSX          |  |
| V3SVHSHC_5645765  | SYN1         |  |  | 4.332E-16 |  |  |  |  | SYN1         |  |
| V3SVHSHC_6983321  | BAIAP2L2     |  |  | 4.400E-16 |  |  |  |  | BAIAP2L2     |  |
| V3SVHSHC_9261377  | BAGE5        |  |  | 4.546E-16 |  |  |  |  | BAGE5        |  |
| V3SVHSHC_7340612  | C9ORF78      |  |  | 4.570E-16 |  |  |  |  | C9ORF78      |  |
| V3SVHSHC_8048627  | UBR7         |  |  | 4.646E-16 |  |  |  |  | UBR7         |  |
| V3SVHSHC_8866961  | SIPA1L3      |  |  | 4.769E-16 |  |  |  |  | SIPA1L3      |  |
| V3SVHSHC_10664108 | NDUFA4L2     |  |  | 4.976E-16 |  |  |  |  | NDUFA4L2     |  |
| V3SVHSHC_10630151 | ZNF419       |  |  | 5.033E-16 |  |  |  |  | ZNF419       |  |
| V3SVHSHC_6806738  | VPRBP        |  |  | 5.495E-16 |  |  |  |  | VPRBP        |  |
| V3SVHSHC_10761095 | HADHB        |  |  | 5.517E-16 |  |  |  |  | HADHB        |  |



|                   |              |  |  |           |  |  |  |              |  |
|-------------------|--------------|--|--|-----------|--|--|--|--------------|--|
| V3SVHSHC_10421525 | THAP10       |  |  | 5.738E-16 |  |  |  | THAP10       |  |
| V3SVHSHC_7302794  | MLIP         |  |  | 5.867E-16 |  |  |  | MLIP         |  |
| V3SVHSHC_9997838  | LOC101060581 |  |  | 5.900E-16 |  |  |  | LOC101060581 |  |
| V3SVHSHC_8059583  | SMARCAD1     |  |  | 6.356E-16 |  |  |  | SMARCAD1     |  |
| V3SVHSHC_6847955  | PRKCD        |  |  | 6.424E-16 |  |  |  | PRKCD        |  |
| V3SVHSHC_10838249 | TCP11L2      |  |  | 6.427E-16 |  |  |  | TCP11L2      |  |
| V3SVHSHC_10632164 | UBLCP1       |  |  | 6.553E-16 |  |  |  | UBLCP1       |  |
| V3SVHSHC_8228675  | HNF4G        |  |  | 6.863E-16 |  |  |  | HNF4G        |  |
| V3SVHSHC_7641737  | CLSTN2       |  |  | 6.965E-16 |  |  |  | CLSTN2       |  |
| V3SVHSHC_8296424  | SASS6        |  |  | 7.015E-16 |  |  |  | SASS6        |  |
| V3SVHSHC_9230654  | ZNF705A      |  |  | 7.153E-16 |  |  |  | ZNF705A      |  |
| V3SVHSHC_10102943 | TTBK2        |  |  | 7.417E-16 |  |  |  | TTBK2        |  |
| V3SVHSHC_9842771  | IGFL1        |  |  | 7.583E-16 |  |  |  | IGFL1        |  |
| V3SVHSHC_8840660  | EDEM2        |  |  | 7.646E-16 |  |  |  | EDEM2        |  |
| V3SVHSHC_10311569 | RNF113A      |  |  | 7.782E-16 |  |  |  | RNF113A      |  |
| V3SVHSHC_9570191  | XIRP1        |  |  | 7.881E-16 |  |  |  | XIRP1        |  |
| V3SVHSHC_9452447  | LOC101928093 |  |  | 7.889E-16 |  |  |  | LOC101928093 |  |
| V3SVHSHC_9875639  | GYS1         |  |  | 7.967E-16 |  |  |  | GYS1         |  |
| V3SVHSHC_8111558  | TNNI3K       |  |  | 8.049E-16 |  |  |  | TNNI3K       |  |
| V3SVHSHC_7693514  | FGFBP3       |  |  | 8.143E-16 |  |  |  | FGFBP3       |  |
| V3SVHSHC_8018333  | KIF26A       |  |  | 8.194E-16 |  |  |  | KIF26A       |  |
| V3SVHSHC_7917848  | NCSTN        |  |  | 8.216E-16 |  |  |  | NCSTN        |  |
| V3SVHSHC_9193496  | CCDC177      |  |  | 8.236E-16 |  |  |  | CCDC177      |  |
| V3SVHSHC_5150930  | FRK          |  |  | 8.686E-16 |  |  |  | FRK          |  |
| V3SVHSHC_5425160  | GPR133       |  |  | 8.844E-16 |  |  |  | GPR133       |  |
| V3SVHSHC_6062192  | LMOD3        |  |  | 1.015E-15 |  |  |  | LMOD3        |  |
| V3SVHSHC_9494687  | TNFAIP1      |  |  | 1.021E-15 |  |  |  | TNFAIP1      |  |
| V3SVHSHC_6353285  | DDTL         |  |  | 1.038E-15 |  |  |  | DDTL         |  |
| V3SVHSHC_9969920  | C9ORF72      |  |  | 1.040E-15 |  |  |  | C9ORF72      |  |
| V3SVHSHC_4718102  | PDIA5        |  |  | 1.040E-15 |  |  |  | PDIA5        |  |
| V3SVHSHC_10317971 | ZIC5         |  |  | 1.052E-15 |  |  |  | ZIC5         |  |
| V3SVHSHC_7239533  | MOGAT3       |  |  | 1.067E-15 |  |  |  | MOGAT3       |  |
| V3SVHSHC_5155781  | RFPL4B       |  |  | 1.096E-15 |  |  |  | RFPL4B       |  |
| V3SVHSHC_6981638  | DOK1         |  |  | 1.120E-15 |  |  |  | DOK1         |  |
| V3SVHSHC_7775222  | DUOXA2       |  |  | 1.129E-15 |  |  |  | DUOXA2       |  |
| V3SVHSHC_9978533  | ELAC2        |  |  | 1.166E-15 |  |  |  | ELAC2        |  |
| V3SVHSHC_6055163  | XCR1         |  |  | 1.181E-15 |  |  |  | XCR1         |  |
| V3SVHSHC_6842972  | LAT          |  |  | 1.202E-15 |  |  |  | LAT          |  |
| V3SVHSHC_6427469  | METTL17      |  |  | 1.207E-15 |  |  |  | METTL17      |  |
| V3SVHSHC_9795119  | CCDC168      |  |  | 1.264E-15 |  |  |  | CCDC168      |  |
| V3SVHSHC_10828085 | HES4         |  |  | 1.272E-15 |  |  |  | HES4         |  |
| V3SVHSHC_8733608  | PNLIPRP2     |  |  | 1.274E-15 |  |  |  | PNLIPRP2     |  |
| V3SVHSHC_6668270  | PER1         |  |  | 1.288E-15 |  |  |  | PER1         |  |
| V3SVHSHC_8275238  | PCDHGB3      |  |  | 1.319E-15 |  |  |  | PCDHGB3      |  |
| V3SVHSHC_8034173  | CACNA1F      |  |  | 1.365E-15 |  |  |  | CACNA1F      |  |
| V3SVHSHC_6018467  | NDST4        |  |  | 1.366E-15 |  |  |  | NDST4        |  |
| V3SVHSHC_4973918  | FKBP7        |  |  | 1.523E-15 |  |  |  | FKBP7        |  |
| V3SVHSHC_8087864  | DFFB         |  |  | 1.563E-15 |  |  |  | DFFB         |  |
| V3SVHSHC_7579037  | ELMO3        |  |  | 1.579E-15 |  |  |  | ELMO3        |  |
| V3SVHSHC_7100900  | FCRL1        |  |  | 1.632E-15 |  |  |  | FCRL1        |  |
| V3SVHSHC_7986191  | HGFAC        |  |  | 1.635E-15 |  |  |  | HGFAC        |  |
| V3SVHSHC_9782876  | MAPK8IP1     |  |  | 1.704E-15 |  |  |  | MAPK8IP1     |  |

|                   |          |  |  |           |  |  |  |  |          |  |
|-------------------|----------|--|--|-----------|--|--|--|--|----------|--|
| V3SVHSHC_7351007  | CKM      |  |  | 1.726E-15 |  |  |  |  | CKM      |  |
| V3SVHSHC_10407203 | RFTN1    |  |  | 1.739E-15 |  |  |  |  | RFTN1    |  |
| V3SVHSHC_6908510  | NPHP1    |  |  | 1.793E-15 |  |  |  |  | NPHP1    |  |
| V3SVHSHC_10844948 | NKG7     |  |  | 1.827E-15 |  |  |  |  | NKG7     |  |
| V3SVHSHC_9165908  | SERPINE3 |  |  | 1.837E-15 |  |  |  |  | SERPINE3 |  |
| V3SVHSHC_5318999  | FHIT     |  |  | 1.857E-15 |  |  |  |  | FHIT     |  |
| V3SVHSHC_10761458 | GRAMD2   |  |  | 1.906E-15 |  |  |  |  | GRAMD2   |  |
| V3SVHSHC_7088855  | GATA6    |  |  | 1.925E-15 |  |  |  |  | GATA6    |  |
| V3SVHSHC_8027771  | EFCAB3   |  |  | 2.032E-15 |  |  |  |  | EFCAB3   |  |
| V3SVHSHC_9457595  | PDE9A    |  |  | 2.060E-15 |  |  |  |  | PDE9A    |  |
| V3SVHSHC_7079648  | GOLGA8M  |  |  | 2.113E-15 |  |  |  |  | GOLGA8M  |  |
| V3SVHSHC_10295069 | SMIM7    |  |  | 2.148E-15 |  |  |  |  | SMIM7    |  |
| V3SVHSHC_10201679 | KCNA1    |  |  | 2.175E-15 |  |  |  |  | KCNA1    |  |
| V3SVHSHC_9997706  | SLC22A2  |  |  | 2.186E-15 |  |  |  |  | SLC22A2  |  |
| V3SVHSHC_6335795  | SLC44A4  |  |  | 2.191E-15 |  |  |  |  | SLC44A4  |  |
| V3SVHSHC_5716781  | MRGPRX3  |  |  | 2.208E-15 |  |  |  |  | MRGPRX3  |  |
| V3SVHSHC_9351401  | BGN      |  |  | 2.248E-15 |  |  |  |  | BGN      |  |
| V3SVHSHC_6568973  | PDE1B    |  |  | 2.253E-15 |  |  |  |  | PDE1B    |  |
| V3SVHSHC_7061795  | NUMA1    |  |  | 2.276E-15 |  |  |  |  | NUMA1    |  |
| V3SVHSHC_7463669  | IFT20    |  |  | 2.322E-15 |  |  |  |  | IFT20    |  |
| V3SVHSHC_6955238  | FOXA3    |  |  | 2.387E-15 |  |  |  |  | FOXA3    |  |
| V3SVHSHC_8046548  | RAB3B    |  |  | 2.404E-15 |  |  |  |  | RAB3B    |  |
| V3SVHSHC_9075818  | KLF1     |  |  | 2.439E-15 |  |  |  |  | KLF1     |  |
| V3SVHSHC_5645996  | NRSN2    |  |  | 2.520E-15 |  |  |  |  | NRSN2    |  |
| V3SVHSHC_10499075 | MIEF2    |  |  | 2.551E-15 |  |  |  |  | MIEF2    |  |
| V3SVHSHC_8257121  | TYRP1    |  |  | 2.593E-15 |  |  |  |  | TYRP1    |  |
| V3SVHSHC_7770833  | POLN     |  |  | 2.596E-15 |  |  |  |  | POLN     |  |
| V3SVHSHC_6395162  | TRDMT1   |  |  | 2.611E-15 |  |  |  |  | TRDMT1   |  |
| V3SVHSHC_6150962  | RGS12    |  |  | 2.675E-15 |  |  |  |  | RGS12    |  |
| V3SVHSHC_5339921  | CDH10    |  |  | 2.728E-15 |  |  |  |  | CDH10    |  |
| V3SVHSHC_10839404 | HN1L     |  |  | 2.745E-15 |  |  |  |  | HN1L     |  |
| V3SVHSHC_10111721 | LRRC70   |  |  | 2.787E-15 |  |  |  |  | LRRC70   |  |
| V3SVHSHC_9931178  | CDCA7L   |  |  | 2.979E-15 |  |  |  |  | CDCA7L   |  |
| V3SVHSHC_7121690  | P2RY8    |  |  | 3.069E-15 |  |  |  |  | P2RY8    |  |
| V3SVHSHC_6549602  | LTBP3    |  |  | 3.069E-15 |  |  |  |  | LTBP3    |  |
| V3SVHSHC_9394334  | RNF133   |  |  | 3.400E-15 |  |  |  |  | RNF133   |  |
| V3SVHSHC_5777369  | SCN3B    |  |  | 3.479E-15 |  |  |  |  | SCN3B    |  |
| V3SVHSHC_9796142  | CCDC59   |  |  | 3.494E-15 |  |  |  |  | CCDC59   |  |
| V3SVHSHC_5587454  | RASAL3   |  |  | 3.500E-15 |  |  |  |  | RASAL3   |  |
| V3SVHSHC_9391430  | XPO5     |  |  | 3.519E-15 |  |  |  |  | XPO5     |  |
| V3SVHSHC_9366152  | KIAA1257 |  |  | 3.520E-15 |  |  |  |  | KIAA1257 |  |
| V3SVHSHC_8248574  | RBP4     |  |  | 3.633E-15 |  |  |  |  | RBP4     |  |
| V3SVHSHC_4908017  | ZFAND1   |  |  | 3.690E-15 |  |  |  |  | ZFAND1   |  |
| V3SVHSHC_8290088  | ZNF410   |  |  | 3.731E-15 |  |  |  |  | ZNF410   |  |
| V3SVHSHC_6246497  | CACNA1E  |  |  | 3.804E-15 |  |  |  |  | CACNA1E  |  |
| V3SVHSHC_8978996  | DNAJC17  |  |  | 3.808E-15 |  |  |  |  | DNAJC17  |  |
| V3SVHSHC_6834524  | APLN     |  |  | 3.821E-15 |  |  |  |  | APLN     |  |
| V3SVHSHC_5750804  | Tctex1d2 |  |  | 4.071E-15 |  |  |  |  | Tctex1d2 |  |
| V3SVHSHC_7659458  | SYNJ2    |  |  | 4.137E-15 |  |  |  |  | SYNJ2    |  |
| V3SVHSHC_10012061 | C1S      |  |  | 4.207E-15 |  |  |  |  | C1S      |  |
| V3SVHSHC_5375033  | PLD6     |  |  | 4.389E-15 |  |  |  |  | PLD6     |  |
| V3SVHSHC_5624975  | ANKRD37  |  |  | 4.416E-15 |  |  |  |  | ANKRD37  |  |
| V3SVHSHC_6513005  | MYOD1    |  |  | 4.446E-15 |  |  |  |  | MYOD1    |  |
| V3SVHSHC_8797331  | ARL4D    |  |  | 4.491E-15 |  |  |  |  | ARL4D    |  |

|                   |              |  |  |           |           |  |  |              |  |
|-------------------|--------------|--|--|-----------|-----------|--|--|--------------|--|
| V3SVHSHC_8828879  | ANKK1        |  |  | 4.503E-15 |           |  |  | ANKK1        |  |
| V3SVHSHC_10014866 | MOXD1        |  |  | 4.647E-15 |           |  |  | MOXD1        |  |
| V3SVHSHC_9403574  | SLCO3A1      |  |  | 4.970E-15 |           |  |  | SLCO3A1      |  |
| V3SVHSHC_10561775 | EFNA3        |  |  | 5.019E-15 |           |  |  | EFNA3        |  |
| V3SVHSHC_9789773  | C11orf82     |  |  | 5.024E-15 |           |  |  | C11orf82     |  |
| V3SVHSHC_9785417  | SLC39A12     |  |  | 5.138E-15 |           |  |  | SLC39A12     |  |
| V3SVHSHC_10519238 | BOD1L2       |  |  | 5.157E-15 |           |  |  | BOD1L2       |  |
| V3SVHSHC_8295500  | NUP133       |  |  | 5.254E-15 |           |  |  | NUP133       |  |
| V3SVHSHC_5729420  | TMEM211      |  |  | 5.339E-15 |           |  |  | TMEM211      |  |
| V3SVHSHC_7359521  | ATIC         |  |  | 5.366E-15 |           |  |  | ATIC         |  |
| V3SVHSHC_8100008  | RYBP         |  |  | 5.481E-15 |           |  |  | RYBP         |  |
| V3SVHSHC_10119080 | IL21         |  |  | 5.579E-15 |           |  |  | IL21         |  |
| V3SVHSHC_10536266 | TCEANC2      |  |  | 5.775E-15 |           |  |  | TCEANC2      |  |
| V3SVHSHC_9925964  | CCDC27       |  |  | 5.886E-15 |           |  |  | CCDC27       |  |
| V3SVHSHC_10847819 | ATF6         |  |  | 6.123E-15 |           |  |  | ATF6         |  |
| V3SVHSHC_5590952  | WDR31        |  |  | 6.172E-15 |           |  |  | WDR31        |  |
| V3SVHSHC_10034039 | ACTR3C       |  |  | 6.257E-15 |           |  |  | ACTR3C       |  |
| V3SVHSHC_7125617  | LPPR2        |  |  | 6.377E-15 |           |  |  | LPPR2        |  |
| V3SVHSHC_7257749  | CBFA2T2      |  |  | 6.524E-15 |           |  |  | CBFA2T2      |  |
| V3SVHSHC_7046219  | EMP1         |  |  | 6.588E-15 |           |  |  | EMP1         |  |
| V3SVHSHC_5474033  | ZC3H12C      |  |  | 6.680E-15 |           |  |  | ZC3H12C      |  |
| V3SVHSHC_4899107  | Hrct1        |  |  | 6.825E-15 |           |  |  | Hrct1        |  |
| V3SVHSHC_4918346  | Rnls         |  |  | 7.007E-15 |           |  |  | Rnls         |  |
| V3SVHSHC_10538906 | ANKRD1       |  |  | 7.047E-15 |           |  |  | ANKRD1       |  |
| V3SVHSHC_5651639  | TDRD1        |  |  | 7.104E-15 |           |  |  | TDRD1        |  |
| V3SVHSHC_7934282  | OCA2         |  |  | 7.119E-15 |           |  |  | OCA2         |  |
| V3SVHSHC_6708728  | TSC22D3      |  |  | 7.619E-15 |           |  |  | TSC22D3      |  |
| V3SVHSHC_10756442 | TBC1D16      |  |  | 7.711E-15 |           |  |  | TBC1D16      |  |
| V3SVHSHC_6317711  | RASA1        |  |  | 8.046E-15 |           |  |  | RASA1        |  |
| V3SVHSHC_10044896 | GNL1         |  |  | 8.351E-15 | 2.605E-01 |  |  | GNL1         |  |
| V3SVHSHC_8646521  | PCDHGB5      |  |  | 8.402E-15 |           |  |  | PCDHGB5      |  |
| V3SVHSHC_5348072  | EFCAB7       |  |  | 8.435E-15 |           |  |  | EFCAB7       |  |
| V3SVHSHC_7791392  | C16orf74     |  |  | 8.545E-15 |           |  |  | C16orf74     |  |
| V3SVHSHC_8646851  | GANAB        |  |  | 8.670E-15 |           |  |  | GANAB        |  |
| V3SVHSHC_6188879  | OFCC1        |  |  | 8.841E-15 |           |  |  | OFCC1        |  |
| V3SVHSHC_8713577  | MFSD4        |  |  | 8.924E-15 |           |  |  | MFSD4        |  |
| V3SVHSHC_6242141  | PIWIL1       |  |  | 8.947E-15 |           |  |  | PIWIL1       |  |
| V3SVHSHC_6915275  | SH3PXD2B     |  |  | 8.989E-15 |           |  |  | SH3PXD2B     |  |
| V3SVHSHC_9079019  | VCY          |  |  | 9.076E-15 |           |  |  | VCY          |  |
| V3SVHSHC_10426871 | Erlec1       |  |  | 9.161E-15 |           |  |  | Erlec1       |  |
| V3SVHSHC_6993914  | GALNT18      |  |  | 9.426E-15 |           |  |  | GALNT18      |  |
| V3SVHSHC_6764993  | KIF20B       |  |  | 1.016E-14 |           |  |  | KIF20B       |  |
| V3SVHSHC_5358302  | TTLL12       |  |  | 1.045E-14 |           |  |  | TTLL12       |  |
| V3SVHSHC_9848183  | LOC101929936 |  |  | 1.064E-14 |           |  |  | LOC101929936 |  |
| V3SVHSHC_9252830  | KIAA1210     |  |  | 1.100E-14 |           |  |  | KIAA1210     |  |
| V3SVHSHC_7831058  | MS4A7        |  |  | 1.119E-14 |           |  |  | MS4A7        |  |
| V3SVHSHC_5116082  | EMC10        |  |  | 1.141E-14 |           |  |  | EMC10        |  |
| V3SVHSHC_8302199  | AFTPH        |  |  | 1.228E-14 |           |  |  | AFTPH        |  |
| V3SVHSHC_5906795  | PUS10        |  |  | 1.234E-14 |           |  |  | PUS10        |  |
| V3SVHSHC_5936693  | FADS2        |  |  | 1.239E-14 |           |  |  | FADS2        |  |
| V3SVHSHC_7659755  | TNFSF11      |  |  | 1.268E-14 |           |  |  | TNFSF11      |  |
| V3SVHSHC_9529997  | WWC2         |  |  | 1.301E-14 |           |  |  | WWC2         |  |

|                   |              |  |  |           |           |  |  |  |              |        |
|-------------------|--------------|--|--|-----------|-----------|--|--|--|--------------|--------|
| V3SVHSHC_7567520  | LOC100131107 |  |  | 1.330E-14 |           |  |  |  | LOC100131107 |        |
| V3SVHSHC_8809970  | NRP1         |  |  | 1.336E-14 |           |  |  |  | NRP1         |        |
| V3SVHSHC_9899663  | CDY2A        |  |  | 1.344E-14 |           |  |  |  | CDY2A        |        |
| V3SVHSHC_8406446  | MAG          |  |  | 1.372E-14 |           |  |  |  | MAG          |        |
| V3SVHSHC_10160825 | ITGA1        |  |  | 1.412E-14 |           |  |  |  | ITGA1        |        |
| V3SVHSHC_6212540  | FCER1G       |  |  | 1.417E-14 |           |  |  |  | FCER1G       |        |
| V3SVHSHC_8604974  | PROSC        |  |  | 1.434E-14 |           |  |  |  | PROSC        |        |
| V3SVHSHC_4889900  | UNC5B        |  |  | 1.479E-14 |           |  |  |  | UNC5B        |        |
| V3SVHSHC_9379847  | PSD3         |  |  | 1.504E-14 |           |  |  |  | PSD3         |        |
| V3SVHSHC_6370874  | DLGAP1       |  |  | 1.531E-14 | 2.519E-07 |  |  |  | DLGAP1       | DLGAP1 |
| V3SVHSHC_5348501  | CNTN6        |  |  | 1.557E-14 |           |  |  |  | CNTN6        |        |
| V3SVHSHC_5339756  | PPL          |  |  | 1.558E-14 |           |  |  |  | PPL          |        |
| V3SVHSHC_8777069  | EPRS         |  |  | 1.561E-14 |           |  |  |  | EPRS         |        |
| V3SVHSHC_5744270  | LOC101928044 |  |  | 1.633E-14 |           |  |  |  | LOC101928044 |        |
| V3SVHSHC_6938408  | ZNF485       |  |  | 1.701E-14 |           |  |  |  | ZNF485       |        |
| V3SVHSHC_5888249  | TRABD2B      |  |  | 1.709E-14 |           |  |  |  | TRABD2B      |        |
| V3SVHSHC_4911878  | NXF1         |  |  | 1.725E-14 |           |  |  |  | NXF1         |        |
| V3SVHSHC_7859768  | PLCL2        |  |  | 1.730E-14 |           |  |  |  | PLCL2        |        |
| V3SVHSHC_7058462  | S100A10      |  |  | 1.784E-14 |           |  |  |  | S100A10      |        |
| V3SVHSHC_7934447  | RNFT2        |  |  | 1.818E-14 |           |  |  |  | RNFT2        |        |
| V3SVHSHC_5455751  | TBCB         |  |  | 1.849E-14 |           |  |  |  | TBCB         |        |
| V3SVHSHC_4784762  | NAV3         |  |  | 1.911E-14 |           |  |  |  | NAV3         |        |
| V3SVHSHC_7233923  | MTR          |  |  | 1.935E-14 |           |  |  |  | MTR          |        |
| V3SVHSHC_6998831  | SLITRK2      |  |  | 1.953E-14 |           |  |  |  | SLITRK2      |        |
| V3SVHSHC_8986619  | PIGR         |  |  | 1.957E-14 |           |  |  |  | PIGR         |        |
| V3SVHSHC_5800799  | STAT1        |  |  | 1.969E-14 |           |  |  |  | STAT1        |        |
| V3SVHSHC_10638203 | LHX4         |  |  | 2.010E-14 |           |  |  |  | LHX4         |        |
| V3SVHSHC_7837163  | NMRK2        |  |  | 2.057E-14 |           |  |  |  | NMRK2        |        |
| V3SVHSHC_5275505  | AMER2        |  |  | 2.115E-14 |           |  |  |  | AMER2        |        |
| V3SVHSHC_9968897  | LOC100996318 |  |  | 2.149E-14 |           |  |  |  | LOC100996318 |        |
| V3SVHSHC_6789380  | ABHD13       |  |  | 2.207E-14 |           |  |  |  | ABHD13       |        |
| V3SVHSHC_10360904 | CDK10        |  |  | 2.335E-14 |           |  |  |  | CDK10        |        |
| V3SVHSHC_8190329  | SCGN         |  |  | 2.350E-14 |           |  |  |  | SCGN         |        |
| V3SVHSHC_9331139  | KPRP         |  |  | 2.356E-14 |           |  |  |  | KPRP         |        |
| V3SVHSHC_7799378  | COG2         |  |  | 2.364E-14 |           |  |  |  | COG2         |        |
| V3SVHSHC_8656025  | ZNF443       |  |  | 2.376E-14 |           |  |  |  | ZNF443       |        |
| V3SVHSHC_9515939  | PCDH12       |  |  | 2.444E-14 |           |  |  |  | PCDH12       |        |
| V3SVHSHC_9177293  | STK25        |  |  | 2.456E-14 |           |  |  |  | STK25        |        |
| V3SVHSHC_7380707  | RASSF4       |  |  | 2.537E-14 |           |  |  |  | RASSF4       |        |
| V3SVHSHC_6905243  | DLL3         |  |  | 2.538E-14 |           |  |  |  | DLL3         |        |
| V3SVHSHC_9407303  | VEGFA        |  |  | 2.555E-14 |           |  |  |  | VEGFA        |        |
| V3SVHSHC_6371963  | CXCL9        |  |  | 2.566E-14 |           |  |  |  | CXCL9        |        |
| V3SVHSHC_8067371  | WFIKK1       |  |  | 2.606E-14 |           |  |  |  | WFIKK1       |        |
| V3SVHSHC_7129214  | OR6M1        |  |  | 2.697E-14 |           |  |  |  | OR6M1        |        |
| V3SVHSHC_10437035 | ATP9A        |  |  | 2.847E-14 |           |  |  |  | ATP9A        |        |
| V3SVHSHC_4988933  | SYT6         |  |  | 2.909E-14 |           |  |  |  | SYT6         |        |
| V3SVHSHC_9364040  | CCL3L3       |  |  | 2.951E-14 |           |  |  |  | CCL3L3       |        |
| V3SVHSHC_4957022  | SLC32A1      |  |  | 2.998E-14 |           |  |  |  | SLC32A1      |        |
| V3SVHSHC_4946363  | IL2RA        |  |  | 3.005E-14 |           |  |  |  | IL2RA        |        |
| V3SVHSHC_9117068  | RAD23B       |  |  | 3.145E-14 |           |  |  |  | RAD23B       |        |
| V3SVHSHC_6963521  | KRTAP10-8    |  |  | 3.185E-14 |           |  |  |  | KRTAP10-8    |        |

|                   |          |  |  |           |           |  |  |          |        |
|-------------------|----------|--|--|-----------|-----------|--|--|----------|--------|
| V3SVHSHC_7081826  | SORBS2   |  |  | 3.313E-14 |           |  |  | SORBS2   |        |
| V3SVHSHC_4805288  | MSH4     |  |  | 3.360E-14 |           |  |  | MSH4     |        |
| V3SVHSHC_8856137  | SLC2A13  |  |  | 3.383E-14 |           |  |  | SLC2A13  |        |
| V3SVHSHC_7225706  | RAB17    |  |  | 3.425E-14 |           |  |  | RAB17    |        |
| V3SVHSHC_4814198  | CITED2   |  |  | 3.452E-14 |           |  |  | CITED2   |        |
| V3SVHSHC_9780830  | MAP3K6   |  |  | 3.479E-14 |           |  |  | MAP3K6   |        |
| V3SVHSHC_7680809  | OPTN     |  |  | 3.607E-14 |           |  |  | OPTN     |        |
| V3SVHSHC_9666518  | GPSM3    |  |  | 3.629E-14 |           |  |  | GPSM3    |        |
| V3SVHSHC_10471454 | Gpn1     |  |  | 3.717E-14 |           |  |  | Gpn1     |        |
| V3SVHSHC_10598603 | FUT7     |  |  | 3.745E-14 |           |  |  | FUT7     |        |
| V3SVHSHC_7243130  | ZNF331   |  |  | 3.800E-14 |           |  |  | ZNF331   |        |
| V3SVHSHC_7507427  | FAM45A   |  |  | 3.855E-14 |           |  |  | FAM45A   |        |
| V3SVHSHC_8534651  | DUSP8    |  |  | 3.912E-14 |           |  |  | DUSP8    |        |
| V3SVHSHC_5177495  | IDNK     |  |  | 3.959E-14 |           |  |  | IDNK     |        |
| V3SVHSHC_4900361  | PPARGC1B |  |  | 4.039E-14 |           |  |  | PPARGC1B |        |
| V3SVHSHC_7323683  | LBX1     |  |  | 4.144E-14 |           |  |  | LBX1     |        |
| V3SVHSHC_9484523  | FAM188B  |  |  | 4.148E-14 |           |  |  | FAM188B  |        |
| V3SVHSHC_10534418 | MCM10    |  |  | 4.253E-14 |           |  |  | MCM10    |        |
| V3SVHSHC_7202111  | NKX2-4   |  |  | 4.295E-14 |           |  |  | NKX2-4   |        |
| V3SVHSHC_5405327  | TBC1D2   |  |  | 4.423E-14 |           |  |  | TBC1D2   |        |
| V3SVHSHC_5922107  | PCIF1    |  |  | 4.433E-14 |           |  |  | PCIF1    |        |
| V3SVHSHC_8270783  | RAPGEF5  |  |  | 4.648E-14 |           |  |  | RAPGEF5  |        |
| V3SVHSHC_7506866  | LPCAT4   |  |  | 4.742E-14 |           |  |  | LPCAT4   |        |
| V3SVHSHC_6354341  | CSF1     |  |  | 4.934E-14 |           |  |  | CSF1     |        |
| V3SVHSHC_4957319  | CIART    |  |  | 5.087E-14 |           |  |  | CIART    |        |
| V3SVHSHC_10632857 | ASB14    |  |  | 5.126E-14 |           |  |  | ASB14    |        |
| V3SVHSHC_9899069  | SLC9A4   |  |  | 5.154E-14 |           |  |  | SLC9A4   |        |
| V3SVHSHC_6452648  | SEZ6L2   |  |  | 5.326E-14 |           |  |  | SEZ6L2   |        |
| V3SVHSHC_7863662  | SPATA8   |  |  | 5.641E-14 |           |  |  | SPATA8   |        |
| V3SVHSHC_6078989  | BAIAP3   |  |  | 5.668E-14 |           |  |  | BAIAP3   |        |
| V3SVHSHC_4816244  | CCM2L    |  |  | 6.026E-14 |           |  |  | CCM2L    |        |
| V3SVHSHC_5745029  | ZBTB32   |  |  | 6.060E-14 |           |  |  | ZBTB32   |        |
| V3SVHSHC_5079320  | C2orf81  |  |  | 6.191E-14 |           |  |  | C2orf81  |        |
| V3SVHSHC_7787960  | C12ORF10 |  |  | 6.380E-14 |           |  |  | C12ORF10 |        |
| V3SVHSHC_8201351  | KLK15    |  |  | 6.938E-14 |           |  |  | KLK15    |        |
| V3SVHSHC_5961608  | TAF7L    |  |  | 6.946E-14 |           |  |  | TAF7L    |        |
| V3SVHSHC_9703874  | REG3G    |  |  | 7.092E-14 |           |  |  | REG3G    |        |
| V3SVHSHC_7400804  | OR5AS1   |  |  | 7.167E-14 | 9.492E-06 |  |  | OR5AS1   | OR5AS1 |
| V3SVHSHC_7117400  | PIK3CA   |  |  | 7.224E-14 |           |  |  | PIK3CA   |        |
| V3SVHSHC_9378593  | ADAM29   |  |  | 7.289E-14 |           |  |  | ADAM29   |        |
| V3SVHSHC_8265239  | FGFR3    |  |  | 7.355E-14 |           |  |  | FGFR3    |        |
| V3SVHSHC_5231120  | RANBP9   |  |  | 7.729E-14 |           |  |  | RANBP9   |        |
| V3SVHSHC_10339289 | MAN2A1   |  |  | 7.756E-14 |           |  |  | MAN2A1   |        |
| V3SVHSHC_9250454  | TRIM43B  |  |  | 7.823E-14 |           |  |  | TRIM43B  |        |
| V3SVHSHC_8614016  | TMEM11   |  |  | 7.921E-14 |           |  |  | TMEM11   |        |
| V3SVHSHC_6302795  | ATF6B    |  |  | 8.081E-14 |           |  |  | ATF6B    |        |
| V3SVHSHC_10847456 | NT5C1A   |  |  | 8.103E-14 |           |  |  | NT5C1A   |        |
| V3SVHSHC_5036222  | GLIS2    |  |  | 8.307E-14 |           |  |  | GLIS2    |        |
| V3SVHSHC_10694468 | THAP7    |  |  | 8.334E-14 |           |  |  | THAP7    |        |
| V3SVHSHC_7199801  | SNURF    |  |  | 8.462E-14 |           |  |  | SNURF    |        |
| V3SVHSHC_8400605  | ZFYVE16  |  |  | 8.584E-14 |           |  |  | ZFYVE16  |        |
| V3SVHSHC_7685462  | IGSF23   |  |  | 8.727E-14 |           |  |  | IGSF23   |        |

|                   |              |  |  |           |  |  |  |              |  |
|-------------------|--------------|--|--|-----------|--|--|--|--------------|--|
| V3SVHSHC_9487658  | LOC101929805 |  |  | 9.338E-14 |  |  |  | LOC101929805 |  |
| V3SVHSHC_5114201  | RNASE12      |  |  | 9.484E-14 |  |  |  | RNASE12      |  |
| V3SVHSHC_9798947  | SAA2-SAA4    |  |  | 9.655E-14 |  |  |  | SAA2-SAA4    |  |
| V3SVHSHC_9735257  | GPA33        |  |  | 9.859E-14 |  |  |  | GPA33        |  |
| V3SVHSHC_10279295 | PIK3IP1      |  |  | 9.885E-14 |  |  |  | PIK3IP1      |  |
| V3SVHSHC_6396119  | TRIM17       |  |  | 1.018E-13 |  |  |  | TRIM17       |  |
| V3SVHSHC_10546991 | TMEM251      |  |  | 1.021E-13 |  |  |  | TMEM251      |  |
| V3SVHSHC_7576892  | NAA60        |  |  | 1.029E-13 |  |  |  | NAA60        |  |
| V3SVHSHC_6437798  | LRRC6        |  |  | 1.036E-13 |  |  |  | LRRC6        |  |
| V3SVHSHC_6984971  | TRMT2A       |  |  | 1.042E-13 |  |  |  | TRMT2A       |  |
| V3SVHSHC_5200496  | SP5          |  |  | 1.095E-13 |  |  |  | SP5          |  |
| V3SVHSHC_8915009  | PTRH2        |  |  | 1.100E-13 |  |  |  | PTRH2        |  |
| V3SVHSHC_1046407  | RIPK2        |  |  | 1.114E-13 |  |  |  | RIPK2        |  |
| V3SVHSHC_6125453  | FAM19A1      |  |  | 1.121E-13 |  |  |  | FAM19A1      |  |
| V3SVHSHC_6648998  | LOC646862    |  |  | 1.164E-13 |  |  |  | LOC646862    |  |
| V3SVHSHC_7179506  | HSF2BP       |  |  | 1.226E-13 |  |  |  | HSF2BP       |  |
| V3SVHSHC_6808190  | C2orf40      |  |  | 1.228E-13 |  |  |  | C2orf40      |  |
| V3SVHSHC_5726681  | CHCHD6       |  |  | 1.259E-13 |  |  |  | CHCHD6       |  |
| V3SVHSHC_8864354  | C14ORF2      |  |  | 1.295E-13 |  |  |  | C14ORF2      |  |
| V3SVHSHC_8408789  | ZFY          |  |  | 1.331E-13 |  |  |  | ZFY          |  |
| V3SVHSHC_6091430  | LPO          |  |  | 1.346E-13 |  |  |  | LPO          |  |
| V3SVHSHC_8354801  | LOC101930295 |  |  | 1.357E-13 |  |  |  | LOC101930295 |  |
| V3SVHSHC_9101756  | C5orf54      |  |  | 1.364E-13 |  |  |  | C5orf54      |  |
| V3SVHSHC_7356749  | ASCL1        |  |  | 1.384E-13 |  |  |  | ASCL1        |  |
| V3SVHSHC_6922865  | RBPMS        |  |  | 1.404E-13 |  |  |  | RBPMS        |  |
| V3SVHSHC_6030875  | GNB4         |  |  | 1.423E-13 |  |  |  | GNB4         |  |
| V3SVHSHC_9764000  | TMEM158      |  |  | 1.497E-13 |  |  |  | TMEM158      |  |
| V3SVHSHC_7849538  | HIGD1B       |  |  | 1.501E-13 |  |  |  | HIGD1B       |  |
| V3SVHSHC_6273920  | TUBGCP6      |  |  | 1.501E-13 |  |  |  | TUBGCP6      |  |
| V3SVHSHC_7661273  | PSD4         |  |  | 1.522E-13 |  |  |  | PSD4         |  |
| V3SVHSHC_8351039  | PCBD2        |  |  | 1.537E-13 |  |  |  | PCBD2        |  |
| V3SVHSHC_10129376 | SRSF3        |  |  | 1.548E-13 |  |  |  | SRSF3        |  |
| V3SVHSHC_10247153 | ANG          |  |  | 1.568E-13 |  |  |  | ANG          |  |
| V3SVHSHC_8353547  | SCRT1        |  |  | 1.601E-13 |  |  |  | SCRT1        |  |
| V3SVHSHC_7374767  | CHRM1        |  |  | 1.699E-13 |  |  |  | CHRM1        |  |
| V3SVHSHC_10655033 | RGMB         |  |  | 1.729E-13 |  |  |  | RGMB         |  |
| V3SVHSHC_10746047 | MBD1         |  |  | 1.729E-13 |  |  |  | MBD1         |  |
| V3SVHSHC_6132185  | ELF3         |  |  | 1.777E-13 |  |  |  | ELF3         |  |
| V3SVHSHC_7571612  | RLN1         |  |  | 1.858E-13 |  |  |  | RLN1         |  |
| V3SVHSHC_7891844  | UBE2E2       |  |  | 1.861E-13 |  |  |  | UBE2E2       |  |
| V3SVHSHC_6038069  | POLR2C       |  |  | 1.870E-13 |  |  |  | POLR2C       |  |
| V3SVHSHC_6852476  | DHDH         |  |  | 1.940E-13 |  |  |  | DHDH         |  |
| V3SVHSHC_7113209  | GJB1         |  |  | 1.940E-13 |  |  |  | GJB1         |  |
| V3SVHSHC_9637016  | CHCHD7       |  |  | 1.977E-13 |  |  |  | CHCHD7       |  |
| V3SVHSHC_8596592  | TNFRSF21     |  |  | 2.003E-13 |  |  |  | TNFRSF21     |  |
| V3SVHSHC_5821919  | ADCY5        |  |  | 2.026E-13 |  |  |  | ADCY5        |  |
| V3SVHSHC_9888806  | TAAR6        |  |  | 2.031E-13 |  |  |  | TAAR6        |  |
| V3SVHSHC_10019387 | STARD10      |  |  | 2.031E-13 |  |  |  | STARD10      |  |
| V3SVHSHC_10341830 | CHRA1        |  |  | 2.041E-13 |  |  |  | CHRA1        |  |
| V3SVHSHC_10436045 | GNA11        |  |  | 2.047E-13 |  |  |  | GNA11        |  |

|                   |              |  |  |           |           |  |  |              |       |
|-------------------|--------------|--|--|-----------|-----------|--|--|--------------|-------|
| V3SVHSHC_6184655  | ZNF518A      |  |  | 2.123E-13 |           |  |  | ZNF518A      |       |
| V3SVHSHC_7148255  | HAUS6        |  |  | 2.146E-13 |           |  |  | HAUS6        |       |
| V3SVHSHC_10113107 | ATP6V0E1     |  |  | 2.240E-13 |           |  |  | ATP6V0E1     |       |
| V3SVHSHC_8409581  | SYT13        |  |  | 2.256E-13 |           |  |  | SYT13        |       |
| V3SVHSHC_9655958  | S100A7A      |  |  | 2.272E-13 |           |  |  | S100A7A      |       |
| V3SVHSHC_9398195  | OPTN         |  |  | 2.292E-13 |           |  |  | OPTN         |       |
| V3SVHSHC_6970253  | ZNF17        |  |  | 2.292E-13 |           |  |  | ZNF17        |       |
| V3SVHSHC_8982197  | LOC101060580 |  |  | 2.321E-13 |           |  |  | LOC101060580 |       |
| V3SVHSHC_9962924  | PRDM4        |  |  | 2.583E-13 |           |  |  | PRDM4        |       |
| V3SVHSHC_7669886  | QRFPR        |  |  | 2.607E-13 |           |  |  | QRFPR        |       |
| V3SVHSHC_8455979  | CDRT15       |  |  | 2.662E-13 |           |  |  | CDRT15       |       |
| V3SVHSHC_5195546  | TMEM52B      |  |  | 2.740E-13 |           |  |  | TMEM52B      |       |
| V3SVHSHC_6367079  | RPL10        |  |  | 2.742E-13 |           |  |  | RPL10        |       |
| V3SVHSHC_9194453  | CDC42BPG     |  |  | 2.826E-13 |           |  |  | CDC42BPG     |       |
| V3SVHSHC_4641245  | C2orf88      |  |  | 2.849E-13 |           |  |  | C2orf88      |       |
| V3SVHSHC_6501785  | PUM2         |  |  | 2.890E-13 | 6.852E-10 |  |  | PUM2         | PUM2  |
| V3SVHSHC_7433738  | DDX11        |  |  | 2.894E-13 |           |  |  | DDX11        |       |
| V3SVHSHC_6689324  | TPTE         |  |  | 2.956E-13 |           |  |  | TPTE         |       |
| V3SVHSHC_8302760  | PHLDA3       |  |  | 2.992E-13 |           |  |  | PHLDA3       |       |
| V3SVHSHC_10571543 | AARS         |  |  | 3.037E-13 |           |  |  | AARS         |       |
| V3SVHSHC_5276000  | CSNK1D       |  |  | 3.054E-13 |           |  |  | CSNK1D       |       |
| V3SVHSHC_4763774  | OR5M9        |  |  | 3.069E-13 |           |  |  | OR5M9        |       |
| V3SVHSHC_6823370  | CASKIN1      |  |  | 3.077E-13 |           |  |  | CASKIN1      |       |
| V3SVHSHC_4713647  | POLR3F       |  |  | 3.082E-13 |           |  |  | POLR3F       |       |
| V3SVHSHC_5536469  | PPP4R2       |  |  | 3.177E-13 |           |  |  | PPP4R2       |       |
| V3SVHSHC_8165513  | C1orf95      |  |  | 3.201E-13 |           |  |  | C1orf95      |       |
| V3SVHSHC_5418725  | TYROBP       |  |  | 3.209E-13 |           |  |  | TYROBP       |       |
| V3SVHSHC_5550824  | GPA33        |  |  | 3.256E-13 |           |  |  | GPA33        |       |
| V3SVHSHC_9712751  | API5         |  |  | 3.280E-13 |           |  |  | API5         |       |
| V3SVHSHC_5897918  | AMACR        |  |  | 3.293E-13 |           |  |  | AMACR        |       |
| V3SVHSHC_6270521  | VKORC1       |  |  | 3.323E-13 | 5.039E-02 |  |  | VKORC1       |       |
| V3SVHSHC_5872442  | FBN3         |  |  | 3.453E-13 |           |  |  | FBN3         |       |
| V3SVHSHC_6152084  | ZCCHC2       |  |  | 3.583E-13 |           |  |  | ZCCHC2       |       |
| V3SVHSHC_5190794  | SUGP2        |  |  | 3.606E-13 |           |  |  | SUGP2        |       |
| V3SVHSHC_6326027  | OR7D4        |  |  | 3.637E-13 |           |  |  | OR7D4        |       |
| V3SVHSHC_7435520  | ERICH6       |  |  | 3.758E-13 |           |  |  | ERICH6       |       |
| V3SVHSHC_9130499  | ANKS3        |  |  | 3.805E-13 |           |  |  | ANKS3        |       |
| V3SVHSHC_5747141  | ARNT2        |  |  | 3.937E-13 |           |  |  | ARNT2        |       |
| V3SVHSHC_9464855  | TRIOBP       |  |  | 4.096E-13 |           |  |  | TRIOBP       |       |
| V3SVHSHC_9047042  | ANXA7        |  |  | 4.117E-13 |           |  |  | ANXA7        |       |
| V3SVHSHC_9210656  | HOXB4        |  |  | 4.174E-13 | 3.435E-15 |  |  | HOXB4        | HOXB4 |
| V3SVHSHC_9162410  | LOC100652824 |  |  | 4.295E-13 |           |  |  | LOC100652824 |       |
| V3SVHSHC_8245835  | LRRRC57      |  |  | 4.489E-13 |           |  |  | LRRRC57      |       |
| V3SVHSHC_9901148  | ST6GALNAC1   |  |  | 4.656E-13 |           |  |  | ST6GALNAC1   |       |
| V3SVHSHC_6146771  | PRSS50       |  |  | 4.768E-13 |           |  |  | PRSS50       |       |
| V3SVHSHC_6309791  | ZNF526       |  |  | 4.825E-13 |           |  |  | ZNF526       |       |
| V3SVHSHC_7452020  | ZNF19        |  |  | 4.869E-13 |           |  |  | ZNF19        |       |
| V3SVHSHC_6294941  | Ppp6r2       |  |  | 4.945E-13 |           |  |  | Ppp6r2       |       |
| V3SVHSHC_7983254  | DSG2         |  |  | 5.250E-13 |           |  |  | DSG2         |       |
| V3SVHSHC_7056053  | SELPLG       |  |  | 5.399E-13 |           |  |  | SELPLG       |       |
| V3SVHSHC_6231284  | FNDC3A       |  |  | 5.418E-13 |           |  |  | FNDC3A       |       |

|                   |              |  |  |           |           |  |  |                  |  |
|-------------------|--------------|--|--|-----------|-----------|--|--|------------------|--|
| V3SVHSHC_4744997  | RNF157       |  |  | 5.487E-13 |           |  |  | RNF157           |  |
| V3SVHSHC_6739649  | ZFYVE19      |  |  | 5.553E-13 |           |  |  | ZFYVE19          |  |
| V3SVHSHC_6802877  | FRZB         |  |  | 5.557E-13 |           |  |  | FRZB             |  |
| V3SVHSHC_7802513  | P4HTM        |  |  | 5.569E-13 |           |  |  | P4HTM            |  |
| V3SVHSHC_9410966  | PTPRH        |  |  | 5.638E-13 |           |  |  | PTPRH            |  |
| V3SVHSHC_10687769 | NDUFV1       |  |  | 5.691E-13 |           |  |  | NDUFV1           |  |
| V3SVHSHC_8330150  | TNIK         |  |  | 5.780E-13 |           |  |  | TNIK             |  |
| V3SVHSHC_6083147  | MTA1         |  |  | 5.839E-13 |           |  |  | MTA1             |  |
| V3SVHSHC_7016651  | PRSS46       |  |  | 5.904E-13 |           |  |  | PRSS46           |  |
| V3SVHSHC_4881683  | MAP2K2       |  |  | 5.911E-13 |           |  |  | MAP2K2           |  |
| V3SVHSHC_7428590  | CLVS1        |  |  | 5.983E-13 |           |  |  | CLVS1            |  |
| V3SVHSHC_6656192  | TGS1         |  |  | 6.033E-13 |           |  |  | TGS1             |  |
| V3SVHSHC_6502775  | CYP2A7       |  |  | 6.041E-13 |           |  |  | CYP2A7           |  |
| V3SVHSHC_4778591  | FAM78A       |  |  | 6.175E-13 |           |  |  | FAM78A           |  |
| V3SVHSHC_5136707  | FOXQ1        |  |  | 6.375E-13 |           |  |  | FOXQ1            |  |
| V3SVHSHC_6067505  | INPP5J       |  |  | 6.503E-13 |           |  |  | INPP5J           |  |
| V3SVHSHC_5650451  | PRPSAP2      |  |  | 6.638E-13 |           |  |  | PRPSAP2          |  |
| V3SVHSHC_9055457  | ALKBH8       |  |  | 6.723E-13 |           |  |  | ALKBH8           |  |
| V3SVHSHC_4841423  | BCOR         |  |  | 6.771E-13 |           |  |  | BCOR             |  |
| V3SVHSHC_5597156  | GPR156       |  |  | 6.778E-13 |           |  |  | GPR156           |  |
| V3SVHSHC_8656949  | OR511I       |  |  | 6.795E-13 |           |  |  | OR511I           |  |
| V3SVHSHC_7877621  | LPPR3        |  |  | 7.120E-13 |           |  |  | LPPR3            |  |
| V3SVHSHC_8198975  | ADORA2A      |  |  | 7.288E-13 |           |  |  | ADORA2A          |  |
| V3SVHSHC_7769546  | UPK1A        |  |  | 7.318E-13 |           |  |  | UPK1A            |  |
| V3SVHSHC_4910558  | TAAR1        |  |  | 7.379E-13 |           |  |  | TAAR1            |  |
| V3SVHSHC_7095950  | POLR3G       |  |  | 7.629E-13 |           |  |  | POLR3G           |  |
| V3SVHSHC_7572041  | MTHFS        |  |  | 7.693E-13 |           |  |  | MTHFS            |  |
| V3SVHSHC_8709188  | LOC101928006 |  |  | 7.731E-13 |           |  |  | LOC10192<br>8006 |  |
| V3SVHSHC_6862541  | LOC101929792 |  |  | 7.826E-13 |           |  |  | LOC10192<br>9792 |  |
| V3SVHSHC_10750205 | NRDE2        |  |  | 7.982E-13 | 1.915E-01 |  |  | NRDE2            |  |
| V3SVHSHC_7200164  | LRRC8E       |  |  | 8.099E-13 |           |  |  | LRRC8E           |  |
| V3SVHSHC_5263460  | FBXO36       |  |  | 8.582E-13 |           |  |  | FBXO36           |  |
| V3SVHSHC_8690345  | ZNF593       |  |  | 8.950E-13 |           |  |  | ZNF593           |  |
| V3SVHSHC_5452418  | IL6ST        |  |  | 9.267E-13 |           |  |  | IL6ST            |  |
| V3SVHSHC_8067866  | SURF6        |  |  | 9.414E-13 |           |  |  | SURF6            |  |
| V3SVHSHC_10214813 | TTC23        |  |  | 9.607E-13 |           |  |  | TTC23            |  |
| V3SVHSHC_10230950 | UBE3C        |  |  | 1.019E-12 |           |  |  | UBE3C            |  |
| V3SVHSHC_7085324  | XPA          |  |  | 1.050E-12 |           |  |  | XPA              |  |
| V3SVHSHC_10466042 | CDK5R1       |  |  | 1.121E-12 |           |  |  | CDK5R1           |  |
| V3SVHSHC_8455187  | RBM6         |  |  | 1.155E-12 |           |  |  | RBM6             |  |
| V3SVHSHC_7243988  | CDC42SE2     |  |  | 1.165E-12 |           |  |  | CDC42SE<br>2     |  |
| V3SVHSHC_10113371 | ARHGAP22     |  |  | 1.182E-12 |           |  |  | ARHGAP2<br>2     |  |
| V3SVHSHC_6939827  | ZNF16        |  |  | 1.257E-12 |           |  |  | ZNF16            |  |
| V3SVHSHC_8321438  | SLCO1A2      |  |  | 1.278E-12 |           |  |  | SLCO1A2          |  |
| V3SVHSHC_8166569  | ANO6         |  |  | 1.323E-12 |           |  |  | ANO6             |  |
| V3SVHSHC_9159473  | PSMF1        |  |  | 1.362E-12 |           |  |  | PSMF1            |  |
| V3SVHSHC_8936525  | CHST2        |  |  | 1.367E-12 |           |  |  | CHST2            |  |
| V3SVHSHC_5717606  | CEP170B      |  |  | 1.386E-12 |           |  |  | CEP170B          |  |
| V3SVHSHC_5707541  | LOC101929829 |  |  | 1.390E-12 |           |  |  | LOC10192<br>9829 |  |
| V3SVHSHC_7425620  | ARHGEF39     |  |  | 1.442E-12 |           |  |  | ARHGEF3<br>9     |  |



|                   |              |  |  |           |  |  |  |              |  |
|-------------------|--------------|--|--|-----------|--|--|--|--------------|--|
| V3SVHSHC_10048592 | TSPAN18      |  |  | 1.444E-12 |  |  |  | TSPAN18      |  |
| V3SVHSHC_5384702  | ARHGAP42     |  |  | 1.464E-12 |  |  |  | ARHGAP42     |  |
| V3SVHSHC_8295830  | OR13H1       |  |  | 1.525E-12 |  |  |  | OR13H1       |  |
| V3SVHSHC_8258573  | PRKG2        |  |  | 1.534E-12 |  |  |  | PRKG2        |  |
| V3SVHSHC_6416315  | SURF1        |  |  | 1.554E-12 |  |  |  | SURF1        |  |
| V3SVHSHC_6356915  | ADAM8        |  |  | 1.559E-12 |  |  |  | ADAM8        |  |
| V3SVHSHC_6739781  | RPP40        |  |  | 1.576E-12 |  |  |  | RPP40        |  |
| V3SVHSHC_9095948  | Tab1         |  |  | 1.597E-12 |  |  |  | Tab1         |  |
| V3SVHSHC_7251743  | PASK         |  |  | 1.683E-12 |  |  |  | PASK         |  |
| V3SVHSHC_8665331  | CYP2J2       |  |  | 1.693E-12 |  |  |  | CYP2J2       |  |
| V3SVHSHC_6604745  | TMEM200C     |  |  | 1.699E-12 |  |  |  | TMEM200C     |  |
| V3SVHSHC_7871615  | WDSUB1       |  |  | 1.718E-12 |  |  |  | WDSUB1       |  |
| V3SVHSHC_10207883 | NUCB2        |  |  | 1.778E-12 |  |  |  | NUCB2        |  |
| V3SVHSHC_10370045 | EFNB2        |  |  | 1.852E-12 |  |  |  | EFNB2        |  |
| V3SVHSHC_9583919  | KCNN2        |  |  | 1.856E-12 |  |  |  | KCNN2        |  |
| V3SVHSHC_10303583 | OR2A5        |  |  | 1.912E-12 |  |  |  | OR2A5        |  |
| V3SVHSHC_9812378  | TMEM210      |  |  | 1.940E-12 |  |  |  | TMEM210      |  |
| V3SVHSHC_10375028 | DHRS4L2      |  |  | 1.991E-12 |  |  |  | DHRS4L2      |  |
| V3SVHSHC_5854259  | MF12         |  |  | 2.011E-12 |  |  |  | MF12         |  |
| V3SVHSHC_8037275  | PCDHGB1      |  |  | 2.015E-12 |  |  |  | PCDHGB1      |  |
| V3SVHSHC_9889499  | EYA3         |  |  | 2.046E-12 |  |  |  | EYA3         |  |
| V3SVHSHC_5485121  | ASB16        |  |  | 2.062E-12 |  |  |  | ASB16        |  |
| V3SVHSHC_5635898  | OR1N1        |  |  | 2.094E-12 |  |  |  | OR1N1        |  |
| V3SVHSHC_9960119  | SERPINB11    |  |  | 2.141E-12 |  |  |  | SERPINB11    |  |
| V3SVHSHC_8685494  | VMO1         |  |  | 2.160E-12 |  |  |  | VMO1         |  |
| V3SVHSHC_8903525  | USP14        |  |  | 2.163E-12 |  |  |  | USP14        |  |
| V3SVHSHC_10457099 | SSBP2        |  |  | 2.180E-12 |  |  |  | SSBP2        |  |
| V3SVHSHC_8045624  | TXNDC17      |  |  | 2.186E-12 |  |  |  | TXNDC17      |  |
| V3SVHSHC_6805121  | MEPCE        |  |  | 2.208E-12 |  |  |  | MEPCE        |  |
| V3SVHSHC_9482708  | IRF2BP2      |  |  | 2.275E-12 |  |  |  | IRF2BP2      |  |
| V3SVHSHC_5469050  | FMNL1        |  |  | 2.301E-12 |  |  |  | FMNL1        |  |
| V3SVHSHC_6256496  | CD40         |  |  | 2.351E-12 |  |  |  | CD40         |  |
| V3SVHSHC_9913061  | SLC4A9       |  |  | 2.410E-12 |  |  |  | SLC4A9       |  |
| V3SVHSHC_4685927  | CSF1R        |  |  | 2.542E-12 |  |  |  | CSF1R        |  |
| V3SVHSHC_7242107  | CHDC2        |  |  | 2.549E-12 |  |  |  | CHDC2        |  |
| V3SVHSHC_5347379  | RPS6KB1      |  |  | 2.565E-12 |  |  |  | RPS6KB1      |  |
| V3SVHSHC_7402751  | RAB33A       |  |  | 2.566E-12 |  |  |  | RAB33A       |  |
| V3SVHSHC_8610683  | KPNA3        |  |  | 2.588E-12 |  |  |  | KPNA3        |  |
| V3SVHSHC_5338469  | NUP210       |  |  | 2.730E-12 |  |  |  | NUP210       |  |
| V3SVHSHC_8150465  | SMIM14       |  |  | 2.813E-12 |  |  |  | SMIM14       |  |
| V3SVHSHC_7360247  | C1GALT1      |  |  | 2.872E-12 |  |  |  | C1GALT1      |  |
| V3SVHSHC_7587386  | LOC100506248 |  |  | 2.939E-12 |  |  |  | LOC100506248 |  |
| V3SVHSHC_8722817  | WDR6         |  |  | 3.005E-12 |  |  |  | WDR6         |  |
| V3SVHSHC_7721828  | APOLD1       |  |  | 3.021E-12 |  |  |  | APOLD1       |  |
| V3SVHSHC_9131291  | CEP128       |  |  | 3.095E-12 |  |  |  | CEP128       |  |
| V3SVHSHC_5444036  | LOC101930098 |  |  | 3.168E-12 |  |  |  | LOC101930098 |  |
| V3SVHSHC_10578836 | SLC7A13      |  |  | 3.240E-12 |  |  |  | SLC7A13      |  |
| V3SVHSHC_7034108  | KRT6A        |  |  | 3.300E-12 |  |  |  | KRT6A        |  |
| V3SVHSHC_8653220  | SH3KBP1      |  |  | 3.349E-12 |  |  |  | SH3KBP1      |  |
| V3SVHSHC_8454296  | KCNJ16       |  |  | 3.353E-12 |  |  |  | KCNJ16       |  |

|                   |          |  |  |           |           |  |  |  |          |         |
|-------------------|----------|--|--|-----------|-----------|--|--|--|----------|---------|
| V3SVHSHC_9977180  | DDO      |  |  | 3.402E-12 |           |  |  |  | DDO      |         |
| V3SVHSHC_7975136  | CCDC107  |  |  | 3.402E-12 |           |  |  |  | CCDC107  |         |
| V3SVHSHC_7975499  | TFB2M    |  |  | 3.406E-12 |           |  |  |  | TFB2M    |         |
| V3SVHSHC_5439218  | ITPR1    |  |  | 3.518E-12 |           |  |  |  | ITPR1    |         |
| V3SVHSHC_8868413  | NBPF3    |  |  | 3.547E-12 |           |  |  |  | NBPF3    |         |
| V3SVHSHC_9537257  | TESK1    |  |  | 3.576E-12 |           |  |  |  | TESK1    |         |
| V3SVHSHC_6671636  | PTK7     |  |  | 3.614E-12 |           |  |  |  | PTK7     |         |
| V3SVHSHC_6298439  | MYO5B    |  |  | 3.664E-12 |           |  |  |  | MYO5B    |         |
| V3SVHSHC_6625964  | USP25    |  |  | 3.673E-12 |           |  |  |  | USP25    |         |
| V3SVHSHC_7560722  | GRM2     |  |  | 3.771E-12 |           |  |  |  | GRM2     |         |
| V3SVHSHC_7802942  | TOR1AIP1 |  |  | 3.806E-12 |           |  |  |  | TOR1AIP1 |         |
| V3SVHSHC_8740208  | ZP2      |  |  | 3.824E-12 |           |  |  |  | ZP2      |         |
| V3SVHSHC_8942168  | MCPH1    |  |  | 3.843E-12 |           |  |  |  | MCPH1    |         |
| V3SVHSHC_8613620  | FAIM3    |  |  | 4.110E-12 |           |  |  |  | FAIM3    |         |
| V3SVHSHC_7597154  | PDZD4    |  |  | 4.153E-12 |           |  |  |  | PDZD4    |         |
| V3SVHSHC_8874188  | LIPA     |  |  | 4.410E-12 |           |  |  |  | LIPA     |         |
| V3SVHSHC_8515643  | ACCSL    |  |  | 4.552E-12 |           |  |  |  | ACCSL    |         |
| V3SVHSHC_10848050 | GAB3     |  |  | 4.558E-12 |           |  |  |  | GAB3     |         |
| V3SVHSHC_9953915  | DCAF12L2 |  |  | 4.941E-12 |           |  |  |  | DCAF12L2 |         |
| V3SVHSHC_5742455  | SERBP1   |  |  | 5.018E-12 |           |  |  |  | SERBP1   |         |
| V3SVHSHC_8750042  | FYB      |  |  | 5.084E-12 |           |  |  |  | FYB      |         |
| V3SVHSHC_9488450  | AKR1C2   |  |  | 5.105E-12 |           |  |  |  | AKR1C2   |         |
| V3SVHSHC_10721000 | TOPORS   |  |  | 5.112E-12 |           |  |  |  | TOPORS   |         |
| V3SVHSHC_6995465  | ZRANB3   |  |  | 5.218E-12 |           |  |  |  | ZRANB3   |         |
| V3SVHSHC_8786012  | GSG1L    |  |  | 5.226E-12 |           |  |  |  | GSG1L    |         |
| V3SVHSHC_4817795  | USP33    |  |  | 5.308E-12 |           |  |  |  | USP33    |         |
| V3SVHSHC_5923724  | RNF181   |  |  | 5.329E-12 |           |  |  |  | RNF181   |         |
| V3SVHSHC_9509900  | CSAG1    |  |  | 5.411E-12 |           |  |  |  | CSAG1    |         |
| V3SVHSHC_5810072  | COX7A2   |  |  | 5.611E-12 |           |  |  |  | COX7A2   |         |
| V3SVHSHC_10513859 | RNF212   |  |  | 5.726E-12 |           |  |  |  | RNF212   |         |
| V3SVHSHC_4643984  | UTS2B    |  |  | 6.145E-12 |           |  |  |  | UTS2B    |         |
| V3SVHSHC_5811788  | ACOT7    |  |  | 6.182E-12 |           |  |  |  | ACOT7    |         |
| V3SVHSHC_8870459  | GTF2H4   |  |  | 6.447E-12 |           |  |  |  | GTF2H4   |         |
| V3SVHSHC_7583756  | SLC7A6   |  |  | 6.473E-12 |           |  |  |  | SLC7A6   |         |
| V3SVHSHC_6152546  | NAMPT    |  |  | 6.762E-12 |           |  |  |  | NAMPT    |         |
| V3SVHSHC_8543429  | DAXX     |  |  | 6.950E-12 |           |  |  |  | DAXX     |         |
| V3SVHSHC_10285829 | LEFTY1   |  |  | 7.003E-12 |           |  |  |  | LEFTY1   |         |
| V3SVHSHC_9828911  | ZMYND19  |  |  | 7.238E-12 |           |  |  |  | ZMYND19  |         |
| V3SVHSHC_6501422  | KCNK3    |  |  | 7.242E-12 |           |  |  |  | KCNK3    |         |
| V3SVHSHC_7721267  | MILR1    |  |  | 7.445E-12 |           |  |  |  | MILR1    |         |
| V3SVHSHC_5523170  | MSI2     |  |  | 7.886E-12 |           |  |  |  | MSI2     |         |
| V3SVHSHC_7603292  | TMEM38B  |  |  | 8.116E-12 |           |  |  |  | TMEM38B  |         |
| V3SVHSHC_6560261  | SPRY4    |  |  | 8.127E-12 |           |  |  |  | SPRY4    |         |
| V3SVHSHC_8178251  | MUM1L1   |  |  | 8.409E-12 |           |  |  |  | MUM1L1   |         |
| V3SVHSHC_5718002  | ORMDL1   |  |  | 8.775E-12 |           |  |  |  | ORMDL1   |         |
| V3SVHSHC_10231280 | OCSTAMP  |  |  | 9.024E-12 |           |  |  |  | OCSTAMP  |         |
| V3SVHSHC_4888118  | INTS9    |  |  | 9.110E-12 |           |  |  |  | INTS9    |         |
| V3SVHSHC_6581381  | DISP2    |  |  | 9.298E-12 |           |  |  |  | DISP2    |         |
| V3SVHSHC_4850597  | SLC29A3  |  |  | 9.419E-12 |           |  |  |  | SLC29A3  |         |
| V3SVHSHC_5553728  | Arglu1   |  |  | 9.594E-12 |           |  |  |  | Arglu1   |         |
| V3SVHSHC_8178350  | TES      |  |  | 9.647E-12 |           |  |  |  | TES      |         |
| V3SVHSHC_8203628  | THOC6    |  |  | 9.728E-12 |           |  |  |  | THOC6    |         |
| V3SVHSHC_8376614  | POLR2J2  |  |  | 9.930E-12 | 2.245E-26 |  |  |  | POLR2J2  | POLR2J2 |
| V3SVHSHC_5453936  | HIVEP2   |  |  | 1.020E-11 |           |  |  |  | HIVEP2   |         |

|                   |              |  |  |           |           |  |  |              |  |
|-------------------|--------------|--|--|-----------|-----------|--|--|--------------|--|
| V3SVHSHC_10833035 | WDR72        |  |  | 1.036E-11 |           |  |  | WDR72        |  |
| V3SVHSHC_10027769 | FUS          |  |  | 1.041E-11 |           |  |  | FUS          |  |
| V3SVHSHC_6769646  | SLC35G3      |  |  | 1.049E-11 |           |  |  | SLC35G3      |  |
| V3SVHSHC_7227752  | SLC23A3      |  |  | 1.057E-11 | 1.679E-01 |  |  | SLC23A3      |  |
| V3SVHSHC_6275636  | RAD54L       |  |  | 1.144E-11 |           |  |  | RAD54L       |  |
| V3SVHSHC_7836833  | TMEFF1       |  |  | 1.156E-11 |           |  |  | TMEFF1       |  |
| V3SVHSHC_9178217  | SPATA21      |  |  | 1.167E-11 |           |  |  | SPATA21      |  |
| V3SVHSHC_5006621  | MFSD6        |  |  | 1.171E-11 |           |  |  | MFSD6        |  |
| V3SVHSHC_8974739  | SGSM1        |  |  | 1.197E-11 |           |  |  | SGSM1        |  |
| V3SVHSHC_7368002  | TXNRD3       |  |  | 1.206E-11 |           |  |  | TXNRD3       |  |
| V3SVHSHC_8290385  | BBS5         |  |  | 1.235E-11 |           |  |  | BBS5         |  |
| V3SVHSHC_6054800  | C11orf87     |  |  | 1.244E-11 |           |  |  | C11orf87     |  |
| V3SVHSHC_5358269  | ABR          |  |  | 1.250E-11 |           |  |  | ABR          |  |
| V3SVHSHC_10042916 | LOC101930355 |  |  | 1.279E-11 |           |  |  | LOC101930355 |  |
| V3SVHSHC_9823499  | ARL17B       |  |  | 1.298E-11 | 3.018E-01 |  |  | ARL17B       |  |
| V3SVHSHC_5406284  | OR5AN1       |  |  | 1.317E-11 |           |  |  | OR5AN1       |  |
| V3SVHSHC_4781198  | BRISK2       |  |  | 1.319E-11 |           |  |  | BRISK2       |  |
| V3SVHSHC_9190196  | FAM25A       |  |  | 1.323E-11 | 3.280E-01 |  |  | FAM25A       |  |
| V3SVHSHC_9633419  | C1orf168     |  |  | 1.327E-11 |           |  |  | C1orf168     |  |
| V3SVHSHC_8171618  | RUSC1        |  |  | 1.372E-11 |           |  |  | RUSC1        |  |
| V3SVHSHC_7667180  | SRGAP2D      |  |  | 1.393E-11 |           |  |  | SRGAP2D      |  |
| V3SVHSHC_8186765  | CYP1A2       |  |  | 1.425E-11 |           |  |  | CYP1A2       |  |
| V3SVHSHC_9294839  | VAT1         |  |  | 1.460E-11 |           |  |  | VAT1         |  |
| V3SVHSHC_9649061  | TMSB10       |  |  | 1.460E-11 |           |  |  | TMSB10       |  |
| V3SVHSHC_10498151 | SMAD7        |  |  | 1.521E-11 |           |  |  | SMAD7        |  |
| V3SVHSHC_7986323  | DOPEY1       |  |  | 1.580E-11 |           |  |  | DOPEY1       |  |
| V3SVHSHC_8825216  | ANGPT1       |  |  | 1.598E-11 |           |  |  | ANGPT1       |  |
| V3SVHSHC_7994012  | FAM110A      |  |  | 1.604E-11 |           |  |  | FAM110A      |  |
| V3SVHSHC_10325528 | UTP6         |  |  | 1.611E-11 |           |  |  | UTP6         |  |
| V3SVHSHC_7972628  | PABPN1       |  |  | 1.612E-11 |           |  |  | PABPN1       |  |
| V3SVHSHC_9450269  | OR13C8       |  |  | 1.668E-11 |           |  |  | OR13C8       |  |
| V3SVHSHC_9030080  | MRGPRD       |  |  | 1.698E-11 |           |  |  | MRGPRD       |  |
| V3SVHSHC_9005627  | CD93         |  |  | 1.738E-11 |           |  |  | CD93         |  |
| V3SVHSHC_6651044  | PRDM7        |  |  | 1.761E-11 |           |  |  | PRDM7        |  |
| V3SVHSHC_7182443  | CEP55        |  |  | 1.799E-11 |           |  |  | CEP55        |  |
| V3SVHSHC_6495251  | FBN2         |  |  | 1.811E-11 |           |  |  | FBN2         |  |
| V3SVHSHC_10213130 | NAT2         |  |  | 1.840E-11 |           |  |  | NAT2         |  |
| V3SVHSHC_9537884  | LILRB2       |  |  | 1.846E-11 |           |  |  | LILRB2       |  |
| V3SVHSHC_5057111  | C12orf43     |  |  | 1.907E-11 |           |  |  | C12orf43     |  |
| V3SVHSHC_7126376  | ADRBK1       |  |  | 1.910E-11 |           |  |  | ADRBK1       |  |
| V3SVHSHC_10496204 | SMARCD2      |  |  | 1.912E-11 |           |  |  | SMARCD2      |  |
| V3SVHSHC_4934813  | IFNA10       |  |  | 1.913E-11 |           |  |  | IFNA10       |  |
| V3SVHSHC_10371464 | IER2         |  |  | 1.949E-11 |           |  |  | IER2         |  |
| V3SVHSHC_6358697  | C10ORF91     |  |  | 1.961E-11 |           |  |  | C10ORF91     |  |
| V3SVHSHC_9268340  | ACTC1        |  |  | 1.997E-11 |           |  |  | ACTC1        |  |
| V3SVHSHC_5295404  | SIRT7        |  |  | 2.075E-11 |           |  |  | SIRT7        |  |
| V3SVHSHC_6396482  | TCTA         |  |  | 2.169E-11 |           |  |  | TCTA         |  |
| V3SVHSHC_9878477  | CRYGB        |  |  | 2.173E-11 |           |  |  | CRYGB        |  |
| V3SVHSHC_10748654 | SRXN1        |  |  | 2.200E-11 |           |  |  | SRXN1        |  |
| V3SVHSHC_9838349  | UGT1A9       |  |  | 2.218E-11 |           |  |  | UGT1A9       |  |
| V3SVHSHC_5508551  | DAPK1        |  |  | 2.272E-11 |           |  |  | DAPK1        |  |
| V3SVHSHC_7986983  | KCTD21       |  |  | 2.356E-11 |           |  |  | KCTD21       |  |
| V3SVHSHC_5365991  | HAO2         |  |  | 2.386E-11 |           |  |  | HAO2         |  |

|                   |           |  |  |           |  |  |  |           |  |
|-------------------|-----------|--|--|-----------|--|--|--|-----------|--|
| V3SVHSHC_7353251  | LOC646730 |  |  | 2.456E-11 |  |  |  | LOC646730 |  |
| V3SVHSHC_5790767  | NDUFB3    |  |  | 2.492E-11 |  |  |  | NDUFB3    |  |
| V3SVHSHC_6337511  | TMEM38A   |  |  | 2.536E-11 |  |  |  | TMEM38A   |  |
| V3SVHSHC_7893230  | DYNLRB2   |  |  | 2.663E-11 |  |  |  | DYNLRB2   |  |
| V3SVHSHC_10822871 | KCTD5     |  |  | 2.763E-11 |  |  |  | KCTD5     |  |
| V3SVHSHC_5409221  | HVCN1     |  |  | 2.813E-11 |  |  |  | HVCN1     |  |
| V3SVHSHC_10422020 | GALNT2    |  |  | 2.827E-11 |  |  |  | GALNT2    |  |
| V3SVHSHC_6017873  | SMPD1     |  |  | 2.866E-11 |  |  |  | SMPD1     |  |
| V3SVHSHC_8971538  | NOMO1     |  |  | 2.870E-11 |  |  |  | NOMO1     |  |
| V3SVHSHC_9681467  | MAP1LC3B  |  |  | 2.888E-11 |  |  |  | MAP1LC3B  |  |
| V3SVHSHC_6661307  | KLRC1     |  |  | 2.904E-11 |  |  |  | KLRC1     |  |
| V3SVHSHC_9323384  | CSF2RB    |  |  | 2.940E-11 |  |  |  | CSF2RB    |  |
| V3SVHSHC_7511981  | PDXP      |  |  | 2.944E-11 |  |  |  | PDXP      |  |
| V3SVHSHC_6659624  | UNC13D    |  |  | 2.973E-11 |  |  |  | UNC13D    |  |
| V3SVHSHC_6643949  | NCF1      |  |  | 3.144E-11 |  |  |  | NCF1      |  |
| V3SVHSHC_4722590  | TRAPPC13  |  |  | 3.486E-11 |  |  |  | TRAPPC13  |  |
| V3SVHSHC_7777367  | ZNF808    |  |  | 3.670E-11 |  |  |  | ZNF808    |  |
| V3SVHSHC_7905605  | ATP13A2   |  |  | 3.683E-11 |  |  |  | ATP13A2   |  |
| V3SVHSHC_10456208 | TMEM100   |  |  | 3.693E-11 |  |  |  | TMEM100   |  |
| V3SVHSHC_6151853  | SLC10A5   |  |  | 3.828E-11 |  |  |  | SLC10A5   |  |
| V3SVHSHC_10461422 | PTCH1     |  |  | 3.854E-11 |  |  |  | PTCH1     |  |
| V3SVHSHC_6048167  | Srrm3     |  |  | 4.073E-11 |  |  |  | Srrm3     |  |
| V3SVHSHC_7375625  | LNP1      |  |  | 4.120E-11 |  |  |  | LNP1      |  |
| V3SVHSHC_6989261  | ZNF146    |  |  | 4.135E-11 |  |  |  | ZNF146    |  |
| V3SVHSHC_9707867  | PPIAL4C   |  |  | 4.172E-11 |  |  |  | PPIAL4C   |  |
| V3SVHSHC_9741428  | DAZ2      |  |  | 4.212E-11 |  |  |  | DAZ2      |  |
| V3SVHSHC_8368826  | CLTC      |  |  | 4.214E-11 |  |  |  | CLTC      |  |
| V3SVHSHC_7480961  | GPBP1     |  |  | 4.228E-11 |  |  |  | GPBP1     |  |
| V3SVHSHC_8658368  | SMCO2     |  |  | 4.334E-11 |  |  |  | SMCO2     |  |
| V3SVHSHC_10450829 | CCDC85A   |  |  | 4.394E-11 |  |  |  | CCDC85A   |  |
| V3SVHSHC_8340611  | PRAMEF6   |  |  | 4.428E-11 |  |  |  | PRAMEF6   |  |
| V3SVHSHC_8439314  | RNF4      |  |  | 4.525E-11 |  |  |  | RNF4      |  |
| V3SVHSHC_5160467  | C20orf196 |  |  | 4.549E-11 |  |  |  | C20orf196 |  |
| V3SVHSHC_7893296  | ERICH4    |  |  | 4.791E-11 |  |  |  | ERICH4    |  |
| V3SVHSHC_8701103  | SSX2      |  |  | 4.972E-11 |  |  |  | SSX2      |  |
| V3SVHSHC_7510760  | PPM1M     |  |  | 5.196E-11 |  |  |  | PPM1M     |  |
| V3SVHSHC_6379223  | PARL      |  |  | 5.209E-11 |  |  |  | PARL      |  |
| V3SVHSHC_6263327  | JADE2     |  |  | 5.264E-11 |  |  |  | JADE2     |  |
| V3SVHSHC_5175746  | FILIP1L   |  |  | 5.780E-11 |  |  |  | FILIP1L   |  |
| V3SVHSHC_8490233  | CERKL     |  |  | 6.105E-11 |  |  |  | CERKL     |  |
| V3SVHSHC_9984638  | KCMF1     |  |  | 6.109E-11 |  |  |  | KCMF1     |  |
| V3SVHSHC_9661172  | KRT34     |  |  | 6.366E-11 |  |  |  | KRT34     |  |
| V3SVHSHC_10834091 | HRH2      |  |  | 6.520E-11 |  |  |  | HRH2      |  |
| V3SVHSHC_4800569  | ITGB1BP2  |  |  | 6.568E-11 |  |  |  | ITGB1BP2  |  |
| V3SVHSHC_10433900 | USP25     |  |  | 6.643E-11 |  |  |  | USP25     |  |
| V3SVHSHC_7584383  | TACR2     |  |  | 6.876E-11 |  |  |  | TACR2     |  |
| V3SVHSHC_8015363  | LGALS7    |  |  | 7.144E-11 |  |  |  | LGALS7    |  |
| V3SVHSHC_5898050  | TRPV3     |  |  | 7.168E-11 |  |  |  | TRPV3     |  |
| V3SVHSHC_9836633  | CALHM1    |  |  | 7.273E-11 |  |  |  | CALHM1    |  |
| V3SVHSHC_10102778 | ITGA7     |  |  | 7.312E-11 |  |  |  | ITGA7     |  |
| V3SVHSHC_10211414 | DIDO1     |  |  | 7.396E-11 |  |  |  | DIDO1     |  |
| V3SVHSHC_5400080  | TCN1      |  |  | 7.658E-11 |  |  |  | TCN1      |  |

|                   |          |  |  |           |  |  |  |          |  |
|-------------------|----------|--|--|-----------|--|--|--|----------|--|
| V3SVHSHC_9567485  | SRGAP3   |  |  | 7.666E-11 |  |  |  | SRGAP3   |  |
| V3SVHSHC_5888084  | ZDHHC8   |  |  | 8.006E-11 |  |  |  | ZDHHC8   |  |
| V3SVHSHC_5658437  | PARD3B   |  |  | 8.131E-11 |  |  |  | PARD3B   |  |
| V3SVHSHC_9698297  | TMEM117  |  |  | 8.133E-11 |  |  |  | TMEM117  |  |
| V3SVHSHC_10358891 | ADIPOR1  |  |  | 8.398E-11 |  |  |  | ADIPOR1  |  |
| V3SVHSHC_6774728  | DDX43    |  |  | 9.082E-11 |  |  |  | DDX43    |  |
| V3SVHSHC_9891050  | SOC57    |  |  | 9.194E-11 |  |  |  | SOC57    |  |
| V3SVHSHC_6975995  | UBE3B    |  |  | 9.223E-11 |  |  |  | UBE3B    |  |
| V3SVHSHC_6358598  | ZNF593   |  |  | 9.490E-11 |  |  |  | ZNF593   |  |
| V3SVHSHC_5614580  | SPINK6   |  |  | 9.503E-11 |  |  |  | SPINK6   |  |
| V3SVHSHC_10649852 | TNFRSF6B |  |  | 9.641E-11 |  |  |  | TNFRSF6B |  |
| V3SVHSHC_7551581  | IGSF23   |  |  | 9.647E-11 |  |  |  | IGSF23   |  |
| V3SVHSHC_9083012  | NPY5R    |  |  | 1.031E-10 |  |  |  | NPY5R    |  |
| V3SVHSHC_9420173  | GRN      |  |  | 1.051E-10 |  |  |  | GRN      |  |
| V3SVHSHC_4955867  | TFB2M    |  |  | 1.087E-10 |  |  |  | TFB2M    |  |
| V3SVHSHC_9702554  | C9ORF89  |  |  | 1.101E-10 |  |  |  | C9ORF89  |  |
| V3SVHSHC_10552370 | COX5A    |  |  | 1.104E-10 |  |  |  | COX5A    |  |
| V3SVHSHC_9885407  | OSBPL7   |  |  | 1.109E-10 |  |  |  | OSBPL7   |  |
| V3SVHSHC_7596230  | C15orf54 |  |  | 1.195E-10 |  |  |  | C15orf54 |  |
| V3SVHSHC_8853200  | RPS6KA1  |  |  | 1.198E-10 |  |  |  | RPS6KA1  |  |
| V3SVHSHC_8438951  | TRIM37   |  |  | 1.203E-10 |  |  |  | TRIM37   |  |
| V3SVHSHC_8682887  | C15orf57 |  |  | 1.205E-10 |  |  |  | C15orf57 |  |
| V3SVHSHC_6696188  | CALML5   |  |  | 1.209E-10 |  |  |  | CALML5   |  |
| V3SVHSHC_9125912  | KRBA2    |  |  | 1.258E-10 |  |  |  | KRBA2    |  |
| V3SVHSHC_9020807  | VPS45    |  |  | 1.299E-10 |  |  |  | VPS45    |  |
| V3SVHSHC_9152213  | C12orf80 |  |  | 1.327E-10 |  |  |  | C12orf80 |  |
| V3SVHSHC_7089911  | DYDC1    |  |  | 1.337E-10 |  |  |  | DYDC1    |  |
| V3SVHSHC_10829207 | C1R      |  |  | 1.360E-10 |  |  |  | C1R      |  |
| V3SVHSHC_4887458  | GAL3ST2  |  |  | 1.378E-10 |  |  |  | GAL3ST2  |  |
| V3SVHSHC_5265044  | EPHA1    |  |  | 1.385E-10 |  |  |  | EPHA1    |  |
| V3SVHSHC_7434200  | CNGB1    |  |  | 1.399E-10 |  |  |  | CNGB1    |  |
| V3SVHSHC_9278900  | NXPH2    |  |  | 1.424E-10 |  |  |  | NXPH2    |  |
| V3SVHSHC_7678367  | ICT1     |  |  | 1.457E-10 |  |  |  | ICT1     |  |
| V3SVHSHC_6958307  | HSPA1B   |  |  | 1.474E-10 |  |  |  | HSPA1B   |  |
| V3SVHSHC_4893926  | RSPO3    |  |  | 1.477E-10 |  |  |  | RSPO3    |  |
| V3SVHSHC_9098324  | APOH     |  |  | 1.500E-10 |  |  |  | APOH     |  |
| V3SVHSHC_7787036  | RETNLB   |  |  | 1.521E-10 |  |  |  | RETNLB   |  |
| V3SVHSHC_6872771  | SLC25A23 |  |  | 1.555E-10 |  |  |  | SLC25A23 |  |
| V3SVHSHC_5774135  | PHKG2    |  |  | 1.616E-10 |  |  |  | PHKG2    |  |
| V3SVHSHC_10173233 | BTN3A3   |  |  | 1.690E-10 |  |  |  | BTN3A3   |  |
| V3SVHSHC_9603983  | GCM2     |  |  | 1.735E-10 |  |  |  | GCM2     |  |
| V3SVHSHC_5759153  | KLRF2    |  |  | 1.756E-10 |  |  |  | KLRF2    |  |
| V3SVHSHC_10020608 | CCDC174  |  |  | 1.865E-10 |  |  |  | CCDC174  |  |
| V3SVHSHC_8520230  | DAZ2     |  |  | 1.897E-10 |  |  |  | DAZ2     |  |
| V3SVHSHC_9672458  | MCM2     |  |  | 1.904E-10 |  |  |  | MCM2     |  |
| V3SVHSHC_8375129  | OSBPL7   |  |  | 1.909E-10 |  |  |  | OSBPL7   |  |
| V3SVHSHC_6596957  | PUSL1    |  |  | 1.915E-10 |  |  |  | PUSL1    |  |
| V3SVHSHC_10409909 | OR51B6   |  |  | 1.973E-10 |  |  |  | OR51B6   |  |
| V3SVHSHC_7990184  | GNA12    |  |  | 1.976E-10 |  |  |  | GNA12    |  |
| V3SVHSHC_5576795  | HOXC6    |  |  | 1.987E-10 |  |  |  | HOXC6    |  |
| V3SVHSHC_8307413  | ZNF324B  |  |  | 2.029E-10 |  |  |  | ZNF324B  |  |
| V3SVHSHC_8507525  | SLC25A24 |  |  | 2.035E-10 |  |  |  | SLC25A24 |  |
| V3SVHSHC_10804490 | SNTG2    |  |  | 2.051E-10 |  |  |  | SNTG2    |  |
| V3SVHSHC_7918013  | KLHL42   |  |  | 2.051E-10 |  |  |  | KLHL42   |  |

|                   |           |  |  |           |  |  |  |           |  |
|-------------------|-----------|--|--|-----------|--|--|--|-----------|--|
| V3SVHSHC_5391896  | SLC1A5    |  |  | 2.082E-10 |  |  |  | SLC1A5    |  |
| V3SVHSHC_8383247  | ZBTB37    |  |  | 2.105E-10 |  |  |  | ZBTB37    |  |
| V3SVHSHC_6344276  | CDK3      |  |  | 2.154E-10 |  |  |  | CDK3      |  |
| V3SVHSHC_5135915  | TRIM21    |  |  | 2.211E-10 |  |  |  | TRIM21    |  |
| V3SVHSHC_10344899 | PRNP      |  |  | 2.222E-10 |  |  |  | PRNP      |  |
| V3SVHSHC_5502248  | DRC1      |  |  | 2.364E-10 |  |  |  | DRC1      |  |
| V3SVHSHC_9214088  | NR5A2     |  |  | 2.438E-10 |  |  |  | NR5A2     |  |
| V3SVHSHC_8967314  | MGAT3     |  |  | 2.472E-10 |  |  |  | MGAT3     |  |
| V3SVHSHC_4695827  | LOC441239 |  |  | 2.473E-10 |  |  |  | LOC441239 |  |
| V3SVHSHC_10346813 | DPF3      |  |  | 2.508E-10 |  |  |  | DPF3      |  |
| V3SVHSHC_9632660  | SAFB2     |  |  | 2.548E-10 |  |  |  | SAFB2     |  |
| V3SVHSHC_8838746  | Msl2      |  |  | 2.574E-10 |  |  |  | Msl2      |  |
| V3SVHSHC_8518217  | LRP2BP    |  |  | 2.747E-10 |  |  |  | LRP2BP    |  |
| V3SVHSHC_6827891  | ICAM4     |  |  | 2.781E-10 |  |  |  | ICAM4     |  |
| V3SVHSHC_6851684  | SFXN2     |  |  | 2.825E-10 |  |  |  | SFXN2     |  |
| V3SVHSHC_8769578  | Zc3h18    |  |  | 2.837E-10 |  |  |  | Zc3h18    |  |
| V3SVHSHC_6200594  | Erlec1    |  |  | 2.839E-10 |  |  |  | Erlec1    |  |
| V3SVHSHC_9843728  | ARMC9     |  |  | 2.839E-10 |  |  |  | ARMC9     |  |
| V3SVHSHC_8453867  | APAF1     |  |  | 2.841E-10 |  |  |  | APAF1     |  |
| V3SVHSHC_8315366  | GLP2R     |  |  | 2.859E-10 |  |  |  | GLP2R     |  |
| V3SVHSHC_5689820  | TDP2      |  |  | 2.899E-10 |  |  |  | TDP2      |  |
| V3SVHSHC_6256760  | SCN2A     |  |  | 2.982E-10 |  |  |  | SCN2A     |  |
| V3SVHSHC_7805978  | SPINK2    |  |  | 3.041E-10 |  |  |  | SPINK2    |  |
| V3SVHSHC_10516598 | LRRC23    |  |  | 3.060E-10 |  |  |  | LRRC23    |  |
| V3SVHSHC_7387142  | TNIK      |  |  | 3.079E-10 |  |  |  | TNIK      |  |
| V3SVHSHC_4861685  | NLGN4X    |  |  | 3.183E-10 |  |  |  | NLGN4X    |  |
| V3SVHSHC_7195346  | VPS36     |  |  | 3.206E-10 |  |  |  | VPS36     |  |
| V3SVHSHC_10693907 | PNMAL1    |  |  | 3.240E-10 |  |  |  | PNMAL1    |  |
| V3SVHSHC_8972759  | SVIP      |  |  | 3.250E-10 |  |  |  | SVIP      |  |
| V3SVHSHC_7464230  | TAF7      |  |  | 3.266E-10 |  |  |  | TAF7      |  |
| V3SVHSHC_10400174 | PSD2      |  |  | 3.273E-10 |  |  |  | PSD2      |  |
| V3SVHSHC_9034832  | FLYWCH1   |  |  | 3.346E-10 |  |  |  | FLYWCH1   |  |
| V3SVHSHC_10381694 | CD2AP     |  |  | 3.365E-10 |  |  |  | CD2AP     |  |
| V3SVHSHC_5813669  | FOXK1     |  |  | 3.430E-10 |  |  |  | FOXK1     |  |
| V3SVHSHC_10373972 | KIAA1841  |  |  | 3.447E-10 |  |  |  | KIAA1841  |  |
| V3SVHSHC_6630617  | CLCN4     |  |  | 3.481E-10 |  |  |  | CLCN4     |  |
| V3SVHSHC_10845773 | DNAJA2    |  |  | 3.518E-10 |  |  |  | DNAJA2    |  |
| V3SVHSHC_6492710  | OTUB2     |  |  | 3.545E-10 |  |  |  | OTUB2     |  |
| V3SVHSHC_7228709  | C2cd2     |  |  | 3.556E-10 |  |  |  | C2cd2     |  |
| V3SVHSHC_10432250 | TXNDC11   |  |  | 3.680E-10 |  |  |  | TXNDC11   |  |
| V3SVHSHC_8472974  | ASB17     |  |  | 3.856E-10 |  |  |  | ASB17     |  |
| V3SVHSHC_9297512  | Ddrgk1    |  |  | 3.876E-10 |  |  |  | Ddrgk1    |  |
| V3SVHSHC_10844420 | LRRC38    |  |  | 3.915E-10 |  |  |  | LRRC38    |  |
| V3SVHSHC_5303159  | UPF3A     |  |  | 3.994E-10 |  |  |  | UPF3A     |  |
| V3SVHSHC_8881448  | SMARCA5   |  |  | 4.038E-10 |  |  |  | SMARCA5   |  |
| V3SVHSHC_6731102  | MAGEA9    |  |  | 4.050E-10 |  |  |  | MAGEA9    |  |
| V3SVHSHC_5615372  | TIAF1     |  |  | 4.083E-10 |  |  |  | TIAF1     |  |
| V3SVHSHC_10685558 | CRB1      |  |  | 4.138E-10 |  |  |  | CRB1      |  |
| V3SVHSHC_5194919  | CD4       |  |  | 4.231E-10 |  |  |  | CD4       |  |
| V3SVHSHC_6176174  | PTTG2     |  |  | 4.286E-10 |  |  |  | PTTG2     |  |
| V3SVHSHC_5397176  | TAOK2     |  |  | 4.333E-10 |  |  |  | TAOK2     |  |
| V3SVHSHC_7299296  | AIMP2     |  |  | 4.375E-10 |  |  |  | AIMP2     |  |
| V3SVHSHC_6209735  | KIAA0754  |  |  | 4.395E-10 |  |  |  | KIAA0754  |  |
| V3SVHSHC_6774332  | HEATR4    |  |  | 4.465E-10 |  |  |  | HEATR4    |  |

|                   |              |  |  |           |           |  |  |              |       |
|-------------------|--------------|--|--|-----------|-----------|--|--|--------------|-------|
| V3SVHSHC_7027772  | KIF28P       |  |  | 4.622E-10 |           |  |  | KIF28P       |       |
| V3SVHSHC_10748357 | DNAJA1       |  |  | 5.086E-10 |           |  |  | DNAJA1       |       |
| V3SVHSHC_5322497  | GBP2         |  |  | 5.338E-10 |           |  |  | GBP2         |       |
| V3SVHSHC_6963224  | ZNF668       |  |  | 5.444E-10 |           |  |  | ZNF668       |       |
| V3SVHSHC_8051630  | CDKN3        |  |  | 5.887E-10 |           |  |  | CDKN3        |       |
| V3SVHSHC_5185217  | ADAMTSL2     |  |  | 5.904E-10 |           |  |  | ADAMTSL2     |       |
| V3SVHSHC_5876633  | SYCP2        |  |  | 5.943E-10 |           |  |  | SYCP2        |       |
| V3SVHSHC_6270422  | SLC27A6      |  |  | 5.971E-10 |           |  |  | SLC27A6      |       |
| V3SVHSHC_7456409  | GDE1         |  |  | 5.971E-10 |           |  |  | GDE1         |       |
| V3SVHSHC_7145516  | CPNE5        |  |  | 5.995E-10 |           |  |  | CPNE5        |       |
| V3SVHSHC_7420439  | SEMA7A       |  |  | 6.012E-10 |           |  |  | SEMA7A       |       |
| V3SVHSHC_6198647  | SUN1         |  |  | 6.226E-10 |           |  |  | SUN1         |       |
| V3SVHSHC_9586130  | CD302        |  |  | 6.268E-10 |           |  |  | CD302        |       |
| V3SVHSHC_8485448  | TMEM183A     |  |  | 6.296E-10 |           |  |  | TMEM183A     |       |
| V3SVHSHC_10267679 | Rrp7a        |  |  | 6.367E-10 |           |  |  | Rrp7a        |       |
| V3SVHSHC_10480298 | SEMG2        |  |  | 6.710E-10 |           |  |  | SEMG2        |       |
| V3SVHSHC_6562505  | FOXF2        |  |  | 6.853E-10 |           |  |  | FOXF2        |       |
| V3SVHSHC_6842213  | PDZD3        |  |  | 7.207E-10 | 6.411E-06 |  |  | PDZD3        | PDZD3 |
| V3SVHSHC_9992261  | GSDMA        |  |  | 7.360E-10 |           |  |  | GSDMA        |       |
| V3SVHSHC_8631803  | BTNL10       |  |  | 7.369E-10 |           |  |  | BTNL10       |       |
| V3SVHSHC_6639791  | ING1         |  |  | 7.370E-10 |           |  |  | ING1         |       |
| V3SVHSHC_8468519  | TSPAN31      |  |  | 7.385E-10 |           |  |  | TSPAN31      |       |
| V3SVHSHC_10404629 | KPNA6        |  |  | 7.828E-10 |           |  |  | KPNA6        |       |
| V3SVHSHC_5219075  | CHST10       |  |  | 8.006E-10 |           |  |  | CHST10       |       |
| V3SVHSHC_8220326  | SLMAP        |  |  | 8.320E-10 |           |  |  | SLMAP        |       |
| V3SVHSHC_4686290  | DNAJC22      |  |  | 8.768E-10 |           |  |  | DNAJC22      |       |
| V3SVHSHC_7823105  | ZIK1         |  |  | 8.871E-10 |           |  |  | ZIK1         |       |
| V3SVHSHC_8028695  | ZNF34        |  |  | 9.639E-10 |           |  |  | ZNF34        |       |
| V3SVHSHC_8888081  | CIART        |  |  | 1.072E-09 |           |  |  | CIART        |       |
| V3SVHSHC_6670448  | LOC285500    |  |  | 1.083E-09 |           |  |  | LOC285500    |       |
| V3SVHSHC_7966589  | CXCR4        |  |  | 1.275E-09 |           |  |  | CXCR4        |       |
| V3SVHSHC_5625470  | ROR1         |  |  | 1.284E-09 |           |  |  | ROR1         |       |
| V3SVHSHC_8473535  | POMZP3       |  |  | 1.318E-09 |           |  |  | POMZP3       |       |
| V3SVHSHC_5250689  | MRGPRX1      |  |  | 1.361E-09 |           |  |  | MRGPRX1      |       |
| V3SVHSHC_6486902  | MFAP5        |  |  | 1.366E-09 |           |  |  | MFAP5        |       |
| V3SVHSHC_6844490  | HOXC5        |  |  | 1.369E-09 |           |  |  | HOXC5        |       |
| V3SVHSHC_10487855 | SYNGAP1      |  |  | 1.375E-09 |           |  |  | SYNGAP1      |       |
| V3SVHSHC_5422058  | EIF2AK2      |  |  | 1.384E-09 |           |  |  | EIF2AK2      |       |
| V3SVHSHC_4782749  | KIAA1045     |  |  | 1.423E-09 |           |  |  | KIAA1045     |       |
| V3SVHSHC_6467498  | PRMT8        |  |  | 1.439E-09 |           |  |  | PRMT8        |       |
| V3SVHSHC_9988895  | ZNF600       |  |  | 1.475E-09 |           |  |  | ZNF600       |       |
| V3SVHSHC_7309922  | TSSC4        |  |  | 1.506E-09 |           |  |  | TSSC4        |       |
| V3SVHSHC_5529242  | UQCC1        |  |  | 1.528E-09 |           |  |  | UQCC1        |       |
| V3SVHSHC_6379685  | SLITRK4      |  |  | 1.542E-09 |           |  |  | SLITRK4      |       |
| V3SVHSHC_5405261  | LOC100129361 |  |  | 1.752E-09 |           |  |  | LOC100129361 |       |
| V3SVHSHC_8774099  | TAS2R10      |  |  | 1.762E-09 |           |  |  | TAS2R10      |       |
| V3SVHSHC_8174357  | SEMA3G       |  |  | 1.767E-09 |           |  |  | SEMA3G       |       |
| V3SVHSHC_7838582  | OXSRI        |  |  | 1.770E-09 |           |  |  | OXSRI        |       |
| V3SVHSHC_10481750 | ZXDB         |  |  | 1.850E-09 |           |  |  | ZXDB         |       |
| V3SVHSHC_9877091  | FAM98A       |  |  | 1.947E-09 |           |  |  | FAM98A       |       |
| V3SVHSHC_4763213  | YKT6         |  |  | 2.001E-09 |           |  |  | YKT6         |       |

|                   |              |  |  |           |           |  |  |  |              |       |
|-------------------|--------------|--|--|-----------|-----------|--|--|--|--------------|-------|
| V3SVHSHC_8762978  | LRRC24       |  |  | 2.132E-09 |           |  |  |  | LRRC24       |       |
| V3SVHSHC_10152278 | ISX          |  |  | 2.271E-09 |           |  |  |  | ISX          |       |
| V3SVHSHC_7969922  | CT45A2       |  |  | 2.299E-09 |           |  |  |  | CT45A2       |       |
| V3SVHSHC_6075458  | METTL4       |  |  | 2.304E-09 |           |  |  |  | METTL4       |       |
| V3SVHSHC_7472216  | PLS1         |  |  | 2.307E-09 |           |  |  |  | PLS1         |       |
| V3SVHSHC_9862538  | CDY2A        |  |  | 2.382E-09 |           |  |  |  | CDY2A        |       |
| V3SVHSHC_10824257 | TRPM7        |  |  | 2.415E-09 |           |  |  |  | TRPM7        |       |
| V3SVHSHC_10776209 | LOC101929627 |  |  | 2.509E-09 |           |  |  |  | LOC101929627 |       |
| V3SVHSHC_7384568  | ITGA4        |  |  | 2.605E-09 |           |  |  |  | ITGA4        |       |
| V3SVHSHC_4692989  | DYNC2H1      |  |  | 2.622E-09 |           |  |  |  | DYNC2H1      |       |
| V3SVHSHC_7016849  | SLC30A1      |  |  | 2.627E-09 |           |  |  |  | SLC30A1      |       |
| V3SVHSHC_6545939  | ASB18        |  |  | 2.630E-09 |           |  |  |  | ASB18        |       |
| V3SVHSHC_4906433  | TJP1         |  |  | 2.714E-09 |           |  |  |  | TJP1         |       |
| V3SVHSHC_6869603  | SLCO1B7      |  |  | 2.802E-09 |           |  |  |  | SLCO1B7      |       |
| V3SVHSHC_5923658  | ZNF519       |  |  | 2.942E-09 |           |  |  |  | ZNF519       |       |
| V3SVHSHC_9572039  | C1QTNF5      |  |  | 3.030E-09 |           |  |  |  | C1QTNF5      |       |
| V3SVHSHC_9426047  | TMEM54       |  |  | 3.288E-09 |           |  |  |  | TMEM54       |       |
| V3SVHSHC_6028301  | LOC101929587 |  |  | 3.297E-09 |           |  |  |  | LOC101929587 |       |
| V3SVHSHC_9587516  | RRH          |  |  | 3.677E-09 |           |  |  |  | RRH          |       |
| V3SVHSHC_5622071  | TTC32        |  |  | 3.688E-09 |           |  |  |  | TTC32        |       |
| V3SVHSHC_9733838  | TC2N         |  |  | 3.882E-09 |           |  |  |  | TC2N         |       |
| V3SVHSHC_4921976  | LOC101929571 |  |  | 3.901E-09 |           |  |  |  | LOC101929571 |       |
| V3SVHSHC_10109114 | ACTA1        |  |  | 3.952E-09 |           |  |  |  | ACTA1        |       |
| V3SVHSHC_7079252  | WASF3        |  |  | 4.053E-09 |           |  |  |  | WASF3        |       |
| V3SVHSHC_4642796  | ACTR6        |  |  | 4.188E-09 |           |  |  |  | ACTR6        |       |
| V3SVHSHC_8933192  | CXorf58      |  |  | 4.206E-09 |           |  |  |  | CXorf58      |       |
| V3SVHSHC_9500231  | DTWD1        |  |  | 4.293E-09 |           |  |  |  | DTWD1        |       |
| V3SVHSHC_7643816  | SGK2         |  |  | 4.467E-09 |           |  |  |  | SGK2         |       |
| V3SVHSHC_8596427  | NANS         |  |  | 4.496E-09 |           |  |  |  | NANS         |       |
| V3SVHSHC_5069981  | LPHN3        |  |  | 4.624E-09 |           |  |  |  | LPHN3        |       |
| V3SVHSHC_9914018  | PLVAP        |  |  | 4.843E-09 |           |  |  |  | PLVAP        |       |
| V3SVHSHC_9437102  | CLEC4M       |  |  | 4.988E-09 |           |  |  |  | CLEC4M       |       |
| V3SVHSHC_4708532  | RBL1         |  |  | 5.012E-09 |           |  |  |  | RBL1         |       |
| V3SVHSHC_5813042  | ZNF37A       |  |  | 5.209E-09 |           |  |  |  | ZNF37A       |       |
| V3SVHSHC_8445155  | CIART        |  |  | 5.259E-09 | 9.598E-14 |  |  |  | CIART        | CIART |
| V3SVHSHC_9256922  | KCNMB3       |  |  | 5.551E-09 |           |  |  |  | KCNMB3       |       |
| V3SVHSHC_6561416  | DCLRE1B      |  |  | 5.563E-09 |           |  |  |  | DCLRE1B      |       |
| V3SVHSHC_9392717  | GJA8         |  |  | 5.575E-09 |           |  |  |  | GJA8         |       |
| V3SVHSHC_5458028  | CALHM3       |  |  | 5.821E-09 |           |  |  |  | CALHM3       |       |
| V3SVHSHC_7844159  | IL2RA        |  |  | 5.862E-09 |           |  |  |  | IL2RA        |       |
| V3SVHSHC_9764363  | LRRC27       |  |  | 6.088E-09 |           |  |  |  | LRRC27       |       |
| V3SVHSHC_8226662  | ZCRB1        |  |  | 6.159E-09 |           |  |  |  | ZCRB1        |       |
| V3SVHSHC_5035397  | ULK3         |  |  | 6.214E-09 |           |  |  |  | ULK3         |       |
| V3SVHSHC_6962003  | ISY1         |  |  | 6.264E-09 |           |  |  |  | ISY1         |       |
| V3SVHSHC_9960680  | SCNN1D       |  |  | 6.495E-09 |           |  |  |  | SCNN1D       |       |
| V3SVHSHC_6477398  | GPRASP1      |  |  | 6.566E-09 |           |  |  |  | GPRASP1      |       |
| V3SVHSHC_7918838  | PYROXD2      |  |  | 6.759E-09 |           |  |  |  | PYROXD2      |       |
| V3SVHSHC_9713972  | OR5AN1       |  |  | 7.033E-09 |           |  |  |  | OR5AN1       |       |
| V3SVHSHC_9824357  | PCBP2        |  |  | 7.216E-09 |           |  |  |  | PCBP2        |       |
| V3SVHSHC_7384403  | DUSP26       |  |  | 7.348E-09 |           |  |  |  | DUSP26       |       |
| V3SVHSHC_8244911  | AMY1C        |  |  | 7.508E-09 |           |  |  |  | AMY1C        |       |
| V3SVHSHC_5573198  | CTBS         |  |  | 7.606E-09 |           |  |  |  | CTBS         |       |



|                   |          |  |  |           |           |  |  |  |          |  |
|-------------------|----------|--|--|-----------|-----------|--|--|--|----------|--|
| V3SVHSHC_9620813  | MAK      |  |  | 8.353E-09 |           |  |  |  | MAK      |  |
| V3SVHSHC_7029422  | NOL9     |  |  | 8.446E-09 |           |  |  |  | NOL9     |  |
| V3SVHSHC_9799442  | MLLT6    |  |  | 8.699E-09 |           |  |  |  | MLLT6    |  |
| V3SVHSHC_8258870  | POLN     |  |  | 8.919E-09 |           |  |  |  | POLN     |  |
| V3SVHSHC_4712459  | MRPL4    |  |  | 8.977E-09 |           |  |  |  | MRPL4    |  |
| V3SVHSHC_5561912  | NDUFAF3  |  |  | 9.040E-09 |           |  |  |  | NDUFAF3  |  |
| V3SVHSHC_4932173  | KIAA1429 |  |  | 9.229E-09 |           |  |  |  | KIAA1429 |  |
| V3SVHSHC_10832045 | SAPCD2   |  |  | 9.514E-09 |           |  |  |  | SAPCD2   |  |
| V3SVHSHC_5922239  | IFNL4    |  |  | 9.932E-09 |           |  |  |  | IFNL4    |  |
| V3SVHSHC_6681965  | SAMD12   |  |  | 1.023E-08 | 4.972E-01 |  |  |  | SAMD12   |  |
| V3SVHSHC_5880164  | HES5     |  |  | 1.062E-08 |           |  |  |  | HES5     |  |
| V3SVHSHC_10318499 | PRR22    |  |  | 1.071E-08 |           |  |  |  | PRR22    |  |
| V3SVHSHC_10351334 | PPP6R1   |  |  | 1.089E-08 |           |  |  |  | PPP6R1   |  |
| V3SVHSHC_10667771 | PRKX     |  |  | 1.091E-08 |           |  |  |  | PRKX     |  |
| V3SVHSHC_9087566  | TRIM56   |  |  | 1.107E-08 |           |  |  |  | TRIM56   |  |
| V3SVHSHC_8571875  | C19ORF26 |  |  | 1.153E-08 |           |  |  |  | C19ORF26 |  |
| V3SVHSHC_10222436 | OR8G2    |  |  | 1.202E-08 |           |  |  |  | OR8G2    |  |
| V3SVHSHC_6525644  | MET      |  |  | 1.234E-08 |           |  |  |  | MET      |  |
| V3SVHSHC_4703318  | TMEM216  |  |  | 1.265E-08 |           |  |  |  | TMEM216  |  |
| V3SVHSHC_9137792  | OTUD6B   |  |  | 1.276E-08 |           |  |  |  | OTUD6B   |  |
| V3SVHSHC_9323483  | ERLIN2   |  |  | 1.279E-08 |           |  |  |  | ERLIN2   |  |
| V3SVHSHC_8906627  | OR4C16   |  |  | 1.332E-08 |           |  |  |  | OR4C16   |  |
| V3SVHSHC_8949296  | NDUFS3   |  |  | 1.387E-08 |           |  |  |  | NDUFS3   |  |
| V3SVHSHC_7376384  | OR2Z1    |  |  | 1.394E-08 |           |  |  |  | OR2Z1    |  |
| V3SVHSHC_5612798  | PDCL2    |  |  | 1.443E-08 |           |  |  |  | PDCL2    |  |
| V3SVHSHC_5628605  | AAR2     |  |  | 1.447E-08 |           |  |  |  | AAR2     |  |
| V3SVHSHC_9561215  | LDB2     |  |  | 1.490E-08 |           |  |  |  | LDB2     |  |
| V3SVHSHC_8898245  | AFF3     |  |  | 1.498E-08 |           |  |  |  | AFF3     |  |
| V3SVHSHC_7500068  | PIK3R5   |  |  | 1.511E-08 |           |  |  |  | PIK3R5   |  |
| V3SVHSHC_6162248  | MIPEP    |  |  | 1.562E-08 |           |  |  |  | MIPEP    |  |
| V3SVHSHC_8647610  | RRP36    |  |  | 1.575E-08 |           |  |  |  | RRP36    |  |
| V3SVHSHC_5942567  | BEST1    |  |  | 1.771E-08 |           |  |  |  | BEST1    |  |
| V3SVHSHC_10382651 | NXT2     |  |  | 1.871E-08 | 2.249E-01 |  |  |  | NXT2     |  |
| V3SVHSHC_6262601  | CRK      |  |  | 1.884E-08 |           |  |  |  | CRK      |  |
| V3SVHSHC_6865478  | GRXCR1   |  |  | 1.894E-08 |           |  |  |  | GRXCR1   |  |
| V3SVHSHC_6593822  | ZKSCAN2  |  |  | 1.898E-08 |           |  |  |  | ZKSCAN2  |  |
| V3SVHSHC_7785254  | SMR3B    |  |  | 2.042E-08 |           |  |  |  | SMR3B    |  |
| V3SVHSHC_7759712  | ALKBH6   |  |  | 2.045E-08 |           |  |  |  | ALKBH6   |  |
| V3SVHSHC_8353052  | GAS2L1   |  |  | 2.066E-08 |           |  |  |  | GAS2L1   |  |
| V3SVHSHC_7367705  | FANCL    |  |  | 2.229E-08 |           |  |  |  | FANCL    |  |
| V3SVHSHC_5899205  | CT47B1   |  |  | 2.256E-08 |           |  |  |  | CT47B1   |  |
| V3SVHSHC_6412256  | DCHS1    |  |  | 2.305E-08 |           |  |  |  | DCHS1    |  |
| V3SVHSHC_6637844  | ZNF485   |  |  | 2.311E-08 |           |  |  |  | ZNF485   |  |
| V3SVHSHC_6558347  | C3AR1    |  |  | 2.340E-08 |           |  |  |  | C3AR1    |  |
| V3SVHSHC_6430835  | UNC5D    |  |  | 2.343E-08 |           |  |  |  | UNC5D    |  |
| V3SVHSHC_8188514  | Carkd    |  |  | 2.476E-08 |           |  |  |  | Carkd    |  |
| V3SVHSHC_10301174 | CLEC4E   |  |  | 2.493E-08 |           |  |  |  | CLEC4E   |  |
| V3SVHSHC_7223561  | CORO1B   |  |  | 2.513E-08 |           |  |  |  | CORO1B   |  |
| V3SVHSHC_8846501  | FCGR3A   |  |  | 2.523E-08 |           |  |  |  | FCGR3A   |  |
| V3SVHSHC_6578609  | UPF2     |  |  | 2.558E-08 |           |  |  |  | UPF2     |  |
| V3SVHSHC_10815974 | LMAN2L   |  |  | 2.627E-08 |           |  |  |  | LMAN2L   |  |
| V3SVHSHC_6188153  | GRXCR2   |  |  | 2.727E-08 |           |  |  |  | GRXCR2   |  |
| V3SVHSHC_6405986  | SLC35D1  |  |  | 2.782E-08 |           |  |  |  | SLC35D1  |  |
| V3SVHSHC_9567716  | ZNF300   |  |  | 2.794E-08 |           |  |  |  | ZNF300   |  |

|                   |              |  |  |           |           |  |  |  |              |        |
|-------------------|--------------|--|--|-----------|-----------|--|--|--|--------------|--------|
| V3SVHSHC_5575277  | SMIM3        |  |  | 2.837E-08 |           |  |  |  | SMIM3        |        |
| V3SVHSHC_6635435  | RPL9         |  |  | 2.844E-08 |           |  |  |  | RPL9         |        |
| V3SVHSHC_7028399  | AKAP13       |  |  | 2.901E-08 |           |  |  |  | AKAP13       |        |
| V3SVHSHC_5432321  | CNIH1        |  |  | 3.015E-08 |           |  |  |  | CNIH1        |        |
| V3SVHSHC_5354078  | BOLA1        |  |  | 3.037E-08 |           |  |  |  | BOLA1        |        |
| V3SVHSHC_7995299  | ORAI1        |  |  | 3.114E-08 |           |  |  |  | ORAI1        |        |
| V3SVHSHC_8242073  | OTUD5        |  |  | 3.135E-08 | 3.589E-01 |  |  |  | OTUD5        |        |
| V3SVHSHC_8618339  | FAM76B       |  |  | 3.237E-08 |           |  |  |  | FAM76B       |        |
| V3SVHSHC_7215608  | HIF3A        |  |  | 3.242E-08 |           |  |  |  | HIF3A        |        |
| V3SVHSHC_9111590  | CLCNKB       |  |  | 3.400E-08 | 1.469E-11 |  |  |  | CLCNKB       | CLCNKB |
| V3SVHSHC_5280125  | GPATCH11     |  |  | 3.449E-08 |           |  |  |  | GPATCH11     |        |
| V3SVHSHC_8651570  | LOC100507462 |  |  | 3.457E-08 |           |  |  |  | LOC100507462 |        |
| V3SVHSHC_6467102  | LOC101928548 |  |  | 3.580E-08 |           |  |  |  | LOC101928548 |        |
| V3SVHSHC_4761629  | PGAM5        |  |  | 3.593E-08 |           |  |  |  | PGAM5        |        |
| V3SVHSHC_8445485  | Ccdc138      |  |  | 3.597E-08 |           |  |  |  | Ccdc138      |        |
| V3SVHSHC_8562635  | CHST8        |  |  | 3.741E-08 |           |  |  |  | CHST8        |        |
| V3SVHSHC_7566992  | PRDX4        |  |  | 3.844E-08 |           |  |  |  | PRDX4        |        |
| V3SVHSHC_9677078  | SAMD11       |  |  | 3.884E-08 |           |  |  |  | SAMD11       |        |
| V3SVHSHC_7044305  | MTRNR2L6     |  |  | 3.991E-08 |           |  |  |  | MTRNR2L6     |        |
| V3SVHSHC_5981837  | DDX26B       |  |  | 4.037E-08 |           |  |  |  | DDX26B       |        |
| V3SVHSHC_7066712  | USP14        |  |  | 4.326E-08 |           |  |  |  | USP14        |        |
| V3SVHSHC_8346419  | ZNF557       |  |  | 4.374E-08 |           |  |  |  | ZNF557       |        |
| V3SVHSHC_7768556  | C17orf75     |  |  | 4.528E-08 |           |  |  |  | C17orf75     |        |
| V3SVHSHC_8423144  | RPTOR        |  |  | 4.811E-08 |           |  |  |  | RPTOR        |        |
| V3SVHSHC_8116343  | KLHL28       |  |  | 4.823E-08 |           |  |  |  | KLHL28       |        |
| V3SVHSHC_8214914  | Celf4        |  |  | 4.930E-08 |           |  |  |  | Celf4        |        |
| V3SVHSHC_7572800  | ZNF200       |  |  | 5.708E-08 |           |  |  |  | ZNF200       |        |
| V3SVHSHC_9167195  | NTF4         |  |  | 5.732E-08 |           |  |  |  | NTF4         |        |
| V3SVHSHC_8279264  | KDM8         |  |  | 6.241E-08 |           |  |  |  | KDM8         |        |
| V3SVHSHC_5258840  | BTG2         |  |  | 6.375E-08 |           |  |  |  | BTG2         |        |
| V3SVHSHC_10538246 | LAMP2        |  |  | 6.445E-08 |           |  |  |  | LAMP2        |        |
| V3SVHSHC_5214224  | ARPC1B       |  |  | 6.454E-08 |           |  |  |  | ARPC1B       |        |
| V3SVHSHC_8250323  | TTL5         |  |  | 7.044E-08 |           |  |  |  | TTL5         |        |
| V3SVHSHC_4988570  | STAT5A       |  |  | 7.156E-08 |           |  |  |  | STAT5A       |        |
| V3SVHSHC_9658070  | NANOG        |  |  | 7.213E-08 |           |  |  |  | NANOG        |        |
| V3SVHSHC_4863302  | PHYHIP       |  |  | 7.289E-08 | 1.795E-14 |  |  |  | PHYHIP       | PHYHIP |
| V3SVHSHC_9508448  | SCD5         |  |  | 7.538E-08 |           |  |  |  | SCD5         |        |
| V3SVHSHC_7549964  | CSN2         |  |  | 7.642E-08 |           |  |  |  | CSN2         |        |
| V3SVHSHC_5013914  | HBD          |  |  | 8.280E-08 |           |  |  |  | HBD          |        |
| V3SVHSHC_6008402  | TTR          |  |  | 8.378E-08 |           |  |  |  | TTR          |        |
| V3SVHSHC_5994179  | CHRNA6       |  |  | 8.387E-08 |           |  |  |  | CHRNA6       |        |
| V3SVHSHC_9062486  | ADHFE1       |  |  | 8.554E-08 |           |  |  |  | ADHFE1       |        |
| V3SVHSHC_10001105 | EIF4E3       |  |  | 8.563E-08 |           |  |  |  | EIF4E3       |        |
| V3SVHSHC_8795054  | TUSC3        |  |  | 8.596E-08 |           |  |  |  | TUSC3        |        |
| V3SVHSHC_7750835  | ZSCAN9       |  |  | 8.653E-08 |           |  |  |  | ZSCAN9       |        |
| V3SVHSHC_6424796  | SLC22A6      |  |  | 8.799E-08 |           |  |  |  | SLC22A6      |        |
| V3SVHSHC_4643786  | GLT1D1       |  |  | 8.918E-08 |           |  |  |  | GLT1D1       |        |
| V3SVHSHC_5749352  | SAR1B        |  |  | 9.325E-08 |           |  |  |  | SAR1B        |        |
| V3SVHSHC_6152414  | TCEAL6       |  |  | 9.372E-08 |           |  |  |  | TCEAL6       |        |
| V3SVHSHC_6098063  | ALOX5AP      |  |  | 9.688E-08 |           |  |  |  | ALOX5AP      |        |
| V3SVHSHC_9383444  | ANKRD35      |  |  | 1.012E-07 |           |  |  |  | ANKRD35      |        |

|                   |              |  |  |           |  |  |  |              |  |
|-------------------|--------------|--|--|-----------|--|--|--|--------------|--|
| V3SVHSHC_9362852  | DRD5         |  |  | 1.014E-07 |  |  |  | DRD5         |  |
| V3SVHSHC_7505183  | ZNF716       |  |  | 1.045E-07 |  |  |  | ZNF716       |  |
| V3SVHSHC_10564844 | SLC28A1      |  |  | 1.064E-07 |  |  |  | SLC28A1      |  |
| V3SVHSHC_7576364  | ZRANB3       |  |  | 1.114E-07 |  |  |  | ZRANB3       |  |
| V3SVHSHC_5009162  | ATP5S        |  |  | 1.132E-07 |  |  |  | ATP5S        |  |
| V3SVHSHC_8787464  | EPO          |  |  | 1.171E-07 |  |  |  | EPO          |  |
| V3SVHSHC_7522541  | LRRC23       |  |  | 1.172E-07 |  |  |  | LRRC23       |  |
| V3SVHSHC_9061562  | NLRP11       |  |  | 1.251E-07 |  |  |  | NLRP11       |  |
| V3SVHSHC_10309490 | OR51M1       |  |  | 1.265E-07 |  |  |  | OR51M1       |  |
| V3SVHSHC_5656919  | KLRC4-KLRK1  |  |  | 1.377E-07 |  |  |  | KLRC4-KLRK1  |  |
| V3SVHSHC_9992393  | CTPS2        |  |  | 1.490E-07 |  |  |  | CTPS2        |  |
| V3SVHSHC_4946924  | RPA4         |  |  | 1.539E-07 |  |  |  | RPA4         |  |
| V3SVHSHC_10610615 | PTGDS        |  |  | 1.560E-07 |  |  |  | PTGDS        |  |
| V3SVHSHC_7916264  | TGM7         |  |  | 1.584E-07 |  |  |  | TGM7         |  |
| V3SVHSHC_7529141  | CYP1B1       |  |  | 1.604E-07 |  |  |  | CYP1B1       |  |
| V3SVHSHC_4724405  | FAM133A      |  |  | 1.613E-07 |  |  |  | FAM133A      |  |
| V3SVHSHC_5822942  | CATSPERG     |  |  | 1.624E-07 |  |  |  | CATSPERG     |  |
| V3SVHSHC_7534388  | INTS3        |  |  | 1.627E-07 |  |  |  | INTS3        |  |
| V3SVHSHC_5568875  | USH1C        |  |  | 1.692E-07 |  |  |  | USH1C        |  |
| V3SVHSHC_7564616  | THBS3        |  |  | 1.749E-07 |  |  |  | THBS3        |  |
| V3SVHSHC_6360941  | BAIAP3       |  |  | 1.783E-07 |  |  |  | BAIAP3       |  |
| V3SVHSHC_9905438  | MFSD2B       |  |  | 1.799E-07 |  |  |  | MFSD2B       |  |
| V3SVHSHC_7846931  | MORC2        |  |  | 1.820E-07 |  |  |  | MORC2        |  |
| V3SVHSHC_9004142  | STRA13       |  |  | 1.829E-07 |  |  |  | STRA13       |  |
| V3SVHSHC_5730212  | RIC3         |  |  | 1.877E-07 |  |  |  | RIC3         |  |
| V3SVHSHC_9896627  | NDUFA7       |  |  | 1.912E-07 |  |  |  | NDUFA7       |  |
| V3SVHSHC_8139311  | CTAGE9       |  |  | 1.946E-07 |  |  |  | CTAGE9       |  |
| V3SVHSHC_7528547  | TM2D1        |  |  | 1.960E-07 |  |  |  | TM2D1        |  |
| V3SVHSHC_6529010  | FUOM         |  |  | 1.973E-07 |  |  |  | FUOM         |  |
| V3SVHSHC_8011106  | LOC441155    |  |  | 2.157E-07 |  |  |  | LOC441155    |  |
| V3SVHSHC_10229432 | THAP2        |  |  | 2.217E-07 |  |  |  | THAP2        |  |
| V3SVHSHC_5208020  | TEF          |  |  | 2.239E-07 |  |  |  | TEF          |  |
| V3SVHSHC_10732187 | ANGEL2       |  |  | 2.258E-07 |  |  |  | ANGEL2       |  |
| V3SVHSHC_9395588  | FAM110C      |  |  | 2.269E-07 |  |  |  | FAM110C      |  |
| V3SVHSHC_8367968  | REPS2        |  |  | 2.289E-07 |  |  |  | REPS2        |  |
| V3SVHSHC_10261805 | OR13G1       |  |  | 2.348E-07 |  |  |  | OR13G1       |  |
| V3SVHSHC_8411924  | Mfsd10       |  |  | 2.350E-07 |  |  |  | Mfsd10       |  |
| V3SVHSHC_8384435  | TNKS2        |  |  | 2.397E-07 |  |  |  | TNKS2        |  |
| V3SVHSHC_7287515  | ABR          |  |  | 2.498E-07 |  |  |  | ABR          |  |
| V3SVHSHC_9197621  | TMC1         |  |  | 2.586E-07 |  |  |  | TMC1         |  |
| V3SVHSHC_6021140  | P2RX7        |  |  | 2.610E-07 |  |  |  | P2RX7        |  |
| V3SVHSHC_10582268 | LSMEM2       |  |  | 2.628E-07 |  |  |  | LSMEM2       |  |
| V3SVHSHC_7693712  | ACE2         |  |  | 2.629E-07 |  |  |  | ACE2         |  |
| V3SVHSHC_7807067  | LOC101929983 |  |  | 2.731E-07 |  |  |  | LOC101929983 |  |
| V3SVHSHC_7710080  | OR4E2        |  |  | 2.740E-07 |  |  |  | OR4E2        |  |
| V3SVHSHC_8287448  | FRMD3        |  |  | 2.775E-07 |  |  |  | FRMD3        |  |
| V3SVHSHC_5676389  | DSCAM        |  |  | 2.966E-07 |  |  |  | DSCAM        |  |
| V3SVHSHC_10717865 | PRDM15       |  |  | 2.975E-07 |  |  |  | PRDM15       |  |
| V3SVHSHC_7907618  | VRTN         |  |  | 2.976E-07 |  |  |  | VRTN         |  |
| V3SVHSHC_9696152  | BCL9L        |  |  | 3.097E-07 |  |  |  | BCL9L        |  |
| V3SVHSHC_6464330  | AHSG         |  |  | 3.101E-07 |  |  |  | AHSG         |  |

|                   |              |  |  |           |  |  |  |                  |  |
|-------------------|--------------|--|--|-----------|--|--|--|------------------|--|
| V3SVHSHC_9836534  | ATP2C2       |  |  | 3.299E-07 |  |  |  | ATP2C2           |  |
| V3SVHSHC_6739715  | DOCK1        |  |  | 3.387E-07 |  |  |  | DOCK1            |  |
| V3SVHSHC_6608738  | STX17        |  |  | 3.611E-07 |  |  |  | STX17            |  |
| V3SVHSHC_6761891  | DNASE2       |  |  | 3.690E-07 |  |  |  | DNASE2           |  |
| V3SVHSHC_10080602 | GPR88        |  |  | 3.773E-07 |  |  |  | GPR88            |  |
| V3SVHSHC_7516535  | NAT1         |  |  | 3.794E-07 |  |  |  | NAT1             |  |
| V3SVHSHC_5957384  | NEUROD4      |  |  | 3.845E-07 |  |  |  | NEUROD4          |  |
| V3SVHSHC_6436214  | ATP4B        |  |  | 3.861E-07 |  |  |  | ATP4B            |  |
| V3SVHSHC_10568144 | ZNF25        |  |  | 3.918E-07 |  |  |  | ZNF25            |  |
| V3SVHSHC_5865116  | TMEM216      |  |  | 4.001E-07 |  |  |  | TMEM216          |  |
| V3SVHSHC_5498222  | C18orf56     |  |  | 4.156E-07 |  |  |  | C18orf56         |  |
| V3SVHSHC_7164326  | ZNF628       |  |  | 4.338E-07 |  |  |  | ZNF628           |  |
| V3SVHSHC_4993487  | MRPL14       |  |  | 4.372E-07 |  |  |  | MRPL14           |  |
| V3SVHSHC_9973946  | ZMYND10      |  |  | 4.466E-07 |  |  |  | ZMYND10          |  |
| V3SVHSHC_5404073  | CD82         |  |  | 4.473E-07 |  |  |  | CD82             |  |
| V3SVHSHC_8491124  | HEMGN        |  |  | 4.495E-07 |  |  |  | HEMGN            |  |
| V3SVHSHC_4786379  | PDDC1        |  |  | 4.724E-07 |  |  |  | PDDC1            |  |
| V3SVHSHC_9945863  | MROH2A       |  |  | 5.218E-07 |  |  |  | MROH2A           |  |
| V3SVHSHC_8038397  | VWA8         |  |  | 5.368E-07 |  |  |  | VWA8             |  |
| V3SVHSHC_5429780  | EPHB2        |  |  | 5.757E-07 |  |  |  | EPHB2            |  |
| V3SVHSHC_5514293  | TLE4         |  |  | 5.823E-07 |  |  |  | TLE4             |  |
| V3SVHSHC_4793408  | AMFR         |  |  | 5.860E-07 |  |  |  | AMFR             |  |
| V3SVHSHC_8382752  | CCNDBP1      |  |  | 5.992E-07 |  |  |  | CCNDBP1          |  |
| V3SVHSHC_7670051  | NOS1         |  |  | 6.011E-07 |  |  |  | NOS1             |  |
| V3SVHSHC_7854851  | IL15RA       |  |  | 6.142E-07 |  |  |  | IL15RA           |  |
| V3SVHSHC_6677345  | TSPAN12      |  |  | 6.804E-07 |  |  |  | TSPAN12          |  |
| V3SVHSHC_9523727  | RUNX3        |  |  | 7.062E-07 |  |  |  | RUNX3            |  |
| V3SVHSHC_7383050  | CDK2         |  |  | 7.120E-07 |  |  |  | CDK2             |  |
| V3SVHSHC_10152905 | POP5         |  |  | 7.578E-07 |  |  |  | POP5             |  |
| V3SVHSHC_8771393  | F13B         |  |  | 7.902E-07 |  |  |  | F13B             |  |
| V3SVHSHC_7334309  | HHLA3        |  |  | 7.910E-07 |  |  |  | HHLA3            |  |
| V3SVHSHC_5486144  | PLEKHG4B     |  |  | 8.061E-07 |  |  |  | PLEKHG4<br>B     |  |
| V3SVHSHC_6693251  | PROK2        |  |  | 8.269E-07 |  |  |  | PROK2            |  |
| V3SVHSHC_10552931 | LAMA2        |  |  | 8.285E-07 |  |  |  | LAMA2            |  |
| V3SVHSHC_10285928 | UBE2NL       |  |  | 8.725E-07 |  |  |  | UBE2NL           |  |
| V3SVHSHC_7876565  | PPM1G        |  |  | 8.999E-07 |  |  |  | PPM1G            |  |
| V3SVHSHC_8076281  | FAM160A1     |  |  | 9.077E-07 |  |  |  | FAM160A1         |  |
| V3SVHSHC_8376350  | GAB1         |  |  | 9.216E-07 |  |  |  | GAB1             |  |
| V3SVHSHC_8182541  | SPDYE4       |  |  | 9.458E-07 |  |  |  | SPDYE4           |  |
| V3SVHSHC_8875244  | MPRIP        |  |  | 9.939E-07 |  |  |  | MPRIP            |  |
| V3SVHSHC_9162377  | SLC25A47     |  |  | 1.025E-06 |  |  |  | SLC25A47         |  |
| V3SVHSHC_10328135 | DHRS3        |  |  | 1.031E-06 |  |  |  | DHRS3            |  |
| V3SVHSHC_9486272  | MYZAP        |  |  | 1.040E-06 |  |  |  | MYZAP            |  |
| V3SVHSHC_7271840  | ITGA8        |  |  | 1.075E-06 |  |  |  | ITGA8            |  |
| V3SVHSHC_10615268 | PRKX         |  |  | 1.081E-06 |  |  |  | PRKX             |  |
| V3SVHSHC_5762090  | CCNY         |  |  | 1.111E-06 |  |  |  | CCNY             |  |
| V3SVHSHC_8838779  | POLR3GL      |  |  | 1.122E-06 |  |  |  | POLR3GL          |  |
| V3SVHSHC_5179112  | MX1          |  |  | 1.165E-06 |  |  |  | MX1              |  |
| V3SVHSHC_8663648  | GSG1         |  |  | 1.206E-06 |  |  |  | GSG1             |  |
| V3SVHSHC_5486012  | RTFDC1       |  |  | 1.225E-06 |  |  |  | RTFDC1           |  |
| V3SVHSHC_6218348  | LOC101929989 |  |  | 1.244E-06 |  |  |  | LOC10192<br>9989 |  |
| V3SVHSHC_8999720  | KATNAL1      |  |  | 1.300E-06 |  |  |  | KATNAL1          |  |
| V3SVHSHC_9723674  | PIGW         |  |  | 1.385E-06 |  |  |  | PIGW             |  |

|                   |              |  |  |           |           |  |  |  |              |        |
|-------------------|--------------|--|--|-----------|-----------|--|--|--|--------------|--------|
| V3SVHSHC_10817030 | RNASE1       |  |  | 1.399E-06 |           |  |  |  | RNASE1       |        |
| V3SVHSHC_7549667  | TMEM56       |  |  | 1.419E-06 |           |  |  |  | TMEM56       |        |
| V3SVHSHC_7492181  | LOC101927662 |  |  | 1.420E-06 |           |  |  |  | LOC101927662 |        |
| V3SVHSHC_10816601 | ERCC8        |  |  | 1.463E-06 |           |  |  |  | ERCC8        |        |
| V3SVHSHC_9430139  | DENND6A      |  |  | 1.504E-06 |           |  |  |  | DENND6A      |        |
| V3SVHSHC_7047275  | NPR1         |  |  | 1.547E-06 |           |  |  |  | NPR1         |        |
| V3SVHSHC_5645072  | C20ORF85     |  |  | 1.586E-06 |           |  |  |  | C20ORF85     |        |
| V3SVHSHC_5641805  | DEFB107A     |  |  | 1.607E-06 |           |  |  |  | DEFB107A     |        |
| V3SVHSHC_5951048  | KIAA0100     |  |  | 1.627E-06 |           |  |  |  | KIAA0100     |        |
| V3SVHSHC_6887258  | C9ORF85      |  |  | 1.636E-06 |           |  |  |  | C9ORF85      |        |
| V3SVHSHC_7537556  | ST6GALNAC5   |  |  | 1.648E-06 |           |  |  |  | ST6GALNAC5   |        |
| V3SVHSHC_7774034  | FOXN2        |  |  | 1.667E-06 |           |  |  |  | FOXN2        |        |
| V3SVHSHC_5364440  | FGF9         |  |  | 1.686E-06 |           |  |  |  | FGF9         |        |
| V3SVHSHC_7813370  | NAPEPLD      |  |  | 1.767E-06 |           |  |  |  | NAPEPLD      |        |
| V3SVHSHC_5391698  | NIPAL4       |  |  | 1.792E-06 |           |  |  |  | NIPAL4       |        |
| V3SVHSHC_5755622  | VPREB3       |  |  | 1.806E-06 |           |  |  |  | VPREB3       |        |
| V3SVHSHC_5085326  | FAM110D      |  |  | 1.813E-06 |           |  |  |  | FAM110D      |        |
| V3SVHSHC_8380838  | SCUBE2       |  |  | 1.836E-06 |           |  |  |  | SCUBE2       |        |
| V3SVHSHC_9985232  | UBE2D3       |  |  | 1.977E-06 |           |  |  |  | UBE2D3       |        |
| V3SVHSHC_10165313 | FMN2         |  |  | 1.995E-06 |           |  |  |  | FMN2         |        |
| V3SVHSHC_8685824  | SLC44A1      |  |  | 2.078E-06 |           |  |  |  | SLC44A1      |        |
| V3SVHSHC_7523168  | PDE1C        |  |  | 2.276E-06 |           |  |  |  | PDE1C        |        |
| V3SVHSHC_6388397  | TSGA10IP     |  |  | 2.425E-06 |           |  |  |  | TSGA10IP     |        |
| V3SVHSHC_9910553  | C19orf33     |  |  | 2.545E-06 |           |  |  |  | C19orf33     |        |
| V3SVHSHC_8777630  | C2orf69      |  |  | 2.588E-06 |           |  |  |  | C2orf69      |        |
| V3SVHSHC_6469016  | CYP27B1      |  |  | 2.613E-06 |           |  |  |  | CYP27B1      |        |
| V3SVHSHC_6697640  | SMIM15       |  |  | 2.705E-06 |           |  |  |  | SMIM15       |        |
| V3SVHSHC_6519572  | VIPR2        |  |  | 2.732E-06 |           |  |  |  | VIPR2        |        |
| V3SVHSHC_5785949  | ANKS1A       |  |  | 2.789E-06 |           |  |  |  | ANKS1A       |        |
| V3SVHSHC_10110071 | SMCO2        |  |  | 2.790E-06 |           |  |  |  | SMCO2        |        |
| V3SVHSHC_8927549  | C5AR2        |  |  | 3.049E-06 |           |  |  |  | C5AR2        |        |
| V3SVHSHC_10562204 | DLG3         |  |  | 3.074E-06 |           |  |  |  | DLG3         |        |
| V3SVHSHC_7258772  | RGS5         |  |  | 3.104E-06 |           |  |  |  | RGS5         |        |
| V3SVHSHC_10237220 | TRIM71       |  |  | 3.289E-06 |           |  |  |  | TRIM71       |        |
| V3SVHSHC_9023282  | PON1         |  |  | 3.354E-06 |           |  |  |  | PON1         |        |
| V3SVHSHC_9736907  | ADCY6        |  |  | 3.440E-06 |           |  |  |  | ADCY6        |        |
| V3SVHSHC_7494227  | SLC12A4      |  |  | 3.497E-06 |           |  |  |  | SLC12A4      |        |
| V3SVHSHC_8190626  | DNAI1        |  |  | 3.513E-06 |           |  |  |  | DNAI1        |        |
| V3SVHSHC_6275801  | SLC30A8      |  |  | 3.559E-06 |           |  |  |  | SLC30A8      |        |
| V3SVHSHC_10227353 | OXT          |  |  | 3.595E-06 |           |  |  |  | OXT          |        |
| V3SVHSHC_8048297  | C2orf47      |  |  | 3.644E-06 |           |  |  |  | C2orf47      |        |
| V3SVHSHC_10362983 | SHMT2        |  |  | 3.812E-06 |           |  |  |  | SHMT2        |        |
| V3SVHSHC_7799345  | CACNB1       |  |  | 3.842E-06 | 1.051E-13 |  |  |  | CACNB1       | CACNB1 |
| V3SVHSHC_10162244 | SLC25A22     |  |  | 3.929E-06 |           |  |  |  | SLC25A22     |        |
| V3SVHSHC_5673155  | C17orf78     |  |  | 4.010E-06 |           |  |  |  | C17orf78     |        |
| V3SVHSHC_10026185 | RBP3         |  |  | 4.025E-06 |           |  |  |  | RBP3         |        |
| V3SVHSHC_8598869  | HIST1H2BK    |  |  | 4.070E-06 |           |  |  |  | HIST1H2BK    |        |
| V3SVHSHC_10096838 | IPO7         |  |  | 4.075E-06 |           |  |  |  | IPO7         |        |
| V3SVHSHC_6661901  | GPR158       |  |  | 4.108E-06 |           |  |  |  | GPR158       |        |
| V3SVHSHC_4848716  | COX7A2       |  |  | 4.300E-06 |           |  |  |  | COX7A2       |        |
| V3SVHSHC_5218910  | GRIA4        |  |  | 4.350E-06 |           |  |  |  | GRIA4        |        |
| V3SVHSHC_9714401  | ACSM3        |  |  | 4.352E-06 |           |  |  |  | ACSM3        |        |

|                   |           |  |  |           |           |  |  |           |          |
|-------------------|-----------|--|--|-----------|-----------|--|--|-----------|----------|
| V3SVHSHC_8522177  | BLOC1S3   |  |  | 4.360E-06 |           |  |  | BLOC1S3   |          |
| V3SVHSHC_9415817  | CT45A3    |  |  | 4.694E-06 |           |  |  | CT45A3    |          |
| V3SVHSHC_8218115  | CXORF23   |  |  | 4.719E-06 |           |  |  | CXORF23   |          |
| V3SVHSHC_10078688 | RAC1      |  |  | 4.967E-06 |           |  |  | RAC1      |          |
| V3SVHSHC_7150301  | SFT2D1    |  |  | 5.010E-06 |           |  |  | SFT2D1    |          |
| V3SVHSHC_6962333  | NOP10     |  |  | 5.039E-06 |           |  |  | NOP10     |          |
| V3SVHSHC_8393510  | CREB5     |  |  | 5.342E-06 |           |  |  | CREB5     |          |
| V3SVHSHC_9053180  | FAM25A    |  |  | 5.401E-06 |           |  |  | FAM25A    |          |
| V3SVHSHC_10266425 | LOC642441 |  |  | 5.548E-06 |           |  |  | LOC642441 |          |
| V3SVHSHC_10713938 | PRAME     |  |  | 5.650E-06 |           |  |  | PRAME     |          |
| V3SVHSHC_5729783  | BOK       |  |  | 5.683E-06 |           |  |  | BOK       |          |
| V3SVHSHC_7854356  | SCAF8     |  |  | 5.695E-06 |           |  |  | SCAF8     |          |
| V3SVHSHC_5012528  | TESC      |  |  | 5.724E-06 |           |  |  | TESC      |          |
| V3SVHSHC_4826210  | HUS1      |  |  | 5.734E-06 |           |  |  | HUS1      |          |
| V3SVHSHC_7867160  | GDAP1     |  |  | 5.961E-06 |           |  |  | GDAP1     |          |
| V3SVHSHC_7718297  | PENK      |  |  | 5.962E-06 |           |  |  | PENK      |          |
| V3SVHSHC_5914583  | PRRT3     |  |  | 6.343E-06 |           |  |  | PRRT3     |          |
| V3SVHSHC_8827790  | TNFSF15   |  |  | 6.424E-06 |           |  |  | TNFSF15   |          |
| V3SVHSHC_10561247 | HPSE2     |  |  | 6.503E-06 |           |  |  | HPSE2     |          |
| V3SVHSHC_5227523  | BAK1      |  |  | 6.705E-06 |           |  |  | BAK1      |          |
| V3SVHSHC_4862939  | MYH14     |  |  | 6.796E-06 |           |  |  | MYH14     |          |
| V3SVHSHC_6101363  | AVIL      |  |  | 6.858E-06 |           |  |  | AVIL      |          |
| V3SVHSHC_8008862  | CMAS      |  |  | 7.212E-06 |           |  |  | CMAS      |          |
| V3SVHSHC_5841917  | XRCC2     |  |  | 7.262E-06 |           |  |  | XRCC2     |          |
| V3SVHSHC_9708890  | CTAGE15   |  |  | 7.567E-06 |           |  |  | CTAGE15   |          |
| V3SVHSHC_4904453  | OR6C74    |  |  | 7.869E-06 |           |  |  | OR6C74    |          |
| V3SVHSHC_6803438  | CLDN17    |  |  | 8.036E-06 |           |  |  | CLDN17    |          |
| V3SVHSHC_10280186 | TULP2     |  |  | 8.420E-06 |           |  |  | TULP2     |          |
| V3SVHSHC_10301405 | FSTL3     |  |  | 8.477E-06 |           |  |  | FSTL3     |          |
| V3SVHSHC_5926100  | SLC38A5   |  |  | 8.862E-06 |           |  |  | SLC38A5   |          |
| V3SVHSHC_4801955  | AP5S1     |  |  | 8.961E-06 |           |  |  | AP5S1     |          |
| V3SVHSHC_5270357  | PDZD8     |  |  | 8.962E-06 |           |  |  | PDZD8     |          |
| V3SVHSHC_10001138 | TIMM17A   |  |  | 9.233E-06 |           |  |  | TIMM17A   |          |
| V3SVHSHC_6546863  | NCKAP1L   |  |  | 9.273E-06 |           |  |  | NCKAP1L   |          |
| V3SVHSHC_5277155  | APOB      |  |  | 9.592E-06 |           |  |  | APOB      |          |
| V3SVHSHC_5043020  | SETD8     |  |  | 9.793E-06 |           |  |  | SETD8     |          |
| V3SVHSHC_9728294  | DVL3      |  |  | 1.040E-05 |           |  |  | DVL3      |          |
| V3SVHSHC_7545575  | ING3      |  |  | 1.053E-05 |           |  |  | ING3      |          |
| V3SVHSHC_6099581  | ATP6V0C   |  |  | 1.061E-05 |           |  |  | ATP6V0C   |          |
| V3SVHSHC_10393772 | MYL3      |  |  | 1.075E-05 |           |  |  | MYL3      |          |
| V3SVHSHC_7024109  | LRRIQ1    |  |  | 1.109E-05 |           |  |  | LRRIQ1    |          |
| V3SVHSHC_8891513  | KHDC1L    |  |  | 1.146E-05 |           |  |  | KHDC1L    |          |
| V3SVHSHC_8756708  | CDC25C    |  |  | 1.163E-05 |           |  |  | CDC25C    |          |
| V3SVHSHC_7387637  | Siglec15  |  |  | 1.192E-05 | 2.442E-06 |  |  | Siglec15  | Siglec15 |
| V3SVHSHC_4771859  | ESPN      |  |  | 1.214E-05 |           |  |  | ESPN      |          |
| V3SVHSHC_5540000  | INTU      |  |  | 1.216E-05 |           |  |  | INTU      |          |
| V3SVHSHC_9723707  | SLC13A5   |  |  | 1.256E-05 |           |  |  | SLC13A5   |          |
| V3SVHSHC_8957678  | TRIM32    |  |  | 1.260E-05 |           |  |  | TRIM32    |          |
| V3SVHSHC_7282070  | SEMA4F    |  |  | 1.279E-05 |           |  |  | SEMA4F    |          |
| V3SVHSHC_9519866  | SEZ6L     |  |  | 1.358E-05 |           |  |  | SEZ6L     |          |
| V3SVHSHC_10579595 | HSPBP1    |  |  | 1.420E-05 |           |  |  | HSPBP1    |          |
| V3SVHSHC_4848452  | SLC18A2   |  |  | 1.442E-05 |           |  |  | SLC18A2   |          |
| V3SVHSHC_5031173  | TBC1D21   |  |  | 1.452E-05 |           |  |  | TBC1D21   |          |
| V3SVHSHC_5432255  | FKBP2     |  |  | 1.467E-05 |           |  |  | FKBP2     |          |

|                   |          |  |  |           |  |  |  |          |  |
|-------------------|----------|--|--|-----------|--|--|--|----------|--|
| V3SVHSHC_4857956  | C5orf51  |  |  | 1.480E-05 |  |  |  | C5orf51  |  |
| V3SVHSHC_8230919  | ATP4B    |  |  | 1.519E-05 |  |  |  | ATP4B    |  |
| V3SVHSHC_6508682  | FARP2    |  |  | 1.545E-05 |  |  |  | FARP2    |  |
| V3SVHSHC_4912769  | FCGR1B   |  |  | 1.549E-05 |  |  |  | FCGR1B   |  |
| V3SVHSHC_7978304  | FAM83B   |  |  | 1.571E-05 |  |  |  | FAM83B   |  |
| V3SVHSHC_10204880 | CEACAM5  |  |  | 1.619E-05 |  |  |  | CEACAM5  |  |
| V3SVHSHC_6574682  | EMR1     |  |  | 1.646E-05 |  |  |  | EMR1     |  |
| V3SVHSHC_5224784  | DSC1     |  |  | 1.784E-05 |  |  |  | DSC1     |  |
| V3SVHSHC_7814360  | SLC35G1  |  |  | 1.803E-05 |  |  |  | SLC35G1  |  |
| V3SVHSHC_9760766  | C5orf22  |  |  | 1.825E-05 |  |  |  | C5orf22  |  |
| V3SVHSHC_9941276  | GEMIN7   |  |  | 1.840E-05 |  |  |  | GEMIN7   |  |
| V3SVHSHC_10531250 | COL2A1   |  |  | 1.918E-05 |  |  |  | COL2A1   |  |
| V3SVHSHC_10486931 | ZNF385A  |  |  | 1.933E-05 |  |  |  | ZNF385A  |  |
| V3SVHSHC_10827920 | BIRC6    |  |  | 2.034E-05 |  |  |  | BIRC6    |  |
| V3SVHSHC_10174850 | SMR3A    |  |  | 2.054E-05 |  |  |  | SMR3A    |  |
| V3SVHSHC_6762881  | PPP3CA   |  |  | 2.144E-05 |  |  |  | PPP3CA   |  |
| V3SVHSHC_6855710  | IQCB1    |  |  | 2.145E-05 |  |  |  | IQCB1    |  |
| V3SVHSHC_5427206  | Agap1    |  |  | 2.165E-05 |  |  |  | Agap1    |  |
| V3SVHSHC_5577191  | C12orf50 |  |  | 2.246E-05 |  |  |  | C12orf50 |  |
| V3SVHSHC_7611575  | IGFN1    |  |  | 2.309E-05 |  |  |  | IGFN1    |  |
| V3SVHSHC_5059586  | CTSW     |  |  | 2.316E-05 |  |  |  | CTSW     |  |
| V3SVHSHC_9854123  | SCGB3A2  |  |  | 2.382E-05 |  |  |  | SCGB3A2  |  |
| V3SVHSHC_4984907  | SERHL2   |  |  | 2.486E-05 |  |  |  | SERHL2   |  |
| V3SVHSHC_5135486  | WDR81    |  |  | 2.523E-05 |  |  |  | WDR81    |  |
| V3SVHSHC_8366648  | PLB1     |  |  | 2.524E-05 |  |  |  | PLB1     |  |
| V3SVHSHC_7254218  | TMEM167A |  |  | 2.574E-05 |  |  |  | TMEM167A |  |
| V3SVHSHC_5058662  | USP7     |  |  | 2.601E-05 |  |  |  | USP7     |  |
| V3SVHSHC_5003387  | MARCO    |  |  | 2.660E-05 |  |  |  | MARCO    |  |
| V3SVHSHC_5360645  | RFXANK   |  |  | 2.756E-05 |  |  |  | RFXANK   |  |
| V3SVHSHC_7151423  | TMEM229A |  |  | 2.845E-05 |  |  |  | TMEM229A |  |
| V3SVHSHC_5252933  | GJA8     |  |  | 2.872E-05 |  |  |  | GJA8     |  |
| V3SVHSHC_10691729 | OR5M3    |  |  | 2.929E-05 |  |  |  | OR5M3    |  |
| V3SVHSHC_9233030  | FRAT1    |  |  | 2.967E-05 |  |  |  | FRAT1    |  |
| V3SVHSHC_10552205 | ZNF678   |  |  | 3.059E-05 |  |  |  | ZNF678   |  |
| V3SVHSHC_6999656  | SCOC     |  |  | 3.074E-05 |  |  |  | SCOC     |  |
| V3SVHSHC_6109514  | RANBP2   |  |  | 3.104E-05 |  |  |  | RANBP2   |  |
| V3SVHSHC_9222932  | NSUN7    |  |  | 3.130E-05 |  |  |  | NSUN7    |  |
| V3SVHSHC_9892502  | KIAA1328 |  |  | 3.173E-05 |  |  |  | KIAA1328 |  |
| V3SVHSHC_9218279  | HELZ2    |  |  | 3.256E-05 |  |  |  | HELZ2    |  |
| V3SVHSHC_7051268  | EMD      |  |  | 3.468E-05 |  |  |  | EMD      |  |
| V3SVHSHC_9518348  | TRUB1    |  |  | 3.522E-05 |  |  |  | TRUB1    |  |
| V3SVHSHC_8256857  | Sec16a   |  |  | 3.591E-05 |  |  |  | Sec16a   |  |
| V3SVHSHC_8820365  | PTGDR2   |  |  | 3.620E-05 |  |  |  | PTGDR2   |  |
| V3SVHSHC_10384994 | SLC25A28 |  |  | 3.650E-05 |  |  |  | SLC25A28 |  |
| V3SVHSHC_5648834  | CTBS     |  |  | 3.772E-05 |  |  |  | CTBS     |  |
| V3SVHSHC_7411034  | RNF181   |  |  | 3.886E-05 |  |  |  | RNF181   |  |
| V3SVHSHC_5380280  | CNEP1R1  |  |  | 3.976E-05 |  |  |  | CNEP1R1  |  |
| V3SVHSHC_6675992  | SNRNP27  |  |  | 3.995E-05 |  |  |  | SNRNP27  |  |
| V3SVHSHC_5662232  | MS4A4A   |  |  | 4.098E-05 |  |  |  | MS4A4A   |  |
| V3SVHSHC_9406280  | TNNI2    |  |  | 4.150E-05 |  |  |  | TNNI2    |  |
| V3SVHSHC_5620421  | RAB20    |  |  | 4.168E-05 |  |  |  | RAB20    |  |
| V3SVHSHC_10809836 | GTF2E1   |  |  | 4.359E-05 |  |  |  | GTF2E1   |  |
| V3SVHSHC_5595374  | GON4L    |  |  | 4.660E-05 |  |  |  | GON4L    |  |

|                   |              |  |  |           |           |  |  |              |       |
|-------------------|--------------|--|--|-----------|-----------|--|--|--------------|-------|
| V3SVHSHC_6607286  | NUSAP1       |  |  | 4.923E-05 |           |  |  | NUSAP1       |       |
| V3SVHSHC_6678434  | IL5RA        |  |  | 5.194E-05 | 7.806E-04 |  |  | IL5RA        |       |
| V3SVHSHC_5097668  | KIF27        |  |  | 5.315E-05 |           |  |  | KIF27        |       |
| V3SVHSHC_8600849  | NDUFA10      |  |  | 5.503E-05 |           |  |  | NDUFA10      |       |
| V3SVHSHC_9755288  | STRA13       |  |  | 5.568E-05 |           |  |  | STRA13       |       |
| V3SVHSHC_8587352  | TMEM242      |  |  | 5.805E-05 |           |  |  | TMEM242      |       |
| V3SVHSHC_6033416  | DHCR7        |  |  | 5.855E-05 |           |  |  | DHCR7        |       |
| V3SVHSHC_6003947  | KRT10        |  |  | 5.906E-05 |           |  |  | KRT10        |       |
| V3SVHSHC_9784130  | HBEGF        |  |  | 5.963E-05 |           |  |  | HBEGF        |       |
| V3SVHSHC_8902535  | NALCN        |  |  | 6.251E-05 |           |  |  | NALCN        |       |
| V3SVHSHC_5417537  | TINAG        |  |  | 6.267E-05 |           |  |  | TINAG        |       |
| V3SVHSHC_10692719 | GUCD1        |  |  | 6.310E-05 |           |  |  | GUCD1        |       |
| V3SVHSHC_10597349 | MYOM3        |  |  | 6.372E-05 | 3.790E-16 |  |  | MYOM3        | MYOM3 |
| V3SVHSHC_7878182  | SEMA4G       |  |  | 6.735E-05 |           |  |  | SEMA4G       |       |
| V3SVHSHC_9185939  | CCL2         |  |  | 6.793E-05 |           |  |  | CCL2         |       |
| V3SVHSHC_7613126  | OTX2         |  |  | 6.825E-05 |           |  |  | OTX2         |       |
| V3SVHSHC_8926427  | SLC45A2      |  |  | 6.977E-05 |           |  |  | SLC45A2      |       |
| V3SVHSHC_9505214  | GPR149       |  |  | 7.119E-05 |           |  |  | GPR149       |       |
| V3SVHSHC_8354009  | EDEM1        |  |  | 7.134E-05 | 8.380E-06 |  |  | EDEM1        | EDEM1 |
| V3SVHSHC_9657641  | SULT1A2      |  |  | 7.309E-05 |           |  |  | SULT1A2      |       |
| V3SVHSHC_8813204  | CCDC115      |  |  | 7.636E-05 |           |  |  | CCDC115      |       |
| V3SVHSHC_7124330  | C17orf104    |  |  | 7.819E-05 |           |  |  | C17orf104    |       |
| V3SVHSHC_7202969  | RETNLB       |  |  | 7.924E-05 |           |  |  | RETNLB       |       |
| V3SVHSHC_6537161  | MRGPRX4      |  |  | 8.183E-05 |           |  |  | MRGPRX4      |       |
| V3SVHSHC_6584219  | LOC101929766 |  |  | 8.257E-05 |           |  |  | LOC101929766 |       |
| V3SVHSHC_9570785  | TIMM17A      |  |  | 8.407E-05 |           |  |  | TIMM17A      |       |
| V3SVHSHC_9038627  | ARL2BP       |  |  | 8.515E-05 |           |  |  | ARL2BP       |       |
| V3SVHSHC_9348134  | OR2A1        |  |  | 8.905E-05 |           |  |  | OR2A1        |       |
| V3SVHSHC_4754831  | ADIG         |  |  | 9.101E-05 |           |  |  | ADIG         |       |
| V3SVHSHC_5234024  | WBSCR16      |  |  | 9.139E-05 |           |  |  | WBSCR16      |       |
| V3SVHSHC_10744562 | ZSCAN12      |  |  | 9.535E-05 |           |  |  | ZSCAN12      |       |
| V3SVHSHC_7636391  | LIAS         |  |  | 1.008E-04 |           |  |  | LIAS         |       |
| V3SVHSHC_7864685  | CTLA4        |  |  | 1.008E-04 |           |  |  | CTLA4        |       |
| V3SVHSHC_9660842  | NOTO         |  |  | 1.033E-04 |           |  |  | NOTO         |       |
| V3SVHSHC_6263921  | MTURN        |  |  | 1.063E-04 |           |  |  | MTURN        |       |
| V3SVHSHC_9865706  | SHANK3       |  |  | 1.066E-04 |           |  |  | SHANK3       |       |
| V3SVHSHC_4994576  | KRT84        |  |  | 1.076E-04 |           |  |  | KRT84        |       |
| V3SVHSHC_5630717  | PLIN4        |  |  | 1.081E-04 |           |  |  | PLIN4        |       |
| V3SVHSHC_5384273  | SPG21        |  |  | 1.127E-04 |           |  |  | SPG21        |       |
| V3SVHSHC_6111956  | FAM78B       |  |  | 1.204E-04 |           |  |  | FAM78B       |       |
| V3SVHSHC_7458554  | TMEM161A     |  |  | 1.249E-04 |           |  |  | TMEM161A     |       |
| V3SVHSHC_10043246 | PVR          |  |  | 1.279E-04 |           |  |  | PVR          |       |
| V3SVHSHC_5421563  | RNASE9       |  |  | 1.328E-04 |           |  |  | RNASE9       |       |
| V3SVHSHC_4895147  | UBB          |  |  | 1.422E-04 |           |  |  | UBB          |       |
| V3SVHSHC_6104993  | TRDN         |  |  | 1.482E-04 |           |  |  | TRDN         |       |
| V3SVHSHC_5764796  | TNNC1        |  |  | 1.503E-04 |           |  |  | TNNC1        |       |
| V3SVHSHC_7707539  | LITAF        |  |  | 1.532E-04 | 2.526E-03 |  |  | LITAF        |       |
| V3SVHSHC_10347770 | ZFYVE19      |  |  | 1.718E-04 |           |  |  | ZFYVE19      |       |
| V3SVHSHC_4866965  | RANBP6       |  |  | 1.741E-04 |           |  |  | RANBP6       |       |
| V3SVHSHC_9955235  | PKD1L3       |  |  | 1.781E-04 |           |  |  | PKD1L3       |       |
| V3SVHSHC_7036880  | OR4K5        |  |  | 1.875E-04 |           |  |  | OR4K5        |       |
| V3SVHSHC_9387602  | PFKFB2       |  |  | 1.945E-04 |           |  |  | PFKFB2       |       |
| V3SVHSHC_10489109 | C5orf60      |  |  | 1.954E-04 |           |  |  | C5orf60      |       |



|                   |          |  |  |           |           |  |  |          |        |
|-------------------|----------|--|--|-----------|-----------|--|--|----------|--------|
| V3SVHSHC_7893659  | SEMA5A   |  |  | 1.980E-04 |           |  |  | SEMA5A   |        |
| V3SVHSHC_7069946  | WDR87    |  |  | 1.991E-04 |           |  |  | WDR87    |        |
| V3SVHSHC_10174751 | TMEM109  |  |  | 2.036E-04 |           |  |  | TMEM109  |        |
| V3SVHSHC_8310284  | DPP7     |  |  | 2.055E-04 |           |  |  | DPP7     |        |
| V3SVHSHC_4698401  | RCCD1    |  |  | 2.061E-04 |           |  |  | RCCD1    |        |
| V3SVHSHC_8368001  | SH2D4A   |  |  | 2.097E-04 |           |  |  | SH2D4A   |        |
| V3SVHSHC_6485153  | TRPV4    |  |  | 2.152E-04 |           |  |  | TRPV4    |        |
| V3SVHSHC_4848386  | ING2     |  |  | 2.363E-04 |           |  |  | ING2     |        |
| V3SVHSHC_5708861  | KRT27    |  |  | 2.406E-04 |           |  |  | KRT27    |        |
| V3SVHSHC_10374665 | SFTPD    |  |  | 2.416E-04 |           |  |  | SFTPD    |        |
| V3SVHSHC_5747207  | GAGE12J  |  |  | 2.472E-04 |           |  |  | GAGE12J  |        |
| V3SVHSHC_5150105  | SPAST    |  |  | 2.487E-04 |           |  |  | SPAST    |        |
| V3SVHSHC_6419912  | INTS1    |  |  | 2.542E-04 |           |  |  | INTS1    |        |
| V3SVHSHC_7266263  | KIF18B   |  |  | 2.618E-04 | 6.749E-07 |  |  | KIF18B   | KIF18B |
| V3SVHSHC_6471920  | ATP10D   |  |  | 2.705E-04 |           |  |  | ATP10D   |        |
| V3SVHSHC_10707173 | C17orf80 |  |  | 2.716E-04 |           |  |  | C17orf80 |        |
| V3SVHSHC_9776111  | PATE1    |  |  | 2.817E-04 |           |  |  | PATE1    |        |
| V3SVHSHC_5330054  | CARHSP1  |  |  | 3.019E-04 |           |  |  | CARHSP1  |        |
| V3SVHSHC_4914221  | HNF1B    |  |  | 3.070E-04 |           |  |  | HNF1B    |        |
| V3SVHSHC_10237583 | CHD1     |  |  | 3.077E-04 |           |  |  | CHD1     |        |
| V3SVHSHC_7786838  | BAI1     |  |  | 3.134E-04 |           |  |  | BAI1     |        |
| V3SVHSHC_7791491  | SLC35G6  |  |  | 3.193E-04 |           |  |  | SLC35G6  |        |
| V3SVHSHC_10345955 | LIAS     |  |  | 3.248E-04 |           |  |  | LIAS     |        |
| V3SVHSHC_4725593  | Llph     |  |  | 3.318E-04 |           |  |  | Llph     |        |
| V3SVHSHC_9320282  | SEPT1    |  |  | 3.398E-04 |           |  |  | SEPT1    |        |
| V3SVHSHC_8824886  | GALP     |  |  | 3.431E-04 |           |  |  | GALP     |        |
| V3SVHSHC_9228245  | TLX2     |  |  | 3.576E-04 |           |  |  | TLX2     |        |
| V3SVHSHC_8133998  | PINX1    |  |  | 3.606E-04 |           |  |  | PINX1    |        |
| V3SVHSHC_8498681  | CNR2     |  |  | 3.691E-04 |           |  |  | CNR2     |        |
| V3SVHSHC_10029749 | KLK7     |  |  | 3.699E-04 |           |  |  | KLK7     |        |
| V3SVHSHC_7682426  | HNRNPCP5 |  |  | 3.813E-04 |           |  |  | HNRNPCP5 |        |
| V3SVHSHC_5096216  | HECTD3   |  |  | 3.938E-04 |           |  |  | HECTD3   |        |
| V3SVHSHC_5018864  | OLIG3    |  |  | 4.105E-04 |           |  |  | OLIG3    |        |
| V3SVHSHC_9039452  | TOR3A    |  |  | 4.188E-04 |           |  |  | TOR3A    |        |
| V3SVHSHC_6530396  | PPP3R2   |  |  | 4.190E-04 |           |  |  | PPP3R2   |        |
| V3SVHSHC_5172578  | EBF2     |  |  | 4.285E-04 |           |  |  | EBF2     |        |
| V3SVHSHC_6404468  | SOX10    |  |  | 4.353E-04 |           |  |  | SOX10    |        |
| V3SVHSHC_5778788  | C11orf58 |  |  | 4.576E-04 |           |  |  | C11orf58 |        |
| V3SVHSHC_7194686  | SLCO1B1  |  |  | 4.681E-04 |           |  |  | SLCO1B1  |        |
| V3SVHSHC_5782187  | H1FNT    |  |  | 4.709E-04 |           |  |  | H1FNT    |        |
| V3SVHSHC_7414499  | OCSTAMP  |  |  | 4.714E-04 | 3.426E-01 |  |  | OCSTAMP  |        |
| V3SVHSHC_8368727  | TMPRSS4  |  |  | 5.086E-04 |           |  |  | TMPRSS4  |        |
| V3SVHSHC_10079975 | PROM2    |  |  | 5.230E-04 |           |  |  | PROM2    |        |
| V3SVHSHC_9751130  | SCARA3   |  |  | 5.498E-04 |           |  |  | SCARA3   |        |
| V3SVHSHC_4716650  | FPR2     |  |  | 5.511E-04 |           |  |  | FPR2     |        |
| V3SVHSHC_7662395  | CNR2     |  |  | 5.556E-04 |           |  |  | CNR2     |        |
| V3SVHSHC_10846928 | MARCKSL1 |  |  | 6.249E-04 |           |  |  | MARCKSL1 |        |
| V3SVHSHC_8468849  | MYF6     |  |  | 6.295E-04 |           |  |  | MYF6     |        |
| V3SVHSHC_8299724  | ZBTB32   |  |  | 6.312E-04 |           |  |  | ZBTB32   |        |
| V3SVHSHC_8828780  | USP40    |  |  | 6.623E-04 |           |  |  | USP40    |        |
| V3SVHSHC_7685693  | P4HTM    |  |  | 6.739E-04 |           |  |  | P4HTM    |        |
| V3SVHSHC_6111527  | OTUB1    |  |  | 6.759E-04 |           |  |  | OTUB1    |        |

|                   |              |  |  |           |           |  |  |  |         |              |
|-------------------|--------------|--|--|-----------|-----------|--|--|--|---------|--------------|
| V3SVHSHC_4724735  | TMPRSS2      |  |  | 7.009E-04 |           |  |  |  | TMPRSS2 |              |
| V3SVHSHC_7898345  | C4orf26      |  |  | 7.299E-04 |           |  |  |  | C4orf26 |              |
| V3SVHSHC_6317150  | PLXNA2       |  |  | 7.325E-04 |           |  |  |  | PLXNA2  |              |
| V3SVHSHC_9905834  | ICAM3        |  |  | 7.347E-04 |           |  |  |  | ICAM3   |              |
| V3SVHSHC_6905507  | NCKAP5       |  |  | 7.386E-04 |           |  |  |  | NCKAP5  |              |
| V3SVHSHC_10686614 | PPP1R35      |  |  | 7.616E-04 | 2.258E-22 |  |  |  | PPP1R35 | PPP1R35      |
| V3SVHSHC_7649063  | VTI1B        |  |  | 7.759E-04 |           |  |  |  | VTI1B   |              |
| V3SVHSHC_9544616  | ZFP14        |  |  | 7.801E-04 |           |  |  |  | ZFP14   |              |
| V3SVHSHC_9243326  | RYBP         |  |  | 7.803E-04 |           |  |  |  | RYBP    |              |
| V3SVHSHC_4778657  | Msmg         |  |  | 7.910E-04 |           |  |  |  | Msmg    |              |
| V3SVHSHC_7435256  | CHRM4        |  |  | 8.124E-04 |           |  |  |  | CHRM4   |              |
| V3SVHSHC_8994440  | MAPK6        |  |  | 8.784E-04 |           |  |  |  |         |              |
| V3SVHSHC_9499736  | CLPTM1L      |  |  | 8.910E-04 |           |  |  |  |         |              |
| V3SVHSHC_6331406  | ANGPT2       |  |  | 9.061E-04 |           |  |  |  |         |              |
| V3SVHSHC_6715856  | SLC25A10     |  |  | 9.433E-04 |           |  |  |  |         |              |
| V3SVHSHC_7891085  | NR2F6        |  |  | 9.655E-04 |           |  |  |  |         |              |
| V3SVHSHC_7653683  | CEP250       |  |  | 9.667E-04 |           |  |  |  |         |              |
| V3SVHSHC_8223758  | ALDH16A1     |  |  | 9.692E-04 |           |  |  |  |         |              |
| V3SVHSHC_9565901  | TMEM144      |  |  | 1.009E-03 | 3.091E-06 |  |  |  |         | TMEM144      |
| V3SVHSHC_7231646  | C8orf59      |  |  | 1.018E-03 |           |  |  |  |         |              |
| V3SVHSHC_5947847  | ACBD6        |  |  | 1.020E-03 |           |  |  |  |         |              |
| V3SVHSHC_6724667  | ZNF81        |  |  | 1.038E-03 |           |  |  |  |         |              |
| V3SVHSHC_6200825  | Stap1        |  |  | 1.067E-03 |           |  |  |  |         |              |
| V3SVHSHC_6547688  | HSD17B10     |  |  | 1.122E-03 |           |  |  |  |         |              |
| V3SVHSHC_6273194  | SYT16        |  |  | 1.136E-03 |           |  |  |  |         |              |
| V3SVHSHC_10650809 | STIP1        |  |  | 1.150E-03 |           |  |  |  |         |              |
| V3SVHSHC_6680117  | ADARB2       |  |  | 1.151E-03 |           |  |  |  |         |              |
| V3SVHSHC_6537986  | TRAPPC6B     |  |  | 1.152E-03 |           |  |  |  |         |              |
| V3SVHSHC_10306454 | UBB          |  |  | 1.212E-03 |           |  |  |  |         |              |
| V3SVHSHC_6841982  | SEC31B       |  |  | 1.220E-03 |           |  |  |  |         |              |
| V3SVHSHC_9448421  | MAD2L1       |  |  | 1.271E-03 |           |  |  |  |         |              |
| V3SVHSHC_10535177 | ATG13        |  |  | 1.362E-03 |           |  |  |  |         |              |
| V3SVHSHC_7510463  | CA5B         |  |  | 1.377E-03 |           |  |  |  |         |              |
| V3SVHSHC_5276825  | ZSCAN9       |  |  | 1.379E-03 | 4.186E-01 |  |  |  |         |              |
| V3SVHSHC_8040707  | C11orf82     |  |  | 1.410E-03 |           |  |  |  |         |              |
| V3SVHSHC_9378857  | EPHX3        |  |  | 1.436E-03 |           |  |  |  |         |              |
| V3SVHSHC_8104661  | LIPE         |  |  | 1.440E-03 |           |  |  |  |         |              |
| V3SVHSHC_5177990  | AKR1B15      |  |  | 1.488E-03 |           |  |  |  |         |              |
| V3SVHSHC_7919828  | RNF183       |  |  | 1.579E-03 |           |  |  |  |         |              |
| V3SVHSHC_7566926  | AMPD2        |  |  | 1.641E-03 |           |  |  |  |         |              |
| V3SVHSHC_6500828  | UTS2         |  |  | 1.656E-03 |           |  |  |  |         |              |
| V3SVHSHC_5452715  | ALOX12       |  |  | 1.769E-03 |           |  |  |  |         |              |
| V3SVHSHC_5541947  | LOC101060275 |  |  | 1.778E-03 | 2.271E-09 |  |  |  |         | LOC101060275 |
| V3SVHSHC_5892308  | GLIS3        |  |  | 1.813E-03 |           |  |  |  |         |              |
| V3SVHSHC_7306193  | CTAGE1       |  |  | 1.914E-03 |           |  |  |  |         |              |
| V3SVHSHC_7236959  | C16orf97     |  |  | 2.043E-03 |           |  |  |  |         |              |
| V3SVHSHC_7812215  | Carkd        |  |  | 2.052E-03 |           |  |  |  |         |              |
| V3SVHSHC_8492873  | COCH         |  |  | 2.120E-03 | 4.476E-03 |  |  |  |         |              |
| V3SVHSHC_10396973 | SYVN1        |  |  | 2.146E-03 | 3.218E-01 |  |  |  |         |              |
| V3SVHSHC_6817397  | GLCCI1       |  |  | 2.344E-03 |           |  |  |  |         |              |
| V3SVHSHC_6525875  | ARL2         |  |  | 2.344E-03 |           |  |  |  |         |              |
| V3SVHSHC_8767466  | FAM177A1     |  |  | 2.387E-03 |           |  |  |  |         |              |
| V3SVHSHC_5348534  | LOC101929564 |  |  | 2.392E-03 | 4.059E-01 |  |  |  |         |              |
| V3SVHSHC_8124461  | SLITRK3      |  |  | 2.424E-03 |           |  |  |  |         |              |

|                   |              |  |  |           |           |  |  |  |  |  |
|-------------------|--------------|--|--|-----------|-----------|--|--|--|--|--|
| V3SVHSHC_7942037  | FBXL8        |  |  | 2.530E-03 |           |  |  |  |  |  |
| V3SVHSHC_7636226  | GLDC         |  |  | 2.546E-03 |           |  |  |  |  |  |
| V3SVHSHC_8490464  | SBSN         |  |  | 2.804E-03 |           |  |  |  |  |  |
| V3SVHSHC_6947582  | ACSF3        |  |  | 2.924E-03 |           |  |  |  |  |  |
| V3SVHSHC_5263823  | HP           |  |  | 2.945E-03 |           |  |  |  |  |  |
| V3SVHSHC_8231348  | PLAT         |  |  | 2.967E-03 |           |  |  |  |  |  |
| V3SVHSHC_4710875  | MMP27        |  |  | 3.247E-03 |           |  |  |  |  |  |
| V3SVHSHC_6861947  | lqc5         |  |  | 3.424E-03 |           |  |  |  |  |  |
| V3SVHSHC_6580193  | SYF2         |  |  | 3.528E-03 |           |  |  |  |  |  |
| V3SVHSHC_10518710 | IKZF4        |  |  | 3.571E-03 |           |  |  |  |  |  |
| V3SVHSHC_9092912  | PLEKHG6      |  |  | 3.589E-03 |           |  |  |  |  |  |
| V3SVHSHC_4884851  | OR7A17       |  |  | 3.661E-03 |           |  |  |  |  |  |
| V3SVHSHC_8397206  | MGST3        |  |  | 3.717E-03 |           |  |  |  |  |  |
| V3SVHSHC_6517757  | PTPN7        |  |  | 3.733E-03 |           |  |  |  |  |  |
| V3SVHSHC_8302034  | C19ORF12     |  |  | 3.789E-03 |           |  |  |  |  |  |
| V3SVHSHC_5540033  | CCDC114      |  |  | 3.944E-03 |           |  |  |  |  |  |
| V3SVHSHC_8169044  | SPINK1       |  |  | 3.986E-03 |           |  |  |  |  |  |
| V3SVHSHC_9292232  | LNPEP        |  |  | 4.187E-03 |           |  |  |  |  |  |
| V3SVHSHC_10458650 | SHB          |  |  | 4.228E-03 |           |  |  |  |  |  |
| V3SVHSHC_4862345  | DPY19L2      |  |  | 4.467E-03 |           |  |  |  |  |  |
| V3SVHSHC_4770935  | FOXQ1        |  |  | 4.543E-03 |           |  |  |  |  |  |
| V3SVHSHC_8293058  | ALKBH1       |  |  | 4.671E-03 |           |  |  |  |  |  |
| V3SVHSHC_5169509  | ZFC3H1       |  |  | 5.439E-03 |           |  |  |  |  |  |
| V3SVHSHC_5215973  | EDC4         |  |  | 5.704E-03 |           |  |  |  |  |  |
| V3SVHSHC_10362323 | OR52R1       |  |  | 6.155E-03 |           |  |  |  |  |  |
| V3SVHSHC_5293952  | OR6K2        |  |  | 6.239E-03 |           |  |  |  |  |  |
| V3SVHSHC_8434331  | EHMT2        |  |  | 6.318E-03 |           |  |  |  |  |  |
| V3SVHSHC_4722986  | LOC101060445 |  |  | 6.405E-03 |           |  |  |  |  |  |
| V3SVHSHC_8737337  | VPS37A       |  |  | 6.424E-03 |           |  |  |  |  |  |
| V3SVHSHC_9754529  | REPS2        |  |  | 6.490E-03 |           |  |  |  |  |  |
| V3SVHSHC_6863663  | CT83         |  |  | 6.834E-03 |           |  |  |  |  |  |
| V3SVHSHC_8128784  | PDRG1        |  |  | 7.107E-03 |           |  |  |  |  |  |
| V3SVHSHC_8808584  | KIAA0195     |  |  | 7.108E-03 |           |  |  |  |  |  |
| V3SVHSHC_10820858 | IAH1         |  |  | 7.190E-03 |           |  |  |  |  |  |
| V3SVHSHC_9008960  | GTF2H1       |  |  | 7.253E-03 |           |  |  |  |  |  |
| V3SVHSHC_4757174  | ASUN         |  |  | 7.367E-03 |           |  |  |  |  |  |
| V3SVHSHC_4807895  | HAS2         |  |  | 7.840E-03 |           |  |  |  |  |  |
| V3SVHSHC_8756180  | PMF1         |  |  | 8.121E-03 |           |  |  |  |  |  |
| V3SVHSHC_7440998  | STEAP2       |  |  | 8.604E-03 |           |  |  |  |  |  |
| V3SVHSHC_9400637  | OR5H14       |  |  | 8.853E-03 |           |  |  |  |  |  |
| V3SVHSHC_4681142  | ARL3         |  |  | 8.884E-03 |           |  |  |  |  |  |
| V3SVHSHC_6041501  | ALOX15       |  |  | 8.962E-03 |           |  |  |  |  |  |
| V3SVHSHC_5785355  | C11ORF1      |  |  | 9.066E-03 | 3.476E-01 |  |  |  |  |  |
| V3SVHSHC_5415524  | GTSE1        |  |  | 9.070E-03 |           |  |  |  |  |  |
| V3SVHSHC_5933723  | CCL4L2       |  |  | 9.079E-03 |           |  |  |  |  |  |
| V3SVHSHC_6241019  | KDELR3       |  |  | 9.825E-03 |           |  |  |  |  |  |
| V3SVHSHC_5854556  | WBSCR28      |  |  | 1.001E-02 |           |  |  |  |  |  |
| V3SVHSHC_10211612 | HSPA4L       |  |  | 1.034E-02 |           |  |  |  |  |  |
| V3SVHSHC_6450965  | ZRANB2       |  |  | 1.088E-02 |           |  |  |  |  |  |
| V3SVHSHC_7986719  | GNB8         |  |  | 1.099E-02 |           |  |  |  |  |  |
| V3SVHSHC_5915276  | SLC29A1      |  |  | 1.126E-02 |           |  |  |  |  |  |
| V3SVHSHC_5870429  | NIT1         |  |  | 1.139E-02 |           |  |  |  |  |  |
| V3SVHSHC_10848413 | PATL2        |  |  | 1.145E-02 |           |  |  |  |  |  |
| V3SVHSHC_10510988 | KCNA7        |  |  | 1.166E-02 |           |  |  |  |  |  |
| V3SVHSHC_7266758  | SLC45A3      |  |  | 1.175E-02 |           |  |  |  |  |  |

|                   |              |  |  |           |           |  |  |  |  |       |
|-------------------|--------------|--|--|-----------|-----------|--|--|--|--|-------|
| V3SVHSHC_8286095  | CD164        |  |  | 1.205E-02 |           |  |  |  |  |       |
| V3SVHSHC_5130107  | CES4A        |  |  | 1.245E-02 |           |  |  |  |  |       |
| V3SVHSHC_4683584  | POLR2A       |  |  | 1.248E-02 |           |  |  |  |  |       |
| V3SVHSHC_5455124  | FGF10        |  |  | 1.286E-02 |           |  |  |  |  |       |
| V3SVHSHC_9959030  | UBQLN3       |  |  | 1.289E-02 |           |  |  |  |  |       |
| V3SVHSHC_5841950  | DUSP12       |  |  | 1.336E-02 |           |  |  |  |  |       |
| V3SVHSHC_5773013  | PARP12       |  |  | 1.400E-02 |           |  |  |  |  |       |
| V3SVHSHC_5164427  | NNAT         |  |  | 1.424E-02 |           |  |  |  |  |       |
| V3SVHSHC_8444726  | TOM1L2       |  |  | 1.477E-02 |           |  |  |  |  |       |
| V3SVHSHC_5696915  | TAAR9        |  |  | 1.491E-02 | 4.226E-07 |  |  |  |  | TAAR9 |
| V3SVHSHC_9234845  | PPM1E        |  |  | 1.507E-02 | 4.741E-01 |  |  |  |  |       |
| V3SVHSHC_8816735  | OR5AC2       |  |  | 1.512E-02 |           |  |  |  |  |       |
| V3SVHSHC_5035826  | PTGER3       |  |  | 1.513E-02 |           |  |  |  |  |       |
| V3SVHSHC_10483499 | ZNF592       |  |  | 1.538E-02 |           |  |  |  |  |       |
| V3SVHSHC_5768657  | WBSCR28      |  |  | 1.564E-02 |           |  |  |  |  |       |
| V3SVHSHC_9678695  | CYP4F3       |  |  | 1.627E-02 |           |  |  |  |  |       |
| V3SVHSHC_10089446 | LFNG         |  |  | 1.663E-02 |           |  |  |  |  |       |
| V3SVHSHC_10387172 | DTX4         |  |  | 1.703E-02 |           |  |  |  |  |       |
| V3SVHSHC_7348994  | PIIB         |  |  | 1.733E-02 |           |  |  |  |  |       |
| V3SVHSHC_5031305  | ZNF98        |  |  | 1.748E-02 |           |  |  |  |  |       |
| V3SVHSHC_9303980  | BAG6         |  |  | 1.775E-02 |           |  |  |  |  |       |
| V3SVHSHC_8103440  | PDE2A        |  |  | 1.853E-02 |           |  |  |  |  |       |
| V3SVHSHC_5146310  | IFLTD1       |  |  | 1.934E-02 |           |  |  |  |  |       |
| V3SVHSHC_5080574  | CLDN3        |  |  | 1.956E-02 |           |  |  |  |  |       |
| V3SVHSHC_6174722  | CCDC176      |  |  | 1.970E-02 |           |  |  |  |  |       |
| V3SVHSHC_6600290  | RNF208       |  |  | 2.060E-02 |           |  |  |  |  |       |
| V3SVHSHC_5393282  | BTN3A2       |  |  | 2.072E-02 |           |  |  |  |  |       |
| V3SVHSHC_10548773 | C20orf196    |  |  | 2.072E-02 |           |  |  |  |  |       |
| V3SVHSHC_9118982  | ATF7IP2      |  |  | 2.113E-02 |           |  |  |  |  |       |
| V3SVHSHC_9640712  | GJC3         |  |  | 2.130E-02 |           |  |  |  |  |       |
| V3SVHSHC_4930094  | MZT1         |  |  | 2.155E-02 |           |  |  |  |  |       |
| V3SVHSHC_8654969  | TMEM261      |  |  | 2.192E-02 |           |  |  |  |  |       |
| V3SVHSHC_9002327  | C8orf76      |  |  | 2.245E-02 |           |  |  |  |  |       |
| V3SVHSHC_6680645  | OR4D1        |  |  | 2.253E-02 |           |  |  |  |  |       |
| V3SVHSHC_7008764  | LOC100133128 |  |  | 2.254E-02 |           |  |  |  |  |       |
| V3SVHSHC_8782217  | PRPF40B      |  |  | 2.337E-02 |           |  |  |  |  |       |
| V3SVHSHC_7785848  | ABCC1        |  |  | 2.398E-02 |           |  |  |  |  |       |
| V3SVHSHC_9647510  | UGT3A2       |  |  | 2.481E-02 |           |  |  |  |  |       |
| V3SVHSHC_7866236  | GKAP1        |  |  | 2.579E-02 |           |  |  |  |  |       |
| V3SVHSHC_5372360  | RNF6         |  |  | 2.589E-02 |           |  |  |  |  |       |
| V3SVHSHC_5897621  | TUBB         |  |  | 2.691E-02 |           |  |  |  |  |       |
| V3SVHSHC_10764131 | ZNF560       |  |  | 2.814E-02 |           |  |  |  |  |       |
| V3SVHSHC_9278867  | GOLGA6D      |  |  | 2.839E-02 |           |  |  |  |  |       |
| V3SVHSHC_6681569  | TMCC3        |  |  | 2.875E-02 |           |  |  |  |  |       |
| V3SVHSHC_5667479  | PITPNM3      |  |  | 2.911E-02 |           |  |  |  |  |       |
| V3SVHSHC_7710542  | CFHR2        |  |  | 2.954E-02 |           |  |  |  |  |       |
| V3SVHSHC_9593159  | FGD5         |  |  | 2.967E-02 |           |  |  |  |  |       |
| V3SVHSHC_5232308  | HOXC6        |  |  | 3.000E-02 |           |  |  |  |  |       |
| V3SVHSHC_7190231  | CAPZA2       |  |  | 3.027E-02 |           |  |  |  |  |       |
| V3SVHSHC_10260881 | AGO3         |  |  | 3.067E-02 |           |  |  |  |  |       |
| V3SVHSHC_10837688 | SLC16A14     |  |  | 3.096E-02 |           |  |  |  |  |       |
| V3SVHSHC_6303950  | CD320        |  |  | 3.144E-02 |           |  |  |  |  |       |
| V3SVHSHC_5190596  | ALCAM        |  |  | 3.158E-02 |           |  |  |  |  |       |
| V3SVHSHC_7757699  | TMTC2        |  |  | 3.268E-02 |           |  |  |  |  |       |
| V3SVHSHC_7791623  | ATF7IP       |  |  | 3.268E-02 |           |  |  |  |  |       |

|                   |              |  |  |           |           |  |  |  |  |        |
|-------------------|--------------|--|--|-----------|-----------|--|--|--|--|--------|
| V3SVHSHC_9775088  | SERTAD2      |  |  | 3.349E-02 |           |  |  |  |  |        |
| V3SVHSHC_6248741  | SLC39A4      |  |  | 3.391E-02 |           |  |  |  |  |        |
| V3SVHSHC_8722883  | HMGNI        |  |  | 3.544E-02 |           |  |  |  |  |        |
| V3SVHSHC_5256365  | PIK3AP1      |  |  | 3.548E-02 |           |  |  |  |  |        |
| V3SVHSHC_8034140  | ALDH7A1      |  |  | 3.549E-02 |           |  |  |  |  |        |
| V3SVHSHC_5686190  | ZNF677       |  |  | 3.566E-02 |           |  |  |  |  |        |
| V3SVHSHC_10631042 | FMO1         |  |  | 3.591E-02 |           |  |  |  |  |        |
| V3SVHSHC_8947085  | SOCS1        |  |  | 3.634E-02 |           |  |  |  |  |        |
| V3SVHSHC_9426212  | CALML5       |  |  | 3.646E-02 | 7.369E-21 |  |  |  |  | CALML5 |
| V3SVHSHC_4976162  | PAK3         |  |  | 3.902E-02 |           |  |  |  |  |        |
| V3SVHSHC_10145348 | HOXB8        |  |  | 3.946E-02 |           |  |  |  |  |        |
| V3SVHSHC_4877228  | LEO1         |  |  | 4.057E-02 |           |  |  |  |  |        |
| V3SVHSHC_5668535  | GABARAPL1    |  |  | 4.221E-02 |           |  |  |  |  |        |
| V3SVHSHC_7174193  | TTC5         |  |  | 4.286E-02 |           |  |  |  |  |        |
| V3SVHSHC_7667378  | LOC101929183 |  |  | 4.484E-02 |           |  |  |  |  |        |
| V3SVHSHC_10808219 | SMN2         |  |  | 4.534E-02 | 3.725E-16 |  |  |  |  | SMN2   |
| V3SVHSHC_7690643  | BRD3         |  |  | 4.557E-02 |           |  |  |  |  |        |
| V3SVHSHC_9392882  | Col6a5       |  |  | 4.593E-02 |           |  |  |  |  |        |
| V3SVHSHC_10588835 | KRBOX4       |  |  | 4.654E-02 |           |  |  |  |  |        |
| V3SVHSHC_10275731 | HPR          |  |  | 5.154E-02 |           |  |  |  |  |        |
| V3SVHSHC_10319291 | LOC285095    |  |  | 5.351E-02 |           |  |  |  |  |        |
| V3SVHSHC_8240522  | PARD6G       |  |  | 5.385E-02 |           |  |  |  |  |        |
| V3SVHSHC_6502346  | FAM160A1     |  |  | 5.559E-02 |           |  |  |  |  |        |
| V3SVHSHC_9961604  | CHCHD6       |  |  | 5.614E-02 |           |  |  |  |  |        |
| V3SVHSHC_7691072  | ALX3         |  |  | 5.807E-02 |           |  |  |  |  |        |
| V3SVHSHC_8171090  | CENPE        |  |  | 6.412E-02 |           |  |  |  |  |        |
| V3SVHSHC_9973550  | RAD51        |  |  | 6.428E-02 |           |  |  |  |  |        |
| V3SVHSHC_10084727 | TRAF3        |  |  | 6.465E-02 |           |  |  |  |  |        |
| V3SVHSHC_7591016  | LIPI         |  |  | 6.668E-02 |           |  |  |  |  |        |
| V3SVHSHC_5063942  | FGFR1        |  |  | 6.726E-02 |           |  |  |  |  |        |
| V3SVHSHC_8784197  | SLC5A6       |  |  | 6.796E-02 |           |  |  |  |  |        |
| V3SVHSHC_10001237 | TM2D3        |  |  | 7.097E-02 |           |  |  |  |  |        |
| V3SVHSHC_9144161  | YIPF5        |  |  | 7.255E-02 |           |  |  |  |  |        |
| V3SVHSHC_8495711  | GIMAP1       |  |  | 7.383E-02 |           |  |  |  |  |        |
| V3SVHSHC_8033348  | PNLDC1       |  |  | 7.417E-02 |           |  |  |  |  |        |
| V3SVHSHC_7136606  | EDDM3A       |  |  | 7.926E-02 |           |  |  |  |  |        |
| V3SVHSHC_4997777  | POLR1A       |  |  | 8.046E-02 |           |  |  |  |  |        |
| V3SVHSHC_7914119  | FAM185A      |  |  | 8.245E-02 |           |  |  |  |  |        |
| V3SVHSHC_9908573  | GAGE2D       |  |  | 8.267E-02 |           |  |  |  |  |        |
| V3SVHSHC_7951343  | ZCCHC7       |  |  | 8.330E-02 |           |  |  |  |  |        |
| V3SVHSHC_8693084  | NARG2        |  |  | 8.337E-02 |           |  |  |  |  |        |
| V3SVHSHC_8469839  | Ak4          |  |  | 8.379E-02 |           |  |  |  |  |        |
| V3SVHSHC_8432318  | JSRP1        |  |  | 8.465E-02 |           |  |  |  |  |        |
| V3SVHSHC_10083935 | DYNC1H1      |  |  | 8.794E-02 |           |  |  |  |  |        |
| V3SVHSHC_9099248  | GSTO2        |  |  | 8.896E-02 |           |  |  |  |  |        |
| V3SVHSHC_8830661  | FBXW5        |  |  | 8.922E-02 | 9.913E-22 |  |  |  |  | FBXW5  |
| V3SVHSHC_6157562  | DHCR7        |  |  | 9.175E-02 |           |  |  |  |  |        |
| V3SVHSHC_9858941  | ERVV-1       |  |  | 9.257E-02 |           |  |  |  |  |        |
| V3SVHSHC_10227452 | ACTG2        |  |  | 9.578E-02 |           |  |  |  |  |        |
| V3SVHSHC_8379518  | LAMB1        |  |  | 9.723E-02 |           |  |  |  |  |        |
| V3SVHSHC_8715656  | PABPC3       |  |  | 9.971E-02 |           |  |  |  |  |        |
| V3SVHSHC_7219172  | METTL23      |  |  | 1.015E-01 |           |  |  |  |  |        |
| V3SVHSHC_9802841  | KLF7         |  |  | 1.023E-01 |           |  |  |  |  |        |
| V3SVHSHC_5346686  | CACNB3       |  |  | 1.035E-01 |           |  |  |  |  |        |
| V3SVHSHC_6345959  | LDB2         |  |  | 1.036E-01 |           |  |  |  |  |        |

|                   |              |  |  |           |           |  |  |  |  |  |
|-------------------|--------------|--|--|-----------|-----------|--|--|--|--|--|
| V3SVHSHC_7827560  | CENPE        |  |  | 1.043E-01 |           |  |  |  |  |  |
| V3SVHSHC_5675861  | UBB          |  |  | 1.078E-01 | 1.842E-02 |  |  |  |  |  |
| V3SVHSHC_6068462  | CENPE        |  |  | 1.097E-01 |           |  |  |  |  |  |
| V3SVHSHC_9812675  | OR4F16       |  |  | 1.137E-01 |           |  |  |  |  |  |
| V3SVHSHC_7766609  | FAM214A      |  |  | 1.142E-01 |           |  |  |  |  |  |
| V3SVHSHC_4639133  | IL21R        |  |  | 1.151E-01 |           |  |  |  |  |  |
| V3SVHSHC_8757467  | VEZT         |  |  | 1.167E-01 |           |  |  |  |  |  |
| V3SVHSHC_6574649  | GAPDH        |  |  | 1.204E-01 |           |  |  |  |  |  |
| V3SVHSHC_10312361 | Zdbf2        |  |  | 1.215E-01 |           |  |  |  |  |  |
| V3SVHSHC_10419677 | GIMAP7       |  |  | 1.215E-01 |           |  |  |  |  |  |
| V3SVHSHC_4705727  | SHPK         |  |  | 1.260E-01 |           |  |  |  |  |  |
| V3SVHSHC_7542506  | C16orf46     |  |  | 1.266E-01 |           |  |  |  |  |  |
| V3SVHSHC_5367047  | RC3H2        |  |  | 1.266E-01 |           |  |  |  |  |  |
| V3SVHSHC_7486439  | FGFR1        |  |  | 1.305E-01 |           |  |  |  |  |  |
| V3SVHSHC_5693483  | SLC35G6      |  |  | 1.324E-01 |           |  |  |  |  |  |
| V3SVHSHC_5933162  | RAE1         |  |  | 1.340E-01 |           |  |  |  |  |  |
| V3SVHSHC_5376650  | PSMD6        |  |  | 1.343E-01 |           |  |  |  |  |  |
| V3SVHSHC_7099382  | ACTB         |  |  | 1.366E-01 |           |  |  |  |  |  |
| V3SVHSHC_6802580  | RNF219       |  |  | 1.392E-01 |           |  |  |  |  |  |
| V3SVHSHC_5502149  | HNRNPA1L2    |  |  | 1.395E-01 |           |  |  |  |  |  |
| V3SVHSHC_5380577  | HHIPL2       |  |  | 1.402E-01 |           |  |  |  |  |  |
| V3SVHSHC_9967181  | URB1         |  |  | 1.413E-01 | 2.419E-01 |  |  |  |  |  |
| V3SVHSHC_6508913  | CENPE        |  |  | 1.476E-01 |           |  |  |  |  |  |
| V3SVHSHC_6694175  | LAMB1        |  |  | 1.511E-01 |           |  |  |  |  |  |
| V3SVHSHC_9938174  | PDE8B        |  |  | 1.511E-01 |           |  |  |  |  |  |
| V3SVHSHC_9899234  | NDUFB8       |  |  | 1.521E-01 |           |  |  |  |  |  |
| V3SVHSHC_7264712  | H3F3B        |  |  | 1.537E-01 |           |  |  |  |  |  |
| V3SVHSHC_6833963  | C7orf71      |  |  | 1.554E-01 |           |  |  |  |  |  |
| V3SVHSHC_5566763  | GDPD1        |  |  | 1.583E-01 |           |  |  |  |  |  |
| V3SVHSHC_8309987  | YAP1         |  |  | 1.696E-01 |           |  |  |  |  |  |
| V3SVHSHC_4757867  | GALM         |  |  | 1.723E-01 |           |  |  |  |  |  |
| V3SVHSHC_8243228  | TTC8         |  |  | 1.781E-01 |           |  |  |  |  |  |
| V3SVHSHC_9928901  | POLR2B       |  |  | 1.796E-01 |           |  |  |  |  |  |
| V3SVHSHC_7045295  | OR2D2        |  |  | 1.821E-01 |           |  |  |  |  |  |
| V3SVHSHC_7291541  | FANCD2       |  |  | 1.824E-01 |           |  |  |  |  |  |
| V3SVHSHC_5721533  | C9orf153     |  |  | 1.832E-01 |           |  |  |  |  |  |
| V3SVHSHC_5937452  | CDHR1        |  |  | 1.837E-01 |           |  |  |  |  |  |
| V3SVHSHC_9837524  | LOC101930233 |  |  | 1.844E-01 |           |  |  |  |  |  |
| V3SVHSHC_5480039  | ZNF630       |  |  | 1.855E-01 |           |  |  |  |  |  |
| V3SVHSHC_8563658  | INO80D       |  |  | 1.924E-01 |           |  |  |  |  |  |
| V3SVHSHC_4855712  | PUF60        |  |  | 1.927E-01 |           |  |  |  |  |  |
| V3SVHSHC_7135913  | Eif6         |  |  | 1.928E-01 |           |  |  |  |  |  |
| V3SVHSHC_7438490  | MAT2A        |  |  | 1.942E-01 |           |  |  |  |  |  |
| V3SVHSHC_9192341  | PLK1         |  |  | 1.943E-01 |           |  |  |  |  |  |
| V3SVHSHC_9513695  | DNAJA3       |  |  | 1.979E-01 |           |  |  |  |  |  |
| V3SVHSHC_5116940  | PHOSPHO1     |  |  | 2.019E-01 |           |  |  |  |  |  |
| V3SVHSHC_9606920  | MRGPRX4      |  |  | 2.051E-01 |           |  |  |  |  |  |
| V3SVHSHC_7845083  | DSCR3        |  |  | 2.146E-01 |           |  |  |  |  |  |
| V3SVHSHC_7315433  | C9ORF116     |  |  | 2.183E-01 |           |  |  |  |  |  |
| V3SVHSHC_6260423  | MUC3B        |  |  | 2.185E-01 |           |  |  |  |  |  |
| V3SVHSHC_5582867  | ARID1B       |  |  | 2.189E-01 |           |  |  |  |  |  |
| V3SVHSHC_9395621  | LOR          |  |  | 2.265E-01 |           |  |  |  |  |  |
| V3SVHSHC_5761694  | MAOB         |  |  | 2.273E-01 |           |  |  |  |  |  |
| V3SVHSHC_6219800  | EPT1         |  |  | 2.284E-01 |           |  |  |  |  |  |
| V3SVHSHC_9932366  | VSTM5        |  |  | 2.352E-01 |           |  |  |  |  |  |

|                   |              |  |  |           |           |  |  |  |  |         |
|-------------------|--------------|--|--|-----------|-----------|--|--|--|--|---------|
| V3SVHSHC_5886764  | POLR2B       |  |  | 2.361E-01 |           |  |  |  |  |         |
| V3SVHSHC_8800103  | CENPE        |  |  | 2.414E-01 |           |  |  |  |  |         |
| V3SVHSHC_7523927  | NRD1         |  |  | 2.481E-01 |           |  |  |  |  |         |
| V3SVHSHC_9823334  | COPB2        |  |  | 2.487E-01 |           |  |  |  |  |         |
| V3SVHSHC_10091228 | LOC100996646 |  |  | 2.524E-01 |           |  |  |  |  |         |
| V3SVHSHC_8012228  | KLRC2        |  |  | 2.576E-01 |           |  |  |  |  |         |
| V3SVHSHC_7963025  | NIP7         |  |  | 2.679E-01 |           |  |  |  |  |         |
| V3SVHSHC_10340345 | EIF2S2       |  |  | 2.689E-01 |           |  |  |  |  |         |
| V3SVHSHC_6350777  | EXT1         |  |  | 2.697E-01 |           |  |  |  |  |         |
| V3SVHSHC_4877723  | LOC285500    |  |  | 2.830E-01 |           |  |  |  |  |         |
| V3SVHSHC_5824394  | NAA30        |  |  | 2.858E-01 |           |  |  |  |  |         |
| V3SVHSHC_6250391  | PRMT2        |  |  | 2.862E-01 |           |  |  |  |  |         |
| V3SVHSHC_9038198  | IMP4         |  |  | 2.864E-01 |           |  |  |  |  |         |
| V3SVHSHC_8269529  | GDPD3        |  |  | 2.890E-01 |           |  |  |  |  |         |
| V3SVHSHC_8129279  | PRSS50       |  |  | 2.911E-01 |           |  |  |  |  |         |
| V3SVHSHC_10141421 | PPP1R14A     |  |  | 2.959E-01 |           |  |  |  |  |         |
| V3SVHSHC_7115849  | YEATS4       |  |  | 3.059E-01 |           |  |  |  |  |         |
| V3SVHSHC_8268209  | PLAGL1       |  |  | 3.092E-01 |           |  |  |  |  |         |
| V3SVHSHC_6393809  | N4BP1        |  |  | 3.111E-01 |           |  |  |  |  |         |
| V3SVHSHC_5342924  | PCDH11X      |  |  | 3.154E-01 |           |  |  |  |  |         |
| V3SVHSHC_9756476  | COL14A1      |  |  | 3.276E-01 | 2.682E-13 |  |  |  |  | COL14A1 |
| V3SVHSHC_8507030  | INTS1        |  |  | 3.303E-01 |           |  |  |  |  |         |
| V3SVHSHC_5032592  | ZNF569       |  |  | 3.398E-01 |           |  |  |  |  |         |
| V3SVHSHC_7795748  | RFESD        |  |  | 3.399E-01 |           |  |  |  |  |         |
| V3SVHSHC_7468619  | SLC10A6      |  |  | 3.415E-01 |           |  |  |  |  |         |
| V3SVHSHC_6096050  | SNRPF        |  |  | 3.422E-01 |           |  |  |  |  |         |
| V3SVHSHC_9400934  | FCHSD2       |  |  | 3.473E-01 |           |  |  |  |  |         |
| V3SVHSHC_9505808  | H3F3B        |  |  | 3.515E-01 |           |  |  |  |  |         |
| V3SVHSHC_7106015  | PPFIA4       |  |  | 3.548E-01 |           |  |  |  |  |         |
| V3SVHSHC_7962794  | NIP7         |  |  | 3.570E-01 |           |  |  |  |  |         |
| V3SVHSHC_6221582  | YAP1         |  |  | 3.571E-01 |           |  |  |  |  |         |
| V3SVHSHC_10406939 | NIP7         |  |  | 3.653E-01 |           |  |  |  |  |         |
| V3SVHSHC_5148488  | SNRPF        |  |  | 3.682E-01 |           |  |  |  |  |         |
| V3SVHSHC_10786637 | GPBP1        |  |  | 3.687E-01 |           |  |  |  |  |         |
| V3SVHSHC_5169344  | HES1         |  |  | 3.776E-01 |           |  |  |  |  |         |
| V3SVHSHC_5915573  | DHTKD1       |  |  | 3.832E-01 |           |  |  |  |  |         |
| V3SVHSHC_9477197  | MMS19        |  |  | 3.859E-01 | 5.994E-08 |  |  |  |  | MMS19   |
| V3SVHSHC_10006946 | PPAN         |  |  | 3.909E-01 |           |  |  |  |  |         |
| V3SVHSHC_9959789  | SNRPF        |  |  | 4.001E-01 |           |  |  |  |  |         |
| V3SVHSHC_6170168  | OXSM         |  |  | 4.052E-01 |           |  |  |  |  |         |
| V3SVHSHC_9651206  | PPAN         |  |  | 4.161E-01 |           |  |  |  |  |         |
| V3SVHSHC_9017606  | PPAN         |  |  | 4.294E-01 |           |  |  |  |  |         |
| V3SVHSHC_8632925  | TCEAL2       |  |  | 4.372E-01 |           |  |  |  |  |         |
| V3SVHSHC_8346980  | NANOS2       |  |  | 4.387E-01 |           |  |  |  |  |         |
| V3SVHSHC_8861318  | POLR1A       |  |  | 4.481E-01 | 2.350E-01 |  |  |  |  |         |
| V3SVHSHC_4877822  | FLOT2        |  |  | 4.485E-01 |           |  |  |  |  |         |
| V3SVHSHC_7730408  | FAM73B       |  |  | 4.503E-01 |           |  |  |  |  |         |
| V3SVHSHC_7275404  | OR2L5        |  |  | 4.655E-01 |           |  |  |  |  |         |
| V3SVHSHC_7376582  | HNRNPF       |  |  | 4.667E-01 |           |  |  |  |  |         |
| V3SVHSHC_8076611  | NT5DC3       |  |  | 4.668E-01 |           |  |  |  |  |         |
| V3SVHSHC_8916692  | AKAP9        |  |  | 4.762E-01 |           |  |  |  |  |         |
| V3SVHSHC_7655894  | LOC100129924 |  |  | 4.835E-01 |           |  |  |  |  |         |
| V3SVHSHC_8663120  | MFN1         |  |  | 4.837E-01 |           |  |  |  |  |         |
| V3SVHSHC_9560885  | APOA1BP      |  |  |           | 6.502E-80 |  |  |  |  | APOA1BP |
| V3SVHSHC_8232635  | PLEKHS1      |  |  |           | 9.624E-50 |  |  |  |  | PLEKHS1 |

|                   |              |  |  |  |           |  |  |  |  |              |
|-------------------|--------------|--|--|--|-----------|--|--|--|--|--------------|
| V3SVHSHC_9565274  | APOC2        |  |  |  | 5.846E-46 |  |  |  |  | APOC2        |
| V3SVHSHC_7262864  | LYPD1        |  |  |  | 7.749E-46 |  |  |  |  | LYPD1        |
| V3SVHSHC_9597944  | AGAP5        |  |  |  | 8.344E-45 |  |  |  |  | AGAP5        |
| V3SVHSHC_10717238 | CDH17        |  |  |  | 3.832E-43 |  |  |  |  | CDH17        |
| V3SVHSHC_9891512  | Ms4a15       |  |  |  | 1.906E-39 |  |  |  |  | Ms4a15       |
| V3SVHSHC_7003055  | LOC101930154 |  |  |  | 9.225E-39 |  |  |  |  | LOC101930154 |
| V3SVHSHC_6551813  | WBSCR27      |  |  |  | 6.763E-38 |  |  |  |  | WBSCR27      |
| V3SVHSHC_4789877  | TRIM16L      |  |  |  | 1.716E-37 |  |  |  |  | TRIM16L      |
| V3SVHSHC_4659296  | LOC101060022 |  |  |  | 5.580E-37 |  |  |  |  | LOC101060022 |
| V3SVHSHC_10015526 | CBX6         |  |  |  | 2.066E-36 |  |  |  |  | CBX6         |
| V3SVHSHC_7382423  | SPATA31A7    |  |  |  | 1.898E-35 |  |  |  |  | SPATA31A7    |
| V3SVHSHC_8604281  | UHMK1        |  |  |  | 2.632E-35 |  |  |  |  | UHMK1        |
| V3SVHSHC_5686586  | CALML6       |  |  |  | 3.027E-34 |  |  |  |  | CALML6       |
| V3SVHSHC_7751462  | RTCB         |  |  |  | 6.138E-33 |  |  |  |  | RTCB         |
| V3SVHSHC_9223724  | AKR1C3       |  |  |  | 1.880E-31 |  |  |  |  | AKR1C3       |
| V3SVHSHC_9297941  | GP9          |  |  |  | 1.362E-30 |  |  |  |  | GP9          |
| V3SVHSHC_7239236  | NBPF6        |  |  |  | 2.830E-30 |  |  |  |  | NBPF6        |
| V3SVHSHC_6965996  | RSPO2        |  |  |  | 3.983E-30 |  |  |  |  | RSPO2        |
| V3SVHSHC_4965173  | EGLN3        |  |  |  | 8.702E-30 |  |  |  |  | EGLN3        |
| V3SVHSHC_6881384  | PRRC1        |  |  |  | 1.527E-29 |  |  |  |  | PRRC1        |
| V3SVHSHC_8047670  | ATF7IP2      |  |  |  | 1.850E-29 |  |  |  |  | ATF7IP2      |
| V3SVHSHC_5776181  | ARNT2        |  |  |  | 2.792E-29 |  |  |  |  | ARNT2        |
| V3SVHSHC_9047966  | ZNF582       |  |  |  | 3.752E-29 |  |  |  |  | ZNF582       |
| V3SVHSHC_8859503  | U2AF1L4      |  |  |  | 6.382E-29 |  |  |  |  | U2AF1L4      |
| V3SVHSHC_8577815  | C19orf35     |  |  |  | 6.617E-29 |  |  |  |  | C19orf35     |
| V3SVHSHC_4935605  | OAZ2         |  |  |  | 8.139E-29 |  |  |  |  | OAZ2         |
| V3SVHSHC_6761858  | HEPHL1       |  |  |  | 1.228E-28 |  |  |  |  | HEPHL1       |
| V3SVHSHC_9793865  | SH2D1A       |  |  |  | 1.232E-28 |  |  |  |  | SH2D1A       |
| V3SVHSHC_9233426  | PTDSS1       |  |  |  | 2.107E-28 |  |  |  |  | PTDSS1       |
| V3SVHSHC_8774330  | TNPO2        |  |  |  | 2.571E-28 |  |  |  |  | TNPO2        |
| V3SVHSHC_8583491  | RPA4         |  |  |  | 3.502E-28 |  |  |  |  | RPA4         |
| V3SVHSHC_10359122 | RNASEK       |  |  |  | 4.600E-28 |  |  |  |  | RNASEK       |
| V3SVHSHC_7287548  | CD79B        |  |  |  | 6.275E-28 |  |  |  |  | CD79B        |
| V3SVHSHC_9351665  | AMIGO2       |  |  |  | 7.829E-28 |  |  |  |  | AMIGO2       |
| V3SVHSHC_6049289  | TREX1        |  |  |  | 1.789E-27 |  |  |  |  | TREX1        |
| V3SVHSHC_7133537  | OR6C6        |  |  |  | 2.384E-27 |  |  |  |  | OR6C6        |
| V3SVHSHC_5786411  | ALDH1A3      |  |  |  | 3.468E-27 |  |  |  |  | ALDH1A3      |
| V3SVHSHC_8700707  | FAM101A      |  |  |  | 4.975E-27 |  |  |  |  | FAM101A      |
| V3SVHSHC_6665861  | FAM43B       |  |  |  | 5.725E-27 |  |  |  |  | FAM43B       |
| V3SVHSHC_7779875  | SLC22A6      |  |  |  | 8.637E-27 |  |  |  |  | SLC22A6      |
| V3SVHSHC_4938674  | QTRT1        |  |  |  | 9.405E-27 |  |  |  |  | QTRT1        |
| V3SVHSHC_10084463 | AHDC1        |  |  |  | 1.006E-26 |  |  |  |  | AHDC1        |
| V3SVHSHC_7511090  | RAB29        |  |  |  | 1.081E-26 |  |  |  |  | RAB29        |
| V3SVHSHC_9204617  | Akip1        |  |  |  | 1.283E-26 |  |  |  |  | Akip1        |
| V3SVHSHC_8764562  | NOG          |  |  |  | 1.352E-26 |  |  |  |  | NOG          |
| V3SVHSHC_10147922 | HGS          |  |  |  | 1.353E-26 |  |  |  |  | HGS          |
| V3SVHSHC_9619559  | KIAA0226L    |  |  |  | 1.415E-26 |  |  |  |  | KIAA0226L    |
| V3SVHSHC_8047571  | MGMT         |  |  |  | 1.893E-26 |  |  |  |  | MGMT         |
| V3SVHSHC_9601772  | HOXB4        |  |  |  | 3.394E-26 |  |  |  |  | HOXB4        |
| V3SVHSHC_7359422  | AP3M2        |  |  |  | 3.572E-26 |  |  |  |  | AP3M2        |
| V3SVHSHC_10789508 | USP9Y        |  |  |  | 4.062E-26 |  |  |  |  | USP9Y        |
| V3SVHSHC_8598737  | CAPS         |  |  |  | 4.555E-26 |  |  |  |  | CAPS         |



|                   |               |  |  |  |           |  |  |  |  |               |
|-------------------|---------------|--|--|--|-----------|--|--|--|--|---------------|
| V3SVHSHC_7683218  | CCL3L1        |  |  |  | 4.717E-26 |  |  |  |  | CCL3L1        |
| V3SVHSHC_5894552  | DUSP3         |  |  |  | 4.797E-26 |  |  |  |  | DUSP3         |
| V3SVHSHC_6413378  | DEFB131       |  |  |  | 5.016E-26 |  |  |  |  | DEFB131       |
| V3SVHSHC_8350907  | SPINK5        |  |  |  | 5.113E-26 |  |  |  |  | SPINK5        |
| V3SVHSHC_8749679  | LOC101927594  |  |  |  | 6.122E-26 |  |  |  |  | LOC101927594  |
| V3SVHSHC_9112151  | SF3A2         |  |  |  | 6.285E-26 |  |  |  |  | SF3A2         |
| V3SVHSHC_8950418  | RNASE6        |  |  |  | 6.782E-26 |  |  |  |  | RNASE6        |
| V3SVHSHC_9772580  | SYNJ2BP-COX16 |  |  |  | 7.153E-26 |  |  |  |  | SYNJ2BP-COX16 |
| V3SVHSHC_8272697  | WNT5A         |  |  |  | 7.461E-26 |  |  |  |  | WNT5A         |
| V3SVHSHC_8092781  | ANKRD60       |  |  |  | 9.452E-26 |  |  |  |  | ANKRD60       |
| V3SVHSHC_6919136  | INHA          |  |  |  | 1.180E-25 |  |  |  |  | INHA          |
| V3SVHSHC_9811058  | BNC2          |  |  |  | 1.764E-25 |  |  |  |  | BNC2          |
| V3SVHSHC_4711997  | PATL1         |  |  |  | 2.986E-25 |  |  |  |  | PATL1         |
| V3SVHSHC_9644936  | ADHFE1        |  |  |  | 3.349E-25 |  |  |  |  | ADHFE1        |
| V3SVHSHC_7827164  | RGL2          |  |  |  | 6.319E-25 |  |  |  |  | RGL2          |
| V3SVHSHC_5346653  | DFNA5         |  |  |  | 7.468E-25 |  |  |  |  | DFNA5         |
| V3SVHSHC_10638038 | PTBP1         |  |  |  | 7.565E-25 |  |  |  |  | PTBP1         |
| V3SVHSHC_6704603  | SPIN2B        |  |  |  | 8.197E-25 |  |  |  |  | SPIN2B        |
| V3SVHSHC_7948637  | GOLGA1        |  |  |  | 1.155E-24 |  |  |  |  | GOLGA1        |
| V3SVHSHC_10591310 | RNF213        |  |  |  | 1.653E-24 |  |  |  |  | RNF213        |
| V3SVHSHC_7003880  | CLDN15        |  |  |  | 2.185E-24 |  |  |  |  | CLDN15        |
| V3SVHSHC_6471788  | EEA1          |  |  |  | 2.913E-24 |  |  |  |  | EEA1          |
| V3SVHSHC_5770538  | FAM19A5       |  |  |  | 3.290E-24 |  |  |  |  | FAM19A5       |
| V3SVHSHC_9448322  | CARD14        |  |  |  | 3.698E-24 |  |  |  |  | CARD14        |
| V3SVHSHC_5500862  | A2ML1         |  |  |  | 4.016E-24 |  |  |  |  | A2ML1         |
| V3SVHSHC_8202176  | KCNK2         |  |  |  | 4.135E-24 |  |  |  |  | KCNK2         |
| V3SVHSHC_5369819  | ESPNL         |  |  |  | 4.700E-24 |  |  |  |  | ESPNL         |
| V3SVHSHC_7952168  | STK32A        |  |  |  | 4.990E-24 |  |  |  |  | STK32A        |
| V3SVHSHC_7217522  | ELL2          |  |  |  | 5.540E-24 |  |  |  |  | ELL2          |
| V3SVHSHC_10542338 | C1QTNF6       |  |  |  | 5.809E-24 |  |  |  |  | C1QTNF6       |
| V3SVHSHC_10673348 | CYBA          |  |  |  | 7.990E-24 |  |  |  |  | CYBA          |
| V3SVHSHC_6120239  | PRADC1        |  |  |  | 9.713E-24 |  |  |  |  | PRADC1        |
| V3SVHSHC_5308637  | ADAMTS10      |  |  |  | 1.100E-23 |  |  |  |  | ADAMTS10      |
| V3SVHSHC_10413044 | OLFML1        |  |  |  | 1.155E-23 |  |  |  |  | OLFML1        |
| V3SVHSHC_6059783  | B4GALT5       |  |  |  | 1.209E-23 |  |  |  |  | B4GALT5       |
| V3SVHSHC_9465944  | MRPS18C       |  |  |  | 1.336E-23 |  |  |  |  | MRPS18C       |
| V3SVHSHC_9908837  | VPS26A        |  |  |  | 1.802E-23 |  |  |  |  | VPS26A        |
| V3SVHSHC_8480003  | TMEM183B      |  |  |  | 1.842E-23 |  |  |  |  | TMEM183B      |
| V3SVHSHC_5389916  | ZBTB14        |  |  |  | 2.169E-23 |  |  |  |  | ZBTB14        |
| V3SVHSHC_8875046  | GNPNAT1       |  |  |  | 2.275E-23 |  |  |  |  | GNPNAT1       |
| V3SVHSHC_7523432  | KIAA0319L     |  |  |  | 2.275E-23 |  |  |  |  | KIAA0319L     |
| V3SVHSHC_8439413  | TTC7B         |  |  |  | 2.277E-23 |  |  |  |  | TTC7B         |
| V3SVHSHC_6833138  | HYAL4         |  |  |  | 2.390E-23 |  |  |  |  | HYAL4         |
| V3SVHSHC_7956887  | GSTO1         |  |  |  | 3.170E-23 |  |  |  |  | GSTO1         |
| V3SVHSHC_9093011  | HOXB2         |  |  |  | 3.402E-23 |  |  |  |  | HOXB2         |
| V3SVHSHC_6635897  | CARD9         |  |  |  | 4.799E-23 |  |  |  |  | CARD9         |
| V3SVHSHC_5980220  | C19ORF18      |  |  |  | 4.993E-23 |  |  |  |  | C19ORF18      |
| V3SVHSHC_9019883  | PAPL          |  |  |  | 5.193E-23 |  |  |  |  | PAPL          |
| V3SVHSHC_7102616  | NUDT7         |  |  |  | 5.341E-23 |  |  |  |  | NUDT7         |
| V3SVHSHC_8718329  | IGJ           |  |  |  | 5.356E-23 |  |  |  |  | IGJ           |

|                   |              |  |  |  |           |  |  |  |  |              |
|-------------------|--------------|--|--|--|-----------|--|--|--|--|--------------|
| V3SVHSHC_5827199  | ABHD12       |  |  |  | 5.361E-23 |  |  |  |  | ABHD12       |
| V3SVHSHC_9051530  | Hspa13       |  |  |  | 5.614E-23 |  |  |  |  | Hspa13       |
| V3SVHSHC_7636919  | ROCK2        |  |  |  | 6.902E-23 |  |  |  |  | ROCK2        |
| V3SVHSHC_10232666 | AVPR2        |  |  |  | 9.243E-23 |  |  |  |  | AVPR2        |
| V3SVHSHC_4832150  | GLT1D1       |  |  |  | 1.201E-22 |  |  |  |  | GLT1D1       |
| V3SVHSHC_7112681  | MYO3A        |  |  |  | 1.227E-22 |  |  |  |  | MYO3A        |
| V3SVHSHC_8481059  | KLF2         |  |  |  | 1.432E-22 |  |  |  |  | KLF2         |
| V3SVHSHC_9039287  | PTGES3       |  |  |  | 2.578E-22 |  |  |  |  | PTGES3       |
| V3SVHSHC_9994505  | CACNB2       |  |  |  | 3.384E-22 |  |  |  |  | CACNB2       |
| V3SVHSHC_5490467  | SNX4         |  |  |  | 4.118E-22 |  |  |  |  | SNX4         |
| V3SVHSHC_8265173  | VWA5B2       |  |  |  | 4.722E-22 |  |  |  |  | VWA5B2       |
| V3SVHSHC_9638237  | C16orf96     |  |  |  | 5.215E-22 |  |  |  |  | C16orf96     |
| V3SVHSHC_5243231  | LOXL1        |  |  |  | 5.351E-22 |  |  |  |  | LOXL1        |
| V3SVHSHC_9299426  | ALG6         |  |  |  | 6.601E-22 |  |  |  |  | ALG6         |
| V3SVHSHC_7421000  | CA13         |  |  |  | 6.998E-22 |  |  |  |  | CA13         |
| V3SVHSHC_5039885  | MFAP3        |  |  |  | 7.169E-22 |  |  |  |  | MFAP3        |
| V3SVHSHC_9889268  | CLCN6        |  |  |  | 9.451E-22 |  |  |  |  | CLCN6        |
| V3SVHSHC_10747862 | KDELC2       |  |  |  | 1.092E-21 |  |  |  |  | KDELC2       |
| V3SVHSHC_6728825  | KLHDC2       |  |  |  | 1.359E-21 |  |  |  |  | KLHDC2       |
| V3SVHSHC_5330846  | CYP1A1       |  |  |  | 1.470E-21 |  |  |  |  | CYP1A1       |
| V3SVHSHC_10423637 | PTPLAD1      |  |  |  | 1.527E-21 |  |  |  |  | PTPLAD1      |
| V3SVHSHC_7763177  | MRPL27       |  |  |  | 1.845E-21 |  |  |  |  | MRPL27       |
| V3SVHSHC_10174058 | SLC39A13     |  |  |  | 1.928E-21 |  |  |  |  | SLC39A13     |
| V3SVHSHC_6498650  | RET          |  |  |  | 2.011E-21 |  |  |  |  | RET          |
| V3SVHSHC_6441560  | MS4A13       |  |  |  | 2.267E-21 |  |  |  |  | MS4A13       |
| V3SVHSHC_8985728  | PHKA1        |  |  |  | 2.444E-21 |  |  |  |  | PHKA1        |
| V3SVHSHC_10034666 | ATP5O        |  |  |  | 2.666E-21 |  |  |  |  | ATP5O        |
| V3SVHSHC_10482509 | C1GALT1      |  |  |  | 2.714E-21 |  |  |  |  | C1GALT1      |
| V3SVHSHC_8999225  | ITGB7        |  |  |  | 2.759E-21 |  |  |  |  | ITGB7        |
| V3SVHSHC_8280617  | MRPS36       |  |  |  | 2.797E-21 |  |  |  |  | MRPS36       |
| V3SVHSHC_5046254  | MVP          |  |  |  | 3.151E-21 |  |  |  |  | MVP          |
| V3SVHSHC_8822576  | DHCR24       |  |  |  | 3.539E-21 |  |  |  |  | DHCR24       |
| V3SVHSHC_9292331  | STK33        |  |  |  | 4.026E-21 |  |  |  |  | STK33        |
| V3SVHSHC_6926264  | CPO          |  |  |  | 4.795E-21 |  |  |  |  | CPO          |
| V3SVHSHC_5415722  | CARNS1       |  |  |  | 5.120E-21 |  |  |  |  | CARNS1       |
| V3SVHSHC_6731960  | OR4L1        |  |  |  | 5.317E-21 |  |  |  |  | OR4L1        |
| V3SVHSHC_6875906  | FAM49B       |  |  |  | 5.570E-21 |  |  |  |  | FAM49B       |
| V3SVHSHC_7652627  | PCDHA3       |  |  |  | 6.505E-21 |  |  |  |  | PCDHA3       |
| V3SVHSHC_5494856  | BEX1         |  |  |  | 6.572E-21 |  |  |  |  | BEX1         |
| V3SVHSHC_7928837  | LOC100996415 |  |  |  | 7.004E-21 |  |  |  |  | LOC100996415 |
| V3SVHSHC_9275534  | OLFM4        |  |  |  | 7.024E-21 |  |  |  |  | OLFM4        |
| V3SVHSHC_10508777 | TBX19        |  |  |  | 7.416E-21 |  |  |  |  | TBX19        |
| V3SVHSHC_7064402  | NCS1         |  |  |  | 1.189E-20 |  |  |  |  | NCS1         |
| V3SVHSHC_8160431  | TMEM41B      |  |  |  | 1.223E-20 |  |  |  |  | TMEM41B      |
| V3SVHSHC_8927846  | IFNA2        |  |  |  | 1.266E-20 |  |  |  |  | IFNA2        |
| V3SVHSHC_8345891  | B3GALT1      |  |  |  | 1.392E-20 |  |  |  |  | B3GALT1      |
| V3SVHSHC_8072255  | PGK2         |  |  |  | 1.619E-20 |  |  |  |  | PGK2         |
| V3SVHSHC_5994476  | CHL1         |  |  |  | 1.671E-20 |  |  |  |  | CHL1         |
| V3SVHSHC_10171814 | S100Z        |  |  |  | 1.887E-20 |  |  |  |  | S100Z        |
| V3SVHSHC_10623452 | CHD6         |  |  |  | 1.891E-20 |  |  |  |  | CHD6         |
| V3SVHSHC_5156408  | BAMBI        |  |  |  | 1.926E-20 |  |  |  |  | BAMBI        |
| V3SVHSHC_6961871  | FYN          |  |  |  | 2.016E-20 |  |  |  |  | FYN          |
| V3SVHSHC_5514854  | UNK          |  |  |  | 2.087E-20 |  |  |  |  | UNK          |
| V3SVHSHC_9515477  | HYI          |  |  |  | 2.092E-20 |  |  |  |  | HYI          |

|                   |              |  |  |  |           |  |  |  |  |              |
|-------------------|--------------|--|--|--|-----------|--|--|--|--|--------------|
| V3SVHSHC_5248841  | RASAL3       |  |  |  | 2.134E-20 |  |  |  |  | RASAL3       |
| V3SVHSHC_9540029  | CALCRL       |  |  |  | 2.263E-20 |  |  |  |  | CALCRL       |
| V3SVHSHC_6294182  | LOC100129361 |  |  |  | 2.319E-20 |  |  |  |  | LOC100129361 |
| V3SVHSHC_5764928  | MYEOV        |  |  |  | 2.392E-20 |  |  |  |  | MYEOV        |
| V3SVHSHC_7435388  | HOMER1       |  |  |  | 2.654E-20 |  |  |  |  | HOMER1       |
| V3SVHSHC_6394172  | LOC100996350 |  |  |  | 2.739E-20 |  |  |  |  | LOC100996350 |
| V3SVHSHC_6131624  | ZNF521       |  |  |  | 2.921E-20 |  |  |  |  | ZNF521       |
| V3SVHSHC_7944809  | CSMD1        |  |  |  | 3.441E-20 |  |  |  |  | CSMD1        |
| V3SVHSHC_7812908  | AKT1S1       |  |  |  | 3.610E-20 |  |  |  |  | AKT1S1       |
| V3SVHSHC_7359620  | TSTD3        |  |  |  | 3.674E-20 |  |  |  |  | TSTD3        |
| V3SVHSHC_10436705 | APOA5        |  |  |  | 3.844E-20 |  |  |  |  | APOA5        |
| V3SVHSHC_9170561  | SLC22A9      |  |  |  | 4.755E-20 |  |  |  |  | SLC22A9      |
| V3SVHSHC_5648471  | MARC2        |  |  |  | 4.791E-20 |  |  |  |  | MARC2        |
| V3SVHSHC_8009456  | P4HA1        |  |  |  | 4.944E-20 |  |  |  |  | P4HA1        |
| V3SVHSHC_5916398  | MTA2         |  |  |  | 4.971E-20 |  |  |  |  | MTA2         |
| V3SVHSHC_6567785  | SORCS3       |  |  |  | 5.016E-20 |  |  |  |  | SORCS3       |
| V3SVHSHC_7495316  | FAM120A      |  |  |  | 5.171E-20 |  |  |  |  | FAM120A      |
| V3SVHSHC_6655070  | OR2T1        |  |  |  | 5.608E-20 |  |  |  |  | OR2T1        |
| V3SVHSHC_10646519 | THSD7A       |  |  |  | 6.618E-20 |  |  |  |  | THSD7A       |
| V3SVHSHC_9009026  | SCRN3        |  |  |  | 7.079E-20 |  |  |  |  | SCRN3        |
| V3SVHSHC_8024174  | UNC13D       |  |  |  | 7.429E-20 |  |  |  |  | UNC13D       |
| V3SVHSHC_6596198  | LYPLA2       |  |  |  | 7.614E-20 |  |  |  |  | LYPLA2       |
| V3SVHSHC_9836237  | S100A1       |  |  |  | 7.842E-20 |  |  |  |  | S100A1       |
| V3SVHSHC_7404038  | NAA35        |  |  |  | 8.319E-20 |  |  |  |  | NAA35        |
| V3SVHSHC_9982394  | LYVE1        |  |  |  | 1.030E-19 |  |  |  |  | LYVE1        |
| V3SVHSHC_5675630  | GPR162       |  |  |  | 1.043E-19 |  |  |  |  | GPR162       |
| V3SVHSHC_9130301  | OR5M9        |  |  |  | 1.101E-19 |  |  |  |  | OR5M9        |
| V3SVHSHC_7926560  | ATP6V1F      |  |  |  | 1.133E-19 |  |  |  |  | ATP6V1F      |
| V3SVHSHC_5190827  | RGCC         |  |  |  | 1.134E-19 |  |  |  |  | RGCC         |
| V3SVHSHC_6568049  | ANKRD62      |  |  |  | 1.863E-19 |  |  |  |  | ANKRD62      |
| V3SVHSHC_8472611  | DHRS7C       |  |  |  | 1.939E-19 |  |  |  |  | DHRS7C       |
| V3SVHSHC_8103638  | FFAR4        |  |  |  | 1.960E-19 |  |  |  |  | FFAR4        |
| V3SVHSHC_9918011  | TULP4        |  |  |  | 2.168E-19 |  |  |  |  | TULP4        |
| V3SVHSHC_7238510  | ZNF444       |  |  |  | 2.233E-19 |  |  |  |  | ZNF444       |
| V3SVHSHC_8873429  | CEACAM4      |  |  |  | 2.257E-19 |  |  |  |  | CEACAM4      |
| V3SVHSHC_6132515  | DCT          |  |  |  | 2.277E-19 |  |  |  |  | DCT          |
| V3SVHSHC_9568475  | Tomm20l      |  |  |  | 2.280E-19 |  |  |  |  | Tomm20l      |
| V3SVHSHC_9391628  | Agfg2        |  |  |  | 2.291E-19 |  |  |  |  | Agfg2        |
| V3SVHSHC_9584249  | MED1         |  |  |  | 2.339E-19 |  |  |  |  | MED1         |
| V3SVHSHC_10148879 | TSPAN7       |  |  |  | 2.371E-19 |  |  |  |  | TSPAN7       |
| V3SVHSHC_6427964  | DUSP21       |  |  |  | 2.451E-19 |  |  |  |  | DUSP21       |
| V3SVHSHC_9962198  | LRRC61       |  |  |  | 2.459E-19 |  |  |  |  | LRRC61       |
| V3SVHSHC_5614745  | TTBK1        |  |  |  | 2.489E-19 |  |  |  |  | TTBK1        |
| V3SVHSHC_9153137  | HSFY1        |  |  |  | 2.550E-19 |  |  |  |  | HSFY1        |
| V3SVHSHC_7560854  | HJURP        |  |  |  | 2.806E-19 |  |  |  |  | HJURP        |
| V3SVHSHC_8723675  | PSME4        |  |  |  | 3.208E-19 |  |  |  |  | PSME4        |
| V3SVHSHC_5010317  | OSM          |  |  |  | 3.266E-19 |  |  |  |  | OSM          |
| V3SVHSHC_6964511  | IL12RB2      |  |  |  | 3.270E-19 |  |  |  |  | IL12RB2      |
| V3SVHSHC_7669193  | RAB34        |  |  |  | 3.422E-19 |  |  |  |  | RAB34        |
| V3SVHSHC_8034965  | LY9          |  |  |  | 3.711E-19 |  |  |  |  | LY9          |
| V3SVHSHC_6728594  | VDR          |  |  |  | 3.935E-19 |  |  |  |  | VDR          |
| V3SVHSHC_5587850  | OSTM1        |  |  |  | 4.421E-19 |  |  |  |  | OSTM1        |
| V3SVHSHC_9316685  | C16orf93     |  |  |  | 4.604E-19 |  |  |  |  | C16orf93     |

|                   |              |  |  |  |           |  |  |  |  |              |
|-------------------|--------------|--|--|--|-----------|--|--|--|--|--------------|
| V3SVHSHC_10537157 | SDK1         |  |  |  | 4.940E-19 |  |  |  |  | SDK1         |
| V3SVHSHC_5961839  | ZNF578       |  |  |  | 5.966E-19 |  |  |  |  | ZNF578       |
| V3SVHSHC_6434168  | DMC1         |  |  |  | 6.102E-19 |  |  |  |  | DMC1         |
| V3SVHSHC_9963650  | PSAT1        |  |  |  | 6.109E-19 |  |  |  |  | PSAT1        |
| V3SVHSHC_8991536  | ANKRD1       |  |  |  | 6.417E-19 |  |  |  |  | ANKRD1       |
| V3SVHSHC_8038826  | Fam131c      |  |  |  | 6.704E-19 |  |  |  |  | Fam131c      |
| V3SVHSHC_5265803  | ALDH6A1      |  |  |  | 6.893E-19 |  |  |  |  | ALDH6A1      |
| V3SVHSHC_9837722  | HYAL1        |  |  |  | 6.927E-19 |  |  |  |  | HYAL1        |
| V3SVHSHC_9411131  | DEFB103A     |  |  |  | 6.957E-19 |  |  |  |  | DEFB103A     |
| V3SVHSHC_10313120 | C14orf177    |  |  |  | 7.299E-19 |  |  |  |  | C14orf177    |
| V3SVHSHC_8733278  | CNTF         |  |  |  | 7.453E-19 |  |  |  |  | CNTF         |
| V3SVHSHC_5945174  | DCP1B        |  |  |  | 7.697E-19 |  |  |  |  | DCP1B        |
| V3SVHSHC_9854387  | TMEM184C     |  |  |  | 8.119E-19 |  |  |  |  | TMEM184C     |
| V3SVHSHC_5852015  | CERCAM       |  |  |  | 8.249E-19 |  |  |  |  | CERCAM       |
| V3SVHSHC_6632267  | EGLN2        |  |  |  | 8.499E-19 |  |  |  |  | EGLN2        |
| V3SVHSHC_4767008  | ZDHHC9       |  |  |  | 9.055E-19 |  |  |  |  | ZDHHC9       |
| V3SVHSHC_8350841  | LOC101929804 |  |  |  | 9.276E-19 |  |  |  |  | LOC101929804 |
| V3SVHSHC_9266690  | WFIKN2       |  |  |  | 1.007E-18 |  |  |  |  | WFIKN2       |
| V3SVHSHC_5965403  | GRINA        |  |  |  | 1.046E-18 |  |  |  |  | GRINA        |
| V3SVHSHC_5386649  | SLC5A4       |  |  |  | 1.098E-18 |  |  |  |  | SLC5A4       |
| V3SVHSHC_7152116  | UNK          |  |  |  | 1.111E-18 |  |  |  |  | UNK          |
| V3SVHSHC_6942830  | PLEKHA1      |  |  |  | 1.372E-18 |  |  |  |  | PLEKHA1      |
| V3SVHSHC_9468551  | CSNK2A1      |  |  |  | 1.386E-18 |  |  |  |  | CSNK2A1      |
| V3SVHSHC_7543892  | LOC100505549 |  |  |  | 1.430E-18 |  |  |  |  | LOC100505549 |
| V3SVHSHC_7982594  | CYR61        |  |  |  | 1.510E-18 |  |  |  |  | CYR61        |
| V3SVHSHC_10770995 | MUC5B        |  |  |  | 1.613E-18 |  |  |  |  | MUC5B        |
| V3SVHSHC_9216002  | PTCH1        |  |  |  | 1.670E-18 |  |  |  |  | PTCH1        |
| V3SVHSHC_7072817  | MPHOSPH9     |  |  |  | 1.766E-18 |  |  |  |  | MPHOSPH9     |
| V3SVHSHC_10040276 | USP12        |  |  |  | 1.850E-18 |  |  |  |  | USP12        |
| V3SVHSHC_9852407  | WDTC1        |  |  |  | 1.875E-18 |  |  |  |  | WDTC1        |
| V3SVHSHC_9892700  | KAZN         |  |  |  | 1.965E-18 |  |  |  |  | KAZN         |
| V3SVHSHC_6723281  | C15orf32     |  |  |  | 1.975E-18 |  |  |  |  | C15orf32     |
| V3SVHSHC_5666489  | OR5K1        |  |  |  | 2.011E-18 |  |  |  |  | OR5K1        |
| V3SVHSHC_5832578  | SLC26A11     |  |  |  | 2.054E-18 |  |  |  |  | SLC26A11     |
| V3SVHSHC_5535545  | ASAH2B       |  |  |  | 2.065E-18 |  |  |  |  | ASAH2B       |
| V3SVHSHC_9306158  | ANGPT4       |  |  |  | 2.148E-18 |  |  |  |  | ANGPT4       |
| V3SVHSHC_10720967 | RNF145       |  |  |  | 2.204E-18 |  |  |  |  | RNF145       |
| V3SVHSHC_8953685  | TEX11        |  |  |  | 2.372E-18 |  |  |  |  | TEX11        |
| V3SVHSHC_8848679  | LDHB         |  |  |  | 2.518E-18 |  |  |  |  | LDHB         |
| V3SVHSHC_6096083  | CD9          |  |  |  | 2.699E-18 |  |  |  |  | CD9          |
| V3SVHSHC_10136438 | CLDN18       |  |  |  | 3.383E-18 |  |  |  |  | CLDN18       |
| V3SVHSHC_4752620  | BFSP1        |  |  |  | 3.582E-18 |  |  |  |  | BFSP1        |
| V3SVHSHC_6926066  | CHRM3        |  |  |  | 3.636E-18 |  |  |  |  | CHRM3        |
| V3SVHSHC_6623489  | STH          |  |  |  | 3.668E-18 |  |  |  |  | STH          |
| V3SVHSHC_6861056  | HCAR3        |  |  |  | 3.673E-18 |  |  |  |  | HCAR3        |
| V3SVHSHC_7386482  | ELAC2        |  |  |  | 3.942E-18 |  |  |  |  | ELAC2        |
| V3SVHSHC_10463105 | LOC100996619 |  |  |  | 3.953E-18 |  |  |  |  | LOC100996619 |
| V3SVHSHC_7531418  | ERGIC2       |  |  |  | 4.279E-18 |  |  |  |  | ERGIC2       |
| V3SVHSHC_9548510  | PTDSS2       |  |  |  | 4.389E-18 |  |  |  |  | PTDSS2       |
| V3SVHSHC_5330153  | GDAP2        |  |  |  | 4.613E-18 |  |  |  |  | GDAP2        |

|                   |          |  |  |  |           |  |  |  |  |          |
|-------------------|----------|--|--|--|-----------|--|--|--|--|----------|
| V3SVHSHC_10667177 | ZBED3    |  |  |  | 4.648E-18 |  |  |  |  | ZBED3    |
| V3SVHSHC_8719451  | BLCAP    |  |  |  | 4.952E-18 |  |  |  |  | BLCAP    |
| V3SVHSHC_7865675  | ETV7     |  |  |  | 5.080E-18 |  |  |  |  | ETV7     |
| V3SVHSHC_9830957  | ATP5SL   |  |  |  | 5.876E-18 |  |  |  |  | ATP5SL   |
| V3SVHSHC_10098950 | CLDND1   |  |  |  | 6.039E-18 |  |  |  |  | CLDND1   |
| V3SVHSHC_10648763 | PITPNA   |  |  |  | 6.465E-18 |  |  |  |  | PITPNA   |
| V3SVHSHC_8352029  | PARL     |  |  |  | 6.488E-18 |  |  |  |  | PARL     |
| V3SVHSHC_8629229  | NIPBL    |  |  |  | 6.636E-18 |  |  |  |  | NIPBL    |
| V3SVHSHC_7698002  | IDH3G    |  |  |  | 7.658E-18 |  |  |  |  | IDH3G    |
| V3SVHSHC_7795583  | RAD23A   |  |  |  | 8.052E-18 |  |  |  |  | RAD23A   |
| V3SVHSHC_10838150 | RRP1     |  |  |  | 8.740E-18 |  |  |  |  | RRP1     |
| V3SVHSHC_8156075  | SRCIN1   |  |  |  | 9.029E-18 |  |  |  |  | SRCIN1   |
| V3SVHSHC_10600517 | SENP2    |  |  |  | 9.853E-18 |  |  |  |  | SENP2    |
| V3SVHSHC_6872144  | RIC8A    |  |  |  | 1.082E-17 |  |  |  |  | RIC8A    |
| V3SVHSHC_8071331  | OGFRL1   |  |  |  | 1.105E-17 |  |  |  |  | OGFRL1   |
| V3SVHSHC_5294447  | UPK3A    |  |  |  | 1.226E-17 |  |  |  |  | UPK3A    |
| V3SVHSHC_7313948  | TOP1MT   |  |  |  | 1.236E-17 |  |  |  |  | TOP1MT   |
| V3SVHSHC_5011373  | CLEC2A   |  |  |  | 1.265E-17 |  |  |  |  | CLEC2A   |
| V3SVHSHC_6738263  | PHF14    |  |  |  | 1.286E-17 |  |  |  |  | PHF14    |
| V3SVHSHC_5843699  | IFNL1    |  |  |  | 1.422E-17 |  |  |  |  | IFNL1    |
| V3SVHSHC_6863630  | ZDHH1    |  |  |  | 1.507E-17 |  |  |  |  | ZDHH1    |
| V3SVHSHC_7645763  | DMC1     |  |  |  | 1.685E-17 |  |  |  |  | DMC1     |
| V3SVHSHC_6145550  | SOX5     |  |  |  | 1.801E-17 |  |  |  |  | SOX5     |
| V3SVHSHC_8807033  | SUN2     |  |  |  | 1.843E-17 |  |  |  |  | SUN2     |
| V3SVHSHC_10170164 | CDCP1    |  |  |  | 1.850E-17 |  |  |  |  | CDCP1    |
| V3SVHSHC_9856664  | CCDC82   |  |  |  | 1.853E-17 |  |  |  |  | CCDC82   |
| V3SVHSHC_6404006  | HLA-DRB4 |  |  |  | 1.923E-17 |  |  |  |  | HLA-DRB4 |
| V3SVHSHC_8706416  | BPI      |  |  |  | 1.987E-17 |  |  |  |  | BPI      |
| V3SVHSHC_5543267  | FADD     |  |  |  | 2.039E-17 |  |  |  |  | FADD     |
| V3SVHSHC_5358929  | HPS6     |  |  |  | 2.124E-17 |  |  |  |  | HPS6     |
| V3SVHSHC_9290318  | C9ORF37  |  |  |  | 2.379E-17 |  |  |  |  | C9ORF37  |
| V3SVHSHC_6678995  | ZNF718   |  |  |  | 2.413E-17 |  |  |  |  | ZNF718   |
| V3SVHSHC_7797893  | CBWD2    |  |  |  | 2.581E-17 |  |  |  |  | CBWD2    |
| V3SVHSHC_8575505  | Fam154b  |  |  |  | 2.668E-17 |  |  |  |  | Fam154b  |
| V3SVHSHC_9234251  | PPP1R14A |  |  |  | 2.743E-17 |  |  |  |  | PPP1R14A |
| V3SVHSHC_4695992  | RAB9A    |  |  |  | 3.035E-17 |  |  |  |  | RAB9A    |
| V3SVHSHC_8712785  | ADH7     |  |  |  | 3.183E-17 |  |  |  |  | ADH7     |
| V3SVHSHC_10597613 | MCOLN1   |  |  |  | 3.255E-17 |  |  |  |  | MCOLN1   |
| V3SVHSHC_8948438  | BAZ1B    |  |  |  | 3.285E-17 |  |  |  |  | BAZ1B    |
| V3SVHSHC_7566398  | STYK1    |  |  |  | 3.324E-17 |  |  |  |  | STYK1    |
| V3SVHSHC_5930159  | Acap3    |  |  |  | 3.405E-17 |  |  |  |  | Acap3    |
| V3SVHSHC_6824459  | Rrp7a    |  |  |  | 3.486E-17 |  |  |  |  | Rrp7a    |
| V3SVHSHC_10531118 | GPR182   |  |  |  | 3.527E-17 |  |  |  |  | GPR182   |
| V3SVHSHC_6453110  | PDSS1    |  |  |  | 3.787E-17 |  |  |  |  | PDSS1    |
| V3SVHSHC_6704867  | C9orf92  |  |  |  | 3.936E-17 |  |  |  |  | C9orf92  |
| V3SVHSHC_8291474  | CACNG7   |  |  |  | 4.219E-17 |  |  |  |  | CACNG7   |
| V3SVHSHC_4733216  | PTN      |  |  |  | 4.226E-17 |  |  |  |  | PTN      |
| V3SVHSHC_9720011  | GALNT1   |  |  |  | 4.648E-17 |  |  |  |  | GALNT1   |
| V3SVHSHC_6570986  | CACHD1   |  |  |  | 4.750E-17 |  |  |  |  | CACHD1   |
| V3SVHSHC_7292630  | AR       |  |  |  | 5.066E-17 |  |  |  |  | AR       |
| V3SVHSHC_4669922  | CNTN3    |  |  |  | 5.115E-17 |  |  |  |  | CNTN3    |
| V3SVHSHC_7345727  | DUSP26   |  |  |  | 5.942E-17 |  |  |  |  | DUSP26   |
| V3SVHSHC_5939465  | Prss58   |  |  |  | 6.421E-17 |  |  |  |  | Prss58   |
| V3SVHSHC_5283623  | GKAP1    |  |  |  | 6.746E-17 |  |  |  |  | GKAP1    |

|                   |           |  |  |  |           |  |  |  |  |           |
|-------------------|-----------|--|--|--|-----------|--|--|--|--|-----------|
| V3SVHSHC_6225773  | RPS4Y2    |  |  |  | 6.953E-17 |  |  |  |  | RPS4Y2    |
| V3SVHSHC_10384928 | ADAMTSL3  |  |  |  | 6.987E-17 |  |  |  |  | ADAMTSL3  |
| V3SVHSHC_6214850  | DNAJB4    |  |  |  | 6.996E-17 |  |  |  |  | DNAJB4    |
| V3SVHSHC_10519898 | CLIC3     |  |  |  | 7.328E-17 |  |  |  |  | CLIC3     |
| V3SVHSHC_7422617  | SLC25A22  |  |  |  | 7.923E-17 |  |  |  |  | SLC25A22  |
| V3SVHSHC_8398691  | COX7A1    |  |  |  | 8.246E-17 |  |  |  |  | COX7A1    |
| V3SVHSHC_5950289  | DZIP1L    |  |  |  | 9.080E-17 |  |  |  |  | DZIP1L    |
| V3SVHSHC_5422883  | FADS3     |  |  |  | 9.354E-17 |  |  |  |  | FADS3     |
| V3SVHSHC_7720409  | TMEM33    |  |  |  | 9.471E-17 |  |  |  |  | TMEM33    |
| V3SVHSHC_6094268  | KRTAP12-4 |  |  |  | 9.949E-17 |  |  |  |  | KRTAP12-4 |
| V3SVHSHC_9573458  | DIS3L     |  |  |  | 1.006E-16 |  |  |  |  | DIS3L     |
| V3SVHSHC_7739978  | LIMA1     |  |  |  | 1.034E-16 |  |  |  |  | LIMA1     |
| V3SVHSHC_7105850  | HDGFRP3   |  |  |  | 1.063E-16 |  |  |  |  | HDGFRP3   |
| V3SVHSHC_8326355  | HMGN2     |  |  |  | 1.064E-16 |  |  |  |  | HMGN2     |
| V3SVHSHC_7886366  | SLC5A4    |  |  |  | 1.096E-16 |  |  |  |  | SLC5A4    |
| V3SVHSHC_6875477  | MYOZ1     |  |  |  | 1.097E-16 |  |  |  |  | MYOZ1     |
| V3SVHSHC_9036845  | DPH1      |  |  |  | 1.100E-16 |  |  |  |  | DPH1      |
| V3SVHSHC_5104466  | LCN2      |  |  |  | 1.160E-16 |  |  |  |  | LCN2      |
| V3SVHSHC_5205512  | SERPINH1  |  |  |  | 1.231E-16 |  |  |  |  | SERPINH1  |
| V3SVHSHC_10202141 | C1orf61   |  |  |  | 1.294E-16 |  |  |  |  | C1orf61   |
| V3SVHSHC_9313319  | ANKH      |  |  |  | 1.357E-16 |  |  |  |  | ANKH      |
| V3SVHSHC_8129840  | RTN4      |  |  |  | 1.399E-16 |  |  |  |  | RTN4      |
| V3SVHSHC_8788817  | NAA60     |  |  |  | 1.524E-16 |  |  |  |  | NAA60     |
| V3SVHSHC_9361928  | F8A1      |  |  |  | 1.653E-16 |  |  |  |  | F8A1      |
| V3SVHSHC_7198052  | ERP44     |  |  |  | 1.661E-16 |  |  |  |  | ERP44     |
| V3SVHSHC_7494260  | PLEKHF1   |  |  |  | 1.722E-16 |  |  |  |  | PLEKHF1   |
| V3SVHSHC_7154426  | FASLG     |  |  |  | 1.836E-16 |  |  |  |  | FASLG     |
| V3SVHSHC_9454955  | HOXA7     |  |  |  | 1.882E-16 |  |  |  |  | HOXA7     |
| V3SVHSHC_10632032 | C1GALT1C1 |  |  |  | 2.195E-16 |  |  |  |  | C1GALT1C1 |
| V3SVHSHC_8248607  | GPR68     |  |  |  | 2.196E-16 |  |  |  |  | GPR68     |
| V3SVHSHC_8033480  | USF2      |  |  |  | 2.282E-16 |  |  |  |  | USF2      |
| V3SVHSHC_9394037  | PKD4      |  |  |  | 2.414E-16 |  |  |  |  | PKD4      |
| V3SVHSHC_9251807  | NT5C1A    |  |  |  | 2.741E-16 |  |  |  |  | NT5C1A    |
| V3SVHSHC_5996489  | COL16A1   |  |  |  | 2.871E-16 |  |  |  |  | COL16A1   |
| V3SVHSHC_7460369  | WIZ       |  |  |  | 2.879E-16 |  |  |  |  | WIZ       |
| V3SVHSHC_8922599  | LHX3      |  |  |  | 2.932E-16 |  |  |  |  | LHX3      |
| V3SVHSHC_5129579  | NUDT1     |  |  |  | 3.105E-16 |  |  |  |  | NUDT1     |
| V3SVHSHC_8633783  | MIER2     |  |  |  | 3.108E-16 |  |  |  |  | MIER2     |
| V3SVHSHC_5539208  | SLC22A23  |  |  |  | 3.507E-16 |  |  |  |  | SLC22A23  |
| V3SVHSHC_8748920  | TDP2      |  |  |  | 3.529E-16 |  |  |  |  | TDP2      |
| V3SVHSHC_10847720 | SMIM9     |  |  |  | 3.783E-16 |  |  |  |  | SMIM9     |
| V3SVHSHC_8388494  | SNUPN     |  |  |  | 3.950E-16 |  |  |  |  | SNUPN     |
| V3SVHSHC_8105585  | OR4P4     |  |  |  | 4.425E-16 |  |  |  |  | OR4P4     |
| V3SVHSHC_4720445  | CPSF4L    |  |  |  | 4.615E-16 |  |  |  |  | CPSF4L    |
| V3SVHSHC_7886399  | MAPKAPK3  |  |  |  | 5.032E-16 |  |  |  |  | MAPKAPK3  |
| V3SVHSHC_10480793 | ZNF576    |  |  |  | 5.223E-16 |  |  |  |  | ZNF576    |
| V3SVHSHC_6953522  | Dlgap5    |  |  |  | 5.425E-16 |  |  |  |  | Dlgap5    |
| V3SVHSHC_9617942  | TARBP2    |  |  |  | 6.110E-16 |  |  |  |  | TARBP2    |
| V3SVHSHC_5250293  | CYP46A1   |  |  |  | 6.847E-16 |  |  |  |  | CYP46A1   |
| V3SVHSHC_7784561  | CXCL14    |  |  |  | 7.709E-16 |  |  |  |  | CXCL14    |
| V3SVHSHC_6795881  | CLEC4G    |  |  |  | 8.912E-16 |  |  |  |  | CLEC4G    |

|                   |              |  |  |  |           |  |  |  |  |              |
|-------------------|--------------|--|--|--|-----------|--|--|--|--|--------------|
| V3SVHSHC_9504224  | RB1CC1       |  |  |  | 9.089E-16 |  |  |  |  | RB1CC1       |
| V3SVHSHC_5074370  | HOXB5        |  |  |  | 9.555E-16 |  |  |  |  | HOXB5        |
| V3SVHSHC_9396908  | PAX7         |  |  |  | 9.831E-16 |  |  |  |  | PAX7         |
| V3SVHSHC_8430338  | CEP250       |  |  |  | 1.043E-15 |  |  |  |  | CEP250       |
| V3SVHSHC_5806640  | SPTY2D1      |  |  |  | 1.083E-15 |  |  |  |  | SPTY2D1      |
| V3SVHSHC_8500166  | SLC15A4      |  |  |  | 1.124E-15 |  |  |  |  | SLC15A4      |
| V3SVHSHC_10586360 | CD6          |  |  |  | 1.340E-15 |  |  |  |  | CD6          |
| V3SVHSHC_7533629  | FGF9         |  |  |  | 1.347E-15 |  |  |  |  | FGF9         |
| V3SVHSHC_8103374  | COL24A1      |  |  |  | 1.359E-15 |  |  |  |  | COL24A1      |
| V3SVHSHC_10715324 | MTDH         |  |  |  | 1.385E-15 |  |  |  |  | MTDH         |
| V3SVHSHC_8334638  | XKR3         |  |  |  | 1.418E-15 |  |  |  |  | XKR3         |
| V3SVHSHC_6441032  | CDKL5        |  |  |  | 1.545E-15 |  |  |  |  | CDKL5        |
| V3SVHSHC_9000380  | Stx1b        |  |  |  | 1.564E-15 |  |  |  |  | Stx1b        |
| V3SVHSHC_7770371  | ARPC3        |  |  |  | 1.751E-15 |  |  |  |  | ARPC3        |
| V3SVHSHC_5991440  | GJC3         |  |  |  | 1.923E-15 |  |  |  |  | GJC3         |
| V3SVHSHC_4832678  | PLS3         |  |  |  | 1.932E-15 |  |  |  |  | PLS3         |
| V3SVHSHC_10389878 | VEGFC        |  |  |  | 2.078E-15 |  |  |  |  | VEGFC        |
| V3SVHSHC_7306523  | TBX2         |  |  |  | 2.123E-15 |  |  |  |  | TBX2         |
| V3SVHSHC_10793402 | TUFM         |  |  |  | 2.126E-15 |  |  |  |  | TUFM         |
| V3SVHSHC_8986388  | FAM160B2     |  |  |  | 2.138E-15 |  |  |  |  | FAM160B2     |
| V3SVHSHC_6930950  | OR14I1       |  |  |  | 2.482E-15 |  |  |  |  | OR14I1       |
| V3SVHSHC_10443767 | ARFIP1       |  |  |  | 2.639E-15 |  |  |  |  | ARFIP1       |
| V3SVHSHC_5955833  | LOC100996405 |  |  |  | 2.918E-15 |  |  |  |  | LOC100996405 |
| V3SVHSHC_5931347  | KCNA5        |  |  |  | 3.052E-15 |  |  |  |  | KCNA5        |
| V3SVHSHC_5501885  | XYLT2        |  |  |  | 3.069E-15 |  |  |  |  | XYLT2        |
| V3SVHSHC_6242207  | HSD11B1      |  |  |  | 3.346E-15 |  |  |  |  | HSD11B1      |
| V3SVHSHC_7231745  | MCAT         |  |  |  | 3.426E-15 |  |  |  |  | MCAT         |
| V3SVHSHC_10352852 | PHF21A       |  |  |  | 3.851E-15 |  |  |  |  | PHF21A       |
| V3SVHSHC_9460961  | OS9          |  |  |  | 4.336E-15 |  |  |  |  | OS9          |
| V3SVHSHC_10679222 | Lrrc16a      |  |  |  | 4.551E-15 |  |  |  |  | Lrrc16a      |
| V3SVHSHC_10587152 | S1PR2        |  |  |  | 4.733E-15 |  |  |  |  | S1PR2        |
| V3SVHSHC_8190593  | COX16        |  |  |  | 5.276E-15 |  |  |  |  | COX16        |
| V3SVHSHC_6656225  | PHOX2A       |  |  |  | 5.284E-15 |  |  |  |  | PHOX2A       |
| V3SVHSHC_7105619  | EGFL6        |  |  |  | 5.406E-15 |  |  |  |  | EGFL6        |
| V3SVHSHC_9106112  | C10ORF76     |  |  |  | 5.518E-15 |  |  |  |  | C10ORF76     |
| V3SVHSHC_10561610 | HS6ST2       |  |  |  | 5.763E-15 |  |  |  |  | HS6ST2       |
| V3SVHSHC_6554255  | CSF1R        |  |  |  | 5.809E-15 |  |  |  |  | CSF1R        |
| V3SVHSHC_5210594  | COL2A1       |  |  |  | 5.869E-15 |  |  |  |  | COL2A1       |
| V3SVHSHC_7407305  | PPL          |  |  |  | 5.873E-15 |  |  |  |  | PPL          |
| V3SVHSHC_6561251  | LY75-CD302   |  |  |  | 5.898E-15 |  |  |  |  | LY75-CD302   |
| V3SVHSHC_5799413  | RNF141       |  |  |  | 6.337E-15 |  |  |  |  | RNF141       |
| V3SVHSHC_10473104 | MPEG1        |  |  |  | 6.534E-15 |  |  |  |  | MPEG1        |
| V3SVHSHC_8953223  | RHOV         |  |  |  | 6.559E-15 |  |  |  |  | RHOV         |
| V3SVHSHC_5347610  | PDCD2L       |  |  |  | 6.895E-15 |  |  |  |  | PDCD2L       |
| V3SVHSHC_8452448  | GPN3         |  |  |  | 7.023E-15 |  |  |  |  | GPN3         |
| V3SVHSHC_8332163  | OR4M2        |  |  |  | 8.015E-15 |  |  |  |  | OR4M2        |
| V3SVHSHC_6536897  | MYO18B       |  |  |  | 8.079E-15 |  |  |  |  | MYO18B       |
| V3SVHSHC_6871649  | MORC2        |  |  |  | 8.736E-15 |  |  |  |  | MORC2        |
| V3SVHSHC_7871318  | FBXL8        |  |  |  | 9.143E-15 |  |  |  |  | FBXL8        |
| V3SVHSHC_10188413 | FGFR3        |  |  |  | 9.678E-15 |  |  |  |  | FGFR3        |
| V3SVHSHC_10847687 | USP22        |  |  |  | 1.005E-14 |  |  |  |  | USP22        |
| V3SVHSHC_8811587  | ZNF324B      |  |  |  | 1.033E-14 |  |  |  |  | ZNF324B      |

|                   |          |  |  |  |           |  |  |  |  |          |
|-------------------|----------|--|--|--|-----------|--|--|--|--|----------|
| V3SVHSHC_5585309  | LRRC70   |  |  |  | 1.050E-14 |  |  |  |  | LRRC70   |
| V3SVHSHC_8433110  | PCDHB12  |  |  |  | 1.061E-14 |  |  |  |  | PCDHB12  |
| V3SVHSHC_8526170  | FSCN2    |  |  |  | 1.082E-14 |  |  |  |  | FSCN2    |
| V3SVHSHC_6810764  | PDCD4    |  |  |  | 1.092E-14 |  |  |  |  | PDCD4    |
| V3SVHSHC_7618637  | OSBP     |  |  |  | 1.116E-14 |  |  |  |  | OSBP     |
| V3SVHSHC_7327280  | BAZ1A    |  |  |  | 1.193E-14 |  |  |  |  | BAZ1A    |
| V3SVHSHC_10213163 | FBXO9    |  |  |  | 1.247E-14 |  |  |  |  | FBXO9    |
| V3SVHSHC_9086477  | ZNF501   |  |  |  | 1.310E-14 |  |  |  |  | ZNF501   |
| V3SVHSHC_5174624  | HTRA1    |  |  |  | 1.332E-14 |  |  |  |  | HTRA1    |
| V3SVHSHC_7329425  | ZNF208   |  |  |  | 1.438E-14 |  |  |  |  | ZNF208   |
| V3SVHSHC_5201453  | TESK1    |  |  |  | 1.547E-14 |  |  |  |  | TESK1    |
| V3SVHSHC_10475810 | LRRC49   |  |  |  | 1.612E-14 |  |  |  |  | LRRC49   |
| V3SVHSHC_6829673  | AGGF1    |  |  |  | 1.797E-14 |  |  |  |  | AGGF1    |
| V3SVHSHC_7067042  | POLD4    |  |  |  | 1.805E-14 |  |  |  |  | POLD4    |
| V3SVHSHC_6849572  | C16orf72 |  |  |  | 1.883E-14 |  |  |  |  | C16orf72 |
| V3SVHSHC_9751526  | IL6ST    |  |  |  | 1.920E-14 |  |  |  |  | IL6ST    |
| V3SVHSHC_8098226  | PAFAH1B2 |  |  |  | 2.151E-14 |  |  |  |  | PAFAH1B2 |
| V3SVHSHC_5151194  | DNAJC10  |  |  |  | 2.214E-14 |  |  |  |  | DNAJC10  |
| V3SVHSHC_10235174 | DSCAM    |  |  |  | 2.315E-14 |  |  |  |  | DSCAM    |
| V3SVHSHC_7189010  | ATRAID   |  |  |  | 2.475E-14 |  |  |  |  | ATRAID   |
| V3SVHSHC_7754003  | RCE1     |  |  |  | 2.551E-14 |  |  |  |  | RCE1     |
| V3SVHSHC_5189342  | PCBP4    |  |  |  | 3.015E-14 |  |  |  |  | PCBP4    |
| V3SVHSHC_8978666  | CLDN16   |  |  |  | 3.084E-14 |  |  |  |  | CLDN16   |
| V3SVHSHC_4657547  | LSMEM1   |  |  |  | 3.229E-14 |  |  |  |  | LSMEM1   |
| V3SVHSHC_7190264  | SCARB2   |  |  |  | 3.237E-14 |  |  |  |  | SCARB2   |
| V3SVHSHC_8140400  | PLEKHO1  |  |  |  | 3.811E-14 |  |  |  |  | PLEKHO1  |
| V3SVHSHC_9062948  | SAMD10   |  |  |  | 3.821E-14 |  |  |  |  | SAMD10   |
| V3SVHSHC_6255176  | TAX1BP1  |  |  |  | 4.020E-14 |  |  |  |  | TAX1BP1  |
| V3SVHSHC_5556302  | EVA1A    |  |  |  | 4.087E-14 |  |  |  |  | EVA1A    |
| V3SVHSHC_7134461  | NRD1     |  |  |  | 4.112E-14 |  |  |  |  | NRD1     |
| V3SVHSHC_7291145  | SLC31A1  |  |  |  | 4.159E-14 |  |  |  |  | SLC31A1  |
| V3SVHSHC_5494724  | MTFR1    |  |  |  | 4.322E-14 |  |  |  |  | MTFR1    |
| V3SVHSHC_10246262 | ZNF710   |  |  |  | 4.355E-14 |  |  |  |  | ZNF710   |
| V3SVHSHC_5401829  | OGN      |  |  |  | 4.389E-14 |  |  |  |  | OGN      |
| V3SVHSHC_7303850  | UGT2B11  |  |  |  | 4.473E-14 |  |  |  |  | UGT2B11  |
| V3SVHSHC_6716978  | EFCC1    |  |  |  | 4.483E-14 |  |  |  |  | EFCC1    |
| V3SVHSHC_4649132  | PRAMEF6  |  |  |  | 4.561E-14 |  |  |  |  | PRAMEF6  |
| V3SVHSHC_7235045  | ITGB5    |  |  |  | 4.897E-14 |  |  |  |  | ITGB5    |
| V3SVHSHC_10562435 | UPK1A    |  |  |  | 5.026E-14 |  |  |  |  | UPK1A    |
| V3SVHSHC_10676219 | FBLN7    |  |  |  | 5.034E-14 |  |  |  |  | FBLN7    |
| V3SVHSHC_6911876  | MLLT3    |  |  |  | 5.144E-14 |  |  |  |  | MLLT3    |
| V3SVHSHC_8203364  | ZNF513   |  |  |  | 5.327E-14 |  |  |  |  | ZNF513   |
| V3SVHSHC_10553030 | ZNF8     |  |  |  | 5.496E-14 |  |  |  |  | ZNF8     |
| V3SVHSHC_6259466  | CD47     |  |  |  | 6.378E-14 |  |  |  |  | CD47     |
| V3SVHSHC_6389057  | VCPIP1   |  |  |  | 6.964E-14 |  |  |  |  | VCPIP1   |
| V3SVHSHC_8239103  | HAVCR2   |  |  |  | 7.349E-14 |  |  |  |  | HAVCR2   |
| V3SVHSHC_5410640  | SUMO4    |  |  |  | 7.761E-14 |  |  |  |  | SUMO4    |
| V3SVHSHC_7319030  | EHD3     |  |  |  | 8.086E-14 |  |  |  |  | EHD3     |
| V3SVHSHC_8333120  | MUC5AC   |  |  |  | 9.004E-14 |  |  |  |  | MUC5AC   |
| V3SVHSHC_4865414  | PDHX     |  |  |  | 9.693E-14 |  |  |  |  | PDHX     |
| V3SVHSHC_7485614  | CDC42BPG |  |  |  | 9.753E-14 |  |  |  |  | CDC42BPG |
| V3SVHSHC_6099053  | FHAD1    |  |  |  | 1.014E-13 |  |  |  |  | FHAD1    |
| V3SVHSHC_9373841  | POLD3    |  |  |  | 1.234E-13 |  |  |  |  | POLD3    |



|                   |              |  |  |  |           |  |  |  |  |              |
|-------------------|--------------|--|--|--|-----------|--|--|--|--|--------------|
| V3SVHSHC_6664838  | OR8B2        |  |  |  | 1.341E-13 |  |  |  |  | OR8B2        |
| V3SVHSHC_8705723  | ACOT11       |  |  |  | 1.435E-13 |  |  |  |  | ACOT11       |
| V3SVHSHC_9704171  | TSPAN2       |  |  |  | 1.602E-13 |  |  |  |  | TSPAN2       |
| V3SVHSHC_8109479  | PALM         |  |  |  | 1.708E-13 |  |  |  |  | PALM         |
| V3SVHSHC_9602663  | MB           |  |  |  | 1.780E-13 |  |  |  |  | MB           |
| V3SVHSHC_6839672  | SRCAP        |  |  |  | 1.973E-13 |  |  |  |  | SRCAP        |
| V3SVHSHC_4702229  | ATL2         |  |  |  | 2.011E-13 |  |  |  |  | ATL2         |
| V3SVHSHC_6887720  | POLR2F       |  |  |  | 2.014E-13 |  |  |  |  | POLR2F       |
| V3SVHSHC_8323055  | MLLT4        |  |  |  | 2.213E-13 |  |  |  |  | MLLT4        |
| V3SVHSHC_9189932  | FSTL1        |  |  |  | 2.292E-13 |  |  |  |  | FSTL1        |
| V3SVHSHC_9444494  | UBR7         |  |  |  | 2.631E-13 |  |  |  |  | UBR7         |
| V3SVHSHC_5972762  | KAAG1        |  |  |  | 2.681E-13 |  |  |  |  | KAAG1        |
| V3SVHSHC_7256132  | SLC1A7       |  |  |  | 2.697E-13 |  |  |  |  | SLC1A7       |
| V3SVHSHC_6369059  | ASCC3        |  |  |  | 2.832E-13 |  |  |  |  | ASCC3        |
| V3SVHSHC_6343022  | PCYOX1       |  |  |  | 2.874E-13 |  |  |  |  | PCYOX1       |
| V3SVHSHC_10380638 | BCAT2        |  |  |  | 2.966E-13 |  |  |  |  | BCAT2        |
| V3SVHSHC_5098328  | ZNF623       |  |  |  | 2.992E-13 |  |  |  |  | ZNF623       |
| V3SVHSHC_7049783  | UAP1L1       |  |  |  | 3.212E-13 |  |  |  |  | UAP1L1       |
| V3SVHSHC_10326221 | CYB561       |  |  |  | 3.326E-13 |  |  |  |  | CYB561       |
| V3SVHSHC_9392519  | KLK13        |  |  |  | 3.429E-13 |  |  |  |  | KLK13        |
| V3SVHSHC_9871679  | FUT11        |  |  |  | 3.523E-13 |  |  |  |  | FUT11        |
| V3SVHSHC_7314839  | MTERFD3      |  |  |  | 4.742E-13 |  |  |  |  | MTERFD3      |
| V3SVHSHC_6752651  | ENKD1        |  |  |  | 4.990E-13 |  |  |  |  | ENKD1        |
| V3SVHSHC_6203696  | C3orf27      |  |  |  | 5.072E-13 |  |  |  |  | C3orf27      |
| V3SVHSHC_4648406  | OR5AU1       |  |  |  | 5.126E-13 |  |  |  |  | OR5AU1       |
| V3SVHSHC_5264945  | LOC101928498 |  |  |  | 5.363E-13 |  |  |  |  | LOC101928498 |
| V3SVHSHC_6171323  | NEU2         |  |  |  | 5.554E-13 |  |  |  |  | NEU2         |
| V3SVHSHC_10462907 | MCHR1        |  |  |  | 5.735E-13 |  |  |  |  | MCHR1        |
| V3SVHSHC_5542838  | TMEM114      |  |  |  | 6.365E-13 |  |  |  |  | TMEM114      |
| V3SVHSHC_7134857  | TMTC2        |  |  |  | 6.524E-13 |  |  |  |  | TMTC2        |
| V3SVHSHC_10550588 | ZP2          |  |  |  | 7.370E-13 |  |  |  |  | ZP2          |
| V3SVHSHC_7512872  | TCTEX1D4     |  |  |  | 7.909E-13 |  |  |  |  | TCTEX1D4     |
| V3SVHSHC_7757105  | SLC25A33     |  |  |  | 7.938E-13 |  |  |  |  | SLC25A33     |
| V3SVHSHC_4841654  | LCE5A        |  |  |  | 8.124E-13 |  |  |  |  | LCE5A        |
| V3SVHSHC_6270356  | RPL8         |  |  |  | 8.354E-13 |  |  |  |  | RPL8         |
| V3SVHSHC_6436313  | PTPRG        |  |  |  | 8.368E-13 |  |  |  |  | PTPRG        |
| V3SVHSHC_9946457  | ATF7IP2      |  |  |  | 8.392E-13 |  |  |  |  | ATF7IP2      |
| V3SVHSHC_7440404  | ARSE         |  |  |  | 8.496E-13 |  |  |  |  | ARSE         |
| V3SVHSHC_6703844  | CMTM5        |  |  |  | 8.553E-13 |  |  |  |  | CMTM5        |
| V3SVHSHC_8850923  | TPSG1        |  |  |  | 9.106E-13 |  |  |  |  | TPSG1        |
| V3SVHSHC_10658828 | LOC101060400 |  |  |  | 9.305E-13 |  |  |  |  | LOC101060400 |
| V3SVHSHC_6046715  | CASP16       |  |  |  | 9.453E-13 |  |  |  |  | CASP16       |
| V3SVHSHC_7918970  | SETD9        |  |  |  | 9.517E-13 |  |  |  |  | SETD9        |
| V3SVHSHC_5180069  | ZNF517       |  |  |  | 1.004E-12 |  |  |  |  | ZNF517       |
| V3SVHSHC_6238511  | PCBP3        |  |  |  | 1.036E-12 |  |  |  |  | PCBP3        |
| V3SVHSHC_7841486  | MTIF2        |  |  |  | 1.039E-12 |  |  |  |  | MTIF2        |
| V3SVHSHC_8024405  | GSK3B        |  |  |  | 1.086E-12 |  |  |  |  | GSK3B        |
| V3SVHSHC_7164095  | RASD1        |  |  |  | 1.142E-12 |  |  |  |  | RASD1        |
| V3SVHSHC_10097465 | CAPN12       |  |  |  | 1.167E-12 |  |  |  |  | CAPN12       |
| V3SVHSHC_9590585  | PIANP        |  |  |  | 1.320E-12 |  |  |  |  | PIANP        |
| V3SVHSHC_8181617  | KRTAP13-1    |  |  |  | 1.431E-12 |  |  |  |  | KRTAP13-1    |

|                   |          |  |  |  |           |  |  |  |  |          |
|-------------------|----------|--|--|--|-----------|--|--|--|--|----------|
| V3SVHSHC_6335597  | BIK      |  |  |  | 1.542E-12 |  |  |  |  | BIK      |
| V3SVHSHC_9642329  | ASF1B    |  |  |  | 1.571E-12 |  |  |  |  | ASF1B    |
| V3SVHSHC_9174917  | LRIG3    |  |  |  | 1.635E-12 |  |  |  |  | LRIG3    |
| V3SVHSHC_6028334  | LEFTY1   |  |  |  | 1.779E-12 |  |  |  |  | LEFTY1   |
| V3SVHSHC_4980188  | COPRS    |  |  |  | 1.819E-12 |  |  |  |  | COPRS    |
| V3SVHSHC_5829377  | ASNSD1   |  |  |  | 1.828E-12 |  |  |  |  | ASNSD1   |
| V3SVHSHC_8286623  | EDRF1    |  |  |  | 1.868E-12 |  |  |  |  | EDRF1    |
| V3SVHSHC_5416679  | SLC35E2  |  |  |  | 1.872E-12 |  |  |  |  | SLC35E2  |
| V3SVHSHC_4926068  | ARHGEF11 |  |  |  | 1.930E-12 |  |  |  |  | ARHGEF11 |
| V3SVHSHC_8856434  | C3orf62  |  |  |  | 2.101E-12 |  |  |  |  | C3orf62  |
| V3SVHSHC_7940717  | SMIM11   |  |  |  | 2.269E-12 |  |  |  |  | SMIM11   |
| V3SVHSHC_10391231 | LHFPL5   |  |  |  | 2.284E-12 |  |  |  |  | LHFPL5   |
| V3SVHSHC_10703840 | ARHGEF3  |  |  |  | 2.311E-12 |  |  |  |  | ARHGEF3  |
| V3SVHSHC_6427601  | TMEM175  |  |  |  | 2.321E-12 |  |  |  |  | TMEM175  |
| V3SVHSHC_6936692  | VNN2     |  |  |  | 2.334E-12 |  |  |  |  | VNN2     |
| V3SVHSHC_7794956  | BBIP1    |  |  |  | 2.640E-12 |  |  |  |  | BBIP1    |
| V3SVHSHC_10618172 | ST7      |  |  |  | 2.693E-12 |  |  |  |  | ST7      |
| V3SVHSHC_10025426 | CXCL3    |  |  |  | 2.758E-12 |  |  |  |  | CXCL3    |
| V3SVHSHC_8607647  | LDHAL6A  |  |  |  | 2.941E-12 |  |  |  |  | LDHAL6A  |
| V3SVHSHC_6097766  | PMP2     |  |  |  | 3.481E-12 |  |  |  |  | PMP2     |
| V3SVHSHC_9003218  | PCSK7    |  |  |  | 3.494E-12 |  |  |  |  | PCSK7    |
| V3SVHSHC_7695296  | SNX25    |  |  |  | 3.622E-12 |  |  |  |  | SNX25    |
| V3SVHSHC_10808417 | CAPN3    |  |  |  | 3.855E-12 |  |  |  |  | CAPN3    |
| V3SVHSHC_8708231  | AGXT     |  |  |  | 4.411E-12 |  |  |  |  | AGXT     |
| V3SVHSHC_8101922  | DNMT1    |  |  |  | 4.796E-12 |  |  |  |  | DNMT1    |
| V3SVHSHC_6442979  | ATP6V0E1 |  |  |  | 4.854E-12 |  |  |  |  | ATP6V0E1 |
| V3SVHSHC_9917219  | KCTD17   |  |  |  | 5.654E-12 |  |  |  |  | KCTD17   |
| V3SVHSHC_5889173  | SLC18A3  |  |  |  | 5.863E-12 |  |  |  |  | SLC18A3  |
| V3SVHSHC_6912239  | RNF7     |  |  |  | 5.972E-12 |  |  |  |  | RNF7     |
| V3SVHSHC_5821622  | LRRC43   |  |  |  | 6.763E-12 |  |  |  |  | LRRC43   |
| V3SVHSHC_8225243  | MYO7B    |  |  |  | 7.191E-12 |  |  |  |  | MYO7B    |
| V3SVHSHC_9227849  | DIDO1    |  |  |  | 7.613E-12 |  |  |  |  | DIDO1    |
| V3SVHSHC_7503038  | GLRA2    |  |  |  | 7.679E-12 |  |  |  |  | GLRA2    |
| V3SVHSHC_5379323  | HSPA6    |  |  |  | 7.888E-12 |  |  |  |  | HSPA6    |
| V3SVHSHC_7325069  | SLC9B2   |  |  |  | 8.055E-12 |  |  |  |  | SLC9B2   |
| V3SVHSHC_6124496  | BMPR2    |  |  |  | 9.206E-12 |  |  |  |  | BMPR2    |
| V3SVHSHC_5277749  | BRSK2    |  |  |  | 9.770E-12 |  |  |  |  | BRSK2    |
| V3SVHSHC_8981306  | JAK3     |  |  |  | 9.811E-12 |  |  |  |  | JAK3     |
| V3SVHSHC_9995528  | PLXNA2   |  |  |  | 9.944E-12 |  |  |  |  | PLXNA2   |
| V3SVHSHC_8284082  | SCAP     |  |  |  | 1.068E-11 |  |  |  |  | SCAP     |
| V3SVHSHC_5113838  | CLPB     |  |  |  | 1.129E-11 |  |  |  |  | CLPB     |
| V3SVHSHC_5608805  | Zcchc18  |  |  |  | 1.229E-11 |  |  |  |  | Zcchc18  |
| V3SVHSHC_6271016  | CSNK1G1  |  |  |  | 1.251E-11 |  |  |  |  | CSNK1G1  |
| V3SVHSHC_5564618  | HERC5    |  |  |  | 1.255E-11 |  |  |  |  | HERC5    |
| V3SVHSHC_7060871  | MAGEA10  |  |  |  | 1.318E-11 |  |  |  |  | MAGEA10  |
| V3SVHSHC_10267844 | FOXJ3    |  |  |  | 1.379E-11 |  |  |  |  | FOXJ3    |
| V3SVHSHC_4809512  | ZMIZ2    |  |  |  | 1.485E-11 |  |  |  |  | ZMIZ2    |
| V3SVHSHC_10240982 | CCDC68   |  |  |  | 1.563E-11 |  |  |  |  | CCDC68   |
| V3SVHSHC_9608570  | PRPH2    |  |  |  | 1.704E-11 |  |  |  |  | PRPH2    |
| V3SVHSHC_6464462  | SHC4     |  |  |  | 1.889E-11 |  |  |  |  | SHC4     |
| V3SVHSHC_9302000  | ZNF891   |  |  |  | 2.043E-11 |  |  |  |  | ZNF891   |
| V3SVHSHC_6104762  | BAGE3    |  |  |  | 2.047E-11 |  |  |  |  | BAGE3    |
| V3SVHSHC_5359919  | CBFB     |  |  |  | 2.076E-11 |  |  |  |  | CBFB     |
| V3SVHSHC_6553496  | Tox2     |  |  |  | 2.292E-11 |  |  |  |  | Tox2     |

|                   |              |  |  |  |           |  |  |  |  |                  |
|-------------------|--------------|--|--|--|-----------|--|--|--|--|------------------|
| V3SVHSHC_6638603  | ZBTB2        |  |  |  | 2.354E-11 |  |  |  |  | ZBTB2            |
| V3SVHSHC_5279399  | SPATA31A6    |  |  |  | 2.357E-11 |  |  |  |  | SPATA31<br>A6    |
| V3SVHSHC_9925931  | TMEM63B      |  |  |  | 2.368E-11 |  |  |  |  | TMEM63B          |
| V3SVHSHC_6630122  | GIMAP7       |  |  |  | 2.510E-11 |  |  |  |  | GIMAP7           |
| V3SVHSHC_6806936  | CISD3        |  |  |  | 2.625E-11 |  |  |  |  | CISD3            |
| V3SVHSHC_8236595  | ZFP62        |  |  |  | 2.763E-11 |  |  |  |  | ZFP62            |
| V3SVHSHC_7635038  | RPP25L       |  |  |  | 2.898E-11 |  |  |  |  | RPP25L           |
| V3SVHSHC_6309956  | FBXO32       |  |  |  | 2.910E-11 |  |  |  |  | FBXO32           |
| V3SVHSHC_6770801  | HOPX         |  |  |  | 2.960E-11 |  |  |  |  | HOPX             |
| V3SVHSHC_9933851  | CD300LD      |  |  |  | 3.020E-11 |  |  |  |  | CD300LD          |
| V3SVHSHC_6894386  | CDH2         |  |  |  | 3.095E-11 |  |  |  |  | CDH2             |
| V3SVHSHC_8815118  | RBM42        |  |  |  | 3.137E-11 |  |  |  |  | RBM42            |
| V3SVHSHC_9424529  | ADAMTSL1     |  |  |  | 3.260E-11 |  |  |  |  | ADAMTSL<br>1     |
| V3SVHSHC_9222833  | SH2D6        |  |  |  | 3.301E-11 |  |  |  |  | SH2D6            |
| V3SVHSHC_4750640  | ZNF747       |  |  |  | 3.599E-11 |  |  |  |  | ZNF747           |
| V3SVHSHC_5339327  | PML          |  |  |  | 3.648E-11 |  |  |  |  | PML              |
| V3SVHSHC_5596529  | NOTCH2       |  |  |  | 3.794E-11 |  |  |  |  | NOTCH2           |
| V3SVHSHC_9375722  | LRRC25       |  |  |  | 3.847E-11 |  |  |  |  | LRRC25           |
| V3SVHSHC_8439710  | NT5DC4       |  |  |  | 4.133E-11 |  |  |  |  | NT5DC4           |
| V3SVHSHC_6898214  | SPATA31A6    |  |  |  | 4.197E-11 |  |  |  |  | SPATA31<br>A6    |
| V3SVHSHC_10265369 | MTHFR        |  |  |  | 4.697E-11 |  |  |  |  | MTHFR            |
| V3SVHSHC_9480497  | KRIT1        |  |  |  | 4.814E-11 |  |  |  |  | KRIT1            |
| V3SVHSHC_6283193  | ZNF589       |  |  |  | 5.339E-11 |  |  |  |  | ZNF589           |
| V3SVHSHC_6084995  | SLC35A3      |  |  |  | 5.362E-11 |  |  |  |  | SLC35A3          |
| V3SVHSHC_8579234  | FAM155A      |  |  |  | 5.405E-11 |  |  |  |  | FAM155A          |
| V3SVHSHC_9449774  | VIL1         |  |  |  | 5.487E-11 |  |  |  |  | VIL1             |
| V3SVHSHC_9040904  | HSD11B1L     |  |  |  | 5.817E-11 |  |  |  |  | HSD11B1L         |
| V3SVHSHC_8810003  | SCAMP2       |  |  |  | 5.939E-11 |  |  |  |  | SCAMP2           |
| V3SVHSHC_7605074  | TEX101       |  |  |  | 5.942E-11 |  |  |  |  | TEX101           |
| V3SVHSHC_9003713  | NDRG4        |  |  |  | 6.099E-11 |  |  |  |  | NDRG4            |
| V3SVHSHC_6584384  | TRIM39-RPP21 |  |  |  | 6.638E-11 |  |  |  |  | TRIM39-<br>RPP21 |
| V3SVHSHC_9100007  | SSPN         |  |  |  | 6.714E-11 |  |  |  |  | SSPN             |
| V3SVHSHC_9791621  | Prrt4        |  |  |  | 6.902E-11 |  |  |  |  | Prrt4            |
| V3SVHSHC_9246527  | HHLA2        |  |  |  | 6.994E-11 |  |  |  |  | HHLA2            |
| V3SVHSHC_4953227  | SENP8        |  |  |  | 6.996E-11 |  |  |  |  | SENP8            |
| V3SVHSHC_7184357  | LOC101928044 |  |  |  | 7.120E-11 |  |  |  |  | LOC10192<br>8044 |
| V3SVHSHC_8038859  | ANXA1        |  |  |  | 7.286E-11 |  |  |  |  | ANXA1            |
| V3SVHSHC_8158880  | XCL1         |  |  |  | 7.319E-11 |  |  |  |  | XCL1             |
| V3SVHSHC_5516966  | ELL2         |  |  |  | 7.436E-11 |  |  |  |  | ELL2             |
| V3SVHSHC_6566828  | C18ORF21     |  |  |  | 7.531E-11 |  |  |  |  | C18ORF2<br>1     |
| V3SVHSHC_5464133  | LSM4         |  |  |  | 7.865E-11 |  |  |  |  | LSM4             |
| V3SVHSHC_6650582  | SOCS5        |  |  |  | 7.917E-11 |  |  |  |  | SOCS5            |
| V3SVHSHC_8741627  | PCDHB11      |  |  |  | 8.118E-11 |  |  |  |  | PCDHB11          |
| V3SVHSHC_10060142 | ZSCAN2       |  |  |  | 8.371E-11 |  |  |  |  | ZSCAN2           |
| V3SVHSHC_9230819  | DHX36        |  |  |  | 8.705E-11 |  |  |  |  | DHX36            |
| V3SVHSHC_9249827  | NKAPL        |  |  |  | 9.019E-11 |  |  |  |  | NKAPL            |
| V3SVHSHC_7624049  | SIGIRR       |  |  |  | 9.187E-11 |  |  |  |  | SIGIRR           |
| V3SVHSHC_6320483  | HSPBAP1      |  |  |  | 9.271E-11 |  |  |  |  | HSPBAP1          |
| V3SVHSHC_8915735  | TGM4         |  |  |  | 9.837E-11 |  |  |  |  | TGM4             |
| V3SVHSHC_7246166  | DAZAP2       |  |  |  | 1.082E-10 |  |  |  |  | DAZAP2           |

|                   |              |  |  |  |           |  |  |  |  |              |
|-------------------|--------------|--|--|--|-----------|--|--|--|--|--------------|
| V3SVHSHC_6899930  | KIAA0391     |  |  |  | 1.116E-10 |  |  |  |  | KIAA0391     |
| V3SVHSHC_6558281  | OLA1         |  |  |  | 1.140E-10 |  |  |  |  | OLA1         |
| V3SVHSHC_4787336  | HOXD9        |  |  |  | 1.183E-10 |  |  |  |  | HOXD9        |
| V3SVHSHC_7437038  | ERBB2IP      |  |  |  | 1.184E-10 |  |  |  |  | ERBB2IP      |
| V3SVHSHC_5407472  | FRMD5        |  |  |  | 1.205E-10 |  |  |  |  | FRMD5        |
| V3SVHSHC_6944942  | LMBR1L       |  |  |  | 1.213E-10 |  |  |  |  | LMBR1L       |
| V3SVHSHC_8707307  | TTC21B       |  |  |  | 1.215E-10 |  |  |  |  | TTC21B       |
| V3SVHSHC_4736516  | LOC101929803 |  |  |  | 1.227E-10 |  |  |  |  | LOC101929803 |
| V3SVHSHC_7695263  | OTOF         |  |  |  | 1.233E-10 |  |  |  |  | OTOF         |
| V3SVHSHC_8199536  | TRIM63       |  |  |  | 1.269E-10 |  |  |  |  | TRIM63       |
| V3SVHSHC_8038958  | RGS17        |  |  |  | 1.278E-10 |  |  |  |  | RGS17        |
| V3SVHSHC_7812974  | CDHR3        |  |  |  | 1.451E-10 |  |  |  |  | CDHR3        |
| V3SVHSHC_7048133  | SPTBN4       |  |  |  | 1.480E-10 |  |  |  |  | SPTBN4       |
| V3SVHSHC_8143733  | OTOP2        |  |  |  | 1.551E-10 |  |  |  |  | OTOP2        |
| V3SVHSHC_8818748  | SOC2         |  |  |  | 1.560E-10 |  |  |  |  | SOC2         |
| V3SVHSHC_4872740  | MMD          |  |  |  | 1.604E-10 |  |  |  |  | MMD          |
| V3SVHSHC_5964413  | WBSCR27      |  |  |  | 1.624E-10 |  |  |  |  | WBSCR27      |
| V3SVHSHC_5322596  | MYOZ3        |  |  |  | 1.633E-10 |  |  |  |  | MYOZ3        |
| V3SVHSHC_8471060  | CCDC28B      |  |  |  | 1.661E-10 |  |  |  |  | CCDC28B      |
| V3SVHSHC_8576363  | FOXS1        |  |  |  | 1.830E-10 |  |  |  |  | FOXS1        |
| V3SVHSHC_5554223  | ARFGAP1      |  |  |  | 1.914E-10 |  |  |  |  | ARFGAP1      |
| V3SVHSHC_10044071 | SCARB2       |  |  |  | 1.919E-10 |  |  |  |  | SCARB2       |
| V3SVHSHC_10193462 | SYN3         |  |  |  | 2.017E-10 |  |  |  |  | SYN3         |
| V3SVHSHC_4775093  | IGFBP7       |  |  |  | 2.056E-10 |  |  |  |  | IGFBP7       |
| V3SVHSHC_5040380  | RNASE2       |  |  |  | 2.156E-10 |  |  |  |  | RNASE2       |
| V3SVHSHC_6843500  | IMMT         |  |  |  | 2.324E-10 |  |  |  |  | IMMT         |
| V3SVHSHC_5292335  | C20ORF27     |  |  |  | 2.347E-10 |  |  |  |  | C20ORF27     |
| V3SVHSHC_5785322  | LOC101059976 |  |  |  | 2.471E-10 |  |  |  |  | LOC101059976 |
| V3SVHSHC_5635238  | DDX3X        |  |  |  | 2.476E-10 |  |  |  |  | DDX3X        |
| V3SVHSHC_6931709  | SLC10A7      |  |  |  | 2.486E-10 |  |  |  |  | SLC10A7      |
| V3SVHSHC_10154819 | IL27RA       |  |  |  | 2.497E-10 |  |  |  |  | IL27RA       |
| V3SVHSHC_7889204  | AGO4         |  |  |  | 2.511E-10 |  |  |  |  | AGO4         |
| V3SVHSHC_6227423  | PGP          |  |  |  | 2.670E-10 |  |  |  |  | PGP          |
| V3SVHSHC_8506832  | PCTP         |  |  |  | 2.674E-10 |  |  |  |  | PCTP         |
| V3SVHSHC_10209467 | TACSTD2      |  |  |  | 2.724E-10 |  |  |  |  | TACSTD2      |
| V3SVHSHC_8993714  | NUP210       |  |  |  | 2.729E-10 |  |  |  |  | NUP210       |
| V3SVHSHC_7006355  | HLA-DOA      |  |  |  | 2.869E-10 |  |  |  |  | HLA-DOA      |
| V3SVHSHC_10325627 | LOH12CR1     |  |  |  | 2.931E-10 |  |  |  |  | LOH12CR1     |
| V3SVHSHC_5734271  | FAM103A1     |  |  |  | 2.995E-10 |  |  |  |  | FAM103A1     |
| V3SVHSHC_5535512  | FRYL         |  |  |  | 3.133E-10 |  |  |  |  | FRYL         |
| V3SVHSHC_9597548  | CCDC121      |  |  |  | 3.238E-10 |  |  |  |  | CCDC121      |
| V3SVHSHC_9062321  | EMC4         |  |  |  | 3.361E-10 |  |  |  |  | EMC4         |
| V3SVHSHC_6704207  | PRKAG3       |  |  |  | 3.380E-10 |  |  |  |  | PRKAG3       |
| V3SVHSHC_6541352  | VCPIP1       |  |  |  | 3.410E-10 |  |  |  |  | VCPIP1       |
| V3SVHSHC_9972032  | RNF186       |  |  |  | 3.552E-10 |  |  |  |  | RNF186       |
| V3SVHSHC_7956722  | MYOF         |  |  |  | 3.591E-10 |  |  |  |  | MYOF         |
| V3SVHSHC_10458386 | GCM1         |  |  |  | 3.682E-10 |  |  |  |  | GCM1         |
| V3SVHSHC_5655302  | KIF27        |  |  |  | 3.686E-10 |  |  |  |  | KIF27        |
| V3SVHSHC_9262037  | DENND4A      |  |  |  | 4.022E-10 |  |  |  |  | DENND4A      |
| V3SVHSHC_9005660  | GMNN         |  |  |  | 4.144E-10 |  |  |  |  | GMNN         |
| V3SVHSHC_9201746  | KNR1         |  |  |  | 4.149E-10 |  |  |  |  | KNR1         |
| V3SVHSHC_7832741  | FER1L6       |  |  |  | 4.229E-10 |  |  |  |  | FER1L6       |

|                   |              |  |  |  |           |  |  |  |  |              |
|-------------------|--------------|--|--|--|-----------|--|--|--|--|--------------|
| V3SVHSHC_9922598  | DOCK11       |  |  |  | 4.268E-10 |  |  |  |  | DOCK11       |
| V3SVHSHC_7403939  | TNFSF12      |  |  |  | 4.292E-10 |  |  |  |  | TNFSF12      |
| V3SVHSHC_7395392  | PAOX         |  |  |  | 4.702E-10 |  |  |  |  | PAOX         |
| V3SVHSHC_10480067 | PCDHGC4      |  |  |  | 4.909E-10 |  |  |  |  | PCDHGC4      |
| V3SVHSHC_6040082  | SLC25A25     |  |  |  | 5.286E-10 |  |  |  |  | SLC25A25     |
| V3SVHSHC_7381895  | LMTK2        |  |  |  | 5.427E-10 |  |  |  |  | LMTK2        |
| V3SVHSHC_5243561  | NHS          |  |  |  | 5.476E-10 |  |  |  |  | NHS          |
| V3SVHSHC_7234880  | SLC35B4      |  |  |  | 5.539E-10 |  |  |  |  | SLC35B4      |
| V3SVHSHC_8072057  | MGARP        |  |  |  | 5.827E-10 |  |  |  |  | MGARP        |
| V3SVHSHC_6842147  | RAB30        |  |  |  | 5.960E-10 |  |  |  |  | RAB30        |
| V3SVHSHC_5123672  | MMP13        |  |  |  | 6.808E-10 |  |  |  |  | MMP13        |
| V3SVHSHC_7866830  | PTPN13       |  |  |  | 7.797E-10 |  |  |  |  | PTPN13       |
| V3SVHSHC_8778488  | TMEM156      |  |  |  | 7.843E-10 |  |  |  |  | TMEM156      |
| V3SVHSHC_9001634  | FBXL17       |  |  |  | 8.025E-10 |  |  |  |  | FBXL17       |
| V3SVHSHC_10630877 | GPR112       |  |  |  | 8.229E-10 |  |  |  |  | GPR112       |
| V3SVHSHC_8260619  | C2ORF16      |  |  |  | 8.485E-10 |  |  |  |  | C2ORF16      |
| V3SVHSHC_4782386  | BRINP1       |  |  |  | 8.558E-10 |  |  |  |  | BRINP1       |
| V3SVHSHC_9877619  | P2RY8        |  |  |  | 9.342E-10 |  |  |  |  | P2RY8        |
| V3SVHSHC_10550621 | Dcaf8        |  |  |  | 9.428E-10 |  |  |  |  | Dcaf8        |
| V3SVHSHC_6687806  | IRX3         |  |  |  | 9.614E-10 |  |  |  |  | IRX3         |
| V3SVHSHC_8607713  | MYO1F        |  |  |  | 1.007E-09 |  |  |  |  | MYO1F        |
| V3SVHSHC_5827001  | PGK1         |  |  |  | 1.072E-09 |  |  |  |  | PGK1         |
| V3SVHSHC_8784263  | ZNF280B      |  |  |  | 1.082E-09 |  |  |  |  | ZNF280B      |
| V3SVHSHC_5704736  | CNGA2        |  |  |  | 1.083E-09 |  |  |  |  | CNGA2        |
| V3SVHSHC_6199142  | FAM153B      |  |  |  | 1.116E-09 |  |  |  |  | FAM153B      |
| V3SVHSHC_6224024  | GPR65        |  |  |  | 1.401E-09 |  |  |  |  | GPR65        |
| V3SVHSHC_5560889  | SLAMF8       |  |  |  | 1.482E-09 |  |  |  |  | SLAMF8       |
| V3SVHSHC_10426211 | USP51        |  |  |  | 1.502E-09 |  |  |  |  | USP51        |
| V3SVHSHC_5219669  | ZNF600       |  |  |  | 1.558E-09 |  |  |  |  | ZNF600       |
| V3SVHSHC_9420404  | CNST         |  |  |  | 1.658E-09 |  |  |  |  | CNST         |
| V3SVHSHC_5663090  | DENND1C      |  |  |  | 1.673E-09 |  |  |  |  | DENND1C      |
| V3SVHSHC_10481387 | C14ORF79     |  |  |  | 1.711E-09 |  |  |  |  | C14ORF79     |
| V3SVHSHC_9902600  | REEP5        |  |  |  | 1.752E-09 |  |  |  |  | REEP5        |
| V3SVHSHC_5448656  | PA2G4        |  |  |  | 1.767E-09 |  |  |  |  | PA2G4        |
| V3SVHSHC_7906991  | CCKBR        |  |  |  | 1.793E-09 |  |  |  |  | CCKBR        |
| V3SVHSHC_7660613  | CDY2B        |  |  |  | 1.858E-09 |  |  |  |  | CDY2B        |
| V3SVHSHC_8766872  | ZNF579       |  |  |  | 1.994E-09 |  |  |  |  | ZNF579       |
| V3SVHSHC_10753076 | ATL1         |  |  |  | 2.285E-09 |  |  |  |  | ATL1         |
| V3SVHSHC_10577417 | Tmem185b     |  |  |  | 2.368E-09 |  |  |  |  | Tmem185b     |
| V3SVHSHC_5526008  | ABCA13       |  |  |  | 2.403E-09 |  |  |  |  | ABCA13       |
| V3SVHSHC_9625400  | BAGE4        |  |  |  | 2.674E-09 |  |  |  |  | BAGE4        |
| V3SVHSHC_10528346 | NEFL         |  |  |  | 2.864E-09 |  |  |  |  | NEFL         |
| V3SVHSHC_8016584  | SERPINA1     |  |  |  | 3.002E-09 |  |  |  |  | SERPINA1     |
| V3SVHSHC_6139610  | Plac9        |  |  |  | 3.151E-09 |  |  |  |  | Plac9        |
| V3SVHSHC_6634940  | LOC101928044 |  |  |  | 3.189E-09 |  |  |  |  | LOC101928044 |
| V3SVHSHC_6842312  | RASAL3       |  |  |  | 3.195E-09 |  |  |  |  | RASAL3       |
| V3SVHSHC_6151490  | NAV3         |  |  |  | 3.232E-09 |  |  |  |  | NAV3         |
| V3SVHSHC_9022721  | MCF2         |  |  |  | 3.255E-09 |  |  |  |  | MCF2         |
| V3SVHSHC_10442546 | ZBTB42       |  |  |  | 3.265E-09 |  |  |  |  | ZBTB42       |
| V3SVHSHC_7061102  | HINFP        |  |  |  | 3.267E-09 |  |  |  |  | HINFP        |
| V3SVHSHC_8194388  | LYRM7        |  |  |  | 3.310E-09 |  |  |  |  | LYRM7        |
| V3SVHSHC_5705726  | NOTCH1       |  |  |  | 3.438E-09 |  |  |  |  | NOTCH1       |
| V3SVHSHC_6806045  | HLA-DPB1     |  |  |  | 3.483E-09 |  |  |  |  | HLA-DPB1     |

|                   |              |  |  |  |           |  |  |  |  |                  |
|-------------------|--------------|--|--|--|-----------|--|--|--|--|------------------|
| V3SVHSHC_9122975  | ANKRD13B     |  |  |  | 3.490E-09 |  |  |  |  | ANKRD13<br>B     |
| V3SVHSHC_7998533  | ACRBP        |  |  |  | 3.502E-09 |  |  |  |  | ACRBP            |
| V3SVHSHC_7722092  | TEX11        |  |  |  | 3.652E-09 |  |  |  |  | TEX11            |
| V3SVHSHC_8737040  | DUSP1        |  |  |  | 3.847E-09 |  |  |  |  | DUSP1            |
| V3SVHSHC_8178284  | REL          |  |  |  | 3.946E-09 |  |  |  |  | REL              |
| V3SVHSHC_6682460  | RASL11A      |  |  |  | 4.082E-09 |  |  |  |  | RASL11A          |
| V3SVHSHC_6704240  | TLK1         |  |  |  | 4.098E-09 |  |  |  |  | TLK1             |
| V3SVHSHC_6032954  | U2AF2        |  |  |  | 4.702E-09 |  |  |  |  | U2AF2            |
| V3SVHSHC_7749185  | STOM         |  |  |  | 4.745E-09 |  |  |  |  | STOM             |
| V3SVHSHC_10773668 | Dlk2         |  |  |  | 5.196E-09 |  |  |  |  | Dlk2             |
| V3SVHSHC_7902437  | Fam71e1      |  |  |  | 6.151E-09 |  |  |  |  | Fam71e1          |
| V3SVHSHC_9410669  | Tchh         |  |  |  | 6.169E-09 |  |  |  |  | Tchh             |
| V3SVHSHC_6338138  | FAM110B      |  |  |  | 6.241E-09 |  |  |  |  | FAM110B          |
| V3SVHSHC_4718234  | HTR2C        |  |  |  | 6.594E-09 |  |  |  |  | HTR2C            |
| V3SVHSHC_10784393 | CYFIP1       |  |  |  | 6.860E-09 |  |  |  |  | CYFIP1           |
| V3SVHSHC_5236565  | ATF1         |  |  |  | 7.824E-09 |  |  |  |  | ATF1             |
| V3SVHSHC_6508088  | MAN2B2       |  |  |  | 7.912E-09 |  |  |  |  | MAN2B2           |
| V3SVHSHC_7457036  | KIF5B        |  |  |  | 8.270E-09 |  |  |  |  | KIF5B            |
| V3SVHSHC_9911015  | LANCL3       |  |  |  | 8.369E-09 |  |  |  |  | LANCL3           |
| V3SVHSHC_6698795  | ODF3L1       |  |  |  | 8.988E-09 |  |  |  |  | ODF3L1           |
| V3SVHSHC_10132412 | TRIB3        |  |  |  | 9.050E-09 |  |  |  |  | TRIB3            |
| V3SVHSHC_9178052  | CD276        |  |  |  | 9.275E-09 |  |  |  |  | CD276            |
| V3SVHSHC_8265305  | SYBU         |  |  |  | 9.315E-09 |  |  |  |  | SYBU             |
| V3SVHSHC_5725691  | GAS2L3       |  |  |  | 9.407E-09 |  |  |  |  | GAS2L3           |
| V3SVHSHC_7709024  | PTPN22       |  |  |  | 9.431E-09 |  |  |  |  | PTPN22           |
| V3SVHSHC_5759549  | SNX4         |  |  |  | 1.026E-08 |  |  |  |  | SNX4             |
| V3SVHSHC_8269496  | SLC6A5       |  |  |  | 1.050E-08 |  |  |  |  | SLC6A5           |
| V3SVHSHC_8776607  | TULP2        |  |  |  | 1.067E-08 |  |  |  |  | TULP2            |
| V3SVHSHC_7513763  | PAPPA2       |  |  |  | 1.071E-08 |  |  |  |  | PAPPA2           |
| V3SVHSHC_7518878  | HYPK         |  |  |  | 1.088E-08 |  |  |  |  | HYPK             |
| V3SVHSHC_8433968  | KANSL1L      |  |  |  | 1.118E-08 |  |  |  |  | KANSL1L          |
| V3SVHSHC_8238575  | DUSP5        |  |  |  | 1.178E-08 |  |  |  |  | DUSP5            |
| V3SVHSHC_5116148  | PRCP         |  |  |  | 1.253E-08 |  |  |  |  | PRCP             |
| V3SVHSHC_10199633 | TMEM114      |  |  |  | 1.325E-08 |  |  |  |  | TMEM114          |
| V3SVHSHC_10235966 | MRPL24       |  |  |  | 1.337E-08 |  |  |  |  | MRPL24           |
| V3SVHSHC_7433144  | FBXL4        |  |  |  | 1.344E-08 |  |  |  |  | FBXL4            |
| V3SVHSHC_6142910  | ENPEP        |  |  |  | 1.355E-08 |  |  |  |  | ENPEP            |
| V3SVHSHC_8849900  | SENP2        |  |  |  | 1.455E-08 |  |  |  |  | SENP2            |
| V3SVHSHC_8584415  | ELFN2        |  |  |  | 1.519E-08 |  |  |  |  | ELFN2            |
| V3SVHSHC_8930222  | NIPBL        |  |  |  | 1.625E-08 |  |  |  |  | NIPBL            |
| V3SVHSHC_8042720  | GAS2L2       |  |  |  | 1.708E-08 |  |  |  |  | GAS2L2           |
| V3SVHSHC_6667841  | RGS6         |  |  |  | 1.779E-08 |  |  |  |  | RGS6             |
| V3SVHSHC_7447862  | C1QTNF7      |  |  |  | 1.862E-08 |  |  |  |  | C1QTNF7          |
| V3SVHSHC_10051925 | HIC2         |  |  |  | 1.887E-08 |  |  |  |  | HIC2             |
| V3SVHSHC_5771198  | WBP2         |  |  |  | 1.950E-08 |  |  |  |  | WBP2             |
| V3SVHSHC_8437499  | PRKD3        |  |  |  | 1.967E-08 |  |  |  |  | PRKD3            |
| V3SVHSHC_5228777  | OR4K2        |  |  |  | 1.977E-08 |  |  |  |  | OR4K2            |
| V3SVHSHC_7035989  | ACIN1        |  |  |  | 1.985E-08 |  |  |  |  | ACIN1            |
| V3SVHSHC_9851846  | TOM1L1       |  |  |  | 1.989E-08 |  |  |  |  | TOM1L1           |
| V3SVHSHC_6980879  | LOC391722    |  |  |  | 2.109E-08 |  |  |  |  | LOC39172<br>2    |
| V3SVHSHC_8784329  | LOC100509091 |  |  |  | 2.290E-08 |  |  |  |  | LOC10050<br>9091 |
| V3SVHSHC_7151489  | OPN1SW       |  |  |  | 2.384E-08 |  |  |  |  | OPN1SW           |

|                   |              |  |  |  |           |  |  |  |  |              |
|-------------------|--------------|--|--|--|-----------|--|--|--|--|--------------|
| V3SVHSHC_7163633  | LOC100996844 |  |  |  | 2.438E-08 |  |  |  |  | LOC100996844 |
| V3SVHSHC_4637186  | SLC4A7       |  |  |  | 2.499E-08 |  |  |  |  | SLC4A7       |
| V3SVHSHC_6877358  | BUD13        |  |  |  | 2.589E-08 |  |  |  |  | BUD13        |
| V3SVHSHC_6561119  | ZDHHC5       |  |  |  | 2.610E-08 |  |  |  |  | ZDHHC5       |
| V3SVHSHC_5087207  | ULK2         |  |  |  | 2.649E-08 |  |  |  |  | ULK2         |
| V3SVHSHC_9389714  | CAPZA1       |  |  |  | 2.688E-08 |  |  |  |  | CAPZA1       |
| V3SVHSHC_10048955 | LOC101927614 |  |  |  | 2.709E-08 |  |  |  |  | LOC101927614 |
| V3SVHSHC_6710147  | SNRPE        |  |  |  | 2.748E-08 |  |  |  |  | SNRPE        |
| V3SVHSHC_10438355 | SGSM1        |  |  |  | 2.891E-08 |  |  |  |  | SGSM1        |
| V3SVHSHC_9526235  | OR11A1       |  |  |  | 2.956E-08 |  |  |  |  | OR11A1       |
| V3SVHSHC_9389252  | SLC6A6       |  |  |  | 3.038E-08 |  |  |  |  | SLC6A6       |
| V3SVHSHC_8447960  | USP18        |  |  |  | 3.364E-08 |  |  |  |  | USP18        |
| V3SVHSHC_7722257  | GAPDHS       |  |  |  | 3.426E-08 |  |  |  |  | GAPDHS       |
| V3SVHSHC_4917851  | NFYA         |  |  |  | 3.533E-08 |  |  |  |  | NFYA         |
| V3SVHSHC_8190461  | ELOVL7       |  |  |  | 3.563E-08 |  |  |  |  | ELOVL7       |
| V3SVHSHC_7664837  | MYL3         |  |  |  | 3.572E-08 |  |  |  |  | MYL3         |
| V3SVHSHC_5667677  | SVIL         |  |  |  | 3.588E-08 |  |  |  |  | SVIL         |
| V3SVHSHC_7627085  | THEM5        |  |  |  | 3.760E-08 |  |  |  |  | THEM5        |
| V3SVHSHC_6368234  | Kcnu1        |  |  |  | 3.925E-08 |  |  |  |  | Kcnu1        |
| V3SVHSHC_5010251  | PROK1        |  |  |  | 4.074E-08 |  |  |  |  | PROK1        |
| V3SVHSHC_8860196  | SEPT1        |  |  |  | 4.177E-08 |  |  |  |  | SEPT1        |
| V3SVHSHC_6422915  | H2AFX        |  |  |  | 4.221E-08 |  |  |  |  | H2AFX        |
| V3SVHSHC_5392820  | B4GALT6      |  |  |  | 4.715E-08 |  |  |  |  | B4GALT6      |
| V3SVHSHC_6982265  | INPP4B       |  |  |  | 4.842E-08 |  |  |  |  | INPP4B       |
| V3SVHSHC_10420436 | TRIM50       |  |  |  | 4.934E-08 |  |  |  |  | TRIM50       |
| V3SVHSHC_7628570  | STARD7       |  |  |  | 5.039E-08 |  |  |  |  | STARD7       |
| V3SVHSHC_10487756 | NCF1         |  |  |  | 5.211E-08 |  |  |  |  | NCF1         |
| V3SVHSHC_6524522  | MRPL23       |  |  |  | 5.425E-08 |  |  |  |  | MRPL23       |
| V3SVHSHC_9987113  | HBA2         |  |  |  | 5.560E-08 |  |  |  |  | HBA2         |
| V3SVHSHC_8733212  | DNASE2B      |  |  |  | 5.566E-08 |  |  |  |  | DNASE2B      |
| V3SVHSHC_6120800  | F11R         |  |  |  | 6.119E-08 |  |  |  |  | F11R         |
| V3SVHSHC_10840889 | GZMM         |  |  |  | 6.267E-08 |  |  |  |  | GZMM         |
| V3SVHSHC_6927287  | POU2F3       |  |  |  | 6.622E-08 |  |  |  |  | POU2F3       |
| V3SVHSHC_4988471  | KRTAP11-1    |  |  |  | 6.707E-08 |  |  |  |  | KRTAP11-1    |
| V3SVHSHC_6397571  | AKT1         |  |  |  | 6.767E-08 |  |  |  |  | AKT1         |
| V3SVHSHC_7098590  | GGN          |  |  |  | 7.597E-08 |  |  |  |  | GGN          |
| V3SVHSHC_9615368  | PYCR2        |  |  |  | 8.099E-08 |  |  |  |  | PYCR2        |
| V3SVHSHC_5329031  | ARRDC5       |  |  |  | 8.665E-08 |  |  |  |  | ARRDC5       |
| V3SVHSHC_10058459 | FOXD4L5      |  |  |  | 9.134E-08 |  |  |  |  | FOXD4L5      |
| V3SVHSHC_5416580  | TVP23C-CDRT4 |  |  |  | 9.403E-08 |  |  |  |  | TVP23C-CDRT4 |
| V3SVHSHC_6973520  | KAT2B        |  |  |  | 9.796E-08 |  |  |  |  | KAT2B        |
| V3SVHSHC_4964744  | CD248        |  |  |  | 1.042E-07 |  |  |  |  | CD248        |
| V3SVHSHC_8561117  | RARS2        |  |  |  | 1.156E-07 |  |  |  |  | RARS2        |
| V3SVHSHC_7599860  | LOC100292952 |  |  |  | 1.252E-07 |  |  |  |  | LOC100292952 |
| V3SVHSHC_6052952  | ZBTB41       |  |  |  | 1.256E-07 |  |  |  |  | ZBTB41       |
| V3SVHSHC_10267811 | RAD50        |  |  |  | 1.258E-07 |  |  |  |  | RAD50        |
| V3SVHSHC_4827563  | C7orf62      |  |  |  | 1.269E-07 |  |  |  |  | C7orf62      |
| V3SVHSHC_5847956  | ARL14        |  |  |  | 1.290E-07 |  |  |  |  | ARL14        |
| V3SVHSHC_7274315  | HLA-F        |  |  |  | 1.311E-07 |  |  |  |  | HLA-F        |

|                   |              |  |  |  |           |  |  |  |  |              |
|-------------------|--------------|--|--|--|-----------|--|--|--|--|--------------|
| V3SVHSHC_10586030 | LOC100132004 |  |  |  | 1.328E-07 |  |  |  |  | LOC100132004 |
| V3SVHSHC_5003024  | TTBK2        |  |  |  | 1.376E-07 |  |  |  |  | TTBK2        |
| V3SVHSHC_9197093  | HDAC2        |  |  |  | 1.379E-07 |  |  |  |  | HDAC2        |
| V3SVHSHC_5691305  | ADCK1        |  |  |  | 1.412E-07 |  |  |  |  | ADCK1        |
| V3SVHSHC_6317447  | CFL2         |  |  |  | 1.448E-07 |  |  |  |  | CFL2         |
| V3SVHSHC_4924682  | POU3F2       |  |  |  | 1.525E-07 |  |  |  |  | POU3F2       |
| V3SVHSHC_7348862  | SLC12A3      |  |  |  | 1.532E-07 |  |  |  |  | SLC12A3      |
| V3SVHSHC_5867624  | NTSR2        |  |  |  | 1.548E-07 |  |  |  |  | NTSR2        |
| V3SVHSHC_5876072  | TSTA3        |  |  |  | 1.617E-07 |  |  |  |  | TSTA3        |
| V3SVHSHC_9402683  | UQCRFS1      |  |  |  | 1.695E-07 |  |  |  |  | UQCRFS1      |
| V3SVHSHC_6918278  | CCDC87       |  |  |  | 1.698E-07 |  |  |  |  | CCDC87       |
| V3SVHSHC_8754002  | ARFIP2       |  |  |  | 1.711E-07 |  |  |  |  | ARFIP2       |
| V3SVHSHC_8286953  | AIMP2        |  |  |  | 1.720E-07 |  |  |  |  | AIMP2        |
| V3SVHSHC_4754699  | Eapp         |  |  |  | 1.744E-07 |  |  |  |  | Eapp         |
| V3SVHSHC_9600650  | RNPEP        |  |  |  | 1.753E-07 |  |  |  |  | RNPEP        |
| V3SVHSHC_9956291  | PLCG2        |  |  |  | 1.756E-07 |  |  |  |  | PLCG2        |
| V3SVHSHC_9794327  | HSPA14       |  |  |  | 1.793E-07 |  |  |  |  | HSPA14       |
| V3SVHSHC_6357806  | MAP3K6       |  |  |  | 1.995E-07 |  |  |  |  | MAP3K6       |
| V3SVHSHC_4980683  | STEAP4       |  |  |  | 2.109E-07 |  |  |  |  | STEAP4       |
| V3SVHSHC_6333023  | PNLIPRP3     |  |  |  | 2.213E-07 |  |  |  |  | PNLIPRP3     |
| V3SVHSHC_6018038  | MARK1        |  |  |  | 2.380E-07 |  |  |  |  | MARK1        |
| V3SVHSHC_5523368  | LOC100130301 |  |  |  | 2.456E-07 |  |  |  |  | LOC100130301 |
| V3SVHSHC_10062518 | C1orf87      |  |  |  | 2.501E-07 |  |  |  |  | C1orf87      |
| V3SVHSHC_10819175 | PATE2        |  |  |  | 2.568E-07 |  |  |  |  | PATE2        |
| V3SVHSHC_8967743  | GAD2         |  |  |  | 2.651E-07 |  |  |  |  | GAD2         |
| V3SVHSHC_5732390  | TINF2        |  |  |  | 2.783E-07 |  |  |  |  | TINF2        |
| V3SVHSHC_4911251  | KIAA0586     |  |  |  | 2.848E-07 |  |  |  |  | KIAA0586     |
| V3SVHSHC_10150595 | DTWD2        |  |  |  | 2.879E-07 |  |  |  |  | DTWD2        |
| V3SVHSHC_7653914  | PLOD2        |  |  |  | 2.900E-07 |  |  |  |  | PLOD2        |
| V3SVHSHC_7387109  | ASMTL        |  |  |  | 2.903E-07 |  |  |  |  | ASMTL        |
| V3SVHSHC_6978899  | C2orf42      |  |  |  | 3.222E-07 |  |  |  |  | C2orf42      |
| V3SVHSHC_6485120  | RBM8A        |  |  |  | 3.277E-07 |  |  |  |  | RBM8A        |
| V3SVHSHC_5761463  | GTF2B        |  |  |  | 3.299E-07 |  |  |  |  | GTF2B        |
| V3SVHSHC_6716087  | MTRNR2L1     |  |  |  | 3.425E-07 |  |  |  |  | MTRNR2L1     |
| V3SVHSHC_10653878 | LOC101928728 |  |  |  | 3.637E-07 |  |  |  |  | LOC101928728 |
| V3SVHSHC_9899630  | TPP1         |  |  |  | 3.648E-07 |  |  |  |  | TPP1         |
| V3SVHSHC_9194981  | LOC101927848 |  |  |  | 3.950E-07 |  |  |  |  | LOC101927848 |
| V3SVHSHC_8221745  | PDP2         |  |  |  | 3.997E-07 |  |  |  |  | PDP2         |
| V3SVHSHC_5057045  | PPARG        |  |  |  | 4.102E-07 |  |  |  |  | PPARG        |
| V3SVHSHC_7113869  | IRAK3        |  |  |  | 4.155E-07 |  |  |  |  | IRAK3        |
| V3SVHSHC_5759021  | ZNF233       |  |  |  | 4.392E-07 |  |  |  |  | ZNF233       |
| V3SVHSHC_8225408  | SHKBP1       |  |  |  | 4.409E-07 |  |  |  |  | SHKBP1       |
| V3SVHSHC_8277779  | EMR1         |  |  |  | 4.409E-07 |  |  |  |  | EMR1         |
| V3SVHSHC_7922798  | TIMM10B      |  |  |  | 4.501E-07 |  |  |  |  | TIMM10B      |
| V3SVHSHC_8269826  | INSIG1       |  |  |  | 4.540E-07 |  |  |  |  | INSIG1       |
| V3SVHSHC_10128518 | MARCH4       |  |  |  | 4.836E-07 |  |  |  |  | MARCH4       |
| V3SVHSHC_8036252  | AXIN1        |  |  |  | 5.069E-07 |  |  |  |  | AXIN1        |
| V3SVHSHC_7020941  | USP3         |  |  |  | 5.346E-07 |  |  |  |  | USP3         |
| V3SVHSHC_6262205  | E2F7         |  |  |  | 5.449E-07 |  |  |  |  | E2F7         |
| V3SVHSHC_4795025  | OR10G4       |  |  |  | 5.776E-07 |  |  |  |  | OR10G4       |



|                   |              |  |  |  |           |  |  |  |  |                  |
|-------------------|--------------|--|--|--|-----------|--|--|--|--|------------------|
| V3SVHSHC_8255603  | RGS18        |  |  |  | 6.465E-07 |  |  |  |  | RGS18            |
| V3SVHSHC_6293027  | C15orf54     |  |  |  | 6.580E-07 |  |  |  |  | C15orf54         |
| V3SVHSHC_5133308  | SACM1L       |  |  |  | 6.802E-07 |  |  |  |  | SACM1L           |
| V3SVHSHC_4978274  | LDHD         |  |  |  | 7.275E-07 |  |  |  |  | LDHD             |
| V3SVHSHC_5749814  | SUPT20HL2    |  |  |  | 7.314E-07 |  |  |  |  | SUPT20H<br>L2    |
| V3SVHSHC_6106148  | BTC          |  |  |  | 7.438E-07 |  |  |  |  | BTC              |
| V3SVHSHC_6551384  | CLINT1       |  |  |  | 8.036E-07 |  |  |  |  | CLINT1           |
| V3SVHSHC_9133535  | ZFYVE20      |  |  |  | 8.057E-07 |  |  |  |  | ZFYVE20          |
| V3SVHSHC_9745124  | TTC13        |  |  |  | 8.311E-07 |  |  |  |  | TTC13            |
| V3SVHSHC_4657118  | SNAI1        |  |  |  | 8.518E-07 |  |  |  |  | SNAI1            |
| V3SVHSHC_7165250  | TSSK2        |  |  |  | 8.601E-07 |  |  |  |  | TSSK2            |
| V3SVHSHC_8569532  | MAFA         |  |  |  | 9.070E-07 |  |  |  |  | MAFA             |
| V3SVHSHC_5997380  | CACNA1A      |  |  |  | 9.123E-07 |  |  |  |  | CACNA1A          |
| V3SVHSHC_10036217 | LOC101930075 |  |  |  | 9.615E-07 |  |  |  |  | LOC10193<br>0075 |
| V3SVHSHC_5679194  | SERPINE2     |  |  |  | 9.723E-07 |  |  |  |  | SERPINE2         |
| V3SVHSHC_9254414  | GLRX2        |  |  |  | 9.912E-07 |  |  |  |  | GLRX2            |
| V3SVHSHC_8208479  | SPSB2        |  |  |  | 1.011E-06 |  |  |  |  | SPSB2            |
| V3SVHSHC_8262335  | TNFSF12      |  |  |  | 1.014E-06 |  |  |  |  | TNFSF12          |
| V3SVHSHC_7375163  | ACY3         |  |  |  | 1.041E-06 |  |  |  |  | ACY3             |
| V3SVHSHC_7253822  | RBP3         |  |  |  | 1.080E-06 |  |  |  |  | RBP3             |
| V3SVHSHC_7324178  | CA6          |  |  |  | 1.112E-06 |  |  |  |  | CA6              |
| V3SVHSHC_9618239  | AVPR1A       |  |  |  | 1.126E-06 |  |  |  |  | AVPR1A           |
| V3SVHSHC_4698368  | STRIP2       |  |  |  | 1.155E-06 |  |  |  |  | STRIP2           |
| V3SVHSHC_6495911  | TCP1         |  |  |  | 1.192E-06 |  |  |  |  | TCP1             |
| V3SVHSHC_5767403  | COL1A2       |  |  |  | 1.234E-06 |  |  |  |  | COL1A2           |
| V3SVHSHC_5658140  | GHR          |  |  |  | 1.252E-06 |  |  |  |  | GHR              |
| V3SVHSHC_9405455  | C1QTNF3      |  |  |  | 1.289E-06 |  |  |  |  | C1QTNF3          |
| V3SVHSHC_9983054  | NAPG         |  |  |  | 1.306E-06 |  |  |  |  | NAPG             |
| V3SVHSHC_7088162  | OR10AD1      |  |  |  | 1.475E-06 |  |  |  |  | OR10AD1          |
| V3SVHSHC_4712393  | PTPRCAP      |  |  |  | 1.556E-06 |  |  |  |  | PTPRCAP          |
| V3SVHSHC_7639592  | FBXO48       |  |  |  | 1.593E-06 |  |  |  |  | FBXO48           |
| V3SVHSHC_5840828  | BTBD11       |  |  |  | 1.628E-06 |  |  |  |  | BTBD11           |
| V3SVHSHC_8255141  | CTNNB1       |  |  |  | 1.631E-06 |  |  |  |  | CTNNB1           |
| V3SVHSHC_7677707  | KIAA1024     |  |  |  | 1.658E-06 |  |  |  |  | KIAA1024         |
| V3SVHSHC_7534916  | NKG7         |  |  |  | 1.675E-06 |  |  |  |  | NKG7             |
| V3SVHSHC_7620452  | TMUB1        |  |  |  | 1.728E-06 |  |  |  |  | TMUB1            |
| V3SVHSHC_7273259  | ALDH4A1      |  |  |  | 1.740E-06 |  |  |  |  | ALDH4A1          |
| V3SVHSHC_7877159  | BLVRB        |  |  |  | 1.866E-06 |  |  |  |  | BLVRB            |
| V3SVHSHC_8206928  | HAGHL        |  |  |  | 1.873E-06 |  |  |  |  | HAGHL            |
| V3SVHSHC_7308536  | NAAA         |  |  |  | 1.976E-06 |  |  |  |  | NAAA             |
| V3SVHSHC_9095189  | PTPRR        |  |  |  | 2.000E-06 |  |  |  |  | PTPRR            |
| V3SVHSHC_7524752  | OR2D2        |  |  |  | 2.075E-06 |  |  |  |  | OR2D2            |
| V3SVHSHC_5113673  | ZNF132       |  |  |  | 2.084E-06 |  |  |  |  | ZNF132           |
| V3SVHSHC_6694109  | ELF2         |  |  |  | 2.147E-06 |  |  |  |  | ELF2             |
| V3SVHSHC_4999031  | SDF2L1       |  |  |  | 2.157E-06 |  |  |  |  | SDF2L1           |
| V3SVHSHC_4818488  | C9orf139     |  |  |  | 2.248E-06 |  |  |  |  | C9orf139         |
| V3SVHSHC_9352391  | RUNDC1       |  |  |  | 2.289E-06 |  |  |  |  | RUNDC1           |
| V3SVHSHC_6975830  | GPR34        |  |  |  | 2.365E-06 |  |  |  |  | GPR34            |
| V3SVHSHC_10374764 | GOLGA6L4     |  |  |  | 2.506E-06 |  |  |  |  | GOLGA6L<br>4     |
| V3SVHSHC_8904515  | LRRC43       |  |  |  | 2.523E-06 |  |  |  |  | LRRC43           |
| V3SVHSHC_7448951  | KAT6B        |  |  |  | 2.596E-06 |  |  |  |  | KAT6B            |

|                   |              |  |  |  |           |  |  |  |  |              |
|-------------------|--------------|--|--|--|-----------|--|--|--|--|--------------|
| V3SVHSHC_7154261  | LOC100509091 |  |  |  | 2.641E-06 |  |  |  |  | LOC100509091 |
| V3SVHSHC_9091163  | AXDND1       |  |  |  | 2.777E-06 |  |  |  |  | AXDND1       |
| V3SVHSHC_8566067  | ACOXL        |  |  |  | 3.208E-06 |  |  |  |  | ACOXL        |
| V3SVHSHC_5217689  | ARL6IP5      |  |  |  | 3.224E-06 |  |  |  |  | ARL6IP5      |
| V3SVHSHC_5406713  | PDXDC1       |  |  |  | 3.380E-06 |  |  |  |  | PDXDC1       |
| V3SVHSHC_5037905  | TRAPPC2L     |  |  |  | 3.651E-06 |  |  |  |  | TRAPPC2L     |
| V3SVHSHC_9088556  | RSAD1        |  |  |  | 3.653E-06 |  |  |  |  | RSAD1        |
| V3SVHSHC_10378460 | ANKRD30A     |  |  |  | 3.817E-06 |  |  |  |  | ANKRD30A     |
| V3SVHSHC_8839076  | SLC35F5      |  |  |  | 3.882E-06 |  |  |  |  | SLC35F5      |
| V3SVHSHC_5847065  | ZNRD1        |  |  |  | 3.893E-06 |  |  |  |  | ZNRD1        |
| V3SVHSHC_9653153  | TAGLN3       |  |  |  | 3.908E-06 |  |  |  |  | TAGLN3       |
| V3SVHSHC_10422185 | TRUB1        |  |  |  | 4.109E-06 |  |  |  |  | TRUB1        |
| V3SVHSHC_8642264  | SLC24A3      |  |  |  | 4.250E-06 |  |  |  |  | SLC24A3      |
| V3SVHSHC_4825418  | C7ORF34      |  |  |  | 4.515E-06 |  |  |  |  | C7ORF34      |
| V3SVHSHC_8101988  | CES3         |  |  |  | 5.074E-06 |  |  |  |  | CES3         |
| V3SVHSHC_5825549  | KLC2         |  |  |  | 5.081E-06 |  |  |  |  | KLC2         |
| V3SVHSHC_5986358  | OR4N4        |  |  |  | 5.175E-06 |  |  |  |  | OR4N4        |
| V3SVHSHC_5472416  | CCL28        |  |  |  | 5.851E-06 |  |  |  |  | CCL28        |
| V3SVHSHC_6807167  | MRPS7        |  |  |  | 5.852E-06 |  |  |  |  | MRPS7        |
| V3SVHSHC_6246365  | NR5A2        |  |  |  | 6.085E-06 |  |  |  |  | NR5A2        |
| V3SVHSHC_4732094  | DTD1         |  |  |  | 6.143E-06 |  |  |  |  | DTD1         |
| V3SVHSHC_4723349  | CACNA1I      |  |  |  | 6.184E-06 |  |  |  |  | CACNA1I      |
| V3SVHSHC_6785288  | C7orf60      |  |  |  | 6.423E-06 |  |  |  |  | C7orf60      |
| V3SVHSHC_6584021  | HRSP12       |  |  |  | 6.629E-06 |  |  |  |  | HRSP12       |
| V3SVHSHC_6114827  | Ankle1       |  |  |  | 6.703E-06 |  |  |  |  | Ankle1       |
| V3SVHSHC_8607152  | ZNF791       |  |  |  | 6.820E-06 |  |  |  |  | ZNF791       |
| V3SVHSHC_8759513  | C6ORF25      |  |  |  | 6.960E-06 |  |  |  |  | C6ORF25      |
| V3SVHSHC_7904945  | LOC101930551 |  |  |  | 7.205E-06 |  |  |  |  | LOC101930551 |
| V3SVHSHC_9907154  | TNFRSF21     |  |  |  | 7.221E-06 |  |  |  |  | TNFRSF21     |
| V3SVHSHC_5890724  | MS4A12       |  |  |  | 7.346E-06 |  |  |  |  | MS4A12       |
| V3SVHSHC_4954811  | OR10G3       |  |  |  | 7.437E-06 |  |  |  |  | OR10G3       |
| V3SVHSHC_6208547  | ZBTB8B       |  |  |  | 7.524E-06 |  |  |  |  | ZBTB8B       |
| V3SVHSHC_9604412  | OVCA2        |  |  |  | 7.727E-06 |  |  |  |  | OVCA2        |
| V3SVHSHC_6266066  | GTF2H1       |  |  |  | 8.186E-06 |  |  |  |  | GTF2H1       |
| V3SVHSHC_5794727  | UBE2D2       |  |  |  | 8.478E-06 |  |  |  |  | UBE2D2       |
| V3SVHSHC_9758159  | DGKI         |  |  |  | 8.514E-06 |  |  |  |  | DGKI         |
| V3SVHSHC_9761954  | IDO1         |  |  |  | 8.586E-06 |  |  |  |  | IDO1         |
| V3SVHSHC_9817559  | CEP85L       |  |  |  | 8.661E-06 |  |  |  |  | CEP85L       |
| V3SVHSHC_6387506  | SLC22A2      |  |  |  | 8.970E-06 |  |  |  |  | SLC22A2      |
| V3SVHSHC_6364538  | G6PC3        |  |  |  | 8.984E-06 |  |  |  |  | G6PC3        |
| V3SVHSHC_6556466  | EML4         |  |  |  | 9.014E-06 |  |  |  |  | EML4         |
| V3SVHSHC_8134922  | OR5K1        |  |  |  | 9.141E-06 |  |  |  |  | OR5K1        |
| V3SVHSHC_9956390  | CCDC33       |  |  |  | 9.214E-06 |  |  |  |  | CCDC33       |
| V3SVHSHC_10293320 | LOC285500    |  |  |  | 9.336E-06 |  |  |  |  | LOC285500    |
| V3SVHSHC_5009360  | OR1F1        |  |  |  | 9.432E-06 |  |  |  |  | OR1F1        |
| V3SVHSHC_5632796  | ZMPSTE24     |  |  |  | 9.943E-06 |  |  |  |  | ZMPSTE24     |
| V3SVHSHC_6269795  | RSPH1        |  |  |  | 1.009E-05 |  |  |  |  | RSPH1        |
| V3SVHSHC_5742884  | SERINC1      |  |  |  | 1.038E-05 |  |  |  |  | SERINC1      |

|                   |          |  |  |  |           |  |  |  |  |          |
|-------------------|----------|--|--|--|-----------|--|--|--|--|----------|
| V3SVHSHC_8271773  | ZCCHC3   |  |  |  | 1.045E-05 |  |  |  |  | ZCCHC3   |
| V3SVHSHC_8263556  | S1PR5    |  |  |  | 1.053E-05 |  |  |  |  | S1PR5    |
| V3SVHSHC_9169934  | NCSTN    |  |  |  | 1.054E-05 |  |  |  |  | NCSTN    |
| V3SVHSHC_6312266  | CENPO    |  |  |  | 1.141E-05 |  |  |  |  | CENPO    |
| V3SVHSHC_6374900  | SNX1     |  |  |  | 1.159E-05 |  |  |  |  | SNX1     |
| V3SVHSHC_8674142  | DRD1     |  |  |  | 1.168E-05 |  |  |  |  | DRD1     |
| V3SVHSHC_9818582  | EHD3     |  |  |  | 1.207E-05 |  |  |  |  | EHD3     |
| V3SVHSHC_8383082  | GRIN2A   |  |  |  | 1.250E-05 |  |  |  |  | GRIN2A   |
| V3SVHSHC_8866796  | VANGL1   |  |  |  | 1.253E-05 |  |  |  |  | VANGL1   |
| V3SVHSHC_7158155  | OFD1     |  |  |  | 1.265E-05 |  |  |  |  | OFD1     |
| V3SVHSHC_8896925  | KRT1     |  |  |  | 1.327E-05 |  |  |  |  | KRT1     |
| V3SVHSHC_6495680  | PLAGL1   |  |  |  | 1.339E-05 |  |  |  |  | PLAGL1   |
| V3SVHSHC_6125585  | HFM1     |  |  |  | 1.381E-05 |  |  |  |  | HFM1     |
| V3SVHSHC_8709353  | ZNF248   |  |  |  | 1.382E-05 |  |  |  |  | ZNF248   |
| V3SVHSHC_8170925  | RPGR     |  |  |  | 1.391E-05 |  |  |  |  | RPGR     |
| V3SVHSHC_9677342  | RARRES2  |  |  |  | 1.431E-05 |  |  |  |  | RARRES2  |
| V3SVHSHC_10615895 | LYPD1    |  |  |  | 1.467E-05 |  |  |  |  | LYPD1    |
| V3SVHSHC_9533495  | LMAN1L   |  |  |  | 1.520E-05 |  |  |  |  | LMAN1L   |
| V3SVHSHC_5415755  | TTBK1    |  |  |  | 1.619E-05 |  |  |  |  | TTBK1    |
| V3SVHSHC_7242569  | FAM209A  |  |  |  | 1.631E-05 |  |  |  |  | FAM209A  |
| V3SVHSHC_10063706 | HDLBP    |  |  |  | 1.655E-05 |  |  |  |  | HDLBP    |
| V3SVHSHC_8979557  | MAP3K1   |  |  |  | 1.672E-05 |  |  |  |  | MAP3K1   |
| V3SVHSHC_4734371  | CARD9    |  |  |  | 1.693E-05 |  |  |  |  | CARD9    |
| V3SVHSHC_9057173  | SNTB1    |  |  |  | 1.804E-05 |  |  |  |  | SNTB1    |
| V3SVHSHC_6650945  | SOX18    |  |  |  | 1.860E-05 |  |  |  |  | SOX18    |
| V3SVHSHC_8630549  | C12orf76 |  |  |  | 1.875E-05 |  |  |  |  | C12orf76 |
| V3SVHSHC_7581578  | NXN      |  |  |  | 1.908E-05 |  |  |  |  | NXN      |
| V3SVHSHC_6087734  | PGM2     |  |  |  | 1.933E-05 |  |  |  |  | PGM2     |
| V3SVHSHC_6200099  | DNAH8    |  |  |  | 1.945E-05 |  |  |  |  | DNAH8    |
| V3SVHSHC_9833663  | RND1     |  |  |  | 1.981E-05 |  |  |  |  | RND1     |
| V3SVHSHC_7537820  | ATP7A    |  |  |  | 2.173E-05 |  |  |  |  | ATP7A    |
| V3SVHSHC_9493598  | LMTK3    |  |  |  | 2.270E-05 |  |  |  |  | LMTK3    |
| V3SVHSHC_7659854  | C15orf61 |  |  |  | 2.278E-05 |  |  |  |  | C15orf61 |
| V3SVHSHC_9622034  | CCDC22   |  |  |  | 2.336E-05 |  |  |  |  | CCDC22   |
| V3SVHSHC_6080012  | TRIB1    |  |  |  | 2.474E-05 |  |  |  |  | TRIB1    |
| V3SVHSHC_8835083  | ANKRD54  |  |  |  | 2.766E-05 |  |  |  |  | ANKRD54  |
| V3SVHSHC_8752088  | UBE2QL1  |  |  |  | 2.770E-05 |  |  |  |  | UBE2QL1  |
| V3SVHSHC_9837788  | KIFAP3   |  |  |  | 2.840E-05 |  |  |  |  | KIFAP3   |
| V3SVHSHC_9191912  | FILIP1L  |  |  |  | 2.861E-05 |  |  |  |  | FILIP1L  |
| V3SVHSHC_7199339  | ABCF2    |  |  |  | 2.890E-05 |  |  |  |  | ABCF2    |
| V3SVHSHC_10412813 | IGFL3    |  |  |  | 2.909E-05 |  |  |  |  | IGFL3    |
| V3SVHSHC_5450306  | PPT2     |  |  |  | 2.933E-05 |  |  |  |  | PPT2     |
| V3SVHSHC_10655198 | TPBGL    |  |  |  | 2.937E-05 |  |  |  |  | TPBGL    |
| V3SVHSHC_6811952  | NDUFS5   |  |  |  | 3.050E-05 |  |  |  |  | NDUFS5   |
| V3SVHSHC_4689722  | GSG1     |  |  |  | 3.108E-05 |  |  |  |  | GSG1     |
| V3SVHSHC_10521944 | WRN      |  |  |  | 3.232E-05 |  |  |  |  | WRN      |
| V3SVHSHC_7556201  | ZNF684   |  |  |  | 3.366E-05 |  |  |  |  | ZNF684   |
| V3SVHSHC_7300154  | GMEB1    |  |  |  | 3.366E-05 |  |  |  |  | GMEB1    |
| V3SVHSHC_10402154 | STAT5A   |  |  |  | 3.386E-05 |  |  |  |  | STAT5A   |
| V3SVHSHC_10292627 | TENM2    |  |  |  | 3.425E-05 |  |  |  |  | TENM2    |
| V3SVHSHC_4989032  | CACNA1B  |  |  |  | 3.432E-05 |  |  |  |  | CACNA1B  |
| V3SVHSHC_8618735  | KCNV2    |  |  |  | 3.513E-05 |  |  |  |  | KCNV2    |
| V3SVHSHC_9162278  | QPCT     |  |  |  | 3.741E-05 |  |  |  |  | QPCT     |
| V3SVHSHC_10289195 | DUOX1    |  |  |  | 3.883E-05 |  |  |  |  | DUOX1    |
| V3SVHSHC_10781357 | GPC1     |  |  |  | 3.926E-05 |  |  |  |  | GPC1     |

|                   |              |  |  |  |           |  |  |  |  |              |
|-------------------|--------------|--|--|--|-----------|--|--|--|--|--------------|
| V3SVHSHC_9525080  | PDE6H        |  |  |  | 4.029E-05 |  |  |  |  | PDE6H        |
| V3SVHSHC_4755524  | AKT1S1       |  |  |  | 4.128E-05 |  |  |  |  | AKT1S1       |
| V3SVHSHC_8341469  | LOC100293704 |  |  |  | 4.325E-05 |  |  |  |  | LOC100293704 |
| V3SVHSHC_7665101  | WFDC6        |  |  |  | 4.472E-05 |  |  |  |  | WFDC6        |
| V3SVHSHC_8571314  | OSGEPL1      |  |  |  | 4.503E-05 |  |  |  |  | OSGEPL1      |
| V3SVHSHC_9637280  | SKP2         |  |  |  | 4.535E-05 |  |  |  |  | SKP2         |
| V3SVHSHC_9321965  | KPRP         |  |  |  | 4.718E-05 |  |  |  |  | KPRP         |
| V3SVHSHC_6425555  | NDOR1        |  |  |  | 4.794E-05 |  |  |  |  | NDOR1        |
| V3SVHSHC_5356619  | SRI          |  |  |  | 4.997E-05 |  |  |  |  | SRI          |
| V3SVHSHC_9878906  | CAPN10       |  |  |  | 5.061E-05 |  |  |  |  | CAPN10       |
| V3SVHSHC_9021203  | VRK3         |  |  |  | 5.467E-05 |  |  |  |  | VRK3         |
| V3SVHSHC_5473076  | SLC25A2      |  |  |  | 5.668E-05 |  |  |  |  | SLC25A2      |
| V3SVHSHC_10428521 | Aspg         |  |  |  | 5.847E-05 |  |  |  |  | Aspg         |
| V3SVHSHC_8999654  | TSSC4        |  |  |  | 5.913E-05 |  |  |  |  | TSSC4        |
| V3SVHSHC_8183366  | LSM12        |  |  |  | 5.916E-05 |  |  |  |  | LSM12        |
| V3SVHSHC_5526437  | SCFD2        |  |  |  | 6.048E-05 |  |  |  |  | SCFD2        |
| V3SVHSHC_9715523  | ZNF263       |  |  |  | 6.052E-05 |  |  |  |  | ZNF263       |
| V3SVHSHC_8488946  | CCNG1        |  |  |  | 6.076E-05 |  |  |  |  | CCNG1        |
| V3SVHSHC_7444496  | BMP10        |  |  |  | 6.083E-05 |  |  |  |  | BMP10        |
| V3SVHSHC_8447465  | NSUN7        |  |  |  | 6.099E-05 |  |  |  |  | NSUN7        |
| V3SVHSHC_9732023  | LOC100996318 |  |  |  | 6.349E-05 |  |  |  |  | LOC100996318 |
| V3SVHSHC_7668071  | EML2         |  |  |  | 6.457E-05 |  |  |  |  | EML2         |
| V3SVHSHC_7503302  | MMADHC       |  |  |  | 6.614E-05 |  |  |  |  | MMADHC       |
| V3SVHSHC_5389817  | OR6M1        |  |  |  | 6.656E-05 |  |  |  |  | OR6M1        |
| V3SVHSHC_8612234  | CTNNB1       |  |  |  | 6.660E-05 |  |  |  |  | CTNNB1       |
| V3SVHSHC_8285765  | UBE3A        |  |  |  | 6.842E-05 |  |  |  |  | UBE3A        |
| V3SVHSHC_6697739  | FGD6         |  |  |  | 6.859E-05 |  |  |  |  | FGD6         |
| V3SVHSHC_9962759  | LAMA1        |  |  |  | 7.675E-05 |  |  |  |  | LAMA1        |
| V3SVHSHC_7156406  | USB1         |  |  |  | 7.722E-05 |  |  |  |  | USB1         |
| V3SVHSHC_6446180  | TMEM178A     |  |  |  | 7.785E-05 |  |  |  |  | TMEM178A     |
| V3SVHSHC_10309457 | CDADC1       |  |  |  | 7.886E-05 |  |  |  |  | CDADC1       |
| V3SVHSHC_7409945  | MTMR7        |  |  |  | 8.160E-05 |  |  |  |  | MTMR7        |
| V3SVHSHC_9152114  | NPC1         |  |  |  | 8.194E-05 |  |  |  |  | NPC1         |
| V3SVHSHC_6069254  | MCC          |  |  |  | 8.623E-05 |  |  |  |  | MCC          |
| V3SVHSHC_7617218  | CLEC4M       |  |  |  | 8.695E-05 |  |  |  |  | CLEC4M       |
| V3SVHSHC_6466937  | DSCR3        |  |  |  | 9.018E-05 |  |  |  |  | DSCR3        |
| V3SVHSHC_10212041 | THAP2        |  |  |  | 9.059E-05 |  |  |  |  | THAP2        |
| V3SVHSHC_6668699  | OR12D3       |  |  |  | 9.226E-05 |  |  |  |  | OR12D3       |
| V3SVHSHC_8658335  | VN1R5        |  |  |  | 9.444E-05 |  |  |  |  | VN1R5        |
| V3SVHSHC_5870330  | LOC101929702 |  |  |  | 9.547E-05 |  |  |  |  | LOC101929702 |
| V3SVHSHC_9106145  | ZBP2         |  |  |  | 9.585E-05 |  |  |  |  | ZBP2         |
| V3SVHSHC_8249498  | SPRED1       |  |  |  | 9.652E-05 |  |  |  |  | SPRED1       |
| V3SVHSHC_10361432 | TRERF1       |  |  |  | 9.662E-05 |  |  |  |  | TRERF1       |
| V3SVHSHC_6406613  | AAED1        |  |  |  | 9.804E-05 |  |  |  |  | AAED1        |
| V3SVHSHC_7921181  | SPATA2       |  |  |  | 9.804E-05 |  |  |  |  | SPATA2       |
| V3SVHSHC_10307609 | TMEM45B      |  |  |  | 9.934E-05 |  |  |  |  | TMEM45B      |
| V3SVHSHC_7480598  | PRSS57       |  |  |  | 1.006E-04 |  |  |  |  | PRSS57       |
| V3SVHSHC_6294116  | DIABLO       |  |  |  | 1.012E-04 |  |  |  |  | DIABLO       |
| V3SVHSHC_6656093  | STC1         |  |  |  | 1.013E-04 |  |  |  |  | STC1         |
| V3SVHSHC_10216595 | TMEM253      |  |  |  | 1.016E-04 |  |  |  |  | TMEM253      |
| V3SVHSHC_6182576  | GLB1L3       |  |  |  | 1.051E-04 |  |  |  |  | GLB1L3       |

|                   |           |  |  |  |           |  |  |  |  |           |
|-------------------|-----------|--|--|--|-----------|--|--|--|--|-----------|
| V3SVHSHC_9041597  | SMPX      |  |  |  | 1.061E-04 |  |  |  |  | SMPX      |
| V3SVHSHC_4703879  | TBC1D29   |  |  |  | 1.095E-04 |  |  |  |  | TBC1D29   |
| V3SVHSHC_9112481  | ALPP      |  |  |  | 1.111E-04 |  |  |  |  | ALPP      |
| V3SVHSHC_9174158  | SPRY4     |  |  |  | 1.117E-04 |  |  |  |  | SPRY4     |
| V3SVHSHC_9035987  | CLEC17A   |  |  |  | 1.119E-04 |  |  |  |  | CLEC17A   |
| V3SVHSHC_6022988  | C2orf27B  |  |  |  | 1.163E-04 |  |  |  |  | C2orf27B  |
| V3SVHSHC_8824358  | LRRC30    |  |  |  | 1.164E-04 |  |  |  |  | LRRC30    |
| V3SVHSHC_7362029  | AP3B1     |  |  |  | 1.233E-04 |  |  |  |  | AP3B1     |
| V3SVHSHC_7481753  | OR2T8     |  |  |  | 1.238E-04 |  |  |  |  | OR2T8     |
| V3SVHSHC_6105092  | RNF150    |  |  |  | 1.241E-04 |  |  |  |  | RNF150    |
| V3SVHSHC_9489044  | KRT86     |  |  |  | 1.283E-04 |  |  |  |  | KRT86     |
| V3SVHSHC_7588508  | CDC14A    |  |  |  | 1.342E-04 |  |  |  |  | CDC14A    |
| V3SVHSHC_4980815  | SUSD5     |  |  |  | 1.351E-04 |  |  |  |  | SUSD5     |
| V3SVHSHC_5998931  | Ankrd52   |  |  |  | 1.378E-04 |  |  |  |  | Ankrd52   |
| V3SVHSHC_4760441  | LEMD2     |  |  |  | 1.408E-04 |  |  |  |  | LEMD2     |
| V3SVHSHC_9551612  | ELMOD2    |  |  |  | 1.473E-04 |  |  |  |  | ELMOD2    |
| V3SVHSHC_7839242  | C15orf57  |  |  |  | 1.629E-04 |  |  |  |  | C15orf57  |
| V3SVHSHC_4873928  | REPIN1    |  |  |  | 1.648E-04 |  |  |  |  | REPIN1    |
| V3SVHSHC_4801394  | FOXL2     |  |  |  | 1.723E-04 |  |  |  |  | FOXL2     |
| V3SVHSHC_10518380 | TAF6L     |  |  |  | 1.760E-04 |  |  |  |  | TAF6L     |
| V3SVHSHC_4717574  | GCSAML    |  |  |  | 1.839E-04 |  |  |  |  | GCSAML    |
| V3SVHSHC_6347246  | NARFL     |  |  |  | 1.935E-04 |  |  |  |  | NARFL     |
| V3SVHSHC_6918839  | TUBB2A    |  |  |  | 1.993E-04 |  |  |  |  | TUBB2A    |
| V3SVHSHC_10076642 | EIF4ENIF1 |  |  |  | 2.006E-04 |  |  |  |  | EIF4ENIF1 |
| V3SVHSHC_6807596  | OR4P4     |  |  |  | 2.084E-04 |  |  |  |  | OR4P4     |
| V3SVHSHC_6633653  | C15orf53  |  |  |  | 2.195E-04 |  |  |  |  | C15orf53  |
| V3SVHSHC_9923357  | GRM2      |  |  |  | 2.377E-04 |  |  |  |  | GRM2      |
| V3SVHSHC_6580061  | CLDN1     |  |  |  | 2.482E-04 |  |  |  |  | CLDN1     |
| V3SVHSHC_5489411  | MTMR6     |  |  |  | 2.568E-04 |  |  |  |  | MTMR6     |
| V3SVHSHC_4716683  | CD40LG    |  |  |  | 2.701E-04 |  |  |  |  | CD40LG    |
| V3SVHSHC_7939991  | SPON2     |  |  |  | 2.772E-04 |  |  |  |  | SPON2     |
| V3SVHSHC_6684737  | MTUS2     |  |  |  | 2.785E-04 |  |  |  |  | MTUS2     |
| V3SVHSHC_8087699  | RABGEF1   |  |  |  | 2.835E-04 |  |  |  |  | RABGEF1   |
| V3SVHSHC_5543927  | CRISP1    |  |  |  | 2.912E-04 |  |  |  |  | CRISP1    |
| V3SVHSHC_10449773 | CECR6     |  |  |  | 3.048E-04 |  |  |  |  | CECR6     |
| V3SVHSHC_4788029  | PRAMEF10  |  |  |  | 3.076E-04 |  |  |  |  | PRAMEF10  |
| V3SVHSHC_9446012  | YWHAG     |  |  |  | 3.196E-04 |  |  |  |  | YWHAG     |
| V3SVHSHC_8085422  | TNFRSF1B  |  |  |  | 3.278E-04 |  |  |  |  | TNFRSF1B  |
| V3SVHSHC_8172179  | VPS52     |  |  |  | 3.307E-04 |  |  |  |  | VPS52     |
| V3SVHSHC_8071694  | LRIG3     |  |  |  | 3.362E-04 |  |  |  |  | LRIG3     |
| V3SVHSHC_4992167  | UNC79     |  |  |  | 3.449E-04 |  |  |  |  | UNC79     |
| V3SVHSHC_5499773  | RHOD      |  |  |  | 3.513E-04 |  |  |  |  | RHOD      |
| V3SVHSHC_4858517  | CDK3      |  |  |  | 3.634E-04 |  |  |  |  | CDK3      |
| V3SVHSHC_5053481  | C12orf71  |  |  |  | 3.877E-04 |  |  |  |  | C12orf71  |
| V3SVHSHC_10739579 | AQP5      |  |  |  | 3.898E-04 |  |  |  |  | AQP5      |
| V3SVHSHC_5510234  | DPYSL3    |  |  |  | 3.959E-04 |  |  |  |  | DPYSL3    |
| V3SVHSHC_10693478 | NGB       |  |  |  | 4.004E-04 |  |  |  |  | NGB       |
| V3SVHSHC_8664737  | KIAA0513  |  |  |  | 4.458E-04 |  |  |  |  | KIAA0513  |
| V3SVHSHC_9552239  | STAB1     |  |  |  | 4.606E-04 |  |  |  |  | STAB1     |
| V3SVHSHC_5789282  | KRT6A     |  |  |  | 4.649E-04 |  |  |  |  | KRT6A     |
| V3SVHSHC_8357111  | CIDEC     |  |  |  | 4.662E-04 |  |  |  |  | CIDEC     |
| V3SVHSHC_7270685  | PSPH      |  |  |  | 4.723E-04 |  |  |  |  | PSPH      |

|                   |              |  |  |  |           |  |  |  |  |         |
|-------------------|--------------|--|--|--|-----------|--|--|--|--|---------|
| V3SVHSHC_7823435  | DHRS4        |  |  |  | 4.747E-04 |  |  |  |  | DHRS4   |
| V3SVHSHC_10606721 | YPEL4        |  |  |  | 4.748E-04 |  |  |  |  | YPEL4   |
| V3SVHSHC_8787662  | KRAS         |  |  |  | 4.908E-04 |  |  |  |  | KRAS    |
| V3SVHSHC_5345762  | SMIM4        |  |  |  | 5.019E-04 |  |  |  |  | SMIM4   |
| V3SVHSHC_9306884  | LGMN         |  |  |  | 5.158E-04 |  |  |  |  | LGMN    |
| V3SVHSHC_4896731  | DEFB116      |  |  |  | 5.163E-04 |  |  |  |  | DEFB116 |
| V3SVHSHC_7671503  | Zglp1        |  |  |  | 5.251E-04 |  |  |  |  | Zglp1   |
| V3SVHSHC_6086051  | CLEC2A       |  |  |  | 5.429E-04 |  |  |  |  | CLEC2A  |
| V3SVHSHC_6582239  | PKN1         |  |  |  | 5.462E-04 |  |  |  |  | PKN1    |
| V3SVHSHC_10721627 | IL21R        |  |  |  | 5.496E-04 |  |  |  |  | IL21R   |
| V3SVHSHC_10632791 | ZP1          |  |  |  | 5.624E-04 |  |  |  |  | ZP1     |
| V3SVHSHC_9353018  | SDC2         |  |  |  | 5.714E-04 |  |  |  |  |         |
| V3SVHSHC_5413181  | PDDC1        |  |  |  | 5.756E-04 |  |  |  |  |         |
| V3SVHSHC_7840430  | KRBA2        |  |  |  | 5.783E-04 |  |  |  |  |         |
| V3SVHSHC_9483632  | COPS8        |  |  |  | 6.024E-04 |  |  |  |  |         |
| V3SVHSHC_9503927  | ZNF274       |  |  |  | 6.166E-04 |  |  |  |  |         |
| V3SVHSHC_6879173  | GNG3         |  |  |  | 6.481E-04 |  |  |  |  |         |
| V3SVHSHC_5860298  | DUSP11       |  |  |  | 6.583E-04 |  |  |  |  |         |
| V3SVHSHC_8016848  | LOC100653137 |  |  |  | 6.627E-04 |  |  |  |  |         |
| V3SVHSHC_5675465  | ZG16         |  |  |  | 6.736E-04 |  |  |  |  |         |
| V3SVHSHC_7182509  | LRRC19       |  |  |  | 6.859E-04 |  |  |  |  |         |
| V3SVHSHC_8366318  | SLC12A4      |  |  |  | 6.962E-04 |  |  |  |  |         |
| V3SVHSHC_7979261  | Tmem201      |  |  |  | 6.990E-04 |  |  |  |  |         |
| V3SVHSHC_10224977 | CCNC         |  |  |  | 7.031E-04 |  |  |  |  |         |
| V3SVHSHC_8920652  | INSM1        |  |  |  | 7.290E-04 |  |  |  |  |         |
| V3SVHSHC_9848612  | MSS51        |  |  |  | 7.505E-04 |  |  |  |  |         |
| V3SVHSHC_7812380  | MANEAL       |  |  |  | 7.932E-04 |  |  |  |  |         |
| V3SVHSHC_5649593  | PPIC         |  |  |  | 8.074E-04 |  |  |  |  |         |
| V3SVHSHC_9985760  | OR2L13       |  |  |  | 8.182E-04 |  |  |  |  |         |
| V3SVHSHC_9727139  | UGT2B10      |  |  |  | 8.217E-04 |  |  |  |  |         |
| V3SVHSHC_5930291  | CRISP3       |  |  |  | 8.236E-04 |  |  |  |  |         |
| V3SVHSHC_5624447  | STRN4        |  |  |  | 8.478E-04 |  |  |  |  |         |
| V3SVHSHC_6569963  | FEM1B        |  |  |  | 8.638E-04 |  |  |  |  |         |
| V3SVHSHC_8703842  | ZNF212       |  |  |  | 8.644E-04 |  |  |  |  |         |
| V3SVHSHC_5771990  | MBD4         |  |  |  | 9.310E-04 |  |  |  |  |         |
| V3SVHSHC_9793172  | GRIN3B       |  |  |  | 9.487E-04 |  |  |  |  |         |
| V3SVHSHC_8544056  | CDH6         |  |  |  | 9.640E-04 |  |  |  |  |         |
| V3SVHSHC_4721105  | LMNB1        |  |  |  | 1.025E-03 |  |  |  |  |         |
| V3SVHSHC_9413540  | HLX          |  |  |  | 1.075E-03 |  |  |  |  |         |
| V3SVHSHC_9942365  | FAM129C      |  |  |  | 1.080E-03 |  |  |  |  |         |
| V3SVHSHC_8332064  | GTF2IRD1     |  |  |  | 1.096E-03 |  |  |  |  |         |
| V3SVHSHC_9710045  | LOC101928805 |  |  |  | 1.146E-03 |  |  |  |  |         |
| V3SVHSHC_8279462  | EXOSC10      |  |  |  | 1.193E-03 |  |  |  |  |         |
| V3SVHSHC_8651471  | PIK3C2A      |  |  |  | 1.197E-03 |  |  |  |  |         |
| V3SVHSHC_7198778  | SOX4         |  |  |  | 1.206E-03 |  |  |  |  |         |
| V3SVHSHC_6161720  | DEFB103B     |  |  |  | 1.207E-03 |  |  |  |  |         |
| V3SVHSHC_5377442  | POLB         |  |  |  | 1.248E-03 |  |  |  |  |         |
| V3SVHSHC_5105588  | FOXD4L4      |  |  |  | 1.253E-03 |  |  |  |  |         |
| V3SVHSHC_4991177  | C17orf70     |  |  |  | 1.256E-03 |  |  |  |  |         |
| V3SVHSHC_7255373  | CSTA         |  |  |  | 1.257E-03 |  |  |  |  |         |
| V3SVHSHC_6575639  | AMBP         |  |  |  | 1.261E-03 |  |  |  |  |         |
| V3SVHSHC_7173269  | LOC101928879 |  |  |  | 1.270E-03 |  |  |  |  |         |
| V3SVHSHC_5119547  | E2F5         |  |  |  | 1.271E-03 |  |  |  |  |         |
| V3SVHSHC_8673482  | LANCL1       |  |  |  | 1.277E-03 |  |  |  |  |         |
| V3SVHSHC_6557093  | ZNF174       |  |  |  | 1.279E-03 |  |  |  |  |         |

|                   |              |  |  |  |           |  |  |  |  |  |
|-------------------|--------------|--|--|--|-----------|--|--|--|--|--|
| V3SVHSHC_6921974  | MAP3K2       |  |  |  | 1.305E-03 |  |  |  |  |  |
| V3SVHSHC_9828119  | CALML3       |  |  |  | 1.314E-03 |  |  |  |  |  |
| V3SVHSHC_9061727  | LOC100132004 |  |  |  | 1.349E-03 |  |  |  |  |  |
| V3SVHSHC_9627248  | RAD51D       |  |  |  | 1.361E-03 |  |  |  |  |  |
| V3SVHSHC_6904022  | FAM98B       |  |  |  | 1.367E-03 |  |  |  |  |  |
| V3SVHSHC_6344111  | ATP8B2       |  |  |  | 1.372E-03 |  |  |  |  |  |
| V3SVHSHC_7450601  | PLAU         |  |  |  | 1.379E-03 |  |  |  |  |  |
| V3SVHSHC_6544388  | GABRQ        |  |  |  | 1.401E-03 |  |  |  |  |  |
| V3SVHSHC_4785653  | C9ORF3       |  |  |  | 1.466E-03 |  |  |  |  |  |
| V3SVHSHC_10486106 | PBX2         |  |  |  | 1.606E-03 |  |  |  |  |  |
| V3SVHSHC_8766608  | CHRA1        |  |  |  | 1.677E-03 |  |  |  |  |  |
| V3SVHSHC_6934745  | Crybg3       |  |  |  | 1.683E-03 |  |  |  |  |  |
| V3SVHSHC_10678727 | DPEP1        |  |  |  | 1.753E-03 |  |  |  |  |  |
| V3SVHSHC_4980089  | IL7          |  |  |  | 1.755E-03 |  |  |  |  |  |
| V3SVHSHC_7775519  | KLHL35       |  |  |  | 1.760E-03 |  |  |  |  |  |
| V3SVHSHC_6186173  | AADACL2      |  |  |  | 1.777E-03 |  |  |  |  |  |
| V3SVHSHC_7737899  | KIAA0226L    |  |  |  | 1.879E-03 |  |  |  |  |  |
| V3SVHSHC_6403412  | TACR1        |  |  |  | 1.881E-03 |  |  |  |  |  |
| V3SVHSHC_7897355  | EDEM3        |  |  |  | 1.886E-03 |  |  |  |  |  |
| V3SVHSHC_6807959  | GATSL2       |  |  |  | 1.938E-03 |  |  |  |  |  |
| V3SVHSHC_8722322  | C22orf42     |  |  |  | 2.027E-03 |  |  |  |  |  |
| V3SVHSHC_8483336  | FAM72A       |  |  |  | 2.190E-03 |  |  |  |  |  |
| V3SVHSHC_10162442 | NUMA1        |  |  |  | 2.194E-03 |  |  |  |  |  |
| V3SVHSHC_8591939  | RASSF8       |  |  |  | 2.294E-03 |  |  |  |  |  |
| V3SVHSHC_7982198  | CDR2         |  |  |  | 2.297E-03 |  |  |  |  |  |
| V3SVHSHC_8159309  | CCND1        |  |  |  | 2.482E-03 |  |  |  |  |  |
| V3SVHSHC_9870359  | ALG8         |  |  |  | 2.496E-03 |  |  |  |  |  |
| V3SVHSHC_5658206  | MIXL1        |  |  |  | 2.509E-03 |  |  |  |  |  |
| V3SVHSHC_7394831  | SLC22A3      |  |  |  | 2.539E-03 |  |  |  |  |  |
| V3SVHSHC_10027604 | TRAF3IP2     |  |  |  | 2.647E-03 |  |  |  |  |  |
| V3SVHSHC_5764070  | PQBP1        |  |  |  | 2.668E-03 |  |  |  |  |  |
| V3SVHSHC_10385423 | BANK1        |  |  |  | 2.680E-03 |  |  |  |  |  |
| V3SVHSHC_9988136  | APOBEC3A     |  |  |  | 2.757E-03 |  |  |  |  |  |
| V3SVHSHC_7909367  | GINS1        |  |  |  | 2.816E-03 |  |  |  |  |  |
| V3SVHSHC_7216004  | RPUSD3       |  |  |  | 2.828E-03 |  |  |  |  |  |
| V3SVHSHC_5591315  | TCP11        |  |  |  | 2.931E-03 |  |  |  |  |  |
| V3SVHSHC_4985798  | C7           |  |  |  | 3.090E-03 |  |  |  |  |  |
| V3SVHSHC_10287380 | PTCH2        |  |  |  | 3.190E-03 |  |  |  |  |  |
| V3SVHSHC_10008629 | IFNB1        |  |  |  | 3.282E-03 |  |  |  |  |  |
| V3SVHSHC_5227754  | Ahnak2       |  |  |  | 3.300E-03 |  |  |  |  |  |
| V3SVHSHC_4984874  | ZNF425       |  |  |  | 3.418E-03 |  |  |  |  |  |
| V3SVHSHC_5590985  | ZNF862       |  |  |  | 3.438E-03 |  |  |  |  |  |
| V3SVHSHC_10766705 | NKG7         |  |  |  | 3.444E-03 |  |  |  |  |  |
| V3SVHSHC_5558546  | CH25H        |  |  |  | 3.519E-03 |  |  |  |  |  |
| V3SVHSHC_5436941  | CATSPER2     |  |  |  | 3.528E-03 |  |  |  |  |  |
| V3SVHSHC_6376187  | OR6B1        |  |  |  | 3.532E-03 |  |  |  |  |  |
| V3SVHSHC_9725159  | RIMBP3       |  |  |  | 3.534E-03 |  |  |  |  |  |
| V3SVHSHC_10161518 | RENB         |  |  |  | 3.561E-03 |  |  |  |  |  |
| V3SVHSHC_5402984  | RGS17        |  |  |  | 3.615E-03 |  |  |  |  |  |
| V3SVHSHC_6986489  | DCLRE1A      |  |  |  | 3.632E-03 |  |  |  |  |  |
| V3SVHSHC_8747303  | FAM167A      |  |  |  | 3.638E-03 |  |  |  |  |  |
| V3SVHSHC_6665993  | BTBD6        |  |  |  | 3.805E-03 |  |  |  |  |  |
| V3SVHSHC_7089383  | NR2C1        |  |  |  | 3.832E-03 |  |  |  |  |  |
| V3SVHSHC_4860167  | SIN3B        |  |  |  | 3.859E-03 |  |  |  |  |  |
| V3SVHSHC_8164853  | ZFAND2B      |  |  |  | 3.882E-03 |  |  |  |  |  |

|                   |           |  |  |  |           |  |  |  |  |  |
|-------------------|-----------|--|--|--|-----------|--|--|--|--|--|
| V3SVHSHC_6504590  | ZNF836    |  |  |  | 3.944E-03 |  |  |  |  |  |
| V3SVHSHC_10191086 | AGPAT1    |  |  |  | 4.044E-03 |  |  |  |  |  |
| V3SVHSHC_10132346 | CREG1     |  |  |  | 4.200E-03 |  |  |  |  |  |
| V3SVHSHC_6931610  | SOCS6     |  |  |  | 4.321E-03 |  |  |  |  |  |
| V3SVHSHC_6241613  | AGPS      |  |  |  | 4.348E-03 |  |  |  |  |  |
| V3SVHSHC_7430471  | SMARCA2   |  |  |  | 4.433E-03 |  |  |  |  |  |
| V3SVHSHC_9708527  | TM4SF4    |  |  |  | 4.446E-03 |  |  |  |  |  |
| V3SVHSHC_7296359  | OLFM2     |  |  |  | 4.453E-03 |  |  |  |  |  |
| V3SVHSHC_5723876  | ABI2      |  |  |  | 4.454E-03 |  |  |  |  |  |
| V3SVHSHC_7258673  | TRIM4     |  |  |  | 4.569E-03 |  |  |  |  |  |
| V3SVHSHC_7790798  | VCL       |  |  |  | 4.572E-03 |  |  |  |  |  |
| V3SVHSHC_7456310  | ENKUR     |  |  |  | 4.771E-03 |  |  |  |  |  |
| V3SVHSHC_6065360  | FAU       |  |  |  | 4.829E-03 |  |  |  |  |  |
| V3SVHSHC_6274217  | DLX5      |  |  |  | 4.835E-03 |  |  |  |  |  |
| V3SVHSHC_10518446 | DTD1      |  |  |  | 4.927E-03 |  |  |  |  |  |
| V3SVHSHC_4773707  | GCDH      |  |  |  | 4.936E-03 |  |  |  |  |  |
| V3SVHSHC_7044404  | HOXC5     |  |  |  | 4.969E-03 |  |  |  |  |  |
| V3SVHSHC_9047636  | UBXN2B    |  |  |  | 4.972E-03 |  |  |  |  |  |
| V3SVHSHC_9584975  | CHRM5     |  |  |  | 5.050E-03 |  |  |  |  |  |
| V3SVHSHC_4844657  | SNX6      |  |  |  | 5.064E-03 |  |  |  |  |  |
| V3SVHSHC_8432021  | ARSI      |  |  |  | 5.180E-03 |  |  |  |  |  |
| V3SVHSHC_4695002  | AGXT2     |  |  |  | 5.321E-03 |  |  |  |  |  |
| V3SVHSHC_8678597  | RNASEH2B  |  |  |  | 5.469E-03 |  |  |  |  |  |
| V3SVHSHC_5282402  | SLC9C1    |  |  |  | 5.499E-03 |  |  |  |  |  |
| V3SVHSHC_7750967  | CCT4      |  |  |  | 5.647E-03 |  |  |  |  |  |
| V3SVHSHC_7811456  | GTF2IRD2B |  |  |  | 5.767E-03 |  |  |  |  |  |
| V3SVHSHC_9117101  | BRMS1     |  |  |  | 5.821E-03 |  |  |  |  |  |
| V3SVHSHC_6575177  | CHMP5     |  |  |  | 5.937E-03 |  |  |  |  |  |
| V3SVHSHC_5083709  | CCND2     |  |  |  | 5.948E-03 |  |  |  |  |  |
| V3SVHSHC_9085685  | DUS3L     |  |  |  | 5.986E-03 |  |  |  |  |  |
| V3SVHSHC_4878086  | PCDHGA9   |  |  |  | 6.008E-03 |  |  |  |  |  |
| V3SVHSHC_8455715  | OR2B2     |  |  |  | 6.029E-03 |  |  |  |  |  |
| V3SVHSHC_5288375  | DLG5      |  |  |  | 6.120E-03 |  |  |  |  |  |
| V3SVHSHC_7789181  | FEZF1     |  |  |  | 6.134E-03 |  |  |  |  |  |
| V3SVHSHC_9048923  | SLC25A10  |  |  |  | 6.161E-03 |  |  |  |  |  |
| V3SVHSHC_5981276  | TRIM33    |  |  |  | 6.347E-03 |  |  |  |  |  |
| V3SVHSHC_8083013  | LALBA     |  |  |  | 6.377E-03 |  |  |  |  |  |
| V3SVHSHC_4842215  | RPS6KB1   |  |  |  | 6.491E-03 |  |  |  |  |  |
| V3SVHSHC_7881647  | LILRB5    |  |  |  | 6.545E-03 |  |  |  |  |  |
| V3SVHSHC_7945898  | CBR3      |  |  |  | 6.673E-03 |  |  |  |  |  |
| V3SVHSHC_10479176 | CD3D      |  |  |  | 6.812E-03 |  |  |  |  |  |
| V3SVHSHC_7259993  | DDX60L    |  |  |  | 6.813E-03 |  |  |  |  |  |
| V3SVHSHC_9310283  | RNF38     |  |  |  | 7.007E-03 |  |  |  |  |  |
| V3SVHSHC_4904222  | DAAM1     |  |  |  | 7.143E-03 |  |  |  |  |  |
| V3SVHSHC_5838386  | PHF2      |  |  |  | 7.434E-03 |  |  |  |  |  |
| V3SVHSHC_8721695  | COX14     |  |  |  | 7.520E-03 |  |  |  |  |  |
| V3SVHSHC_9506072  | POU4F3    |  |  |  | 7.526E-03 |  |  |  |  |  |
| V3SVHSHC_4716485  | ANKMY1    |  |  |  | 7.624E-03 |  |  |  |  |  |
| V3SVHSHC_10524584 | ZNF445    |  |  |  | 7.642E-03 |  |  |  |  |  |
| V3SVHSHC_10766078 | PACS1     |  |  |  | 7.663E-03 |  |  |  |  |  |
| V3SVHSHC_4657415  | FOXF2     |  |  |  | 7.714E-03 |  |  |  |  |  |
| V3SVHSHC_9492575  | TRIM52    |  |  |  | 7.719E-03 |  |  |  |  |  |
| V3SVHSHC_7184291  | DNAJB7    |  |  |  | 7.761E-03 |  |  |  |  |  |
| V3SVHSHC_5563595  | ABCD2     |  |  |  | 7.868E-03 |  |  |  |  |  |
| V3SVHSHC_10377635 | TMPRSS13  |  |  |  | 7.975E-03 |  |  |  |  |  |



|                   |              |  |  |  |           |  |  |  |  |  |
|-------------------|--------------|--|--|--|-----------|--|--|--|--|--|
| V3SVHSHC_8888840  | LCN2         |  |  |  | 7.993E-03 |  |  |  |  |  |
| V3SVHSHC_6963983  | IPMK         |  |  |  | 8.081E-03 |  |  |  |  |  |
| V3SVHSHC_7753871  | GPR146       |  |  |  | 8.132E-03 |  |  |  |  |  |
| V3SVHSHC_8187260  | PHKG1        |  |  |  | 8.254E-03 |  |  |  |  |  |
| V3SVHSHC_7265603  | CYP4V2       |  |  |  | 8.307E-03 |  |  |  |  |  |
| V3SVHSHC_9915338  | NEUROD6      |  |  |  | 8.344E-03 |  |  |  |  |  |
| V3SVHSHC_10624673 | SNX1         |  |  |  | 8.387E-03 |  |  |  |  |  |
| V3SVHSHC_6087470  | FAM96A       |  |  |  | 8.422E-03 |  |  |  |  |  |
| V3SVHSHC_8010809  | CFP          |  |  |  | 8.575E-03 |  |  |  |  |  |
| V3SVHSHC_8114198  | TIMM22       |  |  |  | 8.771E-03 |  |  |  |  |  |
| V3SVHSHC_10681037 | AKAP2        |  |  |  | 8.835E-03 |  |  |  |  |  |
| V3SVHSHC_6224915  | ZNF445       |  |  |  | 8.938E-03 |  |  |  |  |  |
| V3SVHSHC_6966623  | REM1         |  |  |  | 9.044E-03 |  |  |  |  |  |
| V3SVHSHC_8367143  | PCDP1        |  |  |  | 9.129E-03 |  |  |  |  |  |
| V3SVHSHC_5630387  | C19orf33     |  |  |  | 9.146E-03 |  |  |  |  |  |
| V3SVHSHC_8955830  | GLTSCR1L     |  |  |  | 9.186E-03 |  |  |  |  |  |
| V3SVHSHC_7341965  | SAP30        |  |  |  | 9.211E-03 |  |  |  |  |  |
| V3SVHSHC_6547490  | NDUFAB1      |  |  |  | 9.273E-03 |  |  |  |  |  |
| V3SVHSHC_9777695  | LOC402269    |  |  |  | 9.388E-03 |  |  |  |  |  |
| V3SVHSHC_10063079 | ADAMTSL1     |  |  |  | 9.551E-03 |  |  |  |  |  |
| V3SVHSHC_6931313  | GGT2         |  |  |  | 9.601E-03 |  |  |  |  |  |
| V3SVHSHC_5615306  | RASIP1       |  |  |  | 9.748E-03 |  |  |  |  |  |
| V3SVHSHC_5482052  | SLC39A10     |  |  |  | 9.840E-03 |  |  |  |  |  |
| V3SVHSHC_8922830  | C7orf71      |  |  |  | 9.907E-03 |  |  |  |  |  |
| V3SVHSHC_10283651 | SMOC1        |  |  |  | 9.922E-03 |  |  |  |  |  |
| V3SVHSHC_10758686 | TMEM35       |  |  |  | 9.943E-03 |  |  |  |  |  |
| V3SVHSHC_10144193 | KCNJ9        |  |  |  | 1.035E-02 |  |  |  |  |  |
| V3SVHSHC_10042124 | SH3BP5       |  |  |  | 1.052E-02 |  |  |  |  |  |
| V3SVHSHC_9781028  | GNG4         |  |  |  | 1.054E-02 |  |  |  |  |  |
| V3SVHSHC_10415156 | SYT1         |  |  |  | 1.092E-02 |  |  |  |  |  |
| V3SVHSHC_5084402  | ZNF391       |  |  |  | 1.120E-02 |  |  |  |  |  |
| V3SVHSHC_8183993  | CIITA        |  |  |  | 1.165E-02 |  |  |  |  |  |
| V3SVHSHC_10529039 | SHISA2       |  |  |  | 1.172E-02 |  |  |  |  |  |
| V3SVHSHC_8993252  | PCOLCE       |  |  |  | 1.175E-02 |  |  |  |  |  |
| V3SVHSHC_5662892  | PCDHGA1      |  |  |  | 1.177E-02 |  |  |  |  |  |
| V3SVHSHC_9495941  | LRRN2        |  |  |  | 1.187E-02 |  |  |  |  |  |
| V3SVHSHC_7260884  | DAB2IP       |  |  |  | 1.226E-02 |  |  |  |  |  |
| V3SVHSHC_5882309  | STXBP3       |  |  |  | 1.246E-02 |  |  |  |  |  |
| V3SVHSHC_7395953  | TLR10        |  |  |  | 1.274E-02 |  |  |  |  |  |
| V3SVHSHC_6371501  | ST6GAL1      |  |  |  | 1.308E-02 |  |  |  |  |  |
| V3SVHSHC_7784000  | ANKAR        |  |  |  | 1.312E-02 |  |  |  |  |  |
| V3SVHSHC_7866368  | AIFM3        |  |  |  | 1.317E-02 |  |  |  |  |  |
| V3SVHSHC_7895276  | VPS45        |  |  |  | 1.320E-02 |  |  |  |  |  |
| V3SVHSHC_8775980  | TMEM259      |  |  |  | 1.339E-02 |  |  |  |  |  |
| V3SVHSHC_5937683  | TXNL4A       |  |  |  | 1.340E-02 |  |  |  |  |  |
| V3SVHSHC_7515413  | CASP2        |  |  |  | 1.363E-02 |  |  |  |  |  |
| V3SVHSHC_10630052 | LARGE        |  |  |  | 1.372E-02 |  |  |  |  |  |
| V3SVHSHC_8977742  | ITGB1BP2     |  |  |  | 1.405E-02 |  |  |  |  |  |
| V3SVHSHC_8110634  | RWDD4        |  |  |  | 1.433E-02 |  |  |  |  |  |
| V3SVHSHC_8425058  | PHF14        |  |  |  | 1.439E-02 |  |  |  |  |  |
| V3SVHSHC_7885442  | RHNO1        |  |  |  | 1.451E-02 |  |  |  |  |  |
| V3SVHSHC_8950682  | IL17A        |  |  |  | 1.451E-02 |  |  |  |  |  |
| V3SVHSHC_5876369  | CR2          |  |  |  | 1.505E-02 |  |  |  |  |  |
| V3SVHSHC_7645697  | KPNA4        |  |  |  | 1.529E-02 |  |  |  |  |  |
| V3SVHSHC_10429511 | LOC101930125 |  |  |  | 1.538E-02 |  |  |  |  |  |

|                   |              |  |  |  |           |  |  |  |  |  |
|-------------------|--------------|--|--|--|-----------|--|--|--|--|--|
| V3SVHSHC_6894551  | HHIPL2       |  |  |  | 1.560E-02 |  |  |  |  |  |
| V3SVHSHC_9575702  | CDH7         |  |  |  | 1.581E-02 |  |  |  |  |  |
| V3SVHSHC_8621837  | CCDC102A     |  |  |  | 1.601E-02 |  |  |  |  |  |
| V3SVHSHC_6524555  | AIP          |  |  |  | 1.654E-02 |  |  |  |  |  |
| V3SVHSHC_5652563  | GNB5         |  |  |  | 1.677E-02 |  |  |  |  |  |
| V3SVHSHC_7514984  | LHX1         |  |  |  | 1.683E-02 |  |  |  |  |  |
| V3SVHSHC_10755056 | RYK          |  |  |  | 1.690E-02 |  |  |  |  |  |
| V3SVHSHC_5709554  | RBM5         |  |  |  | 1.752E-02 |  |  |  |  |  |
| V3SVHSHC_8949098  | LPL          |  |  |  | 1.763E-02 |  |  |  |  |  |
| V3SVHSHC_5352494  | FAM171A1     |  |  |  | 1.781E-02 |  |  |  |  |  |
| V3SVHSHC_9271277  | TRPM7        |  |  |  | 1.783E-02 |  |  |  |  |  |
| V3SVHSHC_8538611  | MLPH         |  |  |  | 1.816E-02 |  |  |  |  |  |
| V3SVHSHC_8028299  | NAT14        |  |  |  | 1.825E-02 |  |  |  |  |  |
| V3SVHSHC_7601774  | NTN4         |  |  |  | 1.874E-02 |  |  |  |  |  |
| V3SVHSHC_7774925  | ZNF609       |  |  |  | 1.890E-02 |  |  |  |  |  |
| V3SVHSHC_9386150  | DIAPH2       |  |  |  | 1.906E-02 |  |  |  |  |  |
| V3SVHSHC_6385790  | ST3GAL3      |  |  |  | 1.908E-02 |  |  |  |  |  |
| V3SVHSHC_9487823  | ADNP         |  |  |  | 2.033E-02 |  |  |  |  |  |
| V3SVHSHC_9260981  | LOC101927594 |  |  |  | 2.056E-02 |  |  |  |  |  |
| V3SVHSHC_9632858  | PTTG2        |  |  |  | 2.068E-02 |  |  |  |  |  |
| V3SVHSHC_6553100  | RSC1A1       |  |  |  | 2.155E-02 |  |  |  |  |  |
| V3SVHSHC_10292231 | Ucma         |  |  |  | 2.177E-02 |  |  |  |  |  |
| V3SVHSHC_6079781  | C20orf62     |  |  |  | 2.183E-02 |  |  |  |  |  |
| V3SVHSHC_7549139  | FST          |  |  |  | 2.226E-02 |  |  |  |  |  |
| V3SVHSHC_10233986 | GLYR1        |  |  |  | 2.227E-02 |  |  |  |  |  |
| V3SVHSHC_9153071  | TBC1D10A     |  |  |  | 2.239E-02 |  |  |  |  |  |
| V3SVHSHC_10624079 | RNASE8       |  |  |  | 2.262E-02 |  |  |  |  |  |
| V3SVHSHC_6655895  | ATP5L        |  |  |  | 2.269E-02 |  |  |  |  |  |
| V3SVHSHC_8427731  | SERPINH1     |  |  |  | 2.272E-02 |  |  |  |  |  |
| V3SVHSHC_9956060  | STK4         |  |  |  | 2.298E-02 |  |  |  |  |  |
| V3SVHSHC_10075949 | Fam154b      |  |  |  | 2.302E-02 |  |  |  |  |  |
| V3SVHSHC_8293289  | SFTPD        |  |  |  | 2.382E-02 |  |  |  |  |  |
| V3SVHSHC_4903397  | DMP1         |  |  |  | 2.425E-02 |  |  |  |  |  |
| V3SVHSHC_8945798  | NDST2        |  |  |  | 2.442E-02 |  |  |  |  |  |
| V3SVHSHC_8958569  | FAM185A      |  |  |  | 2.493E-02 |  |  |  |  |  |
| V3SVHSHC_9821255  | FAM71E2      |  |  |  | 2.541E-02 |  |  |  |  |  |
| V3SVHSHC_8645432  | POTEB        |  |  |  | 2.545E-02 |  |  |  |  |  |
| V3SVHSHC_7975994  | DMBT1        |  |  |  | 2.571E-02 |  |  |  |  |  |
| V3SVHSHC_6082652  | MAMDC4       |  |  |  | 2.610E-02 |  |  |  |  |  |
| V3SVHSHC_10183562 | ZFY          |  |  |  | 2.641E-02 |  |  |  |  |  |
| V3SVHSHC_5846273  | EIF2AK3      |  |  |  | 2.677E-02 |  |  |  |  |  |
| V3SVHSHC_10242698 | NEDD4        |  |  |  | 2.698E-02 |  |  |  |  |  |
| V3SVHSHC_6820103  | C5orf60      |  |  |  | 2.746E-02 |  |  |  |  |  |
| V3SVHSHC_7379750  | SEPT14       |  |  |  | 2.752E-02 |  |  |  |  |  |
| V3SVHSHC_10016417 | NRD1         |  |  |  | 2.755E-02 |  |  |  |  |  |
| V3SVHSHC_9503432  | KDM5C        |  |  |  | 2.783E-02 |  |  |  |  |  |
| V3SVHSHC_5110967  | NMRAL1       |  |  |  | 2.823E-02 |  |  |  |  |  |
| V3SVHSHC_6900656  | ITGB1BP1     |  |  |  | 2.853E-02 |  |  |  |  |  |
| V3SVHSHC_9392453  | CTGF         |  |  |  | 2.865E-02 |  |  |  |  |  |
| V3SVHSHC_8997014  | OBFC1        |  |  |  | 2.903E-02 |  |  |  |  |  |
| V3SVHSHC_9027143  | FEZF2        |  |  |  | 2.928E-02 |  |  |  |  |  |
| V3SVHSHC_9111821  | SIGMAR1      |  |  |  | 2.997E-02 |  |  |  |  |  |
| V3SVHSHC_4995302  | SLC10A4      |  |  |  | 3.034E-02 |  |  |  |  |  |
| V3SVHSHC_5111198  | ITM2B        |  |  |  | 3.049E-02 |  |  |  |  |  |
| V3SVHSHC_8159243  | CDC42EP3     |  |  |  | 3.115E-02 |  |  |  |  |  |

|                   |              |  |  |  |           |  |  |  |  |  |
|-------------------|--------------|--|--|--|-----------|--|--|--|--|--|
| V3SVHSHC_8972099  | FAM171A2     |  |  |  | 3.129E-02 |  |  |  |  |  |
| V3SVHSHC_9299030  | F12          |  |  |  | 3.200E-02 |  |  |  |  |  |
| V3SVHSHC_7932467  | NDRG3        |  |  |  | 3.250E-02 |  |  |  |  |  |
| V3SVHSHC_10114526 | WNT6         |  |  |  | 3.269E-02 |  |  |  |  |  |
| V3SVHSHC_9975266  | C6orf183     |  |  |  | 3.381E-02 |  |  |  |  |  |
| V3SVHSHC_9956753  | UQCC2        |  |  |  | 3.384E-02 |  |  |  |  |  |
| V3SVHSHC_9470465  | OR51B4       |  |  |  | 3.390E-02 |  |  |  |  |  |
| V3SVHSHC_9339455  | ATP5G3       |  |  |  | 3.411E-02 |  |  |  |  |  |
| V3SVHSHC_5080409  | TNFAIP2      |  |  |  | 3.429E-02 |  |  |  |  |  |
| V3SVHSHC_9198809  | LOC100287294 |  |  |  | 3.439E-02 |  |  |  |  |  |
| V3SVHSHC_4747769  | PALM2        |  |  |  | 3.489E-02 |  |  |  |  |  |
| V3SVHSHC_5825879  | ADAMTSL1     |  |  |  | 3.548E-02 |  |  |  |  |  |
| V3SVHSHC_4947947  | COX7B        |  |  |  | 3.584E-02 |  |  |  |  |  |
| V3SVHSHC_5231483  | PBX4         |  |  |  | 3.652E-02 |  |  |  |  |  |
| V3SVHSHC_9431228  | MMGT1        |  |  |  | 3.654E-02 |  |  |  |  |  |
| V3SVHSHC_6488717  | CYR61        |  |  |  | 3.665E-02 |  |  |  |  |  |
| V3SVHSHC_9871118  | TEX264       |  |  |  | 3.672E-02 |  |  |  |  |  |
| V3SVHSHC_9712322  | PADI3        |  |  |  | 3.686E-02 |  |  |  |  |  |
| V3SVHSHC_10077665 | PELI2        |  |  |  | 3.708E-02 |  |  |  |  |  |
| V3SVHSHC_10736114 | VWA5A        |  |  |  | 3.764E-02 |  |  |  |  |  |
| V3SVHSHC_5992760  | CDC6         |  |  |  | 3.776E-02 |  |  |  |  |  |
| V3SVHSHC_6637283  | CCDC158      |  |  |  | 3.824E-02 |  |  |  |  |  |
| V3SVHSHC_9654242  | TLE6         |  |  |  | 3.857E-02 |  |  |  |  |  |
| V3SVHSHC_10464194 | LMO4         |  |  |  | 3.906E-02 |  |  |  |  |  |
| V3SVHSHC_8491652  | ZEB2         |  |  |  | 3.934E-02 |  |  |  |  |  |
| V3SVHSHC_10653944 | ACTN3        |  |  |  | 3.951E-02 |  |  |  |  |  |
| V3SVHSHC_10216331 | ZNF280D      |  |  |  | 3.972E-02 |  |  |  |  |  |
| V3SVHSHC_7007246  | TACC1        |  |  |  | 3.986E-02 |  |  |  |  |  |
| V3SVHSHC_4693550  | Krtdap       |  |  |  | 4.042E-02 |  |  |  |  |  |
| V3SVHSHC_8167856  | TCERG1L      |  |  |  | 4.063E-02 |  |  |  |  |  |
| V3SVHSHC_7246958  | DSCR3        |  |  |  | 4.079E-02 |  |  |  |  |  |
| V3SVHSHC_5839013  | ADH1B        |  |  |  | 4.130E-02 |  |  |  |  |  |
| V3SVHSHC_9602366  | PINK1        |  |  |  | 4.137E-02 |  |  |  |  |  |
| V3SVHSHC_5010911  | ART1         |  |  |  | 4.168E-02 |  |  |  |  |  |
| V3SVHSHC_10559333 | CHN2         |  |  |  | 4.196E-02 |  |  |  |  |  |
| V3SVHSHC_7607252  | NEK4         |  |  |  | 4.213E-02 |  |  |  |  |  |
| V3SVHSHC_9532604  | ACO1         |  |  |  | 4.220E-02 |  |  |  |  |  |
| V3SVHSHC_9634574  | TRIOBP       |  |  |  | 4.252E-02 |  |  |  |  |  |
| V3SVHSHC_6033911  | SMIM6        |  |  |  | 4.266E-02 |  |  |  |  |  |
| V3SVHSHC_5831060  | TLR9         |  |  |  | 4.342E-02 |  |  |  |  |  |
| V3SVHSHC_9750866  | SIX1         |  |  |  | 4.409E-02 |  |  |  |  |  |
| V3SVHSHC_10547750 | BRSK2        |  |  |  | 4.431E-02 |  |  |  |  |  |
| V3SVHSHC_10407170 | ZNF136       |  |  |  | 4.518E-02 |  |  |  |  |  |
| V3SVHSHC_10238540 | OR2F1        |  |  |  | 4.747E-02 |  |  |  |  |  |
| V3SVHSHC_4967087  | STK40        |  |  |  | 4.783E-02 |  |  |  |  |  |
| V3SVHSHC_8049881  | RAMP3        |  |  |  | 4.859E-02 |  |  |  |  |  |
| V3SVHSHC_5209241  | ARHGDIG      |  |  |  | 4.950E-02 |  |  |  |  |  |
| V3SVHSHC_4679723  | DEFB132      |  |  |  | 4.995E-02 |  |  |  |  |  |
| V3SVHSHC_5137202  | KAT5         |  |  |  | 5.032E-02 |  |  |  |  |  |
| V3SVHSHC_9410042  | ECI1         |  |  |  | 5.123E-02 |  |  |  |  |  |
| V3SVHSHC_5732786  | ATP6AP2      |  |  |  | 5.145E-02 |  |  |  |  |  |
| V3SVHSHC_10591343 | ALDH1A2      |  |  |  | 5.231E-02 |  |  |  |  |  |
| V3SVHSHC_10593983 | PTGES        |  |  |  | 5.298E-02 |  |  |  |  |  |
| V3SVHSHC_9073970  | RPAP2        |  |  |  | 5.412E-02 |  |  |  |  |  |
| V3SVHSHC_7751165  | CPAMD8       |  |  |  | 5.442E-02 |  |  |  |  |  |

|                   |              |  |  |  |           |  |  |  |  |  |
|-------------------|--------------|--|--|--|-----------|--|--|--|--|--|
| V3SVHSHC_7783109  | PDE1B        |  |  |  | 5.476E-02 |  |  |  |  |  |
| V3SVHSHC_7621211  | FAM43B       |  |  |  | 5.491E-02 |  |  |  |  |  |
| V3SVHSHC_8963354  | NME1-NME2    |  |  |  | 5.530E-02 |  |  |  |  |  |
| V3SVHSHC_8918540  | USP44        |  |  |  | 5.536E-02 |  |  |  |  |  |
| V3SVHSHC_8935271  | CAMK2A       |  |  |  | 5.540E-02 |  |  |  |  |  |
| V3SVHSHC_10247813 | CMTM5        |  |  |  | 5.768E-02 |  |  |  |  |  |
| V3SVHSHC_9157295  | TGIF2        |  |  |  | 5.776E-02 |  |  |  |  |  |
| V3SVHSHC_5514755  | NDST2        |  |  |  | 5.882E-02 |  |  |  |  |  |
| V3SVHSHC_8634113  | FAM46D       |  |  |  | 5.907E-02 |  |  |  |  |  |
| V3SVHSHC_10129574 | RPL7L1       |  |  |  | 5.912E-02 |  |  |  |  |  |
| V3SVHSHC_9256625  | CLEC11A      |  |  |  | 5.928E-02 |  |  |  |  |  |
| V3SVHSHC_4697312  | KRTAP20-2    |  |  |  | 6.082E-02 |  |  |  |  |  |
| V3SVHSHC_6975269  | LEF1         |  |  |  | 6.122E-02 |  |  |  |  |  |
| V3SVHSHC_8098028  | CORO2B       |  |  |  | 6.198E-02 |  |  |  |  |  |
| V3SVHSHC_6270323  | TRIM71       |  |  |  | 6.281E-02 |  |  |  |  |  |
| V3SVHSHC_8540855  | PLCB2        |  |  |  | 6.409E-02 |  |  |  |  |  |
| V3SVHSHC_6179078  | TBL3         |  |  |  | 6.523E-02 |  |  |  |  |  |
| V3SVHSHC_9662492  | DHX29        |  |  |  | 6.540E-02 |  |  |  |  |  |
| V3SVHSHC_10311404 | ZNF670       |  |  |  | 6.577E-02 |  |  |  |  |  |
| V3SVHSHC_6447500  | OR52M1       |  |  |  | 6.684E-02 |  |  |  |  |  |
| V3SVHSHC_9919034  | CARS         |  |  |  | 6.695E-02 |  |  |  |  |  |
| V3SVHSHC_7342526  | CSNK1E       |  |  |  | 6.776E-02 |  |  |  |  |  |
| V3SVHSHC_7075193  | SEMA4F       |  |  |  | 6.803E-02 |  |  |  |  |  |
| V3SVHSHC_6936032  | PARP6        |  |  |  | 6.840E-02 |  |  |  |  |  |
| V3SVHSHC_8245373  | C11orf57     |  |  |  | 6.976E-02 |  |  |  |  |  |
| V3SVHSHC_6433079  | C1orf137     |  |  |  | 7.001E-02 |  |  |  |  |  |
| V3SVHSHC_7471853  | OR4S1        |  |  |  | 7.044E-02 |  |  |  |  |  |
| V3SVHSHC_9501287  | TTLL2        |  |  |  | 7.100E-02 |  |  |  |  |  |
| V3SVHSHC_5413049  | PSMA3        |  |  |  | 7.127E-02 |  |  |  |  |  |
| V3SVHSHC_5875082  | ZHX1         |  |  |  | 7.127E-02 |  |  |  |  |  |
| V3SVHSHC_8999786  | CWF19L2      |  |  |  | 7.129E-02 |  |  |  |  |  |
| V3SVHSHC_7541648  | CD96         |  |  |  | 7.220E-02 |  |  |  |  |  |
| V3SVHSHC_7540526  | LOC101927910 |  |  |  | 7.239E-02 |  |  |  |  |  |
| V3SVHSHC_4951280  | QPRT         |  |  |  | 7.273E-02 |  |  |  |  |  |
| V3SVHSHC_6443705  | ACN9         |  |  |  | 7.346E-02 |  |  |  |  |  |
| V3SVHSHC_5905376  | CCL20        |  |  |  | 7.390E-02 |  |  |  |  |  |
| V3SVHSHC_8115947  | Crybg3       |  |  |  | 7.478E-02 |  |  |  |  |  |
| V3SVHSHC_5359853  | VWA9         |  |  |  | 7.512E-02 |  |  |  |  |  |
| V3SVHSHC_6415358  | PRPF38A      |  |  |  | 7.622E-02 |  |  |  |  |  |
| V3SVHSHC_5205479  | RLN3         |  |  |  | 7.638E-02 |  |  |  |  |  |
| V3SVHSHC_7839473  | KRT6B        |  |  |  | 7.741E-02 |  |  |  |  |  |
| V3SVHSHC_9268505  | CSDE1        |  |  |  | 7.752E-02 |  |  |  |  |  |
| V3SVHSHC_7491554  | PDCD2L       |  |  |  | 7.774E-02 |  |  |  |  |  |
| V3SVHSHC_10130168 | GATA4        |  |  |  | 7.784E-02 |  |  |  |  |  |
| V3SVHSHC_9323054  | SMCO3        |  |  |  | 7.831E-02 |  |  |  |  |  |
| V3SVHSHC_6277187  | MYC          |  |  |  | 7.845E-02 |  |  |  |  |  |
| V3SVHSHC_7263161  | WASL         |  |  |  | 7.934E-02 |  |  |  |  |  |
| V3SVHSHC_4886105  | AGO2         |  |  |  | 7.976E-02 |  |  |  |  |  |
| V3SVHSHC_10467296 | NDUFS3       |  |  |  | 8.036E-02 |  |  |  |  |  |
| V3SVHSHC_10781588 | BTNL2        |  |  |  | 8.112E-02 |  |  |  |  |  |
| V3SVHSHC_9998465  | Mettl14      |  |  |  | 8.170E-02 |  |  |  |  |  |
| V3SVHSHC_6972398  | TMSB4Y       |  |  |  | 8.369E-02 |  |  |  |  |  |
| V3SVHSHC_5503700  | MYH9         |  |  |  | 8.370E-02 |  |  |  |  |  |
| V3SVHSHC_10276523 | DSTN         |  |  |  | 8.371E-02 |  |  |  |  |  |
| V3SVHSHC_10834850 | SLC25A52     |  |  |  | 8.484E-02 |  |  |  |  |  |

|                   |              |  |  |  |           |  |  |  |  |  |
|-------------------|--------------|--|--|--|-----------|--|--|--|--|--|
| V3SVHSHC_7692821  | LARP4        |  |  |  | 8.520E-02 |  |  |  |  |  |
| V3SVHSHC_7114529  | H3F3B        |  |  |  | 8.529E-02 |  |  |  |  |  |
| V3SVHSHC_4759385  | PRKD3        |  |  |  | 8.549E-02 |  |  |  |  |  |
| V3SVHSHC_10141685 | GDNF         |  |  |  | 8.602E-02 |  |  |  |  |  |
| V3SVHSHC_4792187  | PITPNB       |  |  |  | 8.683E-02 |  |  |  |  |  |
| V3SVHSHC_6256232  | PAK6         |  |  |  | 8.697E-02 |  |  |  |  |  |
| V3SVHSHC_8252963  | USP9Y        |  |  |  | 8.715E-02 |  |  |  |  |  |
| V3SVHSHC_4823042  | KCNV2        |  |  |  | 8.733E-02 |  |  |  |  |  |
| V3SVHSHC_6294149  | ZNF704       |  |  |  | 8.803E-02 |  |  |  |  |  |
| V3SVHSHC_4955042  | TMEM106C     |  |  |  | 8.819E-02 |  |  |  |  |  |
| V3SVHSHC_8817593  | SCRN2        |  |  |  | 8.822E-02 |  |  |  |  |  |
| V3SVHSHC_6305402  | UBE4B        |  |  |  | 8.847E-02 |  |  |  |  |  |
| V3SVHSHC_9641372  | ADH6         |  |  |  | 8.934E-02 |  |  |  |  |  |
| V3SVHSHC_9447035  | BAG5         |  |  |  | 8.945E-02 |  |  |  |  |  |
| V3SVHSHC_4875050  | LYPD2        |  |  |  | 8.965E-02 |  |  |  |  |  |
| V3SVHSHC_7842806  | ARID3B       |  |  |  | 8.966E-02 |  |  |  |  |  |
| V3SVHSHC_10389647 | TRAPP C9     |  |  |  | 9.012E-02 |  |  |  |  |  |
| V3SVHSHC_6566762  | PAX3         |  |  |  | 9.022E-02 |  |  |  |  |  |
| V3SVHSHC_7794593  | DCSTAMP      |  |  |  | 9.251E-02 |  |  |  |  |  |
| V3SVHSHC_5228513  | TUBB2B       |  |  |  | 9.429E-02 |  |  |  |  |  |
| V3SVHSHC_6978239  | RPL35        |  |  |  | 9.446E-02 |  |  |  |  |  |
| V3SVHSHC_7372853  | F3           |  |  |  | 9.559E-02 |  |  |  |  |  |
| V3SVHSHC_6003551  | RAPSN        |  |  |  | 9.624E-02 |  |  |  |  |  |
| V3SVHSHC_4728134  | POLR3A       |  |  |  | 9.746E-02 |  |  |  |  |  |
| V3SVHSHC_6674771  | CSNK1D       |  |  |  | 9.816E-02 |  |  |  |  |  |
| V3SVHSHC_6538910  | PRDM1        |  |  |  | 9.873E-02 |  |  |  |  |  |
| V3SVHSHC_5907224  | GCM2         |  |  |  | 9.988E-02 |  |  |  |  |  |
| V3SVHSHC_5859704  | C12orf73     |  |  |  | 1.013E-01 |  |  |  |  |  |
| V3SVHSHC_10370441 | LOC101929536 |  |  |  | 1.025E-01 |  |  |  |  |  |
| V3SVHSHC_10256030 | AGXT         |  |  |  | 1.031E-01 |  |  |  |  |  |
| V3SVHSHC_6967910  | TIFAB        |  |  |  | 1.042E-01 |  |  |  |  |  |
| V3SVHSHC_7487627  | RPGR         |  |  |  | 1.045E-01 |  |  |  |  |  |
| V3SVHSHC_6171686  | KPNA7        |  |  |  | 1.046E-01 |  |  |  |  |  |
| V3SVHSHC_9783635  | CXorf30      |  |  |  | 1.049E-01 |  |  |  |  |  |
| V3SVHSHC_9517391  | NDNL2        |  |  |  | 1.050E-01 |  |  |  |  |  |
| V3SVHSHC_5793176  | CLCN6        |  |  |  | 1.053E-01 |  |  |  |  |  |
| V3SVHSHC_6886070  | AFF4         |  |  |  | 1.053E-01 |  |  |  |  |  |
| V3SVHSHC_4976756  | MIER3        |  |  |  | 1.062E-01 |  |  |  |  |  |
| V3SVHSHC_7786706  | KRTAP29-1    |  |  |  | 1.064E-01 |  |  |  |  |  |
| V3SVHSHC_6409748  | RRH          |  |  |  | 1.073E-01 |  |  |  |  |  |
| V3SVHSHC_7979921  | SEPHS1       |  |  |  | 1.097E-01 |  |  |  |  |  |
| V3SVHSHC_10651667 | BMX          |  |  |  | 1.106E-01 |  |  |  |  |  |
| V3SVHSHC_7376153  | TMEM131      |  |  |  | 1.140E-01 |  |  |  |  |  |
| V3SVHSHC_7518977  | TROVE2       |  |  |  | 1.170E-01 |  |  |  |  |  |
| V3SVHSHC_6989690  | MKNK2        |  |  |  | 1.175E-01 |  |  |  |  |  |
| V3SVHSHC_4980419  | TXNRD2       |  |  |  | 1.180E-01 |  |  |  |  |  |
| V3SVHSHC_6561647  | IFITM3       |  |  |  | 1.182E-01 |  |  |  |  |  |
| V3SVHSHC_5959166  | KIF20B       |  |  |  | 1.182E-01 |  |  |  |  |  |
| V3SVHSHC_7296062  | SLC37A1      |  |  |  | 1.187E-01 |  |  |  |  |  |
| V3SVHSHC_5966723  | TMPRSS11D    |  |  |  | 1.205E-01 |  |  |  |  |  |
| V3SVHSHC_6566564  | EPB41L2      |  |  |  | 1.209E-01 |  |  |  |  |  |
| V3SVHSHC_7756082  | VMO1         |  |  |  | 1.215E-01 |  |  |  |  |  |
| V3SVHSHC_8929694  | DLL1         |  |  |  | 1.221E-01 |  |  |  |  |  |
| V3SVHSHC_6089153  | Tomm20l      |  |  |  | 1.237E-01 |  |  |  |  |  |
| V3SVHSHC_5598047  | ATAD5        |  |  |  | 1.237E-01 |  |  |  |  |  |

|                   |              |  |  |  |           |  |  |  |  |  |
|-------------------|--------------|--|--|--|-----------|--|--|--|--|--|
| V3SVHSHC_5238017  | PDE12        |  |  |  | 1.258E-01 |  |  |  |  |  |
| V3SVHSHC_5158817  | SNX5         |  |  |  | 1.275E-01 |  |  |  |  |  |
| V3SVHSHC_10804259 | USP3         |  |  |  | 1.286E-01 |  |  |  |  |  |
| V3SVHSHC_7639526  | SPACA4       |  |  |  | 1.304E-01 |  |  |  |  |  |
| V3SVHSHC_5127500  | ENTPD1       |  |  |  | 1.305E-01 |  |  |  |  |  |
| V3SVHSHC_10737665 | ENTHD1       |  |  |  | 1.318E-01 |  |  |  |  |  |
| V3SVHSHC_5582999  | MAGEA9       |  |  |  | 1.319E-01 |  |  |  |  |  |
| V3SVHSHC_7335926  | LNK1         |  |  |  | 1.340E-01 |  |  |  |  |  |
| V3SVHSHC_5685695  | COL4A6       |  |  |  | 1.348E-01 |  |  |  |  |  |
| V3SVHSHC_9853364  | VEGFB        |  |  |  | 1.360E-01 |  |  |  |  |  |
| V3SVHSHC_9576956  | AKR1C1       |  |  |  | 1.360E-01 |  |  |  |  |  |
| V3SVHSHC_9933587  | SEC24A       |  |  |  | 1.369E-01 |  |  |  |  |  |
| V3SVHSHC_8156306  | KCNIP3       |  |  |  | 1.376E-01 |  |  |  |  |  |
| V3SVHSHC_8896793  | TSSK4        |  |  |  | 1.378E-01 |  |  |  |  |  |
| V3SVHSHC_10706942 | TGFB3L       |  |  |  | 1.381E-01 |  |  |  |  |  |
| V3SVHSHC_6570425  | ZNF8         |  |  |  | 1.410E-01 |  |  |  |  |  |
| V3SVHSHC_9943883  | KPNA1        |  |  |  | 1.413E-01 |  |  |  |  |  |
| V3SVHSHC_5329592  | CCDC85A      |  |  |  | 1.414E-01 |  |  |  |  |  |
| V3SVHSHC_6106247  | COTL1        |  |  |  | 1.415E-01 |  |  |  |  |  |
| V3SVHSHC_7527095  | CACNA1E      |  |  |  | 1.424E-01 |  |  |  |  |  |
| V3SVHSHC_10107497 | ZNF623       |  |  |  | 1.454E-01 |  |  |  |  |  |
| V3SVHSHC_5067242  | JUN          |  |  |  | 1.464E-01 |  |  |  |  |  |
| V3SVHSHC_7868117  | GATAD2B      |  |  |  | 1.476E-01 |  |  |  |  |  |
| V3SVHSHC_9611210  | LRRC10B      |  |  |  | 1.490E-01 |  |  |  |  |  |
| V3SVHSHC_8366021  | GOLGA6L1     |  |  |  | 1.494E-01 |  |  |  |  |  |
| V3SVHSHC_9488978  | C12orf55     |  |  |  | 1.500E-01 |  |  |  |  |  |
| V3SVHSHC_9499043  | KRTAP10-9    |  |  |  | 1.507E-01 |  |  |  |  |  |
| V3SVHSHC_5979197  | LOC100293704 |  |  |  | 1.524E-01 |  |  |  |  |  |
| V3SVHSHC_7290089  | MYH14        |  |  |  | 1.532E-01 |  |  |  |  |  |
| V3SVHSHC_7671998  | EPHA5        |  |  |  | 1.534E-01 |  |  |  |  |  |
| V3SVHSHC_10651007 | AOC1         |  |  |  | 1.563E-01 |  |  |  |  |  |
| V3SVHSHC_6218810  | ADAM7        |  |  |  | 1.569E-01 |  |  |  |  |  |
| V3SVHSHC_5170796  | OR2V1        |  |  |  | 1.577E-01 |  |  |  |  |  |
| V3SVHSHC_6947285  | LCE3D        |  |  |  | 1.578E-01 |  |  |  |  |  |
| V3SVHSHC_6873695  | OR10A7       |  |  |  | 1.596E-01 |  |  |  |  |  |
| V3SVHSHC_9545672  | CCDC150      |  |  |  | 1.597E-01 |  |  |  |  |  |
| V3SVHSHC_6765323  | ASIC2        |  |  |  | 1.600E-01 |  |  |  |  |  |
| V3SVHSHC_6059090  | AQP8         |  |  |  | 1.604E-01 |  |  |  |  |  |
| V3SVHSHC_9057371  | LPAR1        |  |  |  | 1.618E-01 |  |  |  |  |  |
| V3SVHSHC_10144259 | ATG2A        |  |  |  | 1.618E-01 |  |  |  |  |  |
| V3SVHSHC_6611939  | POLR2F       |  |  |  | 1.624E-01 |  |  |  |  |  |
| V3SVHSHC_6377507  | OR52W1       |  |  |  | 1.624E-01 |  |  |  |  |  |
| V3SVHSHC_7557356  | RMND5B       |  |  |  | 1.648E-01 |  |  |  |  |  |
| V3SVHSHC_10100039 | DHX40        |  |  |  | 1.655E-01 |  |  |  |  |  |
| V3SVHSHC_6744896  | AKAP10       |  |  |  | 1.657E-01 |  |  |  |  |  |
| V3SVHSHC_4647944  | RGS22        |  |  |  | 1.659E-01 |  |  |  |  |  |
| V3SVHSHC_5709686  | ART5         |  |  |  | 1.676E-01 |  |  |  |  |  |
| V3SVHSHC_8956589  | MOB2         |  |  |  | 1.682E-01 |  |  |  |  |  |
| V3SVHSHC_7960187  | CDH15        |  |  |  | 1.683E-01 |  |  |  |  |  |
| V3SVHSHC_8833070  | CEP162       |  |  |  | 1.697E-01 |  |  |  |  |  |
| V3SVHSHC_6681404  | LOC101927989 |  |  |  | 1.699E-01 |  |  |  |  |  |
| V3SVHSHC_7536896  | SIPA1L2      |  |  |  | 1.700E-01 |  |  |  |  |  |
| V3SVHSHC_8899400  | NEFM         |  |  |  | 1.701E-01 |  |  |  |  |  |
| V3SVHSHC_5063381  | C1orf174     |  |  |  | 1.714E-01 |  |  |  |  |  |
| V3SVHSHC_7087139  | CSNK1D       |  |  |  | 1.718E-01 |  |  |  |  |  |

|                   |              |  |  |  |           |  |  |  |  |  |
|-------------------|--------------|--|--|--|-----------|--|--|--|--|--|
| V3SVHSHC_7211681  | CCDC173      |  |  |  | 1.722E-01 |  |  |  |  |  |
| V3SVHSHC_5510168  | KIAA0895L    |  |  |  | 1.730E-01 |  |  |  |  |  |
| V3SVHSHC_7976984  | LOC100996906 |  |  |  | 1.731E-01 |  |  |  |  |  |
| V3SVHSHC_9371993  | SGCB         |  |  |  | 1.733E-01 |  |  |  |  |  |
| V3SVHSHC_7264514  | KLF12        |  |  |  | 1.739E-01 |  |  |  |  |  |
| V3SVHSHC_9268109  | ZNF669       |  |  |  | 1.739E-01 |  |  |  |  |  |
| V3SVHSHC_5470205  | SAMD14       |  |  |  | 1.749E-01 |  |  |  |  |  |
| V3SVHSHC_9233690  | TMEM176B     |  |  |  | 1.787E-01 |  |  |  |  |  |
| V3SVHSHC_6752189  | NDOR1        |  |  |  | 1.809E-01 |  |  |  |  |  |
| V3SVHSHC_4650254  | SLC29A1      |  |  |  | 1.844E-01 |  |  |  |  |  |
| V3SVHSHC_6358334  | RBM24        |  |  |  | 1.844E-01 |  |  |  |  |  |
| V3SVHSHC_8305400  | OTUD7B       |  |  |  | 1.849E-01 |  |  |  |  |  |
| V3SVHSHC_4843370  | KRTAP4-11    |  |  |  | 1.853E-01 |  |  |  |  |  |
| V3SVHSHC_6934580  | MIER3        |  |  |  | 1.853E-01 |  |  |  |  |  |
| V3SVHSHC_5975369  | FTH1         |  |  |  | 1.877E-01 |  |  |  |  |  |
| V3SVHSHC_5161622  | LAMB1        |  |  |  | 1.887E-01 |  |  |  |  |  |
| V3SVHSHC_10314077 | SLC12A7      |  |  |  | 1.888E-01 |  |  |  |  |  |
| V3SVHSHC_8448257  | OGDH         |  |  |  | 1.908E-01 |  |  |  |  |  |
| V3SVHSHC_10035524 | TRIM24       |  |  |  | 1.931E-01 |  |  |  |  |  |
| V3SVHSHC_8508053  | LRRC42       |  |  |  | 1.944E-01 |  |  |  |  |  |
| V3SVHSHC_7921511  | GYG2         |  |  |  | 1.950E-01 |  |  |  |  |  |
| V3SVHSHC_5232902  | TRIM55       |  |  |  | 1.975E-01 |  |  |  |  |  |
| V3SVHSHC_8125583  | COP22        |  |  |  | 1.975E-01 |  |  |  |  |  |
| V3SVHSHC_7799675  | TFF3         |  |  |  | 1.986E-01 |  |  |  |  |  |
| V3SVHSHC_9370508  | MYO15A       |  |  |  | 2.013E-01 |  |  |  |  |  |
| V3SVHSHC_7746512  | CXorf49      |  |  |  | 2.025E-01 |  |  |  |  |  |
| V3SVHSHC_7928474  | PKNOX1       |  |  |  | 2.037E-01 |  |  |  |  |  |
| V3SVHSHC_6622136  | MSANTD3      |  |  |  | 2.037E-01 |  |  |  |  |  |
| V3SVHSHC_8648039  | ELK4         |  |  |  | 2.058E-01 |  |  |  |  |  |
| V3SVHSHC_7714634  | GZMB         |  |  |  | 2.068E-01 |  |  |  |  |  |
| V3SVHSHC_6236861  | SCGB2A1      |  |  |  | 2.071E-01 |  |  |  |  |  |
| V3SVHSHC_6777467  | CXorf49      |  |  |  | 2.091E-01 |  |  |  |  |  |
| V3SVHSHC_10704038 | PDE5A        |  |  |  | 2.096E-01 |  |  |  |  |  |
| V3SVHSHC_10645496 | BPTF         |  |  |  | 2.105E-01 |  |  |  |  |  |
| V3SVHSHC_6313883  | ITGB1BP2     |  |  |  | 2.108E-01 |  |  |  |  |  |
| V3SVHSHC_4742720  | MAP3K15      |  |  |  | 2.112E-01 |  |  |  |  |  |
| V3SVHSHC_9581543  | LOC100996646 |  |  |  | 2.129E-01 |  |  |  |  |  |
| V3SVHSHC_6129743  | LAMC2        |  |  |  | 2.132E-01 |  |  |  |  |  |
| V3SVHSHC_10643318 | RSRC1        |  |  |  | 2.152E-01 |  |  |  |  |  |
| V3SVHSHC_10753208 | PIGL         |  |  |  | 2.158E-01 |  |  |  |  |  |
| V3SVHSHC_7087535  | SPAST        |  |  |  | 2.224E-01 |  |  |  |  |  |
| V3SVHSHC_5137499  | IRX6         |  |  |  | 2.246E-01 |  |  |  |  |  |
| V3SVHSHC_5900162  | PSAT1        |  |  |  | 2.255E-01 |  |  |  |  |  |
| V3SVHSHC_4858814  | ATG16L1      |  |  |  | 2.258E-01 |  |  |  |  |  |
| V3SVHSHC_4981409  | SDS          |  |  |  | 2.261E-01 |  |  |  |  |  |
| V3SVHSHC_9644771  | ZNF536       |  |  |  | 2.265E-01 |  |  |  |  |  |
| V3SVHSHC_8159969  | GPR63        |  |  |  | 2.272E-01 |  |  |  |  |  |
| V3SVHSHC_10716215 | HIGD1C       |  |  |  | 2.277E-01 |  |  |  |  |  |
| V3SVHSHC_10199765 | DTX3         |  |  |  | 2.294E-01 |  |  |  |  |  |
| V3SVHSHC_7063247  | COPB2        |  |  |  | 2.295E-01 |  |  |  |  |  |
| V3SVHSHC_4867460  | PLK1         |  |  |  | 2.297E-01 |  |  |  |  |  |
| V3SVHSHC_6410573  | FNTB         |  |  |  | 2.309E-01 |  |  |  |  |  |
| V3SVHSHC_6516470  | SULT6B1      |  |  |  | 2.310E-01 |  |  |  |  |  |
| V3SVHSHC_8484821  | SIPA1L3      |  |  |  | 2.319E-01 |  |  |  |  |  |
| V3SVHSHC_10268306 | PPP2R1A      |  |  |  | 2.334E-01 |  |  |  |  |  |

|                   |              |  |  |  |           |  |  |  |  |  |
|-------------------|--------------|--|--|--|-----------|--|--|--|--|--|
| V3SVHSHC_7655630  | POLR1A       |  |  |  | 2.361E-01 |  |  |  |  |  |
| V3SVHSHC_10391561 | SCAND3       |  |  |  | 2.364E-01 |  |  |  |  |  |
| V3SVHSHC_10752317 | OR13C2       |  |  |  | 2.367E-01 |  |  |  |  |  |
| V3SVHSHC_10504619 | PPIB         |  |  |  | 2.379E-01 |  |  |  |  |  |
| V3SVHSHC_5807663  | RALGDS       |  |  |  | 2.384E-01 |  |  |  |  |  |
| V3SVHSHC_9939692  | GMDS         |  |  |  | 2.411E-01 |  |  |  |  |  |
| V3SVHSHC_5335169  | ARSD         |  |  |  | 2.442E-01 |  |  |  |  |  |
| V3SVHSHC_7814492  | PIAS3        |  |  |  | 2.451E-01 |  |  |  |  |  |
| V3SVHSHC_7055558  | NSUN3        |  |  |  | 2.460E-01 |  |  |  |  |  |
| V3SVHSHC_8907881  | NGFRAP1      |  |  |  | 2.469E-01 |  |  |  |  |  |
| V3SVHSHC_7973585  | ACTB         |  |  |  | 2.470E-01 |  |  |  |  |  |
| V3SVHSHC_4739948  | GUCD1        |  |  |  | 2.476E-01 |  |  |  |  |  |
| V3SVHSHC_10540985 | CASKIN1      |  |  |  | 2.485E-01 |  |  |  |  |  |
| V3SVHSHC_10594313 | SKIL         |  |  |  | 2.508E-01 |  |  |  |  |  |
| V3SVHSHC_6909236  | C21ORF33     |  |  |  | 2.520E-01 |  |  |  |  |  |
| V3SVHSHC_10737005 | TGM6         |  |  |  | 2.521E-01 |  |  |  |  |  |
| V3SVHSHC_7752122  | TRAP1        |  |  |  | 2.522E-01 |  |  |  |  |  |
| V3SVHSHC_8943389  | MESP2        |  |  |  | 2.536E-01 |  |  |  |  |  |
| V3SVHSHC_7907453  | NPY4R        |  |  |  | 2.544E-01 |  |  |  |  |  |
| V3SVHSHC_5089682  | YAP1         |  |  |  | 2.549E-01 |  |  |  |  |  |
| V3SVHSHC_4986392  | HMGCS1       |  |  |  | 2.579E-01 |  |  |  |  |  |
| V3SVHSHC_4716716  | SRSF12       |  |  |  | 2.595E-01 |  |  |  |  |  |
| V3SVHSHC_5058101  | SLC32A1      |  |  |  | 2.599E-01 |  |  |  |  |  |
| V3SVHSHC_8067041  | ASB2         |  |  |  | 2.607E-01 |  |  |  |  |  |
| V3SVHSHC_6226598  | ATP5E        |  |  |  | 2.641E-01 |  |  |  |  |  |
| V3SVHSHC_6503303  | KCNT1        |  |  |  | 2.648E-01 |  |  |  |  |  |
| V3SVHSHC_10603058 | TRAT1        |  |  |  | 2.656E-01 |  |  |  |  |  |
| V3SVHSHC_10168019 | GPIHBP1      |  |  |  | 2.663E-01 |  |  |  |  |  |
| V3SVHSHC_7721036  | DPH6         |  |  |  | 2.687E-01 |  |  |  |  |  |
| V3SVHSHC_5737439  | AADAC        |  |  |  | 2.695E-01 |  |  |  |  |  |
| V3SVHSHC_4799678  | GJD2         |  |  |  | 2.717E-01 |  |  |  |  |  |
| V3SVHSHC_8123966  | KRTAP10-7    |  |  |  | 2.768E-01 |  |  |  |  |  |
| V3SVHSHC_6624644  | CDR1         |  |  |  | 2.778E-01 |  |  |  |  |  |
| V3SVHSHC_9299261  | CLPP         |  |  |  | 2.797E-01 |  |  |  |  |  |
| V3SVHSHC_10487459 | PLK1         |  |  |  | 2.799E-01 |  |  |  |  |  |
| V3SVHSHC_5875412  | MAGI2        |  |  |  | 2.806E-01 |  |  |  |  |  |
| V3SVHSHC_7226465  | PI3          |  |  |  | 2.830E-01 |  |  |  |  |  |
| V3SVHSHC_10780433 | HVCN1        |  |  |  | 2.848E-01 |  |  |  |  |  |
| V3SVHSHC_9177491  | GTF2H2C      |  |  |  | 2.854E-01 |  |  |  |  |  |
| V3SVHSHC_8161322  | ABCG4        |  |  |  | 2.859E-01 |  |  |  |  |  |
| V3SVHSHC_9651536  | RASIP1       |  |  |  | 2.864E-01 |  |  |  |  |  |
| V3SVHSHC_10748753 | TRMT2A       |  |  |  | 2.868E-01 |  |  |  |  |  |
| V3SVHSHC_7652198  | CELF6        |  |  |  | 2.870E-01 |  |  |  |  |  |
| V3SVHSHC_6784100  | ESCO2        |  |  |  | 2.876E-01 |  |  |  |  |  |
| V3SVHSHC_5151920  | GLI2         |  |  |  | 2.877E-01 |  |  |  |  |  |
| V3SVHSHC_7791887  | Prss58       |  |  |  | 2.889E-01 |  |  |  |  |  |
| V3SVHSHC_8832773  | NDUFAF3      |  |  |  | 2.894E-01 |  |  |  |  |  |
| V3SVHSHC_10223228 | LTBP1        |  |  |  | 2.914E-01 |  |  |  |  |  |
| V3SVHSHC_5580920  | KLHL18       |  |  |  | 2.915E-01 |  |  |  |  |  |
| V3SVHSHC_9252368  | ZNF532       |  |  |  | 2.932E-01 |  |  |  |  |  |
| V3SVHSHC_8911445  | RBBP9        |  |  |  | 2.937E-01 |  |  |  |  |  |
| V3SVHSHC_5554883  | LOC100293704 |  |  |  | 2.945E-01 |  |  |  |  |  |
| V3SVHSHC_9824984  | KRT80        |  |  |  | 2.951E-01 |  |  |  |  |  |
| V3SVHSHC_7135451  | TMED7-TICAM2 |  |  |  | 2.959E-01 |  |  |  |  |  |
| V3SVHSHC_6822182  | MORF4L1      |  |  |  | 2.973E-01 |  |  |  |  |  |



|                   |              |  |  |  |           |  |  |  |  |  |
|-------------------|--------------|--|--|--|-----------|--|--|--|--|--|
| V3SVHSHC_9501518  | THUMPD1      |  |  |  | 2.981E-01 |  |  |  |  |  |
| V3SVHSHC_8637413  | FAM198B      |  |  |  | 2.998E-01 |  |  |  |  |  |
| V3SVHSHC_6839144  | TMCC3        |  |  |  | 3.032E-01 |  |  |  |  |  |
| V3SVHSHC_10320281 | GPT          |  |  |  | 3.037E-01 |  |  |  |  |  |
| V3SVHSHC_4774532  | MAPK12       |  |  |  | 3.073E-01 |  |  |  |  |  |
| V3SVHSHC_8389022  | FAM129C      |  |  |  | 3.077E-01 |  |  |  |  |  |
| V3SVHSHC_6877754  | KRTAP26-1    |  |  |  | 3.098E-01 |  |  |  |  |  |
| V3SVHSHC_10216958 | RXRB         |  |  |  | 3.106E-01 |  |  |  |  |  |
| V3SVHSHC_9103802  | CYC1         |  |  |  | 3.110E-01 |  |  |  |  |  |
| V3SVHSHC_6534554  | IFIT1        |  |  |  | 3.110E-01 |  |  |  |  |  |
| V3SVHSHC_9077534  | PTPLAD2      |  |  |  | 3.116E-01 |  |  |  |  |  |
| V3SVHSHC_9687176  | ELP4         |  |  |  | 3.121E-01 |  |  |  |  |  |
| V3SVHSHC_8771591  | ERAP1        |  |  |  | 3.126E-01 |  |  |  |  |  |
| V3SVHSHC_6494558  | SLC35D3      |  |  |  | 3.147E-01 |  |  |  |  |  |
| V3SVHSHC_8237420  | DOK2         |  |  |  | 3.150E-01 |  |  |  |  |  |
| V3SVHSHC_5103872  | NSUN3        |  |  |  | 3.158E-01 |  |  |  |  |  |
| V3SVHSHC_4913660  | ARF4         |  |  |  | 3.183E-01 |  |  |  |  |  |
| V3SVHSHC_8047802  | Eif6         |  |  |  | 3.203E-01 |  |  |  |  |  |
| V3SVHSHC_9234350  | Eif6         |  |  |  | 3.220E-01 |  |  |  |  |  |
| V3SVHSHC_6312860  | CCDC135      |  |  |  | 3.233E-01 |  |  |  |  |  |
| V3SVHSHC_6481853  | C6ORF118     |  |  |  | 3.236E-01 |  |  |  |  |  |
| V3SVHSHC_4687313  | PPP2R1A      |  |  |  | 3.243E-01 |  |  |  |  |  |
| V3SVHSHC_8037770  | PI4KB        |  |  |  | 3.244E-01 |  |  |  |  |  |
| V3SVHSHC_4635470  | SLFN11       |  |  |  | 3.246E-01 |  |  |  |  |  |
| V3SVHSHC_7034966  | UBTF         |  |  |  | 3.250E-01 |  |  |  |  |  |
| V3SVHSHC_5629628  | FCGR3B       |  |  |  | 3.258E-01 |  |  |  |  |  |
| V3SVHSHC_5974082  | ARRDC3       |  |  |  | 3.279E-01 |  |  |  |  |  |
| V3SVHSHC_7410110  | AURKA        |  |  |  | 3.294E-01 |  |  |  |  |  |
| V3SVHSHC_5567885  | BNC2         |  |  |  | 3.295E-01 |  |  |  |  |  |
| V3SVHSHC_8788586  | CENPU        |  |  |  | 3.296E-01 |  |  |  |  |  |
| V3SVHSHC_10294541 | OR4M1        |  |  |  | 3.297E-01 |  |  |  |  |  |
| V3SVHSHC_6859736  | ZNF286B      |  |  |  | 3.306E-01 |  |  |  |  |  |
| V3SVHSHC_7224419  | C6orf58      |  |  |  | 3.309E-01 |  |  |  |  |  |
| V3SVHSHC_5820236  | GPR88        |  |  |  | 3.332E-01 |  |  |  |  |  |
| V3SVHSHC_5085821  | KRTCAP3      |  |  |  | 3.347E-01 |  |  |  |  |  |
| V3SVHSHC_10652756 | SLC4A10      |  |  |  | 3.365E-01 |  |  |  |  |  |
| V3SVHSHC_6777434  | HUNK         |  |  |  | 3.375E-01 |  |  |  |  |  |
| V3SVHSHC_6037442  | Tmem190      |  |  |  | 3.384E-01 |  |  |  |  |  |
| V3SVHSHC_9247517  | ZNF214       |  |  |  | 3.404E-01 |  |  |  |  |  |
| V3SVHSHC_10360937 | HS6ST1       |  |  |  | 3.410E-01 |  |  |  |  |  |
| V3SVHSHC_5272832  | ERVMER34-1   |  |  |  | 3.414E-01 |  |  |  |  |  |
| V3SVHSHC_5657216  | RND3         |  |  |  | 3.414E-01 |  |  |  |  |  |
| V3SVHSHC_6498518  | LOC101930441 |  |  |  | 3.422E-01 |  |  |  |  |  |
| V3SVHSHC_7026980  | SUPT4H1      |  |  |  | 3.438E-01 |  |  |  |  |  |
| V3SVHSHC_9372818  | IL17RB       |  |  |  | 3.446E-01 |  |  |  |  |  |
| V3SVHSHC_10780235 | UHRF1        |  |  |  | 3.448E-01 |  |  |  |  |  |
| V3SVHSHC_8232899  | IFRD2        |  |  |  | 3.465E-01 |  |  |  |  |  |
| V3SVHSHC_6662825  | FAM217B      |  |  |  | 3.476E-01 |  |  |  |  |  |
| V3SVHSHC_5627978  | ZZEF1        |  |  |  | 3.482E-01 |  |  |  |  |  |
| V3SVHSHC_9277976  | H3F3B        |  |  |  | 3.491E-01 |  |  |  |  |  |
| V3SVHSHC_4773872  | SULT1E1      |  |  |  | 3.492E-01 |  |  |  |  |  |
| V3SVHSHC_4749782  | LRRC31       |  |  |  | 3.497E-01 |  |  |  |  |  |
| V3SVHSHC_6530957  | SCGB1D1      |  |  |  | 3.502E-01 |  |  |  |  |  |
| V3SVHSHC_5242274  | AQR          |  |  |  | 3.503E-01 |  |  |  |  |  |
| V3SVHSHC_9499967  | SLC1A6       |  |  |  | 3.513E-01 |  |  |  |  |  |

|                   |              |  |  |  |           |  |  |  |  |  |
|-------------------|--------------|--|--|--|-----------|--|--|--|--|--|
| V3SVHSHC_7192508  | AKAP11       |  |  |  | 3.518E-01 |  |  |  |  |  |
| V3SVHSHC_10145942 | AKR1B15      |  |  |  | 3.521E-01 |  |  |  |  |  |
| V3SVHSHC_8480696  | OR4F15       |  |  |  | 3.526E-01 |  |  |  |  |  |
| V3SVHSHC_7190429  | NUP210       |  |  |  | 3.528E-01 |  |  |  |  |  |
| V3SVHSHC_8234648  | TINAG        |  |  |  | 3.530E-01 |  |  |  |  |  |
| V3SVHSHC_7464923  | PLD3         |  |  |  | 3.535E-01 |  |  |  |  |  |
| V3SVHSHC_7626755  | SYNGR4       |  |  |  | 3.536E-01 |  |  |  |  |  |
| V3SVHSHC_8340941  | MTL5         |  |  |  | 3.541E-01 |  |  |  |  |  |
| V3SVHSHC_7062587  | C12orf77     |  |  |  | 3.562E-01 |  |  |  |  |  |
| V3SVHSHC_9651668  | GRPEL1       |  |  |  | 3.566E-01 |  |  |  |  |  |
| V3SVHSHC_10427399 | WTH3DI       |  |  |  | 3.585E-01 |  |  |  |  |  |
| V3SVHSHC_9654077  | FAM109A      |  |  |  | 3.585E-01 |  |  |  |  |  |
| V3SVHSHC_5590094  | LETMD1       |  |  |  | 3.589E-01 |  |  |  |  |  |
| V3SVHSHC_6308438  | R3HDML       |  |  |  | 3.596E-01 |  |  |  |  |  |
| V3SVHSHC_7520330  | H3F3B        |  |  |  | 3.597E-01 |  |  |  |  |  |
| V3SVHSHC_9313022  | ZBTB20       |  |  |  | 3.600E-01 |  |  |  |  |  |
| V3SVHSHC_5128985  | PGM2L1       |  |  |  | 3.610E-01 |  |  |  |  |  |
| V3SVHSHC_7158287  | GDPD3        |  |  |  | 3.624E-01 |  |  |  |  |  |
| V3SVHSHC_7506998  | WWC1         |  |  |  | 3.640E-01 |  |  |  |  |  |
| V3SVHSHC_10381397 | HTR1F        |  |  |  | 3.654E-01 |  |  |  |  |  |
| V3SVHSHC_10214252 | POLR1E       |  |  |  | 3.662E-01 |  |  |  |  |  |
| V3SVHSHC_6189605  | F10          |  |  |  | 3.670E-01 |  |  |  |  |  |
| V3SVHSHC_9379319  | OR5A2        |  |  |  | 3.672E-01 |  |  |  |  |  |
| V3SVHSHC_6379520  | DENND6B      |  |  |  | 3.682E-01 |  |  |  |  |  |
| V3SVHSHC_7972529  | C1orf210     |  |  |  | 3.684E-01 |  |  |  |  |  |
| V3SVHSHC_6289100  | ALG10B       |  |  |  | 3.689E-01 |  |  |  |  |  |
| V3SVHSHC_10723343 | DGKB         |  |  |  | 3.697E-01 |  |  |  |  |  |
| V3SVHSHC_5318867  | DOCK10       |  |  |  | 3.714E-01 |  |  |  |  |  |
| V3SVHSHC_8292035  | Snmp25       |  |  |  | 3.715E-01 |  |  |  |  |  |
| V3SVHSHC_9478979  | ATP13A5      |  |  |  | 3.719E-01 |  |  |  |  |  |
| V3SVHSHC_6334376  | SIDT2        |  |  |  | 3.725E-01 |  |  |  |  |  |
| V3SVHSHC_4670747  | LOC101928761 |  |  |  | 3.726E-01 |  |  |  |  |  |
| V3SVHSHC_8211482  | TRMT112      |  |  |  | 3.748E-01 |  |  |  |  |  |
| V3SVHSHC_9731462  | STAT6        |  |  |  | 3.749E-01 |  |  |  |  |  |
| V3SVHSHC_6889073  | HDLBP        |  |  |  | 3.754E-01 |  |  |  |  |  |
| V3SVHSHC_7611905  | NARS         |  |  |  | 3.758E-01 |  |  |  |  |  |
| V3SVHSHC_9899003  | ZBTB43       |  |  |  | 3.771E-01 |  |  |  |  |  |
| V3SVHSHC_5570261  | ITGB1        |  |  |  | 3.771E-01 |  |  |  |  |  |
| V3SVHSHC_9637247  | RPN2         |  |  |  | 3.786E-01 |  |  |  |  |  |
| V3SVHSHC_5555708  | EVL          |  |  |  | 3.792E-01 |  |  |  |  |  |
| V3SVHSHC_5553200  | BARD1        |  |  |  | 3.801E-01 |  |  |  |  |  |
| V3SVHSHC_4762322  | ANKRD22      |  |  |  | 3.812E-01 |  |  |  |  |  |
| V3SVHSHC_7343681  | CGNL1        |  |  |  | 3.821E-01 |  |  |  |  |  |
| V3SVHSHC_9170099  | EDNRA        |  |  |  | 3.822E-01 |  |  |  |  |  |
| V3SVHSHC_5007380  | ENOX1        |  |  |  | 3.823E-01 |  |  |  |  |  |
| V3SVHSHC_5172545  | CBLC         |  |  |  | 3.828E-01 |  |  |  |  |  |
| V3SVHSHC_5997578  | HIF3A        |  |  |  | 3.833E-01 |  |  |  |  |  |
| V3SVHSHC_9810563  | LRRC2        |  |  |  | 3.852E-01 |  |  |  |  |  |
| V3SVHSHC_7234286  | SPATA33      |  |  |  | 3.858E-01 |  |  |  |  |  |
| V3SVHSHC_6816638  | THEMIS2      |  |  |  | 3.859E-01 |  |  |  |  |  |
| V3SVHSHC_6043811  | SSX2         |  |  |  | 3.862E-01 |  |  |  |  |  |
| V3SVHSHC_4979297  | C8ORF4       |  |  |  | 3.870E-01 |  |  |  |  |  |
| V3SVHSHC_8172476  | ZNF202       |  |  |  | 3.884E-01 |  |  |  |  |  |
| V3SVHSHC_9533429  | ATP1B3       |  |  |  | 3.890E-01 |  |  |  |  |  |
| V3SVHSHC_6427667  | RBBP9        |  |  |  | 3.917E-01 |  |  |  |  |  |

|                   |               |  |  |  |           |  |  |  |  |  |
|-------------------|---------------|--|--|--|-----------|--|--|--|--|--|
| V3SVHSHC_6218216  | RPS6KL1       |  |  |  | 3.930E-01 |  |  |  |  |  |
| V3SVHSHC_10317641 | FAM209A       |  |  |  | 3.934E-01 |  |  |  |  |  |
| V3SVHSHC_7913261  | TXK           |  |  |  | 3.935E-01 |  |  |  |  |  |
| V3SVHSHC_7367804  | PSME2         |  |  |  | 3.937E-01 |  |  |  |  |  |
| V3SVHSHC_4953260  | OIT3          |  |  |  | 3.945E-01 |  |  |  |  |  |
| V3SVHSHC_10705424 | KIFC2         |  |  |  | 3.955E-01 |  |  |  |  |  |
| V3SVHSHC_9331535  | DRC1          |  |  |  | 3.959E-01 |  |  |  |  |  |
| V3SVHSHC_8490596  | TFAM          |  |  |  | 3.966E-01 |  |  |  |  |  |
| V3SVHSHC_6668336  | MRPL44        |  |  |  | 4.007E-01 |  |  |  |  |  |
| V3SVHSHC_9301703  | LINC00684     |  |  |  | 4.007E-01 |  |  |  |  |  |
| V3SVHSHC_10531382 | ZBED2         |  |  |  | 4.011E-01 |  |  |  |  |  |
| V3SVHSHC_7906595  | JMJD7-PLA2G4B |  |  |  | 4.018E-01 |  |  |  |  |  |
| V3SVHSHC_10401329 | NAV1          |  |  |  | 4.021E-01 |  |  |  |  |  |
| V3SVHSHC_7700180  | PXT1          |  |  |  | 4.022E-01 |  |  |  |  |  |
| V3SVHSHC_5190002  | ROBO1         |  |  |  | 4.026E-01 |  |  |  |  |  |
| V3SVHSHC_5226830  | NLRP2         |  |  |  | 4.028E-01 |  |  |  |  |  |
| V3SVHSHC_7082750  | METTL2B       |  |  |  | 4.041E-01 |  |  |  |  |  |
| V3SVHSHC_10701563 | FCER2         |  |  |  | 4.045E-01 |  |  |  |  |  |
| V3SVHSHC_7810862  | CDK2          |  |  |  | 4.058E-01 |  |  |  |  |  |
| V3SVHSHC_7847855  | C12orf65      |  |  |  | 4.083E-01 |  |  |  |  |  |
| V3SVHSHC_9975497  | LONP1         |  |  |  | 4.087E-01 |  |  |  |  |  |
| V3SVHSHC_6304148  | GPR65         |  |  |  | 4.088E-01 |  |  |  |  |  |
| V3SVHSHC_10074002 | LMAN2         |  |  |  | 4.100E-01 |  |  |  |  |  |
| V3SVHSHC_7683713  | AXL           |  |  |  | 4.101E-01 |  |  |  |  |  |
| V3SVHSHC_8176799  | SSR2          |  |  |  | 4.119E-01 |  |  |  |  |  |
| V3SVHSHC_5200925  | PPP1R16A      |  |  |  | 4.123E-01 |  |  |  |  |  |
| V3SVHSHC_8207753  | TPO           |  |  |  | 4.126E-01 |  |  |  |  |  |
| V3SVHSHC_8407667  | ZNF689        |  |  |  | 4.127E-01 |  |  |  |  |  |
| V3SVHSHC_5149676  | HSPBP1        |  |  |  | 4.135E-01 |  |  |  |  |  |
| V3SVHSHC_5418527  | SYNPO         |  |  |  | 4.142E-01 |  |  |  |  |  |
| V3SVHSHC_8692622  | ILVBL         |  |  |  | 4.143E-01 |  |  |  |  |  |
| V3SVHSHC_7082651  | RHBDL1        |  |  |  | 4.144E-01 |  |  |  |  |  |
| V3SVHSHC_7215377  | RAB2A         |  |  |  | 4.181E-01 |  |  |  |  |  |
| V3SVHSHC_9576263  | ANKFN1        |  |  |  | 4.186E-01 |  |  |  |  |  |
| V3SVHSHC_7598540  | LEAP2         |  |  |  | 4.188E-01 |  |  |  |  |  |
| V3SVHSHC_10658960 | AGA           |  |  |  | 4.193E-01 |  |  |  |  |  |
| V3SVHSHC_6805484  | PHOX2A        |  |  |  | 4.196E-01 |  |  |  |  |  |
| V3SVHSHC_6164063  | AQP6          |  |  |  | 4.205E-01 |  |  |  |  |  |
| V3SVHSHC_9115055  | GRIA4         |  |  |  | 4.219E-01 |  |  |  |  |  |
| V3SVHSHC_10278239 | KIR2DL5B      |  |  |  | 4.221E-01 |  |  |  |  |  |
| V3SVHSHC_10212272 | SAMD15        |  |  |  | 4.232E-01 |  |  |  |  |  |
| V3SVHSHC_8691500  | RNASE9        |  |  |  | 4.234E-01 |  |  |  |  |  |
| V3SVHSHC_4677281  | PRLR          |  |  |  | 4.251E-01 |  |  |  |  |  |
| V3SVHSHC_6237983  | FBXO22        |  |  |  | 4.254E-01 |  |  |  |  |  |
| V3SVHSHC_8331602  | LOC100293704  |  |  |  | 4.257E-01 |  |  |  |  |  |
| V3SVHSHC_6344804  | MMP19         |  |  |  | 4.266E-01 |  |  |  |  |  |
| V3SVHSHC_4711931  | PORCN         |  |  |  | 4.292E-01 |  |  |  |  |  |
| V3SVHSHC_7120139  | EDNRB         |  |  |  | 4.300E-01 |  |  |  |  |  |
| V3SVHSHC_6208712  | SAP130        |  |  |  | 4.302E-01 |  |  |  |  |  |
| V3SVHSHC_7151522  | FNDC3B        |  |  |  | 4.308E-01 |  |  |  |  |  |
| V3SVHSHC_6073907  | MEA1          |  |  |  | 4.311E-01 |  |  |  |  |  |
| V3SVHSHC_5551979  | PFDN4         |  |  |  | 4.314E-01 |  |  |  |  |  |
| V3SVHSHC_7581710  | Glipr2        |  |  |  | 4.326E-01 |  |  |  |  |  |
| V3SVHSHC_8916527  | MAPK4         |  |  |  | 4.326E-01 |  |  |  |  |  |
| V3SVHSHC_10060901 | MAD2L1        |  |  |  | 4.336E-01 |  |  |  |  |  |

|                   |              |  |  |  |           |  |  |  |  |  |
|-------------------|--------------|--|--|--|-----------|--|--|--|--|--|
| V3SVHSHC_5325896  | DENND5A      |  |  |  | 4.339E-01 |  |  |  |  |  |
| V3SVHSHC_8580389  | HCRTR1       |  |  |  | 4.351E-01 |  |  |  |  |  |
| V3SVHSHC_6442715  | TP63         |  |  |  | 4.356E-01 |  |  |  |  |  |
| V3SVHSHC_9344504  | TBC1D32      |  |  |  | 4.391E-01 |  |  |  |  |  |
| V3SVHSHC_10470530 | CYP39A1      |  |  |  | 4.391E-01 |  |  |  |  |  |
| V3SVHSHC_7268507  | RAB24        |  |  |  | 4.401E-01 |  |  |  |  |  |
| V3SVHSHC_4949366  | DYNLT3       |  |  |  | 4.415E-01 |  |  |  |  |  |
| V3SVHSHC_10034798 | GBP1         |  |  |  | 4.428E-01 |  |  |  |  |  |
| V3SVHSHC_10065125 | MMP7         |  |  |  | 4.433E-01 |  |  |  |  |  |
| V3SVHSHC_9250487  | HSD17B6      |  |  |  | 4.436E-01 |  |  |  |  |  |
| V3SVHSHC_6804065  | PRR5-ARHGAP8 |  |  |  | 4.442E-01 |  |  |  |  |  |
| V3SVHSHC_6243824  | EPSTI1       |  |  |  | 4.443E-01 |  |  |  |  |  |
| V3SVHSHC_9832937  | MTX1         |  |  |  | 4.443E-01 |  |  |  |  |  |
| V3SVHSHC_10317377 | ZNF473       |  |  |  | 4.446E-01 |  |  |  |  |  |
| V3SVHSHC_9962660  | MYH15        |  |  |  | 4.447E-01 |  |  |  |  |  |
| V3SVHSHC_4877393  | DYNLL2       |  |  |  | 4.447E-01 |  |  |  |  |  |
| V3SVHSHC_5491820  | MAN1C1       |  |  |  | 4.448E-01 |  |  |  |  |  |
| V3SVHSHC_6874817  | BMP4         |  |  |  | 4.455E-01 |  |  |  |  |  |
| V3SVHSHC_10047140 | C1orf226     |  |  |  | 4.465E-01 |  |  |  |  |  |
| V3SVHSHC_10593587 | VMO1         |  |  |  | 4.474E-01 |  |  |  |  |  |
| V3SVHSHC_8364470  | Mob1b        |  |  |  | 4.482E-01 |  |  |  |  |  |
| V3SVHSHC_6219371  | CCDC107      |  |  |  | 4.482E-01 |  |  |  |  |  |
| V3SVHSHC_9422318  | RYR3         |  |  |  | 4.483E-01 |  |  |  |  |  |
| V3SVHSHC_5968175  | TCTE1        |  |  |  | 4.486E-01 |  |  |  |  |  |
| V3SVHSHC_9397634  | EPHX3        |  |  |  | 4.486E-01 |  |  |  |  |  |
| V3SVHSHC_7614050  | TM9SF2       |  |  |  | 4.490E-01 |  |  |  |  |  |
| V3SVHSHC_8045888  | ECH1         |  |  |  | 4.496E-01 |  |  |  |  |  |
| V3SVHSHC_7492412  | TTLL7        |  |  |  | 4.498E-01 |  |  |  |  |  |
| V3SVHSHC_7195016  | GFI1         |  |  |  | 4.525E-01 |  |  |  |  |  |
| V3SVHSHC_6899039  | SGCG         |  |  |  | 4.528E-01 |  |  |  |  |  |
| V3SVHSHC_9108257  | FAM65A       |  |  |  | 4.529E-01 |  |  |  |  |  |
| V3SVHSHC_9915734  | EEFSEC       |  |  |  | 4.532E-01 |  |  |  |  |  |
| V3SVHSHC_5400707  | DSCR4        |  |  |  | 4.532E-01 |  |  |  |  |  |
| V3SVHSHC_8367704  | LOC729159    |  |  |  | 4.533E-01 |  |  |  |  |  |
| V3SVHSHC_4908611  | RAPGEF6      |  |  |  | 4.539E-01 |  |  |  |  |  |
| V3SVHSHC_10127891 | CLINT1       |  |  |  | 4.542E-01 |  |  |  |  |  |
| V3SVHSHC_8701433  | CNR1         |  |  |  | 4.543E-01 |  |  |  |  |  |
| V3SVHSHC_7025330  | UNC45A       |  |  |  | 4.549E-01 |  |  |  |  |  |
| V3SVHSHC_9542999  | ARHGAP29     |  |  |  | 4.553E-01 |  |  |  |  |  |
| V3SVHSHC_9572105  | GBAS         |  |  |  | 4.566E-01 |  |  |  |  |  |
| V3SVHSHC_8122613  | DHX40        |  |  |  | 4.571E-01 |  |  |  |  |  |
| V3SVHSHC_5117039  | TMEM251      |  |  |  | 4.576E-01 |  |  |  |  |  |
| V3SVHSHC_10134986 | MGEA5        |  |  |  | 4.581E-01 |  |  |  |  |  |
| V3SVHSHC_9863198  | LOC101930432 |  |  |  | 4.582E-01 |  |  |  |  |  |
| V3SVHSHC_9488615  | KAT5         |  |  |  | 4.583E-01 |  |  |  |  |  |
| V3SVHSHC_8430932  | WDR41        |  |  |  | 4.591E-01 |  |  |  |  |  |
| V3SVHSHC_5283590  | ELOVL2       |  |  |  | 4.597E-01 |  |  |  |  |  |
| V3SVHSHC_5634248  | TTLL13       |  |  |  | 4.597E-01 |  |  |  |  |  |
| V3SVHSHC_9664604  | OR2W5        |  |  |  | 4.598E-01 |  |  |  |  |  |
| V3SVHSHC_5097767  | GAB3         |  |  |  | 4.600E-01 |  |  |  |  |  |
| V3SVHSHC_10226990 | LARGE        |  |  |  | 4.602E-01 |  |  |  |  |  |
| V3SVHSHC_8297711  | XPNPEP2      |  |  |  | 4.617E-01 |  |  |  |  |  |
| V3SVHSHC_4748990  | FICD         |  |  |  | 4.631E-01 |  |  |  |  |  |
| V3SVHSHC_9920024  | KCNK13       |  |  |  | 4.634E-01 |  |  |  |  |  |
| V3SVHSHC_4672925  | NDUFAF5      |  |  |  | 4.638E-01 |  |  |  |  |  |

|                   |              |  |  |  |           |  |  |  |  |  |
|-------------------|--------------|--|--|--|-----------|--|--|--|--|--|
| V3SVHSHC_8161916  | FASLG        |  |  |  | 4.652E-01 |  |  |  |  |  |
| V3SVHSHC_8808551  | NUDT3        |  |  |  | 4.682E-01 |  |  |  |  |  |
| V3SVHSHC_8461655  | SERPINE3     |  |  |  | 4.687E-01 |  |  |  |  |  |
| V3SVHSHC_8983583  | PCDHA12      |  |  |  | 4.718E-01 |  |  |  |  |  |
| V3SVHSHC_7870328  | AGAP10       |  |  |  | 4.720E-01 |  |  |  |  |  |
| V3SVHSHC_7453736  | URB1         |  |  |  | 4.727E-01 |  |  |  |  |  |
| V3SVHSHC_8133866  | G6PC         |  |  |  | 4.732E-01 |  |  |  |  |  |
| V3SVHSHC_8761691  | ACAT1        |  |  |  | 4.734E-01 |  |  |  |  |  |
| V3SVHSHC_8102351  | SHOX         |  |  |  | 4.757E-01 |  |  |  |  |  |
| V3SVHSHC_8742947  | CTNNA2       |  |  |  | 4.788E-01 |  |  |  |  |  |
| V3SVHSHC_10074662 | DPPA3        |  |  |  | 4.799E-01 |  |  |  |  |  |
| V3SVHSHC_7491059  | IVD          |  |  |  | 4.803E-01 |  |  |  |  |  |
| V3SVHSHC_7479146  | SYT16        |  |  |  | 4.824E-01 |  |  |  |  |  |
| V3SVHSHC_9658565  | NQO1         |  |  |  | 4.825E-01 |  |  |  |  |  |
| V3SVHSHC_9872570  | PRR20E       |  |  |  | 4.829E-01 |  |  |  |  |  |
| V3SVHSHC_10050539 | NMNAT2       |  |  |  | 4.830E-01 |  |  |  |  |  |
| V3SVHSHC_6215015  | RAVER2       |  |  |  | 4.833E-01 |  |  |  |  |  |
| V3SVHSHC_4810073  | ADGB         |  |  |  | 4.833E-01 |  |  |  |  |  |
| V3SVHSHC_7728527  | ALG2         |  |  |  | 4.841E-01 |  |  |  |  |  |
| V3SVHSHC_9576626  | CHIC1        |  |  |  | 4.849E-01 |  |  |  |  |  |
| V3SVHSHC_8595239  | NOX3         |  |  |  | 4.852E-01 |  |  |  |  |  |
| V3SVHSHC_10472312 | SIRPD        |  |  |  | 4.853E-01 |  |  |  |  |  |
| V3SVHSHC_7508615  | TMEM185A     |  |  |  | 4.859E-01 |  |  |  |  |  |
| V3SVHSHC_6263228  | LOC100652871 |  |  |  | 4.864E-01 |  |  |  |  |  |
| V3SVHSHC_10668299 | ASPSR1       |  |  |  | 4.868E-01 |  |  |  |  |  |
| V3SVHSHC_5614481  | CMTM4        |  |  |  | 4.869E-01 |  |  |  |  |  |
| V3SVHSHC_10412021 | EV12B        |  |  |  | 4.875E-01 |  |  |  |  |  |
| V3SVHSHC_6228380  | KLHL2        |  |  |  | 4.883E-01 |  |  |  |  |  |
| V3SVHSHC_7042160  | CCNK         |  |  |  | 4.889E-01 |  |  |  |  |  |
| V3SVHSHC_10460300 | AKT2         |  |  |  | 4.893E-01 |  |  |  |  |  |
| V3SVHSHC_7399286  | TMEM120B     |  |  |  | 4.916E-01 |  |  |  |  |  |
| V3SVHSHC_8905670  | PPP1R14C     |  |  |  | 4.924E-01 |  |  |  |  |  |
| V3SVHSHC_9532736  | DCSTAMP      |  |  |  | 4.927E-01 |  |  |  |  |  |
| V3SVHSHC_8382554  | IL15         |  |  |  | 4.930E-01 |  |  |  |  |  |
| V3SVHSHC_7702457  | OMG          |  |  |  | 4.934E-01 |  |  |  |  |  |
| V3SVHSHC_9804821  | ZNF565       |  |  |  | 4.943E-01 |  |  |  |  |  |
| V3SVHSHC_8089217  | CIDEB        |  |  |  | 4.952E-01 |  |  |  |  |  |
| V3SVHSHC_5396648  | BDH2         |  |  |  | 4.973E-01 |  |  |  |  |  |
| V3SVHSHC_7404764  | CYP1B1       |  |  |  | 4.975E-01 |  |  |  |  |  |
| V3SVHSHC_8254415  | OR52E2       |  |  |  | 4.976E-01 |  |  |  |  |  |
| V3SVHSHC_6564089  | SOAT1        |  |  |  | 4.984E-01 |  |  |  |  |  |
| V3SVHSHC_9795185  | ATRNL1       |  |  |  | 4.991E-01 |  |  |  |  |  |
| V3SVHSHC_8352326  | RDH13        |  |  |  | 4.997E-01 |  |  |  |  |  |

|                            |           |            |               |
|----------------------------|-----------|------------|---------------|
|                            |           |            |               |
| <b>Control (untreated)</b> | <b>HU</b> | <b>Dox</b> | <b>HU+Dox</b> |
| AAAS                       | AARSD1    | A4GNT      | A2ML1         |
| ABCG2                      | ABCA13    | AADAC      | AAED1         |
| ABR                        | ABCB6     | AAR2       | ABCA13        |
| ACAA2                      | ABCC4     | AARS       | ABCF2         |
| ACAT1                      | ACE       | ABCA3      | ABCG5         |
| ACBD4                      | ACSL5     | ABCC12     | ABHD12        |
| ACCSL                      | ACTC1     | ABHD13     | Acap3         |
| ACOT1                      | ACTR3     | ABR        | ACIN1         |
| ACOT9                      | ACTRT1    | ACAP1      | ACOT11        |
| ACSM2A                     | ACVR1B    | ACCSL      | ACOXL         |
| ACTC1                      | ADAM8     | ACE2       | ACRBP         |
| ACTG1                      | ADAMTS19  | ACOT7      | ACY3          |
| ACTN1                      | ADD1      | ACSF3      | ADAMTS10      |
| ACTN2                      | ADPRHL1   | ACSM3      | ADAMTSL1      |
| ACTN4                      | ADPRHL2   | ACSS1      | ADAMTSL3      |
| ACTR1B                     | ADRBK2    | ACTA1      | ADCK1         |
| ACTR8                      | AEBP1     | ACTC1      | ADH7          |
| ACTRT3                     | AFP       | ACTN1      | ADHFE1        |
| ACVR2B                     | AGAP5     | ACTR3C     | AGAP5         |
| ADAL                       | AGBL4     | ACTR6      | Agfg2         |
| ADAM15                     | AGXT      | ADAM29     | AGGF1         |
| ADAMTS19                   | AICDA     | ADAM8      | AGO4          |
| ADAMTS2                    | AIFM2     | ADAMTS9    | AGXT          |
| ADAMTS3                    | AIM2      | ADAMTSL2   | AHDC1         |
| ADCK1                      | AJAP1     | ADAT2      | AIMP2         |
| ADD3                       | AKAP3     | Adat3      | Akip1         |
| ADH1A                      | Aknad1    | ADCY4      | AKR1C3        |
| ADH4                       | ALDH3A1   | ADCY5      | AKT1          |
| ADORA2A                    | ALDH3B1   | ADCY6      | AKT1S1        |
| ADRA2C                     | ALOXE3    | ADD1       | ALDH1A3       |
| ADRBK1                     | ALPI      | ADHFE1     | ALDH4A1       |
| ADSS                       | AMER2     | ADIG       | ALDH6A1       |
| AFF1                       | AMIGO2    | ADIPOR1    | ALG6          |

|          |          |         |          |
|----------|----------|---------|----------|
| AGA      | ANAPC7   | ADORA2A | ALPP     |
| AGBL1    | ANGPTL4  | ADPRH   | AMIGO2   |
| AGBL2    | ANKLE2   | ADRBK1  | ANGPT4   |
| AGMAT    | ANKRD18A | AEBP2   | ANKH     |
| AGPAT9   | ANKRD37  | AFF3    | Ankle1   |
| AHSG     | ANKS1A   | AFTPH   | ANKRD1   |
| AIFM2    | ANP32A   | Agap1   | ANKRD13B |
| AIG1     | ANXA8L1  | AGBL4   | ANKRD30A |
| AIM1L    | APOBEC3F | AGK     | Ankrd52  |
| AK8      | APPBP2   | AGL     | ANKRD54  |
| AKAP14   | AQP1     | AGPAT6  | ANKRD60  |
| AKR1C1   | ARFIP1   | AHSG    | ANKRD62  |
| AKTIP    | ARHGAP40 | AIF1L   | ANXA1    |
| ALDH6A1  | ARHGAP9  | AIG1    | AP3B1    |
| ALG12    | ARHGEF7  | AIMP2   | AP3M2    |
| ALG14    | ARMCX5   | AKAP13  | APOA1BP  |
| ALLC     | ARRDC1   | AKAP8   | APOA5    |
| ALX3     | ARSA     | AKR1C2  | APOC2    |
| AMELY    | ARSF     | AKT2    | AQP5     |
| AMMECR1L | ASB4     | ALDH8A1 | AR       |
| AMN1     | ASB7     | ALDOB   | ARFGAP1  |
| AMTN     | ASB9     | ALKBH5  | ARFIP1   |
| ANAPC2   | ASIP     | ALKBH6  | ARFIP2   |
| ANGPTL4  | ASMTL    | ALKBH8  | ARHGEF11 |
| ANKFN1   | ASPA     | ALOX5AP | ARHGEF3  |
| Ankle1   | ASPH     | AMACR   | ARL14    |
| ANKRD13D | ATAD5    | AMELX   | ARL6IP5  |
| ANKRD34B | ATP11AUN | AMER2   | ARNT2    |
| ANKRD54  | ATP13A4  | AMFR    | ARPC3    |
| ANKRD55  | ATP5G2   | AMIGO1  | ARRDC5   |
| ANKRD66  | ATP6V0E1 | AMY1C   | ARSE     |
| ANKRD7   | ATXN2L   | ANG     | ASAH2B   |
| ANP32C   | AURKAIP1 | ANGEL2  | ASCC3    |
| ANXA2R   | B3GAT2   | ANGPT1  | ASF1B    |
| ANXA8L1  | B4GALNT4 | ANGPT4  | ASMTL    |

|          |          |           |          |
|----------|----------|-----------|----------|
| AP2B1    | BACE2    | ANKK1     | ASNSD1   |
| AP5S1    | BAG5     | ANKLE2    | Aspg     |
| APBB1    | BAIAP2   | ANKRD1    | ATF1     |
| APLN     | BANF1    | ANKRD20A2 | ATF7IP2  |
| APMAP    | BCKDHA   | ANKRD23   | ATL1     |
| APOA1BP  | BEST4    | ANKRD35   | ATL2     |
| Apobr    | BEX5     | ANKRD37   | ATP5O    |
| APOC4    | BFSP1    | ANKS1A    | ATP5SL   |
| APOL5    | BGLAP    | ANKS3     | ATP6V0E1 |
| APOL6    | BIRC7    | ANO6      | ATP6V1F  |
| AQP11    | BLZF1    | ANPEP     | ATP7A    |
| AQP4     | BNIP2    | ANXA13    | ATRAID   |
| AQP7     | BOLA2B   | ANXA7     | AVPR1A   |
| AQP8     | BPIFB3   | AOC3      | AVPR2    |
| AREL1    | BRD2     | AP3B1     | AXDND1   |
| ARF3     | BRD8     | AP5B1     | AXIN1    |
| ARF5     | BRF2     | AP5S1     | B3GALT1  |
| ARHGAP15 | BRSK1    | APAF1     | B4GALT5  |
| ARHGAP44 | BTG3     | APH1B     | B4GALT6  |
| ARHGDIG  | BTNL2    | API5      | BAGE3    |
| ARHGEF19 | BUB1     | APLN      | BAGE4    |
| ARID2    | C10ORF53 | APOB      | BAI2     |
| ARL11    | C10orf62 | APOBEC3A  | BAMBI    |
| ARL4D    | C11orf95 | APOH      | BAZ1A    |
| ARL8B    | C12orf49 | APOLD1    | BAZ1B    |
| ARMC5    | C15orf32 | AQP4      | BBIP1    |
| ARMCX5   | C15orf57 | AREL1     | BCAT2    |
| ARPC5L   | C17orf98 | ARF4      | BEX1     |
| ASPDH    | C18ORF25 | Arglu1    | BFSP1    |
| Aspg     | C19orf48 | ARHGAP19  | BIK      |
| ASTN2    | C19orf68 | ARHGAP22  | BLCAP    |
| ATE1     | C1orf106 | ARHGAP23  | BLVRB    |
| ATF6     | C1orf109 | ARHGAP42  | BMP10    |
| ATG16L2  | C1orf162 | ARHGAP6   | BMPR2    |
| ATIC     | C1orf194 | ARHGEF25  | BNC2     |



|           |           |          |           |
|-----------|-----------|----------|-----------|
| ATP10A    | C1orf56   | ARHGEF39 | BPI       |
| ATP1B4    | C1orf68   | ARID5B   | BRINP1    |
| ATP2B2    | C1QL4     | ARL17B   | BRSK2     |
| ATP6V1A   | C20ORF166 | ARL2BP   | BTBD11    |
| ATP7A     | C21ORF33  | ARL4D    | BTC       |
| ATPAF1    | C22orf46  | ARMC8    | BUD13     |
| AURKC     | C2cd4a    | ARMC9    | C10ORF76  |
| AXDND1    | C2ORF16   | ARNT2    | C12orf40  |
| B3GNT6    | C2orf61   | ARPC1B   | C12orf71  |
| B4GALT1   | C3AR1     | ARRDC3   | C12orf76  |
| B4GALT7   | C4orf33   | ARSE     | C14orf177 |
| BAAT      | C4ORF6    | ASB14    | C14ORF79  |
| BAD       | C5orf38   | ASB15    | C15orf32  |
| BAZ1B     | C5orf52   | ASB16    | C15orf53  |
| BCL6      | C5orf66   | ASB17    | C15orf54  |
| BDH2      | C6ORF165  | ASB18    | C15orf57  |
| Bend3     | C6orf183  | ASCL1    | C15orf61  |
| BMP2      | C6ORF89   | Asprv1   | C16orf72  |
| BMP6      | C8orf33   | ASS1     | C16orf93  |
| BPIFA2    | C8orf88   | ASXL3    | C16orf96  |
| BPIFB2    | C9orf16   | ATCAY    | C18ORF21  |
| BRDT      | C9orf163  | ATF6     | C19ORF18  |
| BRINP1    | C9orf169  | ATF6B    | C19orf35  |
| BRINP2    | CABLES1   | ATF7IP2  | C1GALT1   |
| BRSK2     | CACNA2D1  | ATIC     | C1GALT1C1 |
| BSN       | CACNB3    | ATOH7    | C1orf61   |
| BSND      | CACNG1    | ATP10D   | C1orf87   |
| BTF3      | CACNG8    | ATP13A2  | C1QTNF3   |
| C10orf113 | CADM3     | ATP2B4   | C1QTNF6   |
| C12orf45  | CALY      | ATP2C2   | C1QTNF7   |
| C12orf49  | CAMK2N1   | ATP4A    | C20ORF27  |
| C12ORF5   | CAPN6     | ATP4B    | C2ORF16   |
| C12orf57  | CAPZB     | ATP5S    | C2orf27B  |
| C14ORF166 | CARM1     | ATP6AP1  | C2orf42   |
| C15orf48  | CASK      | ATP6V0A2 | C3orf27   |

|           |          |          |          |
|-----------|----------|----------|----------|
| C15orf60  | CASP8    | ATP6V0C  | C3orf62  |
| C17orf112 | CASP9    | ATP6V0E1 | C6ORF25  |
| C17orf62  | CCDC107  | ATP9A    | C7ORF34  |
| C17orf67  | CCDC129  | ATRX     | C7orf60  |
| C19ORF12  | CCDC17   | AVIL     | C7orf62  |
| C19orf38  | CCDC64   | AVL9     | C9orf139 |
| C1orf105  | CCDC80   | B2M      | C9ORF37  |
| C1orf123  | CCL11    | B3GNT2   | C9orf92  |
| C1orf127  | CCL19    | B4GALNT4 | CA13     |
| C1orf194  | CCNC     | BAGE     | CA6      |
| C1orf198  | CCND2    | BAGE2    | CACHD1   |
| C1orf229  | CCNJ     | BAGE5    | CACNA1A  |
| C1orf234  | CD300C   | BAI1     | CACNA1B  |
| C1QL3     | CD74     | BAIAP2L2 | CACNA1I  |
| C1QTNF4   | CD79B    | BAIAP3   | CACNB1   |
| C1RL      | CD86     | BAK1     | CACNB2   |
| C20ORF166 | CD8B     | BBOX1    | CACNG7   |
| C20ORF85  | CDC25C   | BBS10    | CALCRL   |
| C21ORF62  | CDC34    | BBS5     | CALML5   |
| C22orf24  | CDC42EP3 | BCL9     | CALML6   |
| C2orf54   | CDH6     | BCL9L    | CAPN10   |
| C3orf27   | CDHR1    | BCOR     | CAPN12   |
| C3orf36   | CDK19    | BDH2     | CAPN3    |
| C5orf24   | CDKL3    | BEST1    | CAPS     |
| C5orf55   | CDPF1    | BGN      | CAPZA1   |
| C6ORF15   | CDR2     | BIRC6    | CARD14   |
| C6orf7    | CECR2    | BIRC7    | CARD9    |
| C8orf82   | CELSR1   | BLOC1S3  | CARNS1   |
| C9orf163  | CELSR2   | BMP4     | CASP16   |
| C9ORF9    | CEMIP    | BMP7     | CBFB     |
| C9orf92   | CEP164   | BOD1L2   | CBWD2    |
| CA1       | CEP57L1  | BOK      | CBX6     |
| CA3       | CGB1     | BOLA1    | CCDC121  |
| CACNA1C   | CGB8     | Bpifb6   | CCDC22   |
| CACNG3    | CHAF1A   | BRINP1   | CCDC28B  |

|          |         |           |          |
|----------|---------|-----------|----------|
| CALCOCO1 | CHD9    | BRSK1     | CCDC33   |
| CALCOCO2 | CHIC2   | BRSK2     | CCDC68   |
| CAMK2B   | Chpf2   | BSX       | CCDC82   |
| CAMK2N1  | CHRNA9  | BTAF1     | CCDC87   |
| CAMK2N2  | CIB3    | BTG2      | CCKBR    |
| Camsap3  | CITED2  | BTLA      | CCL28    |
| CAPN1    | CLCN6   | BTN3A3    | CCL3L1   |
| CAPN9    | CLCNKA  | BTNL10    | CCNG1    |
| CASP12   | CLEC2A  | BUB1B     | CD248    |
| CASP7    | CLEC2L  | C10ORF11  | CD276    |
| CASZ1    | CLEC6A  | C10ORF91  | CD300LD  |
| CATIP    | CLEC9A  | C11orf21  | CD40LG   |
| CAV1     | CLIP1   | C11ORF31  | CD47     |
| CBFB     | CLN6    | C11orf58  | CD6      |
| CBR1     | CLPTM1L | C11orf70  | CD79B    |
| CBWD7    | CLUL1   | C11orf82  | CD9      |
| CCDC104  | CMTM6   | C11orf87  | CDADC1   |
| CCDC127  | CNDP2   | C11orf95  | CDC14A   |
| CCDC140  | CNOT7   | C12ORF10  | CDC42BPG |
| CCDC149  | CNTF    | C12orf40  | CDCP1    |
| CCDC178  | COL13A1 | C12orf43  | CDH17    |
| CCDC30   | COL25A1 | C12orf50  | CDH2     |
| Ccdc39   | COL9A2  | C12orf65  | CDHR3    |
| CCDC64   | COPS2   | C12orf80  | CDK3     |
| CCDC79   | COQ7    | C14ORF1   | CDKL5    |
| CCDC86   | COX6B1  | C14ORF2   | CDY2B    |
| CCDC87   | COX7A2L | C15orf54  | CEACAM4  |
| CCDC92   | CPNE4   | C15orf56  | CECR6    |
| CCK      | CPO     | C15orf57  | CENPO    |
| CCL13    | CREBZF  | C15orf61  | CEP250   |
| CCL14    | CRY1    | C16orf74  | CEP85L   |
| CCL20    | CRYBA4  | C17orf104 | CERCAM   |
| CCL24    | CRYGA   | C17orf70  | CES3     |
| CCL25    | CSNK1G3 | C17orf75  | CFL2     |
| CCL5     | CSNK2A3 | C17orf78  | CHD6     |

|          |           |           |         |
|----------|-----------|-----------|---------|
| CCNB2    | CSTF1     | C17orf80  | CHL1    |
| CCNG2    | CSTF2T    | C17orf98  | CHRM3   |
| CCR9     | CT47A8    | C18orf56  | CIART   |
| CD160    | CT83      | C19ORF26  | CIDEC   |
| CD302    | CTIF      | C19orf33  | CISD3   |
| CD37     | CTNNB1    | C1GALT1   | CLCN6   |
| CD68     | CTRC      | C1orf112  | CLCNKB  |
| CD69     | CTSG      | C1orf159  | CLDN1   |
| CD70     | CTTNBP2NL | C1orf168  | CLDN15  |
| CD81     | CUEDC2    | C1orf95   | CLDN16  |
| CD83     | Cul9      | C1QTNF5   | CLDN18  |
| CDC20B   | CXCL6     | C1R       | CLDND1  |
| CDC37    | CXCL9     | C1RL      | CLEC17A |
| CDH18    | CXorf57   | C1S       | CLEC2A  |
| CDH19    | CYB5RL    | C20orf196 | CLEC4G  |
| CDH26    | CYP2C9    | C20ORF85  | CLEC4M  |
| CDK11A   | CYP2D6    | C21ORF58  | CLIC3   |
| CDK2     | CYP7B1    | C2cd2     | CLINT1  |
| CDR2     | DAGLA     | C2orf40   | CLIP1   |
| CDR2L    | DAPK1     | C2orf47   | CLPB    |
| CECR2    | DCDC2C    | C2orf49   | CMTM5   |
| CEP250   | DDA1      | C2orf69   | CNGA2   |
| CFDP1    | DDX47     | C2orf81   | CNST    |
| CHD6     | DEFA4     | C2orf88   | CNTF    |
| CHIC2    | DEFB104A  | C3AR1     | CNTN3   |
| CHML     | DEFB107A  | C4orf26   | COL14A1 |
| CHMP3    | DEFB123   | C4orf27   | COL16A1 |
| CHRD12   | DEFB131   | C5AR2     | COL1A2  |
| CHRFAM7A | DENND3    | C5orf22   | COL24A1 |
| CHST5    | DET1      | C5orf51   | COL25A1 |
| CIRBP    | DGKG      | C5orf54   | COL26A1 |
| CLCN2    | DGKK      | C5orf60   | COL2A1  |
| CLDN10   | DHCR24    | C6        | COPRS   |
| CLDN6    | DHTKD1    | C6ORF195  | COPS2   |
| CLEC16A  | DHX40     | C8orf76   | COX16   |

|         |          |          |          |
|---------|----------|----------|----------|
| CLIP1   | DLG1     | C9orf169 | COX7A1   |
| CLK4    | DLX1     | C9ORF72  | CPO      |
| CLPP    | DNAJB4   | C9ORF78  | CPSF4L   |
| CLTA    | DNAJB7   | C9ORF84  | CRISP1   |
| CNIH1   | Dnajc30  | C9ORF85  | CSF1R    |
| CNNM1   | DNALI1   | C9ORF89  | CSMD1    |
| CNNM3   | DNASE1L1 | C9ORF9   | CSNK1G1  |
| CNOT11  | DNM3     | C9ORF91  | CSNK2A1  |
| CNTNAP4 | DOCK1    | CA7      | CTNNB1   |
| CNTROB  | DPCR1    | CACFD1   | CUL4A    |
| COA6    | DUOXA2   | CACNA1E  | CXCL14   |
| COL26A1 | DUSP26   | CACNA1F  | CXCL3    |
| COL28A1 | DUT      | CACNB1   | CXCR4    |
| COL3A1  | DVL2     | CALHM1   | CYB561   |
| COPS2   | DYDC1    | CALHM3   | CYBA     |
| CORO2B  | DZANK1   | CALML5   | CYFIP1   |
| COX19   | EBAG9    | CAMP     | CYP1A1   |
| COX6B2  | EBI3     | CARD14   | CYP46A1  |
| CPE     | EDN3     | CARD16   | CYR61    |
| CPLX3   | EEF2     | CARD18   | DAZAP2   |
| CPNE8   | EFCAB13  | CARHSP1  | Dcaf8    |
| CRADD   | EGFR     | Carkd    | DCP1B    |
| CRAT    | EHD1     | CASC10   | DCT      |
| CRCP    | EHD4     | CASKIN1  | DDX3X    |
| CREB3L2 | EIF3F    | CASQ1    | DEFB103A |
| CRELD2  | EIF3H    | CASQ2    | DEFB116  |
| CRIP2   | ELAVL4   | CATSPERG | DEFB131  |
| CRLF3   | ELP5     | CBFA2T2  | DENND1C  |
| CRTAP   | EML3     | CBX6     | DENND4A  |
| CSF1    | ENDOG    | CCBE1    | DFNA5    |
| CSNK1G2 | ENTPD8   | CCDC104  | DGKI     |
| CSNK2A2 | EPN2     | CCDC107  | DGKK     |
| CSRNP3  | EPS15    | CCDC115  | DHCR24   |
| CST3    | EPT1     | CCDC120  | DHRS4    |
| CST6    | EQTN     | Ccdc138  | DHRS7C   |

|          |          |         |         |
|----------|----------|---------|---------|
| CST7     | ERBB2IP  | CCDC166 | DHX36   |
| CT45A2   | EREG     | CCDC168 | DIABLO  |
| CT47A9   | ERICH2   | CCDC174 | DIDO1   |
| CTAG1B   | ESR2     | CCDC177 | DIRAS2  |
| CTBP1    | EXOC1    | CCDC178 | DIS3L   |
| CTNNA2   | EZH1     | CCDC27  | DLGAP1  |
| Cul9     | F2RL1    | CCDC36  | Dlgap5  |
| CX3CR1   | FABP5    | CCDC54  | Dlk2    |
| CXCL1    | FAM107B  | CCDC59  | DMC1    |
| CXCR4    | FAM127A  | CCDC68  | DNAH8   |
| CXorf57  | FAM134B  | CCDC85A | DNAJB4  |
| CYB561D1 | Fam150a  | CCDC90B | DNAJC10 |
| CYB5D2   | FAM151A  | CCL2    | DNASE2B |
| CYB5R4   | FAM160B2 | CCL22   | DNMT1   |
| CYP2A7   | FAM166A  | CCL3L3  | DOCK11  |
| DAGLA    | Fam181b  | CCM2L   | DPH1    |
| DAGLB    | FAM189A2 | CCNDBP1 | DPY19L2 |
| DALRD3   | FAM189B  | CCNF    | DPYSL3  |
| DARS     | FAM195B  | CCNY    | DRD1    |
| DAXX     | FAM198B  | CCRL2   | DSCAM   |
| DBH      | FAM217A  | CCZ1B   | DSCR3   |
| DBR1     | FAM46A   | CD151   | DTD1    |
| DCAF15   | FAM65A   | CD1B    | DTWD2   |
| Dcaf17   | FAM69C   | CD1E    | DUOX1   |
| DCDC5    | FAM83D   | CD207   | DUSP1   |
| DCPS     | FAM86C1  | CD226   | DUSP2   |
| DCTN2    | FASTKD5  | CD2AP   | DUSP21  |
| DCUN1D2  | FBLN7    | CD302   | DUSP26  |
| DDX47    | FBXL12   | CD4     | DUSP3   |
| DDX51    | FBXL5    | CD40    | DUSP5   |
| DDX58    | FBXO21   | CD69    | DZIP1L  |
| DEFB104A | FBXW9    | CD82    | E2F7    |
| DEFB115  | FCRL4    | CD93    | Eapp    |
| DEFB118  | FCRL6    | CDC14B  | EDEM1   |
| DEFB128  | FEM1C    | CDC25C  | EDRF1   |

|         |           |          |           |
|---------|-----------|----------|-----------|
| DEFB4B  | FEZF2     | CDC42BPG | EEA1      |
| DENND6B | FGFBP1    | CDC42SE2 | EFCC1     |
| DERA    | FGG       | CDCA7L   | EGFL6     |
| DGKI    | FGR       | CDH10    | EGLN2     |
| DGUOK   | FHL5      | CDH18    | EGLN3     |
| DIABLO  | FILIP1L   | CDK10    | EHD3      |
| DIAPH2  | FKBP14    | CDK2     | EIF3H     |
| DIAPH3  | FKBP15    | CDK3     | EIF4ENIF1 |
| DIO3    | FKTN      | CDK5     | ELAC2     |
| DIP2B   | FLNC      | CDK5R1   | ELF2      |
| DIRC2   | FOS       | CDKN3    | ELFN2     |
| DIS3L2  | FOSL2     | CDRT15   | ELL2      |
| DISP1   | FOXC1     | CDY2A    | ELMOD2    |
| DLX3    | FOXI1     | CEACAM16 | ELOVL7    |
| DMD     | FOXL1     | CEACAM19 | EMC4      |
| DMTN    | FRAT2     | CEACAM5  | EML2      |
| DNAJA3  | FRMD8     | CEBPD    | EML4      |
| DNAJB1  | FRRS1L    | CECR1    | EMR1      |
| DNAJB12 | FUCA1     | Cela1    | ENKD1     |
| DND1    | FUT6      | Celf4    | ENPEP     |
| DNM3    | FXYP4     | CEP128   | ERBB2IP   |
| DOPEY1  | G0S2      | CEP170B  | ERGIC2    |
| Dpy30   | GABARAPL1 | CEP55    | Ermn      |
| DQX1    | GABBR1    | CEP57    | ERP44     |
| DRD5    | GAGE12J   | CERCAM   | ESPNL     |
| DSC1    | GAL3ST1   | CERKL    | ESYT3     |
| DSCAML1 | GALNT1    | Cers2    | ETV7      |
| DSCC1   | GALNT8    | CFL1     | EVA1A     |
| DSG2    | GAPDHS    | CGRRF1   | F11R      |
| DSP     | GAPT      | CHAMP1   | F8A1      |
| DTWD2   | GAS7      | CHCHD6   | FAAH2     |
| DYNAP   | GATS      | CHCHD7   | FADD      |
| DYNLRB2 | GATSL3    | CHD1     | FADS3     |
| DZANK1  | GBE1      | CHDC2    | FAM101A   |
| EARS2   | GCA       | CHGA     | FAM103A1  |

|         |          |         |          |
|---------|----------|---------|----------|
| EBF4    | GCHFR    | CHI3L2  | FAM110B  |
| EBI3    | GDI2     | CHIA    | FAM120A  |
| EBPL    | GFI1     | CHPT1   | Fam131c  |
| ECI1    | GFPT2    | CHRA1   | FAM153B  |
| EDDM3A  | GGT6     | CHRD2   | Fam154b  |
| EDDM3B  | GIF      | CHRM1   | FAM155A  |
| EDF1    | GIN1     | CHRM4   | FAM160B2 |
| EED     | GJA4     | CHRNA6  | FAM19A5  |
| EEF1E1  | GJA5     | CHST10  | FAM209A  |
| EEF1G   | GJC2     | CHST12  | FAM20C   |
| EFCAB4B | GK       | CHST2   | FAM217A  |
| Efcab9  | GLI3     | CHST8   | FAM43B   |
| EFHB    | GLIPR1L1 | CIART   | FAM49B   |
| EGFR    | GLIS2    | CIB3    | Fam71e1  |
| EHBP1L1 | GM2A     | Cisd2   | FASLG    |
| EHMT2   | GNA14    | CITED2  | FBLN7    |
| EIF1    | GNG13    | CKM     | FBXL17   |
| EIF3H   | GNLY     | CLCN4   | FBXL4    |
| ELAVL1  | GOLPH3   | CLCNKB  | FBXL8    |
| ELAVL3  | GOSR1    | CLDN17  | FBXO32   |
| ELF1    | GPN2     | CLDN19  | FBXO48   |
| ELP2    | GPR126   | CLDND1  | FBXO9    |
| EMD     | GPR133   | Clec18a | FBXW5    |
| EML2    | GPR137   | CLEC2L  | FER1L6   |
| EPHA3   | GPR137B  | CLEC3A  | FFAR4    |
| EPHB6   | GPR182   | CLEC4E  | FGD6     |
| EPHX3   | GPR20    | CLEC4M  | FGF9     |
| EPS15L1 | GPR55    | CLSPN   | FGFR3    |
| EPS8L3  | GPR68    | CLSTN2  | FHAD1    |
| ERCC5   | GPS2     | CLTA    | FILIP1L  |
| Ercc6l  | GPX8     | CLTC    | FKBP15   |
| ERGIC2  | GRB7     | CLVS1   | FOXD4L5  |
| Ermn    | Greb1l   | CMAS    | FOXJ3    |
| ERO1LB  | GRP      | CMTM3   | FOXL2    |
| ESM1    | GRPEL2   | CNDP2   | FOXS1    |



|          |           |          |          |
|----------|-----------|----------|----------|
| ESRP2    | GRXCR1    | CNEP1R1  | FRMD5    |
| ESYT3    | GSPT1     | CNGB1    | FRYL     |
| ETFA     | GSPT2     | CNIH1    | FSCN2    |
| ETFDH    | GSTM3     | CNN2     | FSTL1    |
| ETNK1    | GSTT2B    | CNR2     | FUT11    |
| ETV4     | GTPBP6    | CNTN6    | FYN      |
| EVA1B    | H2AFY     | CNTNAP3B | G0S2     |
| EXD1     | H2BFM     | COA1     | G6PC3    |
| EXT2     | HAPLN1    | COG2     | GAD2     |
| F2       | Haus7     | COG3     | GALNT1   |
| F3       | Haus8     | COL2A1   | GAPDHS   |
| F7       | HBG1      | COL3A1   | GAS2L2   |
| F8A3     | HCAR1     | COL7A1   | GAS2L3   |
| FAAH2    | HCFC2     | COL8A1   | GCM1     |
| FABP2    | HEATR3    | COMP     | GCSAML   |
| FABP5    | HELLS     | COPS2    | GDAP2    |
| FADS2    | HERPUD1   | CORO1B   | GGN      |
| FAF2     | HES2      | CORO2B   | GHR      |
| FAM101B  | HIAT1     | COX20    | GIMAP7   |
| FAM109A  | HIBCH     | COX5A    | GJC3     |
| FAM118B  | HIF1AN    | COX6B1   | GKAP1    |
| FAM175A  | HIST1H1T  | COX7A2   | GLB1L3   |
| FAM177A1 | HIST2H2BE | CPA3     | GLRA2    |
| FAM19A3  | HLA-DOB   | CPNE5    | GLRX2    |
| FAM20C   | Hm13      | CPO      | GLT1D1   |
| FAM24A   | HNRNPD    | CPXM2    | GMEB1    |
| FAM26E   | HNRNPH1   | CRB1     | GMNN     |
| FAM47A   | HNRNPU    | CREB5    | GNPNAT1  |
| FAM50B   | HOMER1    | CRK      | GOLGA1   |
| FAM65A   | HOXA7     | CRNN     | GOLGA6L4 |
| FAM69C   | HOXD8     | CRTC2    | GP9      |
| FAM71E2  | HPDL      | CRX      | GPC1     |
| FAM72A   | HPGDS     | CRYAB    | GPN3     |
| FAM8A1   | HS3ST6    | CRYGB    | GPR112   |
| FAM90A1  | HSD17B4   | CRYL1    | GPR162   |

|        |         |            |          |
|--------|---------|------------|----------|
| FAM96B | HSPB8   | CSAG1      | GPR182   |
| FAT2   | HSPG2   | CSF1       | GPR34    |
| FAT3   | HTN1    | CSF1R      | GPR65    |
| FBLN2  | IDH3G   | CSF2RB     | GPR68    |
| FBXO31 | IFNL3   | CSGALNACT2 | GRIN2A   |
| FCAMR  | IGF2BP3 | CSH2       | GRINA    |
| FCF1   | IGFALS  | CSN2       | GRM2     |
| FCHSD2 | IKZF4   | CSNK1A1    | GSG1     |
| FDCSP  | IL17D   | CSNK1D     | GSK3B    |
| FERD3L | IL1RL1  | CT45A2     | GSPT1    |
| FGF13  | IL22    | CT45A3     | GSTO1    |
| FGF18  | IL23A   | CT45A4     | GTF2B    |
| FGF19  | IL3     | CT47A8     | GTF2H1   |
| FGFBP2 | IL5     | CT47B1     | GZMM     |
| FHL2   | IMPAD1  | CTAGE15    | H2AFX    |
| FIGNL1 | INF2    | CTAGE9     | HAGHL    |
| FIS1   | INPP4A  | CTBP2      | HAVCR2   |
| FITM1  | INPP5D  | CTBS       | HBA2     |
| FKBP14 | IRS4    | CTLA4      | HCAR3    |
| FKBP3  | IRX5    | CTNNB1     | HDAC2    |
| FLAD1  | ISM2    | CTPS2      | HDGFRP3  |
| FMO5   | ISPD    | CTSF       | HDLBP    |
| FNDC3A | ISX     | CTSW       | HEPHL1   |
| FNDC9  | ITPR2   | CUL5       | HERC5    |
| FNIP2  | JADE3   | CUTA       | HFM1     |
| FOSB   | JPH3    | CXCL9      | HGS      |
| FOSL1  | KANSL1L | CXCR4      | HLA2     |
| FOXA1  | KAT6A   | CXORF23    | HIC2     |
| FOXG1  | KATNAL2 | CXorf58    | HINFP    |
| FOXJ1  | KBTBD6  | CYB561D2   | HJURP    |
| FO XK1 | KCMF1   | CYB5B      | HLA-DOA  |
| FOXN1  | KCNA6   | CYB5D1     | HLA-DPB1 |
| FOXO3  | KCNB2   | CYBA       | HLA-DRB4 |
| FOXR2  | KCNE4   | CYP1A2     | HLA-F    |
| FREM1  | KCNH2   | CYP1B1     | HMG2     |

|           |             |          |          |
|-----------|-------------|----------|----------|
| FREM3     | KCNK1       | CYP24A1  | HOMER1   |
| FRS3      | KCNRG       | CYP26A1  | HOPX     |
| FSCN1     | KCNS2       | CYP27B1  | HOXA7    |
| FSD2      | KCTD10      | CYP2A7   | HOXB2    |
| FST       | KDELC1      | CYP2C18  | HOXB4    |
| FTMT      | KDM5C       | CYP2J2   | HOXB5    |
| FUT5      | KDR         | DACT1    | HOXD9    |
| FXVD6     | KDSR        | DAPK1    | HPS6     |
| FYN       | KIAA0408    | DAPK2    | HRSP12   |
| G0S2      | KIAA1024L   | DAXX     | HS6ST2   |
| GABARAPL1 | KIAA1147    | DAZ2     | HSD11B1  |
| GABBR1    | KIAA1244    | DAZAP2   | HSD11B1L |
| GABPB1    | KIAA1324L   | DCAF12L2 | HSFY1    |
| GABRA6    | KIAA1377    | DCHS1    | Hspa13   |
| GABRG2    | KIAA1432    | DCLRE1B  | HSPA14   |
| GABRP     | KIAA1462    | DCUN1D2  | HSPA6    |
| GAGE4     | KIAA1683    | DDO      | HSPBAP1  |
| GAGE8     | KIF11       | Ddrgk1   | HTR2C    |
| GALC      | KIF27       | DDTL     | HTRA1    |
| GARS      | KIFAP3      | DDX11    | HYAL1    |
| GBP2      | KIT         | DDX26B   | HYAL4    |
| GCFC2     | KLF12       | DDX43    | HYI      |
| GCM1      | KLHDC2      | DDX51    | HYPK     |
| GDF2      | KLHDC7A     | DEFA1B   | IDH3G    |
| GDF6      | KLHL1       | DEFB104B | IDO1     |
| GDPD1     | KLHL13      | DEFB107A | IFNA2    |
| GEMIN8    | KLHL26      | DEFB121  | IFNL1    |
| GFRAL     | KLHL29      | DEFB127  | IGFBP7   |
| GIP       | KLHL4       | DENND6A  | IGFL3    |
| GJA4      | KLHL6       | DERA     | IGJ      |
| GJC1      | KLRC4-KLRK1 | DERL1    | IL12RB2  |
| GLRA3     | KLRD1       | DERL2    | IL21R    |
| GLTSCR1L  | KLRG2       | DESI2    | IL27RA   |
| GMEB2     | KLRK1       | DFFB     | IL6ST    |
| GMNN      | KRAS        | DGCR14   | IMMT     |

|              |              |          |           |
|--------------|--------------|----------|-----------|
| GNA12        | Krt222       | DGKE     | IMPAD1    |
| GNAT1        | KRT25        | DGKI     | INHA      |
| GNL3         | KRT35        | DHCR7    | INPP4B    |
| GNL3L        | KRT71        | DHDH     | INSIG1    |
| GNS          | KRT75        | DHPS     | IRAK3     |
| GOLGA5       | KRTAP10-7    | DHRS3    | IRX3      |
| GOLGB1       | KRTAP2-2     | DHRS4L2  | ITGB5     |
| GOT2         | KRTAP2-3     | DIDO1    | ITGB7     |
| Gpank1       | KRTAP4-11    | DISP2    | JAK3      |
| GPATCH2L     | KRTAP4-2     | DLG3     | KAAG1     |
| GPBP1        | KRTAP5-5     | DLGAP1   | KANSL1L   |
| GPR113       | KRTAP5-9     | DLL3     | KAT2B     |
| GPR126       | KRTAP7-1     | DLX1     | KAT6B     |
| GPR132       | KRTAP9-1     | DMBT1    | KAZN      |
| GPR137B      | Krtdap       | DMTN     | KCNA5     |
| GPR171       | LACTB2       | DNAI1    | KCNK2     |
| GPR31        | LAMB4        | DNAJA1   | Kcnu1     |
| GPR83        | LAMC2        | DNAJA2   | KCNV2     |
| GPRC5B       | LAT2         | DNAJB1   | KCTD17    |
| GPRIN1       | LCMT2        | DNAJB6   | KDELC2    |
| GPT2         | LDB1         | DNAJB7   | KIAA0226L |
| GRB10        | LEKR1        | DNAJB8   | KIAA0319L |
| GRIA4        | LEMD3        | DNAJC17  | KIAA0391  |
| GRIN2B       | LGALS7       | DNAJC22  | KIAA0513  |
| GRIN3A       | LHCGR        | DNASE1L3 | KIAA0586  |
| GRK4         | LHFPL3       | DNASE2   | KIAA0895  |
| GRXCR1       | LHPP         | DNASE2B  | KIAA1024  |
| GRXCR2       | LMO2         | DNMT3L   | KIAA1244  |
| GS1-259H13.2 | LMOD3        | DOCK1    | KIF18B    |
| GSG1         | LOC100130357 | DOK1     | KIF27     |
| GSS          | LOC100130705 | DOPEY1   | KIF5B     |
| GSTM5        | LOC100132731 | DPF1     | KIFAP3    |
| GTF2H3       | LOC100288562 | DPF3     | KLC2      |
| GUCA1B       | LOC100505478 | DPP7     | KLF2      |
| GYG1         | LOC100652807 | DPPA5    | KLHDC2    |

|            |              |         |                  |
|------------|--------------|---------|------------------|
| GYPC       | LOC100996720 | DRC1    | KLHL6            |
| GYS1       | LOC100996906 | DRD5    | KLK13            |
| H2AFJ      | LOC101059976 | DSC1    | KNG1             |
| HAS1       | LOC101060588 | DSCAM   | KPRP             |
| HAVCR1     | LOC101060861 | DSG2    | KRAS             |
| HCAR2      | LOC101927989 | DSP     | KRIT1            |
| HCN1       | LOC101928291 | DTWD1   | KRT1             |
| HEATR2     | LOC101928892 | DUOXA2  | KRT6A            |
| HEATR5B    | LOC101928951 | DUS4L   | KRT72            |
| HERPUD1    | LOC101929264 | DUSP26  | KRT86            |
| HEY2       | LOC101929451 | DUSP8   | KRTAP11-1        |
| HIPK2      | LOC101929725 | DVL2    | KRTAP12-4        |
| HIRIP3     | LOC101929829 | DVL3    | KRTAP13-1        |
| HIST1H1C   | LOC101929950 | DYDC1   | LAMA1            |
| HIST1H2BA  | LOC101930085 | DYNC2H1 | LANCL3           |
| HIST2H2AA4 | LOC101930300 | DYNLRB2 | LAT2             |
| HJURP      | LOC101930400 | DYNLT3  | LCE5A            |
| HK2        | LOC101930432 | EBF2    | LCN2             |
| HK3        | LOC101930553 | ECHDC2  | LDHAL6A          |
| HLA-DRA    | LOC101930592 | EDEM1   | LDHB             |
| HLA-F      | LOC645177    | EDEM2   | LDHD             |
| HMGB3      | LOC645202    | EEA1    | LEFTY1           |
| HMGN2      | LOC651959    | EFCAB13 | LEMD2            |
| HOMER1     | LOC729458    | EFCAB3  | LGMN             |
| HOXC13     | LOC730159    | EFCAB7  | LHFPL5           |
| HOXD11     | LOXL1        | EFHC1   | LHX3             |
| HRASLS5    | LPL          | EFNA3   | LIMA1            |
| Hrct1      | LRCH4        | EFNB2   | LMAN1L           |
| HRH1       | Lrit1        | EGFL6   | LMBR1L           |
| HRH3       | LRP2         | EIF2AK2 | LMTK2            |
| HS2ST1     | LRRC10B      | EIF3H   | LMTK3            |
| HSF1       | LRRC14B      | EIF4A1  | LOC1001293<br>61 |
| HSF4       | LRRC37B      | EIF4E3  | LOC1001303<br>01 |
| HSPA1A     | LRRC43       | ELAC2   | LOC1001303<br>57 |
| HSPB7      | LRRC52       | ELF3    | LOC1001320<br>04 |

|         |          |         |              |
|---------|----------|---------|--------------|
| HTN3    | LRRTM3   | ELMO3   | LOC100292952 |
| HTR1D   | LSM11    | ELMOD2  | LOC100293704 |
| HTR3B   | LSMEM1   | EMC10   | LOC100505549 |
| HTR3D   | LTB4R2   | EMD     | LOC100509091 |
| HYPK    | LURAP1L  | EMP1    | LOC100996318 |
| ICAM1   | Ly6g6f   | EMR1    | LOC100996350 |
| IDH3G   | LYPD4    | ENKD1   | LOC100996405 |
| IDO2    | MAD1L1   | ENPP3   | LOC100996415 |
| IDUA    | MAFF     | EPHA1   | LOC100996619 |
| IFNA1   | MAK      | EPHB2   | LOC100996844 |
| IFNA10  | MAN2B2   | EPO     | LOC101059976 |
| IFNA2   | MANSC1   | EPRS    | LOC101060022 |
| IFNL4   | MAP1A    | ERAL1   | LOC101060275 |
| IGF1    | MAP4K1   | ERCC8   | LOC101060400 |
| IGLL5   | MAPK8IP2 | ERICH1  | LOC101927594 |
| IGSF5   | MARS2    | ERICH4  | LOC101927614 |
| IL11    | MCC      | ERICH6  | LOC101927848 |
| IL17B   | MCCD1    | Erlec1  | LOC101928044 |
| IL22RA2 | MCTP1    | ERLIN2  | LOC101928498 |
| IL23A   | MEAF6    | ESAM    | LOC101928728 |
| IL2RB   | MESP2    | ESPN    | LOC101929702 |
| IL31RA  | METTL9   | ETNK2   | LOC101929725 |
| IL34    | Mex3b    | EXOSC3  | LOC101929803 |
| IL36A   | MFI2     | EYA3    | LOC101929804 |
| IL36G   | MLLT3    | EYS     | LOC101930075 |
| IMPA1   | MLPH     | F13B    | LOC101930154 |
| IMPAD1  | MLST8    | F2      | LOC101930400 |
| INF2    | MMP16    | F9      | LOC101930551 |
| ING1    | MMS19    | FADS2   | LOC285500    |
| ING5    | Mob1b    | FADS6   | LOC391722    |
| INHBB   | MOSPD1   | FAIM3   | LOH12CR1     |
| INSR    | MPC1     | FAM110A | LOXL1        |
| IPO4    | MPHOSPH8 | FAM110C | LRIG3        |
| IQCC    | MPO      | FAM110D | Lrrc16a      |

|          |           |          |            |
|----------|-----------|----------|------------|
| IQCD     | MRE11A    | FAM133A  | LRRC25     |
| Iqcf5    | MRPL10    | FAM151B  | LRRC30     |
| IQGAP2   | MRPL36    | FAM156A  | LRRC43     |
| IRAK1    | MRPL48    | FAM160A1 | LRRC49     |
| IRF2     | MS4A12    | FAM163A  | LRRC61     |
| IRX5     | Ms4a15    | FAM188B  | LRRC70     |
| ISL1     | MSC       | FAM195B  | LSM12      |
| ISL2     | MSLN      | FAM196B  | LSM4       |
| ITGAD    | Mst4      | FAM19A1  | LSMEM1     |
| IVL      | MTBP      | FAM200B  | LY75-CD302 |
| Izumo2   | MTMR9     | FAM206A  | LY9        |
| JADE1    | MTNR1B    | FAM209B  | LYPD1      |
| JAG2     | MTRNR2L10 | FAM229A  | LYPLA2     |
| JAM3     | MTRNR2L4  | FAM25A   | LYRM7      |
| KCNAB3   | MTX2      | FAM45A   | LYVE1      |
| KCNB2    | MUC13     | FAM53B   | MAFA       |
| KCNE2    | MUC3B     | FAM65A   | MAGEA10    |
| KCNG4    | MX2       | FAM76B   | MAN2B2     |
| KCNH3    | MYH10     | FAM78A   | MAP3K1     |
| KCNH5    | MYL7      | FAM78B   | MAP3K6     |
| KCNJ9    | MYO1C     | FAM83B   | MAPKAPK3   |
| KCNK16   | MYO3A     | FAM98A   | MARCH2     |
| KCNS2    | MYO5B     | FAM9B    | MARCH4     |
| KCTD14   | MYO7B     | FANCL    | MARK1      |
|          |           |          | MB         |
|          |           |          | MCAT       |
| KCTD21   | N6AMT1    | FARP2    | MCC        |
| KDM6B    | NAB1      | FAT3     | MCF2       |
| KDR      | NAMPT     | FBN2     | MCHR1      |
| KIAA0408 | NANOS1    | FBN3     | MCM5       |
| KIAA0513 | NCAPG     | FBXO36   | MCOLN1     |
| KIAA0922 | NDUFA11   | FBXO46   | MEAF6      |
| KIAA0947 | NDUFA13   | FCER1G   | MED1       |
| KIAA1033 | NDUFA4L2  | FCGR1B   | MEIG1      |
| KIAA1045 | NDUFV2    | FCGR3A   | MFAP3      |

|           |         |          |          |
|-----------|---------|----------|----------|
| KIAA1211  | NECAB2  | FCGR3B   | MGARP    |
| KIAA1244  | NETO2   | FCHSD2   | MGMT     |
| KIAA1279  | NEUROG2 | FCRL1    | MIER2    |
| KIAA1755  | NFATC1  | FERMT1   | MLLT3    |
| KIDINS220 | NFE2L1  | FEV      | MLLT4    |
| KIF2B     | NFKB2   | FEZ2     | MMADHC   |
| KIFC1     | NFKBIB  | FGF10    | MMD      |
| KIR3DL1   | NGRN    | FGF9     | MMP13    |
| KLF17     | NHEJ1   | FGFBP3   | MMS19    |
| KLF9      | NKAPL   | FGFR3    | MORC2    |
| KLHL13    | NLRP14  | FGL2     | MPEG1    |
| KLHL33    | NLRP3   | FHAD1    | MPHOSPH9 |
| KLHL6     | NMUR1   | FHIT     | MRGPRX4  |
| KRT5      | NOM1    | FILIP1L  | MRPL23   |
| KRTAP13-3 | NPAS2   | FKBP2    | MRPL24   |
| KRTAP5-6  | NPFF    | FKBP7    | MRPL27   |
| LACE1     | Nprl2   | FLAD1    | MRPS18C  |
| LACTB     | NT5C1A  | FLJ22184 | MRPS36   |
| LAGE3     | Ntpcr   | FLT4     | MRPS7    |
| LAMC3     | NTSR2   | FLVCR1   | MS4A12   |
| LARP1B    | NUDT6   | FLYWCH1  | MS4A13   |
| LBP       | NUP37   | FMN2     | Ms4a15   |
| LCAT      | NUP62CL | FMNL1    | MTA2     |
| LCE2B     | NUS1    | FMO5     | MTDH     |
| LCE5A     | NUTM2A  | FNDC3A   | MTERFD3  |
| LCN12     | NXN     | FOXA3    | MTFR1    |
| LCN2      | NXPE2   | FOXF2    | MTHFR    |
| LCP2      | OBSCN   | FOXK1    | MTIF2    |
| LDB1      | ODF3L1  | FOXN2    | MTMR6    |
| LDHA      | OGG1    | FOXO6    | MTMR7    |
| LDLR      | OLFML1  | FOXQ1    | MTRNR2L1 |
| LEMD1     | OPCML   | FPGT     | MTUS2    |
| LETMD1    | OPN1LW  | FPR2     | MUC5AC   |
| LGALS1    | OPTC    | FRAT1    | MUC5B    |
| LGI1      | OR10Z1  | FRK      | MVP      |



|              |             |         |        |
|--------------|-------------|---------|--------|
| LGI2         | OR11H12     | FRMD3   | MYEOV  |
| LGSN         | OR11H4      | FRZB    | MYL3   |
| LIF          | OR11L1      | FSCB    | MYO18B |
| LILRA2       | OR12D3      | FSTL3   | MYO1F  |
| LILRB5       | OR13C3      | FUOM    | MYO3A  |
| LIMA1        | OR13D1      | FUS     | MYO7B  |
| LIN28B       | OR13G1      | FUT6    | MYOF   |
| LIN7A        | OR1J2       | FUT7    | MYOM3  |
| LINC00684    | OR1L6       | FYB     | MYOZ1  |
| LIPI         | OR2F2       | G0S2    | MYOZ3  |
| LIPT2        | OR2L8       | G3BP2   | MYT1   |
| LITAF        | OR2Z1       | GAB1    | NAA35  |
| Llph         | OR4B1       | GAB3    | NAA60  |
| LOC100129083 | OR4C6       | GABRP   | NAAA   |
| LOC100130357 | OR4D11      | GAGE12J | NAB1   |
| LOC100133128 | OR4E2       | GAGE2E  | NAPG   |
| LOC100144595 | OR4F6       | GAGE7   | NARFL  |
| LOC100288966 | OR4M2       | GAL3ST2 | NAV3   |
| LOC100294033 | OR52N2      | GALNT11 | NBPF6  |
| LOC100294341 | OR56B4      | GALNT16 | NCF1   |
| LOC100505549 | OR5K4       | GALNT18 | NCS1   |
| LOC100996707 | OR6B2       | GALNT2  | NCSTN  |
| LOC100996713 | OR6C70      | GALP    | NDOR1  |
| LOC100996758 | OR6C74      | GANAB   | NDRG4  |
| LOC101059915 | OR7C2       | GAS2L1  | NDUFS5 |
| LOC101060341 | OR8K3       | GAS6    | NEFL   |
| LOC101060521 | OR9A4       | GATA6   | NEU2   |
| LOC101060604 | OSER1       | GBP2    | NFYA   |
| LOC101927375 | OTP         | GCM2    | NGB    |
| LOC101927562 | OTUD6B      | GCNT1   | NHS    |
| LOC101927859 | PADI1       | GCNT3   | NIPBL  |
| LOC101927989 | PAK1IP1     | GCSH    | NKAPL  |
| LOC101928058 | PALM        | GDAP1   | NKG7   |
| LOC101928268 | PALM2-AKAP2 | GDE1    | NOG    |
| LOC101928291 | PALMD       | GDF5    | NOTCH1 |

|              |          |          |         |
|--------------|----------|----------|---------|
| LOC101928380 | PAM      | GEMIN7   | NOTCH2  |
| LOC101928764 | PAN2     | Gen1     | NPC1    |
| LOC101929065 | PAOX     | GGT2     | NR5A2   |
| LOC101929070 | PAQR6    | GHSR     | NRD1    |
| LOC101929072 | PARP10   | GIMD1    | NSUN7   |
| LOC101929264 | PARP16   | GJA8     | NT5C1A  |
| LOC101929578 | PARP6    | GJB1     | NT5DC4  |
| LOC101929702 | PBK      | GKN2     | NTSR2   |
| LOC101929725 | PCDH1    | GLA      | NUDT1   |
| LOC101929748 | PCDH19   | GLIPR1L1 | NUDT7   |
| LOC101929936 | PCDHA1   | GLIS2    | NUP210  |
| LOC101930318 | PCDHGA1  | GLP2R    | NXN     |
| LOC101930355 | PCDHGA11 | GLT1D1   | OAZ2    |
| LOC101930512 | PCDHGB4  | GLTSCR1L | ODF3L1  |
| LOC101930546 | PCDHGC4  | GLUD2    | OFD1    |
| LOC101930637 | PCGF2    | GLYCTK   | OGFRL1  |
| LOC389831    | PCTP     | GMEB2    | OGN     |
| LOC441239    | PDCD1    | GMIP     | OLA1    |
| LOC646862    | PDE1A    | GNA11    | OLFM4   |
| LPL          | PDE4A    | GNA12    | OLFML1  |
| LRFN1        | PDHA1    | GNAI1    | OPN1SW  |
| LRP10        | PDP1     | GNB4     | OR10AD1 |
| LRP4         | PDXDC1   | GNGT2    | OR10G3  |
| LRRC39       | PEX11G   | GNL1     | OR10G4  |
| LRRC4        | PHF2     | GOLGA2   | OR11A1  |
| LRRC48       | PHIP     | GOLGA4   | OR12D3  |
| LRRC58       | PHKA1    | GOLGA6L1 | OR14I1  |
| LRRC8D       | PHKG1    | GOLGA6L3 | OR1F1   |
| LRRC8E       | PIP5KL1  | GOLGA6L9 | OR2D2   |
| LRRN2        | PITPNB   | GOLGA8M  | OR2F2   |
| LSG1         | PJA1     | GON4L    | OR2T1   |
| LSM5         | PKD1     | GOT1L1   | OR2T8   |
| LST1         | PKD1L2   | GPA33    | OR4K2   |
| LTBP2        | PKHD1    | GPATCH11 | OR4L1   |
| LTK          | PKN1     | GPATCH2L | OR4M2   |

|        |          |         |          |
|--------|----------|---------|----------|
| LY6E   | PLA2G4E  | GPBP1   | OR4N4    |
| LYG1   | PLCB2    | Gpn1    | OR4P4    |
| LYVE1  | PLCB4    | GPR116  | OR5AS1   |
| LYZ    | PLEKHA4  | GPR133  | OR5AU1   |
| LZTS1  | PLEKHF2  | GPR137C | OR5K1    |
| MACC1  | PLIN1    | GPR149  | OR5M9    |
| MACF1  | PLK2     | GPR156  | OR6C6    |
| MAFG   | PML      | GPR158  | OR6M1    |
| MAGEA1 | PMM2     | GPR162  | OR8B2    |
| MAGEB1 | PNLDC1   | GPR88   | OR8D1    |
| MAGEC3 | PNMA1    | GPRASP1 | OS9      |
| MAL2   | PNOC     | GPSM3   | OSBP     |
| MAMDC2 | PNPLA5   | GRAMD2  | OSGEPL1  |
| MAMDC4 | POC5     | GRB7    | OSM      |
| MANEA  | POFUT1   | GRIA4   | OSTM1    |
| MANSC1 | POLR2K   | GRM2    | OTOF     |
| MAP1B  | POM121L2 | GRN     | OTOP2    |
| MAP4K3 | PPFIA2   | GRXCR1  | OVCA2    |
| MAP7   | PIIAL4D  | GRXCR2  | P2RY8    |
| MAPK15 | PPM1J    | GSDMA   | P4HA1    |
| MAPK3  | PPP1R14D | GSG1    | PA2G4    |
| MAS1   | PPP1R16B | GSG1L   | PADI1    |
| MBD3   | PPP2R2A  | GSG2    | PAFAH1B2 |
| MBLAC2 | PPP2R5D  | GSTO1   | PALM     |
| MBOAT4 | PPRC1    | GTF2E1  | PAOX     |
| MCEE   | PQBP1    | GTF2H3  | PAPL     |
| MCM2   | PRAME    | GTF2H4  | PAPPA2   |
| MCM5   | PRC1     | GTF3A   | PARL     |
| MCMBP  | PRDM15   | GUCD1   | PATE2    |
| MCOLN2 | PREPL    | GUCY2D  | PATL1    |
| MDK    | PRIMA1   | GYPC    | PAX7     |
| MECOM  | PRNP     | GYS1    | PCBP3    |
| MEGF10 | PRODH    | H1FNT   | PCBP4    |
| METRNL | PRR15    | H1FX    | PCDH1    |
| MFAP2  | PRSS21   | HADHA   | PCDHA3   |

|           |          |           |         |
|-----------|----------|-----------|---------|
| MFI2      | PRSS45   | HADHB     | PCDHB11 |
| MICA      | Prss53   | HAO2      | PCDHB12 |
| MIEN1     | PRSS56   | HAUS6     | PCDHGC4 |
| MILR1     | PSAP     | HBD       | PCSK7   |
| MINK1     | PSAPL1   | HBEGF     | PCTP    |
| MIR205HG  | PSMA5    | Hbq1      | PCYOX1  |
| MLLT1     | PTDSS1   | HEATR4    | PDCD2L  |
| MME       | PTGES3   | HECTD3    | PDCD4   |
| MMRN2     | PTGES3L  | HELZ2     | PDE6H   |
| MNDA      | PTGIS    | HEMGN     | PDHX    |
| MOGAT2    | PTGR2    | HES4      | PDK4    |
| MPO       | PTP4A1   | HES5      | PDP2    |
| MROH5     | PTP4A2   | HGD       | PDSS1   |
| MRPL39    | Ptpmt1   | HGFAC     | PDXDC1  |
| MRPS26    | PTPN12   | HHLA3     | PDZD3   |
| MRPS30    | PTPN18   | HIF1AN    | PET117  |
| MRPS36    | PTPRZ1   | HIF3A     | PGK1    |
| MRPS6     | PTRH2    | HIGD1B    | PGK2    |
| Ms4a15    | PTRHD1   | HIP1R     | PGM2    |
| MS4A5     | PVRL2    | HIST1H2AG | PGP     |
| MS4A6E    | PXK      | HIST1H2BK | PHF14   |
| MSANTD1   | RAB23    | HIVEP2    | PHF21A  |
| MSH6      | RAB3GAP2 | HK2       | PHKA1   |
| MTCP1     | RAB3IL1  | HKDC1     | PHOX2A  |
| MTERFD1   | RABGGTB  | HMGCL     | PHYHIP  |
| MTERFD2   | RAD51    | HMGN4     | PIANP   |
| MTG2      | RAD54L   | HN1L      | PIGW    |
| MTHFD2L   | RAD54L2  | HNF1B     | PIK3C2A |
| MTNR1B    | RAET1E   | HNF4G     | PITPNA  |
| MTR       | RALGPS1  | HNRNPA3   | PKN1    |
| MTRF1L    | RANBP1   | HNRNPCP5  | Plac9   |
| MTRNR2L10 | RANBP17  | HOXA1     | PLAGL1  |
| MTUS1     | RANBP6   | HOXA13    | PLCG2   |
| MUTYH     | RAP2B    | HOXB4     | PLEKHA1 |
| MX1       | RAPSN    | HOXC5     | PLEKHA4 |

|          |          |         |          |
|----------|----------|---------|----------|
| MXRA8    | RARA     | HOXC6   | PLEKHF1  |
| MYBL1    | RASGRP3  | HOXD9   | PLEKHO1  |
| MYH10    | RAVER1   | HPSE2   | PLEKHS1  |
| MYH3     | RBM45    | Hrct1   | PLOD2    |
| MYH9     | RBMY1J   | HRH2    | PLS3     |
| MYL6     | RBP1     | HRNR    | PLXNA2   |
| MYL7     | REEP4    | HS2ST1  | PML      |
| MYLPF    | REM1     | HSD11B1 | PMP2     |
| MYO1B    | RERE     | HSF2BP  | PNLIPRP3 |
| MYT1     | RESP18   | HSPA1B  | POLD3    |
| NAA11    | REST     | HSPBP1  | POLD4    |
| NAA38    | RFPL4AL1 | HTR2A   | POLR2F   |
| NADK2    | RFT1     | HUS1    | POLR2J2  |
| NAGS     | RGS21    | HVCN1   | POU2F3   |
| NAP1L1   | RGS4     | ICAM3   | POU3F2   |
| NAPRT1   | RHOC     | ICAM4   | PPARG    |
| NAT16    | RHPN2    | ICOSLG  | PPL      |
| NAT8B    | RIPK1    | ICT1    | PPP1R14A |
| NBPF14   | RNF123   | IDNK    | PPP1R35  |
| NBPF19   | RNF125   | IDS     | PPT2     |
| NCALD    | RNF180   | IER2    | PRADC1   |
| NCBP2    | RNF219   | IFI27L1 | PRAMEF10 |
| NCCRP1   | RNF26    | IFNA10  | PRAMEF6  |
| NCEH1    | RNF39    | IFNA2   | PRC1     |
| NCR3     | RNF7     | IFNL4   | PRCP     |
| NDFIP2   | RNMTL1   | IFNW1   | PRKAG3   |
| NDST2    | ROBO3    | IFRD1   | PRKD3    |
| NDUFA4L2 | ROM1     | IFT20   | PRMT9    |
| NDUFB11  | ROPN1L   | IGFL1   | PROK1    |
| NDUFB5   | RPUSD1   | IGFN1   | PRPH2    |
| NDUFS3   | RPUSD4   | IGJ     | PRRC1    |
| NDUFV3   | RRAS     | IGSF23  | Prrt4    |
| NECAB2   | RRM2B    | IKZF1   | PRSS57   |
| NECAP2   | RSPH10B  | IL15RA  | Prss58   |
| NEK4     | RSPH10B2 | IL21    | PSAT1    |

|          |           |          |         |
|----------|-----------|----------|---------|
| NEK9     | RSPH4A    | IL2RA    | PSME4   |
| NELFE    | RUNX1T1   | IL32     | PSPH    |
| NEMF     | S100A11   | IL4      | PTBP1   |
| NEU1     | S100A14   | IL5RA    | PTCH1   |
| NFATC2IP | S100A4    | IL6ST    | PTDSS1  |
| NGDN     | S1PR5     | IMPAD1   | PTDSS2  |
| NHLRC4   | SAC3D1    | INADL    | PTGES3  |
| NIN      | SAG       | ING1     | PTGIS   |
| NKAIN2   | SC5D      | ING2     | PTN     |
| NKAIN3   | SCAMP2    | ING3     | PTPLAD1 |
| NKX2-2   | SCAMP5    | INMT     | PTPN13  |
| NLGN3    | SCARA5    | INPP5A   | PTPN22  |
| NLK      | SCFD2     | INPP5J   | PTPRCAP |
| NLRP2    | SCN7A     | INTS1    | PTPRG   |
| NLRP7    | SCO1      | INTS10   | PTPRR   |
| NNAT     | SDC3      | INTS3    | PUM2    |
| NOB1     | SDHC      | INTS9    | PYCR2   |
| NOL7     | SDPR      | INTU     | QPCT    |
| NOMO2    | SEC24A    | IPO5     | QTRT1   |
| NOXA1    | SEC31B    | IPO7     | RAB29   |
| NPAP1    | SECISBP2  | IQCB1    | RAB30   |
| NPAS1    | SELPLG    | IQCF1    |         |
| NPBWR2   | SEN2      | IQGAP3   | RAB34   |
| NPM3     | SEPT8     | IRF2BP2  | RAB9A   |
|          | SEPW1     | IRF2BPL  | RABGEF1 |
| NPPB     | SERPINB10 | ISX      | RAD23A  |
| NPTX1    | SESN2     | ISY1     | RAD50   |
| NPY2R    | SET       | ITGA1    | RARRES2 |
| NR1H4    | SETD7     | ITGA4    | RARS2   |
| NR2C2    | SFN       | ITGA7    | RASAL3  |
| NR5A1    | SFRP5     | ITGA8    | RASD1   |
| NRF1     | SFTA2     | ITGB1BP2 | RASL11A |
| NRG3     | SFTPC     | ITM2B    | RB1CC1  |
| NRIP2    | SFXN3     | ITPR1    | RBM42   |
| NRTN     | SFXN4     | Izumo2   | RBM8A   |

|         |          |          |         |
|---------|----------|----------|---------|
| NRXN2   | SGPP1    | JADE2    | RBP3    |
| NSG1    | SH2B3    | JAM3     | RCE1    |
| NSL1    | SH3BGRL2 | KATNA1   | RCN2    |
| NTF3    | SH3PXD2B | KATNAL1  | REEP5   |
| NUDT12  | SHFM1    | KCMF1    | REL     |
| NUMB    | SHISA4   | KCNA1    | REPIN1  |
| NUP62CL | SHOC2    | KCNA5    | RET     |
| NUPL1   | SHPRH    | KCNAB3   | RGCC    |
| NUSAP1  | SHROOM3  | KCNC3    | RGL2    |
| NVL     | SIDT1    | KCNG3    | RGS17   |
| NWD1    | SIGLEC8  | KCNJ16   | RGS18   |
| NXPH3   | SIK3     | KCNK3    | RGS6    |
| NYNRIN  | SIKE1    | KCNMB3   | RHOBTB3 |
| OAS1    | SIN3A    | KCNMB4   | RHOD    |
| OASL    | SIRT5    | KCNN2    | RHOV    |
| OAT     | SIX6     | KCTD21   | RIC8A   |
| OCM     | SKI      | KCTD5    | RNASE2  |
| ODAM    | SLC10A1  | KDM1B    | RNASE6  |
| OMA1    | SLC10A5  | KDM8     | RNASEK  |
| OR10A3  | SLC12A4  | KHDC1L   | RND1    |
| OR10A6  | SLC12A7  | KHK      | RNF141  |
| OR10H1  | SLC16A4  | KIAA0100 | RNF145  |
| OR10V1  | SLC17A1  | KIAA0754 | RNF150  |
| OR1G1   | SLC22A24 | KIAA0895 | RNF186  |
| OR1Q1   | SLC22A7  | KIAA1045 | RNF213  |
| OR2AG2  | SLC25A40 | KIAA1210 | RNF7    |
| OR2C1   | SLC25A51 | KIAA1244 | RNPEP   |
| OR2F2   | SLC27A3  | KIAA1257 | ROCK2   |
| OR2M3   | SLC29A1  | KIAA1328 | RPA4    |
| OR2W1   | SLC2A12  | KIAA1377 | RPGR    |
| OR4C16  | SLC2A14  | KIAA1429 | RPL8    |
| OR4C6   | SLC2A2   | KIAA1456 | RPP25L  |
| OR4D9   | SLC34A1  | KIAA1841 | RPS4Y2  |
| OR4F15  | SLC35B1  | KIF12    | RRP1    |
| OR4F17  | SLC36A3  | KIF13A   | Rrp7a   |

|        |          |             |          |
|--------|----------|-------------|----------|
| OR4K13 | SLC39A12 | KIF18B      | RSAD1    |
| OR4K14 | SLC39A2  | KIF20B      | RSPH1    |
| OR4K5  | SLC43A2  | KIF26A      | RSP02    |
| OR4M2  | Slc46a2  | KIF27       | RTCB     |
| OR4N2  | SLC4A7   | KIF28P      | RTN4     |
| OR51B5 | SLC6A5   | KIF3B       | RUNDC1   |
| OR52B4 | SLC6A8   | KIF5C       | S100A1   |
| OR52B6 | SLC7A13  | KLC3        | S100Z    |
| OR52K2 | SLC9A5   | KLF1        | S1PR2    |
| OR52L1 | SLC9B1   | KLF6        | S1PR5    |
| OR52W1 | SLIT2    | KLHDC9      | SACM1L   |
| OR5AP2 | SLMAP    | KLHL13      | SAMD10   |
| OR5AS1 | SLPI     | KLHL28      | SCAMP2   |
| OR5B12 | SMAD2    | KLHL36      | SCAP     |
| OR5D18 | SMAD3    | KLHL4       | SCARB2   |
| OR5M1  | SMARCA2  | KLHL42      | SCFD2    |
| OR6C1  | SMARCD1  | KLHL6       | SCRN3    |
| OR6C75 | SMARCD2  | KLK15       | SDF2L1   |
| OR6F1  | SMC3     | KLK7        | SDK1     |
| OR6K2  | SMIM23   | KLRC1       | SEH1L    |
| OR6K3  | SMPDL3A  | KLRC4-KLRK1 | SENP2    |
| OR7A10 | SMTNL1   | KLRF1       | SENP8    |
| OR7A5  | SMYD5    | KLRF2       | SEPT1    |
| OR7G1  | SNAP23   | KPNA3       | SERINC1  |
| OR8G2  | SNAP25   | KPNA6       | SERPINA1 |
| OR9G1  | Snmp25   | KPRP        | SERPINA6 |
| OR9Q2  | SNTG2    | KRBA2       | SERPINE2 |
| ORC5   | SNUPN    | KRT10       | SERPINH1 |
| ORM2   | SOCS1    | KRT27       | SETD9    |
| OSCP1  | SOCS7    | KRT34       | SF3A2    |
| OTOF   | SOS2     | KRT6A       | SGSM1    |
| OXSR1  | SP110    | KRT78       | SH2D1A   |
| P2RY14 | SPATA5   | KRT8        | SH2D6    |
| P4HB   | SPDL1    | KRT84       | SHC4     |
| P4HTM  | SPI1     | KRTAP10-7   | SHKBP1   |



|           |            |           |          |
|-----------|------------|-----------|----------|
| Pabpc1l   | SPINK9     | KRTAP10-8 | SIGIRR   |
| Pabpc1l2b | SPRN       | KRTAP12-2 | Siglec15 |
| PABPC4L   | SPTLC3     | KRTAP12-4 | SKP2     |
| PAFAH2    | SPX        | KRTAP2-3  | SLAMF8   |
| PAGE1     | SRRD       | Krtap21-1 | SLC10A7  |
| PAGE2B    | SRSF8      | Krtdap    | SLC12A3  |
| PAK4      | ST14       | KTI12     | SLC15A4  |
| PALLD     | ST20-MTHFS | LAMA1     | SLC18A3  |
| PALMD     | ST5        | LAMA2     | SLC1A7   |
| PAM       | STARD13    | LAMA5     | SLC22A2  |
| PANX1     | STK17A     | LAMP2     | SLC22A23 |
| PAPL      | STK17B     | LAMP5     | SLC22A6  |
| PAPOLB    | STK38      | LAT       | SLC22A9  |
| PAQR3     | STOML1     | LAT2      | SLC24A3  |
| PARK2     | STX10      | LBX1      | SLC25A2  |
| PARP3     | STXBP6     | LCE2B     | SLC25A22 |
| PARS2     | SUB1       | LCN8      | SLC25A25 |
| PATE1     | SUCLA2     | LCNL1     | SLC25A33 |
| PATE3     | SUDS3      | LCTL      | SLC26A11 |
| Pbrm1     | SUMO4      | LDB1      | SLC2A11  |
| PBX1      | SUSD1      | LDB2      | SLC31A1  |
| PCCB      | SYCE1L     | LDHD      | SLC35A3  |
| PCDH19    | Syce2      | LDOC1L    | SLC35B4  |
| PCDHA13   | Sycp2l     | LEFTY1    | SLC35E2  |
| PCYT1A    | SYK        | LEKR1     | SLC35E2B |
| PDCD4     | SYNJ2      | LETM1     | SLC35F5  |
| PDCD6IP   | SYT14      | LGALS7    | SLC39A13 |
| PDCD7     | SYTL1      | LGALS7B   | SLC4A7   |
| PDE10A    | TAC4       | LHX4      | SLC5A4   |
| PDE1A     | TACC2      | LHX5      | SLC6A5   |
| PDHB      | TAF1L      | LIAS      | SLC6A6   |
| PDLIM2    | TAF9B      | LILRB2    | SLC9B2   |
| PDP1      | TAOK1      | LIMCH1    | SMIM11   |
| PDSS2     | TARSL2     | LIN9      | SMIM4    |
| PDZRN3    | TAS2R16    | LINGO4    | SMIM9    |

|         |          |              |           |
|---------|----------|--------------|-----------|
| PEG10   | TBC1D10C | LIPA         | SMN2      |
| PERP    | Tbck     | LITAF        | SMPDL3A   |
| PEX11B  | TBX19    | Llph         | SMPX      |
| PEX11G  | TCEA3    | LMAN2        | SNAI1     |
| PEX5L   | TCEAL1   | LMAN2L       | SNRPE     |
| PEX7    | TCERG1L  | LMBR1        | SNTB1     |
| PFAS    | TCF12    | LMF2         | SNUPN     |
| PFDN6   | TCN2     | LMOD3        | SNX1      |
| PFKFB1  | TCP11L1  | LMX1B        | SNX25     |
| PGC     | TCP11X1  | LNP1         | SNX4      |
| Phax    | TCTEX1D1 | LNx2         | SOCS2     |
| PHKA1   | Tctex1d2 | LOC100129083 | SOCS5     |
| PHLPP1  | TDGF1    | LOC100129361 | SORCS3    |
| PI15    | TEAD1    | LOC100130357 | SOX18     |
| PI16    | TEDDM1   | LOC100131107 | SOX5      |
| PI3     | TEKT5    | LOC100132731 | SPATA2    |
| PI4K2B  | TENM3    | LOC100506127 | SPATA31A6 |
| PIGC    | TET2     | LOC100506248 | SPATA31A7 |
| PIGT    | TEX26    | LOC100506922 | SPIN2B    |
| PIGW    | TEX28    | LOC100507462 | SPINK5    |
| PIGY    | TGIF2LY  | LOC100652824 | SPON2     |
| PIH1D1  | THBS4    | LOC100996318 | SPRED1    |
| PIK3C2B | THNSL1   | LOC101060399 | SPRY4     |
| PIK3C3  | TIMP3    | LOC101060580 | SPSB2     |
| PIP5K1C | TJP2     | LOC101060581 | SPTBN4    |
| PITPNB  | TLK2     | LOC101927160 | SPTY2D1   |
| PITX1   | TLR2     | LOC101927375 | SRCAP     |
| PIWIL4  | TLR6     | LOC101927594 | SRCIN1    |
| PJA2    | TM2D2    | LOC101927662 | SRI       |
| PKD1L2  | TMC6     | LOC101927789 | SRSF8     |
| PKLR    | TMEM151B | LOC101928006 | SSPN      |
| PKN3    | TMEM165  | LOC101928044 | SST       |
| PKP1    | TMEM170A | LOC101928093 | ST7       |
| PLA2G1B | TMEM177  | LOC101928356 | STAB1     |
| PLA2G2E | TMEM198  | LOC101928548 | STARD7    |

|          |              |              |               |
|----------|--------------|--------------|---------------|
| PLA2G4F  | TMEM206      | LOC101928558 | STAT5A        |
| PLAGL2   | TMEM216      | LOC101928892 | STC1          |
| PLBD1    | Tmem237      | LOC101928991 | STEAP4        |
| PLCB4    | TMEM255A     | LOC101929571 | STH           |
| PLEKHA3  | TMEM30A      | LOC101929578 | STK17B        |
| PLEKHG7  | TMEM51       | LOC101929587 | STK32A        |
| PLEKHH2  | TMEM56       | LOC101929627 | STK33         |
| PLEKHO1  | TMEM67       | LOC101929766 | STK38         |
| PLP1     | TMEM9        | LOC101929792 | STOM          |
| PLXNA1   | TMPRSS11F    | LOC101929805 | STRIP2        |
| PMM1     | TMPRSS2      | LOC101929829 | Stx1b         |
| PMP22    | TMPRSS6      | LOC101929936 | STYK1         |
| PNKP     | TMTC1        | LOC101929983 | SUDS3         |
| PNLIPRP2 | TNFAIP1      | LOC101929989 | SULT4A1       |
| PODXL    | TNFAIP6      | LOC101929991 | SUMO4         |
| POLA2    | TNFRSF11B    | LOC101930098 | SUN2          |
| POLE3    | TNFRSF13C    | LOC101930295 | SUPT20HL2     |
| POLE4    | TNFRSF6B     | LOC101930355 | SUSD5         |
| POLL     | TNFSF9       | LOC101930479 | SVIL          |
| POLR2K   | TNIP1        | LOC199882    | SYBU          |
| POLR3G   | TNKS2        | LOC285500    | SYN3          |
| POMGNT1  | TOM1L2       | LOC388813    | SYNJ2BP-COX16 |
| POP1     | TOMM7        | LOC391322    | TAAR9         |
| POTEA    | TOP1         | LOC441155    | TACSTD2       |
| POU5F2   | TOP2A        | LOC441239    | TAF6L         |
| PPARA    | TOR1B        | LOC642441    | TAGLN3        |
| PPARD    | TP53TG3D     | LOC646730    | TARBP2        |
| PPIL4    | TPI1         | LOC646862    | TARSL2        |
| PPIP5K2  | TPSD1        | LOXL1        | TAX1BP1       |
| PPM1G    | TRAFFD1      | LPA          | TBC1D29       |
| PPM1J    | TRAM1        | LPAR4        | TBX19         |
| PPM1N    | TRIM32       | LPCAT4       | TBX2          |
| PPP1R12A | TRIM39-RPP21 | LPHN1        | Tchh          |
| PPP1R14D | TRIM42       | LPHN3        | TCP1          |
| PPP1R17  | TRIM46       | LPO          | TCTEX1D4      |

|          |         |         |           |
|----------|---------|---------|-----------|
| PPP1R2   | TRIM54  | LPPR2   | TDP2      |
| PPP1R7   | TRIM62  | LPPR3   | TENM2     |
| PPP2R2B  | TRIM67  | LRP11   | TESK1     |
| PPP2R3C  | TRIML1  | LRP2BP  | TEX101    |
| PPP3CB   | TRIO    | LRRC23  | TEX11     |
| PRAME    | TRPC5OS | LRRC24  | TGM4      |
| PRAMEF25 | TRPM2   | LRRC27  | THAP2     |
| PRAP1    | TRPM4   | LRRC38  | THEM5     |
| PRDM15   | TRPT1   | LRRC39  | THSD7A    |
| PRDM8    | TRPV1   | LRRC42  | TIMM10B   |
| PREX1    | TSN     | LRRC57  | TINF2     |
| PRG4     | TSPY3   | LRRC6   | TLK1      |
| PRKCD    | TSR3    | LRRC70  | TMEM114   |
| PRMT9    | TTC17   | LRRC8B  | TMEM144   |
| PROZ     | TTC34   | LRRC8E  | TMEM156   |
| PRPF4    | Ttc39a  | LRRIQ1  | TMEM165   |
| PRR11    | TTC4    | LRRTM2  | TMEM175   |
| PRR32    | Tti2    | LSM1    | TMEM178A  |
| PRRG4    | TTLL11  | LSMEM2  | TMEM183B  |
| PRSS57   | TUBGCP5 | LTBP3   | TMEM184C  |
| PRTN3    | TULP4   | LYPD5   | Tmem185b  |
| PSMD10   | TVP23B  | LYRM9   | TMEM253   |
| PSMD12   | TVP23C  | LYZL1   | TMEM33    |
| PSMD9    | TYMP    | M6PR    | TMEM41B   |
| PSME4    | TYROBP  | MADD    | TMEM45B   |
| PSMG2    | UBA52   | MAG     | TMEM63B   |
| PSMG3    | UBASH3A | MAGEA11 | TMPRSS11F |
| Pstk     | UBE2D2  | MAGEA9  | TMTC2     |
| PTGES3L  | UBL4B   | MAGEB1  | TMUB1     |
| PTPN13   | UBQLN4  | Mageb17 | TNFRSF1B  |
| PTPN20B  | UGT2B17 | Magt1   | TNFRSF21  |
| PTPN22   | ULBP1   | MAK     | TNFSF12   |
| PTPN3    | UNCX    | MAMDC4  | TNPO2     |
| PTRH1    | UPP2    | MAN2A1  | TOM1L1    |
| PVALB    | UQCRC2  | MANSC4  | Tomm20l   |

|           |          |            |                  |
|-----------|----------|------------|------------------|
| PVRL2     | URI1     | MAP1LC3B   | TOP1MT           |
| QRICH2    | USF1     | MAP1LC3BP1 | Tox2             |
| RAB11FIP3 | USP17L15 | MAP2K2     | TPBGL            |
| RAB12     | USP20    | MAP3K11    | TPP1             |
| RAB15     | USP41    | MAP3K6     | TPSG1            |
| RAB26     | UXT      | MAP4K5     | TRAPPC2L         |
| RAB33A    | VAC14    | MAPK1      | TRERF1           |
| RABEP2    | VAMP1    | MAPK15     | TREX1            |
| RABL2A    | VAMP3    | MAPK8IP1   | TRIB1            |
| RAD23A    | VAMP8    | MAPK8IP2   | TRIB3            |
| RAD9A     | VBP1     | MARCKSL1   | TRIM16L          |
| RAG1      | VCAM1    | MARCO      | TRIM39-<br>RPP21 |
| RAP1GDS1  | VCY      | MARK4      | TRIM50           |
| RAPGEF5   | VIPR2    | MAS1       | TRIM63           |
| RASA2     | VN1R2    | MAST3      | TRMT6            |
| RASSF1    | VNN1     | MBD1       | TRUB1            |
| RASSF10   | VPS26A   | MBLAC2     | TSFM             |
| RASSF4    | VPS37B   | MCFD2      | TSN              |
| RBBP5     | VPS4A    | MCM10      | TSPAN2           |
| RBM34     | VRK3     | MCM2       | TSPAN7           |
| RBP4      | VSTM2B   | MCPH1      | TSSC4            |
| RCN2      | VWA2     | MED18      | TSSK2            |
| REG1A     | VWA8     | MED20      | TSTA3            |
| REM2      | WAC      | MEGF11     | TSTD3            |
| REP15     | WDFY1    | MEPCE      | TTBK1            |
| REXO1L1P  | WDR45B   | MET        | TTBK2            |
| RFESD     | WDR53    | METTL17    | TTC13            |
| RFPL2     | WHSC1L1  | METTL21B   | TTC21B           |
| RFPL4AL1  | WISP3    | METTL4     | TTC7B            |
| RGAG1     | WRB      | METTL9     | TUBB2A           |
| RGL2      | WTAP     | MEX3D      | TUFM             |
| RHBDL2    | XPNPEP1  | MFAP4      | TULP2            |
| RHOA      | YBEY     | MFAP5      | TULP4            |
| RHOF      | ZAR1     | MFI2       | TVP23C-<br>CDRT4 |
| RHOV      | ZBTB8B   | MFNG       | U2AF1L4          |

|                |                |         |         |
|----------------|----------------|---------|---------|
| RHPN1          | ZCCHC4         | Mfsd10  | U2AF2   |
| RICTOR         | Zdbf2          | MFSD2B  | UAP1L1  |
| RILPL1         | ZEB2           | MFSD4   | UBE2D2  |
| RIPK2          | ZFP36          | MFSD6   | UBE2QL1 |
| RLTPR          | ZNF131         | MGAT3   | UBE3A   |
| RMND5A         | ZNF148         | MGAT5   | UBR7    |
| RNASE1         | ZNF155         | MIA3    | UGT2B11 |
| RNF133         | ZNF177         | MIB2    | UHMK1   |
| RNF150         | ZNF185         | MICAL1  | ULK2    |
| RNF169         | ZNF200         | MIEF1   | UNC13D  |
| RNF182         | ZNF267         | MIEF2   | UNC79   |
| RNF219         | ZNF273         | MILR1   | UNK     |
| RNF8           | ZNF282         | MIPEP   | UPK1A   |
| RNFT2          | ZNF284         | MISP    | UPK3A   |
| ROBO4          | ZNF302         | MKRN3   | UQCRFS1 |
| ROR2           | ZNF324         | MLIP    | USB1    |
| RORA           | ZNF408         | MLLT4   | USF2    |
| RPL36A-HNRNPH2 | ZNF433         | MLLT6   | USP12   |
| RPL39L         | ZNF488         | MLXIP   | USP18   |
| RPL3L          | ZNF500         | MMP10   | USP22   |
| RPL6           | ZNF518B        | MMP17   | USP3    |
| RPS12          | ZNF606         | MMP28   | USP51   |
| RPUSD1         | ZNF665         | MOGAT3  | USP6    |
| RSRC1          | ZNF688         | MORC2   | USP9Y   |
| RTFDC1         | ZNF705D        | MOXD1   | UTP23   |
| RTKN           | ZNF727P        | MPRIP   | UTRN    |
| RTL1           | ZNF732         | MRGPRD  | VANGL1  |
| RUFY3          | ZNF737         | MRGPRX1 | VCPIP1  |
| RXFP1          | ZNF793         | MRGPRX3 | VDR     |
| RXRA           | ZNF80          | MRGPRX4 | VEGFC   |
| RYR1           | ZNF814         | MROH2A  | VIL1    |
| S100A7         | ZNF816-ZNF321P | MRPL14  | VN1R5   |
| S100B          | ZNF845         | MRPL36  | VNN2    |
| SAA4           | ZNF880         | MRPL4   | VPS26A  |
| SAFB           | ZNF92          | MRPL48  | VPS52   |

|          |         |          |          |
|----------|---------|----------|----------|
| SALL1    | ZNRF2   | MRPL49   | VRK3     |
| SARS2    | ZSCAN12 | MRPL51   | VWA5B2   |
| SBF2     | ZSCAN23 | MRPL53   | WBP2     |
| SBK1     | ZSCAN4  | MRRF     | WBSCR27  |
| SCAF11   | ZWINT   | MS4A1    | WDTC1    |
| SCAMP3   |         | MS4A4A   | WFDC6    |
| SCML1    |         | MS4A6A   | WFIKKN2  |
| SCML2    |         | MS4A7    | WIZ      |
| SCN1B    |         | MSC      | WNT5A    |
| SCRT2    |         | MSH4     | WRN      |
| SDAD1    |         | MSH5     | XCL1     |
| SDC4     |         | MSI2     | XKR3     |
| SDF2     |         | Msl2     | XYLT2    |
| SDHB     |         | Msmg     | YPEL4    |
| SDHC     |         | Mst4     | YWHAG    |
| SEC13    |         | MTA1     | ZBED3    |
| SEPT1    |         | MTAP     | ZBTB14   |
| SEPT8    |         | MTERFD1  | ZBTB2    |
| SEPT14   |         | MTG1     | ZBTB41   |
| SERINC4  |         | MTHFS    | ZBTB42   |
| SERPINA6 |         | MTMR4    | ZBTB8B   |
| SERPINB3 |         | MTNR1B   | Zcchc18  |
| SERPINB5 |         | MTR      | ZCCHC3   |
| SESN2    |         | MTRNR2L3 | ZDHHC1   |
| SETDB2   |         | MTRNR2L5 | ZDHHC5   |
| SFRP1    |         | MTRNR2L6 | ZDHHC9   |
| SGCB     |         | MTURN    | ZFP62    |
| SGCE     |         | MTX2     | ZFYVE20  |
| SGSH     |         | MUC21    | Zglp1    |
| SH2D1B   |         | MUC7     | ZMIZ2    |
| SH3BP2   |         | MUM1L1   | ZMPSTE24 |
| SHANK1   |         | MX1      | ZNF132   |
| SHBG     |         | MXI1     | ZNF208   |
| SHCBP1   |         | MYF6     | ZNF233   |
| SHD      |         | MYH13    | ZNF248   |

|          |
|----------|
| SIK2     |
| SIRT1    |
| SKIV2L2  |
| SLAMF6   |
| SLC10A2  |
| SLC10A4  |
| SLC12A1  |
| SLC13A5  |
| SLC1A3   |
| SLC22A2  |
| Slc22a20 |
| SLC22A24 |
| SLC25A46 |
| SLC25A53 |
| SLC26A5  |
| SLC2A11  |
| SLC30A1  |
| SLC30A9  |
| SLC34A2  |
| SLC35B3  |
| SLC35G3  |
| SLC37A2  |
| SLC37A3  |
| SLC38A10 |
| SLC38A11 |
| SLC38A9  |
| SLC39A8  |
| SLC6A1   |
| SLC7A11  |
| SLC7A14  |
| SLC7A3   |
| SLC8A1   |
| SLC9B1   |
| SLCO5A1  |
| SLTM     |

|          |         |
|----------|---------|
| MYH14    | ZNF263  |
| MYL3     | ZNF280B |
| MYO5B    | ZNF324B |
| MYO5C    | ZNF444  |
| MYO7B    | ZNF501  |
| MYO9B    | ZNF513  |
| MYOD1    | ZNF517  |
| MYOM3    | ZNF521  |
| MYT1     | ZNF576  |
| MYZAP    | ZNF578  |
| NAA25    | ZNF579  |
| NAA60    | ZNF582  |
| NACC2    | ZNF589  |
| NAGPA    | ZNF600  |
| NALCN    | ZNF623  |
| NAMPT    | ZNF684  |
| NANOG    | ZNF710  |
| NANS     | ZNF718  |
| NAPEPLD  | ZNF747  |
| NAT1     | ZNF791  |
| NAT2     | ZNF8    |
| NAV3     | ZNF891  |
| NBPF3    | ZNRD1   |
| NCAM2    | ZP1     |
| NCF1     | ZP2     |
| NCKAP1L  | ZPBP2   |
| NCKAP5   | ZSCAN2  |
| NCSTN    |         |
| NDST4    |         |
| NDUFA10  |         |
| NDUFA4L2 |         |
| NDUFA7   |         |
| NDUFA9   |         |
| NDUFAF3  |         |
| NDUFAF6  |         |



|           |
|-----------|
| SMAD1     |
| SMARCD2   |
| SMARCD3   |
| SMC2      |
| SMCO4     |
| SMG9      |
| SMIM13    |
| SMIM15    |
| SMPX      |
| SNAI1     |
| SNAP23    |
| SND1      |
| SNED1     |
| Snrrp70   |
| SNX1      |
| SNX14     |
| SNX8      |
| SOX13     |
| SOX30     |
| SOX8      |
| SP2       |
| SPACA4    |
| SPAG17    |
| SPARCL1   |
| SPATA22   |
| SPATA31D1 |
| SPATA33   |
| SPATS2L   |
| SPCS3     |
| SPDL1     |
| SPERT     |
| SPIB      |
| SPIN1     |
| SPINK7    |
| Spns1     |

|           |
|-----------|
| NDUFB3    |
| NDUFS3    |
| NDUFV1    |
| NEUROD4   |
| NEUROD6   |
| NFKB2     |
| NFU1      |
| NHP2L1    |
| NIPAL4    |
| NIPSNAP3A |
| NKG7      |
| NKIRAS2   |
| NKX2-4    |
| NLGN4X    |
| NLRP11    |
| NME2      |
| NMRK2     |
| NMS       |
| NOL10     |
| NOL11     |
| NOL9      |
| NOMO1     |
| NOP10     |
| NOS1      |
| NOTO      |
| NPHP1     |
| NPL       |
| NPM3      |
| NPR1      |
| NPY4R     |
| NPY5R     |
| NR5A2     |
| NRDE2     |
| NRP1      |
| NRSN2     |

|         |
|---------|
| SPOCD1  |
| SPTBN1  |
| SPTSSA  |
| SQLE    |
| SRCIN1  |
| SRP68   |
| SRP72   |
| SRPK3   |
| SRRD    |
| SRRM4   |
| SRSF8   |
| SSBP2   |
| SSMEM1  |
| STARD6  |
| STAT5B  |
| STK17B  |
| STK19   |
| STPG1   |
| STRADA  |
| STRIP2  |
| STX1A   |
| STXBP6  |
| SUDS3   |
| SUGCT   |
| SULT1E1 |
| SUN2    |
| SUN3    |
| SUOX    |
| SYCE1   |
| SYN1    |
| SYNPR   |
| SYPL1   |
| SYS1    |
| SYT12   |
| SYT13   |

|         |
|---------|
| NSRP1   |
| NSUN7   |
| NT5C1A  |
| NT5C1B  |
| NT5M    |
| NTF4    |
| NTNG2   |
| NUCB2   |
| NUMA1   |
| NUP133  |
| NUP210  |
| NUSAP1  |
| NXF1    |
| NXNL1   |
| NXPH2   |
| NXT2    |
| OAZ1    |
| OCA2    |
| OCM     |
| OCSTAMP |
| OFCC1   |
| OLFML2A |
| OLIG3   |
| OPLAH   |
| OPN3    |
| OPTN    |
| OR11G2  |
| OR11H4  |
| OR13C8  |
| OR13G1  |
| OR13H1  |
| OR1N1   |
| OR2A1   |
| OR2A5   |
| OR2F2   |

|         |
|---------|
| SYTL2   |
| TAAR9   |
| TAB2    |
| TAC1    |
| Tarm1   |
| TAS2R13 |
| TAS2R60 |
| TBC1D26 |
| TBC1D4  |
| TBCE    |
| TBPL2   |
| TEP1    |
| TEX30   |
| TFDP3   |
| TFE3    |
| TFEC    |
| TGM3    |
| THAP3   |
| THBS2   |
| THEMIS  |
| TIMM17B |
| TIMM44  |
| TIMM9   |
| TLR5    |
| TLR6    |
| TLX2    |
| TLX3    |
| TM7SF2  |
| TMCO2   |
| TMCO4   |
| Tmco5a  |
| TMED10  |
| TMED3   |
| TMED7   |
| TMEM147 |

|        |
|--------|
| OR2M4  |
| OR2M7  |
| OR2T29 |
| OR2Z1  |
| OR4A15 |
| OR4C16 |
| OR4E2  |
| OR4F17 |
| OR4K5  |
| OR4S2  |
| OR51A7 |
| OR51B6 |
| OR51I1 |
| OR51M1 |
| OR52H1 |
| OR52K2 |
| OR52N2 |
| OR56A5 |
| OR5AN1 |
| OR5AS1 |
| OR5B12 |
| OR5M3  |
| OR5M9  |
| OR6C74 |
| OR6M1  |
| OR7D4  |
| OR8D1  |
| OR8G2  |
| OR8J3  |
| ORAI1  |
| ORAI3  |
| ORMDL1 |
| OSBPL7 |
| OTOP2  |
| OTUB1  |

|                 |
|-----------------|
| TMEM150B        |
| TMEM165         |
| TMEM17          |
| TMEM173         |
| TMEM191B        |
| TMEM240         |
| TMEM241         |
| TMEM243         |
| TMEM63C         |
| TMEM91          |
| TMEM98          |
| TMOD2           |
| TMPRSS12        |
| TMTC3           |
| TMX4            |
| TNFAIP8L2-SCNM1 |
| TNFRSF13C       |
| TNK1            |
| TOMM6           |
| TOR3A           |
| TP53BP2         |
| TP53I11         |
| TP53TG3D        |
| TP73            |
| TPD52           |
| TPD52L3         |
| TPRKB           |
| TRABD2B         |
| TRADD           |
| TRAF3IP2        |
| TRAF6           |
| Trappc10        |
| TRAPPC9         |
| TRHDE           |
| TRIB1           |

|         |
|---------|
| OTUB2   |
| OTUD5   |
| OTUD6B  |
| OTX2    |
| OXSRI   |
| OXT     |
| P2RX4   |
| P2RX7   |
| P2RY8   |
| P4HTM   |
| PABPC4  |
| PABPN1  |
| PACSLN2 |
| PAGE2B  |
| PAGE4   |
| PAN2    |
| PAQR6   |
| PARD3   |
| PARD3B  |
| PARD6B  |
| PARL    |
| PARVA   |
| PASK    |
| PATE1   |
| PATE3   |
| PBK     |
| PBX2    |
| PBXIP1  |
| PCBD2   |
| PCBP2   |
| PCDH11Y |
| PCDH12  |
| PCDH18  |
| PCDH19  |
| PCDH9   |

|         |
|---------|
| TRIM10  |
| TRIM28  |
| TRIM32  |
| TRIM34  |
| TRIM38  |
| TRIM45  |
| TRIM54  |
| TRIM60  |
| TRIQQ   |
| TROAP   |
| TRPM2   |
| TRPS1   |
| TRUB2   |
| TSEN34  |
| TSFM    |
| TSHZ3   |
| TSPAN2  |
| TSPAN5  |
| TSTA3   |
| TTC18   |
| TTC7A   |
| Tti2    |
| TULP4   |
| TWF1    |
| TWF2    |
| TXNDC15 |
| TYW1    |
| Ubash3b |
| UBE2N   |
| UBE2R2  |
| UBE2V2  |
| UBE3C   |
| UBQLN2  |
| UBQLNL  |
| UBTFL1  |

|          |
|----------|
| PCDHA6   |
| PCDHB14  |
| PCDHGA10 |
| PCDHGB1  |
| PCDHGB3  |
| PCDHGB5  |
| PCIF1    |
| PCSK1    |
| PCSK5    |
| PDCD1    |
| PDCD4    |
| PDCL2    |
| PDDC1    |
| PDE1B    |
| PDE1C    |
| PDE9A    |
| PDIA5    |
| PDXP     |
| PDZD3    |
| PDZD4    |
| PDZD8    |
| PECR     |
| PENK     |
| PER1     |
| PET117   |
| PEX3     |
| PFKFB2   |
| PGAM5    |
| PGBD3    |
| PHKG2    |
| PHLDA3   |
| PHYHIP   |
| PI16     |
| PIGR     |
| PIGW     |

|         |
|---------|
| UCHL5   |
| UNC119  |
| UPRT    |
| UQCC2   |
| UQCRC1  |
| UQCRQ   |
| USF2    |
| USP1    |
| USP37   |
| USP51   |
| VAMP8   |
| VGf     |
| VIMP    |
| VPREB1  |
| VPS11   |
| VPS37C  |
| VPS39   |
| VPS41   |
| VPS4B   |
| VPS51   |
| VPS72   |
| VSTM2B  |
| VSTM2L  |
| VWA5B1  |
| WAS     |
| WBP11   |
| WBP2    |
| WBP4    |
| WBSCR28 |
| WDR17   |
| Wdr38   |
| WDR55   |
| WDR62   |
| WDR64   |
| WDR72   |

|          |
|----------|
| PIK3C2A  |
| PIK3CA   |
| PIK3IP1  |
| PIK3R4   |
| PIK3R5   |
| PILRB    |
| PINX1    |
| PIPOX    |
| PITPNB   |
| PITPNM3  |
| PIWIL1   |
| PKD1L3   |
| PKDCC    |
| PKIA     |
| PLAC1    |
| PLB1     |
| PLCL2    |
| PLD6     |
| PLEKHG4B |
| PLEKHJ1  |
| PLIN4    |
| PLK3     |
| PLS1     |
| PLVAP    |
| PLXNA2   |
| PNLIPRP2 |
| PNMA1    |
| PNMAL1   |
| POLD3    |
| POLN     |
| POLR2C   |
| POLR2J2  |
| POLR3F   |
| POLR3G   |
| POLR3GL  |

|          |
|----------|
| WDR78    |
| WDR96    |
| WFDC8    |
| WFIKKN2  |
| WNT10B   |
| XRCC4    |
| YBX3     |
| ZBED3    |
| ZBTB20   |
| ZBTB46   |
| ZBTB7A   |
| ZC3H3    |
| ZCCHC10  |
| ZDHHC15  |
| ZDHHC2   |
| ZDHHC3   |
| ZFYVE20  |
| ZGRF1    |
| ZMAT2    |
| ZMIZ2    |
| ZMPSTE24 |
| ZMYM2    |
| ZNF132   |
| ZNF19    |
| ZNF20    |
| ZNF202   |
| ZNF215   |
| ZNF230   |
| ZNF233   |
| ZNF263   |
| ZNF300   |
| ZNF311   |
| ZNF418   |
| ZNF436   |
| ZNF445   |

|          |
|----------|
| POMC     |
| POMZP3   |
| PON1     |
| PON3     |
| POP5     |
| POTEC    |
| POTEI    |
| PPARGC1B |
| PPFIA3   |
| PPIAL4C  |
| PPL      |
| PPM1G    |
| PPM1H    |
| PPM1M    |
| PPP1CB   |
| PPP1R35  |
| PPP1R9B  |
| PPP2R5A  |
| PPP3CA   |
| PPP3R2   |
| PPP4R1   |
| PPP4R2   |
| PPP6R1   |
| Ppp6r2   |
| PRAME    |
| PRAMEF19 |
| PRAMEF5  |
| PRAMEF6  |
| PRAMEF7  |
| PRDM13   |
| PRDM15   |
| PRDM4    |
| PRDM5    |
| PRDM7    |
| PRDX4    |

|         |
|---------|
| ZNF468  |
| ZNF517  |
| ZNF550  |
| ZNF551  |
| ZNF554  |
| ZNF555  |
| ZNF565  |
| ZNF569  |
| ZNF572  |
| ZNF583  |
| ZNF585B |
| ZNF606  |
| ZNF607  |
| ZNF615  |
| ZNF658  |
| ZNF665  |
| ZNF682  |
| ZNF701  |
| ZNF727P |
| ZNF740  |
| ZNF747  |
| ZNF786  |
| ZNF8    |
| ZSCAN16 |
| ZSCAN31 |
| ZSCAN32 |
| ZYX     |
|         |

|         |
|---------|
| PRIMPOL |
| PRKAG2  |
| PRKCD   |
| PRKCI   |
| PRKD3   |
| PRKG2   |
| PRKX    |
| PRMT8   |
| PRNP    |
| PROK2   |
| PROM2   |
| PROSC   |
| PRPF38B |
| PRPH    |
| PRPSAP2 |
| PRR14L  |
| PRR22   |
| PRRC2C  |
| PRRT3   |
| PRSS46  |
| PRSS50  |
| PSD2    |
| PSD3    |
| PSD4    |
| PSMA1   |
| PSMB11  |
| PSMC1   |
| PSMC3   |
| PSMF1   |
| PTBP3   |
| PTCH1   |
| PTGDR2  |
| PTGDS   |
| PTK7    |
| PTP4A1  |



|          |
|----------|
| Ptpmt1   |
| PTPN14   |
| PTPN18   |
| PTPRH    |
| PTPRK    |
| PTPRN    |
| PTRH2    |
| PTTG1IP  |
| PTTG2    |
| PUM2     |
| PUS10    |
| PUSL1    |
| PVR      |
| PYROXD2  |
| QRFPR    |
| R3HDM2   |
| RAB17    |
| RAB20    |
| RAB21    |
| RAB33A   |
| RAB39B   |
| RAB3B    |
| RAB9A    |
| RAC1     |
| RAC2     |
| RAD23B   |
| RAD54L   |
| RANBP2   |
| RANBP6   |
| RANBP9   |
| RAPGEF5  |
| RASA1    |
| RASAL3   |
| RASGEF1A |
| RASGRP1  |

|         |
|---------|
| RASL10A |
| RASSF4  |
| RBKS    |
| RBL1    |
| RBM43   |
| RBM44   |
| RBM6    |
| RBMY1J  |
| RBP3    |
| RBP4    |
| RBPMS   |
| RCBTB1  |
| RCCD1   |
| RCN2    |
| RCN3    |
| REEP3   |
| REG3G   |
| RELN    |
| REPS2   |
| RER1    |
| RERGL   |
| RETNLB  |
| REV3L   |
| RFPL4B  |
| RFT1    |
| RFTN1   |
| RFX5    |
| RFXANK  |
| RGMB    |
| RGPD2   |
| RGS12   |
| RGS13   |
| RGS5    |
| RHOB    |
| RHOH    |

|         |
|---------|
| RIC3    |
| RILPL2  |
| RIPK2   |
| Ripply1 |
| RLN1    |
| RLN3    |
| RNASE1  |
| RNASE12 |
| RNASE6  |
| RNASE7  |
| RNASE9  |
| RND2    |
| RNF113A |
| RNF125  |
| RNF133  |
| RNF157  |
| RNF181  |
| RNF212  |
| Rnf217  |
| RNF4    |
| RNFT2   |
| Rnls    |
| ROR1    |
| RPA4    |
| RPL10   |
| RPL10L  |
| Rpl18a  |
| RPL23A  |
| RPL28   |
| RPL9    |
| RPP40   |
| RPS18   |
| RPS4X   |
| RPS6KA1 |
| RPS6KB1 |

|           |
|-----------|
| RPS6KC1   |
| RPTOR     |
| RRH       |
| RRP36     |
| Rrp7a     |
| RSPO3     |
| RSRC1     |
| RTFDC1    |
| RTN4RL1   |
| RUNX3     |
| RUSC1     |
| RYBP      |
| S100A10   |
| S100A12   |
| S100A2    |
| S100A7    |
| S100A7A   |
| S100PBP   |
| SAA2-SAA4 |
| SAFB2     |
| SAMD11    |
| SAMD12    |
| SAMSN1    |
| SAPCD2    |
| SAR1B     |
| SASS6     |
| SBF2      |
| SBK3      |
| SCAF8     |
| SCAI      |
| SCARA3    |
| SCD5      |
| SCGB3A2   |
| SCGN      |
| SCN2A     |

|           |
|-----------|
| SCN3B     |
| SCNN1D    |
| SCOC      |
| SCRT1     |
| SCUBE2    |
| SDR16C5   |
| Sec16a    |
| SEC61A2   |
| SEH1L     |
| SELPLG    |
| SEMA3G    |
| SEMA4F    |
| SEMA4G    |
| SEMA5A    |
| SEMA7A    |
| SEMG2     |
| SENP8     |
| SEPT1     |
| SEPT8     |
| SEPW1     |
| SERBP1    |
| SERHL2    |
| SERPINA6  |
| SERPINB11 |
| SERPINB13 |
| SERPINB2  |
| SERPINE3  |
| SESN2     |
| SETD6     |
| SETD8     |
| SEZ6L     |
| SEZ6L2    |
| SFI1      |
| SFT2D1    |
| SFTPC     |

|          |
|----------|
| SFTPD    |
| SFXN2    |
| SGK2     |
| SGSM1    |
| SH2D4A   |
| SH2D7    |
| SH3GL3   |
| SH3KBP1  |
| SH3PXD2B |
| SH3RF3   |
| SH3YL1   |
| SHANK3   |
| SHMT2    |
| SHOX     |
| Siglec15 |
| SIN3B    |
| SIPA1L3  |
| SIRT7    |
| SIT1     |
| SKI      |
| SLAMF6   |
| SLC10A5  |
| SLC11A1  |
| SLC12A4  |
| SLC13A5  |
| SLC17A6  |
| SLC17A8  |
| SLC18A2  |
| SLC19A2  |
| SLC1A1   |
| SLC1A5   |
| SLC22A2  |
| SLC22A6  |
| SLC23A3  |
| SLC25A11 |

|          |
|----------|
| SLC25A12 |
| SLC25A16 |
| SLC25A22 |
| SLC25A23 |
| SLC25A24 |
| SLC25A26 |
| SLC25A28 |
| SLC25A46 |
| SLC25A47 |
| SLC27A6  |
| SLC28A1  |
| SLC29A3  |
| SLC2A13  |
| SLC2A14  |
| SLC2A3   |
| SLC30A1  |
| SLC30A8  |
| SLC32A1  |
| SLC33A1  |
| SLC35A2  |
| SLC35D1  |
| SLC35D3  |
| SLC35G1  |
| SLC35G3  |
| SLC35G6  |
| SLC36A2  |
| SLC37A2  |
| SLC38A5  |
| SLC38A8  |
| SLC39A12 |
| SLC39A8  |
| SLC44A1  |
| SLC44A4  |
| SLC45A2  |
| SLC46A1  |

|          |
|----------|
| SLC4A1   |
| SLC4A9   |
| SLC5A4   |
| SLC7A13  |
| SLC7A6   |
| SLC9A4   |
| SLCO1A2  |
| SLCO1B1  |
| SLCO1B7  |
| SLCO3A1  |
| SLITRK2  |
| SLITRK4  |
| SLMAP    |
| SMAD7    |
| SMARCA5  |
| SMARCAD1 |
| SMARCC1  |
| SMARCD2  |
| SMCO2    |
| SMCO4    |
| SMG1     |
| SMIM14   |
| SMIM15   |
| SMIM3    |
| SMIM7    |
| SMPD1    |
| SMR3A    |
| SMR3B    |
| SMYD2    |
| SNAI3    |
| SNRNP27  |
| SNTG2    |
| SNURF    |
| SOCS7    |
| SORBS2   |



|            |
|------------|
| SOX10      |
| SOX11      |
| SP5        |
| SPAG5      |
| SPAST      |
| SPATA21    |
| SPATA31A6  |
| SPATA8     |
| SPDYE4     |
| Spg11      |
| SPG21      |
| SPIDR      |
| SPINK2     |
| SPINK6     |
| SPRY4      |
| SPSB2      |
| SRGAP2D    |
| SRGAP3     |
| SRPR       |
| Srrm3      |
| SRSF3      |
| SRSF8      |
| SRXN1      |
| SSBP2      |
| SSBP4      |
| SSR2       |
| SSX2       |
| ST6GALNAC1 |
| ST6GALNAC5 |
| ST6GALNAC6 |
| STAG1      |
| STARD10    |
| STARD4     |
| STAT1      |
| STAT4      |

|         |
|---------|
| STAT5A  |
| STEAP3  |
| STK10   |
| STK11   |
| STK17B  |
| STK25   |
| STK36   |
| STK38L  |
| STK4    |
| STMN3   |
| STOML2  |
| STRA13  |
| STX17   |
| STXBP5  |
| SUDS3   |
| SUGP2   |
| SULT1A2 |
| SULT1A3 |
| SULT1C2 |
| SULT2A1 |
| SULT4A1 |
| SUMF1   |
| SUN1    |
| SURF1   |
| SURF6   |
| SVIL    |
| SVIP    |
| SYCP2   |
| SYDE2   |
| SYF2    |
| SYN1    |
| SYNE1   |
| SYNGAP1 |
| SYNJ2   |
| SYT13   |

|          |
|----------|
| SYT2     |
| SYT6     |
| TAAR1    |
| TAAR6    |
| Tab1     |
| TACR2    |
| TAF10    |
| TAF12    |
| TAF7     |
| TAF7L    |
| TAOK2    |
| TARDBP   |
| TARP     |
| TAS2R10  |
| TAS2R46  |
| TBC1D16  |
| TBC1D2   |
| TBC1D21  |
| TBC1D5   |
| TBCB     |
| TBX18    |
| TBX5     |
| TC2N     |
| TCEAL6   |
| TCEANC2  |
| TCEB3    |
| TCF24    |
| TCF7L2   |
| TCN1     |
| TCP11L2  |
| TCTA     |
| Tctex1d2 |
| TDG      |
| TDP2     |
| TDRD1    |

|         |
|---------|
| TDRD5   |
| TEAD2   |
| TEF     |
| TENM3   |
| TERT    |
| TES     |
| TESC    |
| TESK1   |
| TESK2   |
| TFB2M   |
| TFDP3   |
| TFPT    |
| TGDS    |
| TGIF1   |
| TGM3    |
| TGM5    |
| TGM7    |
| TGS1    |
| THAP10  |
| THAP2   |
| THAP7   |
| THBS2   |
| THBS3   |
| THEMIS  |
| THG1L   |
| THOC6   |
| THRAP3  |
| THRSP   |
| THSD7B  |
| TIAF1   |
| TIFA    |
| TIMM17A |
| TIMM9   |
| TINAG   |
| TJP1    |

|                    |
|--------------------|
| TK2                |
| TLE4               |
| TLR5               |
| TLX2               |
| TM2D1              |
| TMC1               |
| TMCO4              |
| TMED9              |
| TMEFF1             |
| TMEM100            |
| TMEM102            |
| TMEM107            |
| TMEM109            |
| TMEM11             |
| TMEM117            |
| TMEM129            |
| TMEM144            |
| TMEM158            |
| TMEM161A           |
| TMEM165            |
| TMEM167A           |
| TMEM183A           |
| TMEM189-<br>UBE2V1 |
| TMEM200C           |
| TMEM210            |
| TMEM211            |
| TMEM214            |
| TMEM216            |
| TMEM229A           |
| TMEM231            |
| Tmem237            |
| TMEM242            |
| TMEM247            |
| TMEM249            |
| TMEM251            |

|           |
|-----------|
| TMEM255A  |
| TMEM38A   |
| TMEM38B   |
| TMEM45B   |
| TMEM52B   |
| TMEM54    |
| TMEM56    |
| TMEM79    |
| TMPRSS11B |
| TMPRSS2   |
| TMPRSS4   |
| TMSB10    |
| TMX3      |
| TNF       |
| TNFAIP1   |
| TNFRSF21  |
| TNFRSF6B  |
| TNFSF11   |
| TNFSF15   |
| TNIK      |
| TNKS2     |
| TNNC1     |
| TNNI2     |
| TNNI3K    |
| TOB1      |
| TOMM7     |
| TOMM70A   |
| TOPORS    |
| TOR1AIP1  |
| TOR3A     |
| TP53I11   |
| TP63      |
| TPPP      |
| TPTE      |
| TRABD2B   |

|          |
|----------|
| TRAPPC12 |
| TRAPPC13 |
| TRDMT1   |
| TRDN     |
| TRIM17   |
| TRIM21   |
| TRIM31   |
| TRIM32   |
| TRIM37   |
| TRIM43B  |
| TRIM49D1 |
| TRIM56   |
| TRIM59   |
| TRIM62   |
| TRIM68   |
| TRIM71   |
| TRIML1   |
| TRIOBP   |
| TRMT13   |
| TRMT2A   |
| TRMT2B   |
| TRMT6    |
| TRPM7    |
| TRPV3    |
| TRPV4    |
| TRUB1    |
| TSC22D3  |
| TSGA10IP |
| TSPAN12  |
| TSPAN17  |
| TSPAN18  |
| TSPAN2   |
| TSPAN31  |
| TSPAN4   |
| TSR2     |

|         |
|---------|
| TSSC4   |
| TTBK2   |
| TTC23   |
| Ttc23l  |
| TTC30A  |
| TTC32   |
| TTLL12  |
| TTLL5   |
| TTR     |
| TUBGCP6 |
| TULP2   |
| TUSC3   |
| TWF2    |
| TXNDC11 |
| TXNDC17 |
| TXNRD1  |
| TXNRD3  |
| TYROBP  |
| TYRP1   |
| UBB     |
| UBE2D3  |
| UBE2E2  |
| UBE2NL  |
| UBE2V2  |
| UBE3B   |
| UBE3C   |
| UBLCP1  |
| UBOX5   |
| UBR7    |
| UBTD1   |
| UGT1A1  |
| UGT1A9  |
| UGT2B10 |
| ULK2    |
| ULK3    |



|         |
|---------|
| UNC13D  |
| UNC5B   |
| UNC5D   |
| UNCX    |
| UPF2    |
| UPF3A   |
| UPK1A   |
| UQCC1   |
| USH1C   |
| USP14   |
| USP25   |
| USP28   |
| USP33   |
| USP40   |
| USP43   |
| USP7    |
| UTP6    |
| UTS2B   |
| UXS1    |
| VAMP7   |
| VAMP8   |
| VAT1    |
| VCL     |
| VCY     |
| VCY1B   |
| VEGFA   |
| VIPAS39 |
| VIPR2   |
| VKORC1  |
| VMO1    |
| VPRBP   |
| VPREB3  |
| VPS36   |
| VPS45   |
| VPS53   |

|         |
|---------|
| VRTN    |
| VTI1B   |
| VWA8    |
| VWF     |
| WASF3   |
| WBSCR16 |
| WBSCR28 |
| WDR31   |
| WDR53   |
| WDR6    |
| WDR72   |
| WDR75   |
| WDR81   |
| WDR87   |
| WDSUB1  |
| Wfdc2   |
| WFIKKN1 |
| WIZ     |
| WNT3A   |
| WRB     |
| WWC2    |
| XCR1    |
| XIRP1   |
| XKR6    |
| XKRX    |
| XPA     |
| XPO5    |
| XRCC2   |
| YIF1A   |
| YIPF5   |
| YKT6    |
| ZAK     |
| ZBED3   |
| ZBTB20  |
| ZBTB32  |

|          |
|----------|
| ZBTB37   |
| ZC3H12C  |
| Zc3h18   |
| ZC3HC1   |
| ZCCHC2   |
| ZCRB1    |
| ZDHHC8   |
| ZFAND1   |
| ZFP14    |
| ZFP36    |
| ZFY      |
| ZFYVE16  |
| ZFYVE19  |
| ZIC5     |
| ZIK1     |
| ZKSCAN2  |
| ZMPSTE24 |
| ZMYND10  |
| ZMYND11  |
| ZMYND15  |
| ZMYND19  |
| ZNF146   |
| ZNF16    |
| ZNF165   |
| ZNF17    |
| ZNF174   |
| ZNF19    |
| ZNF200   |
| ZNF22    |
| ZNF248   |
| ZNF25    |
| ZNF250   |
| ZNF276   |
| ZNF292   |
| ZNF300   |

|         |
|---------|
| ZNF304  |
| ZNF319  |
| ZNF32   |
| ZNF324B |
| ZNF331  |
| ZNF34   |
| ZNF37A  |
| ZNF385A |
| ZNF396  |
| ZNF410  |
| ZNF417  |
| ZNF419  |
| ZNF443  |
| ZNF461  |
| ZNF485  |
| ZNF488  |
| ZNF518A |
| ZNF519  |
| ZNF526  |
| ZNF555  |
| ZNF557  |
| ZNF593  |
| ZNF600  |
| ZNF628  |
| ZNF668  |
| ZNF678  |
| ZNF705A |
| ZNF716  |
| ZNF720  |
| ZNF746  |
| ZNF747  |
| ZNF761  |
| ZNF8    |
| ZNF808  |
| ZNF879  |

|         |
|---------|
| ZNF93   |
| ZP2     |
| ZRANB3  |
| ZSCAN12 |
| ZSCAN16 |
| ZSCAN20 |
| ZSCAN30 |
| ZSCAN9  |
| ZSWIM8  |
| ZXDB    |

Supplementary Table S4: Unique/multiple shRNA hits

| Control hit | # shRNA | HU hit    | # shRNA | DOX hit | # shRNA | HU + DOX hit | # shRNA |
|-------------|---------|-----------|---------|---------|---------|--------------|---------|
| ACTB        | 4       | ACTB      | 3       | CENPE   | 6       | OCM          | 5       |
| FGFR1       | 4       | CTNNB1    | 3       | CIART   | 6       | PFDN4        | 5       |
| H3F3B       | 4       | EEF2      | 3       | H3F3B   | 6       | PPIB         | 5       |
| PLCB4       | 4       | GAGE12J   | 3       | POLR1A  | 6       | ACTB         | 4       |
| ACSM2A      | 3       | GPBP1     | 3       | YEATS4  | 6       | ADAMTSL1     | 4       |
| CCDC121     | 3       | KRTAP10-7 | 3       | AURKA   | 5       | BRSK2        | 4       |
| CDK1        | 3       | Ms4a15    | 3       | FGFR1   | 5       | C5orf49      | 4       |
| CEP250      | 3       | NAA30     | 3       | LAMB1   | 5       | Eif6         | 4       |
| EREG        | 3       | PARP10    | 3       | NIP7    | 5       | GRPEL1       | 4       |
| FOSL1       | 3       | PCDHGA1   | 3       | PFDN4   | 5       | H3F3B        | 4       |
| FYN         | 3       | PFDN4     | 3       | RPL6    | 5       | LOC100293704 | 4       |
| HLA-F       | 3       | PPIB      | 3       | SNRPF   | 5       | POLR1A       | 4       |
| KCNAB3      | 3       | PTGR2     | 3       | TWF2    | 5       | ACY3         | 3       |
| LDLR        | 3       | RABGGTB   | 3       | YAP1    | 5       | ADCK3        | 3       |
| LY6E        | 3       | SLC2A12   | 3       | ACTB    | 4       | AR           | 3       |
| NAA30       | 3       | TBX19     | 3       | BAK1    | 4       | CARD14       | 3       |
| NEMF        | 3       | TTBK1     | 3       | COPB2   | 4       | CCKBR        | 3       |
| NIP7        | 3       | ABCA12    | 2       | CPA3    | 4       | CDK1         | 3       |
| NUP62CL     | 3       | ACVR1B    | 2       | CXCL9   | 4       | CENPE        | 3       |
| OCM         | 3       | ADAM10    | 2       | DENND2C | 4       | CIART        | 3       |
| PAGE2B      | 3       | ADD1      | 2       | DYNC1H1 | 4       | CMTM5        | 3       |
| PHKG1       | 3       | AGAP5     | 2       | Eif6    | 4       | COG4         | 3       |
| PNPLA8      | 3       | AGBL2     | 2       | FAM185A | 4       | COPB2        | 3       |
| PRDM15      | 3       | AIFM2     | 2       | FOXO6   | 4       | DCSTAMP      | 3       |
| RASIP1      | 3       | ANKS1A    | 2       | GAPDH   | 4       | DDX47        | 3       |
| RASSF10     | 3       | ARFIP1    | 2       | GJA8    | 4       | DGKK         | 3       |
| SLX4        | 3       | ARHGAP9   | 2       | HEATR4  | 4       | DTX3         | 3       |
| SRRD        | 3       | ARMC8     | 2       | HEMGN   | 4       | DZANK1       | 3       |
| ST5         | 3       | ARSA      | 2       | ITM2B   | 4       | EIF3H        | 3       |
| VPS72       | 3       | ATF7IP2   | 2       | MLLT6   | 4       | ELL2         | 3       |
| ZBTB20      | 3       | ATP5H     | 2       | NAA30   | 4       | EPX          | 3       |
| ZCCHC10     | 3       | AURKA     | 2       | NIT1    | 4       | Fam154b      | 3       |
| ZNF555      | 3       | AXDND1    | 2       | OCM     | 4       | GPR65        | 3       |
| ZNF565      | 3       | BIRC7     | 2       | OR5AN1  | 4       | GRINA        | 3       |
| ABR         | 2       | BTNL2     | 2       | PLK1    | 4       | HADHB        | 3       |
| ACACB       | 2       | C1orf194  | 2       | POLR2B  | 4       | HIAT1        | 3       |
| ACOXL       | 2       | C1QTNF6   | 2       | PPAN    | 4       | HYPK         | 3       |
| ACVR2B      | 2       | C2ORF16   | 2       | PPIB    | 4       | KAT5         | 3       |
| ADCK1       | 2       | C9orf16   | 2       | PRDM15  | 4       | L3MBTL3      | 3       |
| ADRBK2      | 2       | CA5A      | 2       | RAE1    | 4       | LALBA        | 3       |

|           |   |         |   |          |   |              |   |
|-----------|---|---------|---|----------|---|--------------|---|
| AGA       | 2 | CCDC17  | 2 | SLITRK3  | 4 | LOC101928761 | 3 |
| AIG1      | 2 | CCDC22  | 2 | STRA13   | 4 | LYPD2        | 3 |
| AKAP3     | 2 | CCND2   | 2 | UBB      | 4 | MAGEA9       | 3 |
| ALG14     | 2 | CD276   | 2 | URB1     | 4 | MSANTD3      | 3 |
| Apobr     | 2 | CHAF1A  | 2 | WBSCR28  | 4 | NAA30        | 3 |
| APOC2     | 2 | CHRNA   | 2 | ZNF19    | 4 | NDOR1        | 3 |
| APOL5     | 2 | CLCN6   | 2 | A4GNT    | 3 | NDUFS2       | 3 |
| APOL6     | 2 | CLDND1  | 2 | ABR      | 3 | NIPBL        | 3 |
| AQP4      | 2 | CLEC6A  | 2 | ADAM30   | 3 | OLFM4        | 3 |
| ARHGAP15  | 2 | CNOT7   | 2 | ADAT2    | 3 | PARP6        | 3 |
| ARHGAP44  | 2 | COA1    | 2 | AGO3     | 3 | PCCB         | 3 |
| ARHGAP9   | 2 | COL25A1 | 2 | AKAP3    | 3 | PHOX2A       | 3 |
| ASB11     | 2 | COL4A1  | 2 | APAF1    | 3 | POLB         | 3 |
| ASIC4     | 2 | CORO1B  | 2 | ARHGEF15 | 3 | PRKD3        | 3 |
| ASMTL     | 2 | COX6B1  | 2 | ARMC8    | 3 | PTRH2        | 3 |
| ATE1      | 2 | CPO     | 2 | ATP6V0E1 | 3 | RASGEF1C     | 3 |
| ATP1B4    | 2 | CuI9    | 2 | ATP9A    | 3 | RCE1         | 3 |
| ATPAF1    | 2 | DCTPP1  | 2 | BAIAP3   | 3 | REL          | 3 |
| AURKA     | 2 | DCUN1D1 | 2 | BMP4     | 3 | RGCC         | 3 |
| B9D2      | 2 | DDA1    | 2 | BZW2     | 3 | RMDN2        | 3 |
| Bend3     | 2 | DDX23   | 2 | C11ORF31 | 3 | RPGRIPI1L    | 3 |
| BIN3      | 2 | DFNA5   | 2 | C17orf70 | 3 | SEMA4F       | 3 |
| BMP6      | 2 | DHCR24  | 2 | C10RF27  | 3 | SLC25A25     | 3 |
| BRINP1    | 2 | DLG1    | 2 | C5AR2    | 3 | SLC5A4       | 3 |
| BRINP2    | 2 | DPYSL3  | 2 | C9ORF72  | 3 | SSPN         | 3 |
| C12orf60  | 2 | DRD5    | 2 | CA5B     | 3 | SYNJ2        | 3 |
| C14orf177 | 2 | DUOXA2  | 2 | CAPNS1   | 3 | TMEM259      | 3 |
| C16orf90  | 2 | EBP     | 2 | Carkd    | 3 | TRIM4        | 3 |
| C17orf112 | 2 | EFCAB13 | 2 | CCDC59   | 3 | TTBK1        | 3 |
| C1orf127  | 2 | EGFR    | 2 | CCNY     | 3 | UBB          | 3 |
| C21ORF62  | 2 | EGR4    | 2 | CD164    | 3 | YAP1         | 3 |
| C5orf24   | 2 | EHD1    | 2 | CD248    | 3 | ZNF132       | 3 |
| C9ORF72   | 2 | Eif6    | 2 | CD33     | 3 | ZNF391       | 3 |
| CACNG3    | 2 | ELAVL4  | 2 | CD86     | 3 | ZNF536       | 3 |
| CAGE1     | 2 | ELL2    | 2 | CIAO1    | 3 | MARCH2       | 2 |
| CAMK2D    | 2 | EML3    | 2 | CLEC4F   | 3 | SEPT9        | 2 |
| CARD14    | 2 | ENDOG   | 2 | CMAS     | 3 | AAED1        | 2 |
| CASP7     | 2 | EPN2    | 2 | CNR2     | 3 | ABCB6        | 2 |
| CATSPERB  | 2 | EVA1A   | 2 | CRTAC1   | 3 | ABCF2        | 2 |
| CAV1      | 2 | FABP5   | 2 | CT47B1   | 3 | ABHD12       | 2 |
| CBFB      | 2 | FAM127A | 2 | CTBS     | 3 | Acap3        | 2 |
| CBX6      | 2 | FAM185A | 2 | CTNS     | 3 | ACAT1        | 2 |
| CCDC37    | 2 | FAM83D  | 2 | DBX1     | 3 | ACE          | 2 |

|         |   |          |   |            |   |          |   |
|---------|---|----------|---|------------|---|----------|---|
| CCDC57  | 2 | FBLN7    | 2 | Dcaf8      | 3 | ACN9     | 2 |
| CCDC64  | 2 | FCN1     | 2 | DEFB136    | 3 | ACOT11   | 2 |
| CCK     | 2 | FRRS1L   | 2 | DNAJA2     | 3 | ADAM29   | 2 |
| CCL24   | 2 | FSTL1    | 2 | DNASE1L3   | 3 | ADHFE1   | 2 |
| CCR9    | 2 | GAL3ST1  | 2 | DNASE2B    | 3 | AGXT     | 2 |
| CCRL2   | 2 | GALNT1   | 2 | DOPEY1     | 3 | AGXT2    | 2 |
| CD276   | 2 | GAPT     | 2 | DPF1       | 3 | Akip1    | 2 |
| CDH18   | 2 | GCA      | 2 | DPH1       | 3 | AKR1C1   | 2 |
| CECR2   | 2 | GCSAML   | 2 | DUOX1      | 3 | AKT1S1   | 2 |
| CEP76   | 2 | GNL1     | 2 | ECI2       | 3 | ALDH1A2  | 2 |
| CHD6    | 2 | GP9      | 2 | ELMOD2     | 3 | ALDH4A1  | 2 |
| Chpf2   | 2 | GPR68    | 2 | EMP1       | 3 | ALPL     | 2 |
| CHRNA4  | 2 | GPS2     | 2 | ERAL1      | 3 | AMIGO2   | 2 |
| CLK4    | 2 | GRPEL2   | 2 | EREG       | 3 | ANKFN1   | 2 |
| CLSTN1  | 2 | GRXCR1   | 2 | ERVMER34-1 | 3 | ANKRD13B | 2 |
| CNTNAP4 | 2 | GSPT2    | 2 | Fam154b    | 3 | ANKRD33  | 2 |
| COL28A1 | 2 | GTPBP6   | 2 | FAM168A    | 3 | AP3B1    | 2 |
| COL4A4  | 2 | GTSE1    | 2 | FCHSD2     | 3 | AP5S1    | 2 |
| CPA3    | 2 | H3F3B    | 2 | FGFR3      | 3 | APOL5    | 2 |
| CPE     | 2 | HBS1L    | 2 | FLYWCH1    | 3 | AQP6     | 2 |
| CRCP    | 2 | HELLS    | 2 | FOXQ1      | 3 | ARAP1    | 2 |
| CSPG4   | 2 | HLA-DRB4 | 2 | GLIPR1L1   | 3 | ARHGAP6  | 2 |
| CYB5D2  | 2 | HOMER1   | 2 | GLTSCR1L   | 3 | ARHGEF6  | 2 |
| CYB5R4  | 2 | HPGDS    | 2 | GPA33      | 3 | ARL14    | 2 |
| CYP4F3  | 2 | HSPB8    | 2 | GPAA1      | 3 | Aspg     | 2 |
| DAZ2    | 2 | IKZF4    | 2 | GPR137C    | 3 | ATF1     | 2 |
| DCAF15  | 2 | INF2     | 2 | GRIA4      | 3 | ATF7IP2  | 2 |
| DDX47   | 2 | INPP5A   | 2 | GRXCR1     | 3 | ATM      | 2 |
| DFNA5   | 2 | KANSL1L  | 2 | HIC1       | 3 | ATP10A   | 2 |
| DGKI    | 2 | KCNK16   | 2 | HN1L       | 3 | ATP1B3   | 2 |
| DHX57   | 2 | KCNRG    | 2 | HOXC6      | 3 | ATP5SL   | 2 |
| DIABLO  | 2 | KIAA1377 | 2 | HP         | 3 | ATP6V1B1 | 2 |
| DIRC2   | 2 | KLHDC2   | 2 | HSPA1B     | 3 | AURKA    | 2 |
| DMC1    | 2 | KLHDC7A  | 2 | IAPP       | 3 | AXIN1    | 2 |
| DSC1    | 2 | KLHL13   | 2 | ICAM3      | 3 | BAG5     | 2 |
| DUSP21  | 2 | KLHL6    | 2 | IDNK       | 3 | BCAT2    | 2 |
| DYM     | 2 | KLRK1    | 2 | IGBP1      | 3 | BCL3     | 2 |
| EARS2   | 2 | KRAS     | 2 | IL11RA     | 3 | BCOR     | 2 |
| EBI3    | 2 | KRTAP5-9 | 2 | IL2RA      | 3 | BNC2     | 2 |
| ECI1    | 2 | KRTAP9-1 | 2 | IMPACT     | 3 | BRINP1   | 2 |
| EEF1G   | 2 | LAT2     | 2 | ING5       | 3 | BRINP2   | 2 |
| Eif6    | 2 | LBP      | 2 | IRF2BP2    | 3 | BTBD11   | 2 |
| ENPEP   | 2 | LEMD3    | 2 | ITIH4      | 3 | BZW1     | 2 |



|          |   |            |   |            |   |          |   |
|----------|---|------------|---|------------|---|----------|---|
| EPC1     | 2 | LMBR1      | 2 | ITPKC      | 3 | C12orf55 | 2 |
| Ernn     | 2 | LOC1001327 | 2 | KCNN2      | 3 | C15orf39 | 2 |
| ETNK1    | 2 | LOC1005055 | 2 | KIAA1244   | 3 | C16orf74 | 2 |
| F3       | 2 | LOC1009967 | 2 | KIF5C      | 3 | C17orf70 | 2 |
| FABP5    | 2 | LOC1010605 | 2 | KIF9       | 3 | C17orf97 | 2 |
| FAM101B  | 2 | LOC646862  | 2 | KRT10      | 3 | C19orf33 | 2 |
| FAM20C   | 2 | LOXL1      | 2 | LMAN2      | 3 | C1GALT1  | 2 |
| FAM24A   | 2 | LPL        | 2 | LNX2       | 3 | C1orf174 | 2 |
| FAM72A   | 2 | LRRTM3     | 2 | LOC1019270 | 3 | C20ORF85 | 2 |
| FAM76B   | 2 | LYPD4      | 2 | LOC1019275 | 3 | C2ORF16  | 2 |
| FASLG    | 2 | MAP1A      | 2 | LOC1019280 | 3 | C3orf27  | 2 |
| FBXL4    | 2 | MAP3K6     | 2 | LOC1019296 | 3 | C9ORF96  | 2 |
| FEZF1    | 2 | MARS2      | 2 | LOC1019302 | 3 | CACNG7   | 2 |
| FIS1     | 2 | MCCD1      | 2 | LOC285500  | 3 | CALML3   | 2 |
| FKBP14   | 2 | MCTP1      | 2 | LOC646862  | 3 | CAPN12   | 2 |
| FNIP2    | 2 | MLLT3      | 2 | LRIG3      | 3 | CARD9    | 2 |
| FOSB     | 2 | MMGT1      | 2 | LRRC8E     | 3 | CASP2    | 2 |
| FOXG1    | 2 | MMS19      | 2 | LYPD4      | 3 | CASP3    | 2 |
| FOXO3    | 2 | MRGPRX4    | 2 | MAD2L1     | 3 | CCDC121  | 2 |
| FRS3     | 2 | MRPL48     | 2 | MAGEB1     | 3 | CCDC135  | 2 |
| FUT10    | 2 | MS4A12     | 2 | MAPK15     | 3 | CCDC22   | 2 |
| FUT5     | 2 | MUC13      | 2 | MCU        | 3 | CCDC80   | 2 |
| FZR1     | 2 | MYH10      | 2 | MINPP1     | 3 | CCL13    | 2 |
| GAB1     | 2 | NAMPT      | 2 | MRPL30     | 3 | CCNC     | 2 |
| GABRE    | 2 | NARS       | 2 | MTHFD2L    | 3 | CD109    | 2 |
| GABRP    | 2 | NDUFA11    | 2 | MTHFS      | 3 | CD300E   | 2 |
| GALNTL5  | 2 | NDUFV2     | 2 | MTMR11     | 3 | CD69     | 2 |
| GARS     | 2 | NECAB2     | 2 | MXI1       | 3 | CD79B    | 2 |
| GCA      | 2 | NETO2      | 2 | MYOC       | 3 | CD97     | 2 |
| GDAP1    | 2 | NEUROG2    | 2 | NAPEPLD    | 3 | CDC123   | 2 |
| GGT2     | 2 | NFKB2      | 2 | Nbas       | 3 | CDCP1    | 2 |
| GIP      | 2 | NIP7       | 2 | NDOR1      | 3 | CDH16    | 2 |
| GLTSCR1L | 2 | NLRP3      | 2 | NDUFA4L2   | 3 | CDK3     | 2 |
| GNAT1    | 2 | NME2       | 2 | NES        | 3 | CDV3     | 2 |
| GPBP1    | 2 | NUP210     | 2 | NFAT5      | 3 | CELF6    | 2 |
| GPBP1L1  | 2 | NXN        | 2 | NOP10      | 3 | CEP76    | 2 |
| GPR116   | 2 | OLFML1     | 2 | NOTO       | 3 | CEP85L   | 2 |
| GPR171   | 2 | OPTC       | 2 | NT5DC4     | 3 | CEP89    | 2 |
| GPR65    | 2 | OR11H4     | 2 | NT5M       | 3 | Cers2    | 2 |
| GPR83    | 2 | OR12D3     | 2 | NUP210     | 3 | CFDP1    | 2 |
| GRIN3A   | 2 | OR1L6      | 2 | NUP62CL    | 3 | CHIC1    | 2 |
| GRXCR1   | 2 | OR8G2      | 2 | NUS1       | 3 | CHRNA4   | 2 |
| GRXCR2   | 2 | PADI1      | 2 | OPHN1      | 3 | CHRNA4   | 2 |

|             |   |          |   |          |   |          |   |
|-------------|---|----------|---|----------|---|----------|---|
| GS1-259H13. | 2 | PAM      | 2 | OPTN     | 3 | Cisd2    | 2 |
| GTF2B       | 2 | PAQR6    | 2 | OR2F2    | 3 | CLCN6    | 2 |
| GTF2H1      | 2 | PATL1    | 2 | OR5K1    | 3 | CLEC2A   | 2 |
| GTPBP6      | 2 | PBK      | 2 | OR7A17   | 3 | CLINT1   | 2 |
| GYG1        | 2 | PCDH1    | 2 | OSBPL7   | 3 | CLIP1    | 2 |
| GYS1        | 2 | PCDHGB4  | 2 | PACSIN2  | 3 | CLPB     | 2 |
| HIST1H4F    | 2 | PDE1A    | 2 | PAQR9    | 3 | CLSTN1   | 2 |
| HJURP       | 2 | PGP      | 2 | PCBP2    | 3 | CNGA2    | 2 |
| HOMER1      | 2 | PHF2     | 2 | PCDHGC4  | 3 | CNTN1    | 2 |
| HOXB4       | 2 | PJA1     | 2 | PDCD4    | 3 | COL25A1  | 2 |
| HSF1        | 2 | PML      | 2 | PDZD3    | 3 | COL6A1   | 2 |
| HSPB7       | 2 | PMM2     | 2 | PIK3AP1  | 3 | COPRS    | 2 |
| HYPK        | 2 | POLR2K   | 2 | PMM1     | 3 | CORO2B   | 2 |
| IDH3G       | 2 | POU6F1   | 2 | PNLDC1   | 3 | COX14    | 2 |
| IDUA        | 2 | PPM1J    | 2 | PNPLA4   | 3 | CPAMD8   | 2 |
| IFNL4       | 2 | PQBP1    | 2 | PPFIA4   | 3 | Crybg3   | 2 |
| IGLL5       | 2 | PRDM15   | 2 | PPM1G    | 3 | CSNK1D   | 2 |
| IL17B       | 2 | PREPL    | 2 | PPP1R11  | 3 | CTNNB1   | 2 |
| ING1        | 2 | PTGES3   | 2 | PPP3CA   | 3 | CTTN     | 2 |
| ITGB7       | 2 | PTPRG    | 2 | Ppp6r2   | 3 | CXCR4    | 2 |
| JADE3       | 2 | RAB2A    | 2 | RAC1     | 3 | CXorf49  | 2 |
| KANSL1L     | 2 | RAD54L2  | 2 | REC8     | 3 | CYFIP1   | 2 |
| KCNE2       | 2 | RAE1     | 2 | REPS2    | 3 | CYP1A1   | 2 |
| KCNH3       | 2 | RANBP17  | 2 | RGAG1    | 3 | CYP1B1   | 2 |
| KCNJ9       | 2 | RBMY1J   | 2 | RGCC     | 3 | CYP39A1  | 2 |
| KCNN1       | 2 | RFPL4AL1 | 2 | RIPK2    | 3 | CYP46A1  | 2 |
| KDM6A       | 2 | RNF7     | 2 | RNF41    | 3 | CYR61    | 2 |
| KIAA0753    | 2 | RRAS     | 2 | RSPO3    | 3 | DCAF4    | 2 |
| KIR3DL3     | 2 | S1PR5    | 2 | RYBP     | 3 | DEFB103A | 2 |
| KLRF1       | 2 | SCAP     | 2 | SCN4B    | 3 | DENND1C  | 2 |
| KRAS        | 2 | SDC2     | 2 | SEMA4G   | 3 | DENND5A  | 2 |
| KRTAP13-1   | 2 | SEC24A   | 2 | SERBP1   | 3 | DHX29    | 2 |
| LAMP5       | 2 | SH3TC1   | 2 | SEZ6L    | 3 | DHX40    | 2 |
| LCA5        | 2 | SIDT1    | 2 | SH3RF3   | 3 | DIAPH2   | 2 |
| LCE5A       | 2 | SLC22A2  | 2 | SIDT1    | 3 | DIS3L    | 2 |
| LCN12       | 2 | SLC25A3  | 2 | SLC25A12 | 3 | DLX5     | 2 |
| LCN2        | 2 | SLC2A14  | 2 | SLC25A23 | 3 | DMC1     | 2 |
| LGMN        | 2 | SLC36A3  | 2 | SLC32A1  | 3 | DNASE2B  | 2 |
| LHX1        | 2 | SLC6A18  | 2 | SLC45A2  | 3 | DNMT3B   | 2 |
| LILRA2      | 2 | SLC9A5   | 2 | SLC6A18  | 3 | DPEP1    | 2 |
| LIN28B      | 2 | SLIT2    | 2 | SMAD6    | 3 | DPP8     | 2 |
| LNX2        | 2 | SP110    | 2 | SPAG17   | 3 | DRAP1    | 2 |
| LOC1001303  | 2 | SPAG17   | 2 | STYK1    | 3 | DSCR3    | 2 |

|            |   |             |   |          |   |         |   |
|------------|---|-------------|---|----------|---|---------|---|
| LOC1002889 | 2 | SPG7        | 2 | SUPT4H1  | 3 | DSCR4   | 2 |
| LOC1005055 | 2 | SRRD        | 2 | THBS2    | 3 | DSG2    | 2 |
| LOC1009966 | 2 | STAB1       | 2 | TMED9    | 3 | DTD1    | 2 |
| LOC1009967 | 2 | STARD3NL    | 2 | TMEM216  | 3 | DTL     | 2 |
| LOC1019282 | 2 | STPG2       | 2 | TMEM45B  | 3 | DUSP5   | 2 |
| LOC1019299 | 2 | STRBP       | 2 | Tox2     | 3 | DUXA    | 2 |
| LOC285500  | 2 | SYNJ2       | 2 | TPD52L2  | 3 | Eapp    | 2 |
| LOC389831  | 2 | TARSL2      | 2 | TRABD2B  | 3 | EDNRB   | 2 |
| LOC646862  | 2 | TCEA3       | 2 | TRIM49D1 | 3 | EEF2    | 2 |
| LOC729159  | 2 | TCN2        | 2 | TRPM2    | 3 | EEFSEC  | 2 |
| LRFN1      | 2 | TIMM17A     | 2 | TSTD1    | 3 | EGLN2   | 2 |
| LRRC70     | 2 | TIMP3       | 2 | TTC14    | 3 | EHD3    | 2 |
| MANSC1     | 2 | TK2         | 2 | Ttc23l   | 3 | EIF4G3  | 2 |
| MCC        | 2 | TMEM165     | 2 | TTC7B    | 3 | ELF5    | 2 |
| MDK        | 2 | TMEM216     | 2 | UBL4A    | 3 | ELOVL1  | 2 |
| MECOM      | 2 | Tmem237     | 2 | UHMK1    | 3 | EMC1    | 2 |
| METRNL     | 2 | TMEM41B     | 2 | UNC13D   | 3 | EPHB2   | 2 |
| MFSD6      | 2 | TMEM9       | 2 | UXS1     | 3 | ERBB2IP | 2 |
| MROH2B     | 2 | TNFRSF13C   | 2 | VTN      | 3 | Ernm    | 2 |
| MRPL39     | 2 | TRAM1       | 2 | WDR31    | 3 | ERP44   | 2 |
| MRPS11     | 2 | TRH         | 2 | ZBTB32   | 3 | EVI2B   | 2 |
| MRPS36     | 2 | TRIM39-RPP2 | 2 | ZC3HC1   | 3 | EXO1    | 2 |
| Ms4a15     | 2 | Ttc39a      | 2 | ZFYVE19  | 3 | FAM110B | 2 |
| MTNR1B     | 2 | TUBGCP5     | 2 | ZNF300   | 3 | FAM129C | 2 |
| NAT16      | 2 | TVP23B      | 2 | ZSCAN16  | 3 | FAM175B | 2 |
| NBPF9      | 2 | TYROBP      | 2 | MARCH9   | 2 | FAM185A | 2 |
| NCAM1      | 2 | URB1        | 2 | SEPT1    | 2 | FAM209A | 2 |
| NEU2       | 2 | USP9X       | 2 | SEPT8    | 2 | FAM20C  | 2 |
| NFE2L1     | 2 | VPS4A       | 2 | A2ML1    | 2 | FAM217B | 2 |
| NHS        | 2 | YAP1        | 2 | AADACL4  | 2 | FAM25A  | 2 |
| NKAIN3     | 2 | YEATS4      | 2 | AARSD1   | 2 | FAM43B  | 2 |
| NNAT       | 2 | ZBTB8B      | 2 | ABCC3    | 2 | FAM98B  | 2 |
| NPAS1      | 2 | ZNF282      | 2 | ABCG5    | 2 | FASLG   | 2 |
| NPL        | 2 | ZNF500      | 2 | ABHD2    | 2 | FBXO48  | 2 |
| NPM3       | 2 | ZNF502      | 2 | ACOT13   | 2 | FBXW5   | 2 |
| NPPB       | 2 | ZNF606      | 2 | ACSF3    | 2 | FCGR3B  | 2 |
| NR1H4      | 2 | ZNF652      | 2 | ACSM3    | 2 | FER1L5  | 2 |
| NRIP2      | 2 | ZNF727P     | 2 | ACTC1    | 2 | FEV     | 2 |
| NUAK1      | 2 | ZNF80       | 2 | ACTL9    | 2 | FGD4    | 2 |
| NUDT12     | 2 |             |   | ACY1     | 2 | FGF10   | 2 |
| NUS1       | 2 |             |   | ACYP2    | 2 | FHAD1   | 2 |
| ODF1       | 2 |             |   | ADAM20   | 2 | FNIP2   | 2 |
| OLFML1     | 2 |             |   | ADAMTS10 | 2 | FOSL2   | 2 |

|         |   |
|---------|---|
| ONECUT3 | 2 |
| OPN1LW  | 2 |
| OR10A3  | 2 |
| OR10H1  | 2 |
| OR10Z1  | 2 |
| OR2C1   | 2 |
| OR51B5  | 2 |
| OR52L1  | 2 |
| OR5AS1  | 2 |
| OR5B12  | 2 |
| OR6C75  | 2 |
| OR7A5   | 2 |
| OR9Q2   | 2 |
| ORM2    | 2 |
| OSBPL9  | 2 |
| P4HB    | 2 |
| PALB2   | 2 |
| PALMD   | 2 |
| PAM     | 2 |
| PAOX    | 2 |
| PCDHA3  | 2 |
| PCDHA5  | 2 |
| PCYT1A  | 2 |
| PDCD1   | 2 |
| PDE1A   | 2 |
| PDHB    | 2 |
| PDZRN3  | 2 |
| PEX11B  | 2 |
| Phax    | 2 |
| PHLPP1  | 2 |
| PIBF1   | 2 |
| PJA2    | 2 |
| PLA2G1B | 2 |
| PLEKHO1 | 2 |
| POLR1A  | 2 |
| PPIAL4C | 2 |
| PPIB    | 2 |
| PPM1J   | 2 |
| PRKAG3  | 2 |
| PRR11   | 2 |
| Prrt4   | 2 |
| PRSS12  | 2 |
| PRTN3   | 2 |

|           |   |            |   |
|-----------|---|------------|---|
| Adcy10    | 2 | FRG2C      | 2 |
| ADD1      | 2 | FRMD3      | 2 |
| ADGB      | 2 | FRMD8      | 2 |
| ADPRH     | 2 | FSCN2      | 2 |
| AGBL4     | 2 | FUT8       | 2 |
| AGT       | 2 | FYN        | 2 |
| AICDA     | 2 | GALM       | 2 |
| AIF1L     | 2 | GALNT18    | 2 |
| AIFM3     | 2 | GBP3       | 2 |
| AKAP8     | 2 | GCM2       | 2 |
| AKR1B15   | 2 | GHR        | 2 |
| AKT1S1    | 2 | GJC3       | 2 |
| AKT2      | 2 | GLT8D2     | 2 |
| ALDH16A1  | 2 | GLTSCR1L   | 2 |
| ALDH1A1   | 2 | GLYR1      | 2 |
| ALDOB     | 2 | GOLGA6L4   | 2 |
| ALK       | 2 | GPIHBP1    | 2 |
| ALKBH5    | 2 | GPR143     | 2 |
| ALKBH6    | 2 | GPR75-ASB3 | 2 |
| AMACR     | 2 | GRM2       | 2 |
| AMIGO1    | 2 | GSTP1      | 2 |
| AMY1B     | 2 | GTF2H1     | 2 |
| ANKLE2    | 2 | GUCY2F     | 2 |
| ANKRD20A2 | 2 | GYG2       | 2 |
| ANKRD23   | 2 | HACE1      | 2 |
| ANKRD35   | 2 | HDGFRP3    | 2 |
| ANKS1A    | 2 | HDLBP      | 2 |
| ANO6      | 2 | HES7       | 2 |
| ANPEP     | 2 | HFM1       | 2 |
| ANXA7     | 2 | HGD        | 2 |
| AP1S1     | 2 | HGS        | 2 |
| AP2A2     | 2 | HIST2H4B   | 2 |
| AP2M1     | 2 | HLA-F      | 2 |
| AP3B1     | 2 | Hmgn5      | 2 |
| AP3D1     | 2 | HOMER1     | 2 |
| AP5S1     | 2 | HOXB4      | 2 |
| APEX1     | 2 | HPCAL1     | 2 |
| APOBEC3A  | 2 | HSBP1L1    | 2 |
| APOC2     | 2 | HSD3B2     | 2 |
| APOC3     | 2 | HVCN1      | 2 |
| APP       | 2 | HYI        | 2 |
| AR        | 2 | ID3        | 2 |
| ARF4      | 2 | IFNA2      | 2 |

|          |   |
|----------|---|
| PSME4    | 2 |
| PTCH1    | 2 |
| PVALB    | 2 |
| PVRL2    | 2 |
| QRICH2   | 2 |
| RAP1GDS1 | 2 |
| RBL2     | 2 |
| RCN2     | 2 |
| REL      | 2 |
| RFPL2    | 2 |
| RFPL4B   | 2 |
| RIPK2    | 2 |
| RNASE6   | 2 |
| RNF111   | 2 |
| RNF115   | 2 |
| RNF150   | 2 |
| ROBO4    | 2 |
| RTKN     | 2 |
| RTN4RL1  | 2 |
| RUFY3    | 2 |
| RYBP     | 2 |
| S100A12  | 2 |
| S100A7   | 2 |
| SAMD1    | 2 |
| SAP130   | 2 |
| SCAF11   | 2 |
| SCARB1   | 2 |
| SDAD1    | 2 |
| SERPINA6 | 2 |
| SESN2    | 2 |
| SGSH     | 2 |
| SH2D1B   | 2 |
| SH2D7    | 2 |
| SHANK1   | 2 |
| SIT1     | 2 |
| SLC12A1  | 2 |
| SLC22A2  | 2 |
| Slc22a20 | 2 |
| SLC30A1  | 2 |
| SLC37A3  | 2 |
| SLCO5A1  | 2 |
| SMPX     | 2 |
| SNAI1    | 2 |

|           |   |              |   |
|-----------|---|--------------|---|
| ARFIP1    | 2 | IFRD2        | 2 |
| ARHGAP19  | 2 | IFT80        | 2 |
| ARHGAP30  | 2 | IGF2BP1      | 2 |
| ARHGAP44  | 2 | IKZF1        | 2 |
| ARHGAP6   | 2 | IPPK         | 2 |
| ARHGDIA   | 2 | ITGB1BP2     | 2 |
| ARHGEF10L | 2 | ITGB5        | 2 |
| ARHGEF38  | 2 | ITPR1        | 2 |
| ARL6IP5   | 2 | JOSD1        | 2 |
| ARMC9     | 2 | KCNE2        | 2 |
| ARNT2     | 2 | KCNQ3        | 2 |
| ARPC5L    | 2 | KCNV2        | 2 |
| ARSI      | 2 | KCTD17       | 2 |
| ASB16     | 2 | KIAA0226L    | 2 |
| ASCL1     | 2 | KIAA0586     | 2 |
| Aspg      | 2 | KIAA0895L    | 2 |
| ATF6B     | 2 | KIF20B       | 2 |
| ATF7IP2   | 2 | KIFC2        | 2 |
| ATG10     | 2 | KIR2DL5B     | 2 |
| ATG14     | 2 | KLF12        | 2 |
| ATG4D     | 2 | KLRK1        | 2 |
| ATOH7     | 2 | KNDC1        | 2 |
| ATP10A    | 2 | KNOP1        | 2 |
| ATP13A2   | 2 | KPNA7        | 2 |
| ATP2A3    | 2 | KRIT1        | 2 |
| ATP4B     | 2 | KRT6A        | 2 |
| ATP6AP1   | 2 | KRT7         | 2 |
| ATP6V1H   | 2 | KRTAP10-7    | 2 |
| ATXN1     | 2 | L1TD1        | 2 |
| BABAM1    | 2 | LAMB1        | 2 |
| BAGE      | 2 | LAMC2        | 2 |
| BAIAP2L2  | 2 | LARGE        | 2 |
| BAMBI     | 2 | LCN2         | 2 |
| BAP1      | 2 | LEFTY1       | 2 |
| BBS2      | 2 | LEKR1        | 2 |
| BCDIN3D   | 2 | LETMD1       | 2 |
| BCL7A     | 2 | LHFPL5       | 2 |
| BCL9L     | 2 | LIG3         | 2 |
| BCOR      | 2 | LINC00684    | 2 |
| BDH2      | 2 | LMAN2        | 2 |
| BGN       | 2 | LMNB1        | 2 |
| BHMT      | 2 | LMOD3        | 2 |
| BIRC6     | 2 | LOC100132004 | 2 |

|          |   |
|----------|---|
| Snrnp70  | 2 |
| SNRPF    | 2 |
| SNUPN    | 2 |
| SOC57    | 2 |
| SOX8     | 2 |
| SPATA22  | 2 |
| SRPK3    | 2 |
| SS18     | 2 |
| SSPN     | 2 |
| STARD3NL | 2 |
| STOM     | 2 |
| STPG1    | 2 |
| SULT1B1  | 2 |
| TAC1     | 2 |
| TAF5     | 2 |
| TCERG1L  | 2 |
| TCTN3    | 2 |
| TG       | 2 |
| TGFBR3L  | 2 |
| TICRR    | 2 |
| TLE4     | 2 |
| TMEM126A | 2 |
| TMEM198  | 2 |
| TMEM218  | 2 |
| TMEM240  | 2 |
| TMEM241  | 2 |
| TMTC3    | 2 |
| TNFRSF17 | 2 |
| TNFSF14  | 2 |
| TNK1     | 2 |
| TOMM34   | 2 |
| TOR3A    | 2 |
| TRIM16L  | 2 |
| TRIM54   | 2 |
| TRIM56   | 2 |
| TRIM60   | 2 |
| TSHZ3    | 2 |
| TSPAN12  | 2 |
| TSPAN5   | 2 |
| Tti2     | 2 |
| UBB      | 2 |
| ULBP3    | 2 |
| USP51    | 2 |

|              |   |              |   |
|--------------|---|--------------|---|
| BLOC1S3      | 2 | LOC100132731 | 2 |
| BOK          | 2 | LOC100287294 | 2 |
| BOLA2B       | 2 | LOC100288562 | 2 |
| BPIFA3       | 2 | LOC100509091 | 2 |
| BPIFB2       | 2 | LOC100652901 | 2 |
| BRINP1       | 2 | LOC101059914 | 2 |
| BRIP1        | 2 | LOC101060022 | 2 |
| BRPF1        | 2 | LOC101060179 | 2 |
| BRSK2        | 2 | LOC101060861 | 2 |
| BTLA         | 2 | LOC101927594 | 2 |
| BTN1A1       | 2 | LOC101927751 | 2 |
| BTNL10       | 2 | LOC101928044 | 2 |
| C10ORF11     | 2 | LOC101928638 | 2 |
| C11orf82     | 2 | LOC101928728 | 2 |
| C11orf91     | 2 | LOC101929097 | 2 |
| C12orf71     | 2 | LOC101929469 | 2 |
| C14ORF169    | 2 | LOC101929571 | 2 |
| C14ORF2      | 2 | LOC101930006 | 2 |
| C15orf38-AP3 | 2 | LOC101930125 | 2 |
| C15orf54     | 2 | LOC101930480 | 2 |
| C16orf80     | 2 | LOC101930551 | 2 |
| C17orf104    | 2 | LOC391722    | 2 |
| C17orf64     | 2 | LRFN3        | 2 |
| C18orf63     | 2 | LRIG3        | 2 |
| C1GALT1      | 2 | LRRC19       | 2 |
| C1GALT1C1    | 2 | LRRC42       | 2 |
| C1orf159     | 2 | LRRC43       | 2 |
| C1orf85      | 2 | LRRC73       | 2 |
| C1orf95      | 2 | LRRC8E       | 2 |
| C1QTNF3      | 2 | LSM4         | 2 |
| C1R          | 2 | LY6E         | 2 |
| C1S          | 2 | LY6G6C       | 2 |
| C20orf196    | 2 | LYPD1        | 2 |
| C20ORF85     | 2 | MAD2L1       | 2 |
| C21ORF33     | 2 | MAN1C1       | 2 |
| C2orf81      | 2 | MAP3K15      | 2 |
| C3orf58      | 2 | MCHR1        | 2 |
| C5orf24      | 2 | MCOLN1       | 2 |
| C5orf42      | 2 | MCPH1        | 2 |
| C5orf51      | 2 | MEA1         | 2 |
| C5orf58      | 2 | MED29        | 2 |
| C6           | 2 | METTL11B     | 2 |
| C8orf37      | 2 | MFSD4        | 2 |

|         |   |
|---------|---|
| VGF     | 2 |
| VPS11   | 2 |
| VPS52   | 2 |
| VSTM5   | 2 |
| WBP11   | 2 |
| WDR17   | 2 |
| XPNPEP1 | 2 |
| YAP1    | 2 |
| YARS    | 2 |
| ZBED3   | 2 |
| ZBTB14  | 2 |
| ZBTB7C  | 2 |
| ZC3H3   | 2 |
| ZMYM2   | 2 |
| ZNF132  | 2 |
| ZNF19   | 2 |
| ZNF20   | 2 |
| ZNF215  | 2 |
| ZNF264  | 2 |
| ZNF560  | 2 |
| ZNF569  | 2 |
| ZNF585B | 2 |
| ZNF8    | 2 |
| ZSCAN16 | 2 |
| ZSCAN32 | 2 |

|          |   |         |   |
|----------|---|---------|---|
| C8orf76  | 2 | MIER3   | 2 |
| C9orf172 | 2 | MIXL1   | 2 |
| C9ORF37  | 2 | MKL2    | 2 |
| CA6      | 2 | MLPH    | 2 |
| CAB39    | 2 | MMADHC  | 2 |
| CABP5    | 2 | MON1B   | 2 |
| CABYR    | 2 | MRPL24  | 2 |
| CACNG3   | 2 | MRPS18C | 2 |
| CALD1    | 2 | MS4A12  | 2 |
| CALML5   | 2 | Ms4a15  | 2 |
| CAPZA1   | 2 | MSLN    | 2 |
| CARHSP1  | 2 | MSS51   | 2 |
| CARM1    | 2 | MTFR1   | 2 |
| CASC10   | 2 | MTHFR   | 2 |
| CASP5    | 2 | MTUS2   | 2 |
| CASQ1    | 2 | MTX2    | 2 |
| CATSPER4 | 2 | NAA35   | 2 |
| CBX6     | 2 | NAAA    | 2 |
| CCDC115  | 2 | NAB1    | 2 |
| CCDC12   | 2 | NAV3    | 2 |
| CCDC121  | 2 | NCKAP1L | 2 |
| CCDC13   | 2 | NDRG3   | 2 |
| Ccdc138  | 2 | NDST2   | 2 |
| CCDC176  | 2 | NEDD4   | 2 |
| CCDC178  | 2 | NEUROG2 | 2 |
| CCDC27   | 2 | NFE2L3  | 2 |
| CCDC30   | 2 | NKG7    | 2 |
| CCDC53   | 2 | NKPD1   | 2 |
| CCDC54   | 2 | NMRAL1  | 2 |
| CCDC91   | 2 | NMUR2   | 2 |
| CCK      | 2 | NOL4    | 2 |
| CCL4L2   | 2 | NOTCH1  | 2 |
| CCM2L    | 2 | NOTCH2  | 2 |
| CCND2    | 2 | NPAS1   | 2 |
| CCNE1    | 2 | NPNT    | 2 |
| CCNE2    | 2 | NPY4R   | 2 |
| CCT8     | 2 | NRD1    | 2 |
| CCZ1B    | 2 | NSUN3   | 2 |
| Cd101    | 2 | NT5DC4  | 2 |
| CD226    | 2 | NT5M    | 2 |
| CD302    | 2 | NUMA1   | 2 |
| CD69     | 2 | NUP210  | 2 |
| CD96     | 2 | NUP62CL | 2 |

|          |   |         |   |
|----------|---|---------|---|
| CDC25A   | 2 | NXN     | 2 |
| CDC42BPA | 2 | OLFM2   | 2 |
| CDCA7L   | 2 | ONECUT3 | 2 |
| CDK1     | 2 | OR11A1  | 2 |
| CDK2AP1  | 2 | OR12D2  | 2 |
| CDK3     | 2 | OR12D3  | 2 |
| CDKN3    | 2 | OR13C2  | 2 |
| CDY2A    | 2 | OR14J1  | 2 |
| CELF6    | 2 | OR1L3   | 2 |
| CEP135   | 2 | OR2AG2  | 2 |
| CEP170B  | 2 | OR2F2   | 2 |
| CER1     | 2 | OR4K2   | 2 |
| CERKL    | 2 | OR4M1   | 2 |
| CFD      | 2 | OR4M2   | 2 |
| CHAMP1   | 2 | OR4N4   | 2 |
| CHCHD6   | 2 | OR4P4   | 2 |
| CHD2     | 2 | OR5A2   | 2 |
| CHGA     | 2 | OR5K1   | 2 |
| CHPT1    | 2 | OR6M1   | 2 |
| CHRFAM7A | 2 | OR8D1   | 2 |
| CHST8    | 2 | OVCA2   | 2 |
| CIB3     | 2 | OXSM    | 2 |
| CIDEC    | 2 | PACS1   | 2 |
| CITED2   | 2 | PAGE2B  | 2 |
| CIZ1     | 2 | PAK6    | 2 |
| CKM      | 2 | PARP10  | 2 |
| CLCF1    | 2 | PBX2    | 2 |
| CLCNKB   | 2 | PCCA    | 2 |
| CLDN17   | 2 | PCDH1   | 2 |
| CLDN19   | 2 | PCDHA12 | 2 |
| CLDN7    | 2 | PCDHGB3 | 2 |
| CLEC6A   | 2 | PCDHGC5 | 2 |
| CLIP3    | 2 | PCDP1   | 2 |
| CLK2     | 2 | PCYT1B  | 2 |
| CLK4     | 2 | PDCD2L  | 2 |
| CLRN2    | 2 | PDCD4   | 2 |
| CNDP1    | 2 | PDDC1   | 2 |
| CNGB1    | 2 | PDE12   | 2 |
| CNIH3    | 2 | PDZRN3  | 2 |
| CNN2     | 2 | PGP     | 2 |
| CNTD1    | 2 | PHF14   | 2 |
| COA5     | 2 | PHF2    | 2 |
| COG2     | 2 | PHKG1   | 2 |



|            |   |          |   |
|------------|---|----------|---|
| COL24A1    | 2 | PI3      | 2 |
| COL2A1     | 2 | PIK3C2A  | 2 |
| COL4A2     | 2 | PKD1     | 2 |
| COQ7       | 2 | PKDREJ   | 2 |
| CORIN      | 2 | PKN1     | 2 |
| COX5A      | 2 | PLA2G3   | 2 |
| COX7A2     | 2 | PLAGL1   | 2 |
| COX8A      | 2 | PLCG2    | 2 |
| CP         | 2 | PLK1     | 2 |
| CPNE1      | 2 | PLXNA2   | 2 |
| CPNE5      | 2 | PML      | 2 |
| CPNE9      | 2 | PNLIPRP2 | 2 |
| CPO        | 2 | POLA1    | 2 |
| CR1        | 2 | POLR2B   | 2 |
| CRADD      | 2 | POLR2F   | 2 |
| CRISP2     | 2 | PORCN    | 2 |
| CRKL       | 2 | POU2F3   | 2 |
| CSAG1      | 2 | POU6F2   | 2 |
| CSF1       | 2 | PPM1A    | 2 |
| CSF2       | 2 | PPP2R1A  | 2 |
| CSF2RB     | 2 | PQBP1    | 2 |
| Csgalnact1 | 2 | PRAMEF10 | 2 |
| CST7       | 2 | PRC1     | 2 |
| CT83       | 2 | PRDM15   | 2 |
| CTLA4      | 2 | PRKAR1A  | 2 |
| CTNNA1     | 2 | PRKDC    | 2 |
| CTSF       | 2 | PRSS46   | 2 |
| CUL5       | 2 | PRSS54   | 2 |
| CWC27      | 2 | Prss58   | 2 |
| CYB5R4     | 2 | PSAT1    | 2 |
| CYP27B1    | 2 | Ptpmt1   | 2 |
| CYP2U1     | 2 | PTPN20B  | 2 |
| DAPK1      | 2 | PTPN7    | 2 |
| DAPK2      | 2 | QTRT1    | 2 |
| DAPL1      | 2 | RAB11B   | 2 |
| DAZ2       | 2 | RAD23B   | 2 |
| DAZAP2     | 2 | RAPGEF6  | 2 |
| DCAF15     | 2 | RASAL1   | 2 |
| DCLRE1B    | 2 | RASAL3   | 2 |
| DCUN1D5    | 2 | RASD1    | 2 |
| DDI1       | 2 | RASIP1   | 2 |
| DDO        | 2 | RBBP6    | 2 |
| DDX26B     | 2 | RBBP9    | 2 |

|         |   |           |   |
|---------|---|-----------|---|
| DDX39A  | 2 | RBP3      | 2 |
| DDX51   | 2 | RCAN3     | 2 |
| DEFA1B  | 2 | RDH13     | 2 |
| DEFA4   | 2 | RET       | 2 |
| DEFB127 | 2 | RG517     | 2 |
| DEGS1   | 2 | RG522     | 2 |
| DENND5A | 2 | RHOBTB3   | 2 |
| DERA    | 2 | RHOT2     | 2 |
| DHCR7   | 2 | RNASE6    | 2 |
| DHRS7B  | 2 | RNF186    | 2 |
| DHX33   | 2 | RNF26     | 2 |
| DICER1  | 2 | RPGR      | 2 |
| DIS3L2  | 2 | RPL37     | 2 |
| DKK1    | 2 | RPL6      | 2 |
| DLD     | 2 | RPS6KB1   | 2 |
| DLX2    | 2 | RRH       | 2 |
| DMRT1   | 2 | RRP1      | 2 |
| DMXL2   | 2 | RTP3      | 2 |
| DNAI1   | 2 | RUFY3     | 2 |
| DNAJB1  | 2 | S100A1    | 2 |
| DNAJB6  | 2 | SCAMP2    | 2 |
| DNAJC18 | 2 | SCARB2    | 2 |
| DNAJC22 | 2 | SEC31B    | 2 |
| DOK1    | 2 | SEH1L     | 2 |
| DPF3    | 2 | SENP2     | 2 |
| DRG2    | 2 | SERINC2   | 2 |
| DTX3    | 2 | SERINC4   | 2 |
| DTX4    | 2 | SERPINB12 | 2 |
| DUS4L   | 2 | SERPINH1  | 2 |
| DUSP12  | 2 | SFTPD     | 2 |
| DUSP21  | 2 | SGCB      | 2 |
| DUSP3   | 2 | SHKBP1    | 2 |
| DVL3    | 2 | SHOX      | 2 |
| DYNC2H1 | 2 | SIK3      | 2 |
| E2F2    | 2 | SIRT1     | 2 |
| ECHDC2  | 2 | SLC12A4   | 2 |
| EDC4    | 2 | SLC16A14  | 2 |
| EEA1    | 2 | SLC1A5    | 2 |
| EED     | 2 | SLC22A3   | 2 |
| EFCAB1  | 2 | SLC26A7   | 2 |
| EFCAB12 | 2 | SLC31A1   | 2 |
| EFCAB13 | 2 | SLC4A4    | 2 |
| EFCAB3  | 2 | SLC4A7    | 2 |

|          |   |              |   |
|----------|---|--------------|---|
| EFHC1    | 2 | SLC9C1       | 2 |
| EIF2AK2  | 2 | SLCO2B1      | 2 |
| EIF4A1   | 2 | SMN2         | 2 |
| EIF4E3   | 2 | SNAI1        | 2 |
| EIF5     | 2 | Snrrp25      | 2 |
| ELF4     | 2 | SNRNP27      | 2 |
| ELMOD3   | 2 | SNX1         | 2 |
| EML4     | 2 | SNX4         | 2 |
| ENKD1    | 2 | SOC55        | 2 |
| ENPP1    | 2 | SOWAHD       | 2 |
| ENPP3    | 2 | SPATA31A6    | 2 |
| ENTPD1   | 2 | SPIN2B       | 2 |
| EPB41L4A | 2 | SPRR2E       | 2 |
| EPHA4    | 2 | SRD5A1       | 2 |
| EPHB2    | 2 | SRI          | 2 |
| EPHX3    | 2 | SSTR1        | 2 |
| ERAP2    | 2 | SSX2         | 2 |
| ERI1     | 2 | ST3GAL5      | 2 |
| ERICH1   | 2 | STK24        | 2 |
| ERICH4   | 2 | STK38        | 2 |
| ERICH6   | 2 | STK4         | 2 |
| Erlec1   | 2 | STOM         | 2 |
| EVA1B    | 2 | STRIP2       | 2 |
| EVX2     | 2 | SULT2B1      | 2 |
| EXD1     | 2 | SVIL         | 2 |
| EXOSC4   | 2 | SYNJ2BP-COX1 | 2 |
| EYS      | 2 | SYT1         | 2 |
| F13B     | 2 | TAS2R19      | 2 |
| FAF1     | 2 | TBL3         | 2 |
| FAM110C  | 2 | TBX10        | 2 |
| FAM120A  | 2 | TEX11        | 2 |
| FAM124A  | 2 | TEX29        | 2 |
| FAM133A  | 2 | TFAM         | 2 |
| FAM134B  | 2 | TGFBR3L      | 2 |
| FAM153B  | 2 | TGM6         | 2 |
| FAM160A1 | 2 | THEM4        | 2 |
| FAM163A  | 2 | TIMM22       | 2 |
| FAM173B  | 2 | TMEM114      | 2 |
| Fam174b  | 2 | TMEM132E     | 2 |
| FAM177A1 | 2 | TMEM138      | 2 |
| Fam181b  | 2 | TMEM144      | 2 |
| FAM195B  | 2 | TMEM165      | 2 |
| FAM19A1  | 2 | TMEM176B     | 2 |

|          |   |              |   |
|----------|---|--------------|---|
| FAM25A   | 2 | TMSB4Y       | 2 |
| FAM43B   | 2 | TNFAIP3      | 2 |
| FAM50B   | 2 | TNFSF12      | 2 |
| FAM58A   | 2 | TNPO3        | 2 |
| FAM65A   | 2 | Tomm20l      | 2 |
| FAM76B   | 2 | TOMM34       | 2 |
| FAM78B   | 2 | TRADD        | 2 |
| FAM83A   | 2 | TRAF5        | 2 |
| FANCL    | 2 | TRAP1        | 2 |
| FAT3     | 2 | TRAPPC9      | 2 |
| FBXO4    | 2 | TRIB1        | 2 |
| FBXW2    | 2 | TRIM24       | 2 |
| FERMT1   | 2 | TRIM51       | 2 |
| FETUB    | 2 | TRIOBP       | 2 |
| FFAR2    | 2 | TRIP10       | 2 |
| FGF10    | 2 | TRPV3        | 2 |
| FGL2     | 2 | TSPAN11      | 2 |
| FHIT     | 2 | TSSK4        | 2 |
| FHL3     | 2 | TTC5         | 2 |
| FKBP2    | 2 | TTL          | 2 |
| FN3KRP   | 2 | TVP23C-CDRT4 | 2 |
| FOXN2    | 2 | UBE2D2       | 2 |
| FPR2     | 2 | UBE2E3       | 2 |
| FRA10AC1 | 2 | UBE2QL1      | 2 |
| FRAT1    | 2 | UBR7         | 2 |
| FREM2    | 2 | UNK          | 2 |
| FSTL5    | 2 | UPF3A        | 2 |
| FUT7     | 2 | URB1         | 2 |
| FUT8     | 2 | USP3         | 2 |
| GAB1     | 2 | USP51        | 2 |
| GADD45B  | 2 | USP9Y        | 2 |
| GADD45G  | 2 | UTRN         | 2 |
| GALNT11  | 2 | VCPIP1       | 2 |
| GALNT14  | 2 | VIL1         | 2 |
| GALNT18  | 2 | VMO1         | 2 |
| GAPT     | 2 | VPS26A       | 2 |
| GAS6     | 2 | VPS45        | 2 |
| GBP2     | 2 | VPS52        | 2 |
| GCM2     | 2 | VRK3         | 2 |
| GCSH     | 2 | Vsig10       | 2 |
| GET4     | 2 | WBSCR27      | 2 |
| GIMAP1   | 2 | WRN          | 2 |
| GIMAP7   | 2 | Zc3h18       | 2 |

|          |   |          |   |
|----------|---|----------|---|
| GJC3     | 2 | ZC3H3    | 2 |
| GKN2     | 2 | ZC3H7A   | 2 |
| GLCCI1   | 2 | ZDHH1    | 2 |
| GLRA1    | 2 | ZDHH9    | 2 |
| GMFG     | 2 | ZMPSTE24 | 2 |
| GMIP     | 2 | ZNF202   | 2 |
| GNB2     | 2 | ZNF229   | 2 |
| GNL1     | 2 | ZNF319   | 2 |
| GOLGA6L1 | 2 | ZNF329   | 2 |
| GON4L    | 2 | ZNF331   | 2 |
| GP6      | 2 | ZNF445   | 2 |
| GPATCH11 | 2 | ZNF473   | 2 |
| GPBP1    | 2 | ZNF501   | 2 |
| GPM6B    | 2 | ZNF502   | 2 |
| GPR12    | 2 | ZNF521   | 2 |
| GPR139   | 2 | ZNF555   | 2 |
| GPR160   | 2 | ZNF560   | 2 |
| GPR6     | 2 | ZNF576   | 2 |
| GPR68    | 2 | ZNF585A  | 2 |
| GPSM3    | 2 | ZNF595   | 2 |
| GRM2     | 2 | ZNF600   | 2 |
| GSDMA    | 2 | ZNF606   | 2 |
| GSPT2    | 2 | ZNF615   | 2 |
| GSR      | 2 | ZNF623   | 2 |
| GTF2B    | 2 | ZNF669   | 2 |
| GTF2H1   | 2 | ZNF786   | 2 |
| GTF2H3   | 2 | ZNF8     | 2 |
| GTF2H4   | 2 | ZNF839   | 2 |
| GTPBP2   | 2 | ZNF891   | 2 |
| GUCD1    | 2 | ZRANB3   | 2 |
| GUCY2D   | 2 | ZSCAN9   | 2 |
| GYPC     | 2 |          |   |
| GYS1     | 2 |          |   |
| GZMA     | 2 |          |   |
| H1FOO    | 2 |          |   |
| H1FX     | 2 |          |   |
| HAND2    | 2 |          |   |
| HAUS5    | 2 |          |   |
| Hbq1     | 2 |          |   |
| HDHD3    | 2 |          |   |
| HEATR3   | 2 |          |   |
| HEPHL1   | 2 |          |   |
| HES7     | 2 |          |   |

|          |   |
|----------|---|
| HEXIM1   | 2 |
| HGD      | 2 |
| HHIPL1   | 2 |
| HHLA2    | 2 |
| HIBCH    | 2 |
| HIF1A    | 2 |
| HIST1H1C | 2 |
| HK2      | 2 |
| HLA-DQB1 | 2 |
| HMGB3    | 2 |
| Hmgn5    | 2 |
| HMOX1    | 2 |
| HMOX2    | 2 |
| HNRNPC5  | 2 |
| HOMER1   | 2 |
| HPDL     | 2 |
| HPR      | 2 |
| HSD11B1  | 2 |
| HSD17B10 | 2 |
| HSF1     | 2 |
| HSPA12B  | 2 |
| HSPBAP1  | 2 |
| HSPBP1   | 2 |
| HTR3D    | 2 |
| HUS1     | 2 |
| HVCN1    | 2 |
| HYAL2    | 2 |
| HYAL3    | 2 |
| IBTK     | 2 |
| ICOSLG   | 2 |
| IDS      | 2 |
| IGFALS   | 2 |
| IGJ      | 2 |
| IGSF23   | 2 |
| IKZF2    | 2 |
| IKZF4    | 2 |
| IL15RA   | 2 |
| IL1B     | 2 |
| IL20     | 2 |
| IL21     | 2 |
| IL2RG    | 2 |
| IL4      | 2 |
| IMPAD1   | 2 |

|           |   |
|-----------|---|
| INADL     | 2 |
| ING1      | 2 |
| INTS1     | 2 |
| INTS10    | 2 |
| IQCF1     | 2 |
| Iqcf5     | 2 |
| IRF2BPL   | 2 |
| IRS1      | 2 |
| ISY1      | 2 |
| ITGA1     | 2 |
| IVL       | 2 |
| IZUMO3    | 2 |
| JAGN1     | 2 |
| JSRP1     | 2 |
| KCMF1     | 2 |
| KCNAB3    | 2 |
| KCNJ10    | 2 |
| KCNMB4    | 2 |
| KCTD21    | 2 |
| KDM8      | 2 |
| KIAA0319L | 2 |
| KIAA0391  | 2 |
| KIAA1024L | 2 |
| KIAA1191  | 2 |
| KIAA1429  | 2 |
| KIAA1456  | 2 |
| KIAA2013  | 2 |
| KIF13A    | 2 |
| KIF20B    | 2 |
| KIF25     | 2 |
| KIF27     | 2 |
| KIR2DL5A  | 2 |
| KISS1R    | 2 |
| KLF12     | 2 |
| KLHL13    | 2 |
| KLHL28    | 2 |
| KLHL36    | 2 |
| KLHL4     | 2 |
| KLK7      | 2 |
| KLRC1     | 2 |
| KLRF1     | 2 |
| KNG1      | 2 |
| KNSTRN    | 2 |

|            |   |
|------------|---|
| KPNA6      | 2 |
| KPRP       | 2 |
| KRT17      | 2 |
| Krt222     | 2 |
| KRT25      | 2 |
| KRT34      | 2 |
| KRT6A      | 2 |
| KRT78      | 2 |
| KRT83      | 2 |
| KRT84      | 2 |
| KRTAP12-4  | 2 |
| KRTAP5-5   | 2 |
| KT112      | 2 |
| L3MBTL2    | 2 |
| LAMA1      | 2 |
| LAMC2      | 2 |
| LAMP5      | 2 |
| LAMTOR3    | 2 |
| LCE6A      | 2 |
| LCTL       | 2 |
| LDB1       | 2 |
| LDB2       | 2 |
| LDHB       | 2 |
| LECT1      | 2 |
| LENG8      | 2 |
| LGI2       | 2 |
| LHX3       | 2 |
| LIAS       | 2 |
| LIN28B     | 2 |
| LIN54      | 2 |
| LMAN2L     | 2 |
| LMBR1      | 2 |
| LMOD3      | 2 |
| LMTK3      | 2 |
| LNK1       | 2 |
| LOC1001299 | 2 |
| LOC1001303 | 2 |
| LOC1001304 | 2 |
| LOC1001331 | 2 |
| LOC1002937 | 2 |
| LOC1005054 | 2 |
| LOC1005055 | 2 |
| LOC1005062 | 2 |



|            |   |
|------------|---|
| LOC1005069 | 2 |
| LOC1009963 | 2 |
| LOC1009963 | 2 |
| LOC1009966 | 2 |
| LOC1009966 | 2 |
| LOC1009967 | 2 |
| LOC1010603 | 2 |
| LOC1010605 | 2 |
| LOC1019275 | 2 |
| LOC1019280 | 2 |
| LOC1019290 | 2 |
| LOC1019293 | 2 |
| LOC1019297 | 2 |
| LOC1019299 | 2 |
| LOC1019299 | 2 |
| LOC1019300 | 2 |
| LOC1019300 | 2 |
| LOC1019303 | 2 |
| LOC1019305 | 2 |
| LOC1019305 | 2 |
| LOC1019306 | 2 |
| LOC391322  | 2 |
| LOC441155  | 2 |
| LOC642441  | 2 |
| LOC643802  | 2 |
| LOC646588  | 2 |
| LONP2      | 2 |
| LOXL1      | 2 |
| LPAR4      | 2 |
| LPHN1      | 2 |
| LPO        | 2 |
| LPPR2      | 2 |
| LPPR3      | 2 |
| LRP11      | 2 |
| LRRC14B    | 2 |
| LRRC23     | 2 |
| LRRC25     | 2 |
| LRRC56     | 2 |
| LRRC57     | 2 |
| LRRC70     | 2 |
| LRRC73     | 2 |
| LSM1       | 2 |
| LSS        | 2 |

|          |   |
|----------|---|
| LUZP6    | 2 |
| LYPD1    | 2 |
| LYPD5    | 2 |
| LYPLAL1  | 2 |
| LYSMD3   | 2 |
| LYZL6    | 2 |
| M1AP     | 2 |
| M6PR     | 2 |
| MAGEA1   | 2 |
| MAGEA10  | 2 |
| MAGEB18  | 2 |
| MANEA    | 2 |
| MAP2K2   | 2 |
| MAP2K4   | 2 |
| MAP2K6   | 2 |
| MAP3K6   | 2 |
| MAP4K5   | 2 |
| MAPK3    | 2 |
| MBLAC2   | 2 |
| MCAT     | 2 |
| MCOLN1   | 2 |
| MDGA1    | 2 |
| MDP1     | 2 |
| MEIS3    | 2 |
| METTTL23 | 2 |
| MEX3D    | 2 |
| MFAP5    | 2 |
| MFI2     | 2 |
| MFN1     | 2 |
| MFSD4    | 2 |
| MFSD6    | 2 |
| MIF4GD   | 2 |
| MIPEP    | 2 |
| MKRN2    | 2 |
| MLLT4    | 2 |
| MMP28    | 2 |
| MMS19    | 2 |
| MNAT1    | 2 |
| MOB2     | 2 |
| MPC1     | 2 |
| MPND     | 2 |
| MPZ      | 2 |
| MRGPRX4  | 2 |

|          |   |
|----------|---|
| MROH2A   | 2 |
| MRPL36   | 2 |
| MRPS14   | 2 |
| MRPS16   | 2 |
| MS4A4A   | 2 |
| MSC      | 2 |
| MSH3     | 2 |
| MSTO1    | 2 |
| MTA1     | 2 |
| MTDH     | 2 |
| MTNR1B   | 2 |
| MTR      | 2 |
| MTRNR2L3 | 2 |
| MTRNR2L5 | 2 |
| MTUS1    | 2 |
| MUC21    | 2 |
| MUC3B    | 2 |
| MVP      | 2 |
| MYCBP    | 2 |
| MYH6     | 2 |
| MYO16    | 2 |
| MYO5C    | 2 |
| MYO9B    | 2 |
| MYOD1    | 2 |
| N4BP1    | 2 |
| NAA25    | 2 |
| NAA35    | 2 |
| NAA60    | 2 |
| NAB2     | 2 |
| NAGPA    | 2 |
| NAMPT    | 2 |
| NAP1L5   | 2 |
| NAT2     | 2 |
| NAV3     | 2 |
| NCALD    | 2 |
| NCF1     | 2 |
| NCOA3    | 2 |
| NCSTN    | 2 |
| NDUFA5   | 2 |
| NDUFA7   | 2 |
| NECAB1   | 2 |
| NFE4     | 2 |
| NFU1     | 2 |

|         |   |
|---------|---|
| NFX1    | 2 |
| NIPAL2  | 2 |
| NKD1    | 2 |
| NKIRAS2 | 2 |
| NOL10   | 2 |
| NOS1    | 2 |
| NOS2    | 2 |
| NPAT    | 2 |
| NPBWR2  | 2 |
| NPHS2   | 2 |
| NPIPA1  | 2 |
| NPL     | 2 |
| NPM3    | 2 |
| NPSR1   | 2 |
| NPY4R   | 2 |
| NPY5R   | 2 |
| NR1I2   | 2 |
| NSD1    | 2 |
| NSMCE2  | 2 |
| NT5C1A  | 2 |
| NT5C1B  | 2 |
| NT5DC3  | 2 |
| NTN1    | 2 |
| NUDT14  | 2 |
| NWD1    | 2 |
| NXF2B   | 2 |
| NXNL1   | 2 |
| OCSTAMP | 2 |
| ODF3L1  | 2 |
| OFD1    | 2 |
| OGDHL   | 2 |
| OLFM3   | 2 |
| ONECUT3 | 2 |
| OR10J1  | 2 |
| OR14C36 | 2 |
| OR14J1  | 2 |
| OR1M1   | 2 |
| OR2A5   | 2 |
| OR2M4   | 2 |
| OR2M7   | 2 |
| OR2T29  | 2 |
| OR4D6   | 2 |
| OR4K5   | 2 |

|           |   |
|-----------|---|
| OR4M2     | 2 |
| OR51B5    | 2 |
| OR51B6    | 2 |
| OR52K2    | 2 |
| OR5A2     | 2 |
| OR6K2     | 2 |
| OR8A1     | 2 |
| OR8B3     | 2 |
| OR8G2     | 2 |
| ORMDL1    | 2 |
| OTOR      | 2 |
| OTUB1     | 2 |
| OXCT2     | 2 |
| OXSM      | 2 |
| P2RY8     | 2 |
| P4HTM     | 2 |
| Pabpc1l2b | 2 |
| PABPN1    | 2 |
| PAGE2B    | 2 |
| PAGE4     | 2 |
| PAPL      | 2 |
| PARD3     | 2 |
| PARP10    | 2 |
| PARP3     | 2 |
| PATE1     | 2 |
| PBK       | 2 |
| PBXIP1    | 2 |
| PCDH11X   | 2 |
| PCDHA8    | 2 |
| PCDHGA10  | 2 |
| PCDHGB2   | 2 |
| PCSK9     | 2 |
| PDCD1     | 2 |
| PDCL2     | 2 |
| PDE1A     | 2 |
| PDE2A     | 2 |
| PDIA2     | 2 |
| PDIA4     | 2 |
| PEAK1     | 2 |
| PELI2     | 2 |
| PFDN2     | 2 |
| PFKFB1    | 2 |
| PFKFB2    | 2 |

|                |   |
|----------------|---|
| PGAM5          | 2 |
| PGRMC2         | 2 |
| PHF14          | 2 |
| PHF2           | 2 |
| PHF20          | 2 |
| PHYHIP         | 2 |
| PI4KA          | 2 |
| PIF1           | 2 |
| PIGR           | 2 |
| PIH1D3         | 2 |
| PIK3C2A        | 2 |
| PITPNB         | 2 |
| PITPNC1        | 2 |
| PITPNM3        | 2 |
| PIWIL1         | 2 |
| PJA1           | 2 |
| PKN1           | 2 |
| PLAGL1         | 2 |
| PLCD3          | 2 |
| PLEKHS1        | 2 |
| PNLIPRP3       | 2 |
| POC1B-<br>GALN | 2 |
| POLN           | 2 |
| POLR2C         | 2 |
| POLR2G         | 2 |
| POMZP3         | 2 |
| PON1           | 2 |
| PON3           | 2 |
| POU2AF1        | 2 |
| POU2F1         | 2 |
| PPM1M          | 2 |
| PPP1R14A       | 2 |
| PPP1R27        | 2 |
| PPP1R35        | 2 |
| PPP2R1A        | 2 |
| PPP2R3C        | 2 |
| PPP2R5A        | 2 |
| PPP6R1         | 2 |
| PRADC1         | 2 |
| PRAME          | 2 |
| PRAMEF6        | 2 |
| PRDM13         | 2 |
| PRDM4          | 2 |

|         |   |
|---------|---|
| PRDM5   | 2 |
| PRIMPOL | 2 |
| PRKX    | 2 |
| PRMT2   | 2 |
| PROM2   | 2 |
| PRPF40B | 2 |
| PRR14L  | 2 |
| PRR20C  | 2 |
| PRR21   | 2 |
| PRSS50  | 2 |
| PSIP1   | 2 |
| PSPC1   | 2 |
| PTBP3   | 2 |
| PTCD1   | 2 |
| PTGES3  | 2 |
| PTGS2   | 2 |
| PTPDC1  | 2 |
| PTPN13  | 2 |
| PTPN7   | 2 |
| PTPRE   | 2 |
| PTPRZ1  | 2 |
| PVALB   | 2 |
| PVRL1   | 2 |
| PVRL2   | 2 |
| PYROXD2 | 2 |
| QPCTL   | 2 |
| QRFPR   | 2 |
| QRL1    | 2 |
| RAB17   | 2 |
| RAB27A  | 2 |
| RAB41   | 2 |
| RABGEF1 | 2 |
| RABGGTB | 2 |
| RAD23B  | 2 |
| RAD51   | 2 |
| RANBP6  | 2 |
| RANBP9  | 2 |
| RASL10A | 2 |
| RBAK    | 2 |
| RBL1    | 2 |
| RBM34   | 2 |
| RBM45   | 2 |
| RBM11J  | 2 |

|          |   |
|----------|---|
| RBP3     | 2 |
| RC3H2    | 2 |
| RCBTB2   | 2 |
| RCCD1    | 2 |
| RELN     | 2 |
| RELT     | 2 |
| REPS1    | 2 |
| RETNLB   | 2 |
| RFESD    | 2 |
| RFPL4AL1 | 2 |
| RFXANK   | 2 |
| RGL2     | 2 |
| RGR      | 2 |
| RG518    | 2 |
| RG520    | 2 |
| RHOJ     | 2 |
| RIMBP3   | 2 |
| Ripply1  | 2 |
| RLN1     | 2 |
| RMND1    | 2 |
| RNASE7   | 2 |
| RNASE8   | 2 |
| RNASEH2A | 2 |
| RND2     | 2 |
| RNF112   | 2 |
| RNF135   | 2 |
| RNF145   | 2 |
| RNF149   | 2 |
| RNF169   | 2 |
| RNF181   | 2 |
| RNF208   | 2 |
| RNF214   | 2 |
| Rnf217   | 2 |
| RNFT2    | 2 |
| RNMT     | 2 |
| RPN2     | 2 |
| RPS18    | 2 |
| RPS6KA1  | 2 |
| RPS6KB1  | 2 |
| RPTOR    | 2 |
| RRAGC    | 2 |
| RRBP1    | 2 |
| RRP15    | 2 |



|           |   |
|-----------|---|
| RRP36     | 2 |
| RSPO4     | 2 |
| RUSC1     | 2 |
| S100A10   | 2 |
| S100A2    | 2 |
| S100A7    | 2 |
| SAA2-SAA4 | 2 |
| SAMD7     | 2 |
| SAMSN1    | 2 |
| SCGN      | 2 |
| SCRN1     | 2 |
| SCYL3     | 2 |
| SDF2L1    | 2 |
| SDR16C5   | 2 |
| Sec16a    | 2 |
| SEC31B    | 2 |
| SEMA4F    | 2 |
| SEPN1     | 2 |
| SERGEF    | 2 |
| SERPINB11 | 2 |
| SERPINE3  | 2 |
| SFI1      | 2 |
| SFXN2     | 2 |
| SGOL2     | 2 |
| SGPP2     | 2 |
| SGSM1     | 2 |
| SH3BP5    | 2 |
| SH3KBP1   | 2 |
| SH3PXD2B  | 2 |
| SHB       | 2 |
| SHBG      | 2 |
| SHCBP1    | 2 |
| SHD       | 2 |
| SHE       | 2 |
| SHMT2     | 2 |
| SIAH2     | 2 |
| SIK3      | 2 |
| SIRT1     | 2 |
| SIRT7     | 2 |
| SIT1      | 2 |
| SKIL      | 2 |
| SLC10A5   | 2 |
| SLC13A5   | 2 |

|          |   |
|----------|---|
| SLC16A3  | 2 |
| SLC17A6  | 2 |
| SLC20A1  | 2 |
| SLC20A2  | 2 |
| SLC22A1  | 2 |
| SLC22A2  | 2 |
| SLC22A9  | 2 |
| SLC24A4  | 2 |
| SLC24A5  | 2 |
| SLC25A28 | 2 |
| SLC25A33 | 2 |
| SLC25A46 | 2 |
| SLC26A11 | 2 |
| SLC2A3   | 2 |
| SLC30A1  | 2 |
| SLC30A7  | 2 |
| SLC34A1  | 2 |
| SLC34A3  | 2 |
| SLC35C2  | 2 |
| SLC35D3  | 2 |
| SLC35E2  | 2 |
| SLC35G1  | 2 |
| SLC35G6  | 2 |
| SLC43A2  | 2 |
| SLC44A3  | 2 |
| SLC4A9   | 2 |
| SLC5A2   | 2 |
| SLC5A4   | 2 |
| SLC9A5   | 2 |
| SLC01B1  | 2 |
| SLC03A1  | 2 |
| SLC04C1  | 2 |
| SLC05A1  | 2 |
| SMAD7    | 2 |
| SMAP2    | 2 |
| SMARCA5  | 2 |
| SMARCD2  | 2 |
| SMCO2    | 2 |
| SMCO3    | 2 |
| SMCO4    | 2 |
| SMIM15   | 2 |
| SMIM22   | 2 |
| SNAI3    | 2 |

|                |   |
|----------------|---|
| SNX32          | 2 |
| SOCS6          | 2 |
| SOD2           | 2 |
| SOST           | 2 |
| SOX10          | 2 |
| SOX11          | 2 |
| SPACA1         | 2 |
| SPAG5          | 2 |
| SPATA16        | 2 |
| SPATA24        | 2 |
| SPATA25        | 2 |
| SPINT3         | 2 |
| SPRR2E         | 2 |
| SPRY4          | 2 |
| SPSB2          | 2 |
| SRD5A3         | 2 |
| SRI            | 2 |
| SRPR           | 2 |
| SRPX2          | 2 |
| SRSF3          | 2 |
| SRSF8          | 2 |
| SSBP2          | 2 |
| SSR1           | 2 |
| SSR2           | 2 |
| SSX2           | 2 |
| ST14           | 2 |
| ST6GALNAC<br>1 | 2 |
| ST6GALNAC<br>5 | 2 |
| STAG1          | 2 |
| STAT1          | 2 |
| STC2           | 2 |
| STIP1          | 2 |
| STK36          | 2 |
| STK4           | 2 |
| STK40          | 2 |
| STOML2         | 2 |
| STRIP2         | 2 |
| STX17          | 2 |
| SUGCT          | 2 |
| SUGP2          | 2 |
| SULT1A2        | 2 |
| SULT4A1        | 2 |
| SUN1           | 2 |

|           |   |
|-----------|---|
| SUPT20HL2 | 2 |
| SYBU      | 2 |
| SYCP1     | 2 |
| SYDE2     | 2 |
| SYF2      | 2 |
| SYN1      | 2 |
| SYNGAP1   | 2 |
| SYNJ2     | 2 |
| SYT15     | 2 |
| SYT16     | 2 |
| TAAR1     | 2 |
| TAAR9     | 2 |
| TACO1     | 2 |
| TACR2     | 2 |
| TAF12     | 2 |
| TAF1C     | 2 |
| TAF1L     | 2 |
| TAF7      | 2 |
| TANGO2    | 2 |
| TAOK1     | 2 |
| TAOK2     | 2 |
| TARBP2    | 2 |
| TAS2R19   | 2 |
| TAS2R31   | 2 |
| TAS2R41   | 2 |
| TAS2R8    | 2 |
| TBX5      | 2 |
| TCEAL6    | 2 |
| TCN1      | 2 |
| TCOF1     | 2 |
| TCP11X2   | 2 |
| Tctex1d2  | 2 |
| TDP2      | 2 |
| TDRD5     | 2 |
| TESC      | 2 |
| TESK2     | 2 |
| TEX26     | 2 |
| TFB2M     | 2 |
| TFDP3     | 2 |
| TGIF1     | 2 |
| TGM3      | 2 |
| THAP5     | 2 |
| THSD7B    | 2 |

|           |   |
|-----------|---|
| TIAF1     | 2 |
| TIFA      | 2 |
| TIMM10    | 2 |
| TIMM17A   | 2 |
| TINAG     | 2 |
| TJP1      | 2 |
| TLL2      | 2 |
| TLR5      | 2 |
| TLX2      | 2 |
| TM2D1     | 2 |
| TM4SF5    | 2 |
| TM9SF2    | 2 |
| TMC3      | 2 |
| TMEM144   | 2 |
| TMEM14A   | 2 |
| TMEM167A  | 2 |
| TMEM176A  | 2 |
| TMEM181   | 2 |
| TMEM183A  | 2 |
| TMEM200C  | 2 |
| TMEM212   | 2 |
| TMEM229A  | 2 |
| Tmem237   | 2 |
| TMEM253   | 2 |
| TMEM38B   | 2 |
| TMEM50B   | 2 |
| TMEM56    | 2 |
| TMEM67    | 2 |
| TMPRSS11E | 2 |
| TNFAIP1   | 2 |
| TNIK      | 2 |
| TNIP2     | 2 |
| TNNI2     | 2 |
| TNRC6B    | 2 |
| Tomm20l   | 2 |
| TOMM34    | 2 |
| TPPP      | 2 |
| TPTE      | 2 |
| TRAF3     | 2 |
| TRAK2     | 2 |
| TRAPPC11  | 2 |
| TRAPPC2L  | 2 |
| TRDMT1    | 2 |

|         |   |
|---------|---|
| TRDN    | 2 |
| TRIB1   | 2 |
| TRIM56  | 2 |
| TRIM63  | 2 |
| TRIML1  | 2 |
| TRIOBP  | 2 |
| TRMT10C | 2 |
| TRMT13  | 2 |
| TRMT6   | 2 |
| TRUB1   | 2 |
| TSPAN12 | 2 |
| TSPAN2  | 2 |
| TSPYL6  | 2 |
| TST     | 2 |
| TSTA3   | 2 |
| TTBK2   | 2 |
| TTC19   | 2 |
| TTF1    | 2 |
| TTLL5   | 2 |
| TUBB4B  | 2 |
| TUSC3   | 2 |
| TXNDC11 | 2 |
| TXNDC17 | 2 |
| TYR     | 2 |
| UAP1L1  | 2 |
| UBAP2   | 2 |
| UBE2A   | 2 |
| UBE2Q2L | 2 |
| UBE2V2  | 2 |
| UBE3B   | 2 |
| UBQLN3  | 2 |
| UBR7    | 2 |
| UGT1A1  | 2 |
| UGT1A9  | 2 |
| UGT2B10 | 2 |
| Unc119b | 2 |
| UPF2    | 2 |
| UPF3A   | 2 |
| UQCC1   | 2 |
| UQCRQ   | 2 |
| URAD    | 2 |
| USH1C   | 2 |
| USP12   | 2 |

|          |   |
|----------|---|
| USP14    | 2 |
| USP25    | 2 |
| USP51    | 2 |
| VIPAS39  | 2 |
| VMAC     | 2 |
| VPS36    | 2 |
| VRTN     | 2 |
| VSX2     | 2 |
| Vwa3b    | 2 |
| WDR12    | 2 |
| WDR53    | 2 |
| WDR63    | 2 |
| WDSUB1   | 2 |
| WFIKKN1  | 2 |
| WFS1     | 2 |
| WIPF3    | 2 |
| WIPI2    | 2 |
| WNT5A    | 2 |
| XCL1     | 2 |
| XKR3     | 2 |
| YEATS2   | 2 |
| YIF1A    | 2 |
| YIPF5    | 2 |
| YPEL2    | 2 |
| ZBED3    | 2 |
| ZBTB20   | 2 |
| ZBTB37   | 2 |
| ZBTB39   | 2 |
| ZBTB49   | 2 |
| ZC3H10   | 2 |
| ZCCHC3   | 2 |
| ZCCHC4   | 2 |
| ZDHC8    | 2 |
| ZKSCAN2  | 2 |
| ZMPSTE24 | 2 |
| ZNF106   | 2 |
| ZNF136   | 2 |
| ZNF185   | 2 |
| ZNF212   | 2 |
| ZNF304   | 2 |
| ZNF319   | 2 |
| ZNF324B  | 2 |
| ZNF331   | 2 |

|         |   |
|---------|---|
| ZNF33B  | 2 |
| ZNF34   | 2 |
| ZNF385B | 2 |
| ZNF410  | 2 |
| ZNF419  | 2 |
| ZNF461  | 2 |
| ZNF485  | 2 |
| ZNF502  | 2 |
| ZNF512  | 2 |
| ZNF561  | 2 |
| ZNF569  | 2 |
| ZNF576  | 2 |
| ZNF593  | 2 |
| ZNF600  | 2 |
| ZNF615  | 2 |
| ZNF654  | 2 |
| ZNF669  | 2 |
| ZNF677  | 2 |
| ZNF70   | 2 |
| ZNF71   | 2 |
| ZNF746  | 2 |
| ZNF775  | 2 |
| ZNF776  | 2 |
| ZNF780B | 2 |
| ZNF8    | 2 |
| ZNF891  | 2 |
| ZNF93   | 2 |
| ZRANB3  | 2 |
| ZSCAN30 | 2 |
| ZSCAN9  | 2 |

Supplementary Table  
S5: Overlap between  
treatments and



radiation resistance or  
sensitivity

| [resistant] and [control]: | [resistant] and [HU]: | [resistant] and [Dox]: | [resistant] and [HU + Dox]: | [sensitive] and [Control]: | [sensitive] and [HU]: | [sensitive] and [Dox]: |
|----------------------------|-----------------------|------------------------|-----------------------------|----------------------------|-----------------------|------------------------|
| SEPT1                      | ABCC4                 | SEPT1                  | SEPT1                       | AHSG                       | ACE                   | AHSG                   |
| AP2B1                      | ATP6V0E1              | AARS                   | AKT1                        | BAZ1B                      | AFP                   | AKAP13                 |
| APBB1                      | BRD2                  | ABHD13                 | ATP6V0E1                    | CAPN1                      | ASB7                  | ALOX5AP                |
| ATP2B2                     | BRSK1                 | ADIPOR1                | C1GALT1C1                   | CCR9                       | ASPH                  | ARHGAP19               |
| BAD                        | C9orf16               | AFTPH                  | C2orf42                     | CD302                      | BUB1                  | ATOH7                  |
| C3orf27                    | CASK                  | ALDH8A1                | C3orf27                     | CLCN2                      | C1orf162              | CD302                  |
| C3orf36                    | CDC25C                | ANKK1                  | CA6                         | COPS2                      | CCNC                  | CFL1                   |
| CAPN9                      | CDKL3                 | ANXA7                  | CACHD1                      | CSF1                       | CHAF1A                | CHCHD7                 |
| CBFB                       | CELSR1                | ASB18                  | CACNG7                      | DARS                       | CITED2                | CITED2                 |
| CD81                       | CXCL9                 | ASCL1                  | CAPN3                       | DGKI                       | COPS2                 | COPS2                  |
| CDK2                       | DNASE1L1              | ASS1                   | CBFB                        | EPHB6                      | DNALI1                | CSF1                   |
| CNTNAP4                    | ERBB2IP               | ATP6V0E1               | CDC42BPG                    | FIS1                       | FOS                   | CTBS                   |
| CRELD2                     | ESR2                  | BIRC6                  | DIDO1                       | GABARAPL1                  | GABARAPL1             | DGCR14                 |
| CXCL1                      | FAM65A                | BRSK1                  | ELL2                        | GEMIN8                     | GLI3                  | DGKI                   |
| CYB5D2                     | FBXO21                | C12orf50               | ERBB2IP                     | GNA12                      | ISPD                  | ELF3                   |
| CYB5R4                     | FKBP14                | C5orf22                | FBXL17                      | GRB10                      | ITPR2                 | EPRS                   |
| EPHB6                      | GLI3                  | CACNA1E                | FRMD5                       | GRK4                       | KIAA1324L             | FGF10                  |
| ESM1                       | HCFC2                 | CCRL2                  | GMNN                        | GYG1                       | MLLT3                 | FOXA3                  |
| FAM118B                    | HIF1AN                | CDC25C                 | GTF2B                       | KCNJ9                      | MX2                   | GCM2                   |
| FAM65A                     | HOMER1                | CDC42BPG               | HOMER1                      | LCE2B                      | PNOC                  | GNA12                  |
| FKBP14                     | IL3                   | CDK2                   | HSPA14                      | LITAF                      | PTPN12                | GNAI1                  |
| GALC                       | INPP5D                | CRTC2                  | IGFBP7                      | LSG1                       | PTPRZ1                | GON4L                  |
| GMNN                       | KCMF1                 | CTBP2                  | IL27RA                      | LZTS1                      | RESP18                | HIST1H2AG              |
| GOT2                       | KCNK1                 | CXCL9                  | KIAA0513                    | NCBP2                      | REST                  | HNF4G                  |
| GRIA4                      | KCTD10                | CYB561D2               | LMTK3                       | OXSR1                      | RNF7                  | HOXB4                  |
| HOMER1                     | LAMC2                 | DDO                    | MCHR1                       | PALLD                      | SFXN3                 | IPO7                   |
| KIAA0513                   | MTMR9                 | DIDO1                  | MED1                        | PGC                        | TCP11L1               | KCNMB4                 |
| KLF9                       | NFKB2                 | DNASE1L3               | MLLT4                       | PSMD12                     | TMEM9                 | KIAA1429               |
| LDLR                       | OR10Z1                | ERICH1                 | NKG7                        | RAG1                       | TOP1                  | LCE2B                  |
| LIF                        | OR4F6                 | FAM65A                 | OR11A1                      | RIPK2                      | UBE2D2                | LINGO4                 |
| LRP4                       | OR6C70                | FBXO46                 | OR2D2                       | RORA                       | WHSC1L1               | LITAF                  |

|          |         |         |           |          |      |         |
|----------|---------|---------|-----------|----------|------|---------|
| MAGEB1   | PALMD   | FLVCR1  | PIK3C2A   | SLC38A10 | WRB  | MED20   |
| MS4A6E   | PARP10  | GAS6    | POU2F3    | TMEM17   | ZEB2 | MICAL1  |
| NCR3     | PLK2    | GCM2    | PPARG     | TMOD2    |      | MTA1    |
| NDST2    | PNOC    | GMIP    | PTCH1     | TP53I11  |      | MYH13   |
| NEU1     | PXK     | GRIA4   | SHKBP1    | UBE2N    |      | NALCN   |
| NFATC2IP | RASGRP3 | GSG2    | SLC24A3   | UBE2R2   |      | NBPF3   |
| NLGN3    | RAVER1  | HADHA   | SMPDL3A   | UCHL5    |      | NHP2L1  |
| NR5A1    | RNF125  | HIF1AN  | STK38     | USP1     |      | NPHP1   |
| OR4F17   | SFXN3   | KCMF1   | TRIB1     | USP51    |      | NXPH2   |
| OR4K5    | SHOC2   | KCNN2   | TSPAN2    | ZNF554   |      | OXSRI   |
| PALMD    | SLMAP   | LDOC1L  | UHMK1     | ZNF740   |      | PABPN1  |
| PDE10A   | SMARCA2 | LMX1B   | UQCRRF1   |          |      | PLXNA2  |
| PFDN6    | SMPDL3A | MAG     | ZNF132    |          |      | PPM1M   |
| PI3      | STK38   | MAGEB1  | ZP1       |          |      | PSD3    |
| PITX1    | SYT14   | MAP3K11 | ZSCAN2    |          |      | RAD23B  |
| PLXNA1   | TRAFD1  | MLLT4   |           |          |      | RGMB    |
| POLE3    | TRIM54  | MRPL49  |           |          |      | RIPK2   |
| PPP1R12A | TRIM67  | MSH5    |           |          |      | RPS6KB1 |
| RAG1     | TTC4    | MYF6    |           |          |      | RYBP    |
| RAP1GDS1 | VAC14   | MYO9B   |           |          |      | S100A7A |
| RAPGEF5  | VCAM1   | NEUROD4 |           |          |      | SASS6   |
| RHOA     | WHSC1L1 | NFKB2   |           |          |      | SCD5    |
| RHPN1    |         | NHP2L1  |           |          |      | SEMA4G  |
| SLC12A1  |         | NKG7    |           | SEMG2    |      |         |
| SOX8     |         | OR4F17  |           | SENP8    |      |         |
| SRPK3    |         | OR4K5   |           | SLC1A1   |      |         |
| SYPL1    |         | ORAI3   |           | SLC38A8  |      |         |
| TFE3     |         | PDZD8   | STX17     |          |      |         |
| TLX2     |         | PECR    | TBC1D2    |          |      |         |
| TMEM98   |         | PIK3C2A | TGDS      |          |      |         |
| TRIB1    |         | PIWIL1  | TK2       |          |      |         |
| TRIM28   |         | PPP3CA  | TMEM183A  |          |      |         |
| TRIM54   |         | PSD3    | TMPRSS11B |          |      |         |
| TRIM60   |         | PTCH1   | TOPORS    |          |      |         |
| TRUB2    | PTPRK   | TP53I11 |           |          |      |         |

|        |
|--------|
| TSPAN2 |
| UBE3C  |
| USP1   |
| WAS    |
| WFDC8  |
| ZNF132 |
| ZNF418 |
| ZNF583 |

|                |  |
|----------------|--|
| RAPGEF5        |  |
| REV3L          |  |
| RNF125         |  |
| RPL10          |  |
| SGK2           |  |
| SLC18A2        |  |
| SLC25A28       |  |
| SLMAP          |  |
| SNURF          |  |
| SOX11          |  |
| TESK2          |  |
| THAP10         |  |
| TLX2           |  |
| TMEM189-UBE2V1 |  |
| TMPRSS4        |  |
| TNF            |  |
| TRPV4          |  |
| TSPAN2         |  |
| TYRP1          |  |
| UBE3C          |  |
| UGT1A1         |  |
| UPF2           |  |
| USP25          |  |
| XPA            |  |
| ZNF593         |  |

|         |
|---------|
| TRDMT1  |
| TRIM21  |
| TRIM56  |
| WRB     |
| ZMYND11 |
| ZNF485  |

| [resistant]<br>and [control]: | [resistant]<br>and [HU]: | [resistant]<br>and [Dox]: | [resistant]<br>and [HU +<br>Dox]: | [sensitive]<br>and [Control]: | [sensitive]<br>and [HU]: | [sensitive]<br>and [Dox]: |
|-------------------------------|--------------------------|---------------------------|-----------------------------------|-------------------------------|--------------------------|---------------------------|
| SEPT1                         | ABCC4                    | SEPT1                     | SEPT1                             | AHSG                          | ACE                      | AHSG                      |
| AP2B1                         | ATP6V0E1                 | AARS                      | AKT1                              | BAZ1B                         | AFP                      | AKAP13                    |
| APBB1                         | BRD2                     | ABHD13                    | ATP6V0E1                          | CAPN1                         | ASB7                     | ALOX5AP                   |
| ATP2B2                        | BRSK1                    | ADIPOR1                   | C1GALT1C1                         | CCR9                          | ASPH                     | ARHGAP19                  |
| BAD                           | C9orf16                  | AFTPH                     | C2orf42                           | CD302                         | BUB1                     | ATOH7                     |
| C3orf27                       | CASK                     | ALDH8A1                   | C3orf27                           | CLCN2                         | C1orf162                 | CD302                     |
| C3orf36                       | CDC25C                   | ANKK1                     | CA6                               | COPS2                         | CCNC                     | CFL1                      |
| CAPN9                         | CDKL3                    | ANXA7                     | CACHD1                            | CSF1                          | CHAF1A                   | CHCHD7                    |
| CBFB                          | CELSR1                   | ASB18                     | CACNG7                            | DARS                          | CITED2                   | CITED2                    |
| CD81                          | CXCL9                    | ASCL1                     | CAPN3                             | DGKI                          | COPS2                    | COPS2                     |
| CDK2                          | DNASE1L1                 | ASS1                      | CBFB                              | EPHB6                         | DNAL1                    | CSF1                      |
| CNTNAP4                       | ERBB2IP                  | ATP6V0E1                  | CDC42BPG                          | FIS1                          | FOS                      | CTBS                      |
| CRELD2                        | ESR2                     | BIRC6                     | DIDO1                             | GABARAPL1                     | GABARAPL1                | DGCR14                    |
| CXCL1                         | FAM65A                   | BRSK1                     | ELL2                              | GEMIN8                        | GLI3                     | DGKI                      |
| CYB5D2                        | FBXO21                   | C12orf50                  | ERBB2IP                           | GNA12                         | ISPD                     | ELF3                      |
| CYB5R4                        | FKBP14                   | C5orf22                   | FBXL17                            | GRB10                         | ITPR2                    | EPRS                      |
| EPHB6                         | GLI3                     | CACNA1E                   | FRMD5                             | GRK4                          | KIAA1324L                | FGF10                     |
| ESM1                          | HCFC2                    | CCRL2                     | GMNN                              | GYG1                          | MLLT3                    | FOXA3                     |
| FAM118B                       | HIF1AN                   | CDC25C                    | GTF2B                             | KCNJ9                         | MX2                      | GCM2                      |
| FAM65A                        | HOMER1                   | CDC42BPG                  | HOMER1                            | LCE2B                         | PNOC                     | GNA12                     |
| FKBP14                        | IL3                      | CDK2                      | HSPA14                            | LITAF                         | PTPN12                   | GNAI1                     |
| GALC                          | INPP5D                   | CRTC2                     | IGFBP7                            | LSG1                          | PTPRZ1                   | GON4L                     |
| GMNN                          | KCMF1                    | CTBP2                     | IL27RA                            | LZTS1                         | RESP18                   | HIST1H2AG                 |
| GOT2                          | KCNK1                    | CXCL9                     | KIAA0513                          | NCBP2                         | REST                     | HNF4G                     |
| GRIA4                         | KCTD10                   | CYB561D2                  | LMTK3                             | OXSRI                         | RNF7                     | HOXB4                     |
| HOMER1                        | LAMC2                    | DDO                       | MCHR1                             | PALLD                         | SFXN3                    | IPO7                      |
| KIAA0513                      | MTMR9                    | DIDO1                     | MED1                              | PGC                           | TCP11L1                  | KCNMB4                    |
| KLF9                          | NFKB2                    | DNASE1L3                  | MLLT4                             | PSMD12                        | TMEM9                    | KIAA1429                  |
| LDLR                          | OR10Z1                   | ERICH1                    | NKG7                              | RAG1                          | TOP1                     | LCE2B                     |
| LIF                           | OR4F6                    | FAM65A                    | OR11A1                            | RIPK2                         | UBE2D2                   | LINGO4                    |
| LRP4                          | OR6C70                   | FBXO46                    | OR2D2                             | RORA                          | WHSC1L1                  | LITAF                     |

|          |         |         |           |          |      |         |
|----------|---------|---------|-----------|----------|------|---------|
| MAGEB1   | PALMD   | FLVCR1  | PIK3C2A   | SLC38A10 | WRB  | MED20   |
| MS4A6E   | PARP10  | GAS6    | POU2F3    | TMEM17   | ZEB2 | MICAL1  |
| NCR3     | PLK2    | GCM2    | PPARG     | TMOD2    |      | MTA1    |
| NDST2    | PNOC    | GMIP    | PTCH1     | TP53I11  |      | MYH13   |
| NEU1     | PXK     | GRIA4   | SHKBP1    | UBE2N    |      | NALCN   |
| NFATC2IP | RASGRP3 | GSG2    | SLC24A3   | UBE2R2   |      | NBPF3   |
| NLGN3    | RAVER1  | HADHA   | SMPDL3A   | UCHL5    |      | NHP2L1  |
| NR5A1    | RNF125  | HIF1AN  | STK38     | USP1     |      | NPHP1   |
| OR4F17   | SFXN3   | KCMF1   | TRIB1     | USP51    |      | NXPH2   |
| OR4K5    | SHOC2   | KCNN2   | TSPAN2    | ZNF554   |      | OXSRI   |
| PALMD    | SLMAP   | LDOC1L  | UHMK1     | ZNF740   |      | PABPN1  |
| PDE10A   | SMARCA2 | LMX1B   | UQCRRS1   |          |      | PLXNA2  |
| PFDN6    | SMPDL3A | MAG     | ZNF132    |          |      | PPM1M   |
| PI3      | STK38   | MAGEB1  | ZP1       |          |      | PSD3    |
| PITX1    | SYT14   | MAP3K11 | ZSCAN2    |          |      | RAD23B  |
| PLXNA1   | TRAFD1  | MLLT4   |           |          |      | RGMB    |
| POLE3    | TRIM54  | MRPL49  |           |          |      | RIPK2   |
| PPP1R12A | TRIM67  | MSH5    |           |          |      | RPS6KB1 |
| RAG1     | TTC4    | MYF6    |           |          |      | RYBP    |
| RAP1GDS1 | VAC14   | MYO9B   |           | S100A7A  |      |         |
| RAPGEF5  | VCAM1   | NEUROD4 |           | SASS6    |      |         |
| RHOA     | WHSC1L1 | NFKB2   |           | SCD5     |      |         |
| RHPN1    |         | NHP2L1  |           | SEMA4G   |      |         |
| SLC12A1  |         | NKG7    |           | SEMG2    |      |         |
| SOX8     |         | OR4F17  |           | SENP8    |      |         |
| SRPK3    |         | OR4K5   |           | SLC1A1   |      |         |
| SYPL1    |         | ORAI3   |           | SLC38A8  |      |         |
| TFE3     |         | PDZD8   |           | STX17    |      |         |
| TLX2     |         | PECR    |           | TBC1D2   |      |         |
| TMEM98   |         | PIK3C2A |           | TGDS     |      |         |
| TRIB1    |         | PIWIL1  |           | TK2      |      |         |
| TRIM28   |         | PPP3CA  | TMEM183A  |          |      |         |
| TRIM54   |         | PSD3    | TMPRSS11B |          |      |         |
| TRIM60   |         | PTCH1   | TOPORS    |          |      |         |
| TRUB2    |         |         | PTPRK     | TP53I11  |      |         |

|        |
|--------|
| TSPAN2 |
| UBE3C  |
| USP1   |
| WAS    |
| WFDC8  |
| ZNF132 |
| ZNF418 |
| ZNF583 |

|                    |
|--------------------|
| RAPGEF5            |
| REV3L              |
| RNF125             |
| RPL10              |
| SGK2               |
| SLC18A2            |
| SLC25A28           |
| SLMAP              |
| SNURF              |
| SOX11              |
| TESK2              |
| THAP10             |
| TLX2               |
| TMEM189-<br>UBE2V1 |
| TMPRSS4            |
| TNF                |
| TRPV4              |
| TSPAN2             |
| TYRP1              |
| UBE3C              |
| UGT1A1             |
| UPF2               |
| USP25              |
| XPA                |
| ZNF593             |

|         |
|---------|
| TRDMT1  |
| TRIM21  |
| TRIM56  |
| WRB     |
| ZMYND11 |
| ZNF485  |

|  |
|--|
|  |
|--|

Supplementary Table S6:  
Overlaps between shRNA  
hit loci/proteins and  
proteins bound or  
depleted at nascent  
chromatin

| <b>[shRNA] and [Nascent Enriched]:</b> | <b>[shRNA] and [Nascent Depleted]:</b> | <b>[shRNA] and [Forks]:</b> | <b>[shRNA] and [Chromatin]:</b> |
|----------------------------------------|----------------------------------------|-----------------------------|---------------------------------|
| ANXA1                                  | AAAS                                   | ANXA1                       | AAAS                            |
| API5                                   | EMD                                    | ASF1B                       | EMD                             |
| ASF1B                                  | SLTM                                   | ATAD5                       | LEMD2                           |
| ATAD5                                  | SUN2                                   | BAZ1B                       | NOL10                           |
| BAZ1B                                  | PHIP                                   | BRD2                        | PRDX4                           |
| BRD2                                   | MBD1                                   | BTAF1                       | SLTM                            |
| BTAF1                                  | NOL10                                  | CDK2                        | SUN1                            |
| CBR1                                   | PRDX4                                  | CDK5                        | SUN2                            |
| CDC37                                  | SAFB2                                  | CFDP1                       | UTP23                           |
| CDK2                                   | SUN1                                   | CHD1                        | ZNF22                           |
| CDK5                                   | ZNF22                                  | CLSPN                       |                                 |
| CFDP1                                  | LEMD2                                  | CSN2                        |                                 |
| CHD1                                   | UTP23                                  | CTBP1                       |                                 |
| CLSPN                                  |                                        | CTBP2                       |                                 |
| CSN2                                   |                                        | CUL4A                       |                                 |
| CTBP1                                  |                                        | CUL5                        |                                 |
| CTBP2                                  |                                        | DHX40                       |                                 |
| CUL4A                                  |                                        | DNMT1                       |                                 |
| CUL5                                   |                                        | DUT                         |                                 |
| DHX40                                  |                                        | EHMT2                       |                                 |
| DNMT1                                  |                                        | EYA3                        |                                 |
| DUE-B                                  |                                        | FOXK1                       |                                 |
| DUT                                    |                                        | GCFC2                       |                                 |
| EHMT2                                  |                                        | HDAC2                       |                                 |
| EYA3                                   |                                        | HELLS                       |                                 |
| FOXK1                                  |                                        | HIC2                        |                                 |

|       |
|-------|
| GCFC2 |
| HDAC2 |
| HELLS |
| HIC2  |
| HMGB3 |
| IPO5  |
| IPO7  |
| JADE3 |
| KIFC1 |
| LDB1  |
| MBD3  |
| MCM10 |
| MCM2  |
| MCM5  |
| MCMBP |
| MED1  |
| MED20 |
| MMS19 |
| MORC2 |
| MSH6  |
| MTA1  |
| MTA2  |
| MTAP  |
| MTBP  |
| MUTYH |
| NACC2 |
| NAMPT |
| NR2C2 |
| NSL1  |
| NXN   |
| ORC5  |
| OTUB1 |
| PCBP2 |
| PGK1  |
| PGP   |

|       |
|-------|
| JADE3 |
| KIFC1 |
| LDB1  |
| MBD3  |
| MCM10 |
| MCM2  |
| MCM5  |
| MCMBP |
| MED1  |
| MED20 |
| MORC2 |
| MSH6  |
| MTA1  |
| MTA2  |
| MTAP  |
| MTBP  |
| MUTYH |
| NACC2 |
| NAMPT |
| NR2C2 |
| NSL1  |
| NXN   |
| ORC5  |
| OTUB1 |
| PGK1  |
| PGP   |
| PHF14 |
| PML   |
| PMM2  |
| PNKP  |
| PPIL4 |
| PPM1G |
| RAD50 |
| RAD9A |
| SCAF8 |



|       |
|-------|
| PHF14 |
| PML   |
| PMM2  |
| PNKP  |
| PPIL4 |
| PPM1G |
| PTBP1 |
| RAD50 |
| RAD9A |
| RTCB  |
| SCAF8 |
| SCML2 |
| SET   |
| SIN3A |
| SMC2  |
| SMC3  |
| STAT1 |
| TBCB  |
| THOC6 |
| TLK1  |
| TLK2  |
| TOP1  |
| TOP2A |
| TRUB1 |
| TTC4  |
| WIZ   |
| XPO5  |

|       |
|-------|
| SCML2 |
| SET   |
| SIN3A |
| SMC2  |
| SMC3  |
| STAT1 |
| TBCB  |
| THOC6 |
| TLK1  |
| TLK2  |
| TOP2A |
| WIZ   |
| XPO5  |

Supplementary Table  
S7: overlapping hits  
between three cell lines

| DF/myc(Pu/Py)58/CMV-TK | DF/myc (CTG)100/CMV-TK | [DF/myc(CTG)100eGFP/TK]<br>and [DF/myc<br>(CTG)100/CMV-TK] | [DF/myc(CTG)100eGFP/TK ]<br>and [DF/myc(Pu/Py)58/CMV-<br>TK] |
|------------------------|------------------------|------------------------------------------------------------|--------------------------------------------------------------|
| ADRB1                  | PAH                    | AAAS                                                       | ABCG2                                                        |
| DDX20                  | IRAK1                  | ACVR2B                                                     | ACTG1                                                        |
| CD2BP2                 | NDUFB7                 | AGBL1                                                      | ADAMTS19                                                     |
| CT45A4                 | LGMN                   | AGPAT9                                                     | AFF1                                                         |
| G0S2                   | PIK3C2B                | AMELY                                                      | AKTIP                                                        |
| UBE2C                  | KIR3DL1                | ANKRD13D                                                   | APOA1BP                                                      |
| SFTPB                  | ADAR                   | APOL6                                                      | ARHGDIG                                                      |
| LYPD6                  | MS4A13                 | BTF3                                                       | ARID2                                                        |
| C7orf76                | PHKG2                  | C22orf24                                                   | ARPC5L                                                       |
| BZRAP1                 | RPS27L                 | CCDC92                                                     | AURKC                                                        |
| COPS2                  | FGGY                   | CCK                                                        | BPIFB2                                                       |
| SRSF8                  | COPS2                  | CD37                                                       | C12orf45                                                     |
| TTLL4                  | IFIT1                  | CEP250                                                     | C12ORF5                                                      |
| RGS16                  | LNPEP                  | CNIH1                                                      | C1orf198                                                     |
| RMND5B                 | UBE2C                  | CRADD                                                      | C1orf229                                                     |
| SLC16A4                | SRSF8                  | DAGLB                                                      | CA3                                                          |
| HBB                    | COMMD3-BMI1            | DBH                                                        | CACNG3                                                       |
| GRID2IP                | FHAD1                  | EGFR                                                       | CALCOCO2                                                     |
| TMEM202                | NOX5                   | ETFA                                                       | CAPN9                                                        |
| CHPT1                  | TDP1                   | F8A3                                                       | Ccdc39                                                       |
| HDAC9                  | DUSP4                  | FGF13                                                      | CDR2                                                         |
| LOC101929857           | SLC40A1                | FGF18                                                      | CHIC2                                                        |
| CCDC148                | CLDN4                  | FITM1                                                      | CRAT                                                         |
| UQCRHL                 | PCDHGA2                | FNDC3A                                                     | CRTAP                                                        |
| PGPEP1L                | C7orf76                | GABBR1                                                     | DALRD3                                                       |
| PANK1                  | NEUROD4                | GIP                                                        | DBR1                                                         |
| ADAR                   | TSPAN11                | GRXCR2                                                     | DDX51                                                        |
| SHMT1                  | EFR3B                  | GYG1                                                       | DISP1                                                        |
| RBM34                  | KLF16                  | HIPK2                                                      | EPS15L1                                                      |

|           |          |              |              |
|-----------|----------|--------------|--------------|
| LDHB      | HBB      | HOMER1       | ERGIC2       |
| SSPN      | NT5E     | Hrct1        | ESM1         |
| HNRNPA1L2 | ZHX1     | HTR1D        | EVA1B        |
| CABP5     | LBX1     | IFNA1        | FAAH2        |
| ARG2      | PLET1    | IQGAP2       | FAM101B      |
| PAK4      | CARD6    | IRAK1        | FREM3        |
| MYOG      | MCOLN1   | ITGAD        | GAGE4        |
| KLK9      | PITPNB   | JADE1        | GOT2         |
| DDX27     | FA2H     | JAG2         | Gpank1       |
| ERC1      | DIS3L    | KIR3DL1      | GPATCH2L     |
| TAGLN2    | ZNF625   | KLHL6        | HK3          |
| CTBP2     | KRBA2    | LCAT         | HMGB3        |
| VCPKMT    | B4GALT4  | LCN2         | HRASLS5      |
| MTRNR2L10 | G0S2     | LOC101928268 | HSPA1A       |
| ARSA      | NCAM1    | MFI2         | IL2RB        |
| SHISA6    | TMEM221  | MMRN2        | KCNE2        |
| MS4A12    | SNRPB2   | MPO          | KIAA1045     |
| SUV39H2   | LIM2     | MROH5        | LINC00684    |
| NPM3      | CBX6     | MRPS6        | LOC100996707 |
| CSNK1A1L  | CPSF4L   | MSH6         | LOC101927989 |
| RNF167    | CNIH1    | MTCP1        | LRFN1        |
| MUC3B     | MANSC4   | MTERFD1      | LRRRC48      |
| HSF2BP    | PPP1R1B  | MTERFD2      | MACF1        |
| BFSP2     | SPATS1   | MTG2         | MAP1B        |
| SAMHD1    | AMPD1    | NDUFB5       | Ms4a15       |
| ECI2      | OTX1     | NLK          | MTRNR2L10    |
| SLCO2A1   | SLC31A1  | OCM          | MYBL1        |
| EMX1      | ORC1     | OMA1         | NADK2        |
| PC        | ERVFRD-1 | OR2C1        | NAT16        |
| KTN1      | ZNF362   | OR4F15       | NAT8B        |
| SEBOX     | NOTCH2   | OR4M2        | NEK9         |
| KCNK12    | CD8B     | OR52B6       | NELFE        |
| Cdk14     | GEMIN5   | OR5AP2       | NPM3         |
| C6ORF165  | NOL3     | OR9G1        | NPY2R        |
| UBAC2     | PAX6     | PAGE1        | NUP62CL      |

|          |              |          |          |
|----------|--------------|----------|----------|
| NMU      | TMEM30A      | PATE3    | OASL     |
| FEN1     | PRY          | PBX1     | OR4K5    |
| ANKRD13A | PTK2         | PCCB     | OR5B12   |
| CHFR     | C1S          | PCDH19   | OR6K3    |
| TM4SF18  | Mu1          | PDE10A   | OR7A10   |
| DALRD3   | RAB35        | PDLIM2   | PAK4     |
| HSPA4L   | JAG2         | PIK3C2B  | PEX11B   |
| NPY2R    | LOC100652871 | PITPNB   | PEX5L    |
| IL17RA   | NUMBL        | POLL     | PFKFB1   |
| LOXL1    | RPIA         | PRPF4    | PKLR     |
| ARID2    | SPEF2        | PSMD9    | PLA2G1B  |
| TAPT1    | GPR153       | RHPN1    | POLR3G   |
| MPP4     | HDAC9        | SH2D1B   | PPARA    |
| TMEM234  | RAB26        | SLC13A5  | PRTN3    |
| WDR91    | EXOC3        | SLC1A3   | RABL2A   |
| CACFD1   | TAF7         | SLC2A11  | RBBP5    |
| RCN2     | MET          | SMCO4    | RBM34    |
| NEURL3   | OCM          | SNAI1    | RFESD    |
| FOXS1    | Ddrgk1       | SOX8     | RHOF     |
| CACNG3   | SULT4A1      | STK17B   | RNF150   |
| NAE1     | DGKQ         | TMEM165  | RNF169   |
| AHSA1    | ACOT11       | TMEM98   | RTFDC1   |
| MEP1B    | OFD1         | TRAF3IP2 | RXRA     |
| GPR45    | FGFBP3       | TROAP    | S100B    |
| DEGS2    | KLF3         | UBE2R2   | SERPINA6 |
| C12orf73 | CISD3        | USP1     | SLAMF6   |
| PNOC     | CSPG5        | VAMP8    | SLC22A2  |
| ZNF830   | C15orf53     | VPS4B    | SLC25A53 |
| ENKD1    | HORMAD2      | WDR72    | SLTM     |
| PLEKHA6  | ST3GAL6      | ZMPSTE24 | SMIM15   |
| C15orf61 | IL10         | ZNF418   | SND1     |
| SLC2A9   | LOC101929758 | ZNF8     | SOX30    |
| DGAT1    | H2AFX        |          | SPTBN1   |
| PDCD1    | CCDC125      |          | SQLE     |
| BEX1     | CBX2         |          | SRP72    |

|              |              |
|--------------|--------------|
| PEX5L        | NR2F1        |
| SLC33A1      | NPR2         |
| Septin 5     | LRP2         |
| IL22RA1      | TTK          |
| SLC22A2      | WDR89        |
| ZNF891       | SLC16A3      |
| NME1         | FAM98A       |
| TSGA10IP     | TAGLN        |
| LGALS16      | ZSWIM8       |
| TVP23C       | EPG5         |
| METRNL       | HPN          |
| MUTYH        | PAX9         |
| OVCA2        | TNNT2        |
| IDO1         | LRRC15       |
| BDKRB2       | DNPH1        |
| KRIT1        | OR2F2        |
| TP53BP1      | IGF1R        |
| ARMC1        | CYP2C19      |
| CRYGB        | ACOT7        |
| LOC100130357 | TEFM         |
| PXDC1        | ZNF862       |
| ZNF425       | POLN         |
| FAM180B      | ASCL5        |
| TRIM49C      | SH3PXD2B     |
| C1orf168     | Tpra1        |
| OR2F2        | OSBPL6       |
| NUPR1        | ADCY8        |
| LY6G6D       | LOC100996337 |
| AHSA2        | IDI2         |
| NUDT11       | LYL1         |
| SSR4         | ZCCHC4       |
| FAM57B       | AP3S1        |
| LTB4R2       | NDEL1        |
| IRX2         | TMEM134      |
| HSPB9        | LDB2         |

|          |
|----------|
| SRPK3    |
| SSMEM1   |
| STK19    |
| TAAR9    |
| TEP1     |
| TGM3     |
| THBS2    |
| TIMM44   |
| TMEM191B |
| TMTC3    |
| TRIM28   |
| TRIM38   |
| TULP4    |
| TWF2     |
| TXNDC15  |
| UBE3C    |
| USF2     |
| WBP4     |
| ZMIZ2    |
| ZNF551   |
| ZNF555   |

|              |              |
|--------------|--------------|
| GGCT         | XYLT2        |
| SLC4A8       | KIAA1147     |
| ETFB         | ALDOB        |
| FKBP15       | PSKH1        |
| TOB1         | C3orf83      |
| NUP35        | LOC100653515 |
| MRGPRE       | SUMO1        |
| ERBB3        | OR5AN1       |
| SEMA4F       | STX4         |
| PPP6C        | VIL1         |
| KIAA1328     | ANKFY1       |
| NKX2-1       | EDNRA        |
| PKIA         | NDUFB5       |
| ACOT12       | PGM2         |
| LENG9        | HGFAC        |
| FAM135A      | MOGS         |
| PHOX2A       | PRKAR1B      |
| KAT2B        | F8A3         |
| RPL8         | SLC18B1      |
| ZC3HAV1      | MED26        |
| NUTF2        | SGIP1        |
| KIAA1191     | PDZRN3       |
| SPARC        | NFIC         |
| NOTCH4       | VN1R4        |
| ERCC4        | HIST2H4B     |
| LOC101060236 | Ankrd36      |
| RTFDC1       | ZC3H12B      |
| SPOCK1       | OR8H3        |
| CARF         | OSBPL10      |
| CATSPER2     | ANXA4        |
| ABCA13       | CUL7         |
| Hbq1         | CCNDBP1      |
| GPALPP1      | OR2L2        |
| CXorf40A     | LUZP1        |
| Rgs11        | TROAP        |

|              |          |
|--------------|----------|
| C1GALT1      | ETFA     |
| ACTL8        | PPP1R14A |
| IGSF9B       | BNIP1    |
| ICOSLG       | ASB2     |
| LYPD1        | SLC41A3  |
| PCYOX1       | OR5AP2   |
| ZNF441       | S100A2   |
| LRRC14       | SLC35F4  |
| BTC          | POLL     |
| PPIAL4D      | ULBP1    |
| KLHL3        | PBX4     |
| LOC100292952 | LEP      |
| ATG4D        | RBMS3    |
| SDHA         | GALK1    |
| AKAP5        | ARL6IP6  |
| WBP4         | PDE10A   |
| HMGB3        | SPAG9    |
| NSUN3        | CT47A8   |
| SOX30        | SNIP1    |
| NAT9         | OR10Z1   |
| IDI2         | KCNK13   |
| TAOK2        | SEC14L1  |
| SEMA6D       | NDUFA5   |
| KAZALD1      | TM9SF1   |
| IQGAP1       | MRPL23   |
| FEM1B        | FGF13    |
| CIITA        | ULK2     |
| RAB2B        | CDPF1    |
| FKBP1A       | LSM3     |
| ANKRD46      | KRBOX1   |
| HAPLN3       | CHRNA2   |
| FUK          | PSAP     |
| TEX13A       | TEX13A   |
| KRTAP13-1    | JADE1    |
| NAMPT        | ODF3     |

|              |              |
|--------------|--------------|
| MAN2A2       | MRGPRF       |
| FAM118A      | FAM135A      |
| CNOT4        | CRADD        |
| ACAT1        | ZNF837       |
| FUS          | NNT          |
| EPCAM        | NFRKB        |
| KRT78        | HNRNPA1L2    |
| UPF1         | CASP5        |
| LRRC24       | KCNV1        |
| DGKG         | VANGL1       |
| PQLC1        | TRIM64       |
| Tada2b       | SLC39A14     |
| CEACAM16     | PLP2         |
| PTPRQ        | PADI6        |
| GTSCR1       | TMCC1        |
| TMEM251      | NDP          |
| BAGE4        | POLR2F       |
| KLHDC7A      | UGT3A2       |
| RNF186       | PCDHB1       |
| OR4F5        | TNP2         |
| SLC24A3      | TRAPPC1      |
| LOC101927403 | TOM1         |
| ATP6AP1L     | LOC101928268 |
| MTMR2        | RSPO4        |
| RGS10        | PBX1         |
| IL2RB        | CCDC67       |
| EIF4EBP2     | GALNT18      |
| CCDC180      | LOC101928728 |
| TMEM92       | ARHGDIB      |
| CPA6         | SERPINB4     |
| GPR82        | KIAA1328     |
| EMC3         | SLC2A7       |
| PDXP         | OR4D6        |
| LIG3         | GSDMA        |
| MEF2D        | TMEM74       |



|              |              |
|--------------|--------------|
| PAQR9        | LOC100130357 |
| SLC22A8      | C20orf196    |
| OR8D1        | TOP2A        |
| PIWIL3       | DDX25        |
| FOLH1        | SOX6         |
| NSA2         | ANKRD13B     |
| TCEAL7       | CCNC         |
| CRYGD        | GHSR         |
| CNEP1R1      | DDX18        |
| SELPLG       | MED19        |
| TICAM2       | ZNRF3        |
| EXO1         | GLRA1        |
| ELK3         | PCDHB16      |
| NPRL3        | TALDO1       |
| RNASEK       | SYNGR2       |
| WISP3        | FOXP3        |
| CELF1        | C3orf22      |
| Jkamp        | CDS2         |
| ABCC12       | FAM173A      |
| RPL41        | PLEKHO1      |
| UBAP1        | ZNF157       |
| LOC100507462 | PEX3         |
| PDAP1        | C10ORF67     |
| NUTM2B       | ARL2         |
| POU2F3       | GABBR1       |
| PRTN3        | MUC15        |
| GNL1         | TIMELESS     |
| FBXO6        | ALKBH8       |
| TALDO1       | IL17RD       |
| PICK1        | C12orf56     |
| HS3ST2       | FOLH1        |
| RBAK-RBAKDN  | VGLL1        |
| DDX18        | COL1A1       |
| PCDHB12      | SEMA6D       |
| PFN3         | Pirt         |

|           |              |
|-----------|--------------|
| KCNJ3     | KDM5B        |
| HERC5     | TMEM62       |
| PFKM      | OR51I1       |
| SLC22A17  | LOC101929490 |
| CYP4F12   | NACA2        |
| MB        | ZMPSTE24     |
| SIGLEC1   | UBN2         |
| C10ORF128 | PIF1         |
| IKZF4     | ZNF418       |
| SSR1      | MKL1         |
| BEST1     | SIGLEC11     |
| ANKRD2    | CCDC180      |
| CDH15     | CDKL1        |
| CD5L      | MAPK1        |
| SPINT1    | SMIM2        |
| RGPD6     | CAST         |
| DEFA3     | NT5DC3       |
| FLOT2     | EXOC3L1      |
| OGN       | DDX11        |
| RAX       | SHROOM4      |
| PXK       | STK17B       |
| STXBP2    | MTCP1        |
| DKK1      | EREG         |
| IMPAD1    | C9orf173     |
| SESN1     | AZU1         |
| ZNF567    | OMA1         |
| PEX11B    | SLC51A       |
| Kdm4a     | DCHS1        |
| NGLY1     | SLC34A2      |
| PEX3      | OAZ3         |
| TSTD1     | DGKK         |
| NAT8B     | CEACAM16     |
| SLC30A2   | VSNL1        |
| EBP       | MRPS6        |
| GTF3A     | CTNND1       |

|              |              |
|--------------|--------------|
| LPPR5        | ZNF101       |
| RPP38        | MORC2        |
| CCR9         | TRIM27       |
| LMO2         | CIART        |
| CMTM2        | ZNF665       |
| CAPN9        | DEFB127      |
| APPL2        | MYO1H        |
| KIAA1244     | ZNF573       |
| SPAG6        | BANF2        |
| SMIM22       | LOC101928120 |
| C11orf21     | ANKRD13D     |
| SLC28A1      | OGT          |
| HMBS         | FBXO15       |
| LOC101930073 | UST          |
| SENP3        | FAM161B      |
| TMEM218      | TM7SF2       |
| KLF7         | HAS2         |
| KIF18B       | MAGEC1       |
| PIK3IP1      | AGAP7        |
| ASAH2B       | LLGL1        |
| ZSCAN18      | BLMH         |
| ZCWPW2       | WDSUB1       |
| TMEM55B      | NPR1         |
| PXMP2        | SLC25A29     |
| ZNF136       | TASP1        |
| KCNH6        | C3orf84      |
| NANP         | CALD1        |
| OSTCP2       | FAM213B      |
| CHST10       | AFP          |
| NOTCH2       | MAGEA3       |
| RASGEF1A     | ZNF112       |
| DMXL2        | ASGR2        |
| PFKFB1       | HSD11B2      |
| CD59         | GPR65        |
| C4orf45      | LHCGR        |

|              |           |
|--------------|-----------|
| RASGRP1      | SAMD4B    |
| IL1RAP       | RPS8      |
| TTLL12       | HSPA12A   |
| EEF1A1       | LCK       |
| TNFSF15      | HS3ST6    |
| PTGES3       | WNT3      |
| GPR160       | STAT1     |
| TMEM183B     | PAXIP1    |
| PPP1R3C      | ANKRD42   |
| LOC101930154 | HPRT1     |
| PTX3         | KIF15     |
| SPATA19      | DNAJB1    |
| IGF2         | ZNF844    |
| ARHGDIG      | ZNF350    |
| ZNF142       | KLHL36    |
| TYW1B        | HMGCLL1   |
| RFPL1        | CAPN3     |
| PTGDS        | TGFB111   |
| HECTD2       | WBP1L     |
| OR8J3        | BMP4      |
| ARHGAP4      | OR4A16    |
| TMEM253      | UBE2U     |
| KDEL2        | TMPRSS11A |
| RABL2A       | P2RY2     |
| MXI1         | CTC1      |
| DCBLD2       | COX16     |
| ANGPTL6      | TCL1A     |
| SLCO4C1      | FBXL17    |
| LOC101930295 | APOL6     |
| NPIPA7       | PDP2      |
| DUSP11       | CD44      |
| TRAPPC5      | CA7       |
| ACOX3        | ZNF236    |
| UVRAG        | HTR1D     |
| CHD9         | BAGE2     |

|           |              |
|-----------|--------------|
| LCT       | RNASE10      |
| ELK4      | HSPB2        |
| ARC       | AARSD1       |
| RPS6KA2   | MUC8         |
| PAPPA2    | PRKAB1       |
| SERPINC1  | ZNF595       |
| ABCD2     | WNK2         |
| WNK2      | PFKFB3       |
| Uba5      | Manf         |
| NBN       | STON1        |
| SULF2     | NALCN        |
| MFAP5     | PAX4         |
| SLIT2     | NTMT1        |
| MGAT5B    | GFPT1        |
| TMEM59L   | CD97         |
| PPP1R3E   | FNDC3A       |
| BIRC8     | XRRA1        |
| LOC339862 | IL22RA1      |
| SLC35D2   | COIL         |
| POU3F3    | IGF2BP3      |
| SGCD      | PALB2        |
| TXNDC9    | TSSK4        |
| TRIM64C   | ACAN         |
| PRELP     | NEURL1B      |
| TMEM163   | FAM53C       |
| Rnls      | C19orf33     |
| SLC22A11  | GALNT3       |
| IRGC      | LOC101930279 |
| RND2      | TDP2         |
| NLGN4X    | LOC100506374 |
| RABGEF1   | TLX1NB       |
| XRRA1     | ITGAD        |
| TMEM51    | EIF4G2       |
| OXLD1     | ASCC3        |
| ZNF823    | LXN          |

|             |          |
|-------------|----------|
| SLC15A4     | NOTCH1   |
| RXRA        | RCN2     |
| GRPEL2      | LRRC49   |
| HSBP1       | IL1RN    |
| NR1D1       | AKNA     |
| SLC19A2     | Uba5     |
| ALPL        | OR10J5   |
| CHD8        | RAP1GDS1 |
| FASTKD5     | MTFR1L   |
| NEDD4       | IFITM10  |
| RNASE8      | AMPD2    |
| TFF2        | PDGFC    |
| SAMD14      | OR51A7   |
| MAT2B       | HRNR     |
| PNMA6A      | LHFPL5   |
| AQP1        | B4GALNT2 |
| MID1        | RUNDC3B  |
| MLX         | CD8A     |
| MAP3K9      | SLC1A3   |
| GCN1L1      | VAMP8    |
| ATOX1       | KIAA1958 |
| IQCJ-SCHIP1 | EEF1A1   |
| ANP32E      | VCPIP1   |
| CXCR4       | COL27A1  |
| KRT84       | CST2     |
| FBXO42      | PXDN     |
| FAM83A      | DPT      |
| FAM76A      | FGF14    |
| CA3         | MPHOSPH9 |
| OLFM4       | PRR20D   |
| EQTN        | CHUK     |
| TAT         | PNLIPRP1 |
| HIST3H3     | ENOPH1   |
| DNMT1       | ADI1     |
| SLAMF6      | PRKACB   |

|              |                |
|--------------|----------------|
| CNTF         | FAM102B        |
| USP38        | FXN            |
| POLB         | CACNG8         |
| ZNF774       | CIITA          |
| SFRP5        | TACR1          |
| FAM46B       | CA8            |
| RAB30        | IFNG           |
| CAPNS1       | VPS33B         |
| FBXO28       | FICD           |
| PCK2         | C12orf60       |
| SCN1B        | MRPL50         |
| RNF113B      | CHN1           |
| TMEM170A     | ACR            |
| RHOT2        | CERK           |
| POPDC2       | Prr24          |
| PRKAR2A      | JAGN1          |
| ZNF720       | PCNXL2         |
| ADAM33       | PCDHGA4        |
| HMGCLL1      | TNKS2          |
| CCL8         | POC1B          |
| TNFRSF21     | FPGS           |
| CLDN3        | NLK            |
| FAM175B      | MAFB           |
| HSP90AB1     | TG             |
| LACC1        | C7orf55-LUC7L2 |
| XYLT1        | SEMA4D         |
| HHIPL2       | KIAA1244       |
| MICU3        | CCDC142        |
| ICA1         | MCF2           |
| LOC101928548 | OR7A17         |
| FAM170B      | SRPK2          |
| SPATA4       | RS1            |
| Ak4          | NDFIP2         |
| LOC100505478 | ZNF189         |
| CELA2B       | GEMIN7         |

|              |           |
|--------------|-----------|
| ENO2         | DEDD2     |
| PGLYRP4      | DUOX1     |
| FAM110D      | RBBP4     |
| SHC4         | FUT8      |
| SFT2D1       | LAS1L     |
| TAF3         | PPP3R1    |
| MYO1D        | GSG2      |
| ANAPC10      | KLRG2     |
| CLC          | ZFAND2A   |
| GLRA4        | OR52N5    |
| TEX12        | CCDC58    |
| C8orf33      | TBCEL     |
| SHOC2        | NOL4L     |
| CLIC5        | FAM111A   |
| LCN9         | GABRB3    |
| C3orf30      | PEX13     |
| Tet3         | IL18      |
| TTC4         | GOLGA6L1  |
| PTPN1        | OR5M3     |
| KLF10        | CFH       |
| TRIM61       | PSMB5     |
| TM7SF2       | GNG7      |
| ZNF674       | RAP1A     |
| USF2         | LCN10     |
| CDR2         | ERP29     |
| KRTAP12-4    | MFRP      |
| CASP5        | LAMA4     |
| ATP5G1       | NPEPL1    |
| LMNA         | ASB12     |
| NFE2L3       | SNRPB     |
| EPO          | NPIPA7    |
| LOC100293211 | ITGAE     |
| RNF169       | SCN1B     |
| MAS1L        | SMAD6     |
| C7orf62      | LOC730183 |



|           |              |
|-----------|--------------|
| AMPD2     | SLC25A21     |
| ADAMTS19  | CACNG6       |
| CLPB      | PMVK         |
| NR0B1     | WISP2        |
| LOC401052 | UBE2R2       |
| LCN15     | CTSW         |
| MRPL43    | PCDHB3       |
| PRRC2A    | DNM1L        |
| ZNF283    | CCDC179      |
| ABHD17C   | PLCG2        |
| DNASE1L3  | CXCR4        |
| PSMB5     | IL10RB       |
| CCDC108   | PEAK1        |
| GALK1     | C19ORF26     |
| TMEM121   | RAB33B       |
| ANKHD1    | PDIA6        |
| Plac9     | COPG2        |
| CMTM8     | COX4I1       |
| KDM5C     | SOS1         |
| MFSD9     | WWP1         |
| PTGDR     | FITM1        |
| POLR2J2   | HMGB1        |
| HAO2      | ERVV-1       |
| PCDHGB2   | FBXO28       |
| OR10J5    | MCAT         |
| RSPO2     | PRR16        |
| NLRP12    | TAS2R38      |
| OR14C36   | TFCP2        |
| RPTOR     | KIF21A       |
| SMUG1     | HOMER1       |
| PRKD1     | Srsf6        |
| FAM71F2   | MCF2L        |
| STEAP4    | LOC100996721 |
| BAG1      | ASB11        |
| CYP4A22   | KIAA0141     |

|                |           |
|----------------|-----------|
| SUSD2          | LRCOL1    |
| CASP6          | PRTG      |
| PLA2G4C        | CUL4A     |
| C10ORF129      | DLG4      |
| WNT4           | ZNF274    |
| SLC25A53       | AVL9      |
| SCRT1          | CD74      |
| NOS3           | TM4SF19   |
| LHFPL5         | KHDRBS3   |
| CCL7           | MYC       |
| Ms4a15         | PCDH19    |
| ZMIZ2          | POTEF     |
| FAM101B        | CYP46A1   |
| ARIH2          | CD48      |
| MALT1          | CEP68     |
| RAB26          | LOC554223 |
| MFRP           | SFXN1     |
| SIM1           | RPL36A    |
| NCF2           | RAB30     |
| CRYAB          | ZNF90     |
| ZNF341         | PLAG1     |
| VGLL3          | MPP4      |
| PMP2           | NIFK      |
| ITPKC          | TM6SF2    |
| GTF2H2C        | NDC80     |
| GPR89A         | C7ORF33   |
| CELA3B         | OLFML2A   |
| CEACAM20       | DBF4B     |
| ZNF793         | MYH15     |
| CGNL1          | VSTM1     |
| Sap25          | LYZL1     |
| CCDC68         | CFI       |
| MSANTD3-TMEFF1 | CCDC51    |
| NEBL           | PLAC1     |
| TOP3B          | FDX1      |

|              |          |
|--------------|----------|
| BTN2A1       | DOCK8    |
| ZNF461       | CREG2    |
| ATG7         | ARL13B   |
| RPS10-NUDT3  | LCE3E    |
| SIN3A        | KLHDC10  |
| ATP6V0E1     | SPTBN2   |
| SND1         | MTERFD1  |
| EVI5         | GLI1     |
| ZZEF1        | SEMA4G   |
| COL23A1      | TRAF3IP2 |
| LRP5L        | SPINK5   |
| RLBP1        | PRAMEF4  |
| PDZD8        | IMPAD1   |
| PRICKLE3     | KAL1     |
| RSPH1        | FGF20    |
| PLD4         | AXIN2    |
| Dnah12       | KLF12    |
| AMY1C        | POM121L2 |
| TIMM44       | CEACAM20 |
| RNF152       | COG8     |
| LOC101927029 | FCGR3B   |
| CEP104       | ATP5G1   |
| MBD2         | Minos1   |
| ATCAY        | JADE2    |
| FBP1         | SOD2     |
| ZRANB3       | SBK3     |
| CLUAP1       | ACBD6    |
| KIAA0930     | SH2D1B   |
| SIX3         | EIF5     |
| DLGAP2       | C6orf99  |
| NCKAP5       | AQPEP    |
| CCL22        | PLEKHH3  |
| EID1         | KRT13    |
| TAAR9        | GJA10    |
| OR13C2       | PSMD9    |

|           |           |
|-----------|-----------|
| FAM122B   | MMRN2     |
| ZC3HC1    | PLA2G12A  |
| LOC149373 | GNLY      |
| SOX3      | AGPS      |
| S100B     | KRT39     |
| GPATCH1   | LIPJ      |
| FNTA      | CGNL1     |
| GCAT      | LOC732265 |
| C14ORF105 | AKAP10    |
| LRFN1     | CPEB3     |
| SMIM7     | LRRN4CL   |
| POU4F3    | FOXD4L3   |
| TEX101    | ENPP4     |
| NAV1      | CTAGE4    |
| ZNF331    | RPS20     |
| OR5H14    | SIRPA     |
| ATXN3L    | SLC2A11   |
| SHKBP1    | BRE       |
| RFTN2     | AKR1B1    |
| ZDHHC6    | EFHD2     |
| TRIM48    | CWF19L2   |
| RPLP0     | PHLDB2    |
| LMO4      | KIAA1751  |
| KCNJ2     | OR6C74    |
| PEX5      | STARD10   |
| ADCK4     | RTN4RL2   |
| CDS1      | PDE6H     |
| ZDHHC23   | ZNF439    |
| ODF3      | FAM214B   |
| PGP       | GSTK1     |
| PRDX4     | SLC6A3    |
| MAP1B     | CCR10     |
| TGM3      | TBC1D7    |
| FILIP1    | RASL10A   |
| CETN3     | TXK       |

|              |              |
|--------------|--------------|
| CTSC         | USP10        |
| MFSD5        | LOC101930586 |
| ZRANB1       | GPA33        |
| RPS19        | GNPAT        |
| PPP1R8       | ERN1         |
| ACAA1        | CHST13       |
| TMPRSS11B    | PAXBP1       |
| RFPL3        | CMC2         |
| ERCC6-PGBD3  | MSH6         |
| RHCE         | REPIN1       |
| SNAPC2       | ASTL         |
| MYH4         | INSIG1       |
| SETD5        | TRIM39       |
| OR4K5        | CRYM         |
| SGCG         | TTC23        |
| NDEL1        | SLC25A22     |
| GOT2         | LRFN5        |
| SLC7A10      | C20ORF24     |
| FAM83F       | CLU          |
| TLX1NB       | GIP          |
| ASGR1        | FAM153B      |
| TFF3         | MTERFD2      |
| HBP1         | PDE7B        |
| MRPL55       | PPP4R1       |
| C6ORF118     | HS3ST1       |
| SLC15A2      | MTG2         |
| GPR37        | CD33         |
| STK32A       | TOR1AIP1     |
| MED23        | HTATIP2      |
| LIPJ         | OR4D10       |
| PELI3        | DNAL4        |
| EGFL6        | MS4A7        |
| LOC101929972 | AGPAT9       |
| TMTC3        | FAM188A      |
| EIF3H        | ZCCHC11      |

|            |            |
|------------|------------|
| OR4C16     | ARPP19     |
| C17orf77   | PCCB       |
| SVOPL      | CLEC12B    |
| C14ORF79   | PXT1       |
| ADAM9      | ZNF480     |
| PHRF1      | SAMD12     |
| CSGALNACT2 | LNK2       |
| GPI        | CTSS       |
| CERS3      | FBXO10     |
| SERBP1     | KCNA6      |
| UGT1A9     | TM9SF4     |
| KIAA1045   | CMKLR1     |
| TM9SF1     | MFSD2B     |
| ASL        | CTCFL      |
| PDZD3      | MS4A14     |
| GZMA       | PCGF6      |
| Sgk1       | TMEM253    |
| AKAP10     | TOB2       |
| CARD9      | VGLL3      |
| KIRREL3    | FBXW8      |
| PHF20      | ZNF180     |
| OR6N2      | CCDC22     |
| NEDD4L     | PLEKHA4    |
| DSCR3      | PLBD2      |
| POLR3E     | MPC1L      |
| C2orf27B   | AADA4L     |
| ATP5C1     | KRTAP10-11 |
| TUBD1      | PCID2      |
| GPHA2      | MEF2B      |
| Tmx2       | LCAT       |
| C21ORF2    | THUMPD1    |
| MAGI2      | TRPC4      |
| C1orf115   | RAP1B      |
| CENPQ      | NAT2       |
| MAML1      | TBCC       |

|              |              |
|--------------|--------------|
| OR5C1        | AMER3        |
| ADCYAP1      | RBL1         |
| Vsig10       | PELP1        |
| CARD17       | ZAR1L        |
| CALCOCO2     | ZBTB7B       |
| ARPC5L       | PCP4         |
| SERPINA6     | LAP3         |
| ZNF589       | RUSC2        |
| TESK1        | COL9A1       |
| APOBEC3H     | S100A4       |
| SH3TC1       | AMY2A        |
| MEGF8        | LOC100506859 |
| GINM1        | DHRS7        |
| NCL          | IRX1         |
| CRYZ         | MMAB         |
| NFKBIE       | RABEP1       |
| RNF168       | LGALS3       |
| H2AFY2       | FBXO22       |
| COASY        | TECTA        |
| ZNF398       | CLCN6        |
| MANBA        | CCK          |
| FTH1         | YIPF6        |
| RFESD        | EGF          |
| MYOZ1        | C3orf35      |
| COX14        | CCNT2        |
| MMS22L       | MX2          |
| SLC7A4       | GP1BA        |
| MRPL36       | MYO3B        |
| SOX12        | POLR3K       |
| TRPA1        | CRISP1       |
| SLC2A5       | Ubxn7        |
| AKTIP        | IL1R2        |
| LOC100996415 | CLVS1        |
| C1orf101     | SLC35A3      |
| CREBZF       | CCDC6        |

|              |                 |
|--------------|-----------------|
| CBX8         | MAP3K13         |
| C19orf52     | SPG7            |
| GAMT         | NR3C2           |
| TCP10L2      | IL31            |
| B2M          | LRRK1           |
| DCLRE1C      | ARFGEF2         |
| CHIC2        | TBC1D27         |
| GATAD2B      | TELO2           |
| OR3A3        | SGCA            |
| USP16        | SMCO4           |
| FMO3         | NSMF            |
| Clvs2        | TCERG1          |
| ST8SIA6      | TBC1D20         |
| NOS1AP       | RABIF           |
| GAR1         | CBR4            |
| OR10K1       | DPY19L2         |
| HIST1H2BK    | CCDC23          |
| CSTB         | TNFSF12-TNFSF13 |
| WDR52        | NME4            |
| OR5V1        | LHX1            |
| FBXL16       | OR4M2           |
| EXOSC1       | ADAT1           |
| ARNT         | FGG             |
| SKA1         | PITRM1          |
| LOC101929220 | KLK4            |
| PACRG        | SPECC1          |
| ADPRH        | ASIC5           |
| MTX1         | ZNF888          |
| MRPL45       | DHX16           |
| PCNXL2       | FGF18           |
| KRTAP4-11    | YPEL3           |
| FER1L6       | MPP2            |
| ADM5         | VSTM2A          |
| LIPC         | PATE3           |
| OR6M1        | HOXB3           |



|          |           |
|----------|-----------|
| TMEM168  | KCNJ15    |
| WAPAL    | H2AFY     |
| SCARB2   | GDF9      |
| ZEB1     | GTF3C6    |
| SLC31A2  | ACVR1     |
| FJX1     | OR4C16    |
| EVA1B    | ADRBK2    |
| DMRTC2   | PPP2R1B   |
| CCL3L1   | PLCD3     |
| TERF2IP  | RBPJ      |
| DYNC1LI1 | SLC22A15  |
| MTMR9    | RPSA      |
| DOLPP1   | TCL1B     |
| KCNE2    | TGFB2     |
| PREP     | STK32B    |
| C2orf42  | TNNC1     |
| FAS      | MRGPRE    |
| AGAP5    | OR52B6    |
| CRABP1   | LPAR4     |
| PLA2G12A | KRTAP29-1 |
| GUCY2D   | AMHR2     |
| GSTA2    | MARC1     |
| USP21    | NCKAP5    |
| SIN3B    | SLC45A4   |
| GPR162   | HBEGF     |
| DUSP18   | ATG14     |
| MIER2    | OR4F15    |
| SLC6A17  | PAGE1     |
| FRMPD1   | LMNA      |
| TOMM22   | EIF3H     |
| SMIM15   | MCF2L2    |
| MAPT     | OR9G1     |
| GNAL     | DRG1      |
| SP6      | TMEM205   |
| ERCC1    | GOT1L1    |

|              |              |
|--------------|--------------|
| CMAS         | NUDT16       |
| KAT5         | HLA-DQA1     |
| NLRX1        | FAM166B      |
| CCL18        | TGM6         |
| VAMP4        | Septin15     |
| TRIB3        | FNDC4        |
| BPIFB1       | CHTF18       |
| MTMR7        | GMPR2        |
| PHF10        | Cisd2        |
| OR51Q1       | PGM3         |
| LOC101930432 | RNF149       |
| KCNC2        | SEC14L2      |
| RIMKLA       | TMEM165      |
| RAVER1       | C10ORF129    |
| APOOL        | TMPRSS6      |
| HPS5         | CD3E         |
| TAS1R1       | FAM110D      |
| MTA2         | NUAK1        |
| PLEKHN1      | UBE2M        |
| CLDN2        | STAB1        |
| CKS2         | AGPAT6       |
| ZNF527       | RGR          |
| CELA2A       | CCDC154      |
| IZUMO4       | ACAT1        |
| PELP1        | FGF7         |
| KLF4         | PROKR1       |
| RARS         | LOC101929519 |
| LCN8         | ZDHHC5       |
| LOC100996707 | TXNDC9       |
| BSPH1        | ITLN1        |
| HSPA1A       | AK6          |
| DNAH11       | LOC101929857 |
| ENTPD8       | AMICA1       |
| DEXI         | NDOR1        |
| ADAM11       | C11orf68     |

|           |              |
|-----------|--------------|
| PRIM1     | NKPD1        |
| TAF15     | ASB4         |
| GTF2E2    | MSX1         |
| RAP1GDS1  | TMCC3        |
| ITIH6     | SCIN         |
| FCGR1B    | RRNAD1       |
| LPAR6     | ADAM20       |
| CADM4     | CYP27B1      |
| MTIF2     | NOTCH4       |
| LOC390937 | ZNF408       |
| TAF1      | OR56A4       |
| BPIFB2    | IRF9         |
| CDCP2     | ZFAND4       |
| ATF7      | RDH16        |
| Atat1     | SLC2A14      |
| NAT16     | IRGM         |
| BTAF1     | TRIM61       |
| KRTAP12-3 | SLC11A1      |
| SPAG1     | C14orf182    |
| CRTAC1    | CIDEA        |
| INHBE     | ENTPD1       |
| CNTD2     | ZNF341       |
| SLC35A1   | PNPLA8       |
| PCBP3     | LRRC4B       |
| TNFSF18   | OR2A7        |
| ARL6IP6   | SUDS3        |
| ZSCAN1    | TH           |
| ZKSCAN4   | WNT9B        |
| SKIDA1    | LOC101929876 |
| GLYATL1   | THUMPD3      |
| TP53I3    | BOLL         |
| SPACA1    | FZR1         |
| NIFK      | OR1L6        |
| THBS2     | SFRP4        |
| PSMB8     | FOXF1        |

|              |              |
|--------------|--------------|
| LOC388282    | ZNF441       |
| TRMU         | CCDC126      |
| CAPS         | DNAAF1       |
| TMEM180      | LRP12        |
| CCDC27       | C1orf177     |
| CLU          | PCDHB12      |
| ERGIC2       | FAM65C       |
| NTNG2        | RNF17        |
| KBTBD8       | ALX1         |
| OR6B3        | USF1         |
| LOC101929989 | PDLIM2       |
| CHEK2        | ENOX2        |
| PARPBP       | ARL10        |
| CTSA         | WDR5B        |
| LOC101929393 | SLC13A5      |
| ATXN2L       | CYP17A1      |
| SAYSD1       | SH3GL2       |
| GFRA4        | RRAD         |
| KLRG1        | CDH4         |
| PEX13        | KRAS         |
| RCC1         | C12orf61     |
| RGL4         | OR2A2        |
| LOC101929766 | PCTP         |
| ZNF860       | MTA3         |
| ATP10B       | ZNF704       |
| NUP62CL      | TNC          |
| ZNF721       | MCUR1        |
| SRP72        | HLA-DRB5     |
| OR4D10       | SLC35B2      |
| TCN1         | LOC101927850 |
| SLC7A9       | C3orf58      |
| PFKFB4       | B3GNT8       |
| ZNF671       | HEPN1        |
| COMT         | RASAL2       |
| LRP2BP       | LGALS8       |

|          |               |
|----------|---------------|
| FBXL18   | HIRA          |
| AMOT     | GOLGA7        |
| KCNA5    | ZXDC          |
| MAPK8    | VWA5A         |
| FANCD2OS | AAAS          |
| ITGB1BP1 | CHORDC1       |
| SHROOM3  | DAPP1         |
| BRD4     | KLHL6         |
| GOLGA8B  | GCNT4         |
| DNAH8    | CD207         |
| ZBTB18   | MEF2BNB-MEF2B |
| BAIAP2L1 | TUBB2B        |
| NDUFC1   | NONO          |
| KBTBD7   | SLC25A43      |
| WFDC6    | AGBL1         |
| PTGIR    | C16orf96      |
| CSDC2    | DMXL2         |
| NDFIP2   | BRD7          |
| PANO     | PDK3          |
| SERPINB9 | IQUB          |
| DHX16    | Igdcc4        |
| RNPEP    | HSPB3         |
| NRN1L    | Kncn          |
| TDGF1    | MRPL36        |
| EPS15L1  | COL4A1        |
| LEPRE1   | ZBTB14        |
| GUCA1A   | EFHC2         |
| SUMO4    | BUB1          |
| ST3GAL5  | STRN3         |
| SLTM     | PHOX2A        |
| CTNNB1   | Cela1         |
| HOOK1    | ADAT2         |
| TIE1     | FRMD4A        |
| OR6K3    | SIT1          |
| TRPV5    | ATCAY         |

|              |              |
|--------------|--------------|
| MTCH1        | FAU          |
| HCN2         | KCNK3        |
| GAGE7        | CDC25B       |
| ICAM1        | OR8K3        |
| GSTA1        | GZMA         |
| Rsg1         | CDCA3        |
| COIL         | FBXW11       |
| EFCAB7       | PIGN         |
| DRC1         | FKBP1A       |
| LOC101927050 | ACVR2B       |
| PAK3         | KCNK4        |
| LY6D         | ASB6         |
| PHLDA3       | NGFR         |
| SLC1A6       | PDE1C        |
| SH3BGR       | SERPINB3     |
| LRRC3        | TNFAIP8L3    |
| GRAMD1C      | TMEM159      |
| LRRC2        | YAP1         |
| RHNO1        | DEFB132      |
| COL7A1       | LOC100996782 |
| ZNF546       | TSPY8        |
| RGR          | LOC729458    |
| USP17L5      | CCDC171      |
| CCDC64B      | C8orf58      |
| HOXB7        | MROH5        |
| C2CD5        | MMEL1        |
| TMEM30B      | ATP6V1G3     |
| BTBD11       | CREG1        |
| LAT2         | TSSK1B       |
| SLC37A1      | TMEM47       |
| SIRT5        | PRPF4        |
| CRLS1        | TRIAP1       |
| MSLN         | ACBD5        |
| FREM3        | FAM136A      |
| METTL13      | SCAP         |

|           |              |
|-----------|--------------|
| DBR1      | ABCA8        |
| FAM76B    | MTURN        |
| DSG1      | ZP3          |
| TANK      | CHMP7        |
| TGDS      | MNS1         |
| MTO1      | IL4R         |
| PLEKHD1   | BID          |
| Ufl1      | SPCS2        |
| DPH7      | HS3ST5       |
| GCC2      | ZNF491       |
| ABCA9     | PPP6R1       |
| ZNF551    | ID4          |
| TFF1      | TBC1D22B     |
| MATN4     | C8orf86      |
| SLC34A2   | FBXL12       |
| TMEM132A  | DBH          |
| ATP10D    | DGKG         |
| SLC17A8   | SLC12A4      |
| GRK7      | DDC          |
| C7orf69   | POLR2J2      |
| XRN1      | ADCY6        |
| C20orf202 | TJAP1        |
| C12orf61  | DEPDC1       |
| CXCL13    | TBC1D10B     |
| CEP128    | RNF14        |
| NDUFA3    | MAP4K5       |
| VTCN1     | NPAT         |
| HBG2      | LOC100506127 |
| ANO5      | NPPB         |
| SOX17     | PKHD1        |
| AQP6      | IFNA1        |
| TMEM235   | ABCC10       |
| ORC1      | ABHD14A      |
| BID       | SEC23A       |
| PDGFA     | SCN11A       |

|              |              |
|--------------|--------------|
| GAGE12B      | LOC285500    |
| MIPEP        | LOC646021    |
| HIBCH        | LOC101929864 |
| GLRA2        | RPS4Y2       |
| ZNRF2        | ASNA1        |
| TLR1         | IKZF2        |
| POLR3B       | LRFN3        |
| CRK          | ZNFX1        |
| CNN3         | GTF2I        |
| SEC31A       | SLC25A12     |
| ACTL7B       | YWHAE        |
| HRASLS2      | RGS18        |
| STYXL1       | C1orf210     |
| CD28         | HSBP1L1      |
| ZNF140       | OR51T1       |
| LOC100130880 | FAM180B      |
| Scaf4        | OR5K1        |
| Tmem219      | TUT1         |
| DUSP5        | LCN2         |
| TARS         | CDC6         |
| LOC101928805 | EIF4E2       |
| KLHL1        | MICU2        |
| TNFAIP1      | AMELY        |
| SLC25A19     | UBQLN4       |
| PLCD3        | C22orf24     |
| SLC2A4       | ZCRB1        |
| Sp9          | IMMP2L       |
| TRAPPC2L     | SLMO1        |
| APOA4        | MS4A6A       |
| TAF1C        | PDIK1L       |
| PCDHGA9      | WFDC10A      |
| AURKAIP1     | TEKT3        |
| PDZRN3       | SLCO2A1      |
| Tmem237      | ADRB1        |
| MRPL49       | DDX19B       |



|             |           |
|-------------|-----------|
| FKBP10      | EID2      |
| FBXO2       | KCNIP1    |
| TMEM79      | ZMAT5     |
| HS1BP3      | SORL1     |
| CTBS        | MPO       |
| CSAG1       | ICAM1     |
| NGFR        | CCM2      |
| PPP1R16A    | GABRA5    |
| SNAPC1      | Rab44     |
| PPM1E       | MRO       |
| USF1        | NIPBL     |
| CRTAP       | MSTO1     |
| UROS        | AVEN      |
| NUP93       | CT45A4    |
| SERF2       | TMEM120B  |
| ERI2        | RASIP1    |
| ZNF492      | GSTCD     |
| BMPR2       | SATB1     |
| KCNAB1      | NSUN3     |
| HBG1        | SYNJ2     |
| CCDC3       | CCBE1     |
| FADS6       | SP100     |
| ZDHHC1      | USP5      |
| ZNF34       | AP1B1     |
| GNB4        | C1ORF27   |
| COX7C       | UCKL1     |
| METTL4      | FKBP5     |
| LIN37       | LOC149373 |
| MON1B       | HAL       |
| PPEF2       | TMEM98    |
| ODF3L1      | RBM38     |
| ARPC4-TTLL3 | ADAM22    |
| CDYL2       | IRF7      |
| MACF1       | C10ORF76  |
| ZNF397      | NRDE2     |

|              |              |
|--------------|--------------|
| MFSD11       | FAM212B      |
| GPSM3        | ZNF695       |
| SSMEM1       | ADAMTS1      |
| LOC101930392 | IFNLR1       |
| TCEAL3       | EPHA5        |
| AFF1         | CAMK2A       |
| TRIM50       | ABAT         |
| NRCAM        | LY75-CD302   |
| TAF13        | TMEM182      |
| RPL23        | STMN3        |
| B3GAT2       | SPRYD7       |
| TRIM52       | MEGF8        |
| PNPLA6       | OTC          |
| LBX1         | HTRA1        |
| PDPK1        | A3GALT2      |
| POLR3G       | ACE2         |
| RAB21        | MTIF2        |
| TMEM211      | OR4B1        |
| TRIM38       | COG3         |
| PYGL         | TGFBR1       |
| UBE2D4       | C1orf56      |
| PDGFD        | KRT71        |
| EFHC2        | TPD52L1      |
| SPINK1       | SLC25A37     |
| LOC101930235 | CCDC92       |
| RRAGA        | PCDHGA1      |
| FBXW12       | TEX12        |
| FXVD4        | CHD9         |
| KIF1A        | LOC100652901 |
| CYP4F2       | OR111        |
| ARFGEF2      | PTGER3       |
| C7           | STX8         |
| DEPDC1       | KIF5B        |
| ENAM         | SMS          |
| MTFR1        | OR2C1        |

|              |          |
|--------------|----------|
| FAM47E-STBD1 | IFT22    |
| ZYG11A       | KRT74    |
| TICRR        | ABCB8    |
| C1orf137     | OLFM1    |
| TUBAL3       | PLCB3    |
| TRIAP1       | KCNJ18   |
| SRI          | SLC14A2  |
| NADK2        | CPXM2    |
| CCNT1        | LRFN2    |
| CYC1         | DAZ3     |
| RPA3         | PRB4     |
| CCDC177      | FXD1     |
| SETDB1       | POLR2J   |
| NRSN1        | EZH1     |
| VSTM4        | USP21    |
| HMGXB3       | ZNF502   |
| ANGPTL3      | PTK6     |
| GPR114       | FAM186A  |
| CACHD1       | SPON1    |
| PPARA        | GLOD5    |
| DYNC2H1      | SUFU     |
| APOBEC4      | ADAD1    |
| CEP57L1      | MIPEP    |
| BMP5         | FAM63A   |
| BBS2         | METTL7A  |
| NRGN         | PNPLA3   |
| TAF11        | GTF2A2   |
| C7orf61      | CD1E     |
| GLI4         | ACSM4    |
| NFAM1        | SLC35E2  |
| OR2L8        | HSPH1    |
| IFNA17       | CPLX2    |
| TMEM178A     | MFI2     |
| CMA1         | C1orf115 |
| PPM1L        | HPD      |

|              |          |
|--------------|----------|
| LOC101930441 | GRXCR2   |
| C14orf178    | ZNF219   |
| TAS2R30      | SNX5     |
| LOC101928282 | COL19A1  |
| ACOX1        | PDZRN4   |
| ACSM4        | SLC50A1  |
| TRNP1        | APOE     |
| MRPS2        | MRPL4    |
| SPRR4        | DAGLB    |
| Ralgapa2     | PDC      |
| ZNRF3        | BRINP3   |
| TMEM175      | STX1A    |
| PTER         | GPR173   |
| LOC388780    | Hrct1    |
| LOC101060580 | HIPK2    |
| AURKC        | ARPC4    |
| THYN1        | ZNF8     |
| TOM1L2       | VEZT     |
| CCDC154      | ACOT12   |
| PTEN         | NUDT19   |
| SLC20A1      | CCDC94   |
| KCNJ14       | NDUFS6   |
| TMLHE        | TP53AIP1 |
| LYRM2        | ACSF3    |
| KPNA7        | ZRANB1   |
| CPN1         | HN1      |
| COX7B2       | KRT4     |
| DISP1        | MUTYH    |
| MAP4K1       | KLHL40   |
| RTCA         | AGAP5    |
| SLC39A10     | ANKRD10  |
| OR4A15       | CSF3R    |
| CARD10       | IFI44    |
| C17orf99     | IL16     |
| TMEM18       | CNFN     |

|          |              |
|----------|--------------|
| NTMT1    | TSSC4        |
| POTEG    | ZNF714       |
| BRAT1    | ANK2         |
| GPR64    | TMEM229A     |
| NPAT     | Speg         |
| ARL2     | CEP250       |
| AP1S2    | VPS54        |
| HSPBP1   | PHLPP2       |
| KDM1A    | LIMD2        |
| TMEM155  | Dnajc27      |
| CTDSPL   | SLC22A25     |
| PRDM14   | ATP6V1E2     |
| PTPRA    | PMCH         |
| GALP     | LOC101927050 |
| PPP1R35  | FAM171A2     |
| CORT     | Ptpmt1       |
| PLEK     | VPS4B        |
| DNAJC2   | PIGR         |
| ARID4B   | WDR72        |
| TM4SF5   | LSM12        |
| TEP1     | CD6          |
| TMEM214  | PDE1B        |
| SAMD11   | DPP4         |
| SLMAP    | MRPL42       |
| LEP      | RNASEK       |
| SURF1    | HIST1H2BK    |
| CYTL1    | C1orf50      |
| NLGN1    | ATG10        |
| IFI44    | KLF2         |
| DLX1     | ZNF43        |
| CACNG5   | SOX8         |
| ELMSAN1  | SLFN5        |
| SMCO3    | TMEM107      |
| ADAMTS20 | PHYKPL       |
| SPPL2B   | Agap1        |

|              |              |
|--------------|--------------|
| EFCAB5       | C21ORF59     |
| SPATA25      | CNTN6        |
| RHOU         | C10ORF91     |
| RNF157       | CYP26A1      |
| ALPP         | LOC101928044 |
| FRAT2        | CRX          |
| RNF43        | CCR9         |
| MAML2        | MANEAL       |
| METTL21C     | KLRC3        |
| CALCR        | SLC41A1      |
| GPR128       | RAP2C        |
| Fam174b      | TPBGL        |
| CORO1B       | SSRP1        |
| OASL         | STX11        |
| EML3         | NR2F6        |
| UGP2         | ODF2L        |
| PLA2G1B      | EGFR         |
| DIS3L        | Ect2l        |
| GPR62        | C9ORF84      |
| FAM189A1     | DRAXIN       |
| CES3         | OR1J4        |
| LOC100130520 | C5orf46      |
| ALDH1L2      | BTF3         |
| ASCC3        | MYL6B        |
| COMTD1       | GYG1         |
| TFG          | C3orf55      |
| SALL3        | LARGE        |
| CCDC63       | PLS3         |
| DEAF1        | KITLG        |
| CRY2         | FZD9         |
| SUDS3        | ABCD3        |
| CHIA         | ATP6V0E2     |
| KIAA1841     | TENM1        |
| SHISA8       | MBIP         |
| EFNB1        | TSTD1        |

|              |         |
|--------------|---------|
| MGEA5        | GDE1    |
| TWF2         | C7orf43 |
| KRT6A        | XPNPEP1 |
| DNAJB1       | TXNRD1  |
| GLP1R        | ZNF846  |
| LOC101930059 | KCTD18  |
| PODN         | EML5    |
| STAM2        | NXT2    |
| FAM196A      | PTGR1   |
| HOXD13       | FAH     |
| C12orf45     | ARFGAP1 |
| SLC41A3      | DOLK    |
| RBBP5        | SNAI1   |
| WDSUB1       | ERC2    |
| STK19        | ZZEF1   |
| E2F5         | EXO5    |
| NCS1         | TMEM215 |
| KIF5B        | UBE2H   |
| AARSD1       | ATP13A5 |
| KISS1        | P2RY12  |
| UGT8         | SLC1A7  |
| STX1A        | BTF3L4  |
| HSFX1        | RHPN1   |
| ZGPAT        | PLA2R1  |
| LOC101930553 | IQGAP2  |
| FKBP7        | NSMCE1  |
| CARHSP1      | SNTG1   |
| SRPK3        | AMER2   |
| TCP11X2      | ULBP3   |
| C1QL2        | HOXA4   |
| TRMT2A       | C3AR1   |
| KLF5         | OR5AK2  |
| MRPS10       | Nrg1    |
| AQP10        | CD37    |
| SLC25A13     | CANT1   |

|              |         |
|--------------|---------|
| ANKRD45      | DOCK1   |
| PGM3         | OR1A1   |
| ZFP41        | DYNC1I1 |
| CDKL4        | HGS     |
| Ubxn6        | USP1    |
| ALG2         | DMGDH   |
| GABRE        | RNF181  |
| HIST1H2AH    | MICALL1 |
| LOC100996412 |         |
| LOC100129520 |         |
| GTF2A1L      |         |
| ADD1         |         |
| COX5A        |         |
| DAK          |         |
| SLC44A2      |         |
| WWTR1        |         |
| RAB3IP       |         |
| ERVV-1       |         |
| RLN3         |         |
| OR5H15       |         |
| ACSS1        |         |
| CCL3L3       |         |
| SHROOM2      |         |
| IL1R1        |         |
| DDX10        |         |
| GCLC         |         |
| ARAF         |         |
| DCAF12L2     |         |
| PAPPA        |         |
| GPC5         |         |
| SLITRK6      |         |
| CRH          |         |
| LYPD3        |         |
| PPP1R1C      |         |
| PCDHA7       |         |



|           |
|-----------|
| MORC1     |
| MYH6      |
| TXNDC15   |
| TCEB3B    |
| OR52N4    |
| BYSL      |
| CABP1     |
| ZNF619    |
| CD164L2   |
| KMO       |
| MALRD1    |
| TACR3     |
| WDR83     |
| RAB11FIP4 |
| MCHR1     |
| SPANXN2   |
| EFCAB4A   |
| WNT9B     |
| GCNT4     |
| PON1      |
| TRAK1     |
| SNX16     |
| HSD17B3   |
| PCDHGA4   |
| SEC14L6   |
| ZNF562    |
| TXNDC2    |
| PITHD1    |
| DUSP22    |
| Gpank1    |
| HLA-DMA   |
| DEFB129   |
| LEPREL2   |
| GDF7      |
| BCL7B     |

|              |
|--------------|
| PPRC1        |
| GMFB         |
| QRICH1       |
| GAGE12G      |
| SIX1         |
| ZBTB48       |
| PHACTR1      |
| CDH11        |
| PIGP         |
| C18ORF8      |
| RHOF         |
| ZC2HC1A      |
| PTK2B        |
| OR7A10       |
| RBM47        |
| TNKS1BP1     |
| SLCO1B1      |
| GABRG3       |
| BATF         |
| SLC25A36     |
| AKNA         |
| LOC100653225 |
| FBXO44       |
| ZNF597       |
| MARVELD3     |
| CYP2U1       |
| GTSF1L       |
| E2F6         |
| RIC3         |
| MAPK7        |
| SERPINB3     |
| TUFM         |
| HBE1         |
| ASCC1        |
| TUSC3        |

|              |
|--------------|
| DDX17        |
| NEK9         |
| GLI1         |
| SPTLC1       |
| BARHL2       |
| CXCL6        |
| PLLP         |
| MS4A14       |
| TDO2         |
| PPAPDC2      |
| GNE          |
| ZNF250       |
| UCP3         |
| TEX15        |
| NGFRAP1      |
| PSKH1        |
| AMY1B        |
| CBX6         |
| C11orf35     |
| TMEM200A     |
| KIAA1024L    |
| GH2          |
| GSDMA        |
| SLC35C1      |
| DEGS1        |
| APOA2        |
| FAAH2        |
| LOC101928486 |
| GLRB         |
| SH2B2        |
| IRAK2        |
| MTFP1        |
| MAGED2       |
| QSOX2        |
| TGFBR3L      |

|              |
|--------------|
| ALDH7A1      |
| OR7C2        |
| FMR1NB       |
| STRBP        |
| C11orf74     |
| CLDN1        |
| JAKMIP1      |
| ABCG2        |
| Sym          |
| ANG          |
| AMHR2        |
| TMEM45B      |
| PEX26        |
| LOC100862671 |
| SH2D4A       |
| HMCN1        |
| POM121       |
| FOXD4L4      |
| LOC101060181 |
| HIBADH       |
| ZNF705A      |
| PLEKHO1      |
| MUC15        |
| KPRP         |
| TLCD2        |
| OR5B12       |
| CAPZA2       |
| LUZP6        |
| ACTG1        |
| TCEB3CL      |
| AGPAT1       |
| GMNC         |
| PUM1         |
| ACTBL2       |
| HCRTR2       |

|                |
|----------------|
| ETV5           |
| IDS            |
| BHLHA15        |
| MVB12A         |
| C12orf29       |
| STYX           |
| KCTD5          |
| SQLE           |
| CLDN15         |
| FGGY           |
| CCNI2          |
| ZMYM1          |
| ZNF816-ZNF321P |
| RBFOX3         |
| AMOTL2         |
| PCYT2          |
| LIME1          |
| ODF2L          |
| ZSWIM8         |
| P2RY8          |
| PLA2G15        |
| USP17L2        |
| ZNF555         |
| CLEC4M         |
| RPS6KA3        |
| MYO18B         |
| ACRV1          |
| ABCC3          |
| KLHL40         |
| MYOD1          |
| MYLK3          |
| GYPE           |
| SLC25A44       |
| LCE1F          |
| PDLIM7         |

|              |
|--------------|
| LOC101927850 |
| CRAT         |
| CETP         |
| OSGEP        |
| CCDC172      |
| PRSS35       |
| NPPB         |
| HK3          |
| VWCE         |
| PSEN1        |
| OR52N5       |
| CCNT2        |
| ZNF180       |
| PAXIP1       |
| AWAT2        |
| PFN2         |
| KIF1B        |
| TMEM123      |
| CASP4        |
| IL2RG        |
| TULP4        |
| CDC14B       |
| RAB23        |
| SACS         |
| DNAH14       |
| Ccdc39       |
| CREB5        |
| STIM1        |
| Fam181b      |
| ESM1         |
| PRKAR1A      |
| STARD10      |
| ACSL6        |
| RDH13        |
| CTCFL        |

|          |
|----------|
| ZC4H2    |
| ZFP62    |
| DOT1L    |
| PTGR2    |
| FLRT2    |
| ZCCHC3   |
| HRASLS5  |
| CLEC18B  |
| TRIM28   |
| Dcaf8    |
| ZBTB26   |
| CTHRC1   |
| TMPRSS6  |
| LRRC10B  |
| EGLN1    |
| PKLR     |
| TMEM59   |
| MYBL1    |
| TMEM191B |
| LEPREL4  |
| TLN1     |
| Ccdc138  |
| NELFE    |
| GPR22    |
| AVPR1B   |
| LIMK2    |
| VIP      |
| NPTX2    |
| LIN7C    |
| CTSK     |
| NT5C     |
| REG4     |
| UBE3C    |
| TMEM244  |
| GPS1     |

|              |
|--------------|
| PLA2R1       |
| MTNR1A       |
| SMIM4        |
| HCST         |
| DPY19L3      |
| ZNF70        |
| NUDT6        |
| MAP9         |
| LASP1        |
| C19orf83     |
| RORC         |
| DDIT3        |
| ZNF462       |
| Acap3        |
| CDCA3        |
| TMEM249      |
| WFDC11       |
| SLC1A4       |
| FXN          |
| VN1R4        |
| ANKRD60      |
| ACSM3        |
| NKIRAS2      |
| FAM160A1     |
| NHSL1        |
| TRIM39-RPP21 |
| C1orf198     |
| BRD7         |
| FHAD1        |
| DCAKD        |
| BICD2        |
| C19orf60     |
| STK36        |
| C2orf76      |
| TMEM177      |



|          |
|----------|
| NONO     |
| STRN     |
| SIGLEC8  |
| PRSS21   |
| CTDSP1   |
| NMT1     |
| HIPK4    |
| P2RY13   |
| EML1     |
| IFT74    |
| C5orf54  |
| HINT3    |
| PRDM1    |
| GNRHR    |
| SDE2     |
| TMEM262  |
| TAS2R9   |
| CNOT2    |
| MRPL15   |
| ARNTL    |
| Rnf144b  |
| MAN1A2   |
| NXPH4    |
| NQO1     |
| ZNF718   |
| PCDHB10  |
| KCNK17   |
| ARMC12   |
| C1orf189 |
| AK6      |
| PABPC5   |
| PRR21    |
| VN1R2    |
| TMEM50B  |
| FAM107B  |

|            |
|------------|
| CTAGE6     |
| SARS       |
| UBE3B      |
| Itpripl2   |
| TOR1A      |
| CCDC176    |
| ATG2B      |
| GPATCH2L   |
| OR10J3     |
| RPL36AL    |
| CCDC167    |
| APOBEC3A_B |
| PAX6       |
| NUP188     |
| TREH       |
| SLC22A7    |
| RHOXF1     |
| AMIGO1     |
| AHCYL1     |
| EPYC       |
| NPM1       |
| MYO10      |
| CCDC152    |
| APOA1BP    |
| SPON1      |
| TNR        |
| ZCCHC7     |
| RNF150     |
| UCN2       |
| LTB4R      |
| ZNF776     |
| RHOBTB1    |
| Pirt       |
| STK31      |
| KPNA2      |

|              |
|--------------|
| LPPR4        |
| SETD2        |
| RRAGD        |
| EMC1         |
| CDC34        |
| ZNF530       |
| WDTC1        |
| MEPCE        |
| HSDL2        |
| CXorf51A     |
| UGT1A10      |
| ZDHHC21      |
| ARFGAP1      |
| ACE          |
| SH3PXD2B     |
| NKX2-6       |
| CAMK1        |
| ACADVL       |
| APOA5        |
| LRRC48       |
| PSMA1        |
| LOC101060161 |
| DMRT3        |
| BCHE         |
| MBL2         |
| GHRHR        |
| SYVN1        |
| SARM1        |
| FAM91A1      |
| APC          |
| USP17L28     |
| PPOX         |
| STRC         |
| XKRX         |
| SMIM20       |

|          |
|----------|
| ELAVL2   |
| GPKOW    |
| WRAP73   |
| PIAS4    |
| BRD1     |
| NOX5     |
| KIF17    |
| OR9K2    |
| CLCC1    |
| PVRL1    |
| GBGT1    |
| TSSK1B   |
| HHAT     |
| TELO2    |
| AMY2A    |
| ADRB3    |
| EFNA5    |
| SLC22A9  |
| FBXL20   |
| LRTM1    |
| SH3PXD2A |
| C1orf229 |
| INHBA    |
| SPTBN1   |
| MAST2    |
| OR5M11   |
| ERVW-1   |
| FBL      |
| TRAPPC4  |
| SLC43A2  |
| TEC      |
| ZNF665   |
| LDLRAD4  |
| STK39    |
| EHD4     |

|              |
|--------------|
| ADCY5        |
| KDEL3        |
| MR1          |
| VPS13A       |
| ZNF382       |
| CDS2         |
| OR51G1       |
| ZFYVE9       |
| DDX51        |
| GUCY1A3      |
| SLC22A3      |
| RNASE2       |
| ITPKB        |
| FXYD5        |
| YWHAG        |
| LOC101930515 |
| CNBP         |
| LOC101927989 |
| FBXL4        |
| C4BPB        |
| ERCC3        |
| C12orf40     |
| GRHL3        |
| HPCA         |
| IFNGR2       |
| RIMS4        |
| ZNF354B      |
| HECTD4       |
| CNFN         |
| KLF13        |
| NARG2        |
| MCF2L        |
| TMEM259      |
| LRRC61       |
| GSKIP        |

|           |
|-----------|
| HDGF      |
| SCN4B     |
| GAGE4     |
| SLC35G1   |
| CSRP1     |
| LSM14A    |
| LAMTOR2   |
| BCAM      |
| TRIM14    |
| FAM206A   |
| MARS2     |
| YAP1      |
| NKX3-1    |
| SPOCK3    |
| SPATA5L1  |
| TNFAIP8L1 |
| ZC3H6     |
| ACTN3     |
| C12ORF5   |
| ST6GAL2   |
| TAAR2     |
| GPR20     |
| PLGLB1    |
| MBD3L2    |
| EFCAB14   |
| PHYHIPL   |
| CHADL     |
| PRMT8     |
| CDK4      |
| WDFY1     |
| LINC00684 |
| E2F8      |
| ALG11     |
| PKD1L1    |

Supplementary Table S8: Mutation quantitation.

|                   | siControl  | siCOPS2    | siCON, per bp | siCOPS2, per bp |
|-------------------|------------|------------|---------------|-----------------|
| Insertions        | 26,447     | 18,890     | 1.08E-03      | 1.05E-03        |
| Deleted bases     | 23,281     | 20,741     | 9.53E-04      | 1.15E-03        |
| Deletions         | 22,670     | 15,924     | 9.28E-04      | 8.85E-04        |
| Matches . Forward | 14,618,326 | 6,585,050  |               |                 |
| Matches , reverse | 9,809,032  | 11,402,716 |               |                 |
| Mismatches        | 4436       | 3651       | 1.82E-04      | 2.03E-04        |
| Mapped bases      | 24,428,301 | 17,988,425 |               |                 |
| read fragments    | 46,792     | 37,428     |               |                 |
|                   |            |            |               |                 |
|                   |            |            |               |                 |
|                   | siControl  | siCOPS2    | siCON, per bp | siCOPS2, per bp |
| Insertions        | 26,447     | 18,890     | 1.08E-03      | 1.05E-03        |
| Deletions         | 23,281     | 20,741     | 9.53E-04      | 1.15E-03        |
| Mismatches        | 4,436      | 3,651      | 1.82E-04      | 2.03E-04        |
| Mapped bases      | 24,428,301 | 17,988,425 |               |                 |
